# Supplementary material for: Rethinking Transcriptional Activation in the Arabidopsis Circadian Clock
Source: PubMed Central journal article supplement (PMC4102396; doi:10.1371/journal.pcbi.1003705), 2014-07-17

Scale group 1, scost 0.0218995

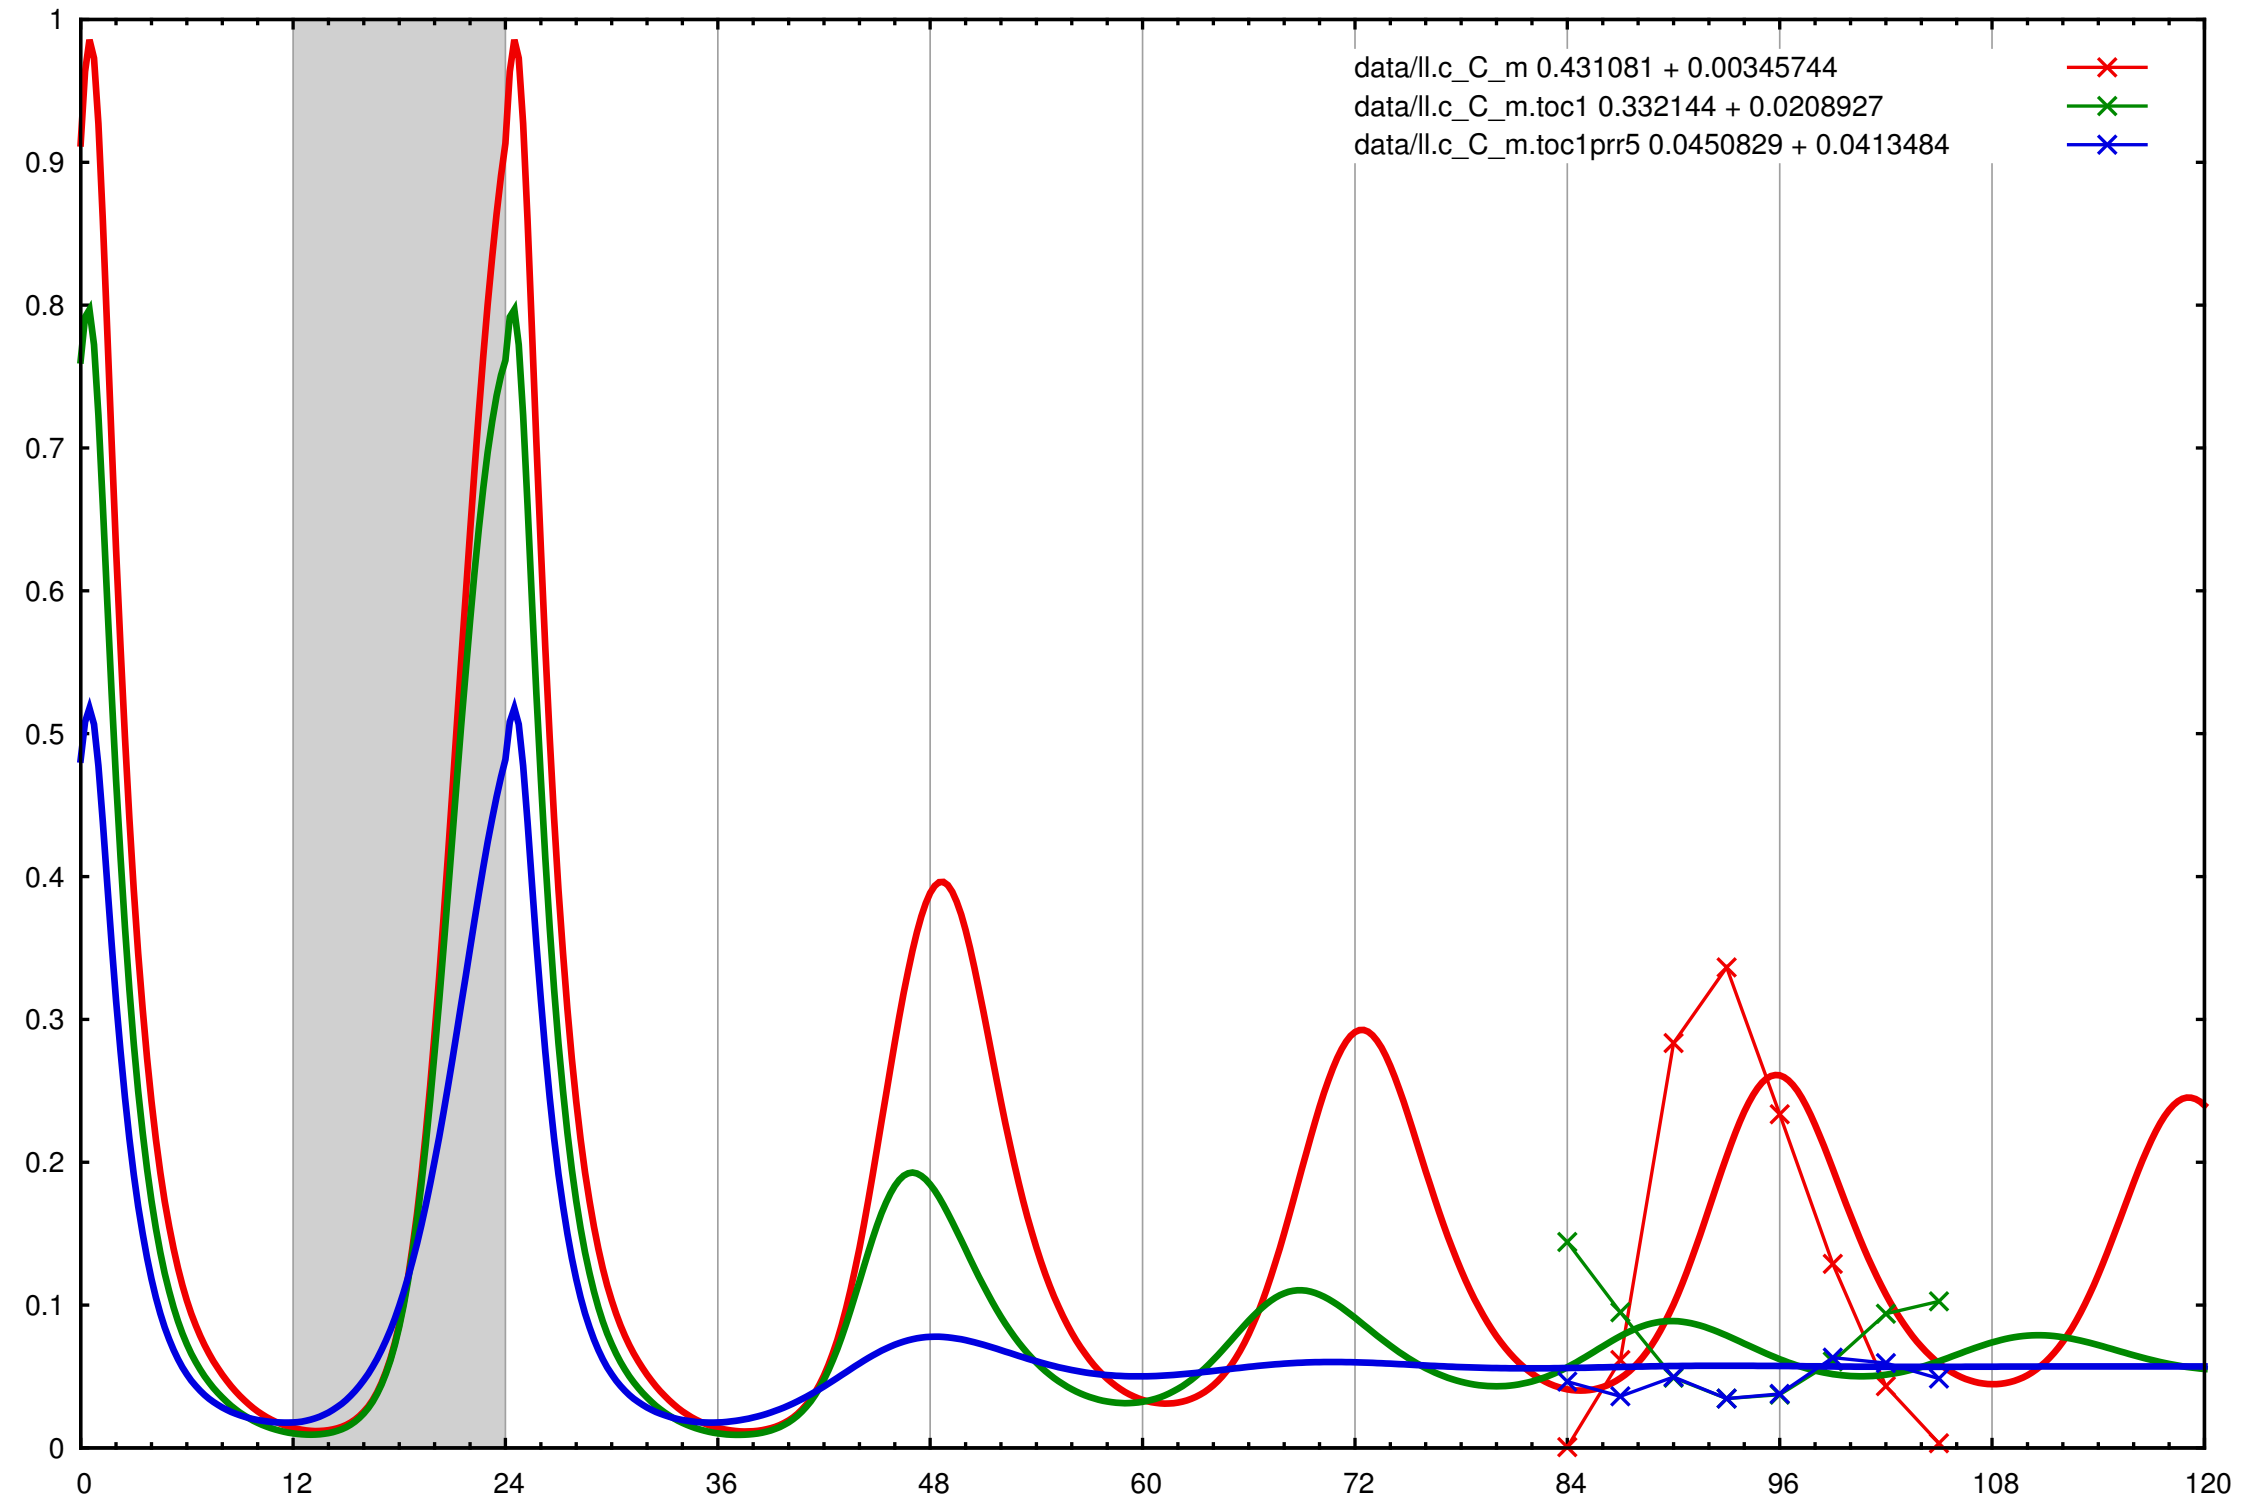

Scale group 2, scost 0.00922275

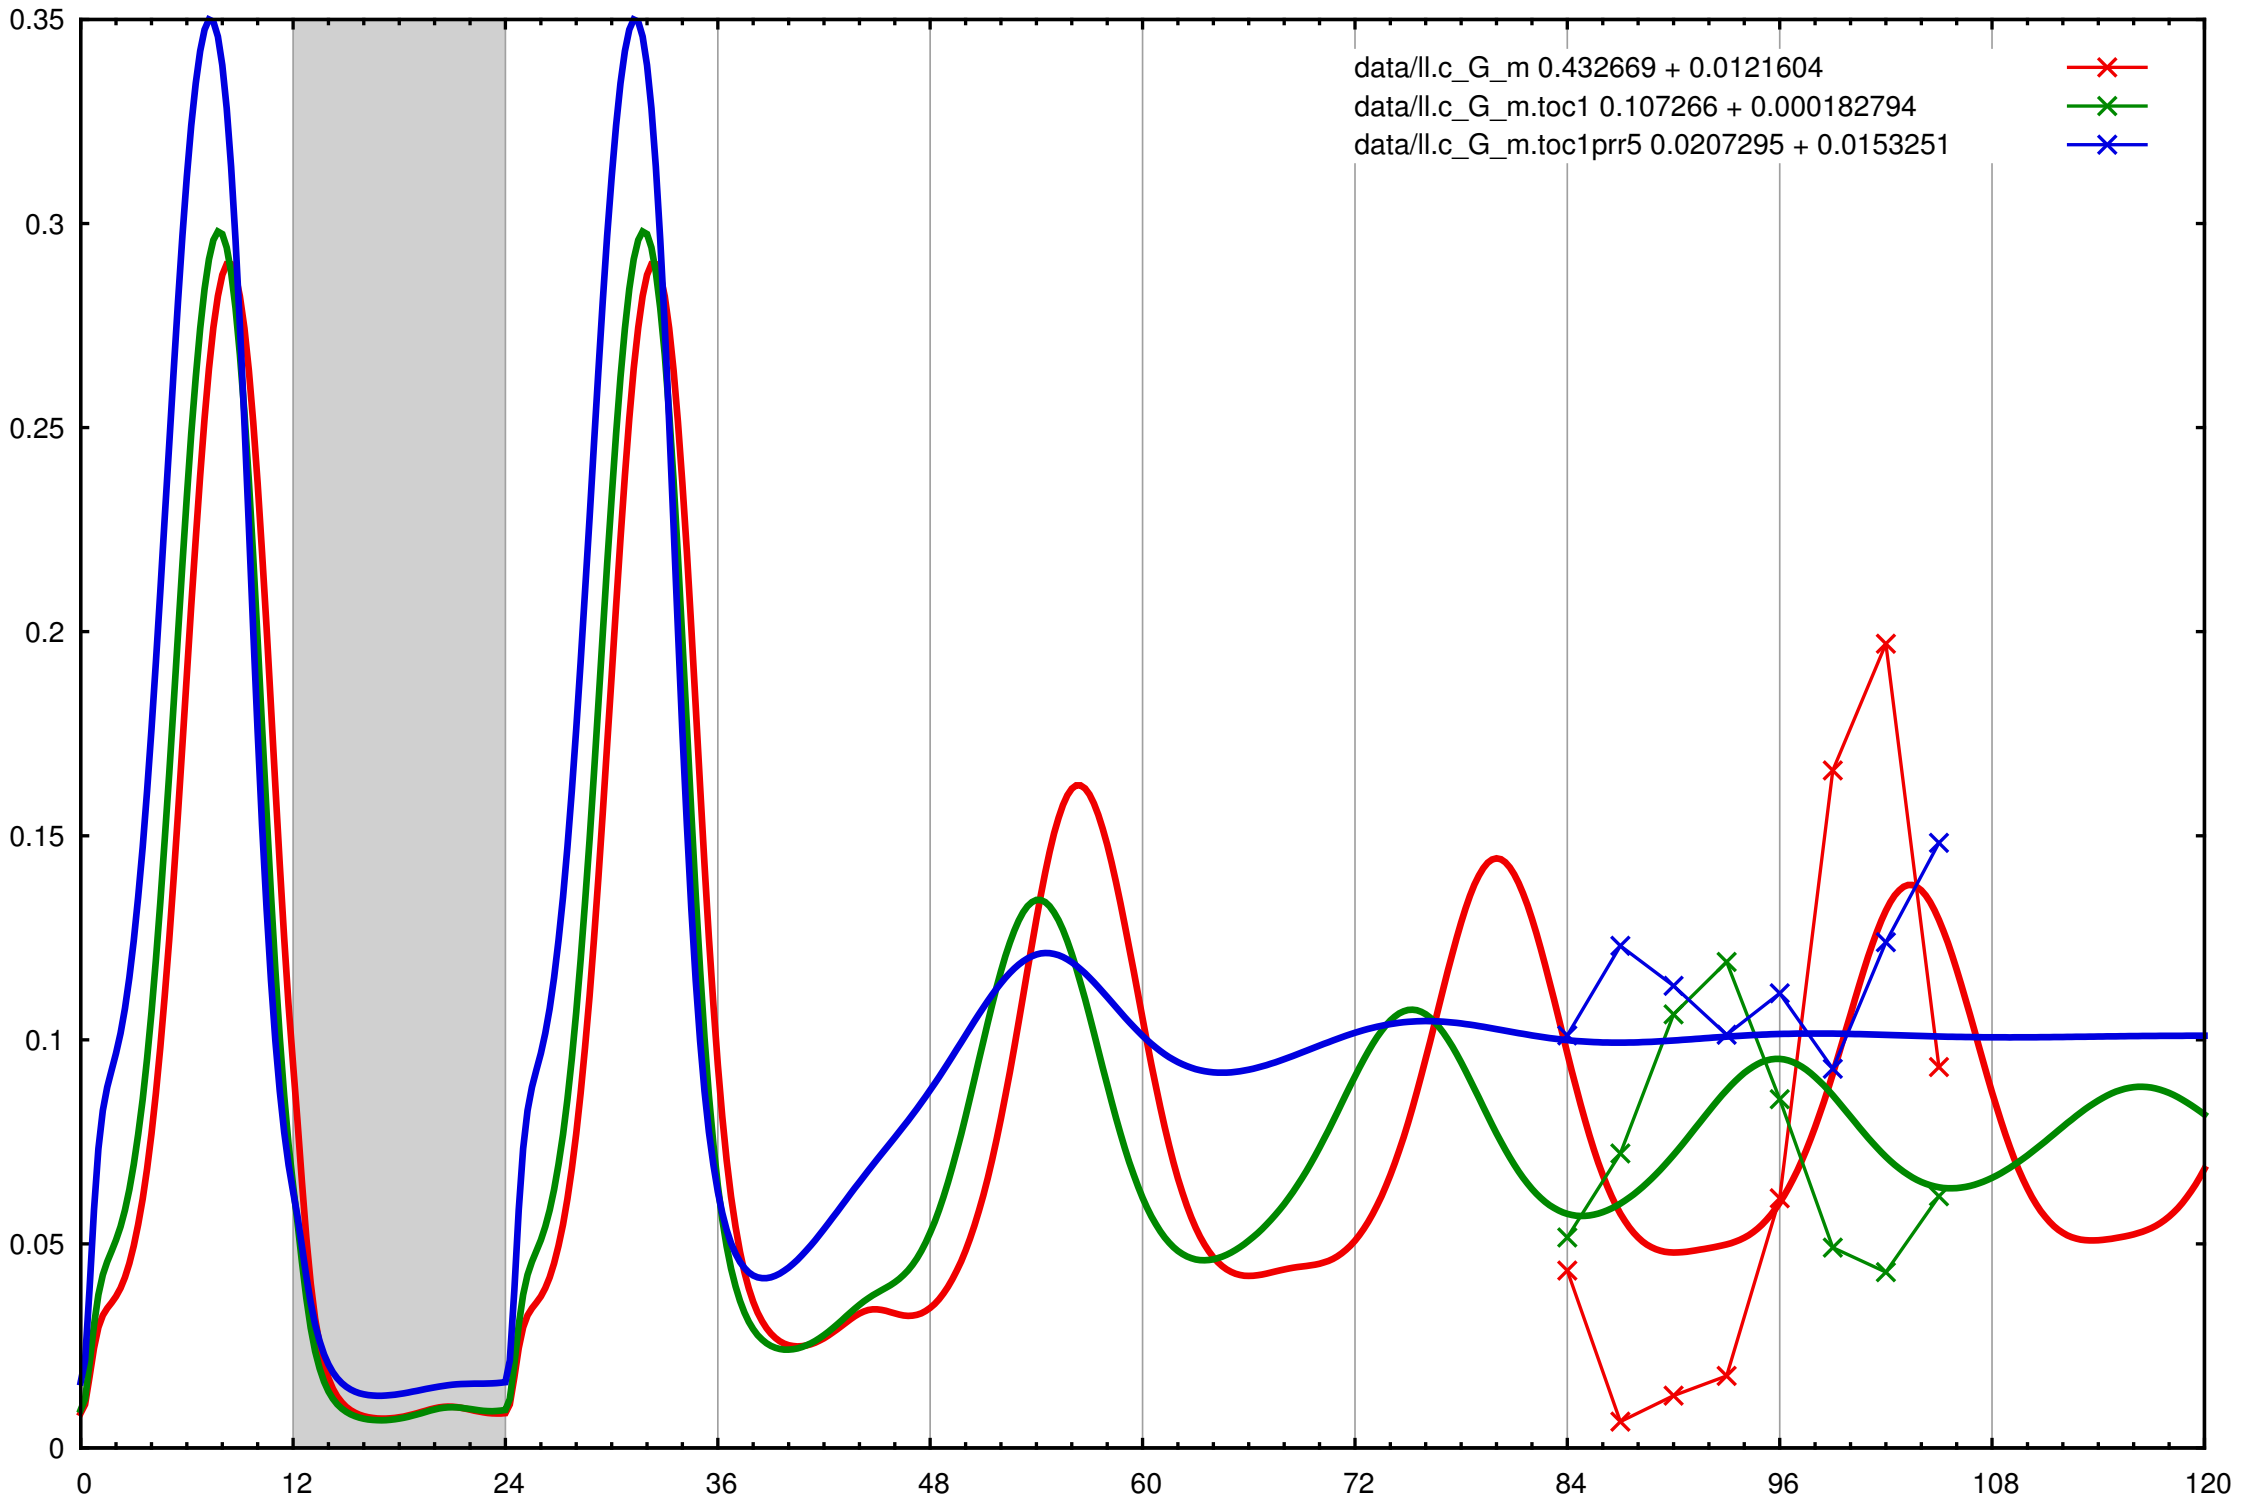

Scale group 3, scost 0.0300837

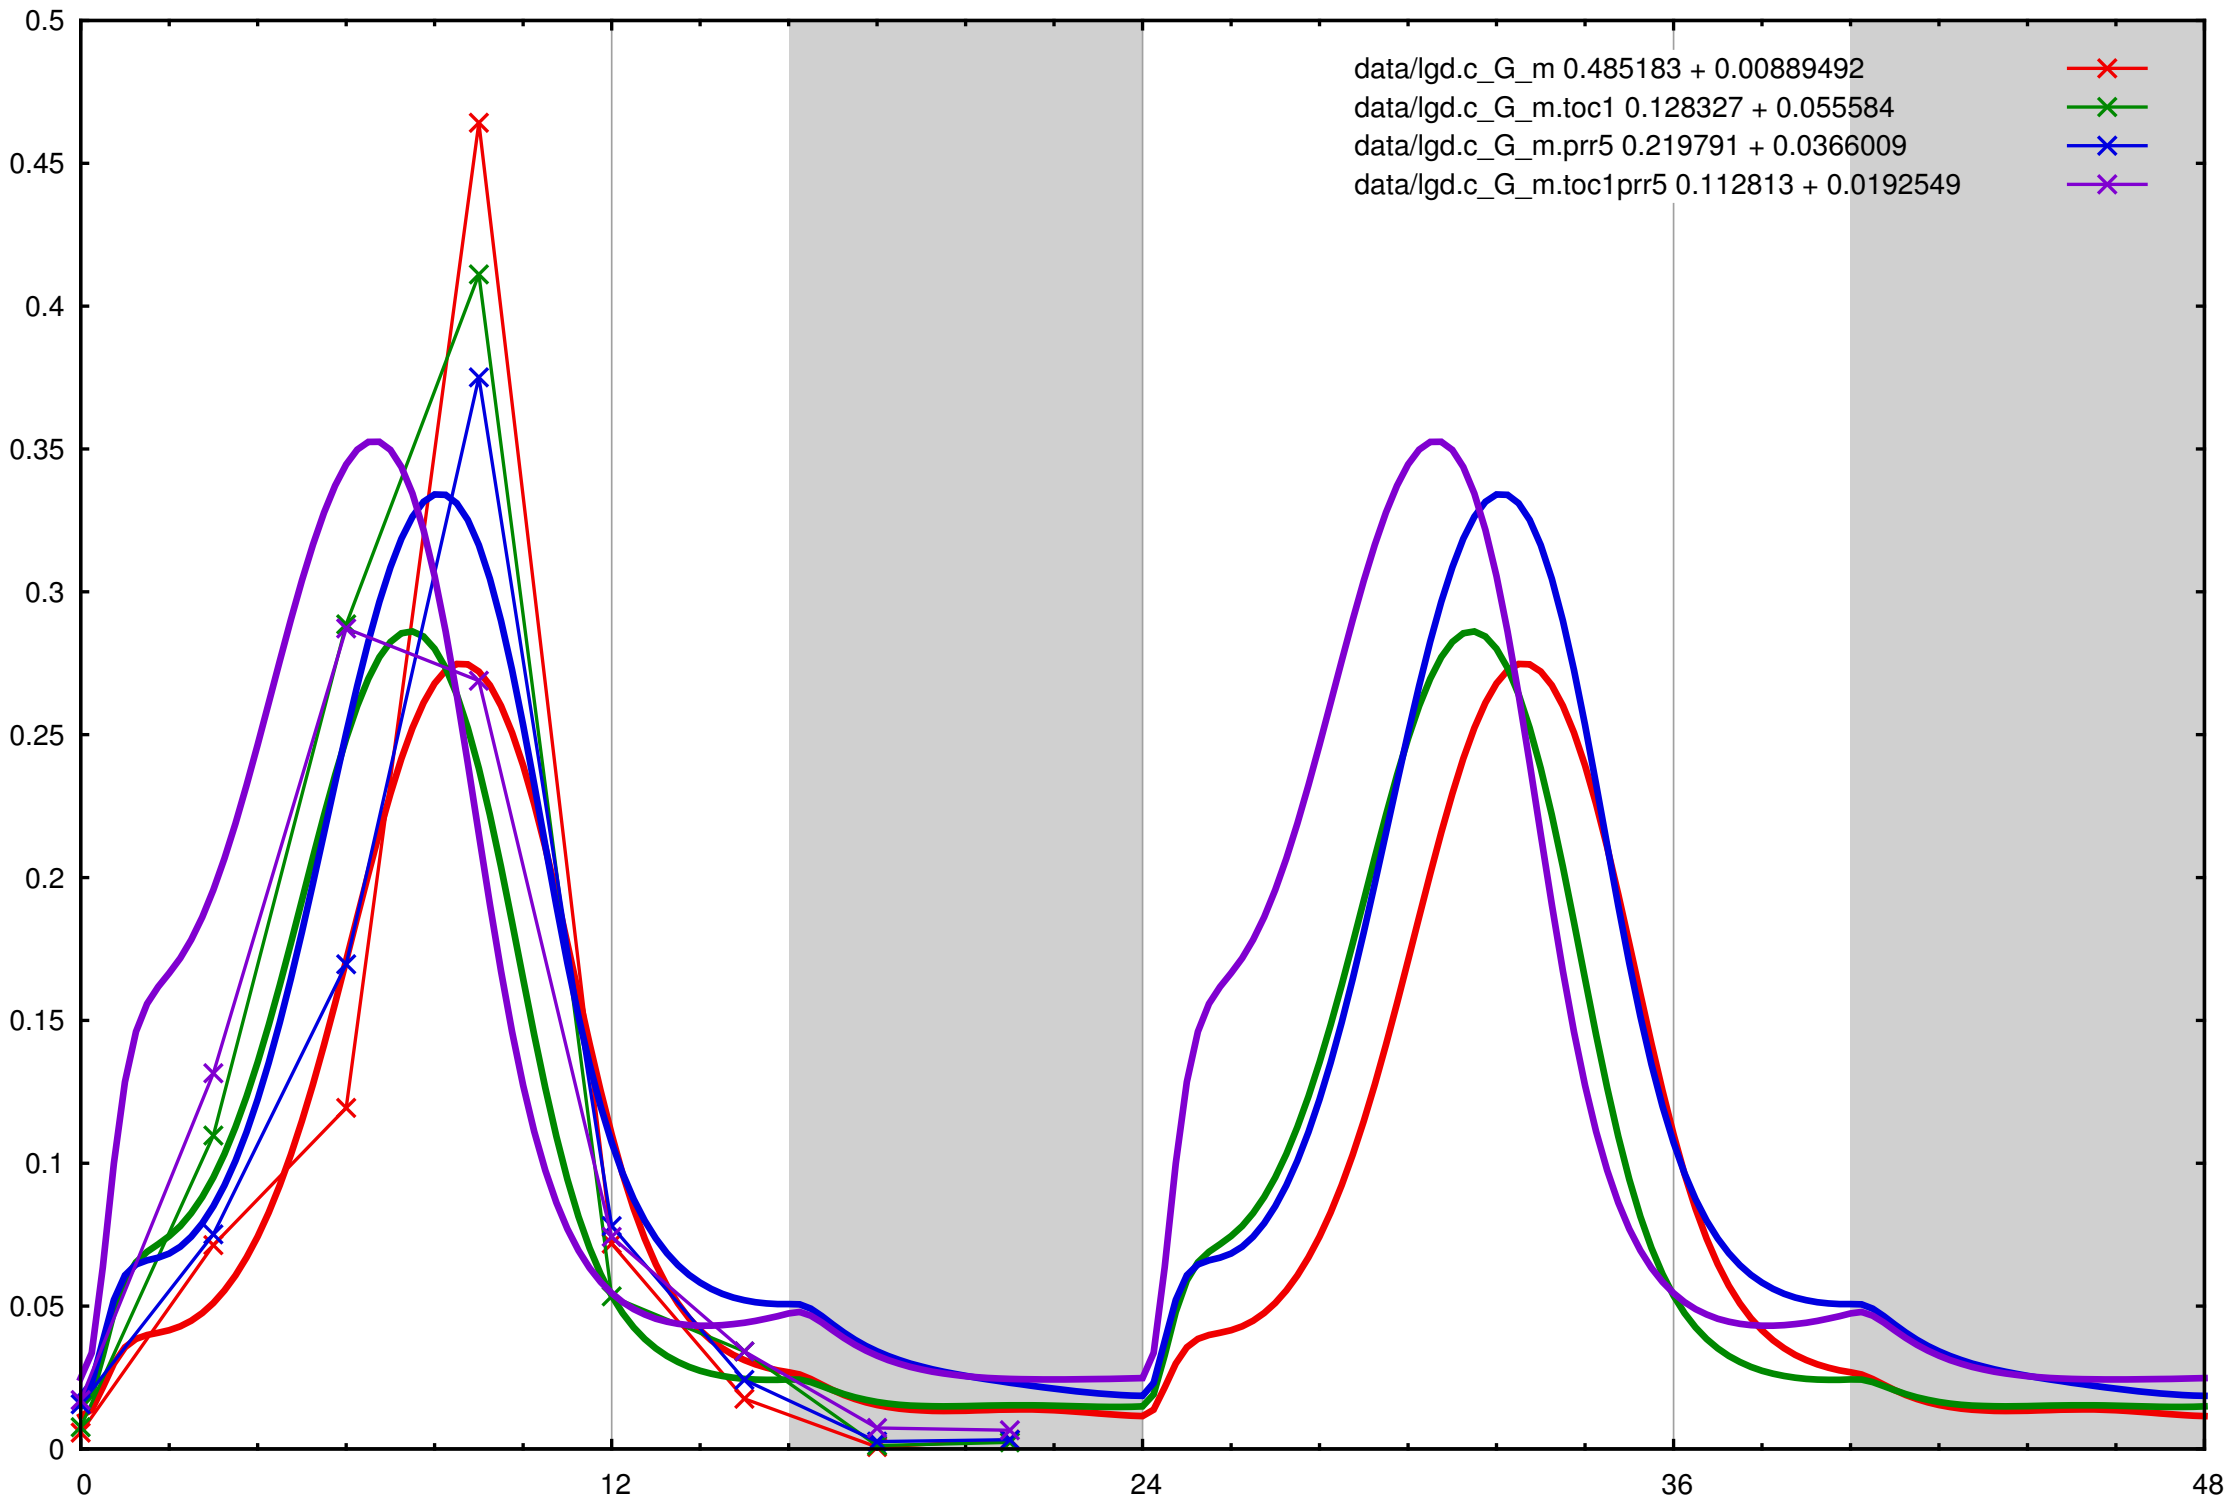

Scale group 4, scost 0.0363922

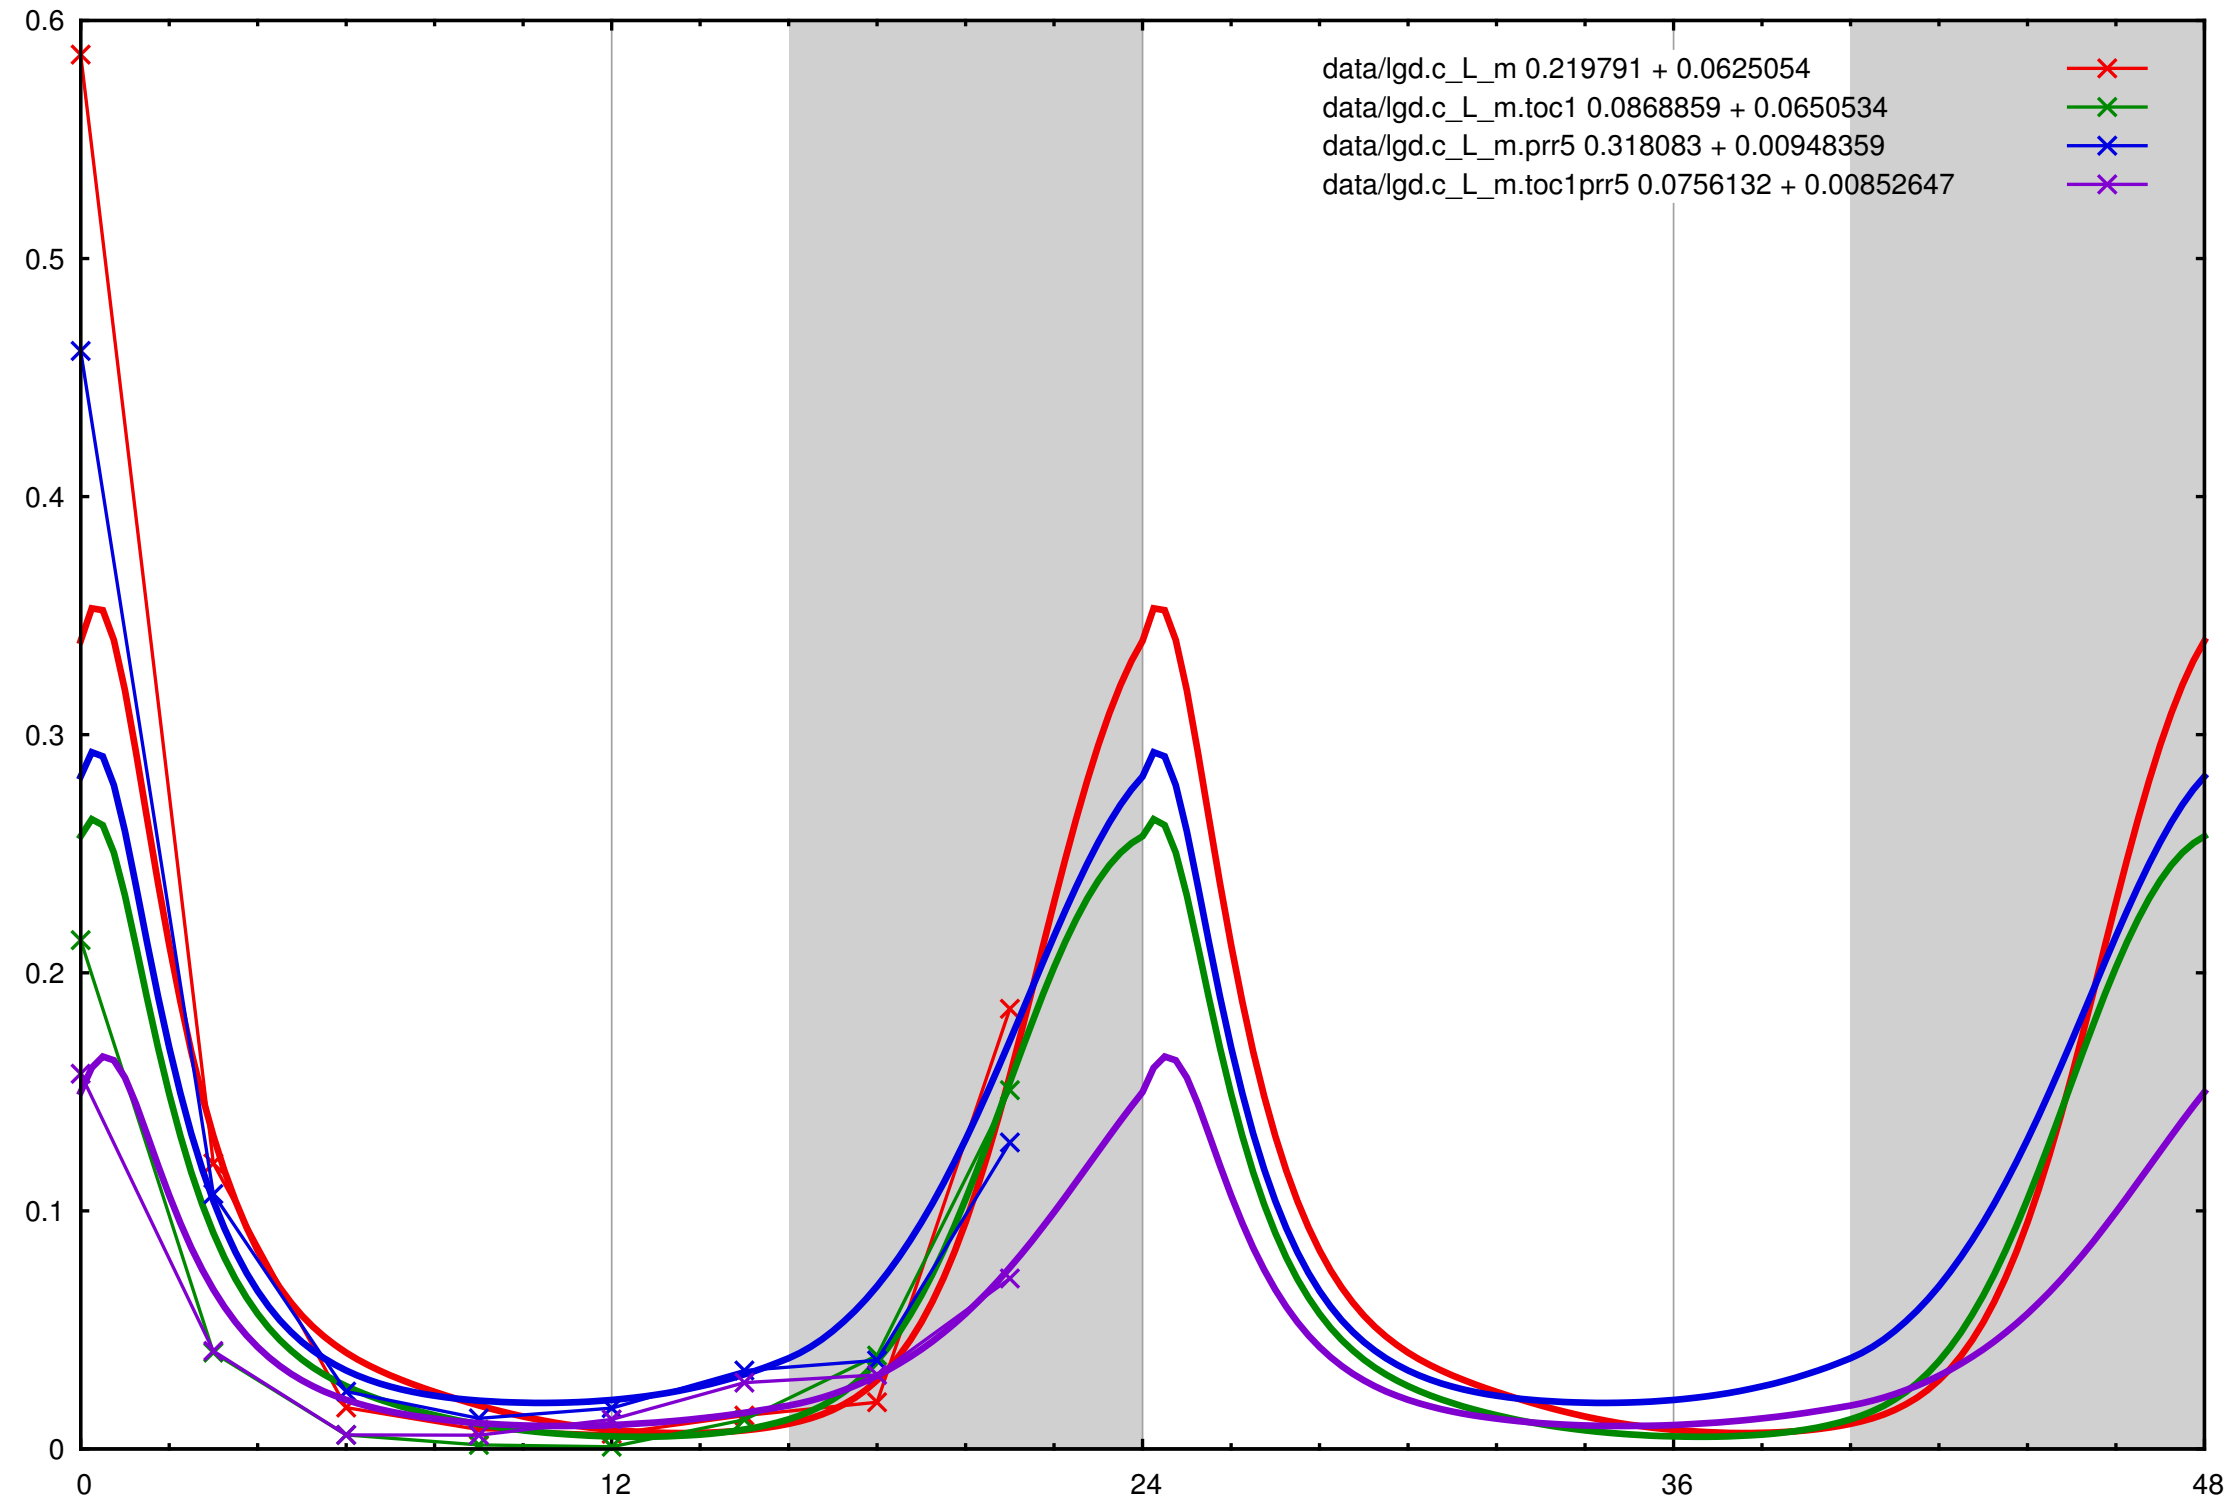

Scale group 5, scost 0.00790124

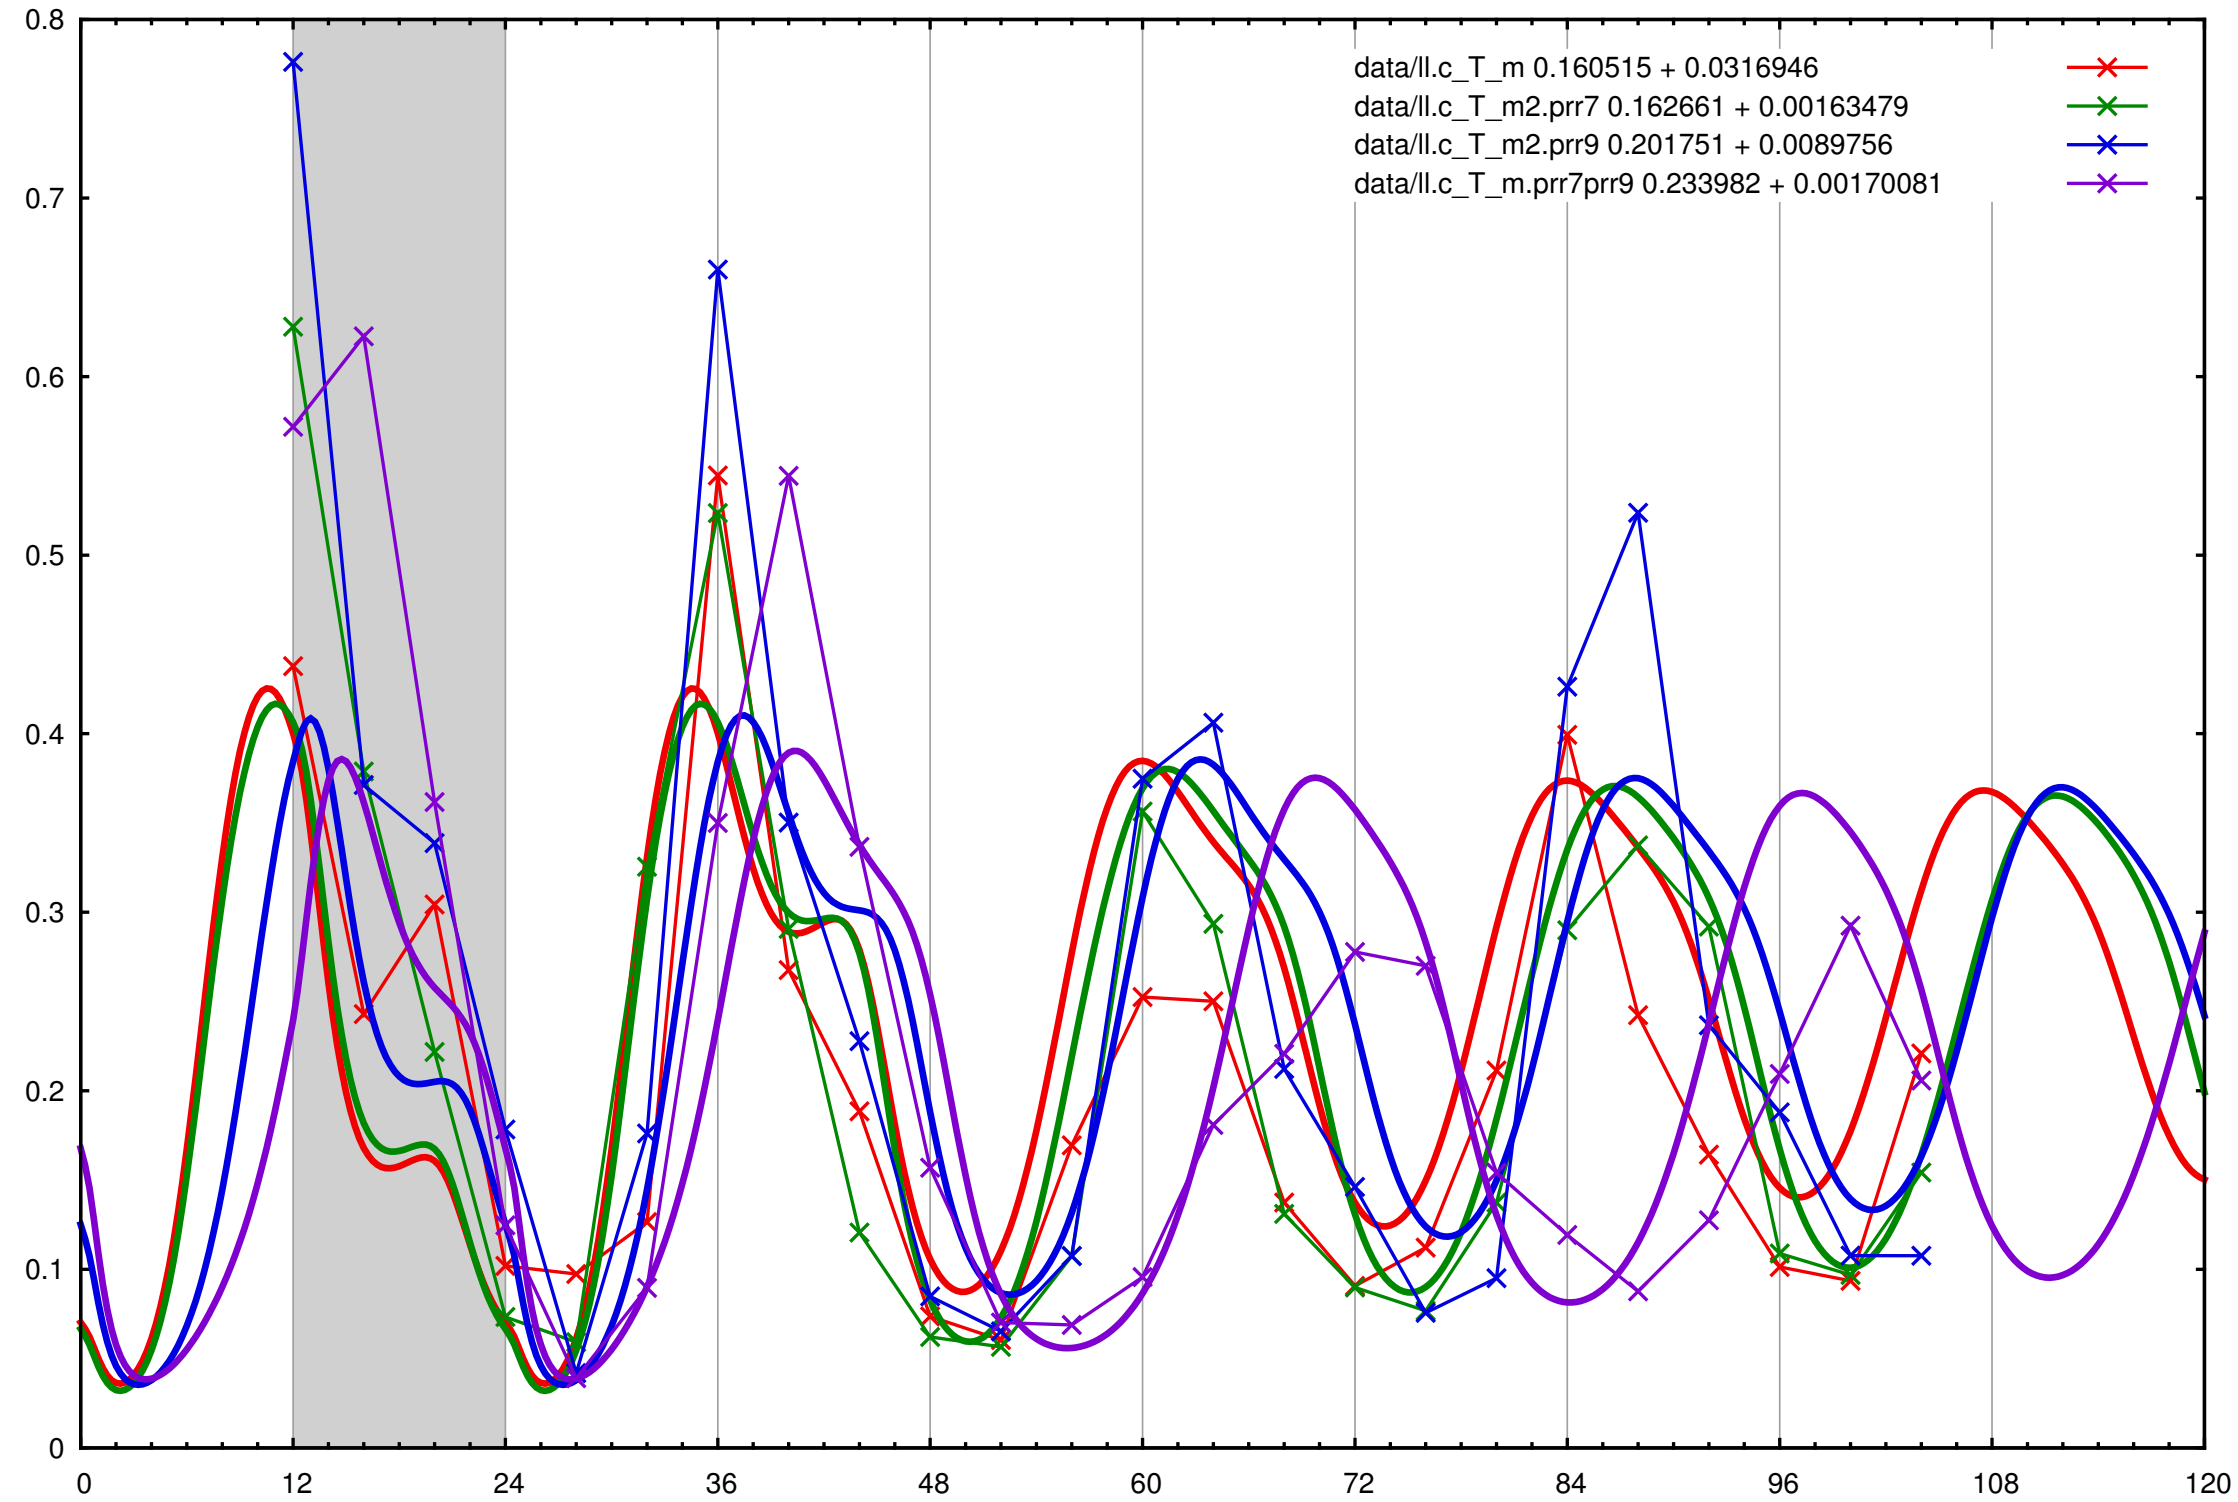

Scale group 6, scost 0.0130608

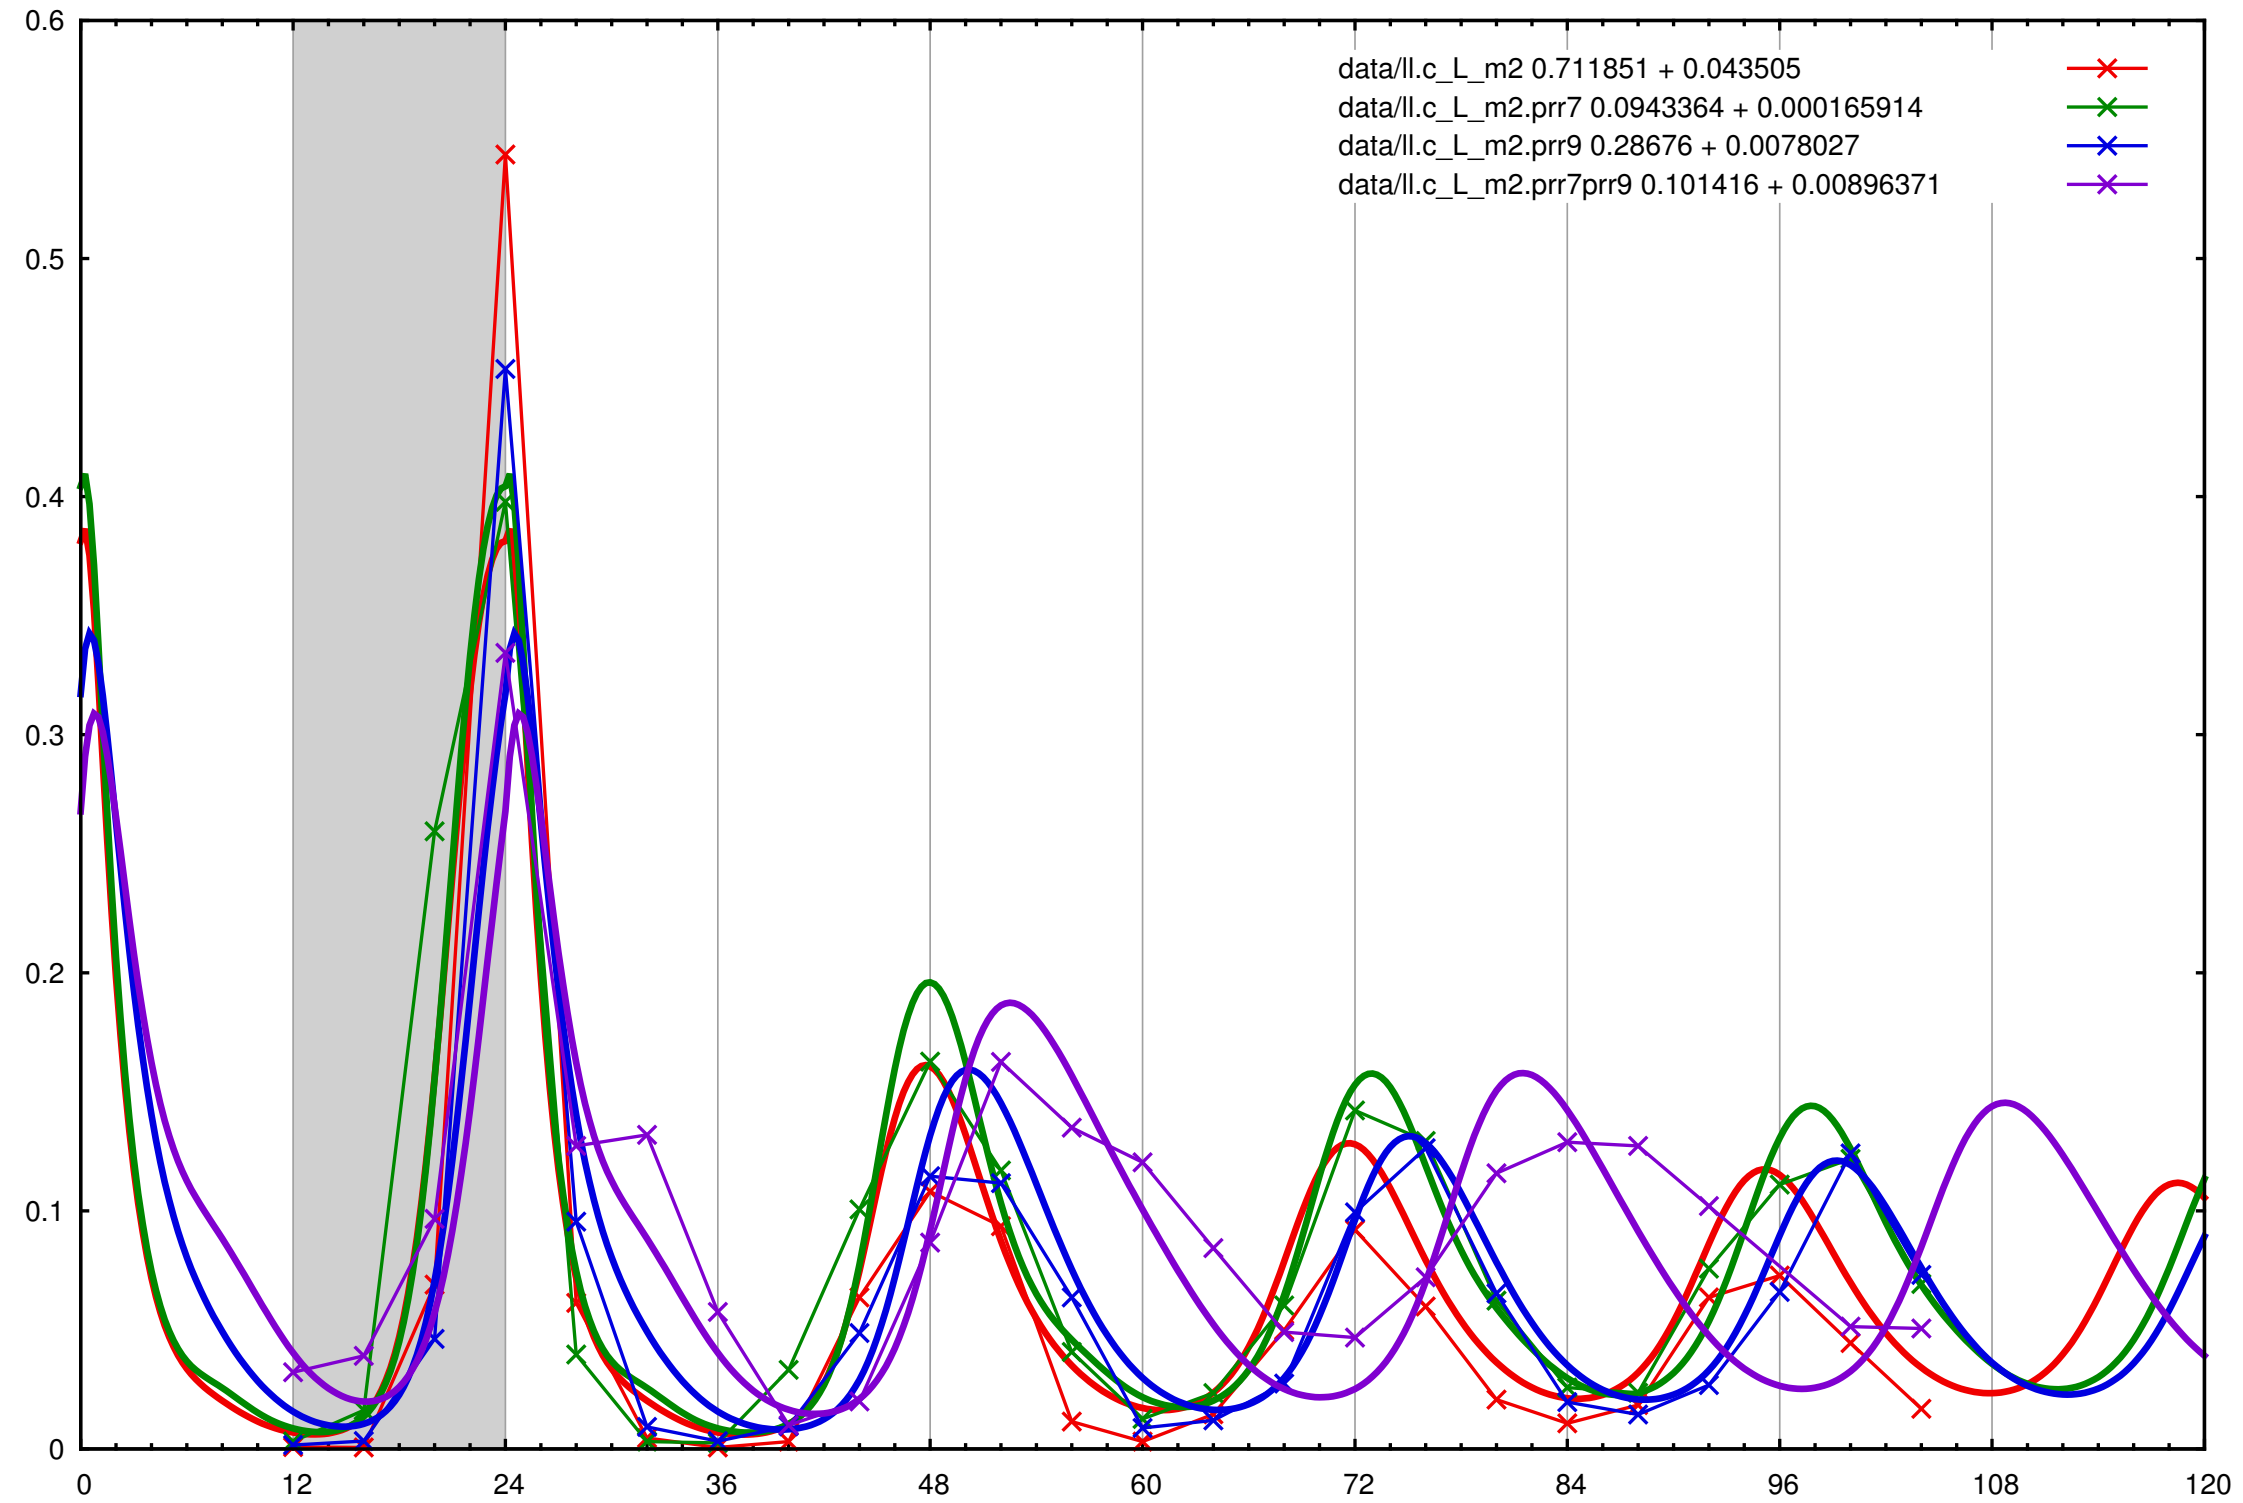

Scale group 7, scost 0.0132883

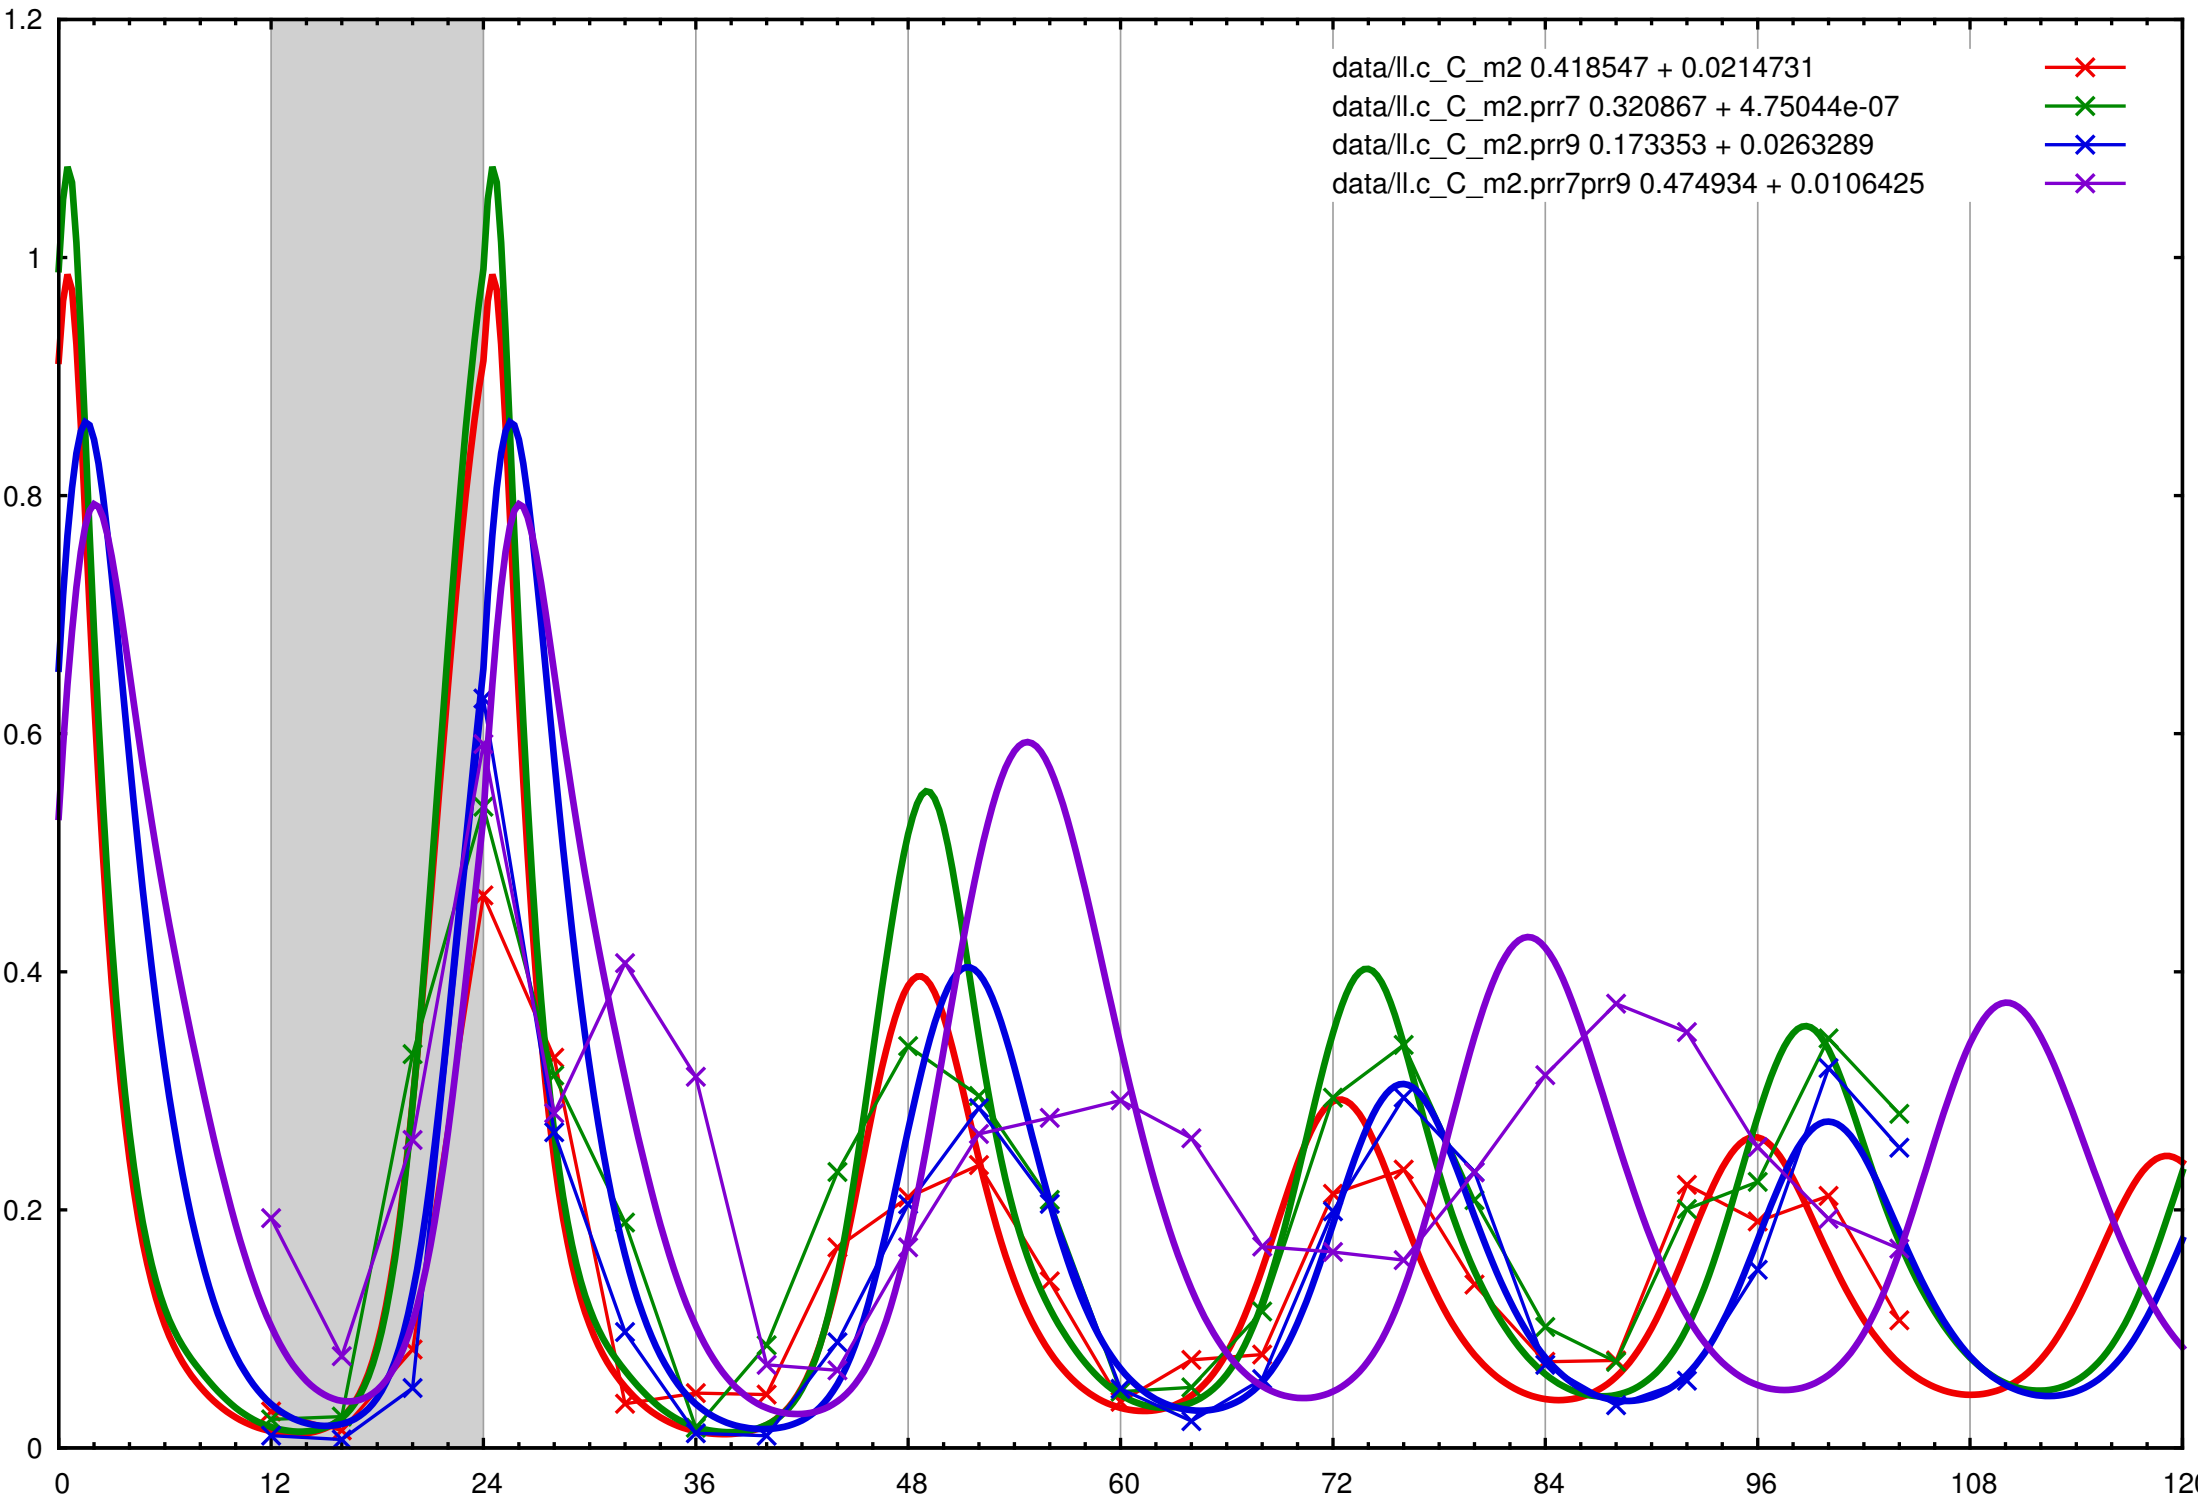

Scale group 8, scost 0.013258

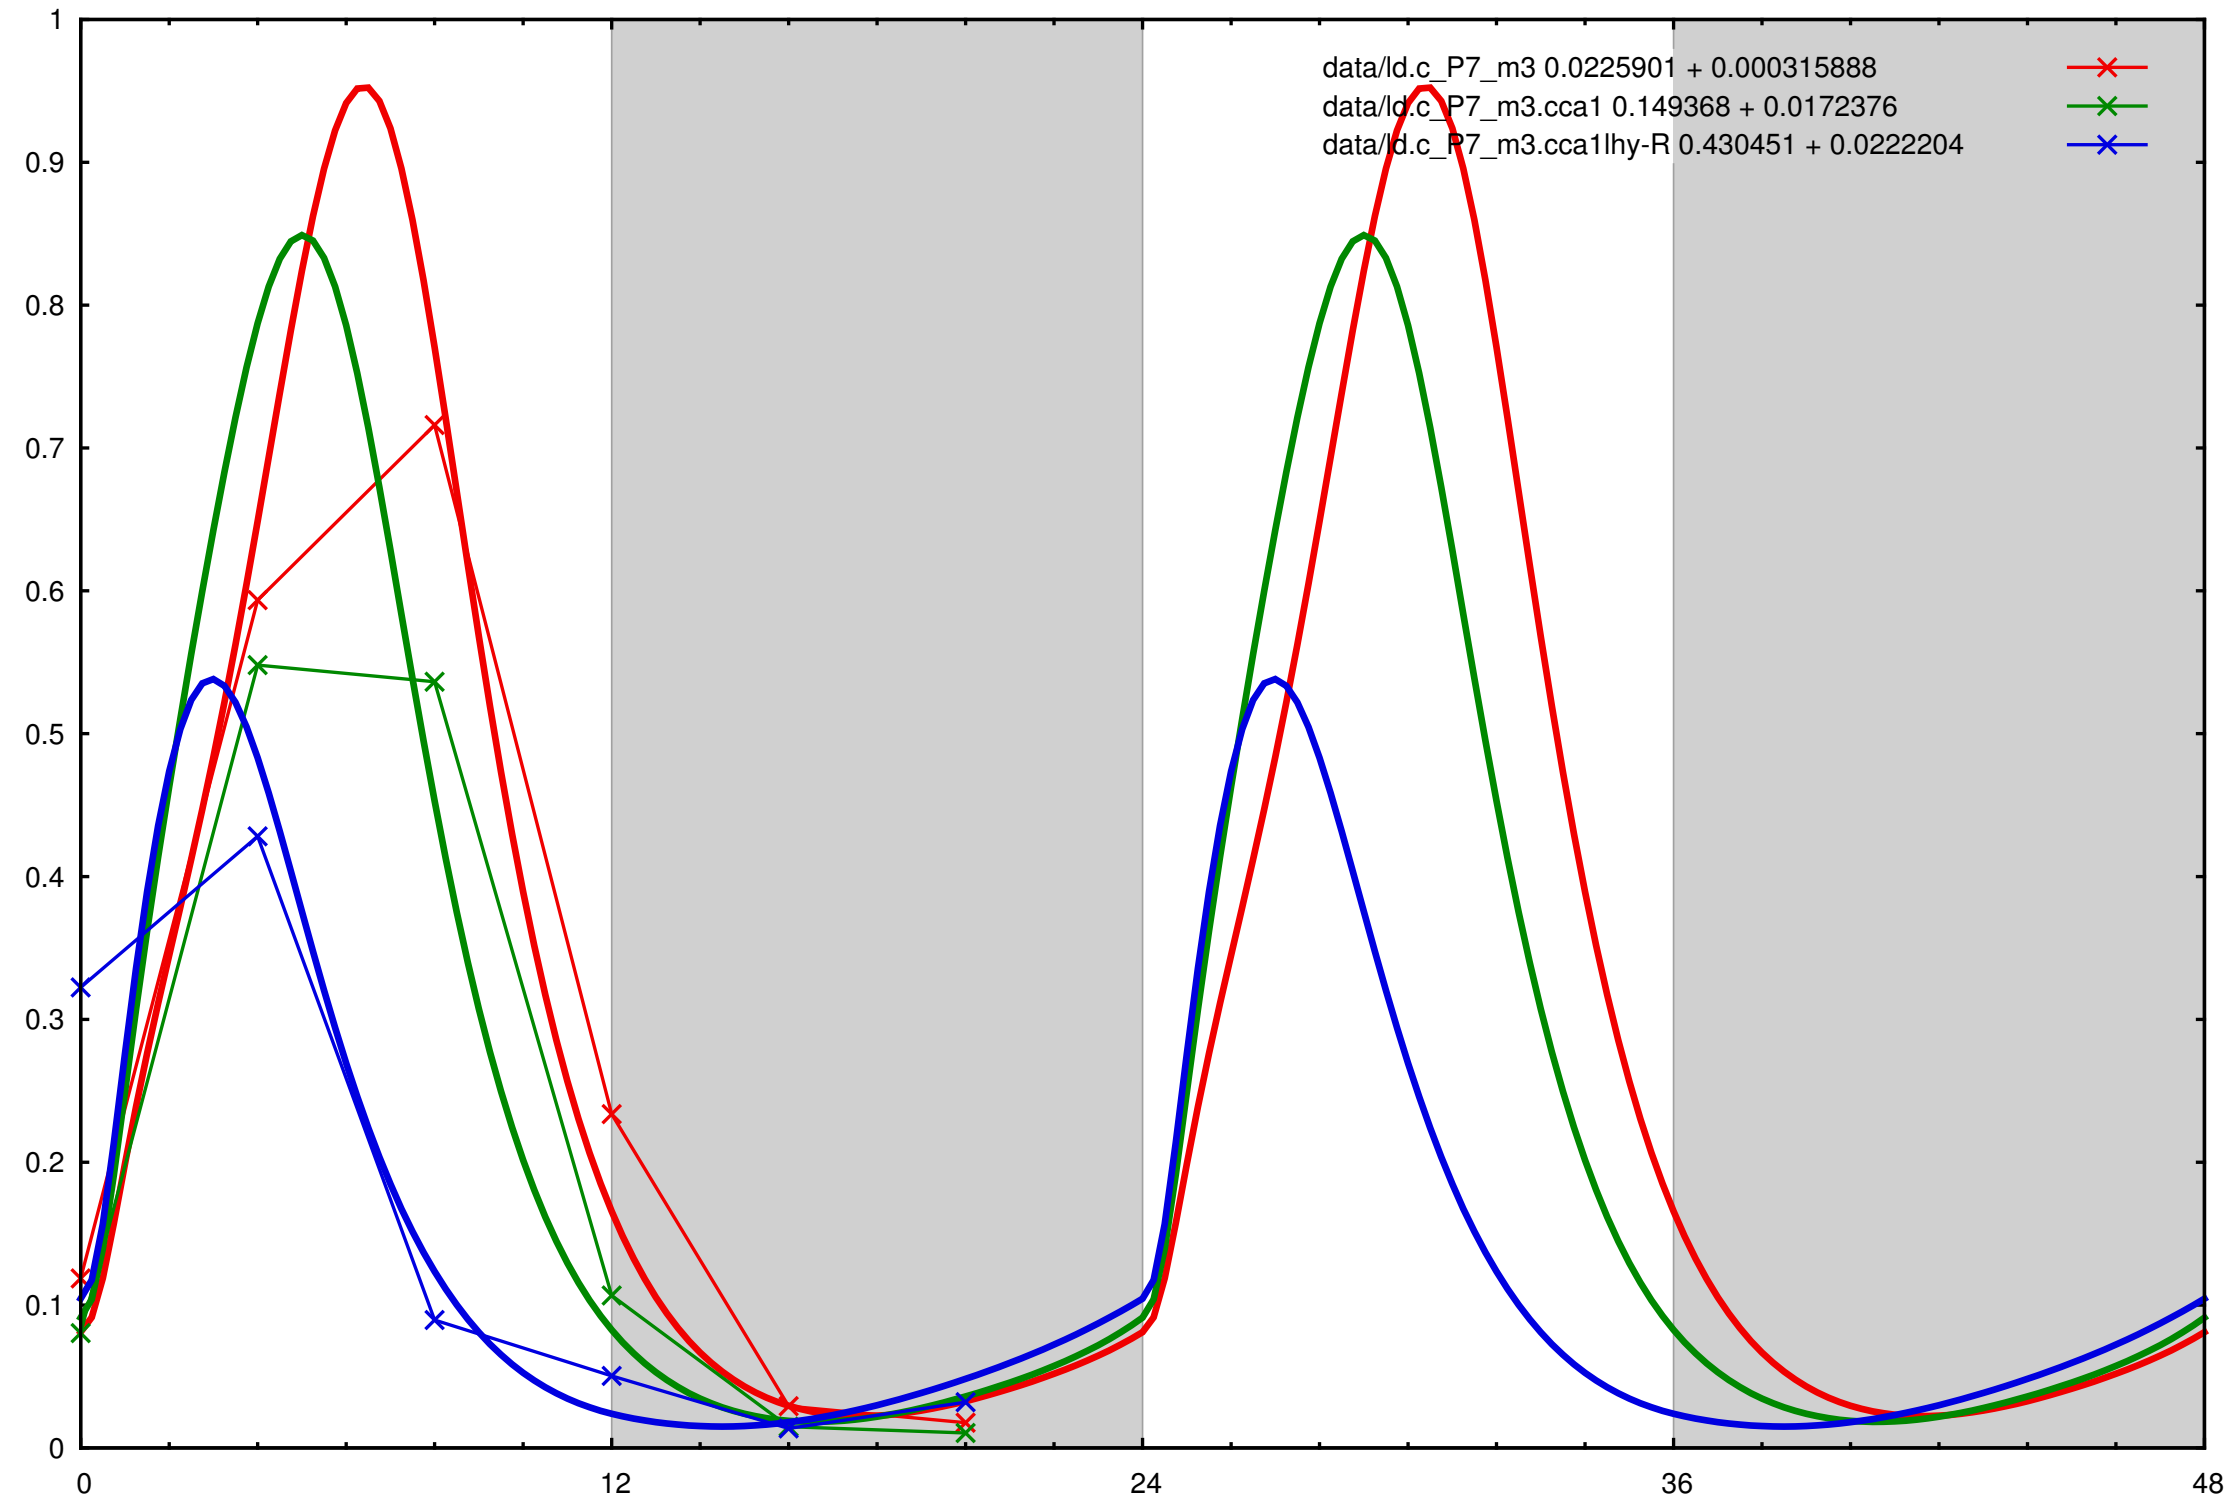



Scale group 9, scost 0.00723538

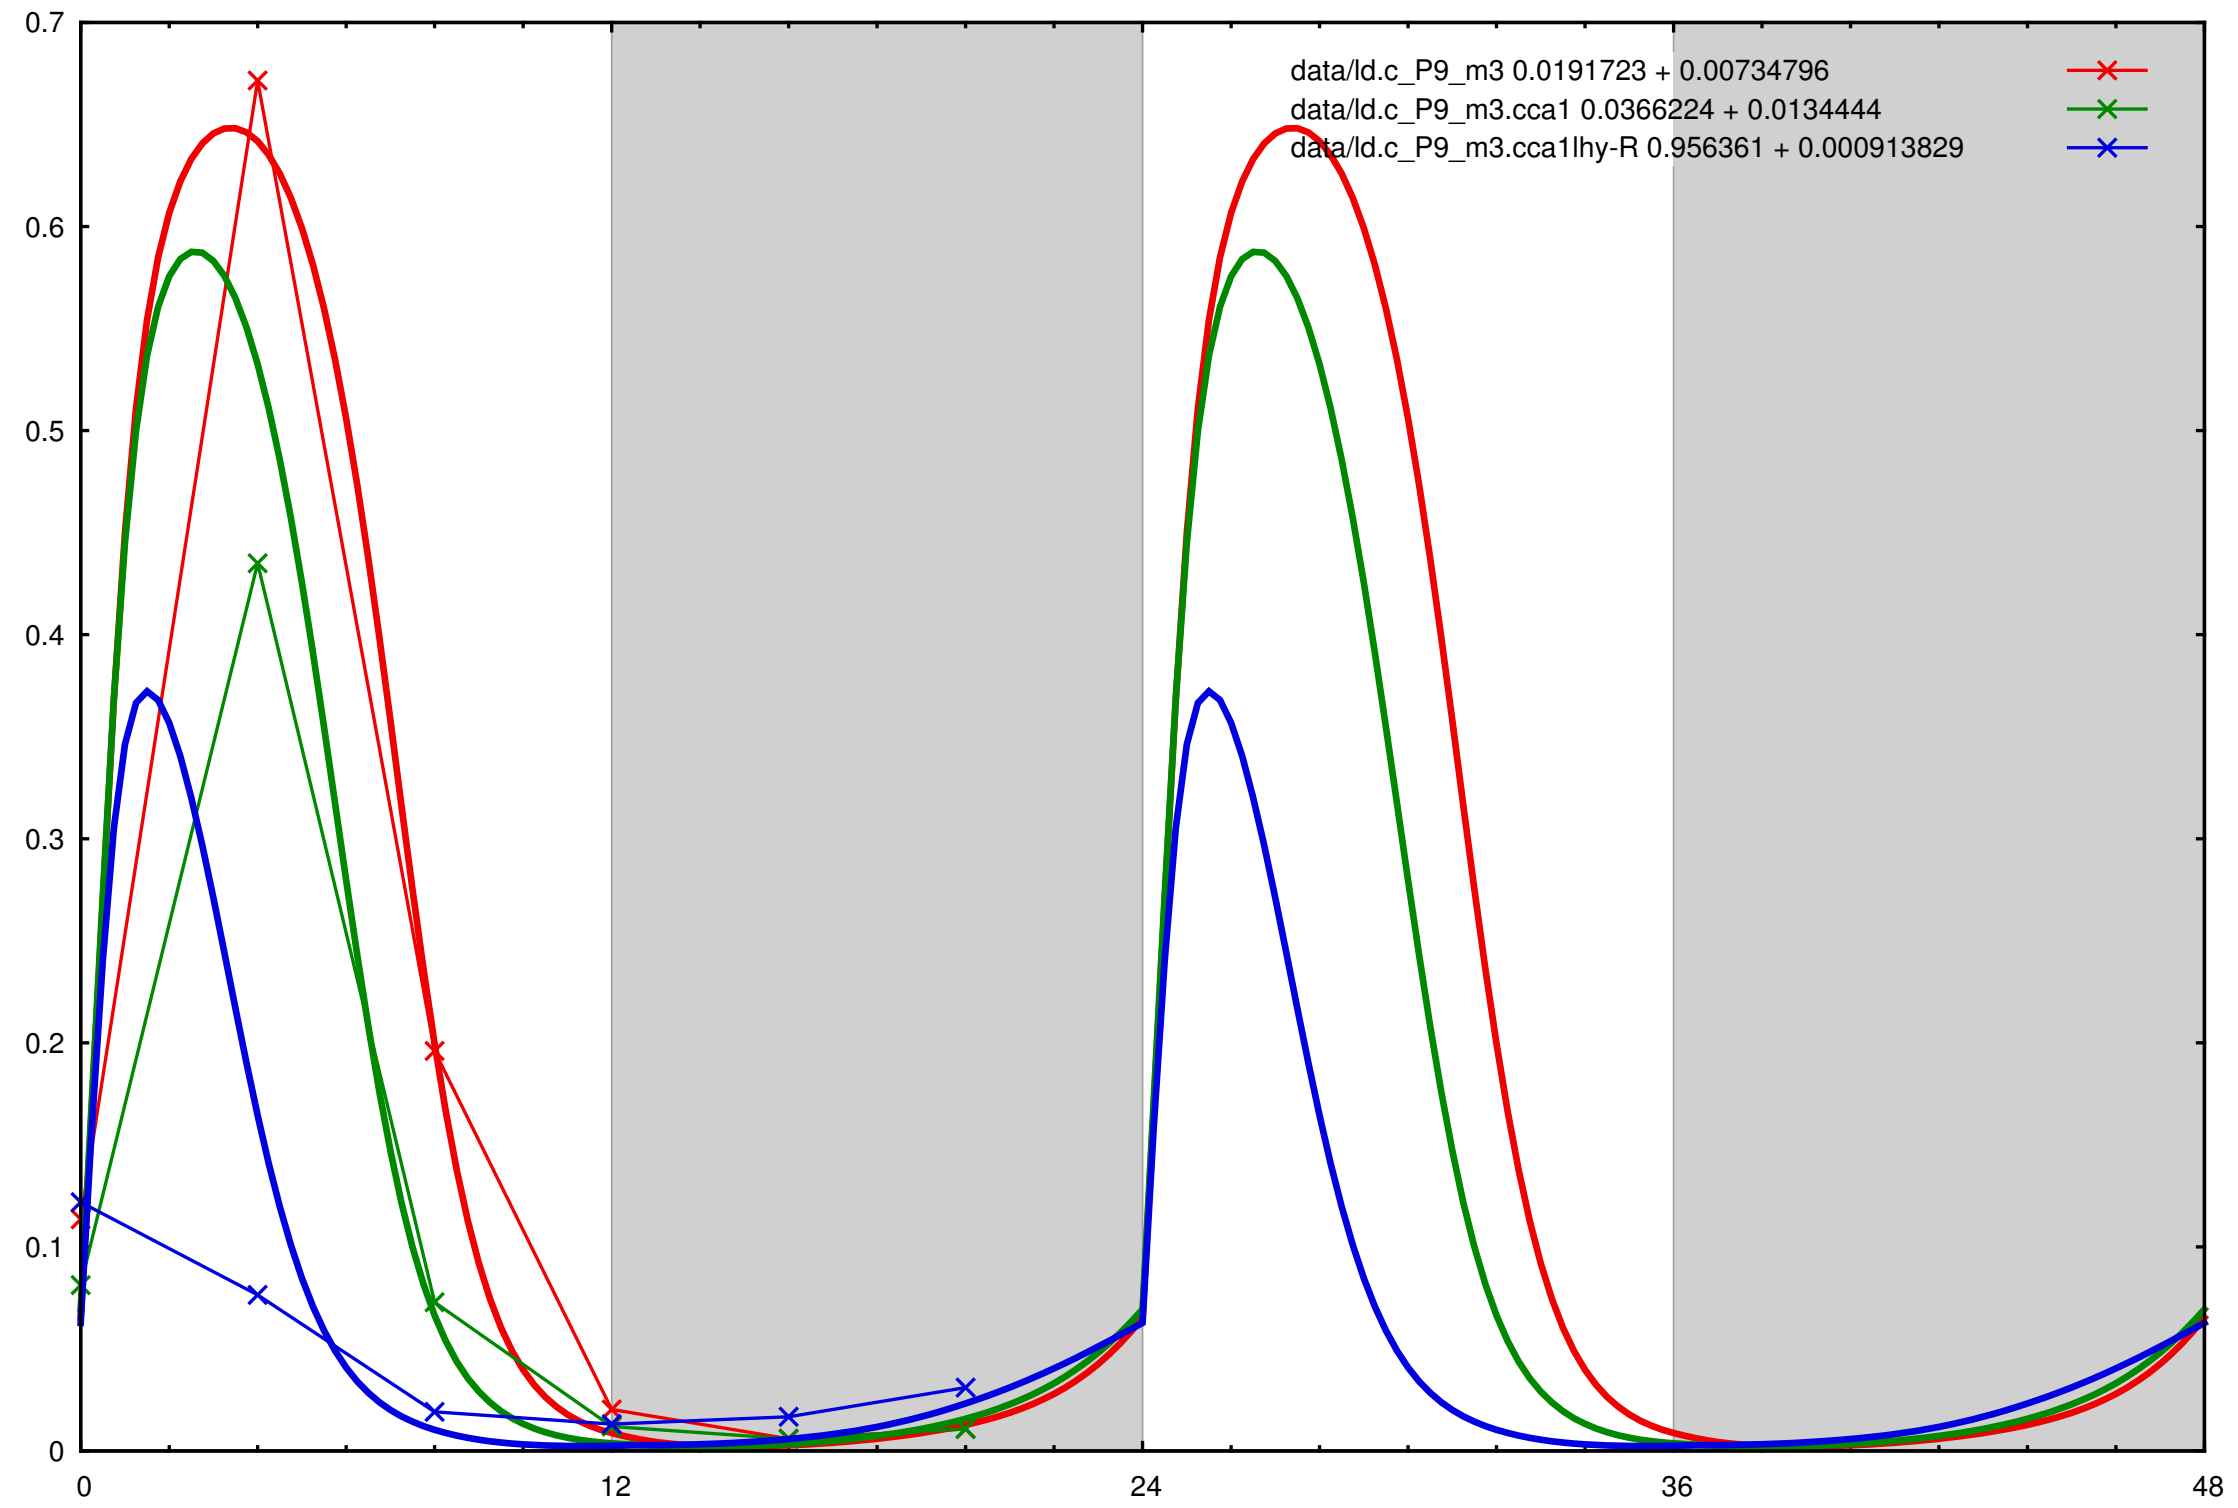

Scale group 10, scost 0.0270015

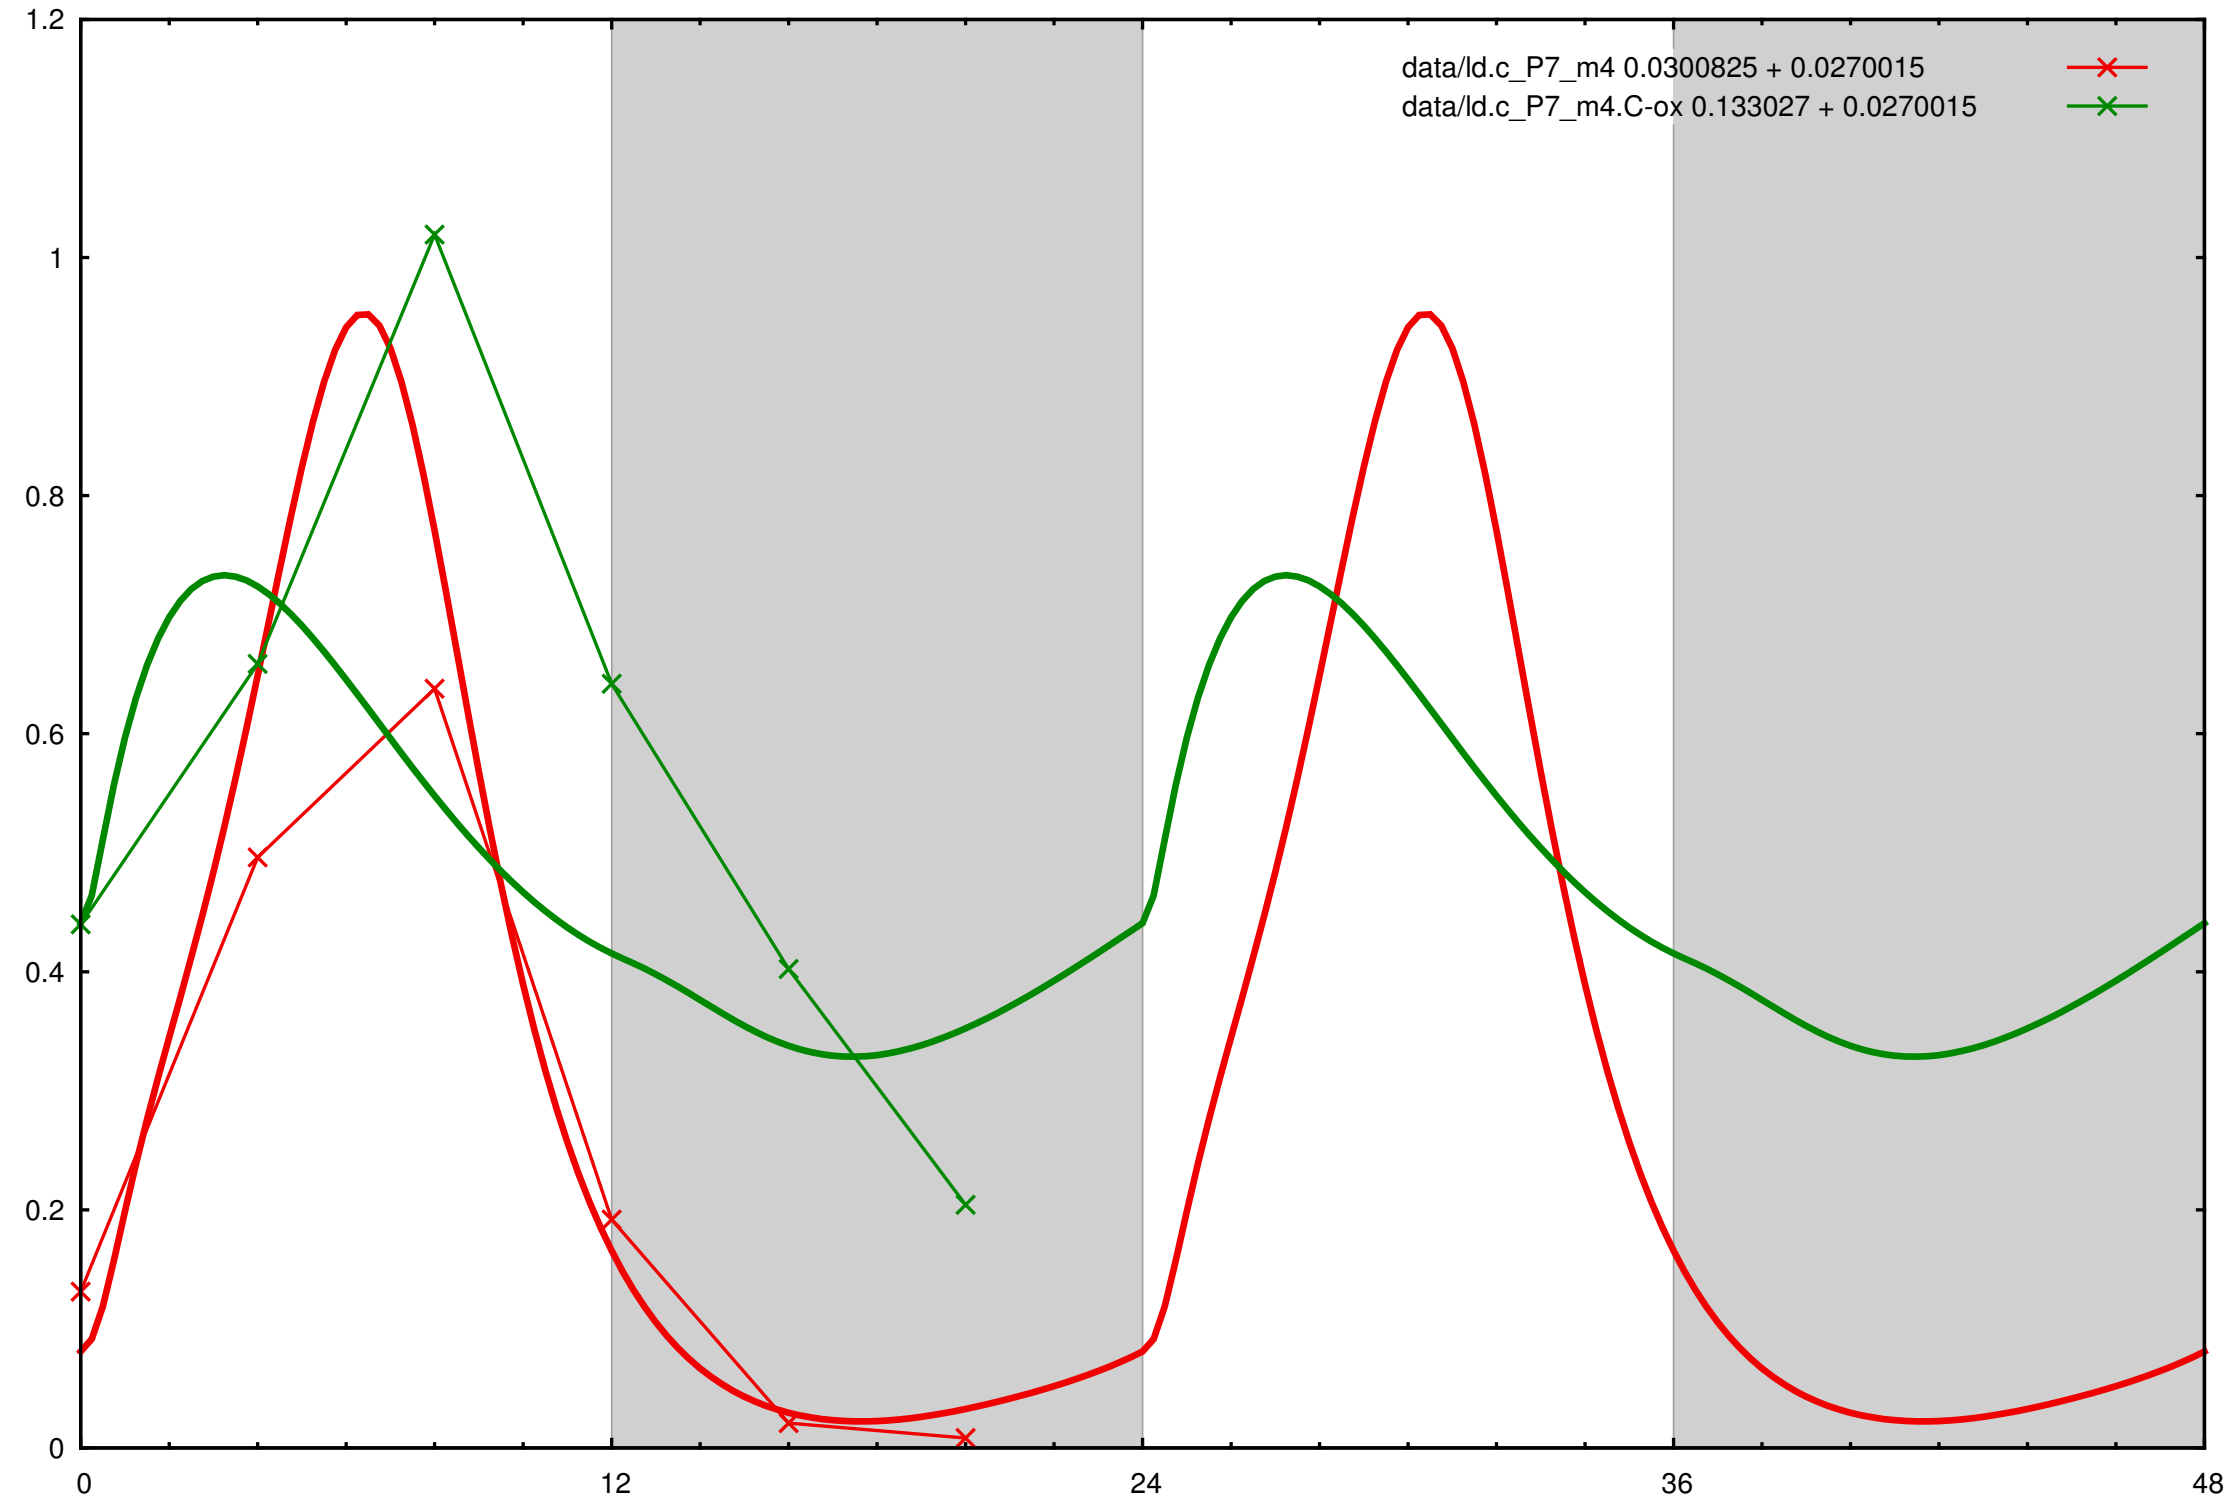

Scale group 11, scost 0.109516

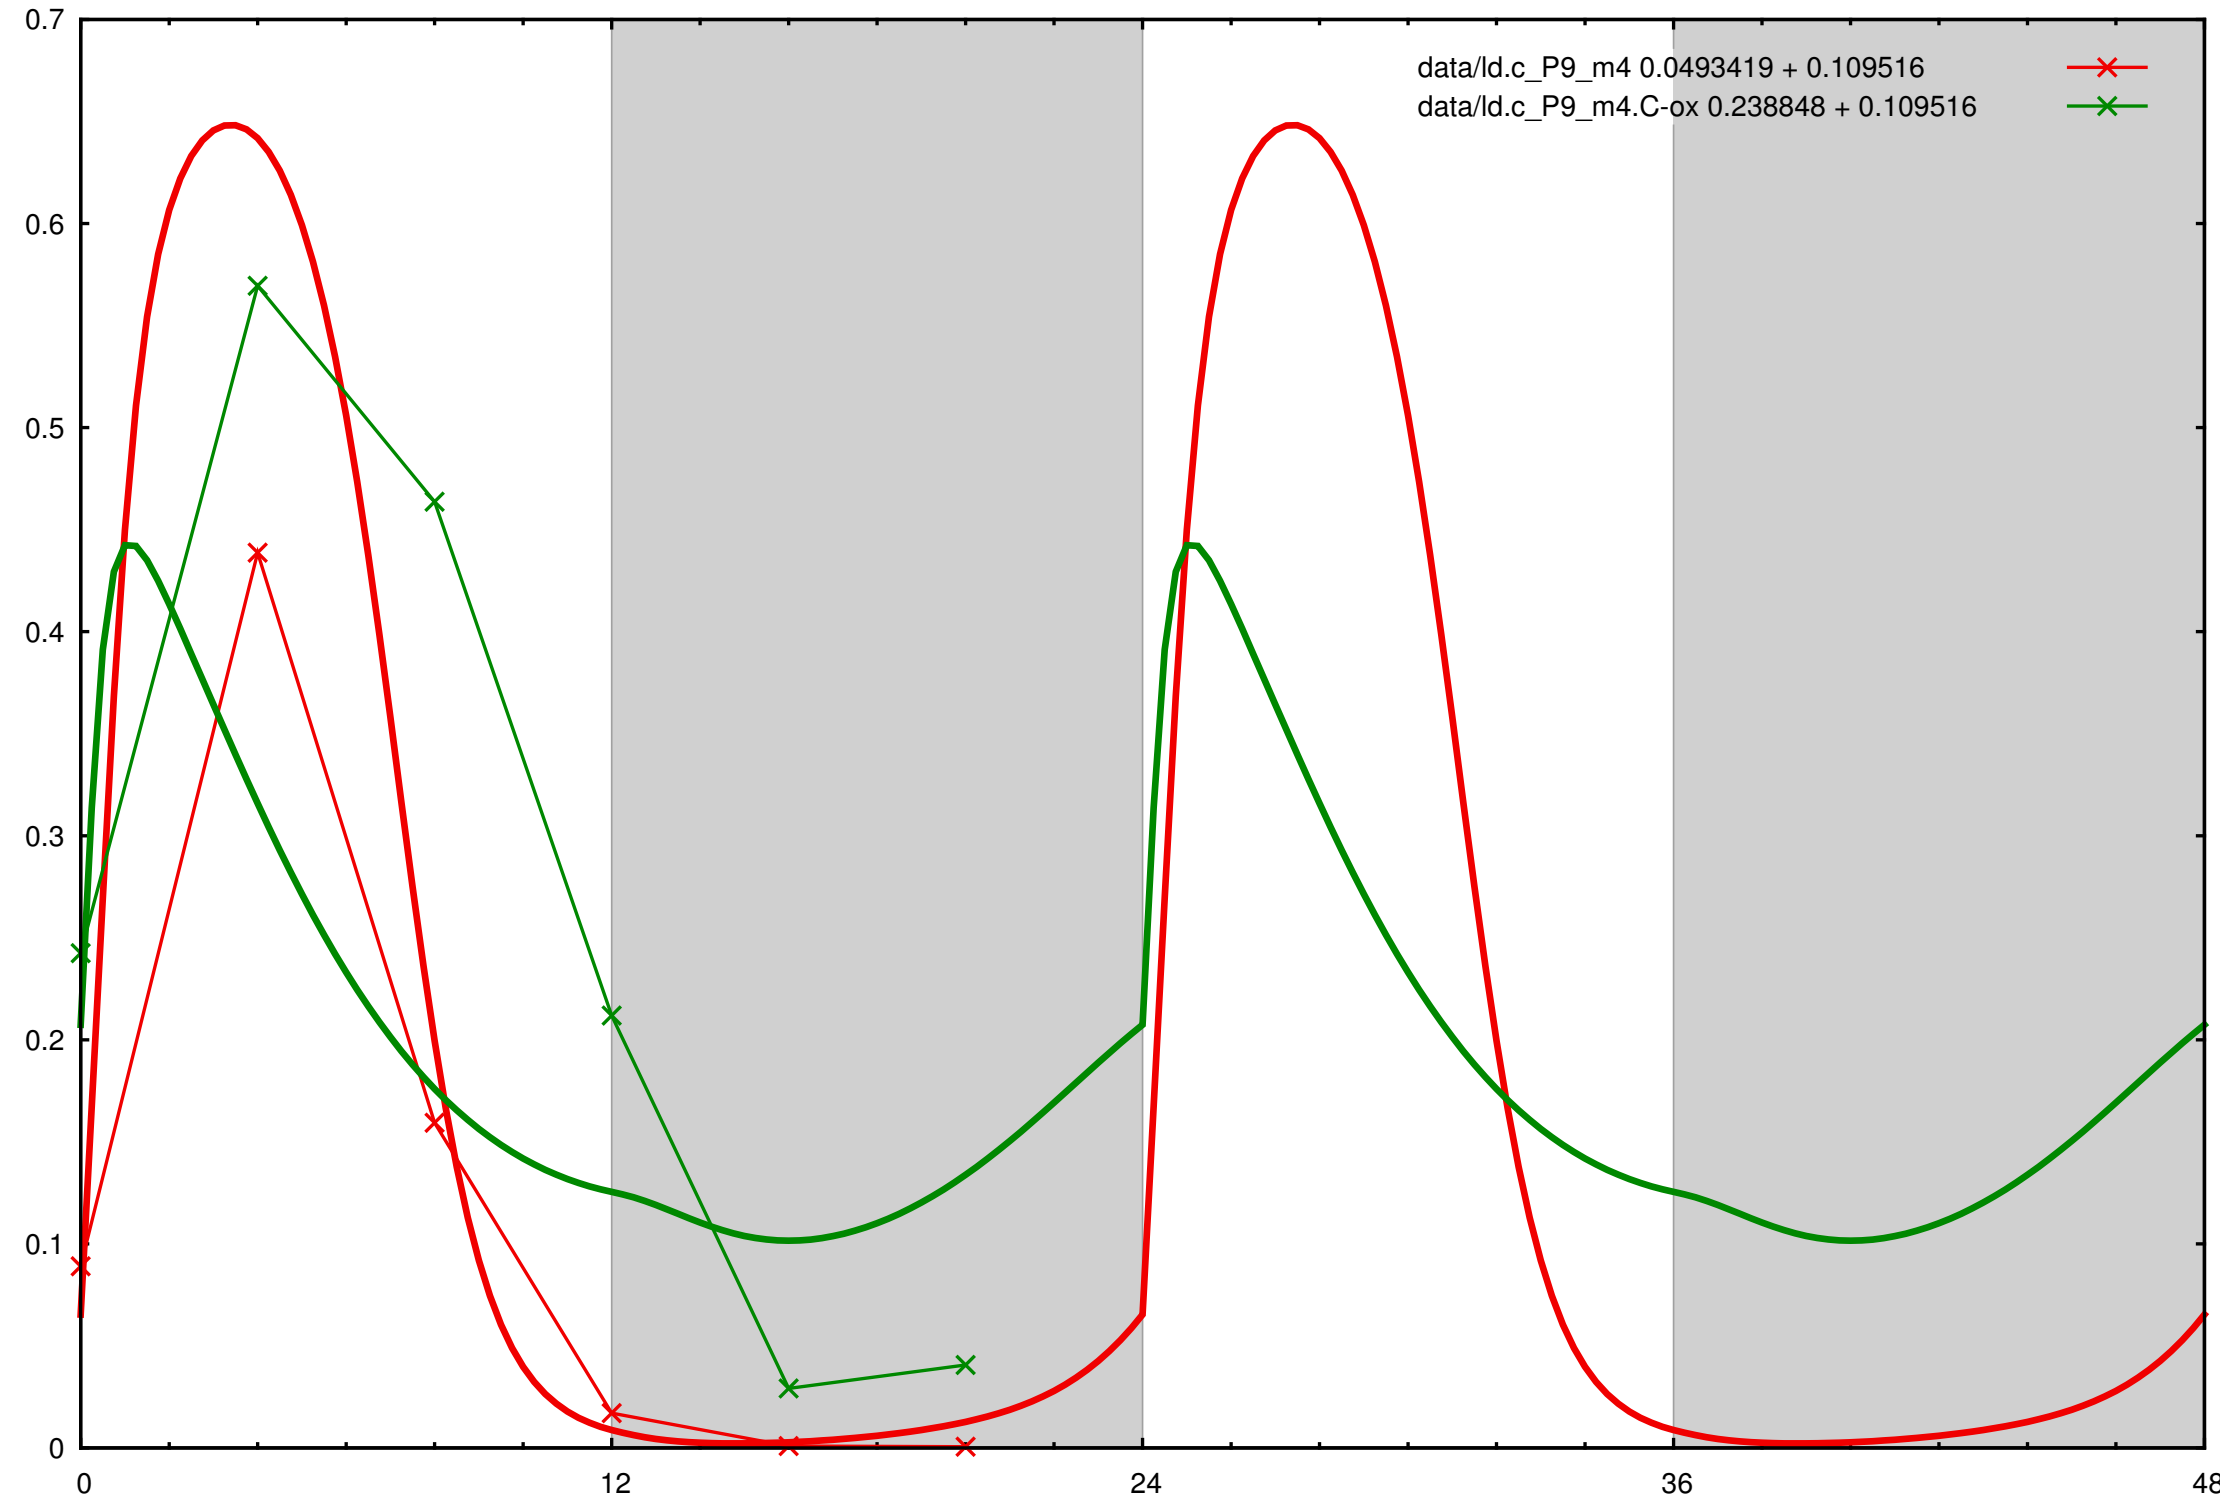

Scale group 12, scost 1.14337e-05

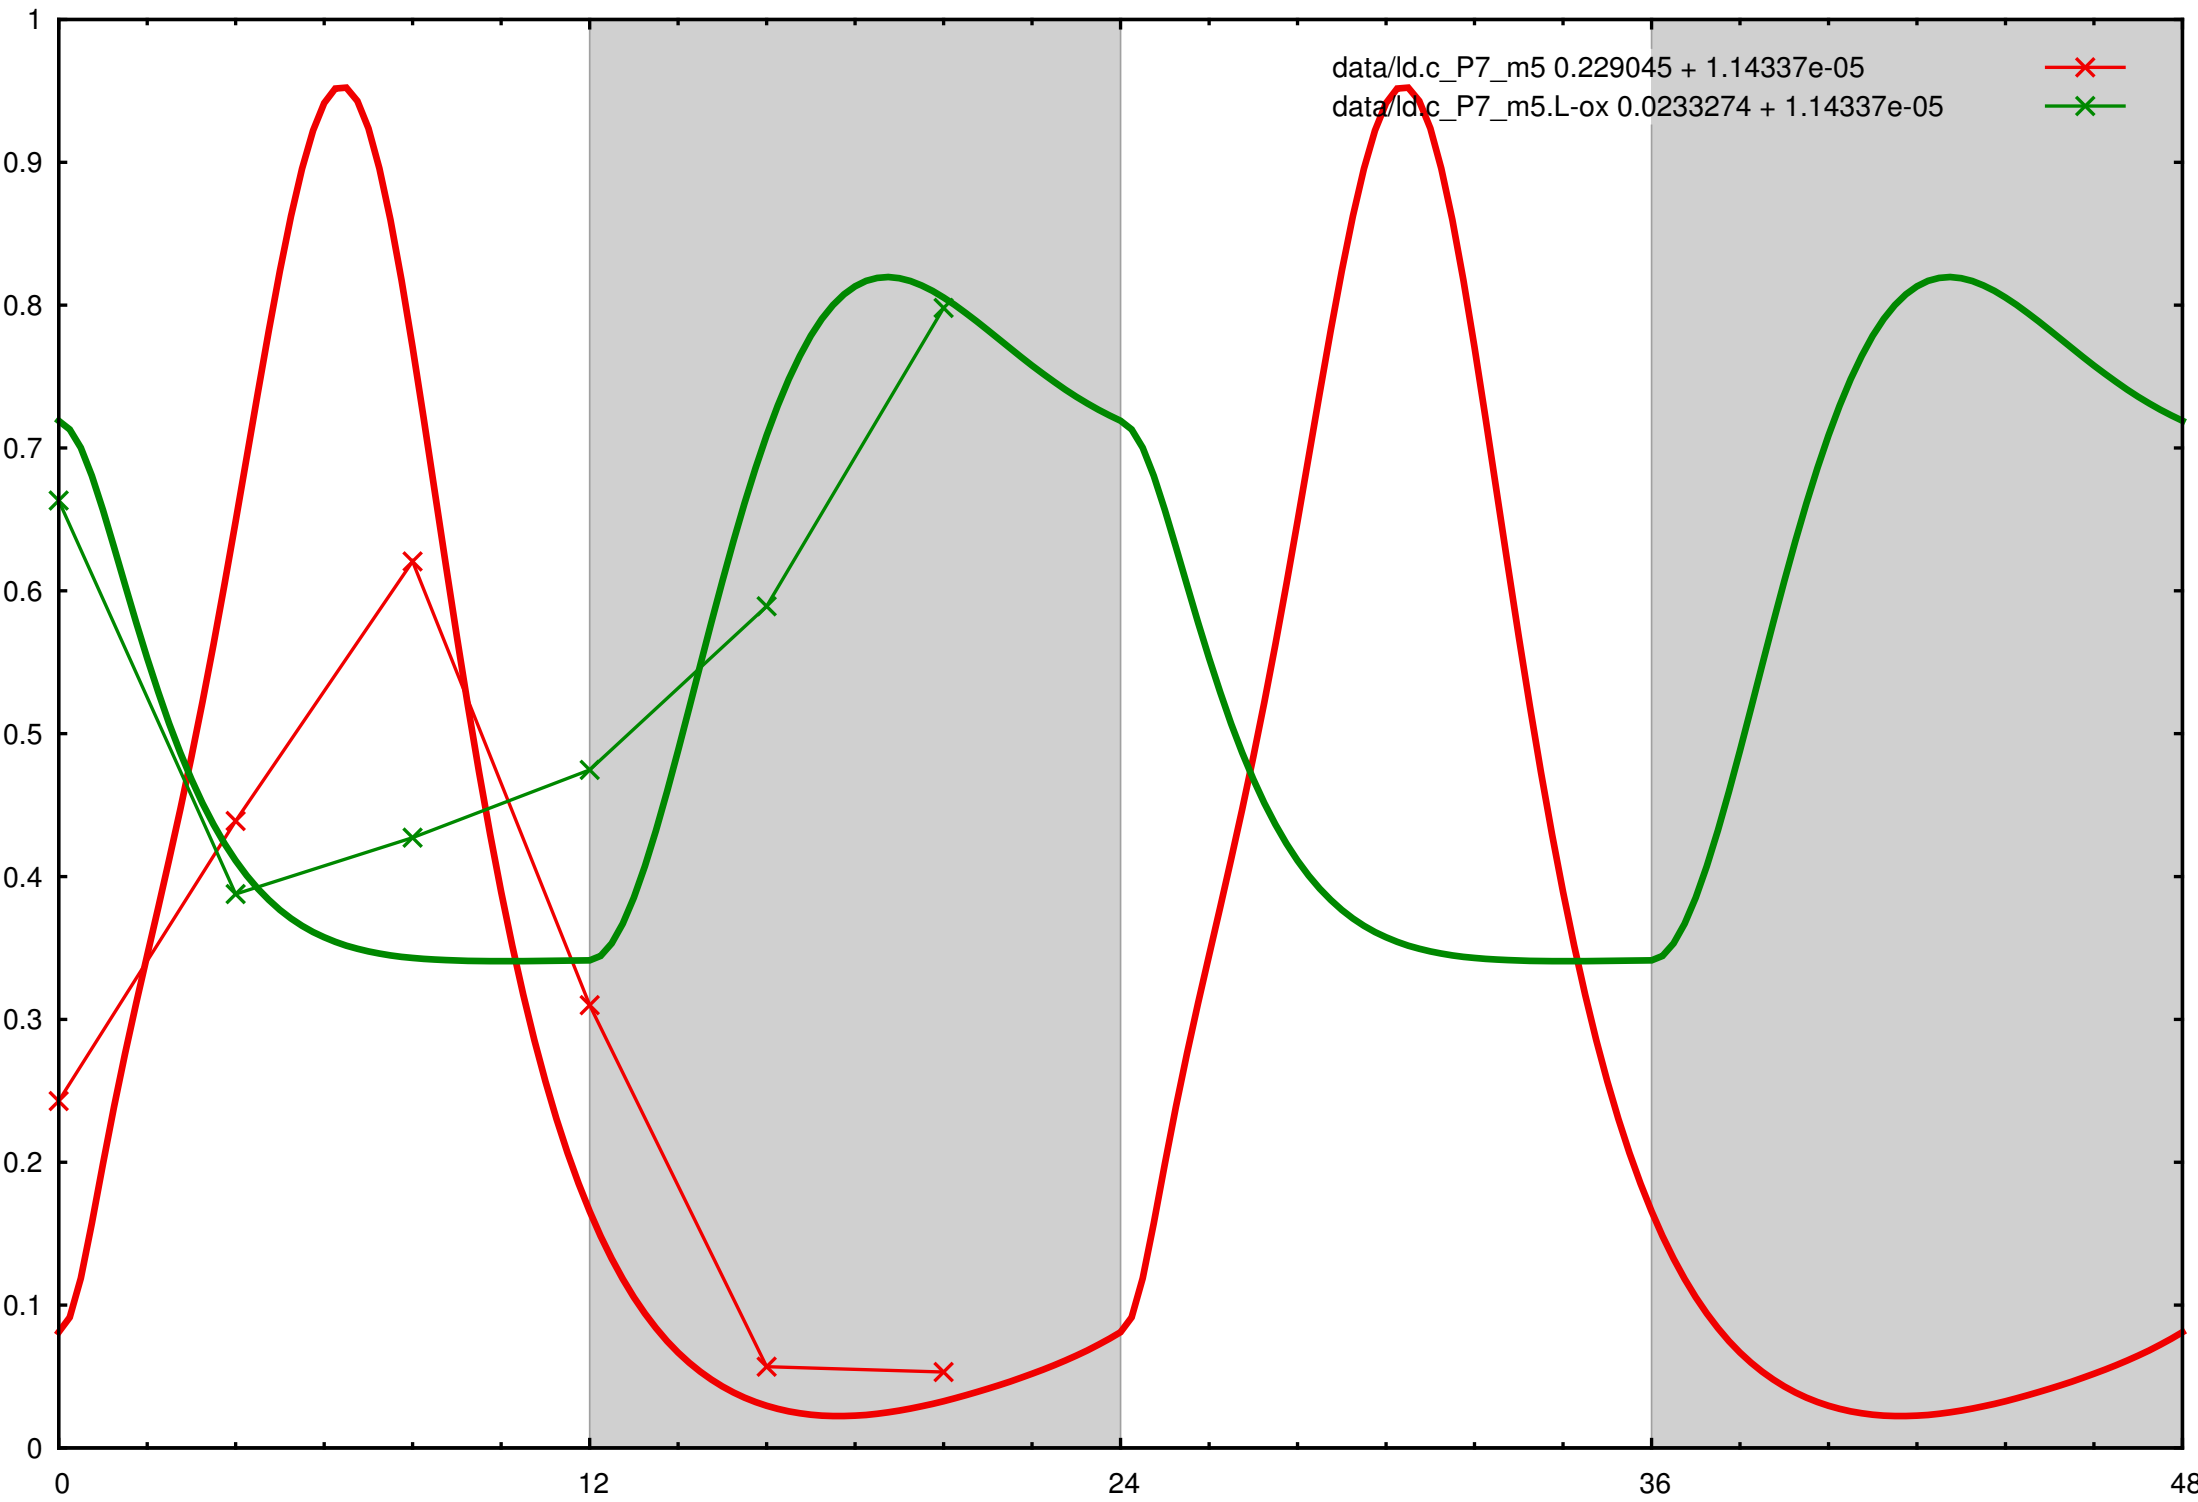

Scale group 13, scost 0.0648493

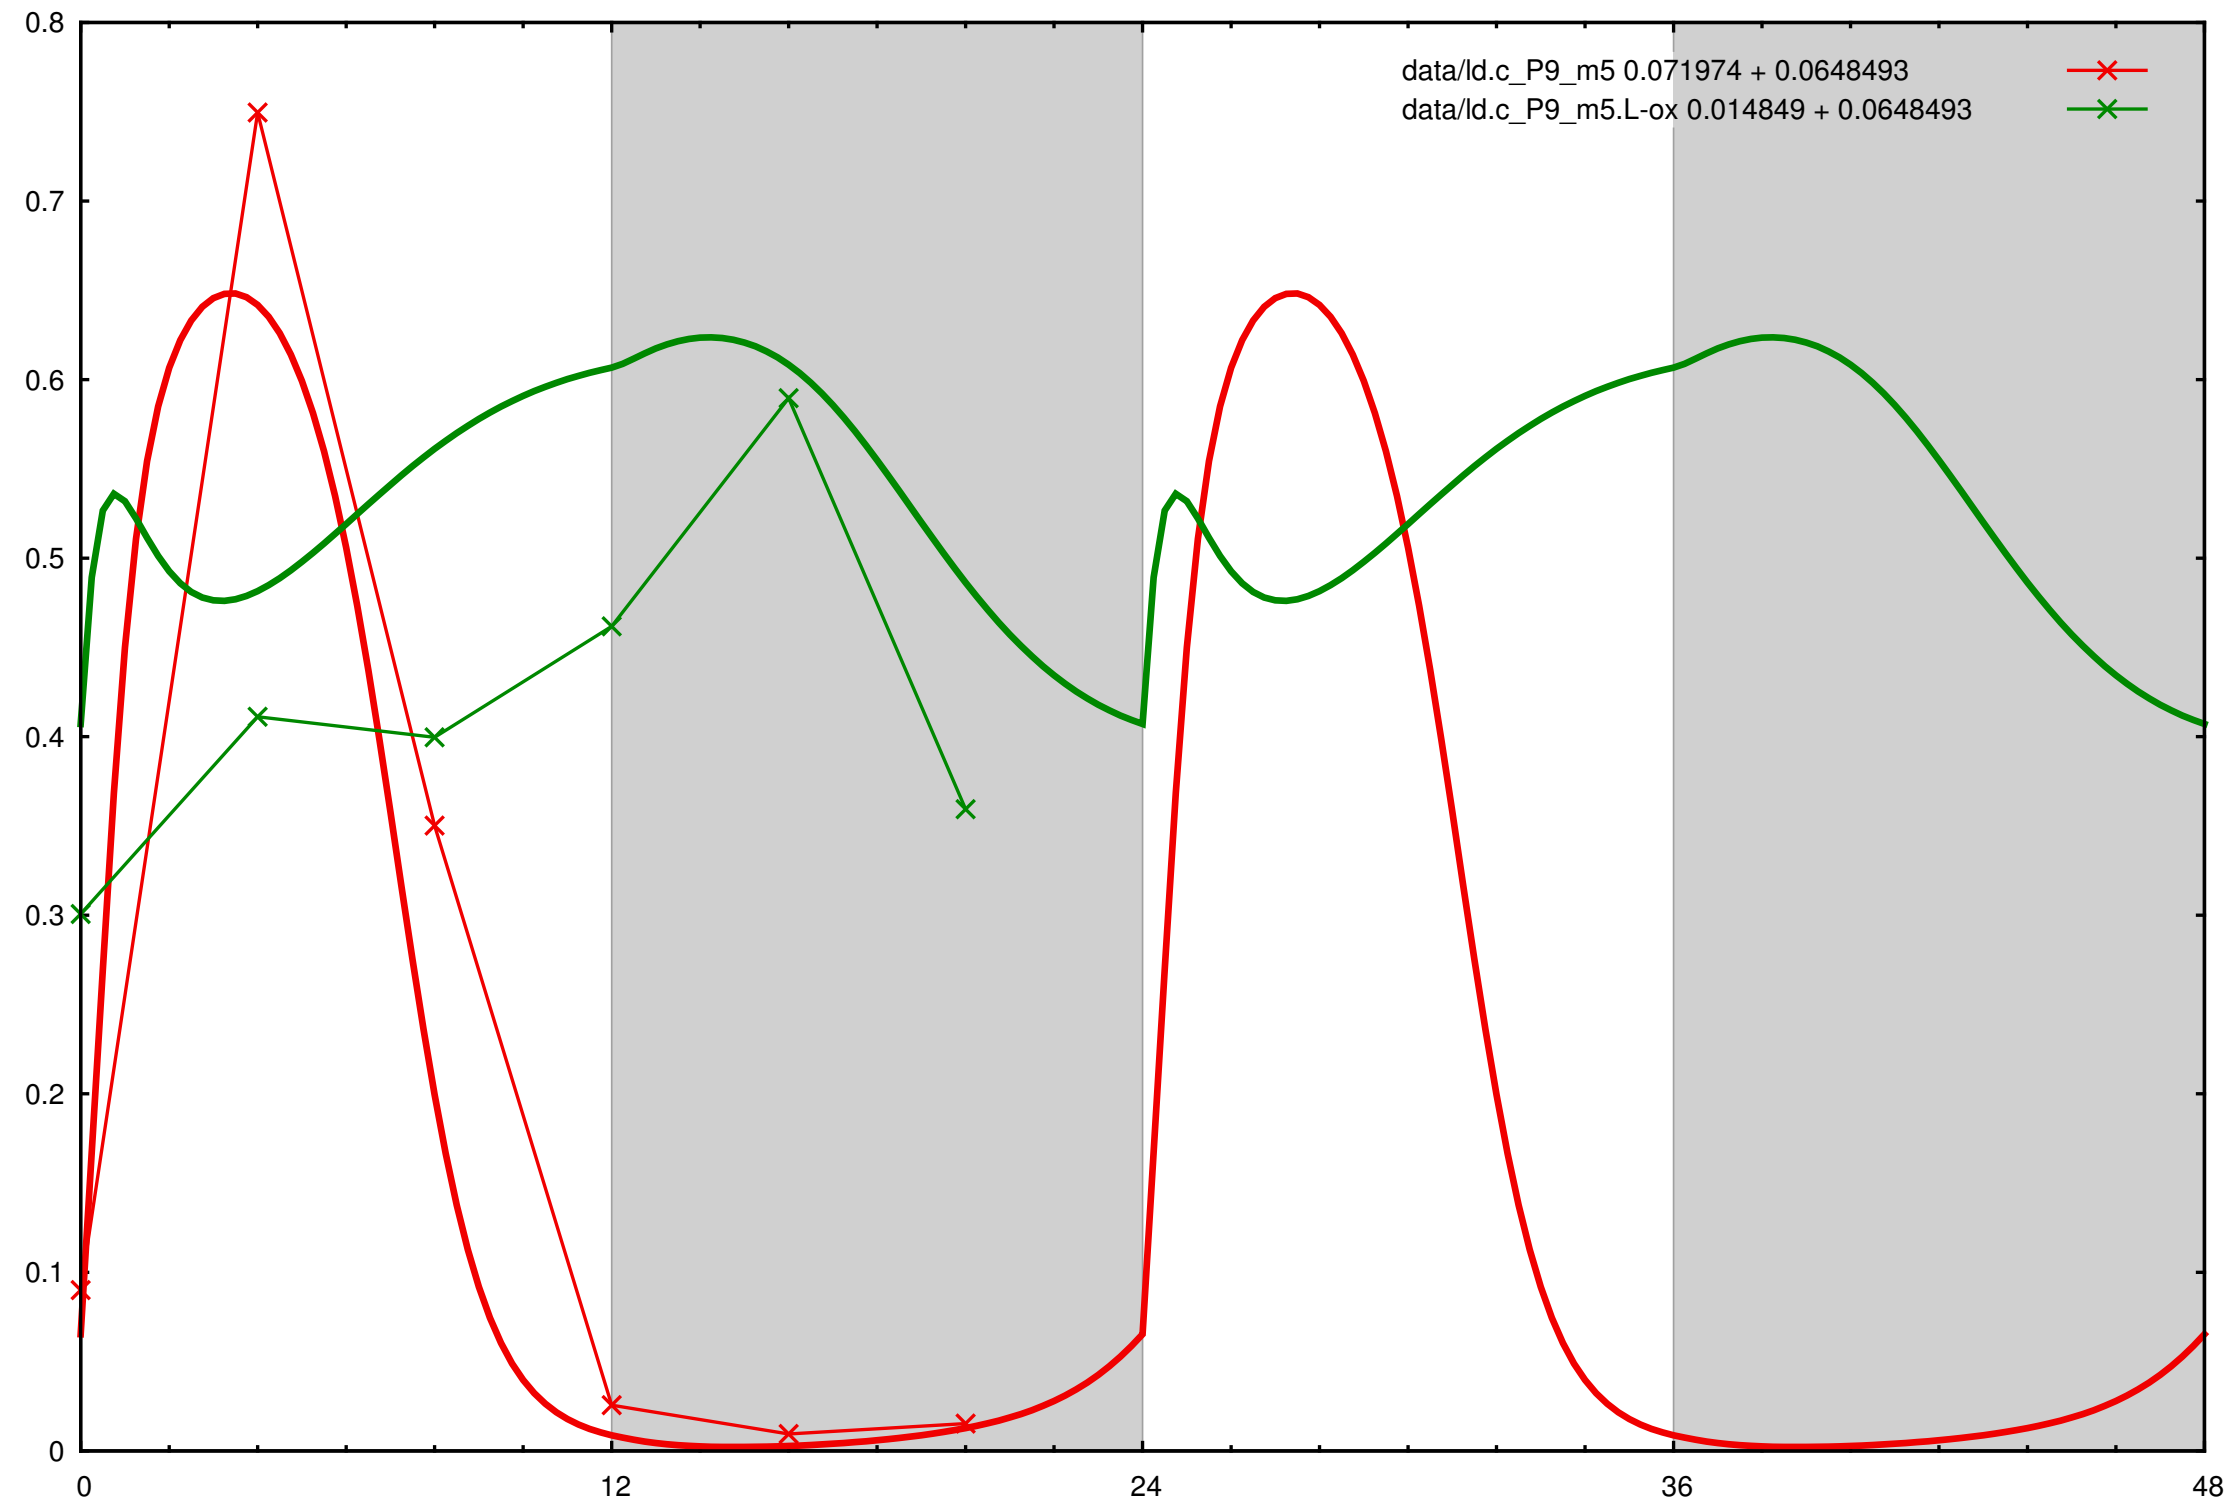

Scale group 14, scost 0.0281447

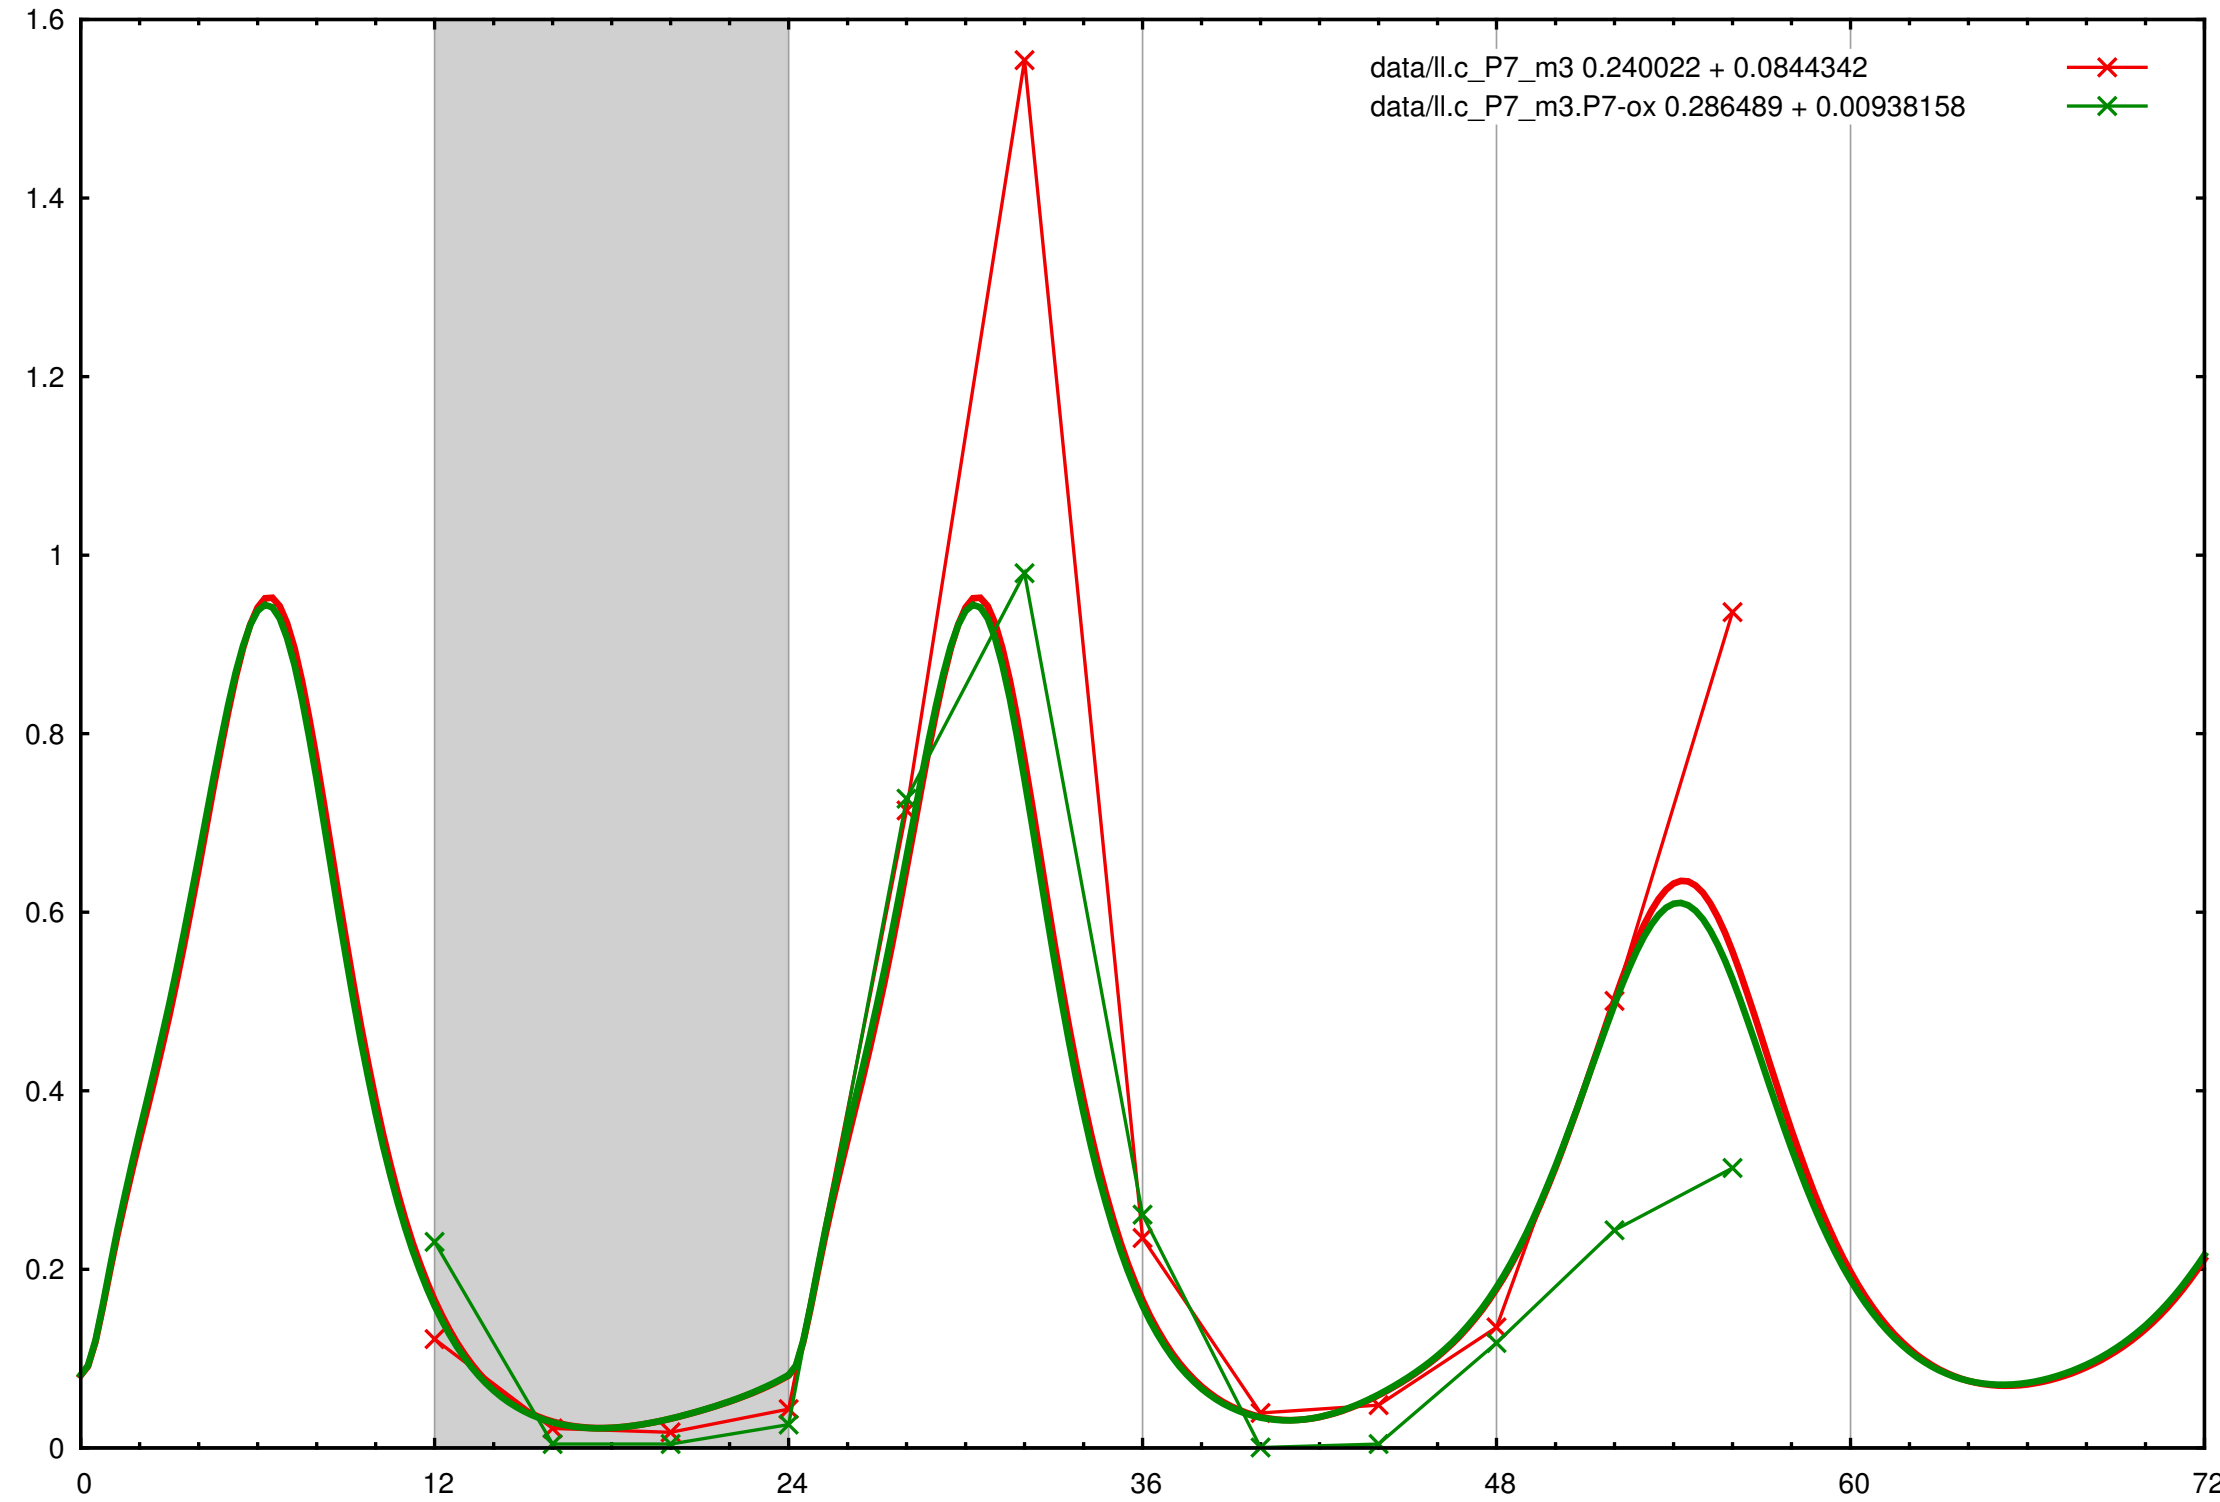

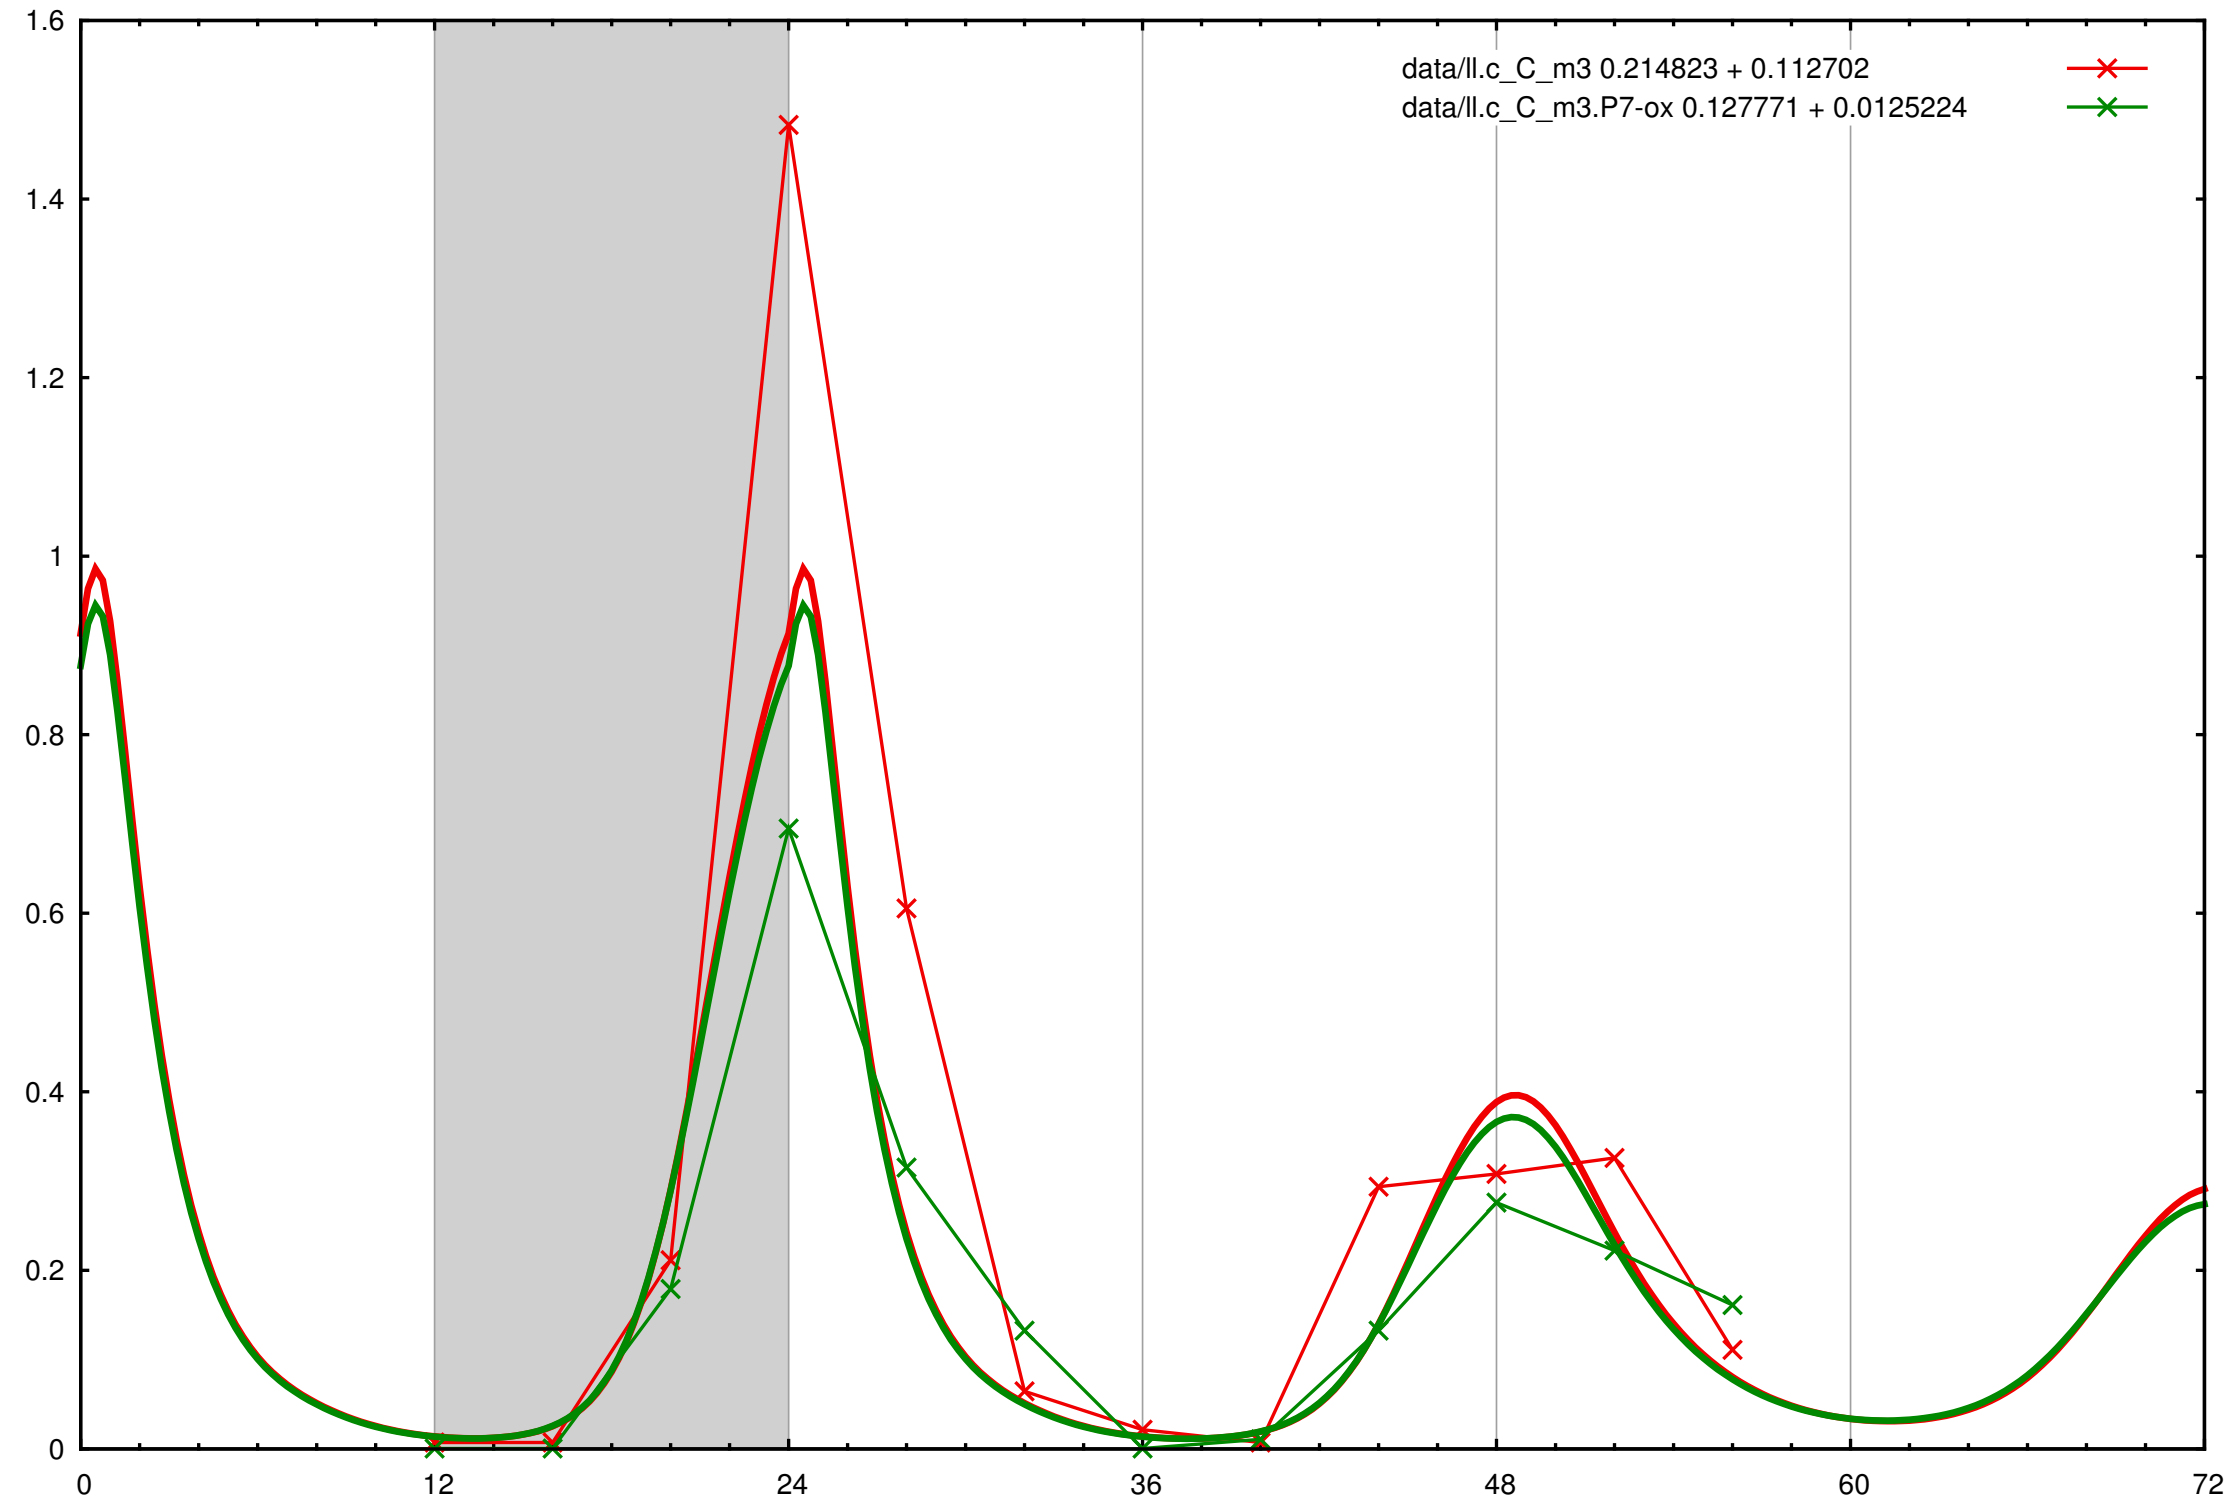

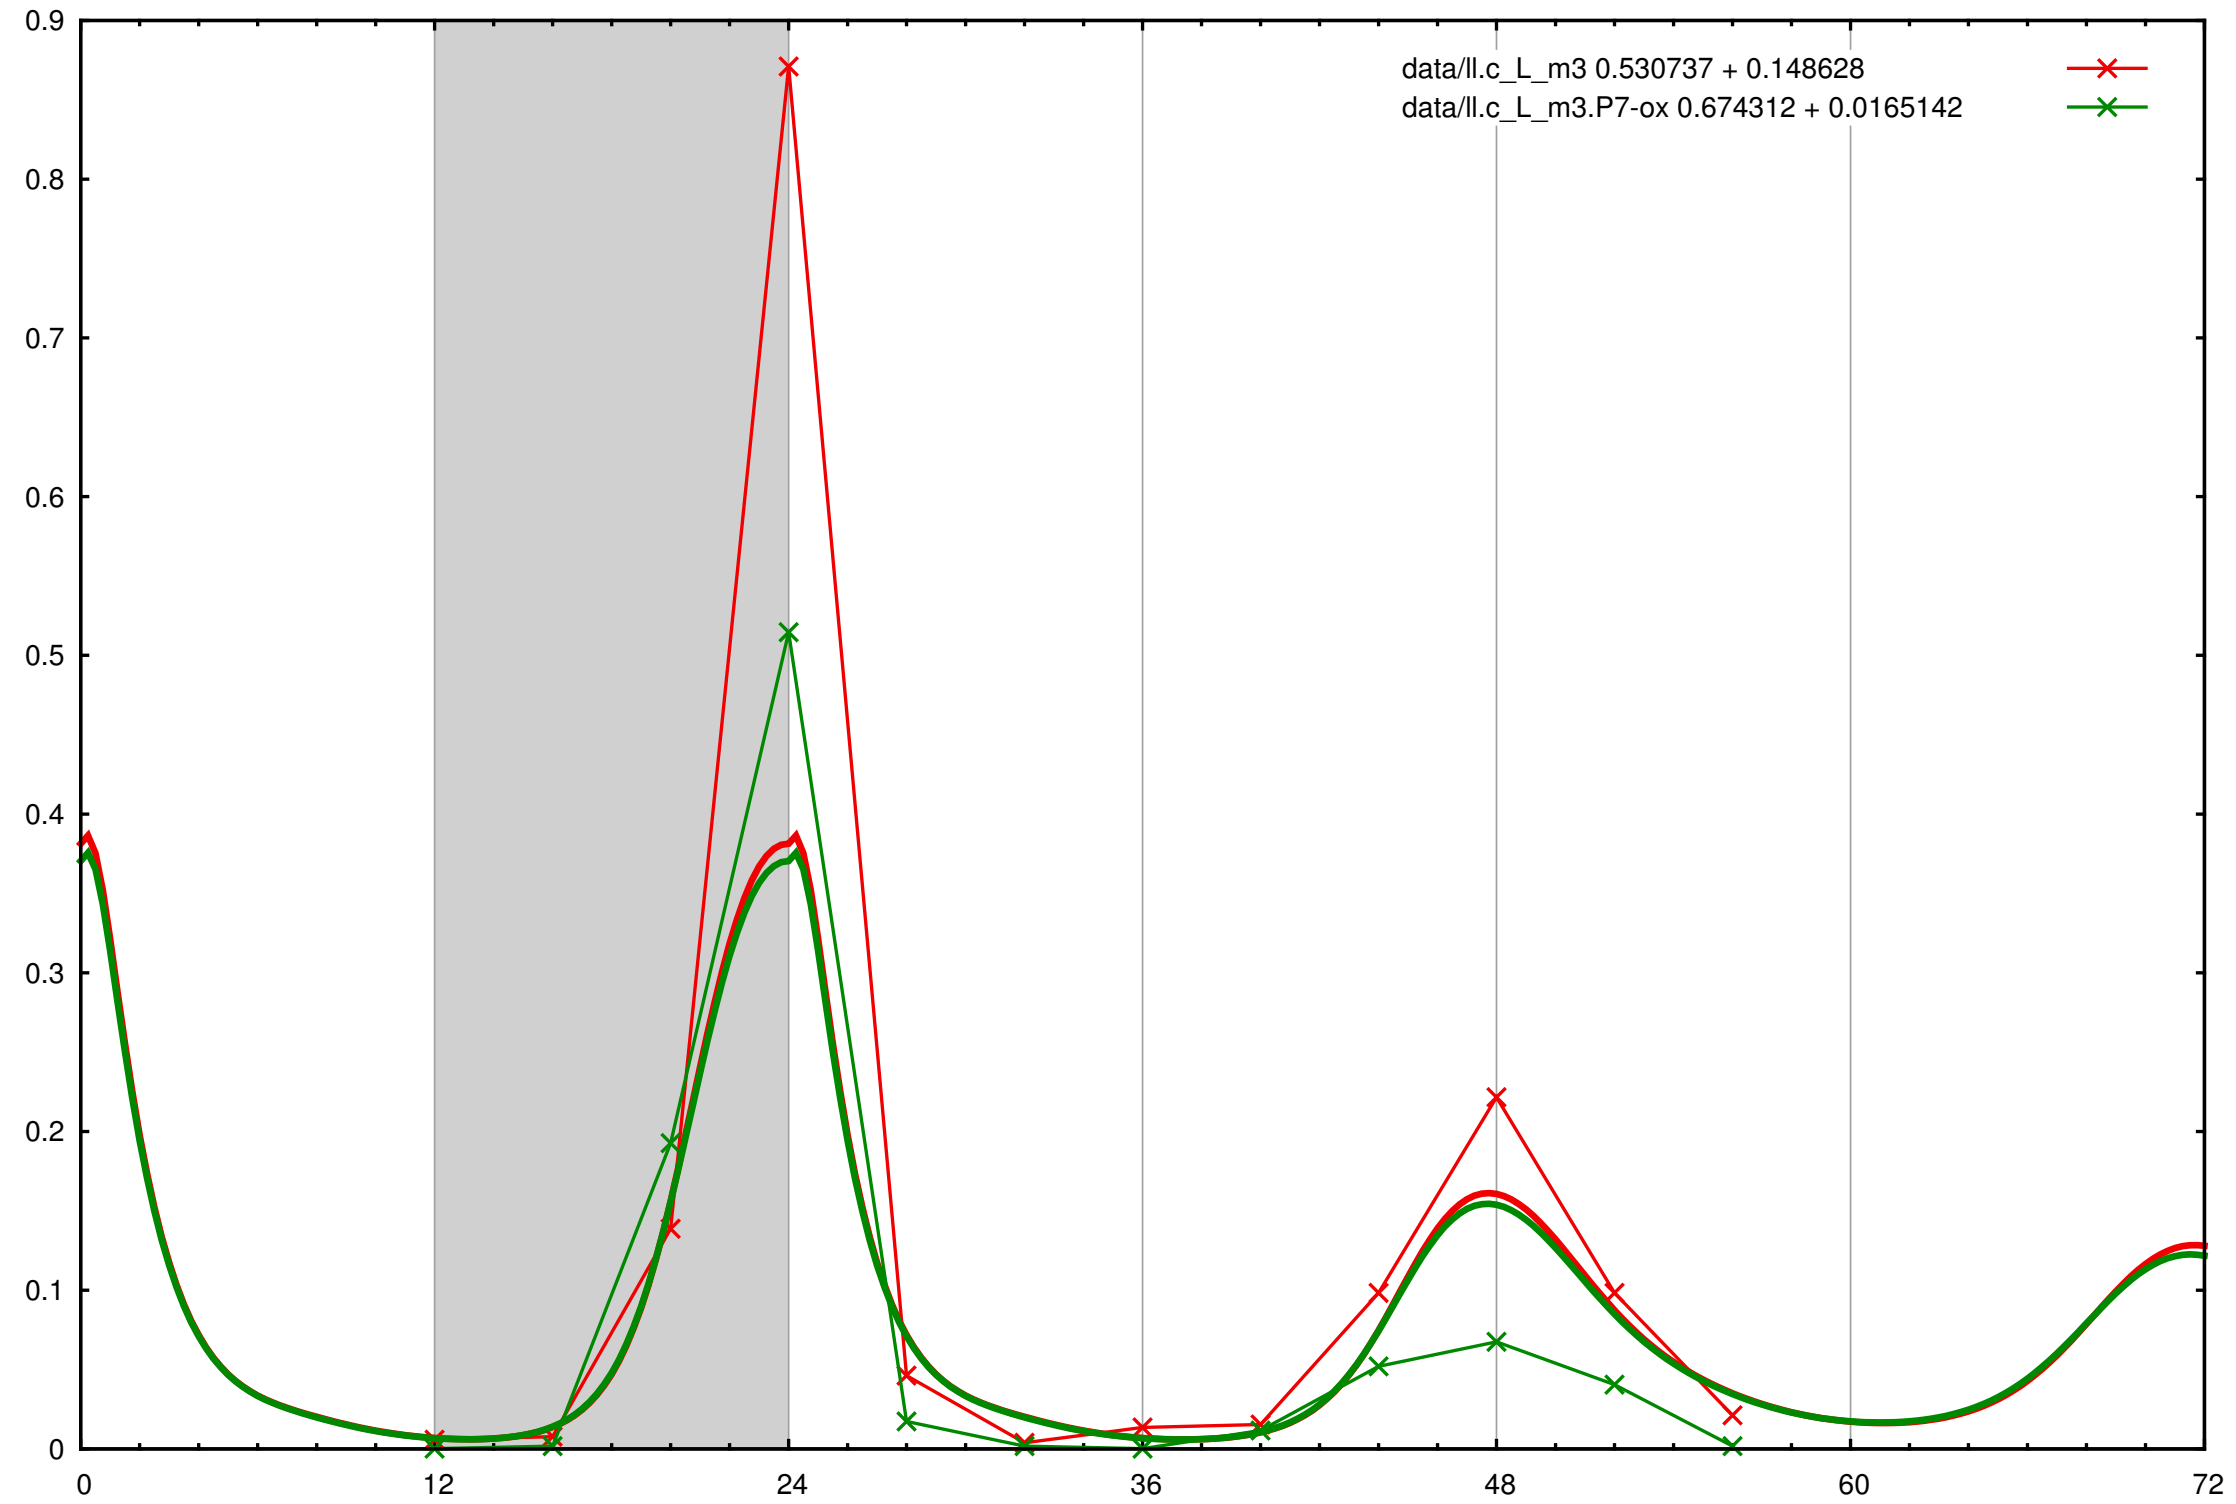



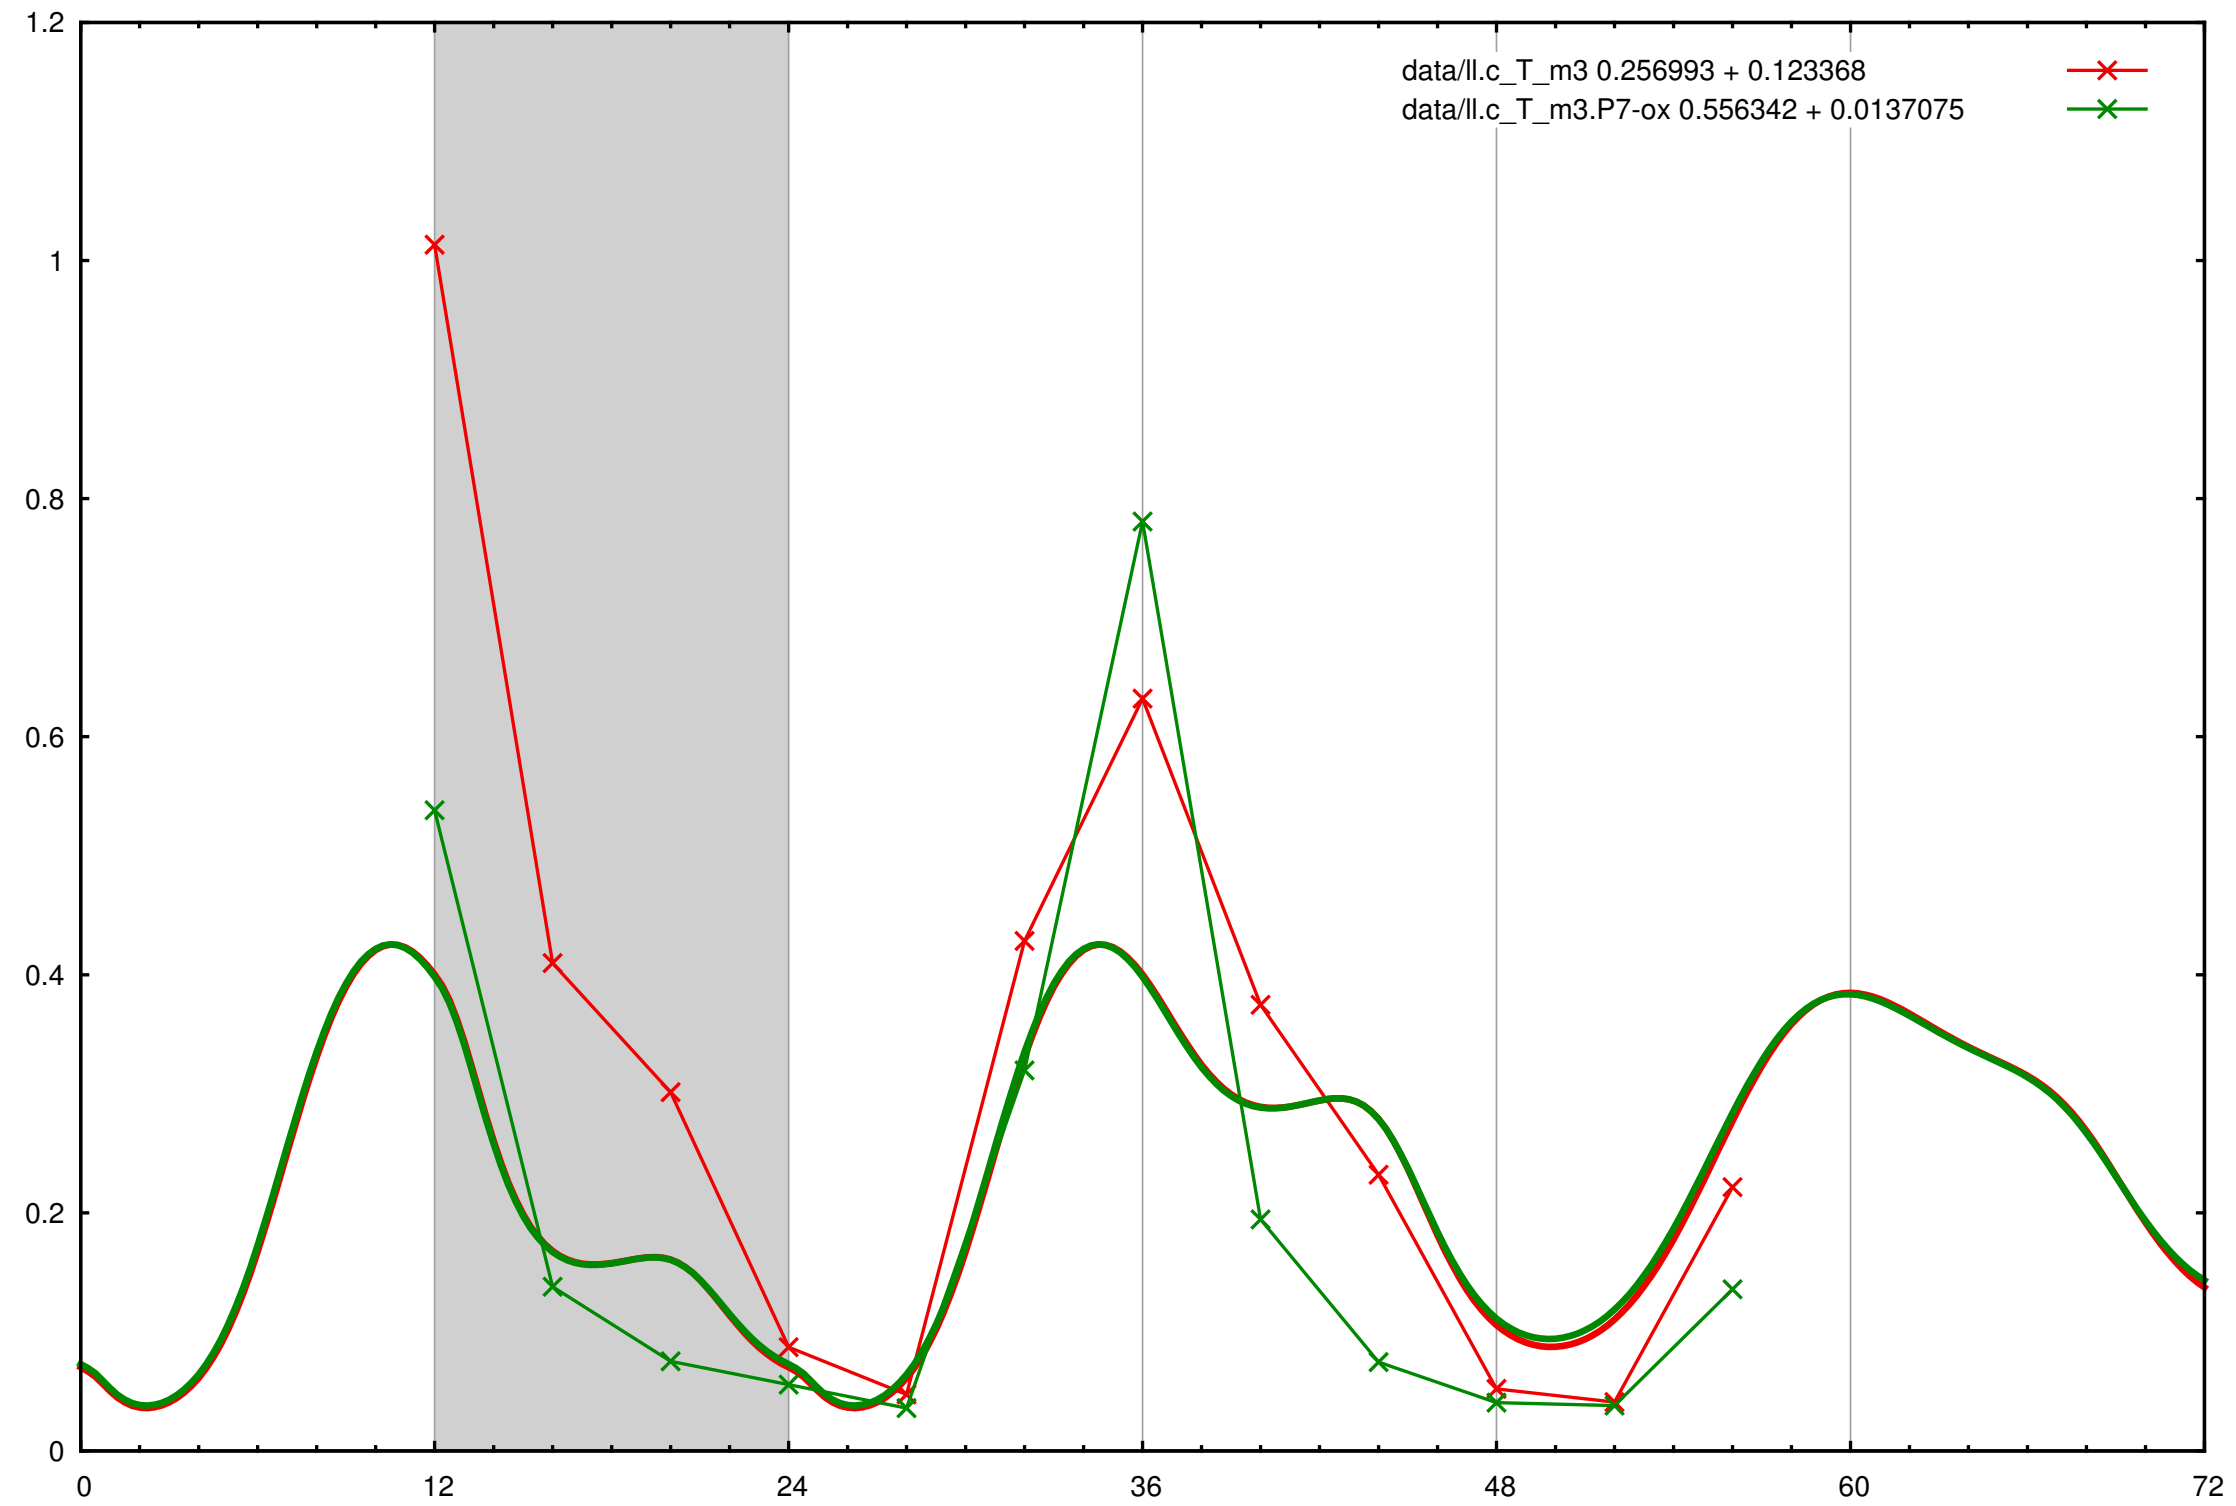

Scale group 18, scost 0.188606

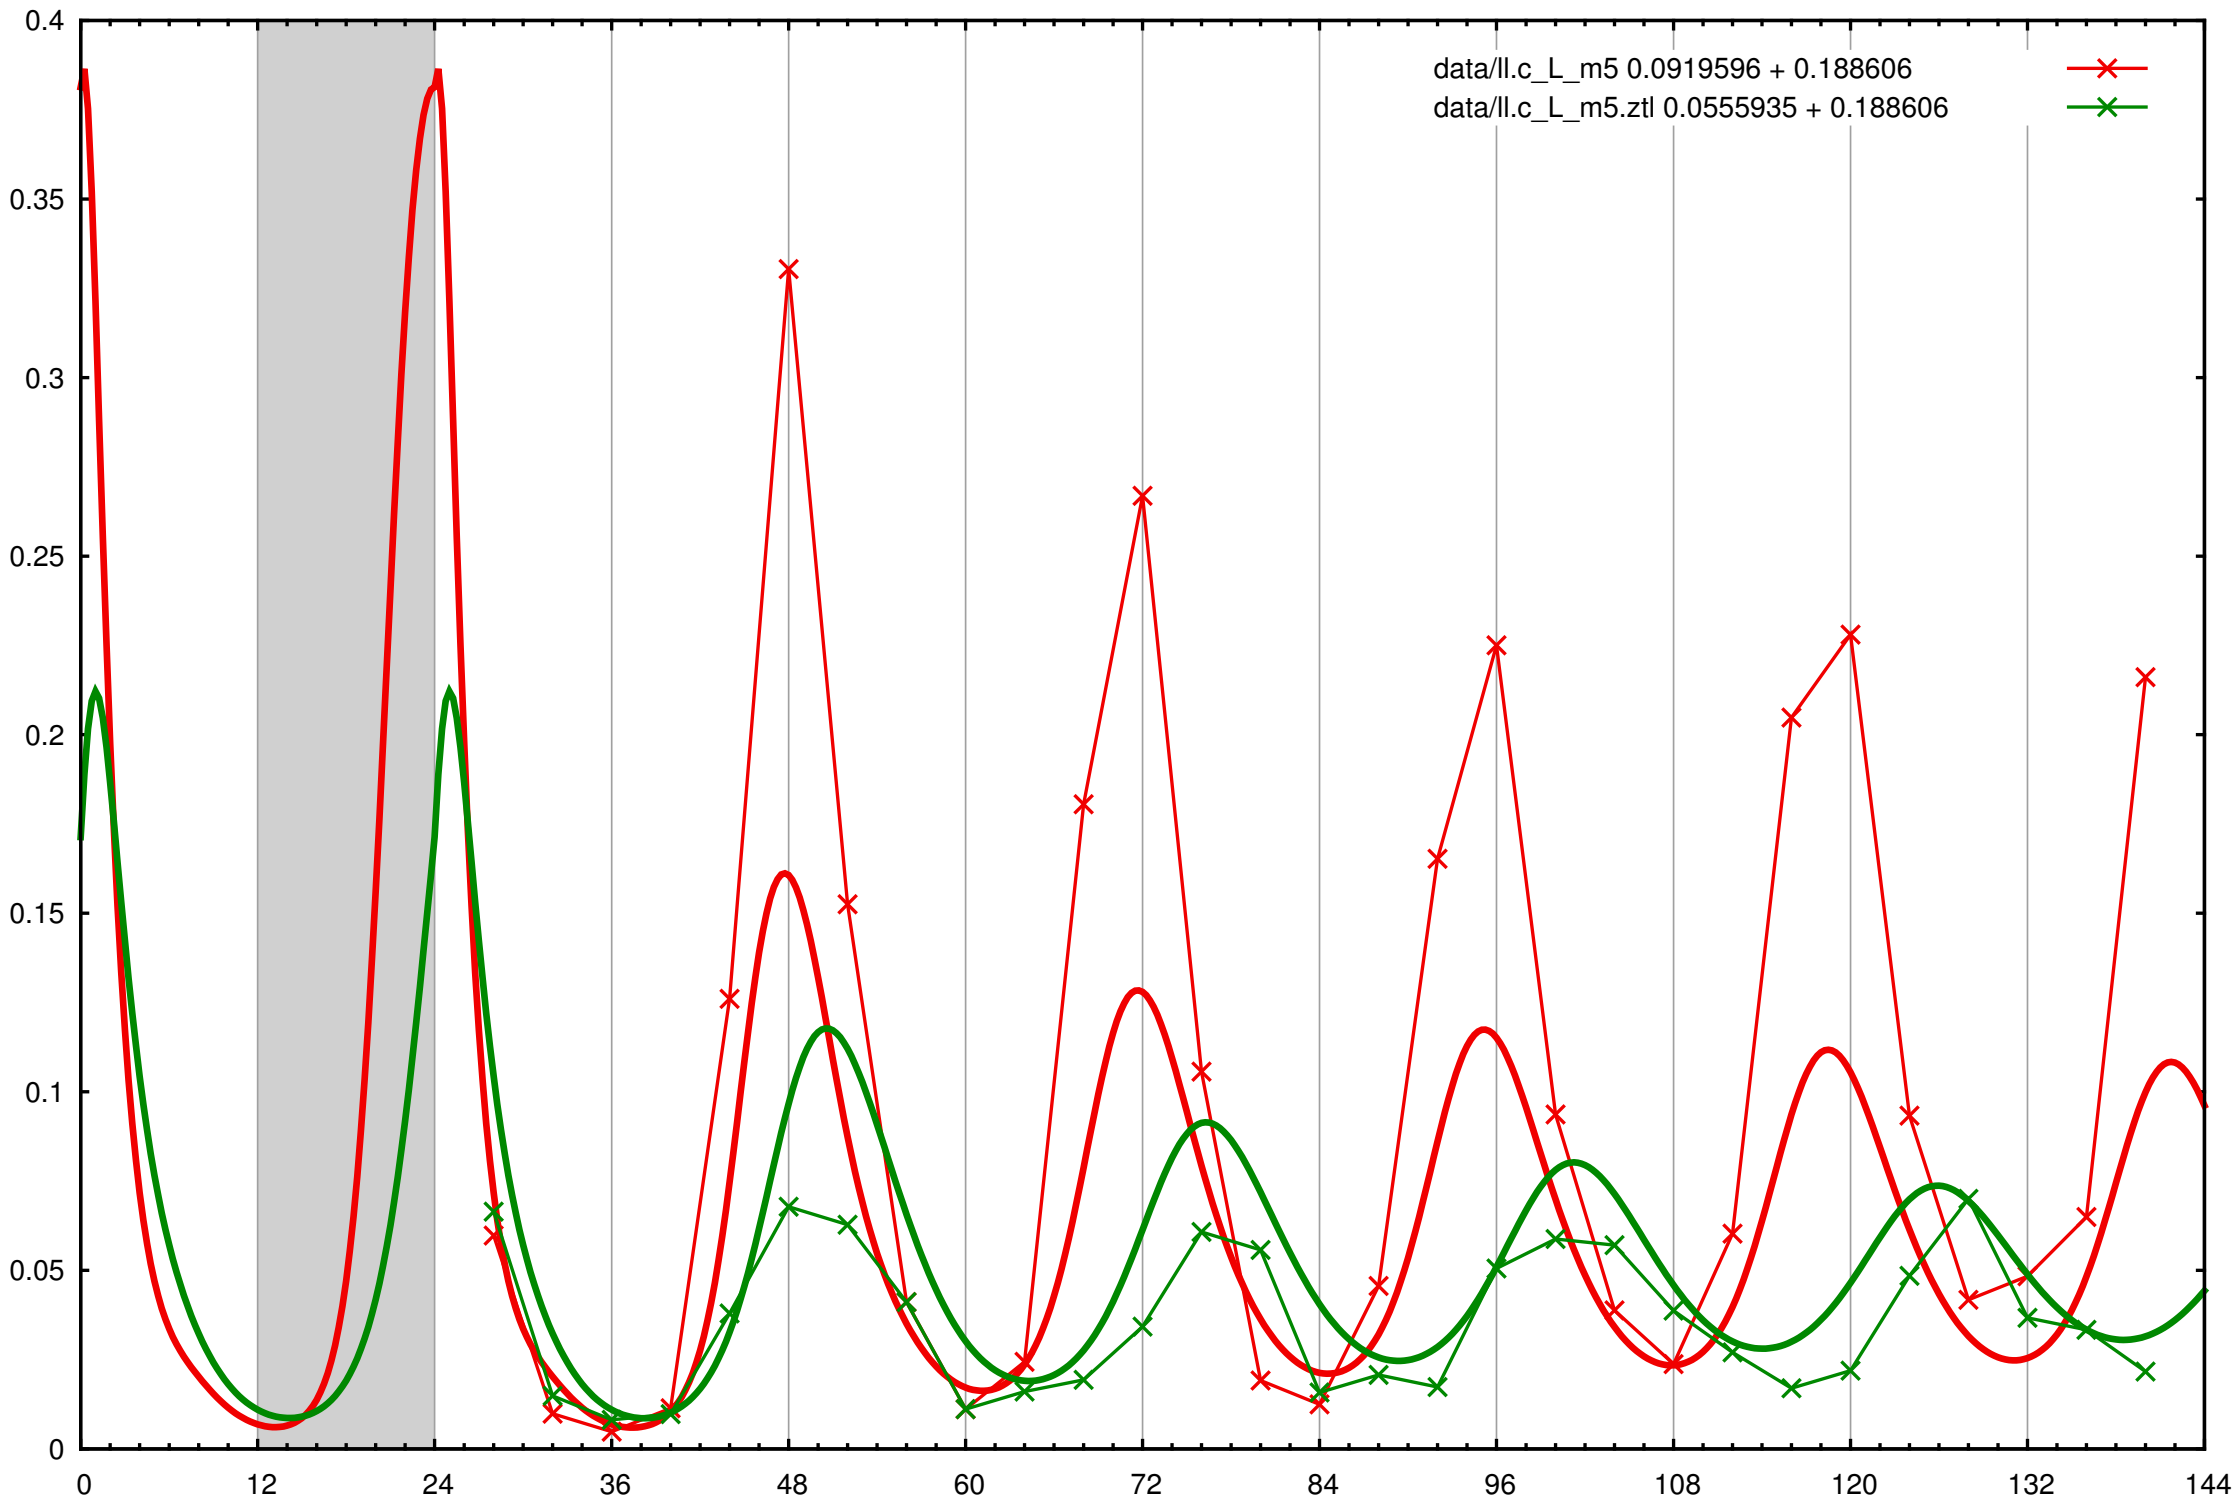

Scale group 19, scost 0.0749585

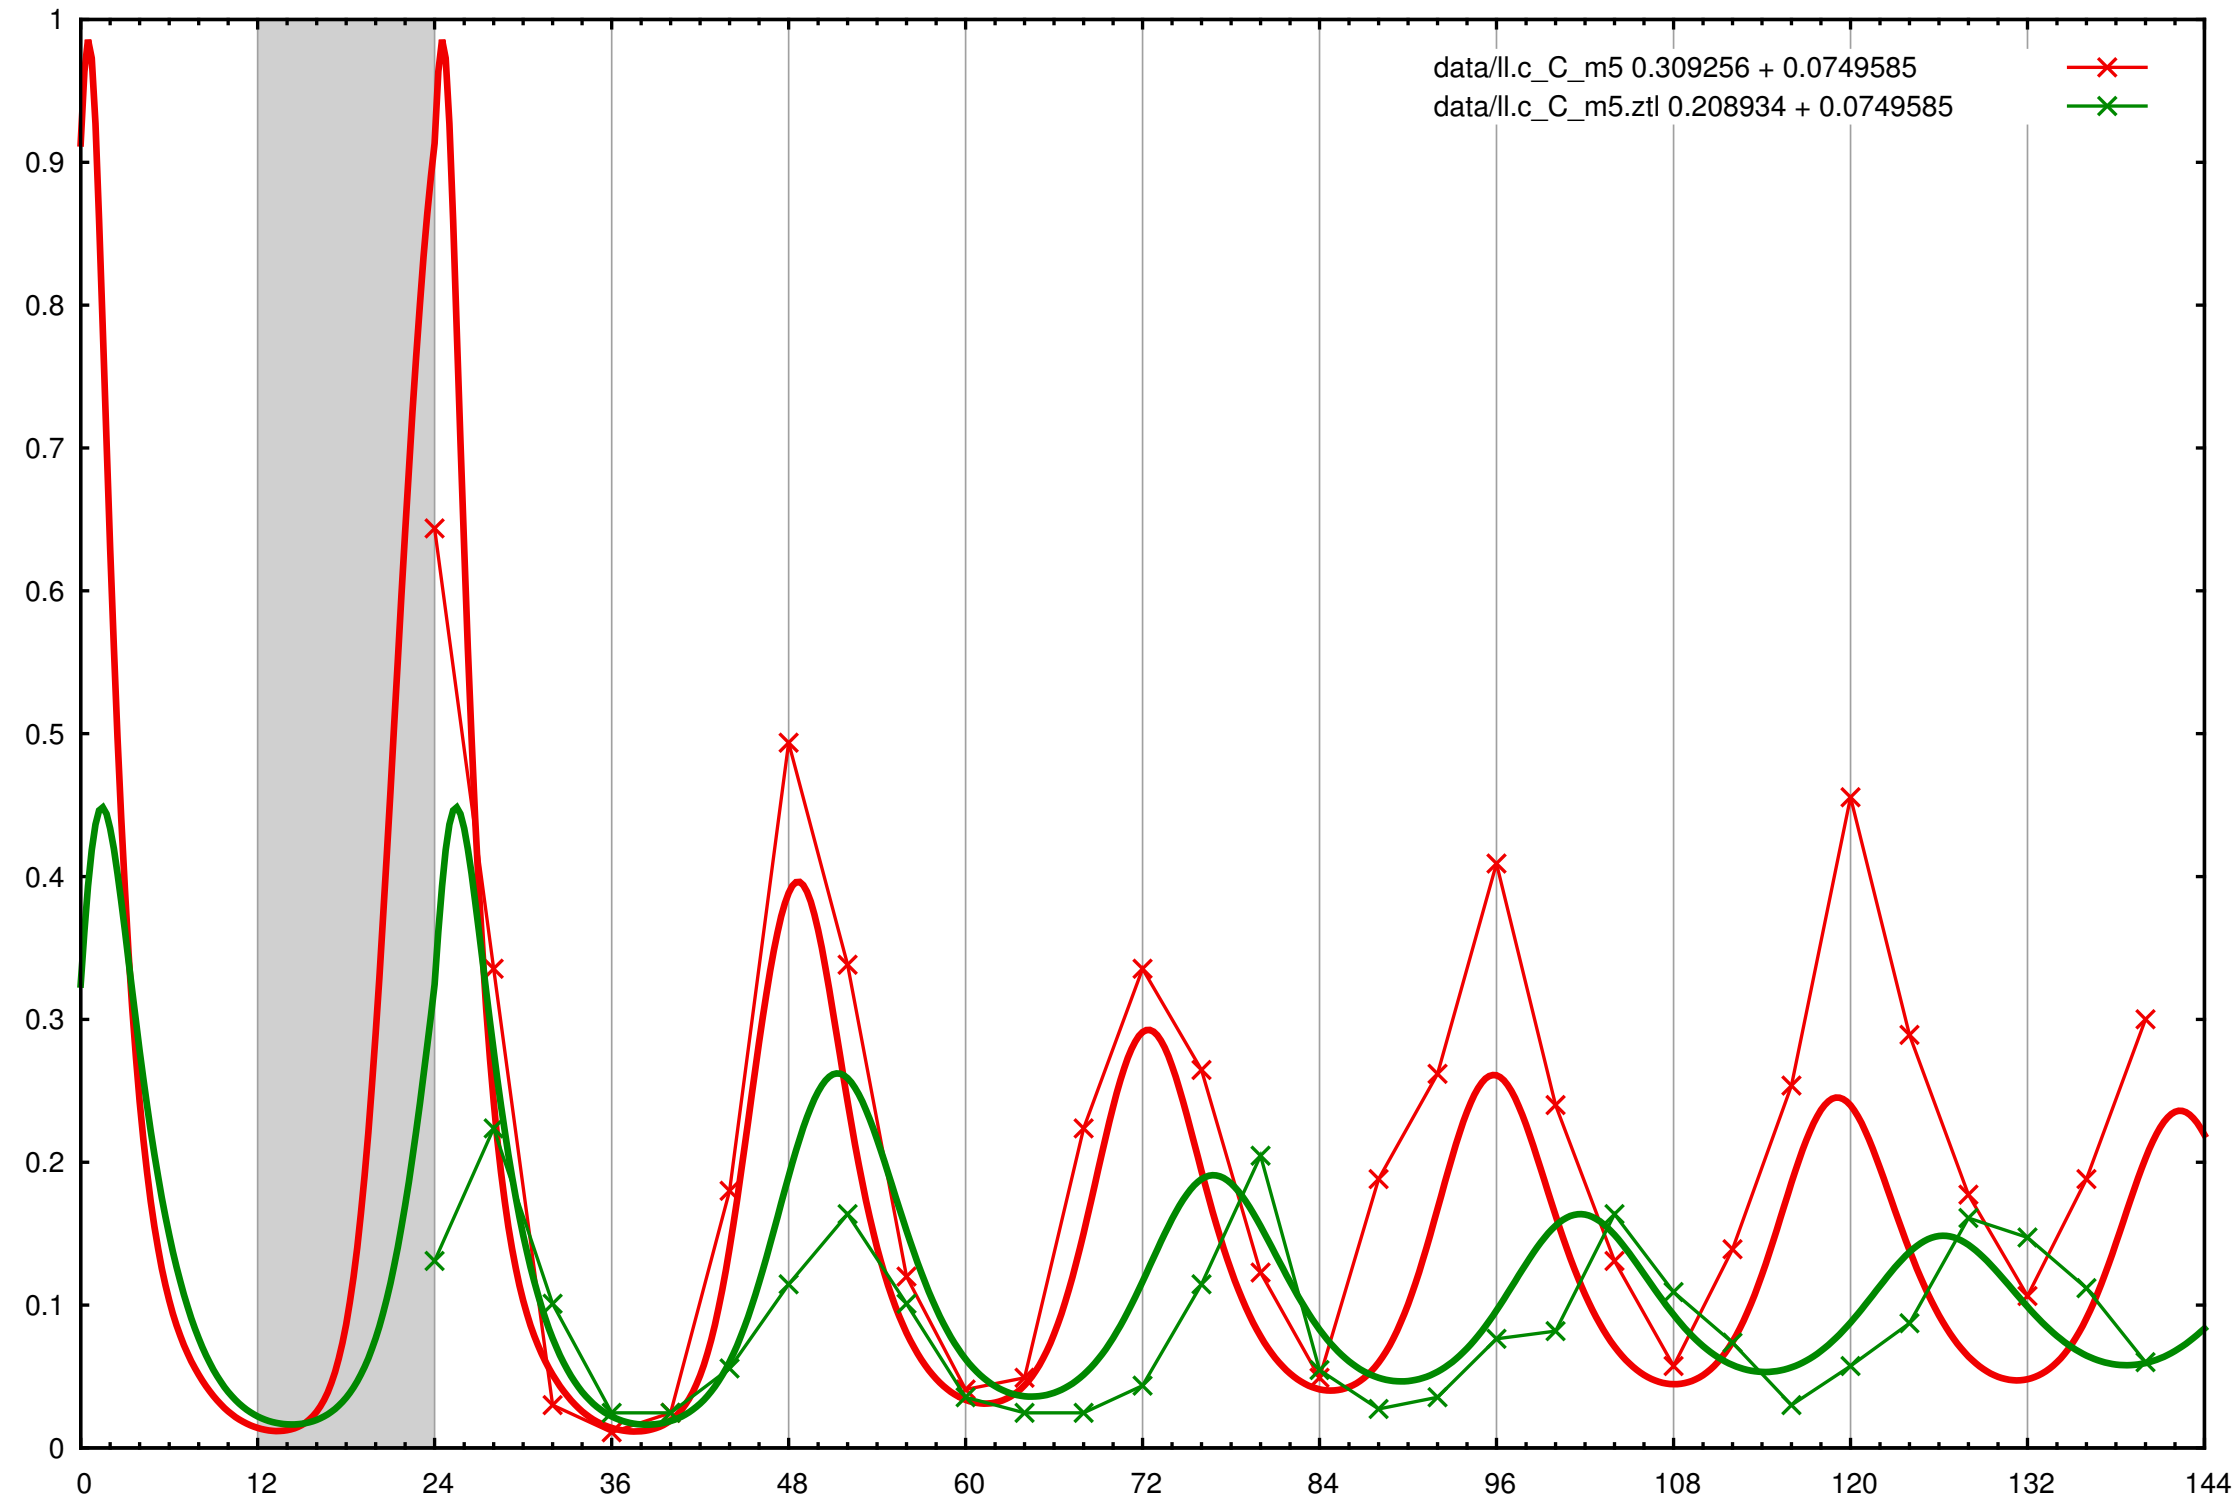

Scale group 20, scost 0.00624021

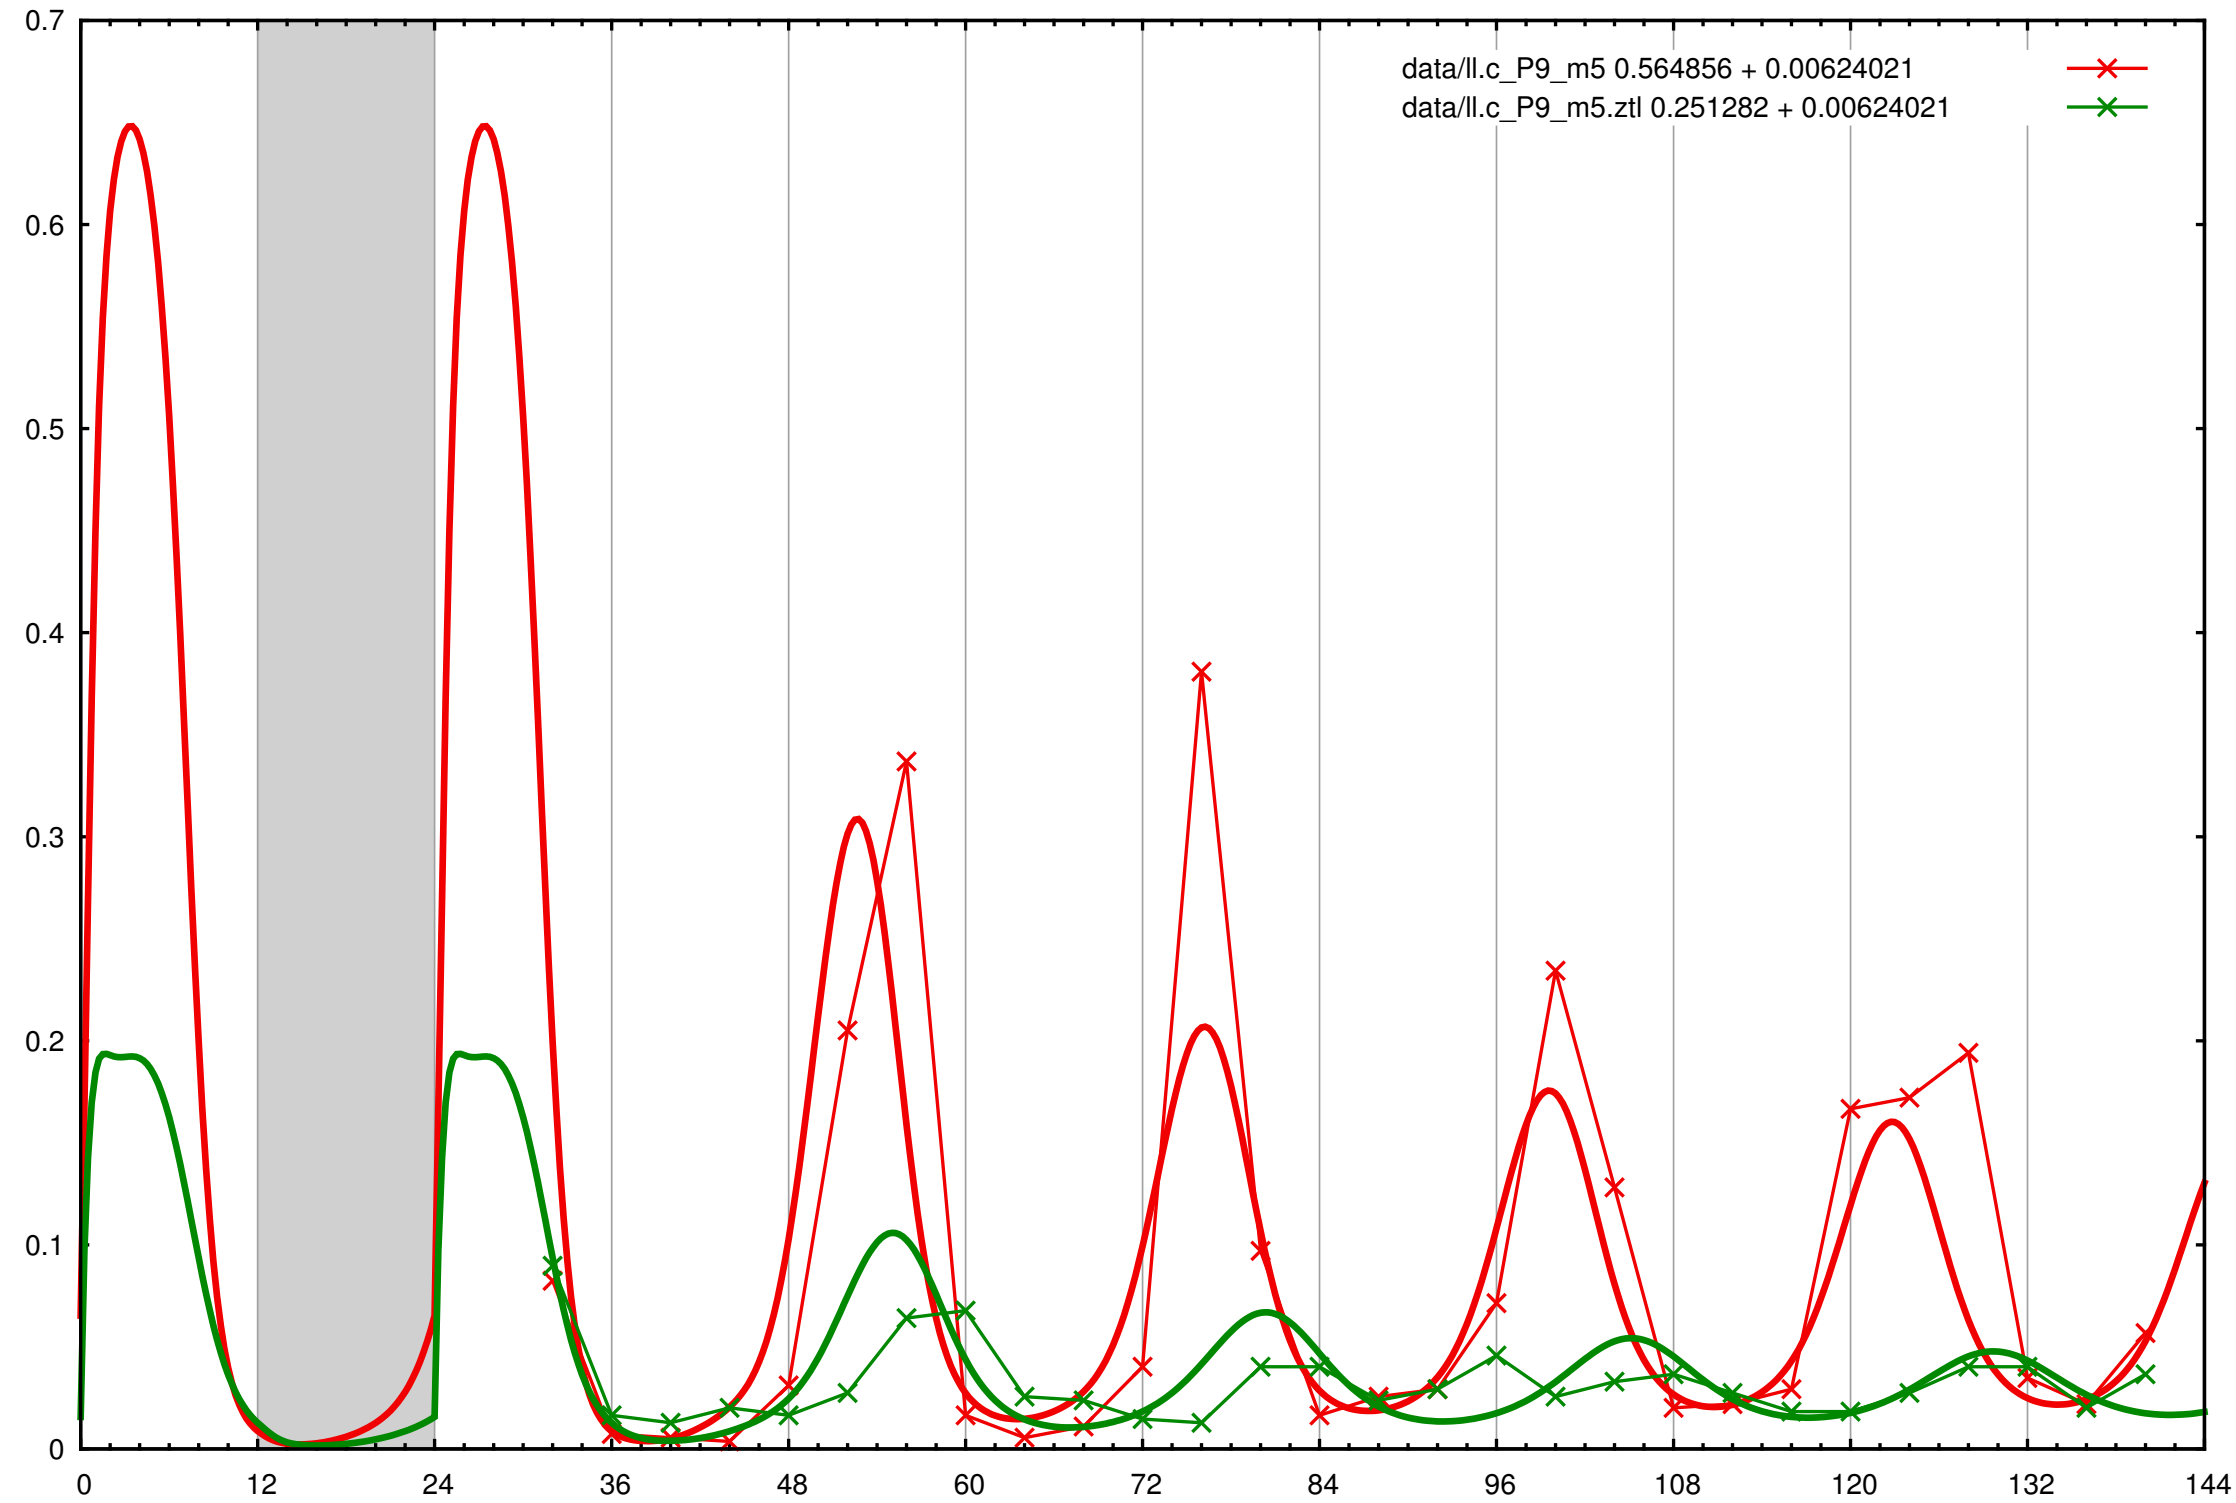

Scale group 21, scost 0.0298401

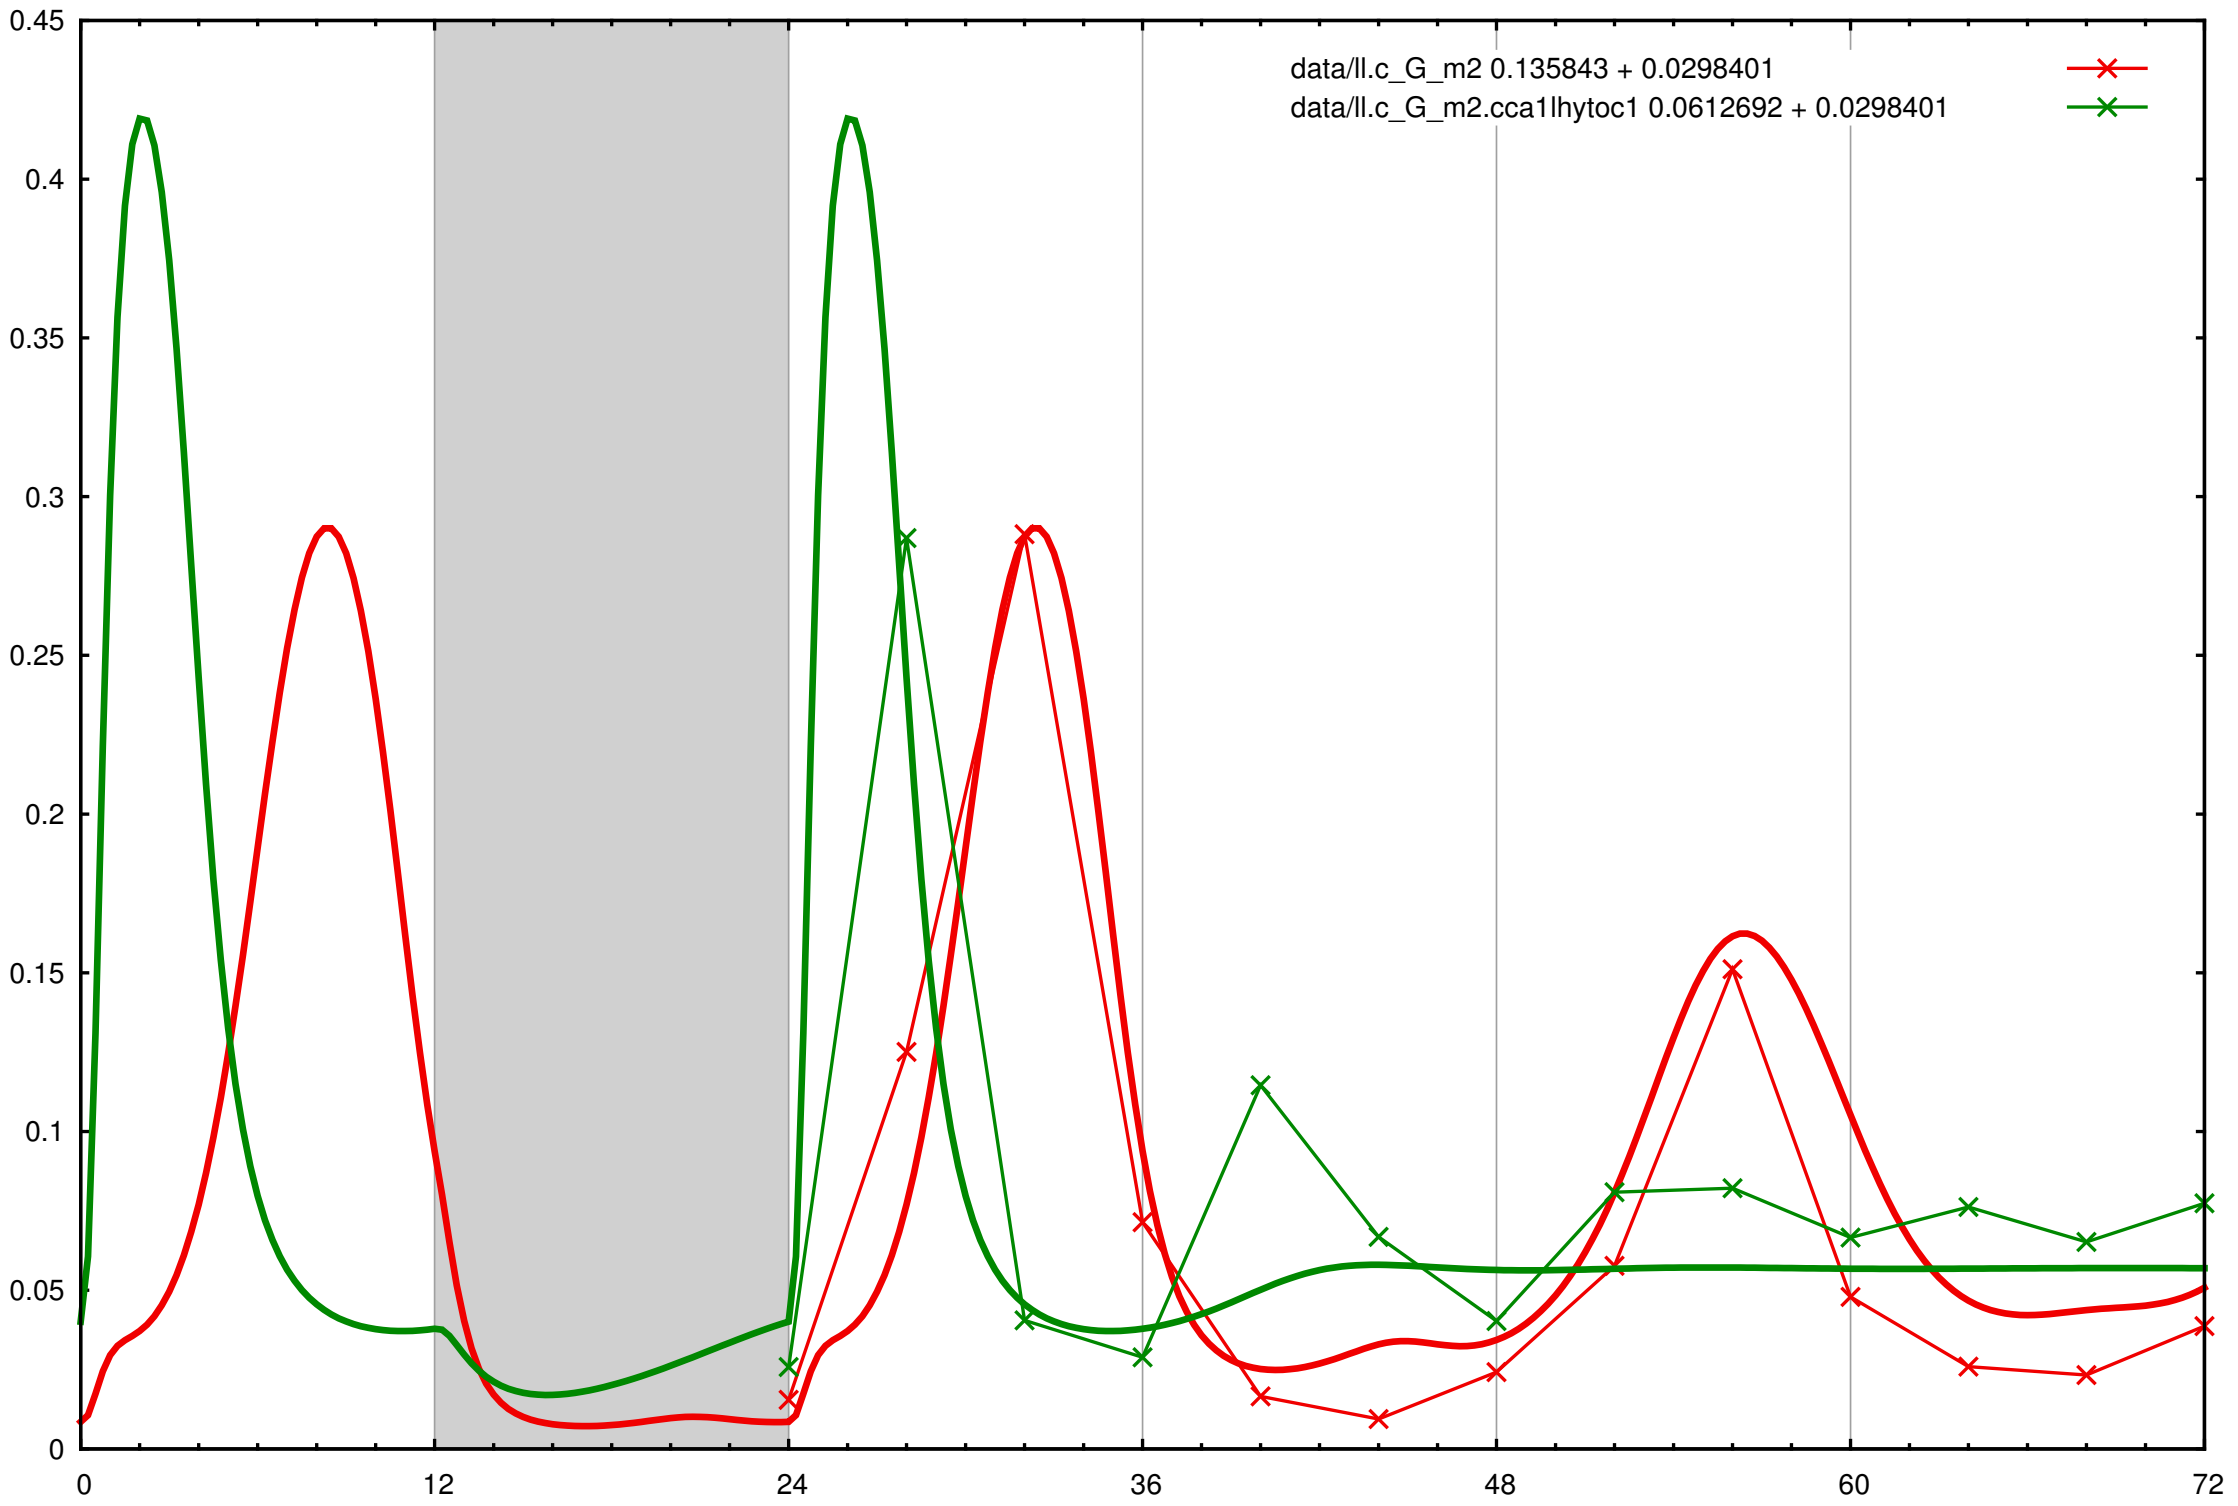

Scale group 22, scost 0.0541662

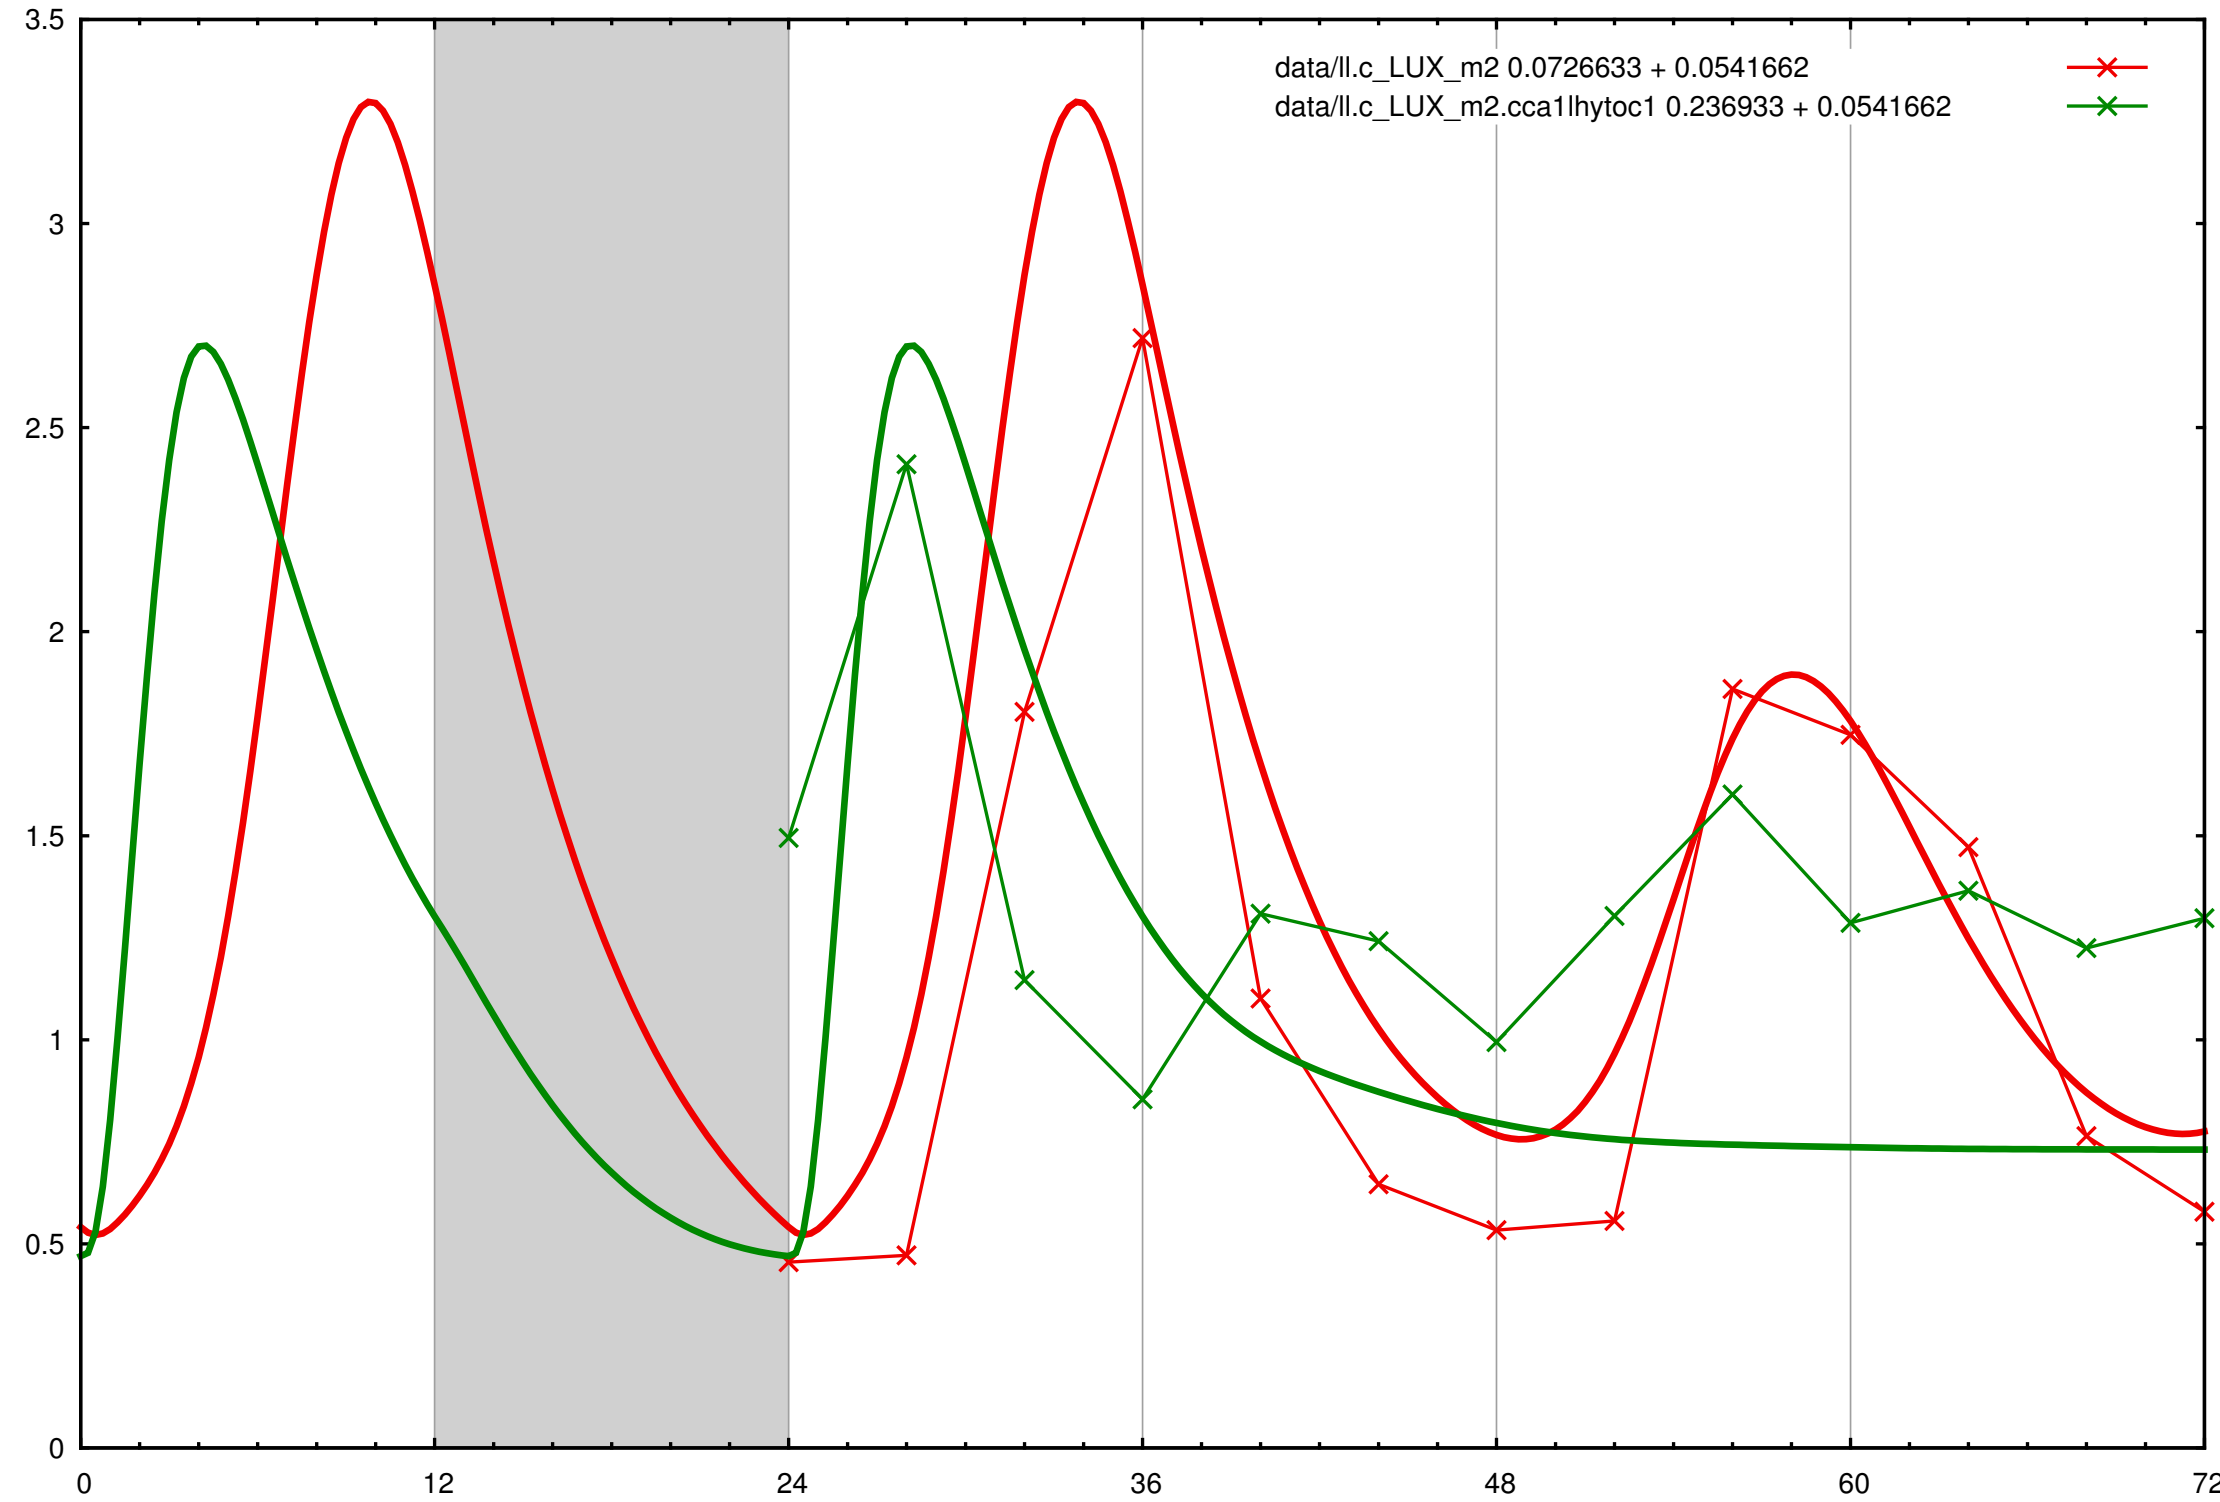

Scale group 23, scost 0.460632

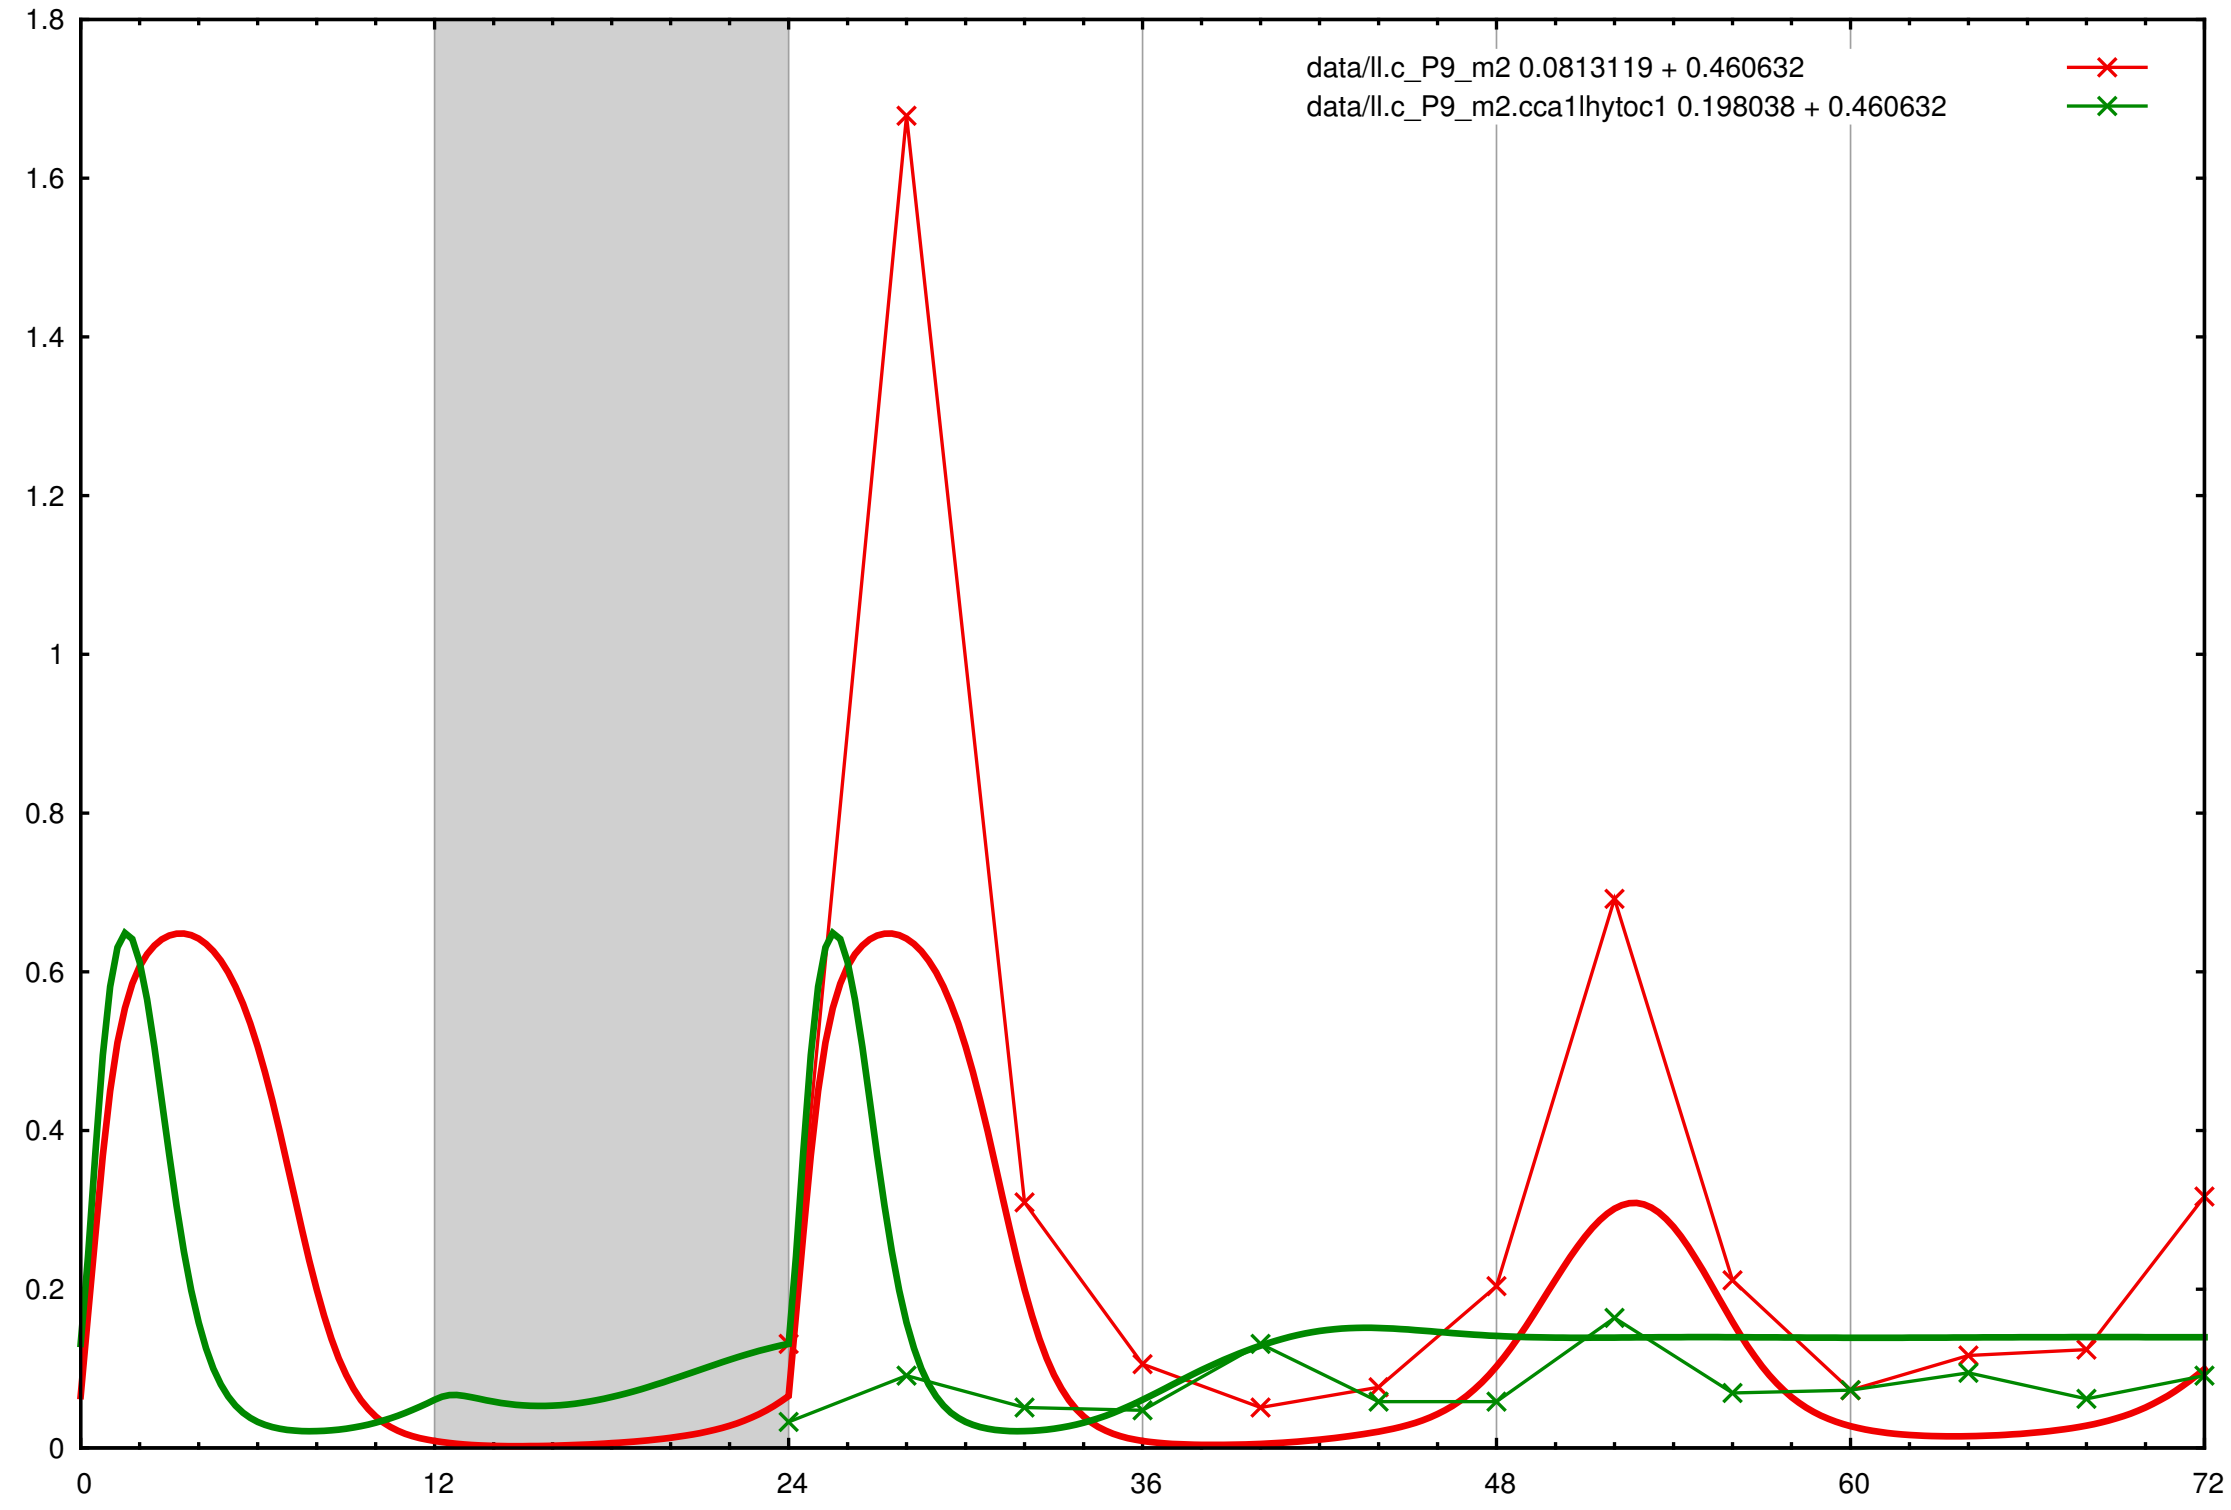

Scale group 24, scost 0.277449

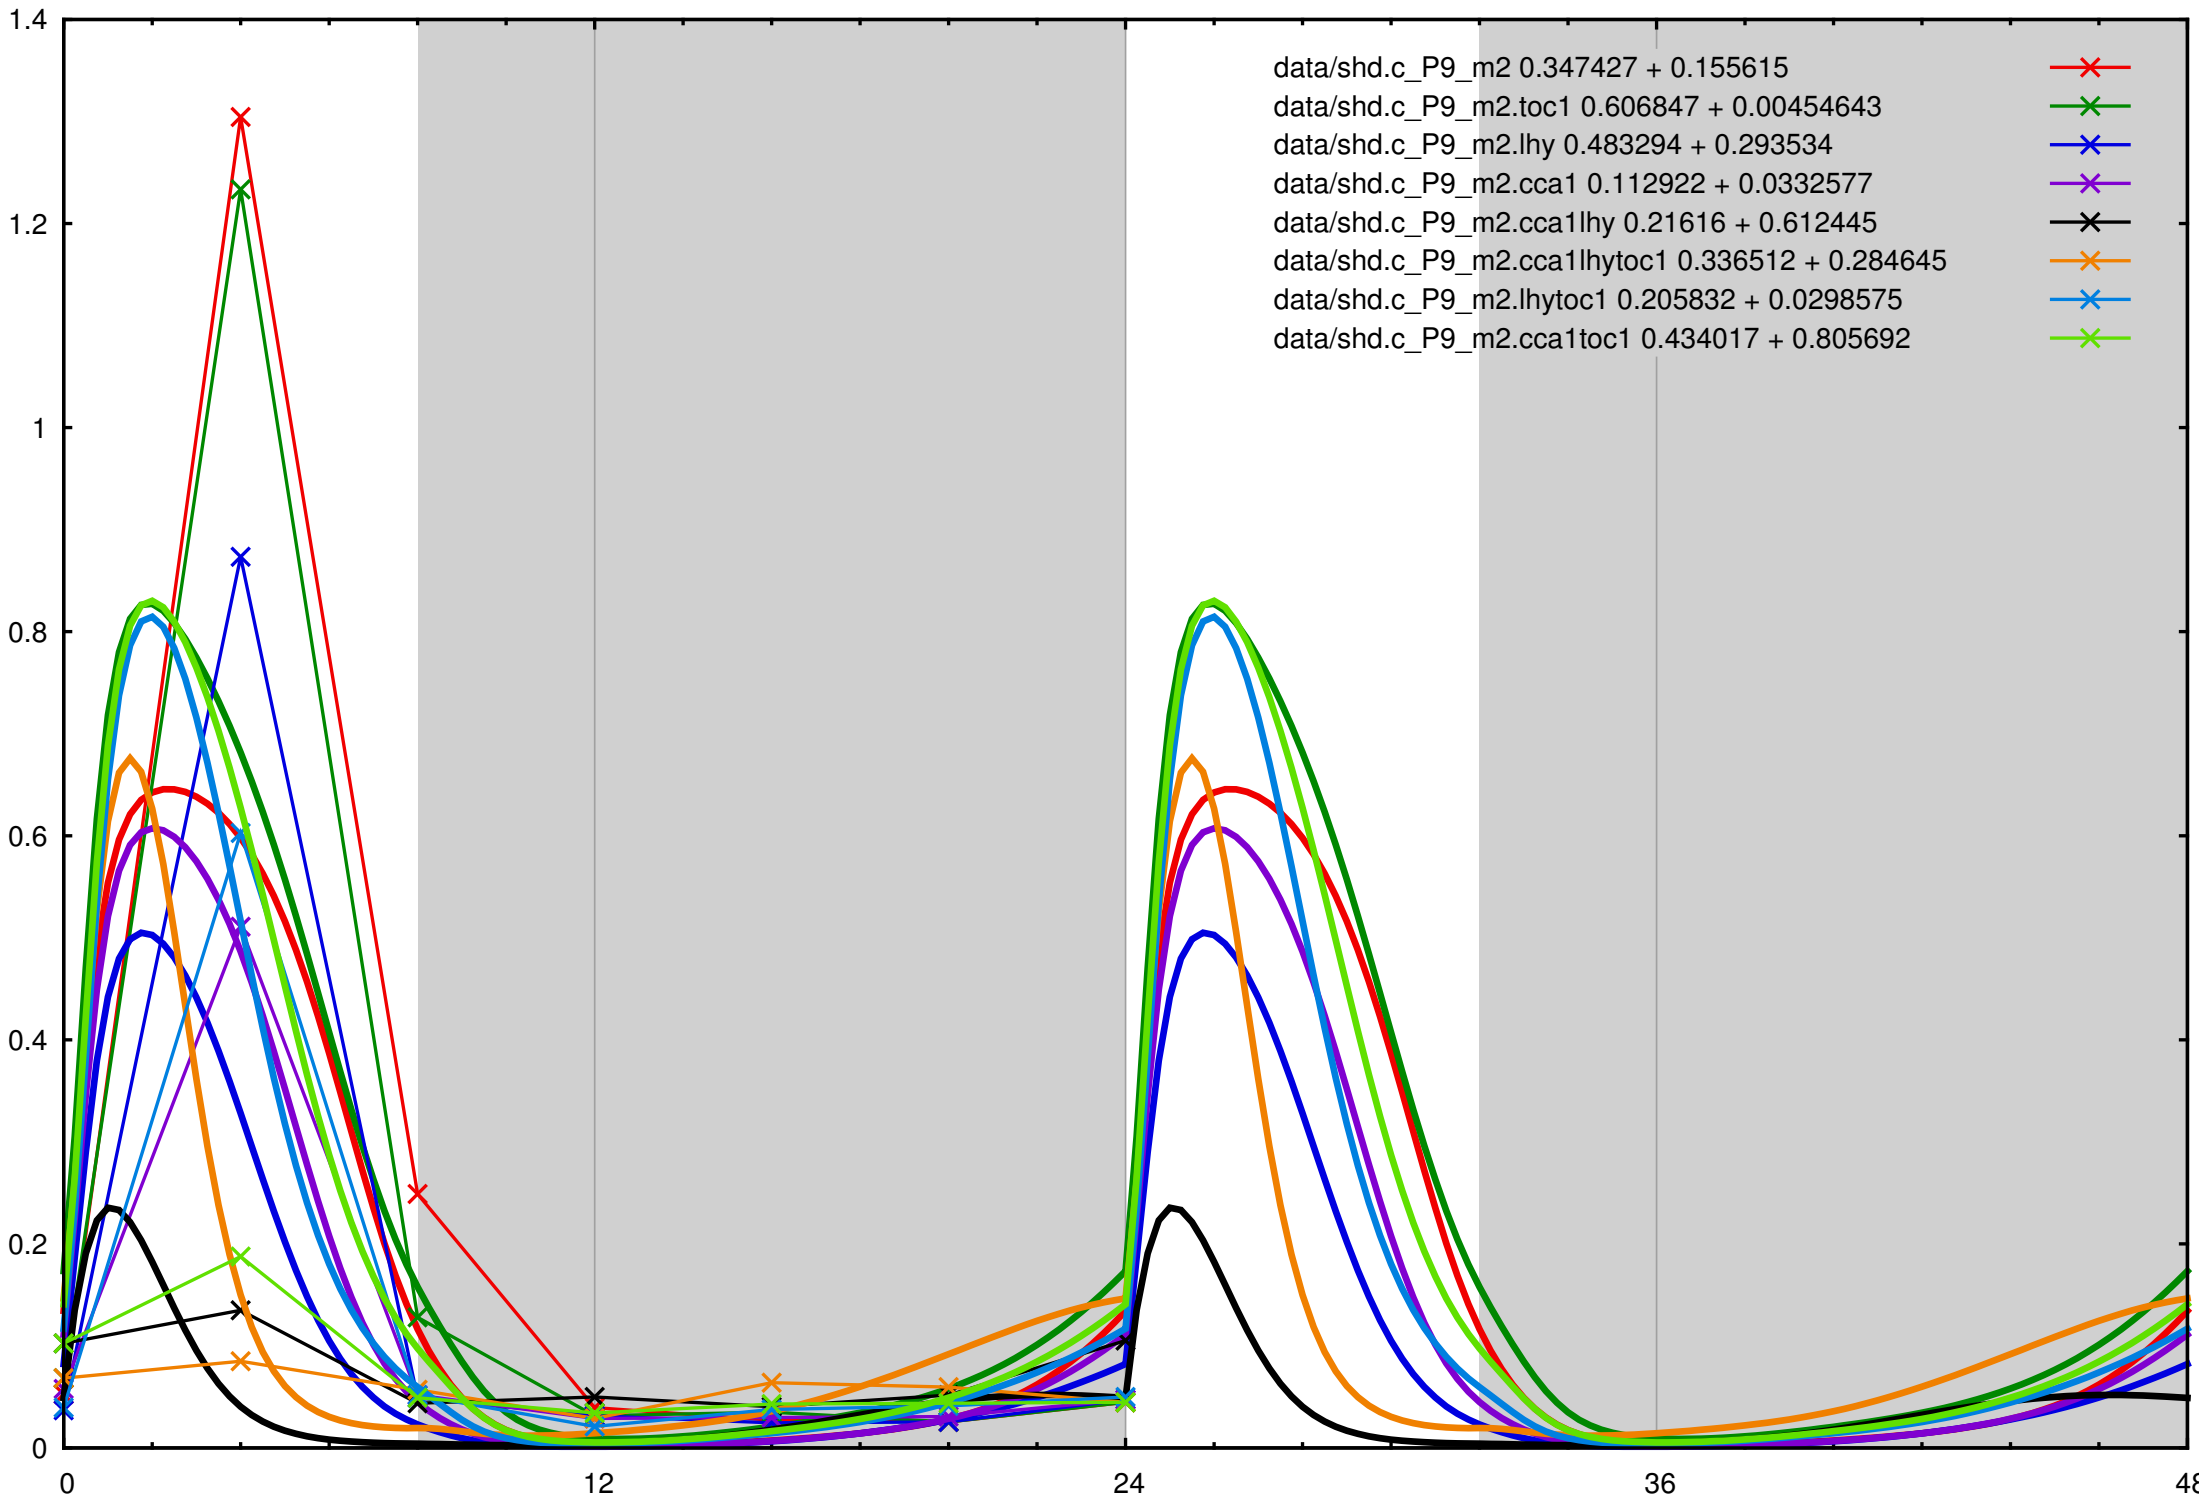



Scale group 25, scost 0.207231

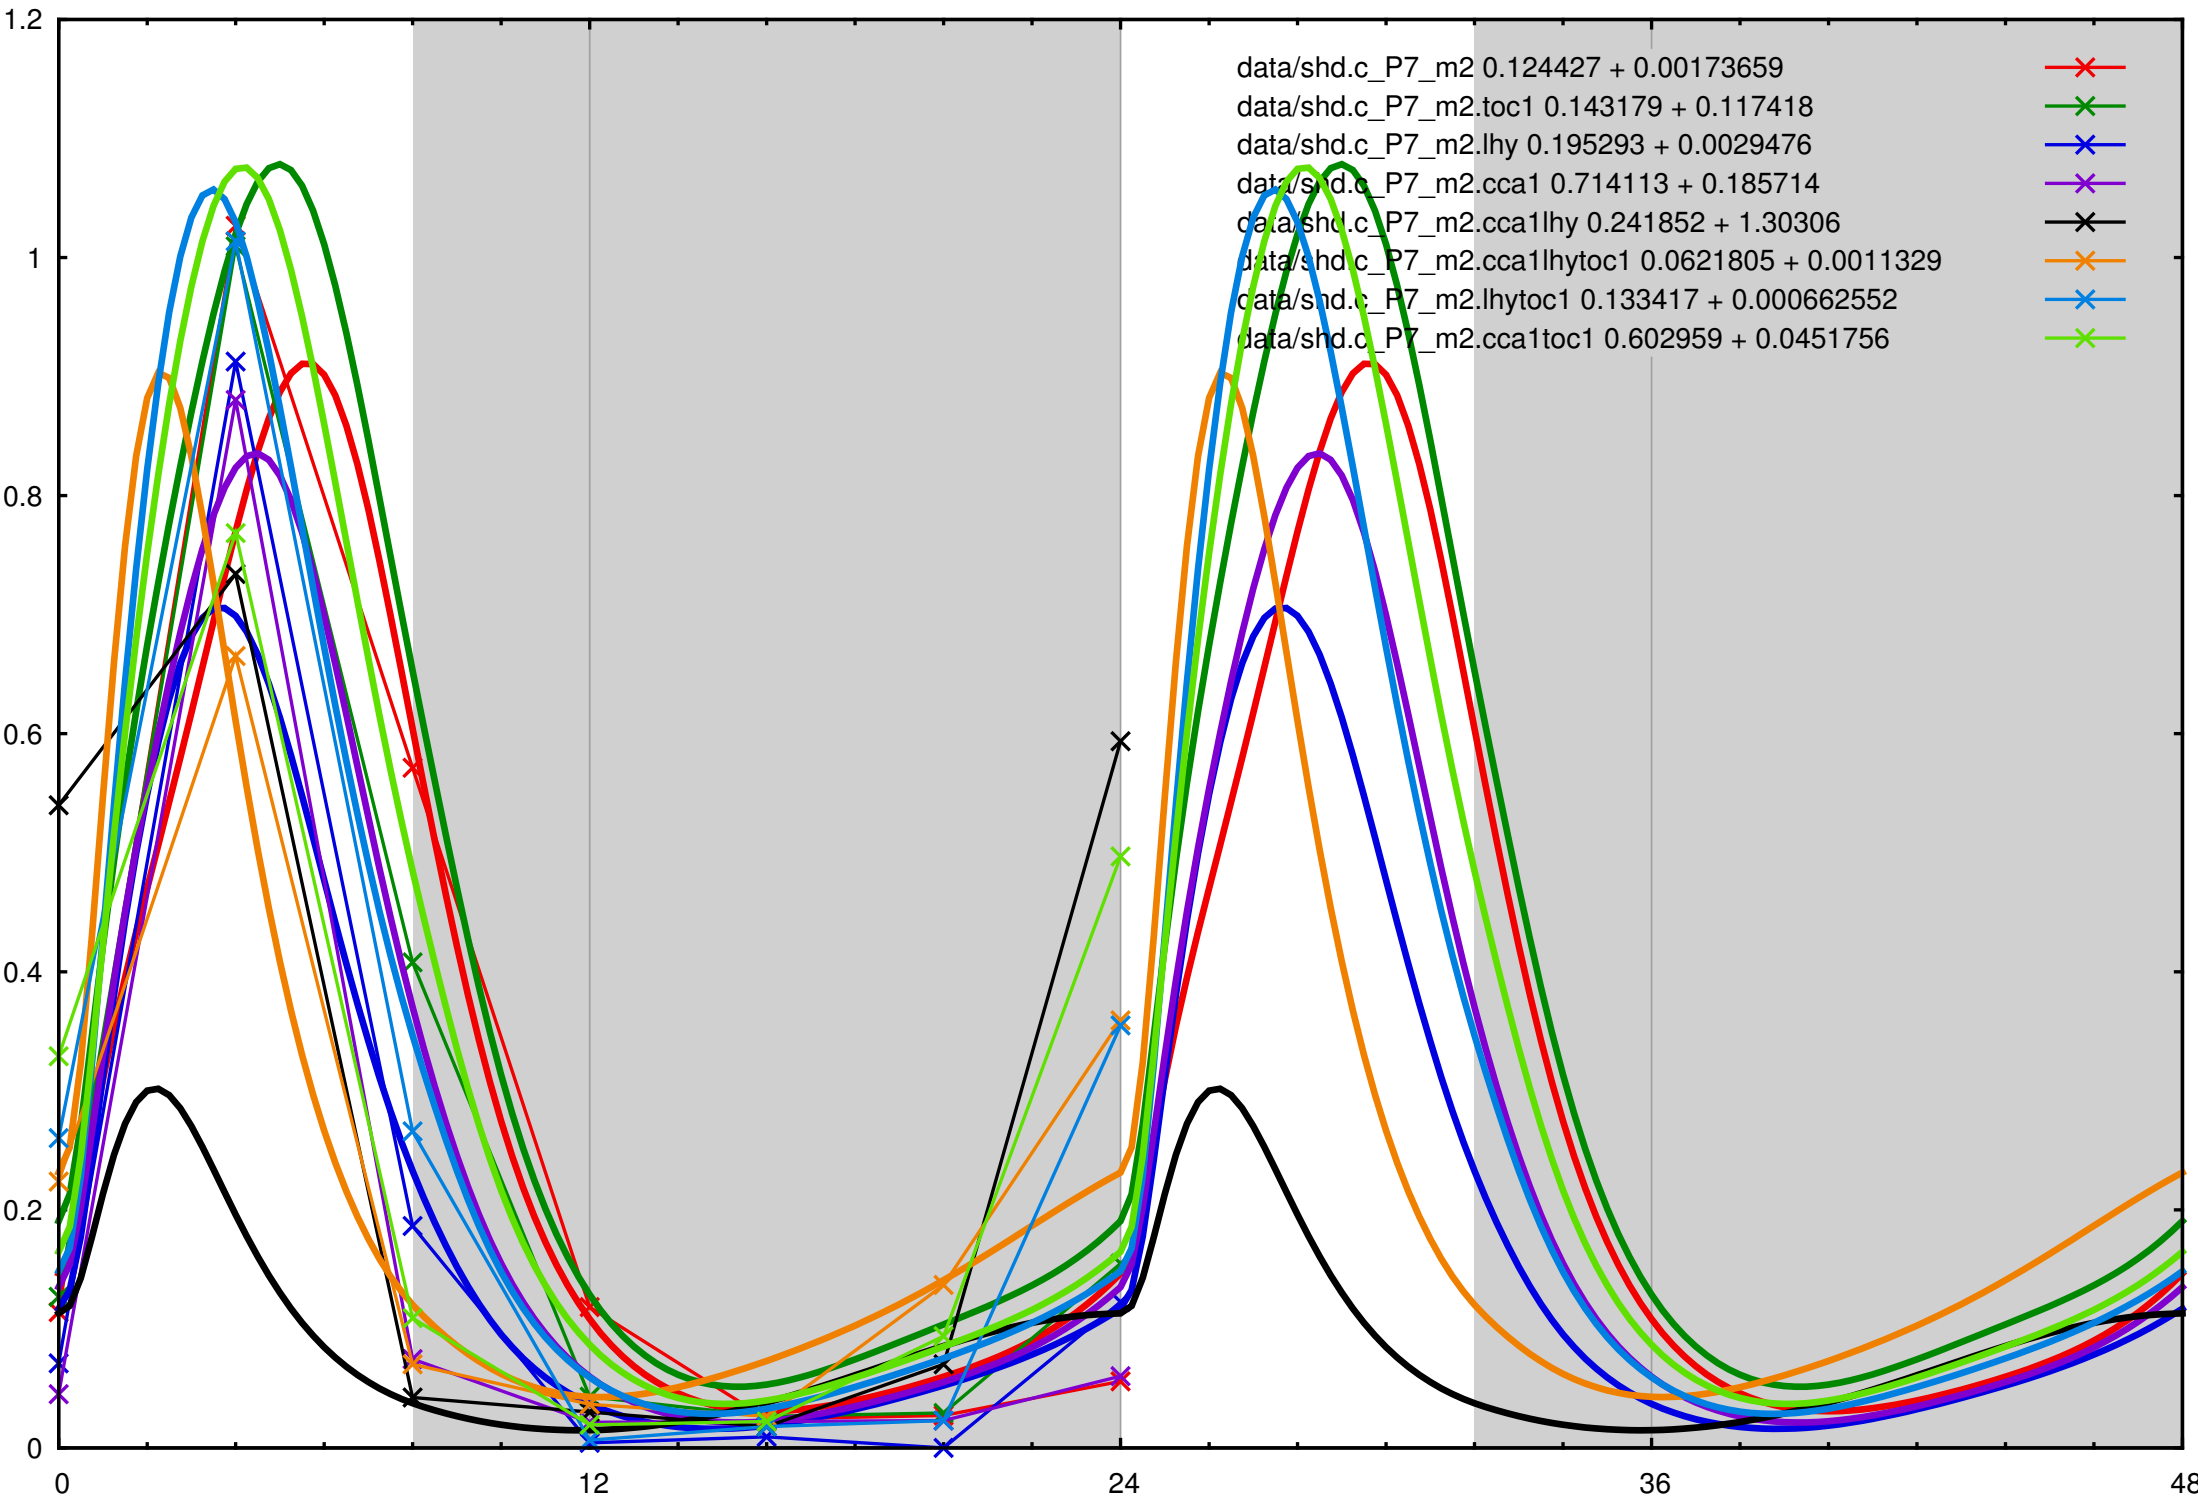

Scale group 26, scost 0.00589759

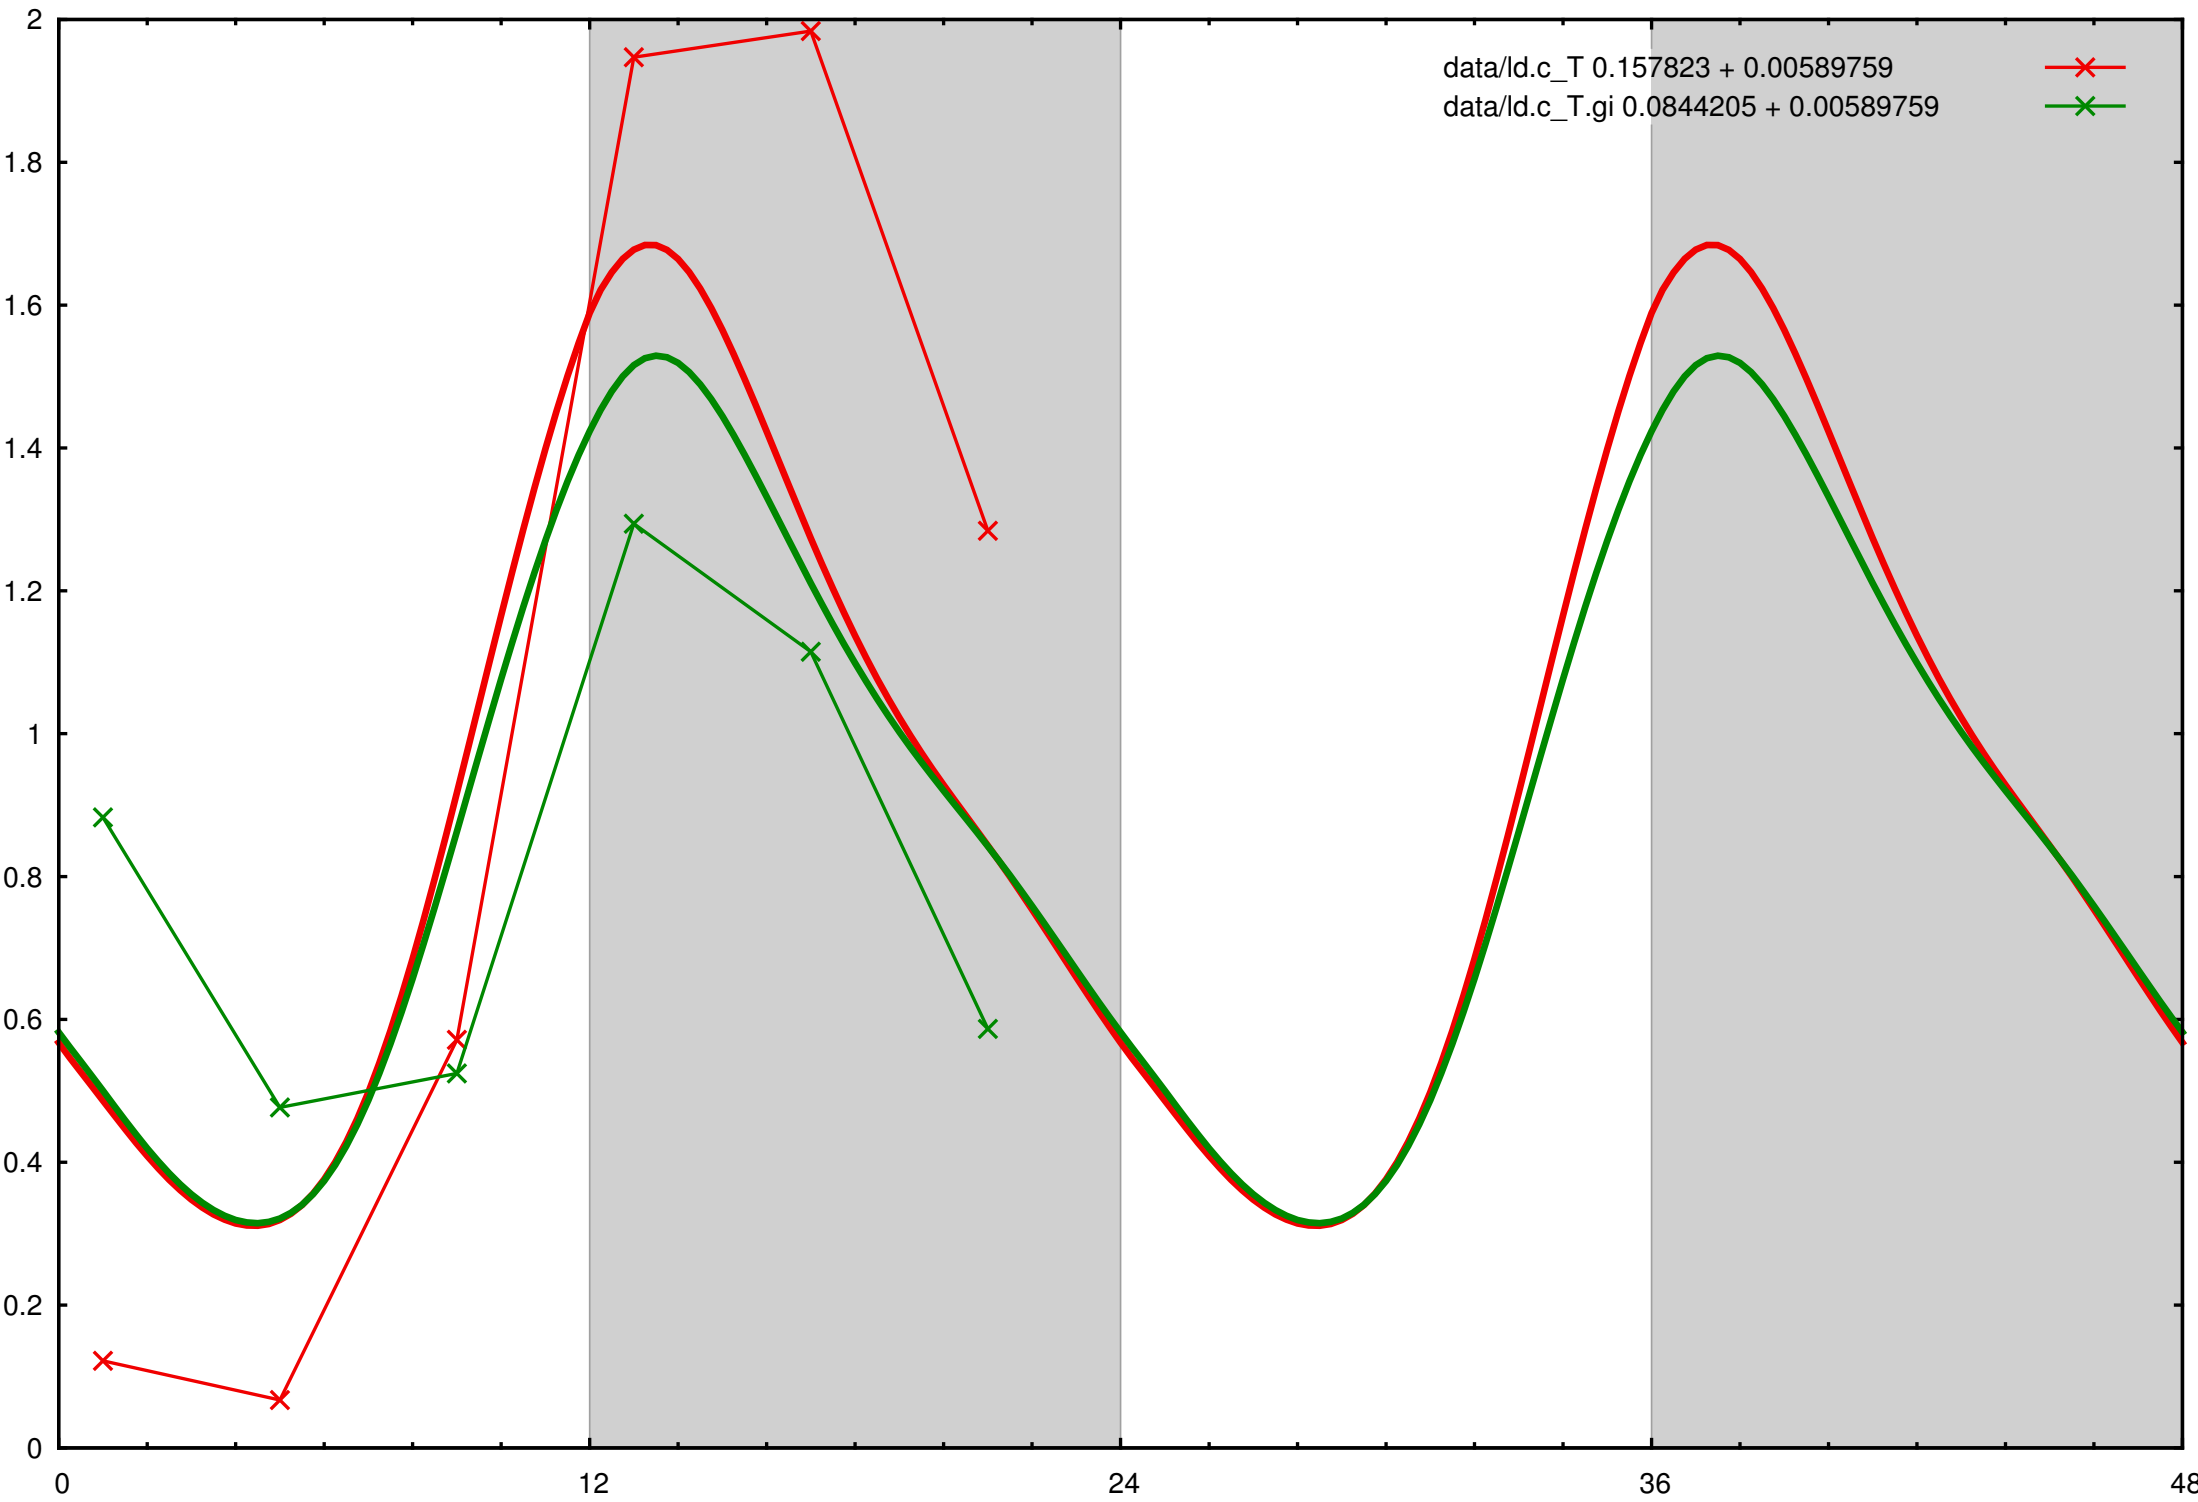

Scale group 27, scost 3.47292e-05

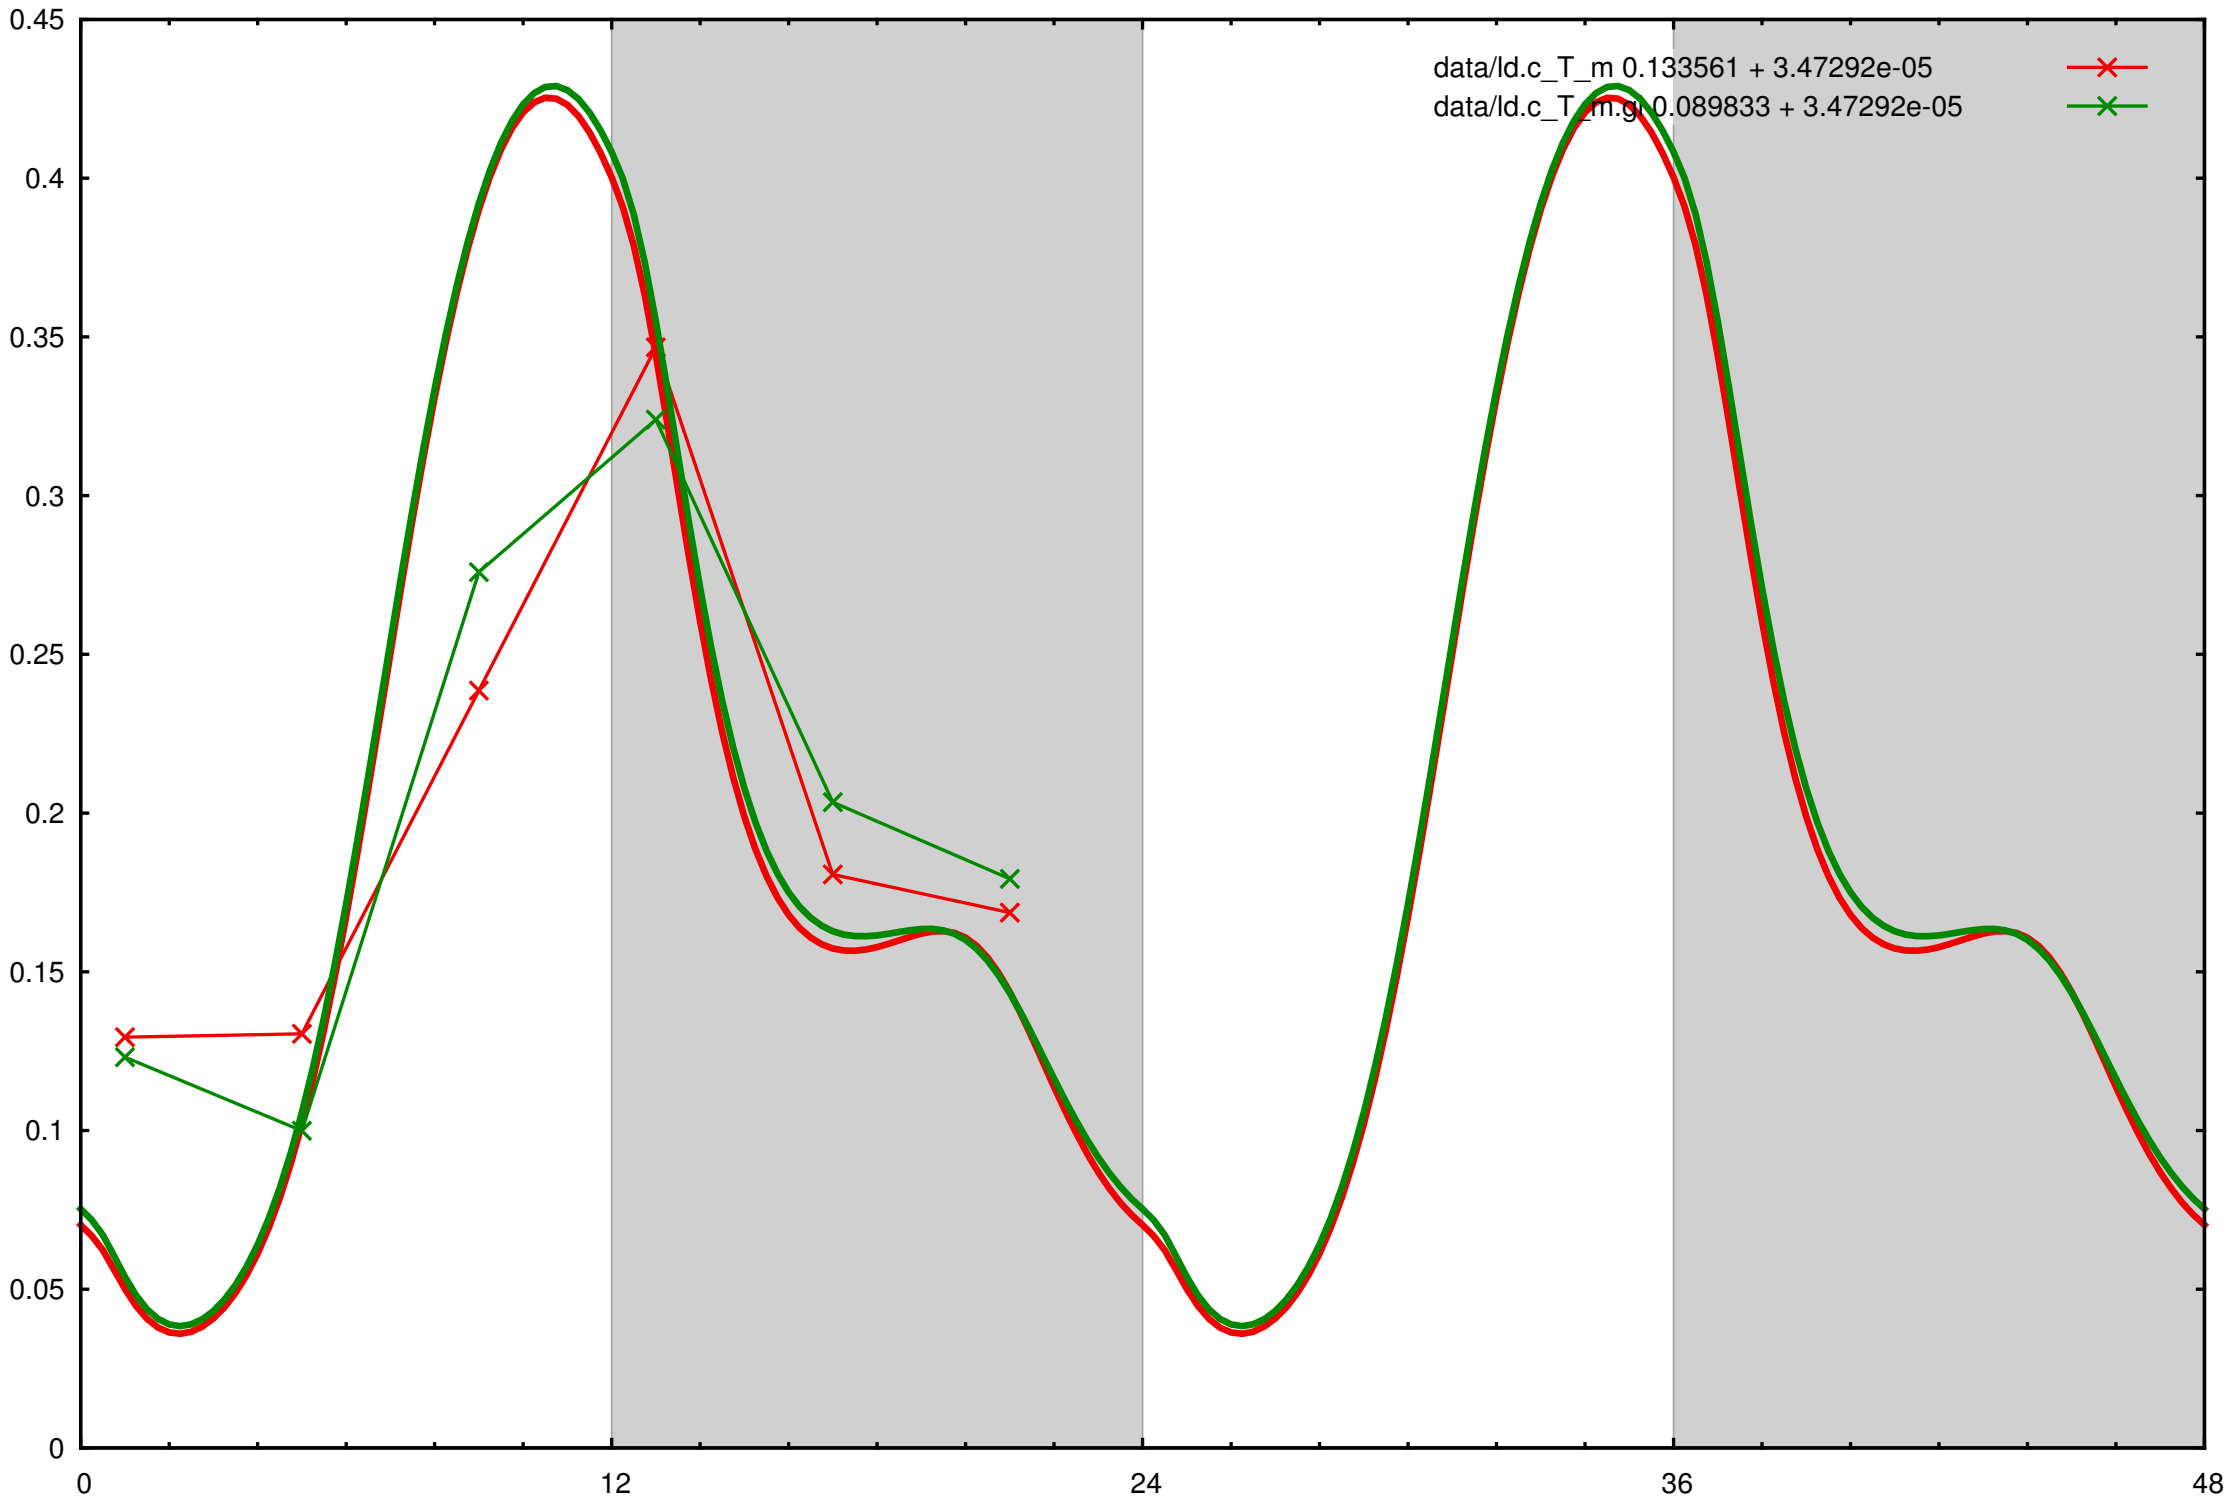

Scale group 28, scost 0.0508342

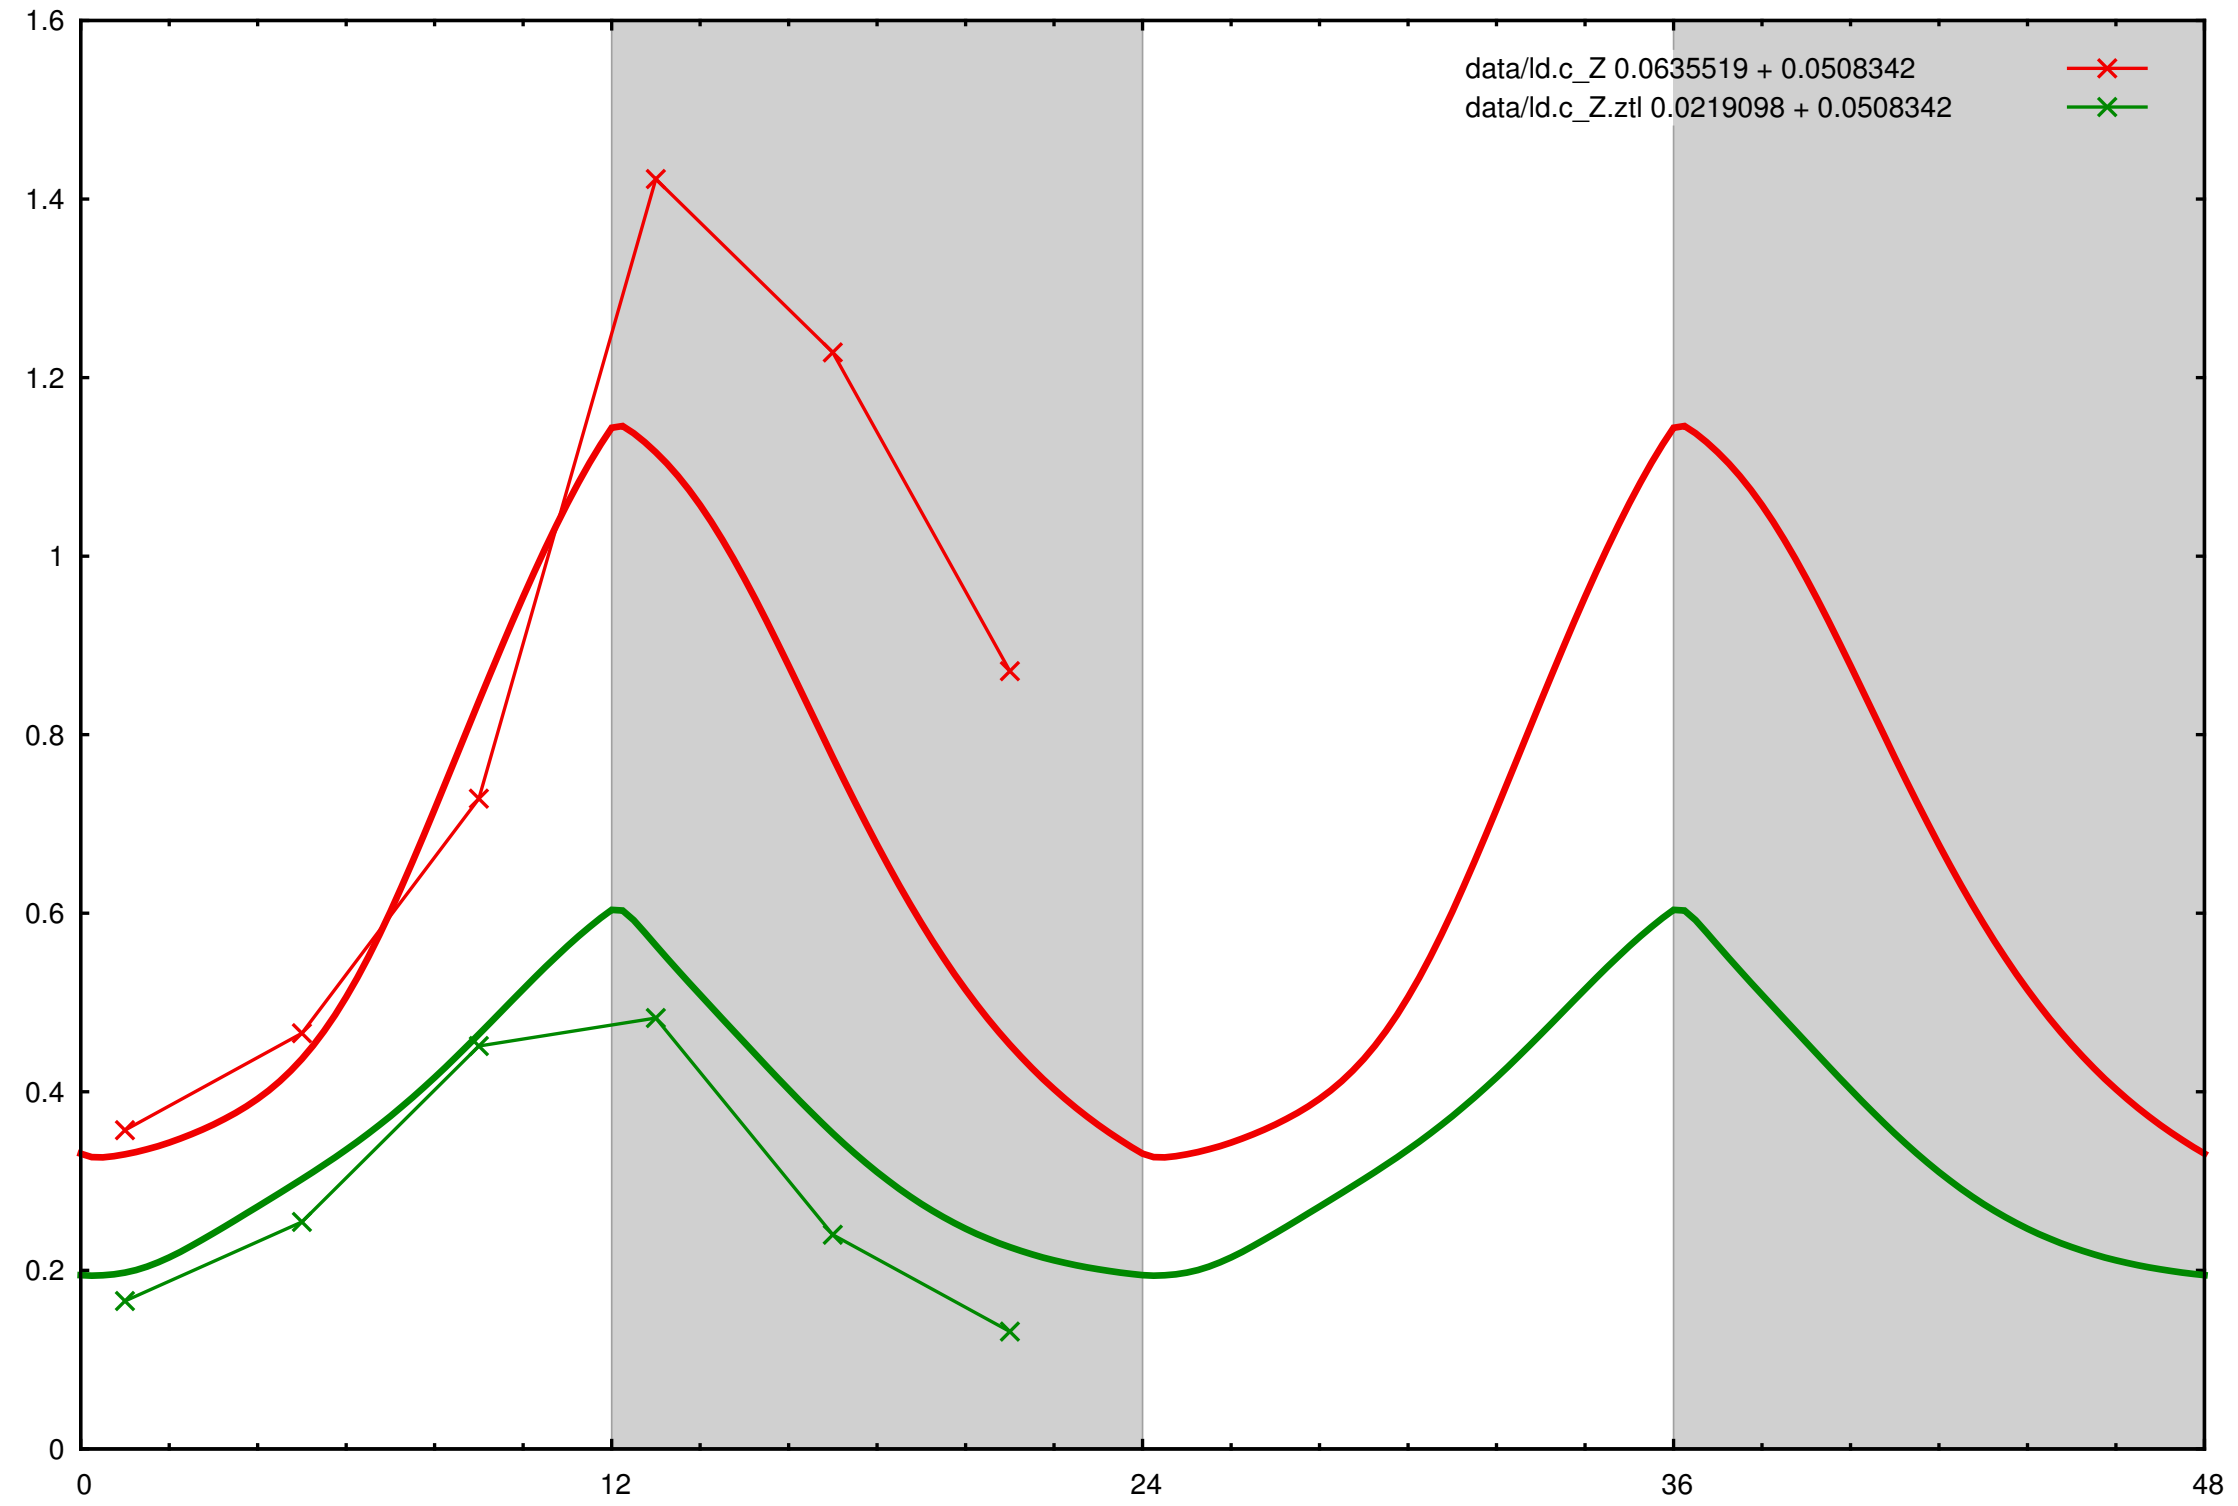

Scale group 29, scost 0.0026435

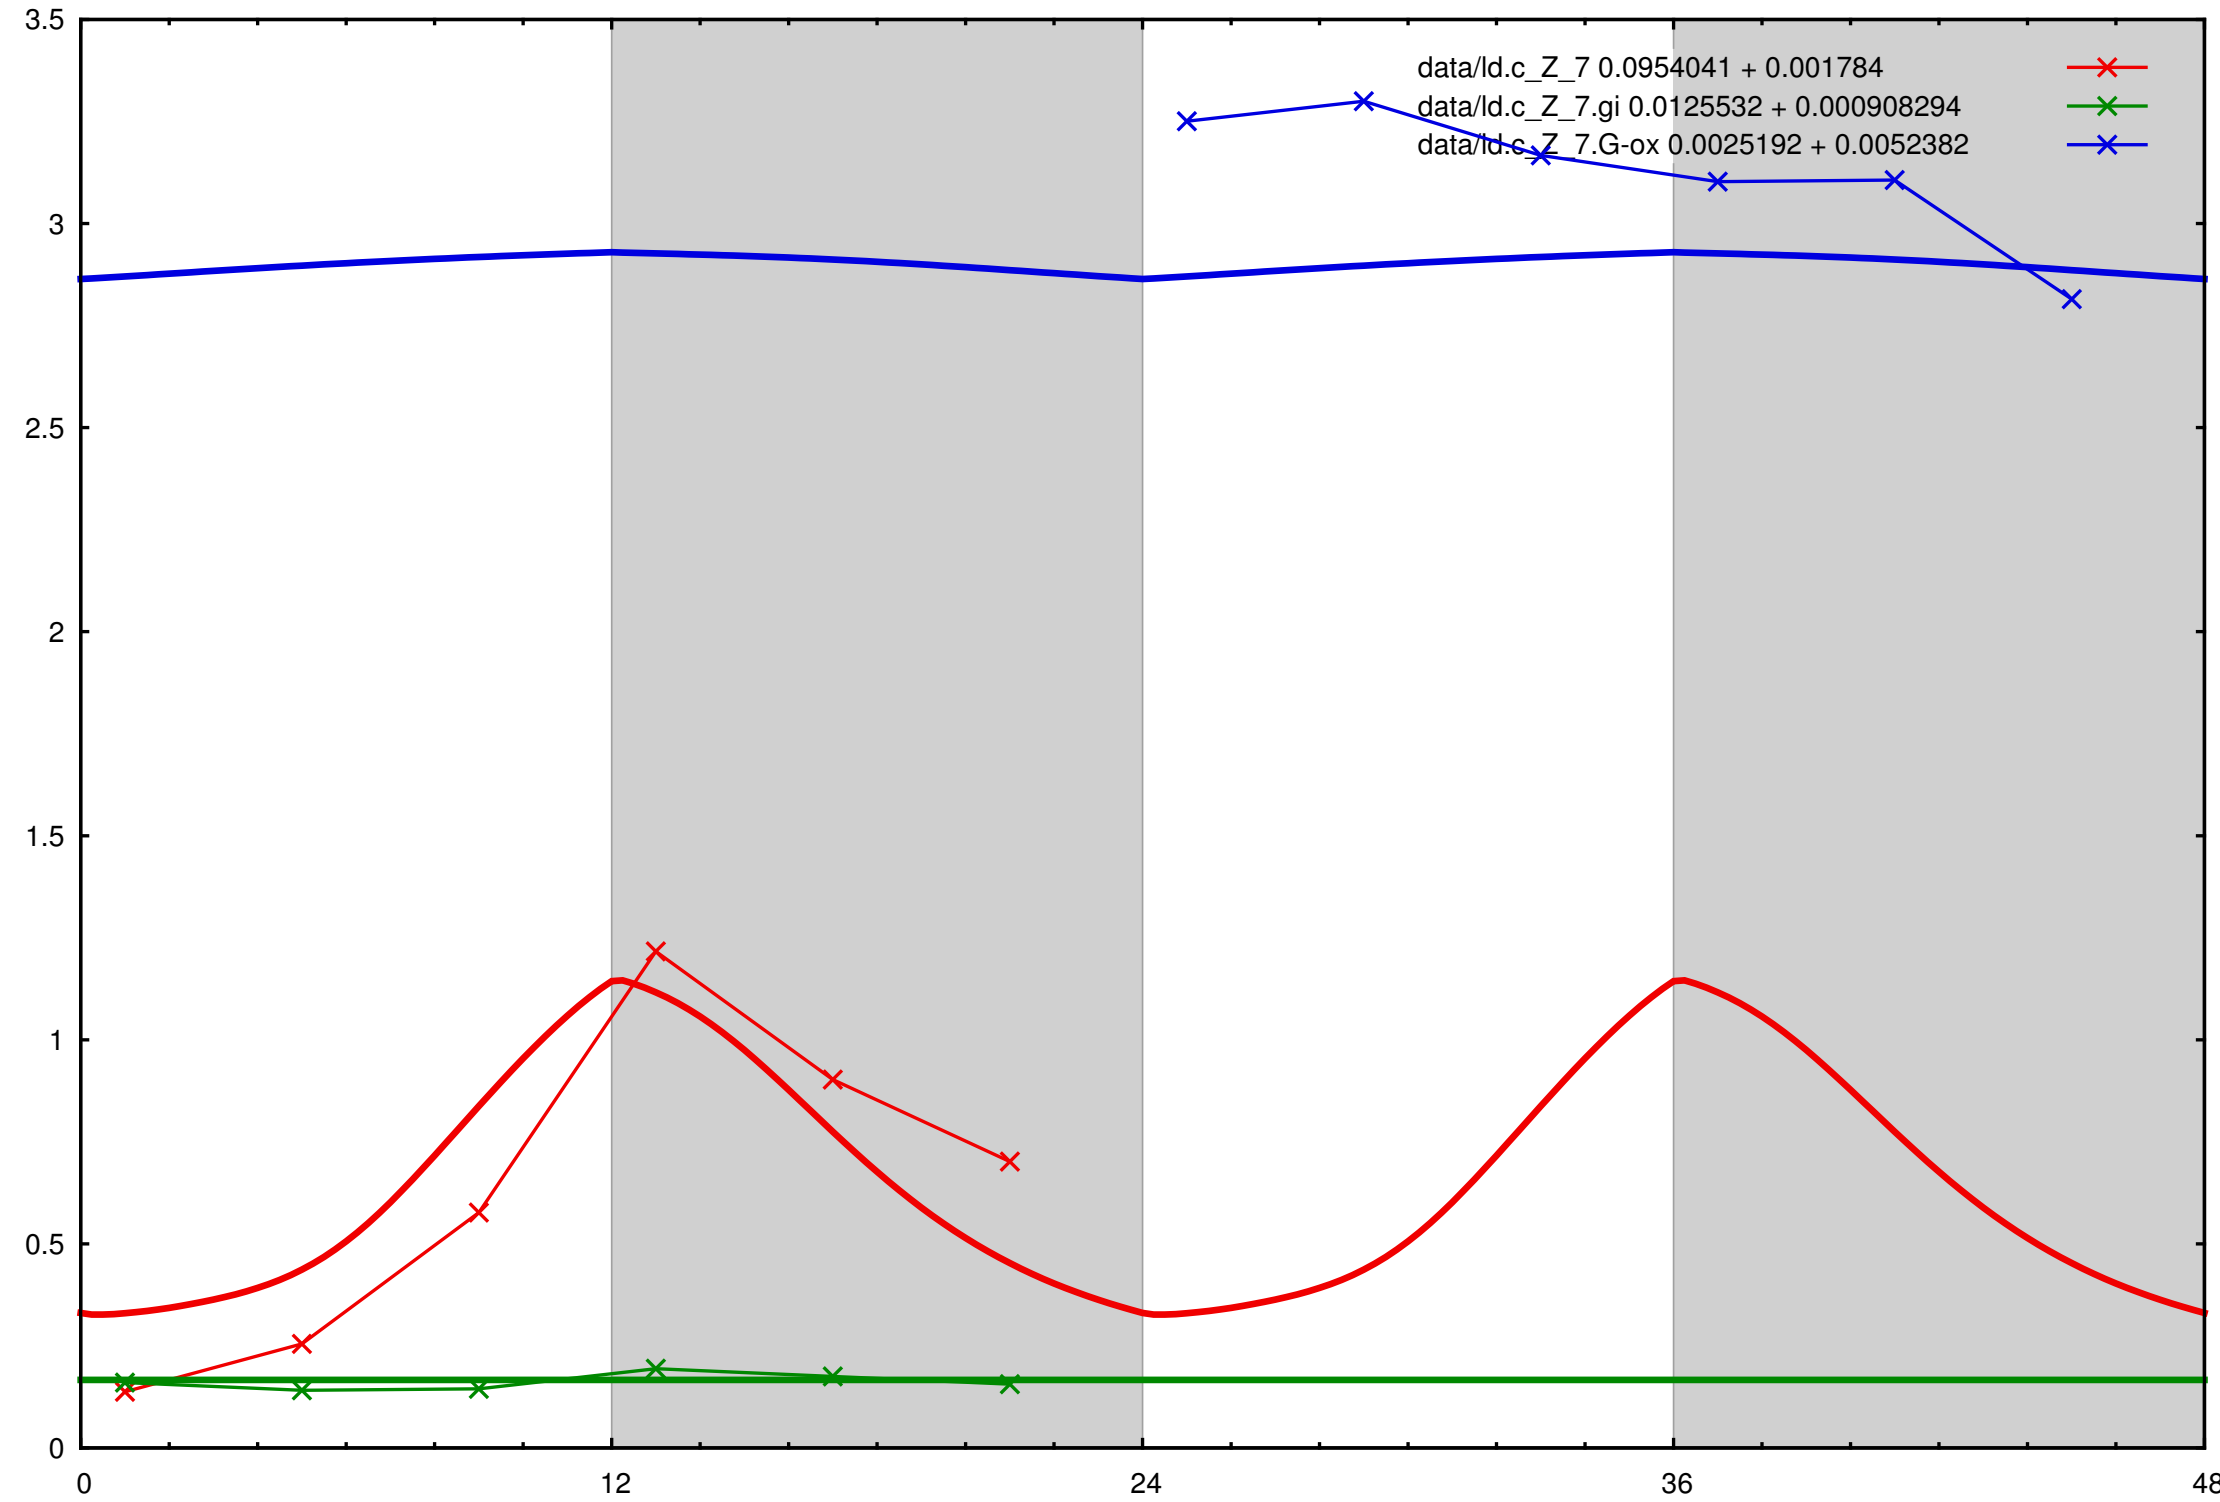

Scale group 30, scost 0.125163

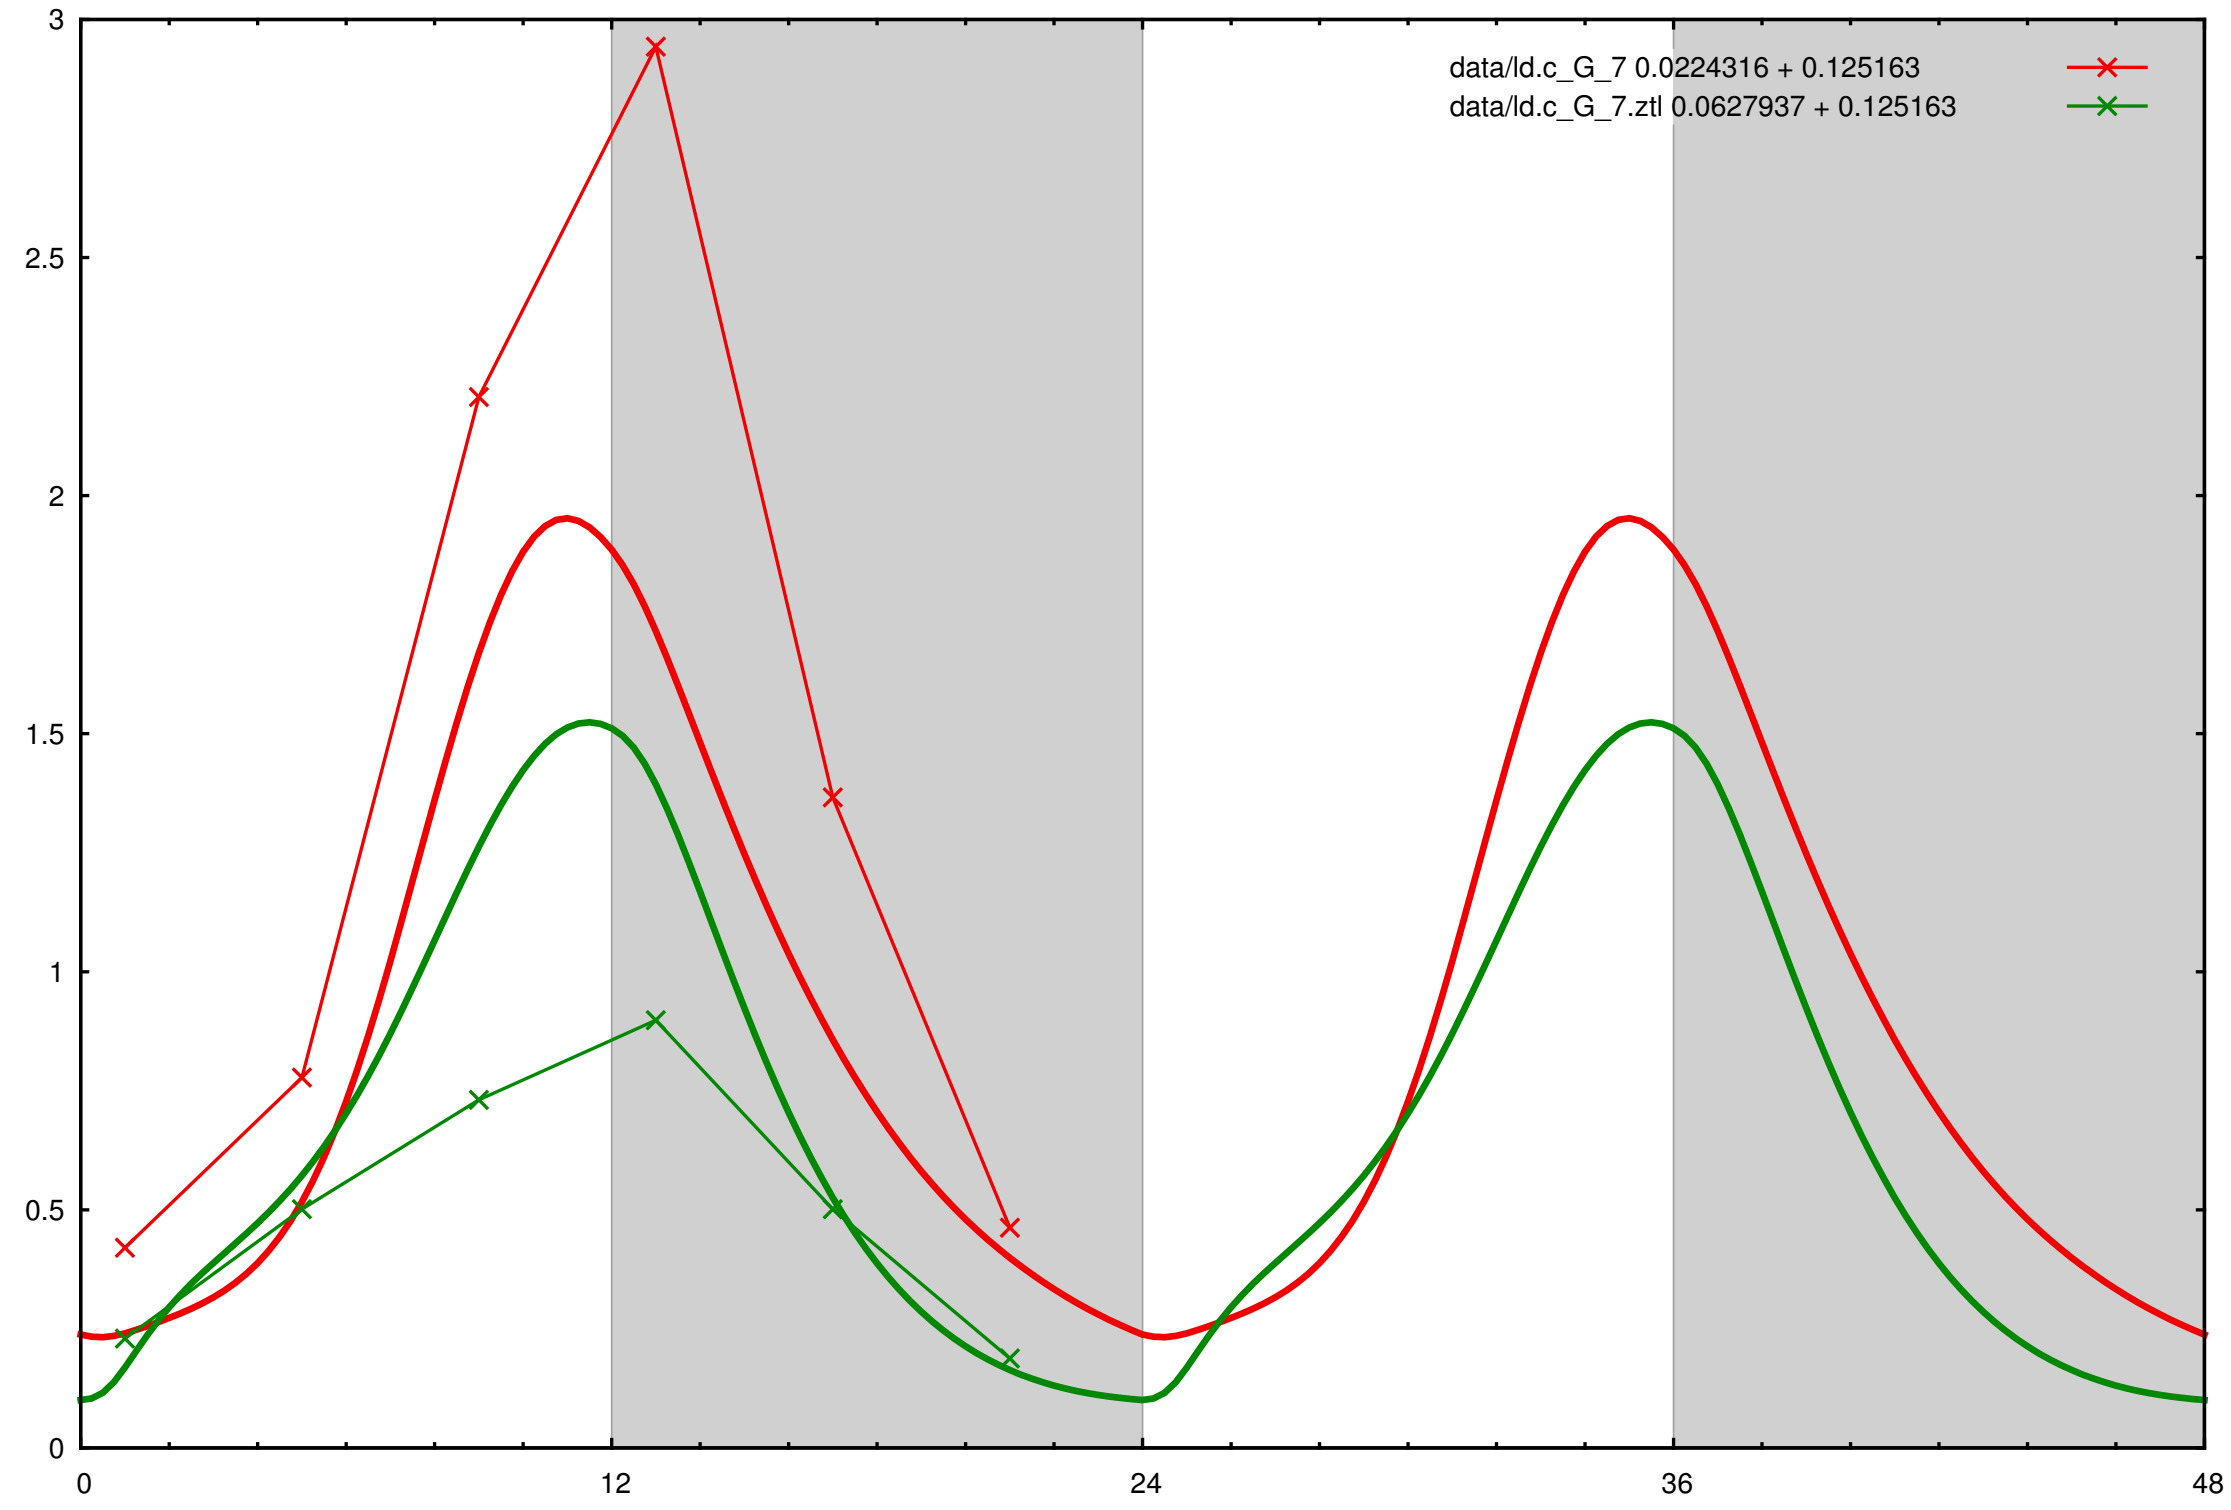

Scale group 31, scost 0.00200656

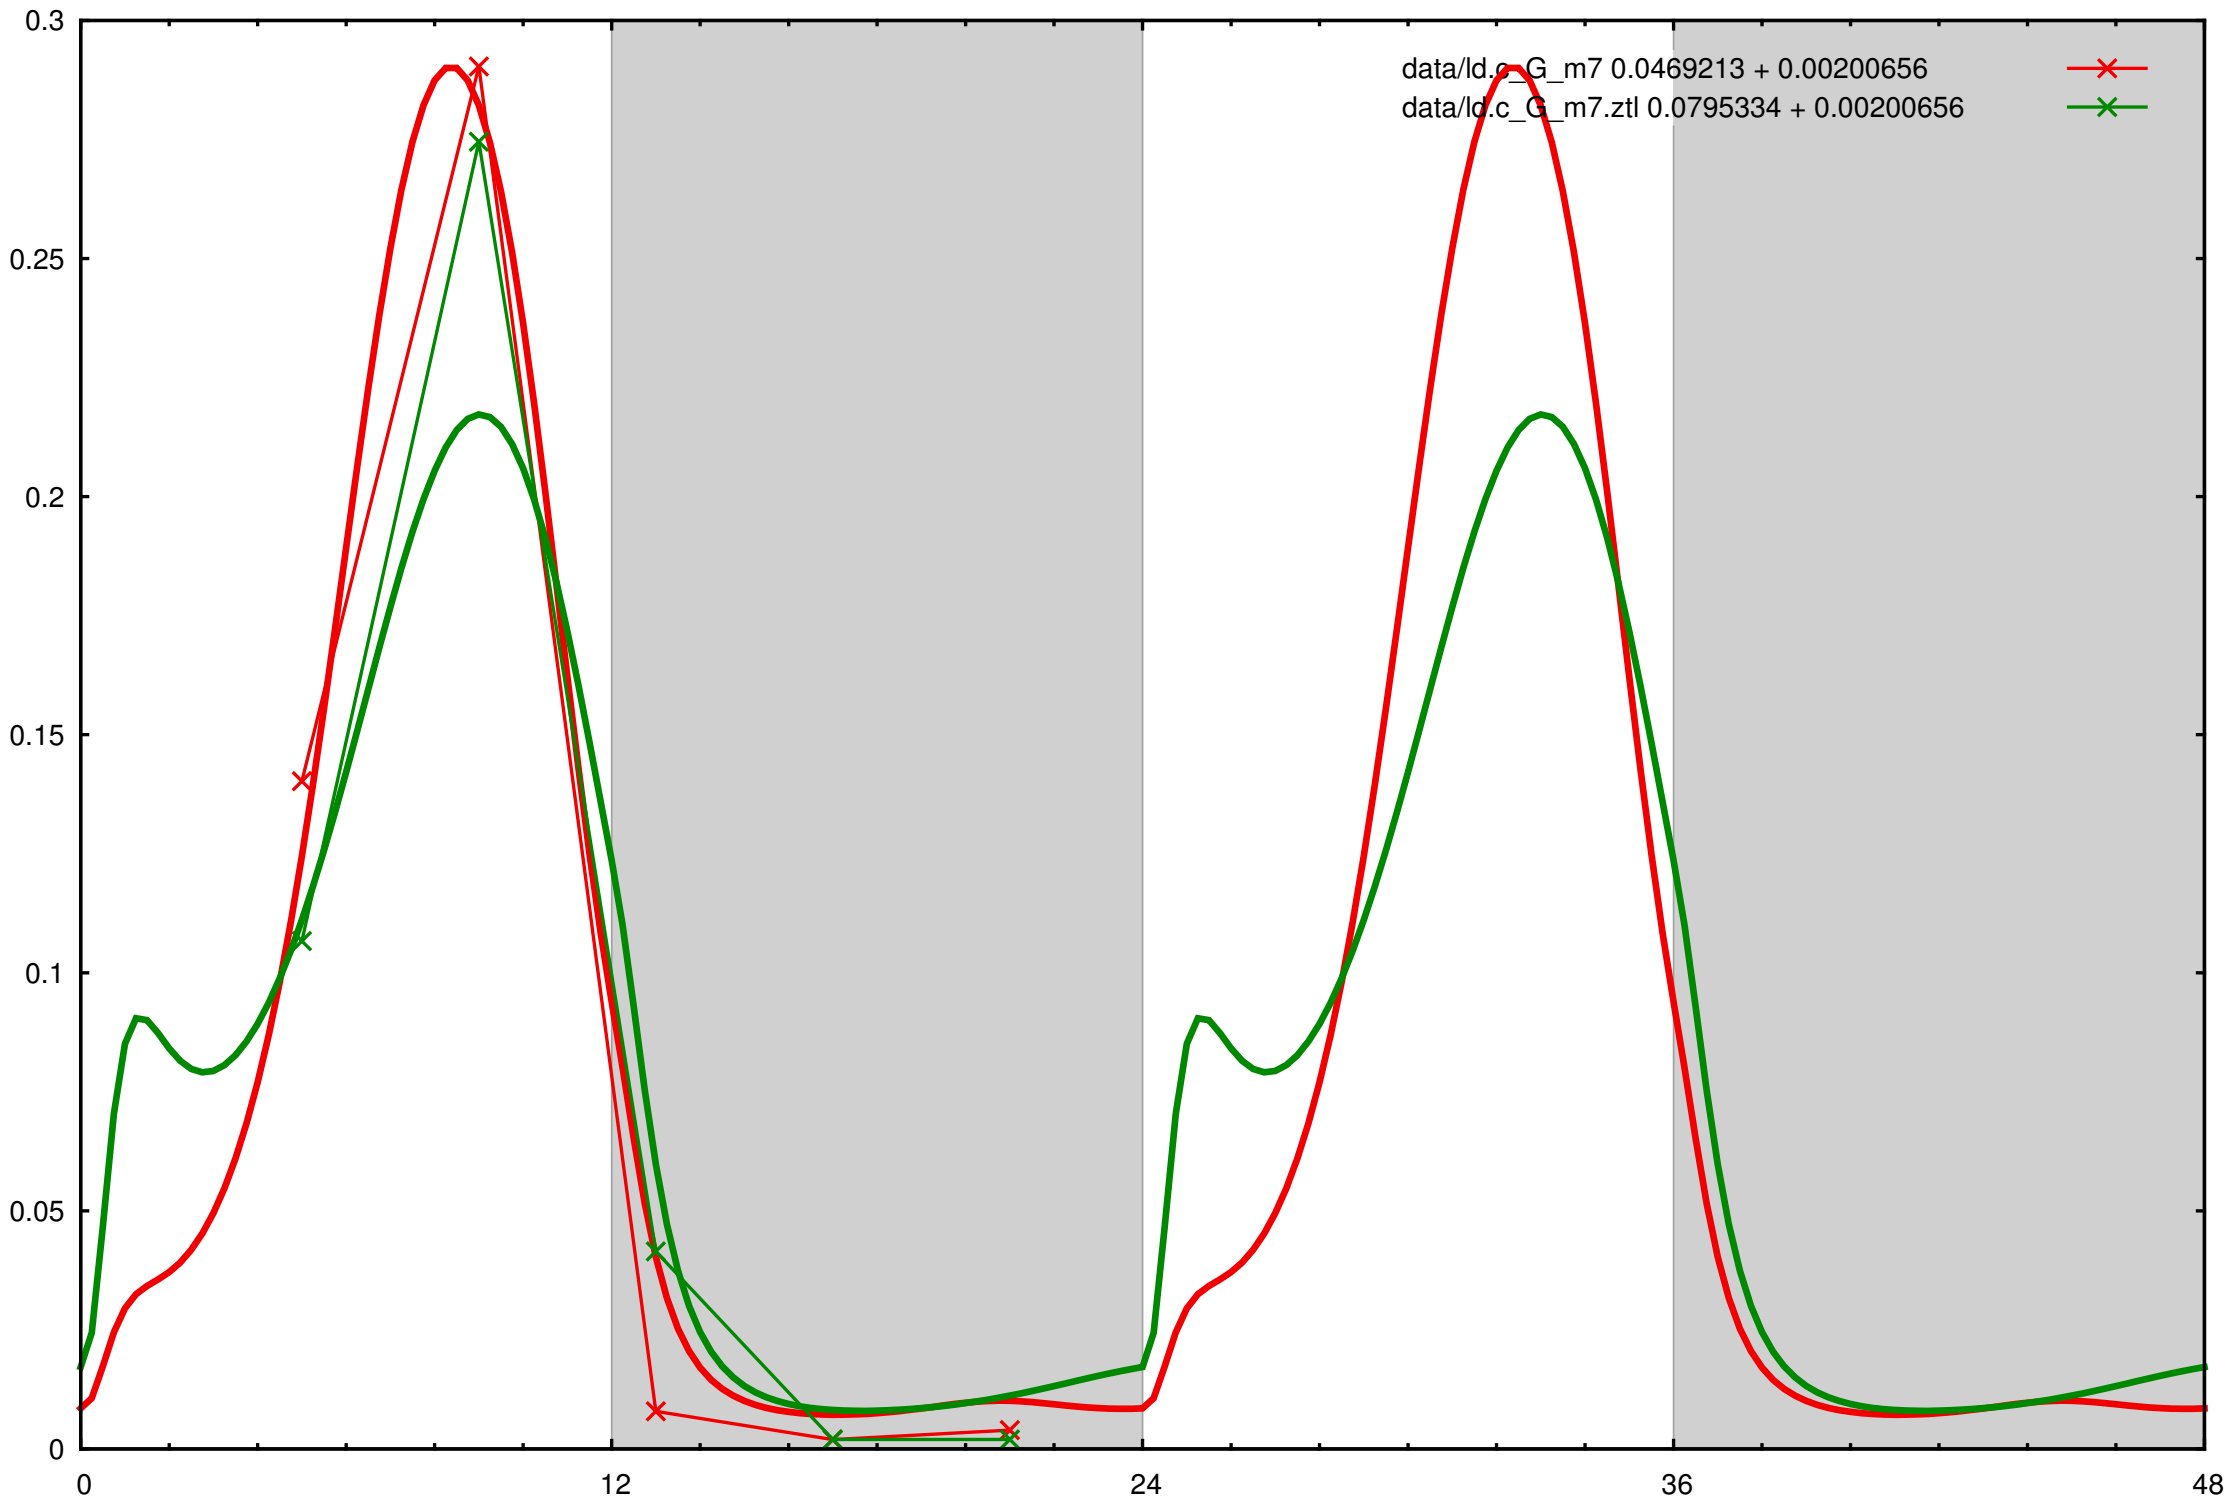

Scale group 32, scost 0.189026

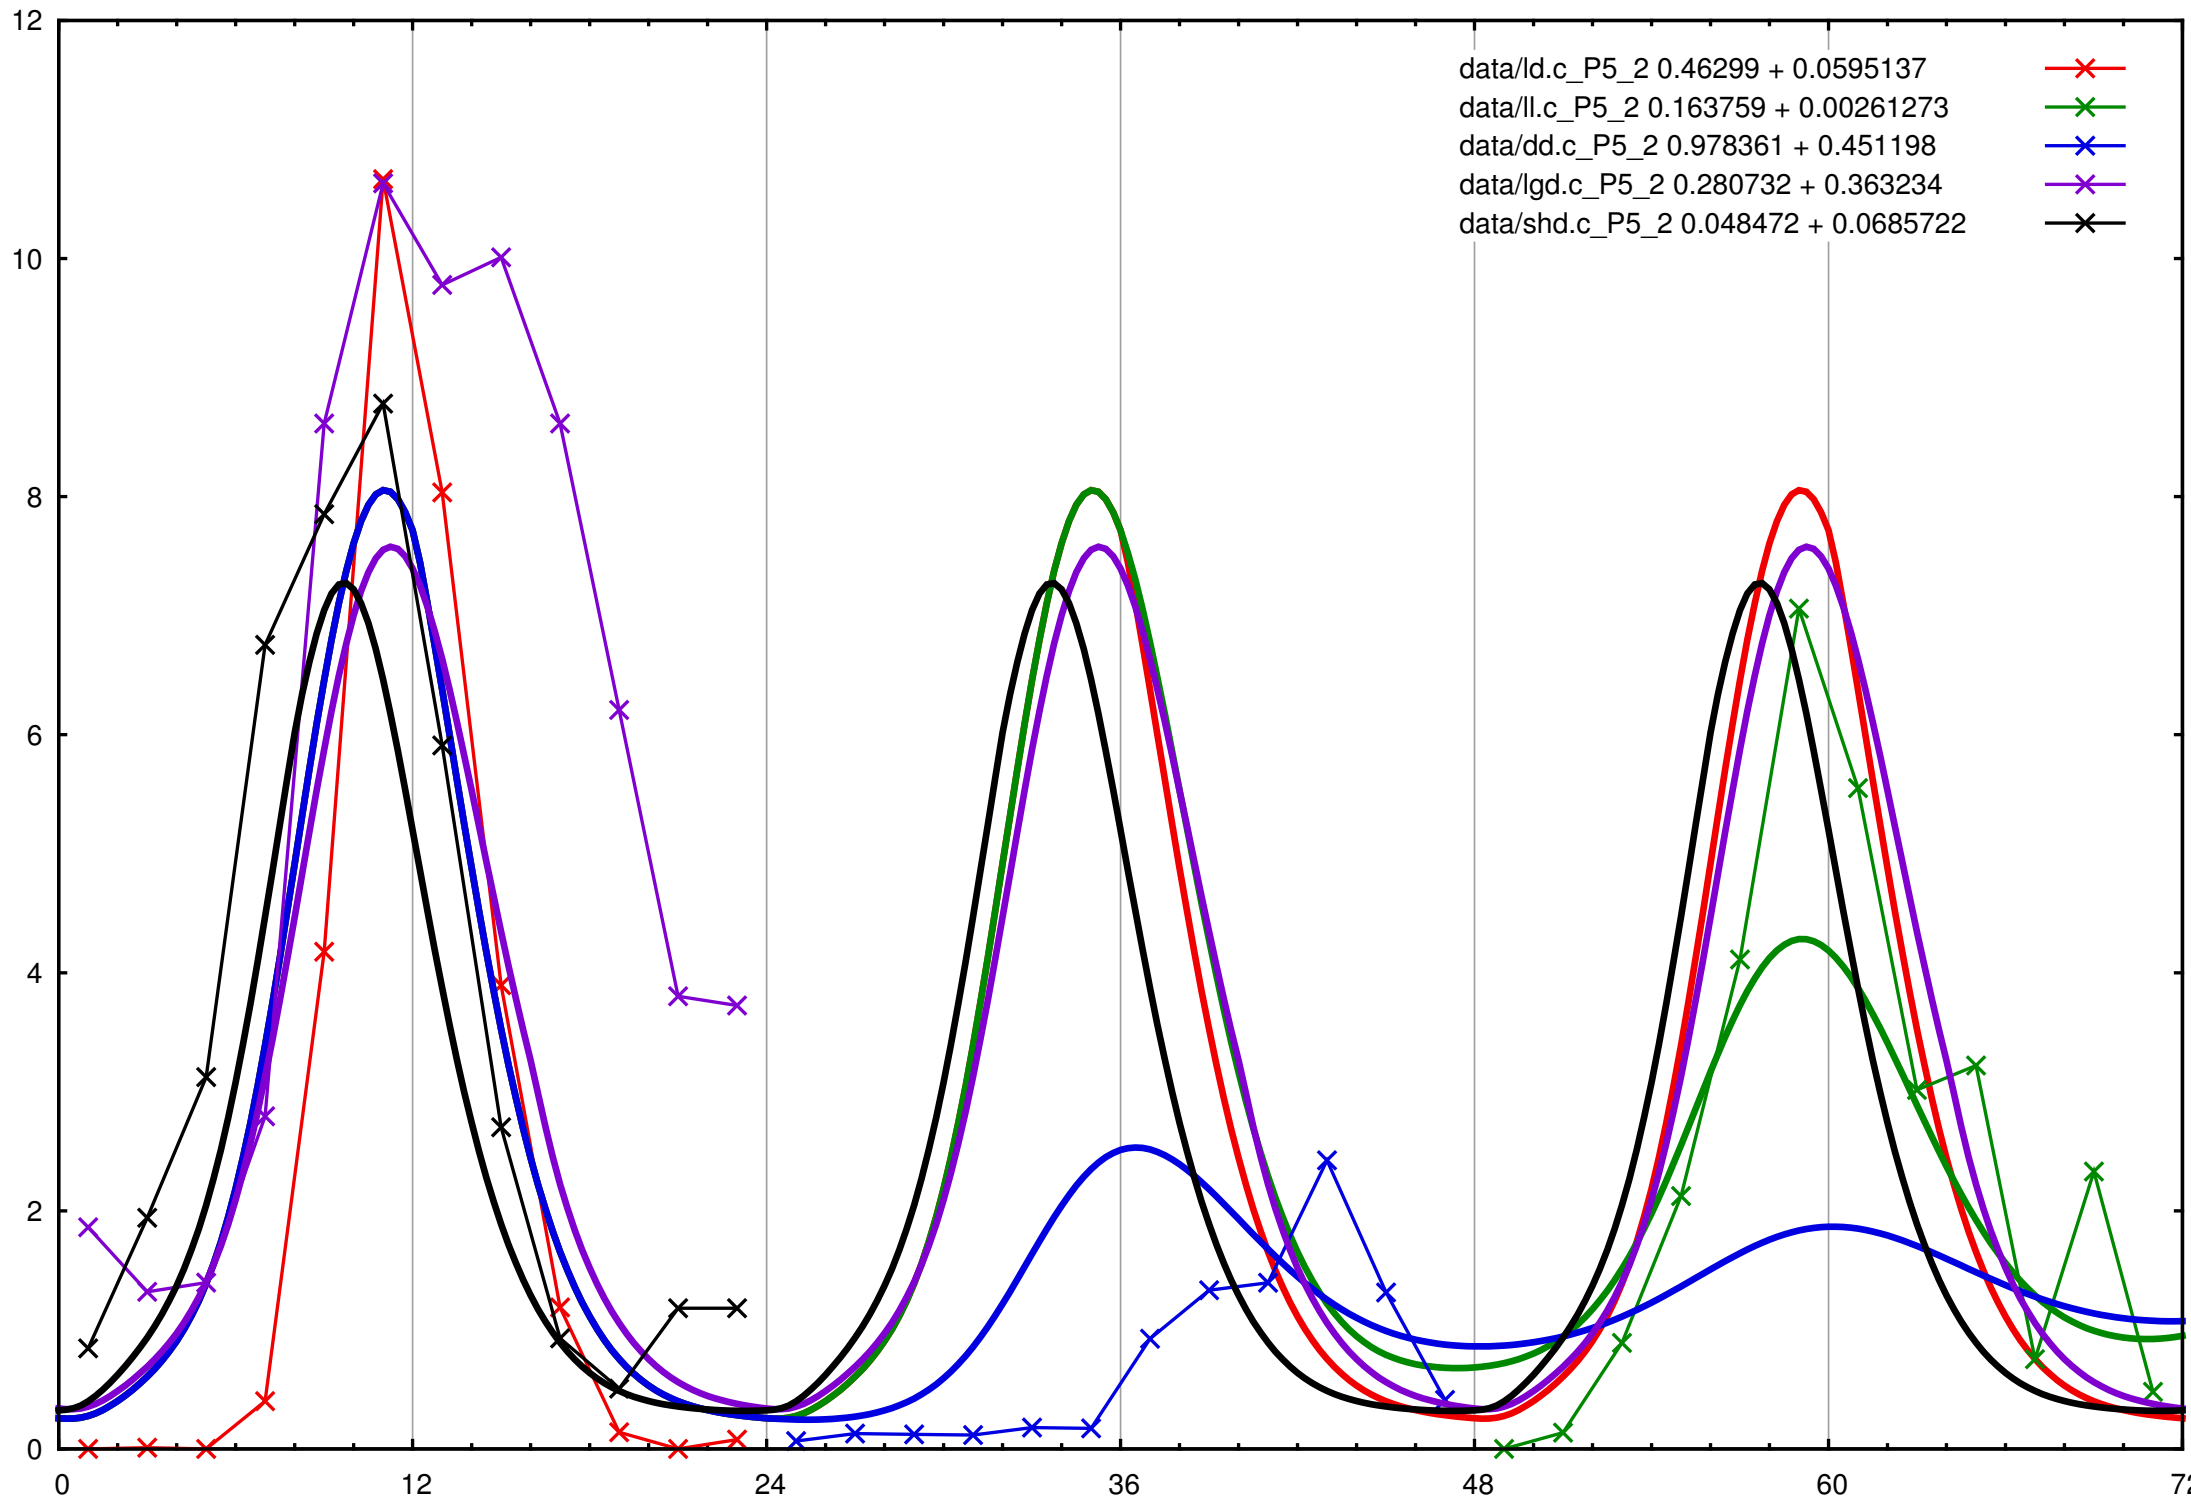



Scale group 33, scost 0.0659352

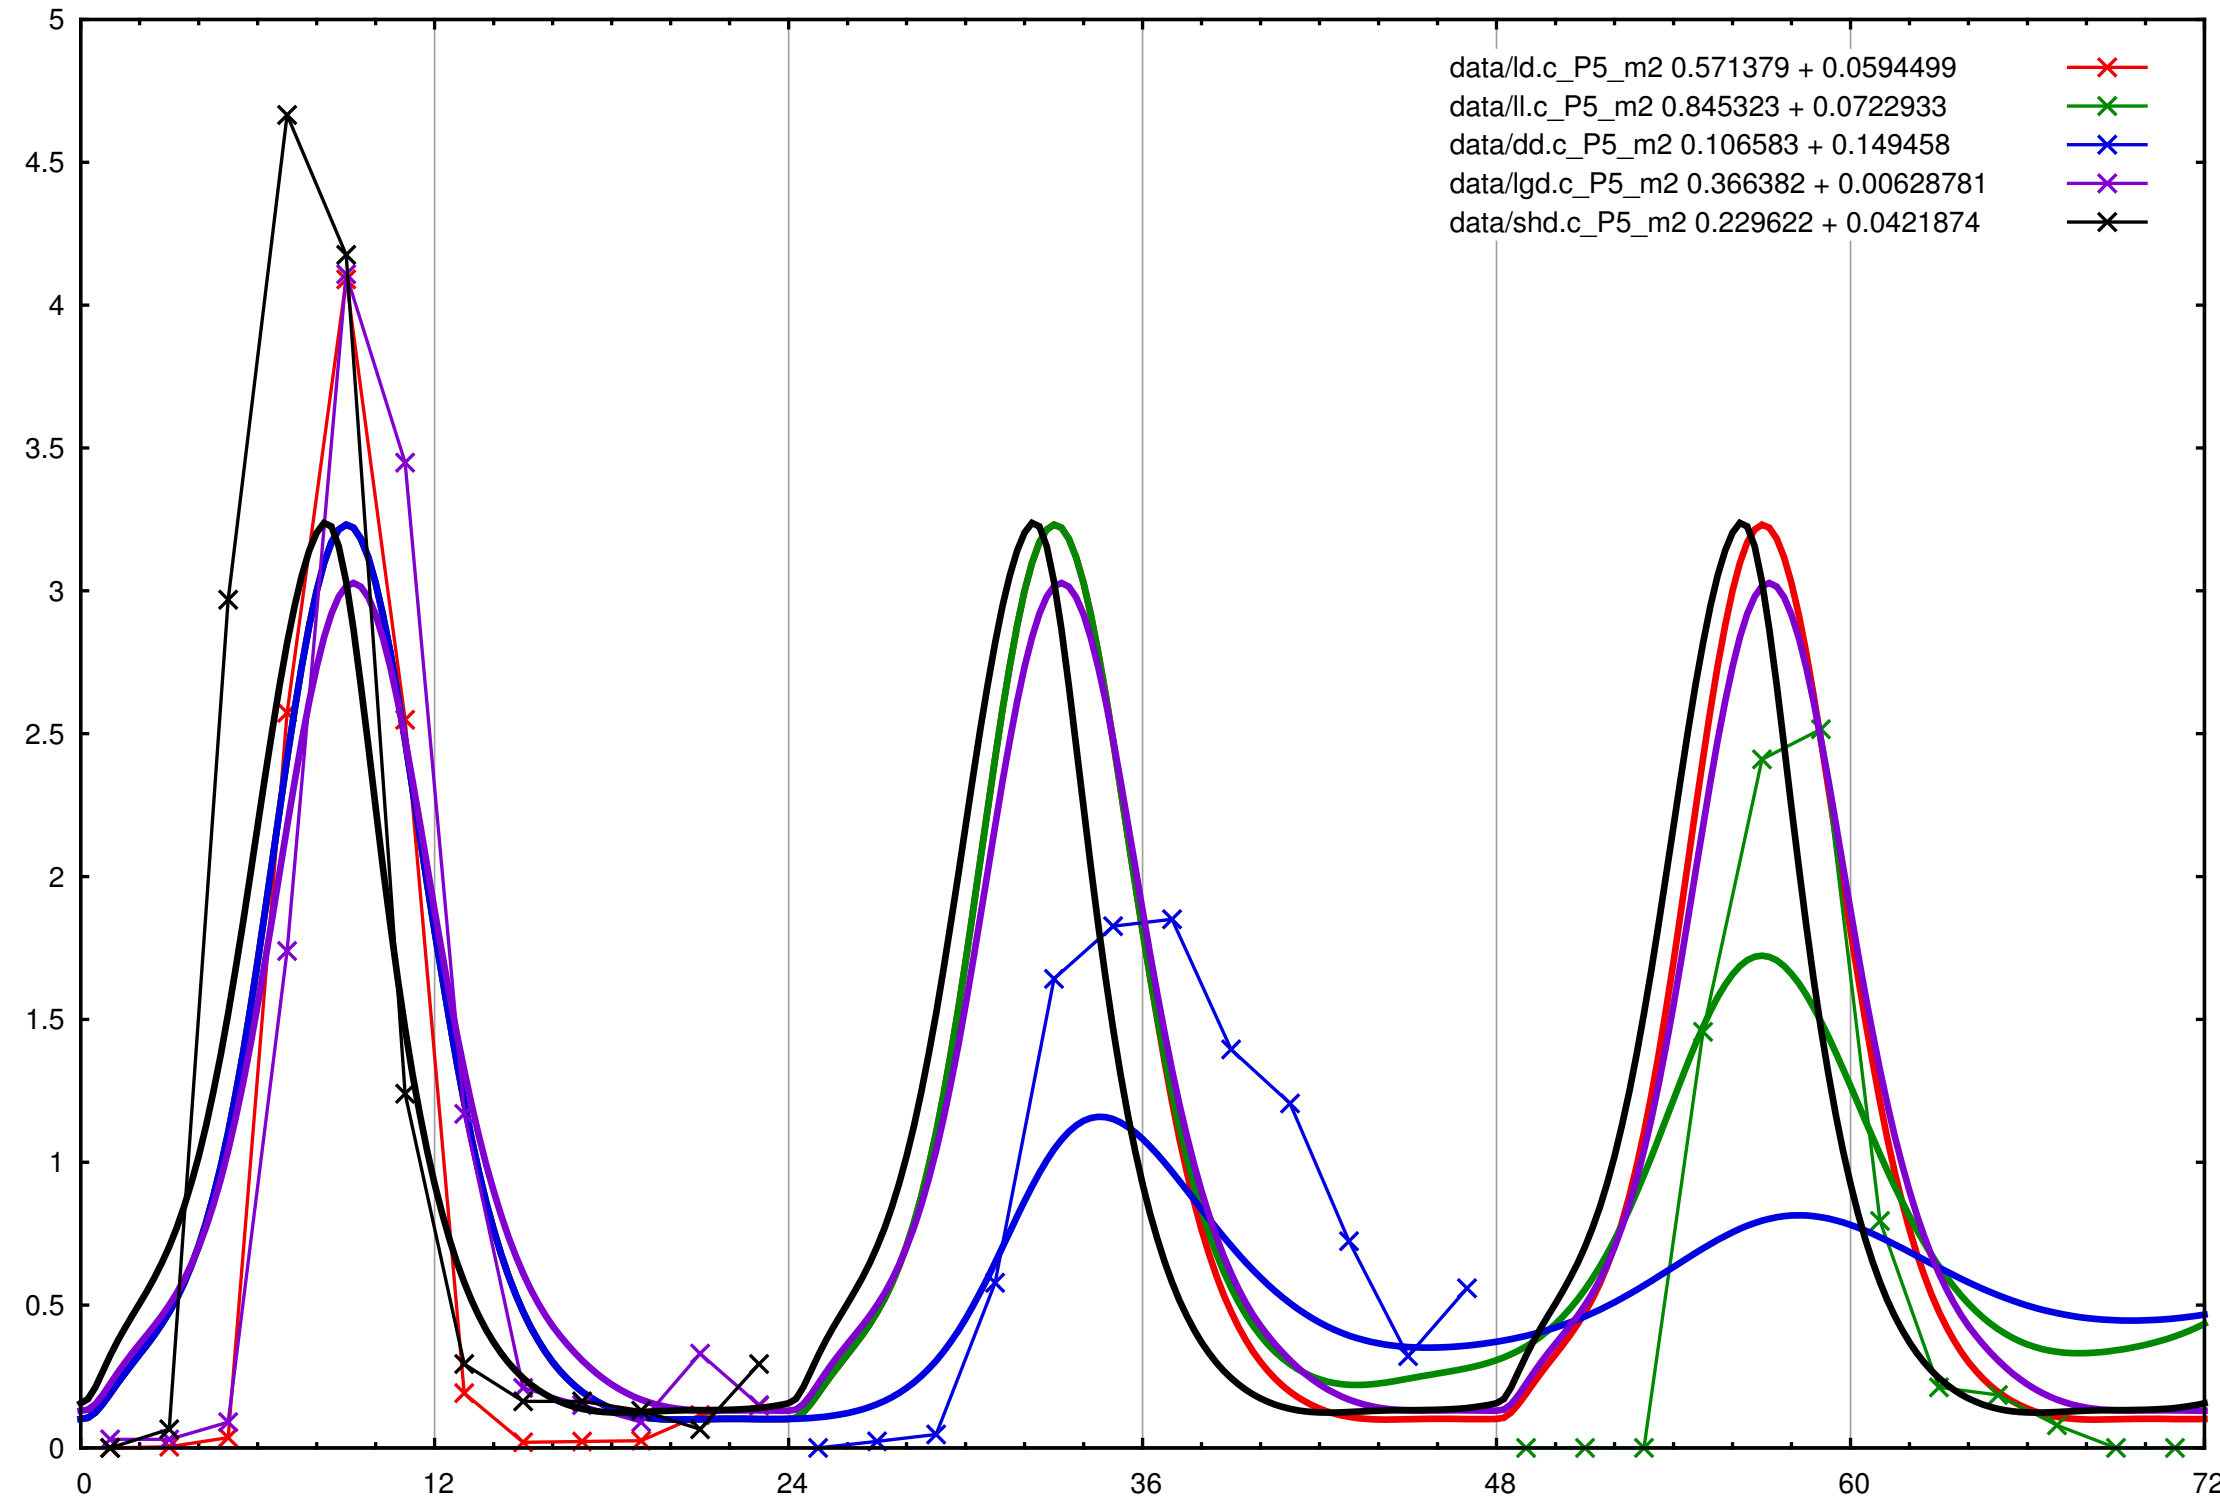

Scale group 34, scost 0.11998

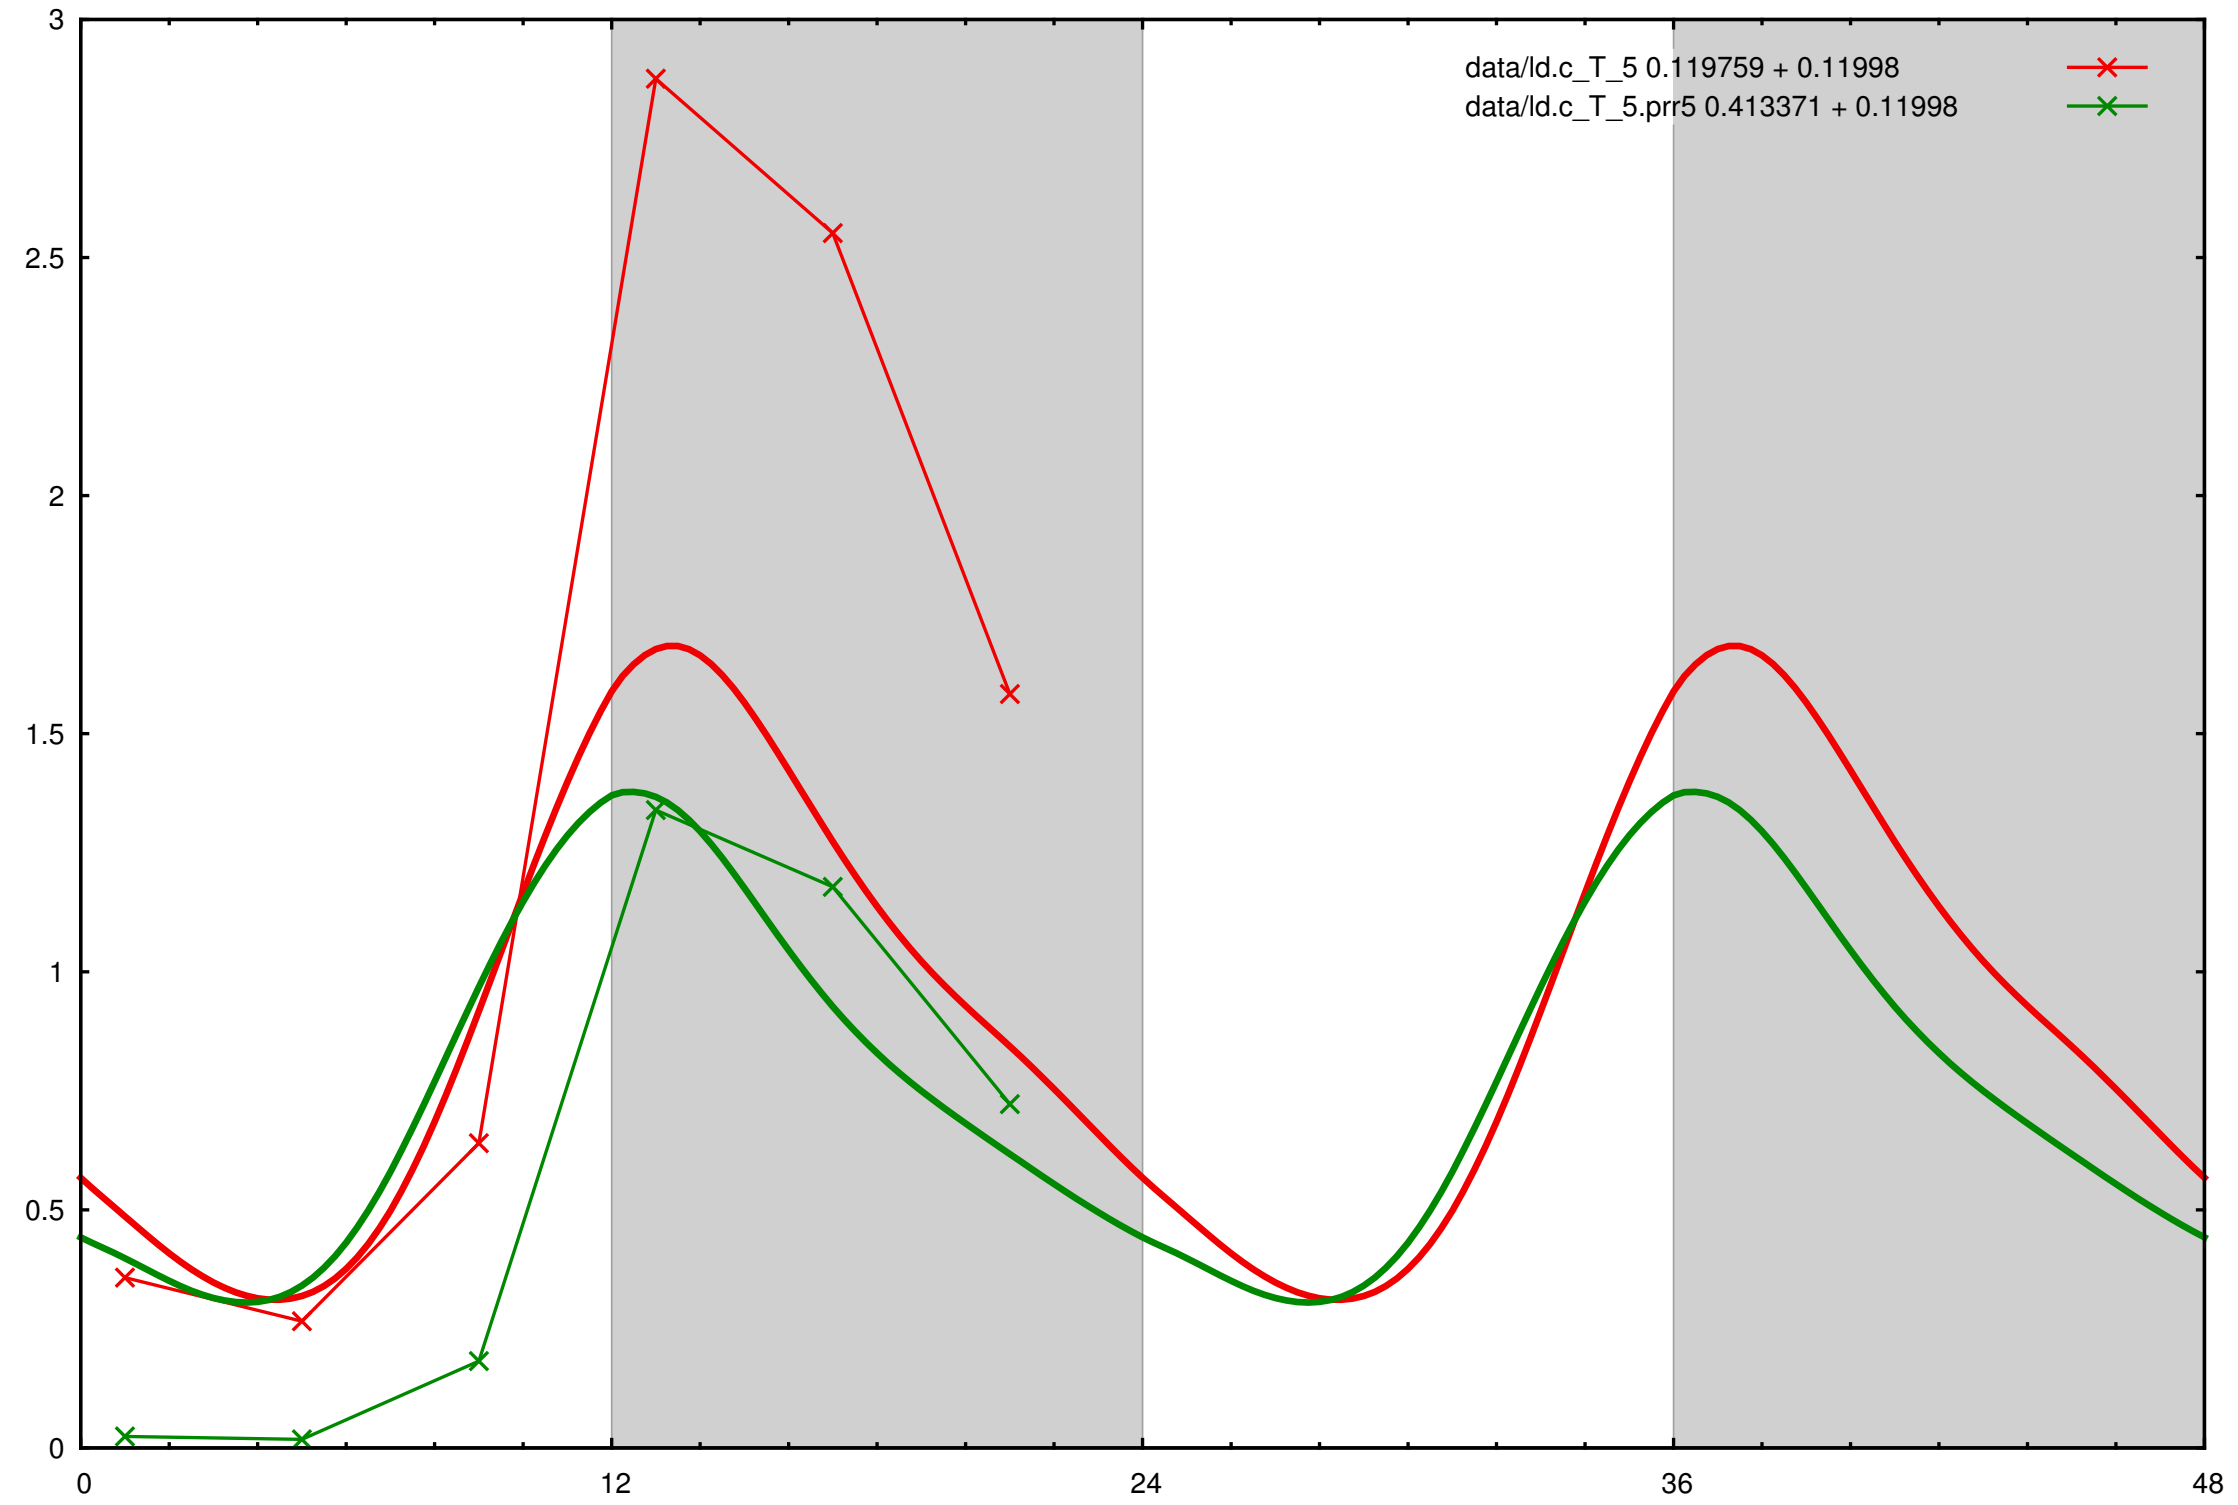

Scale group 35, scost 4.40557e-06

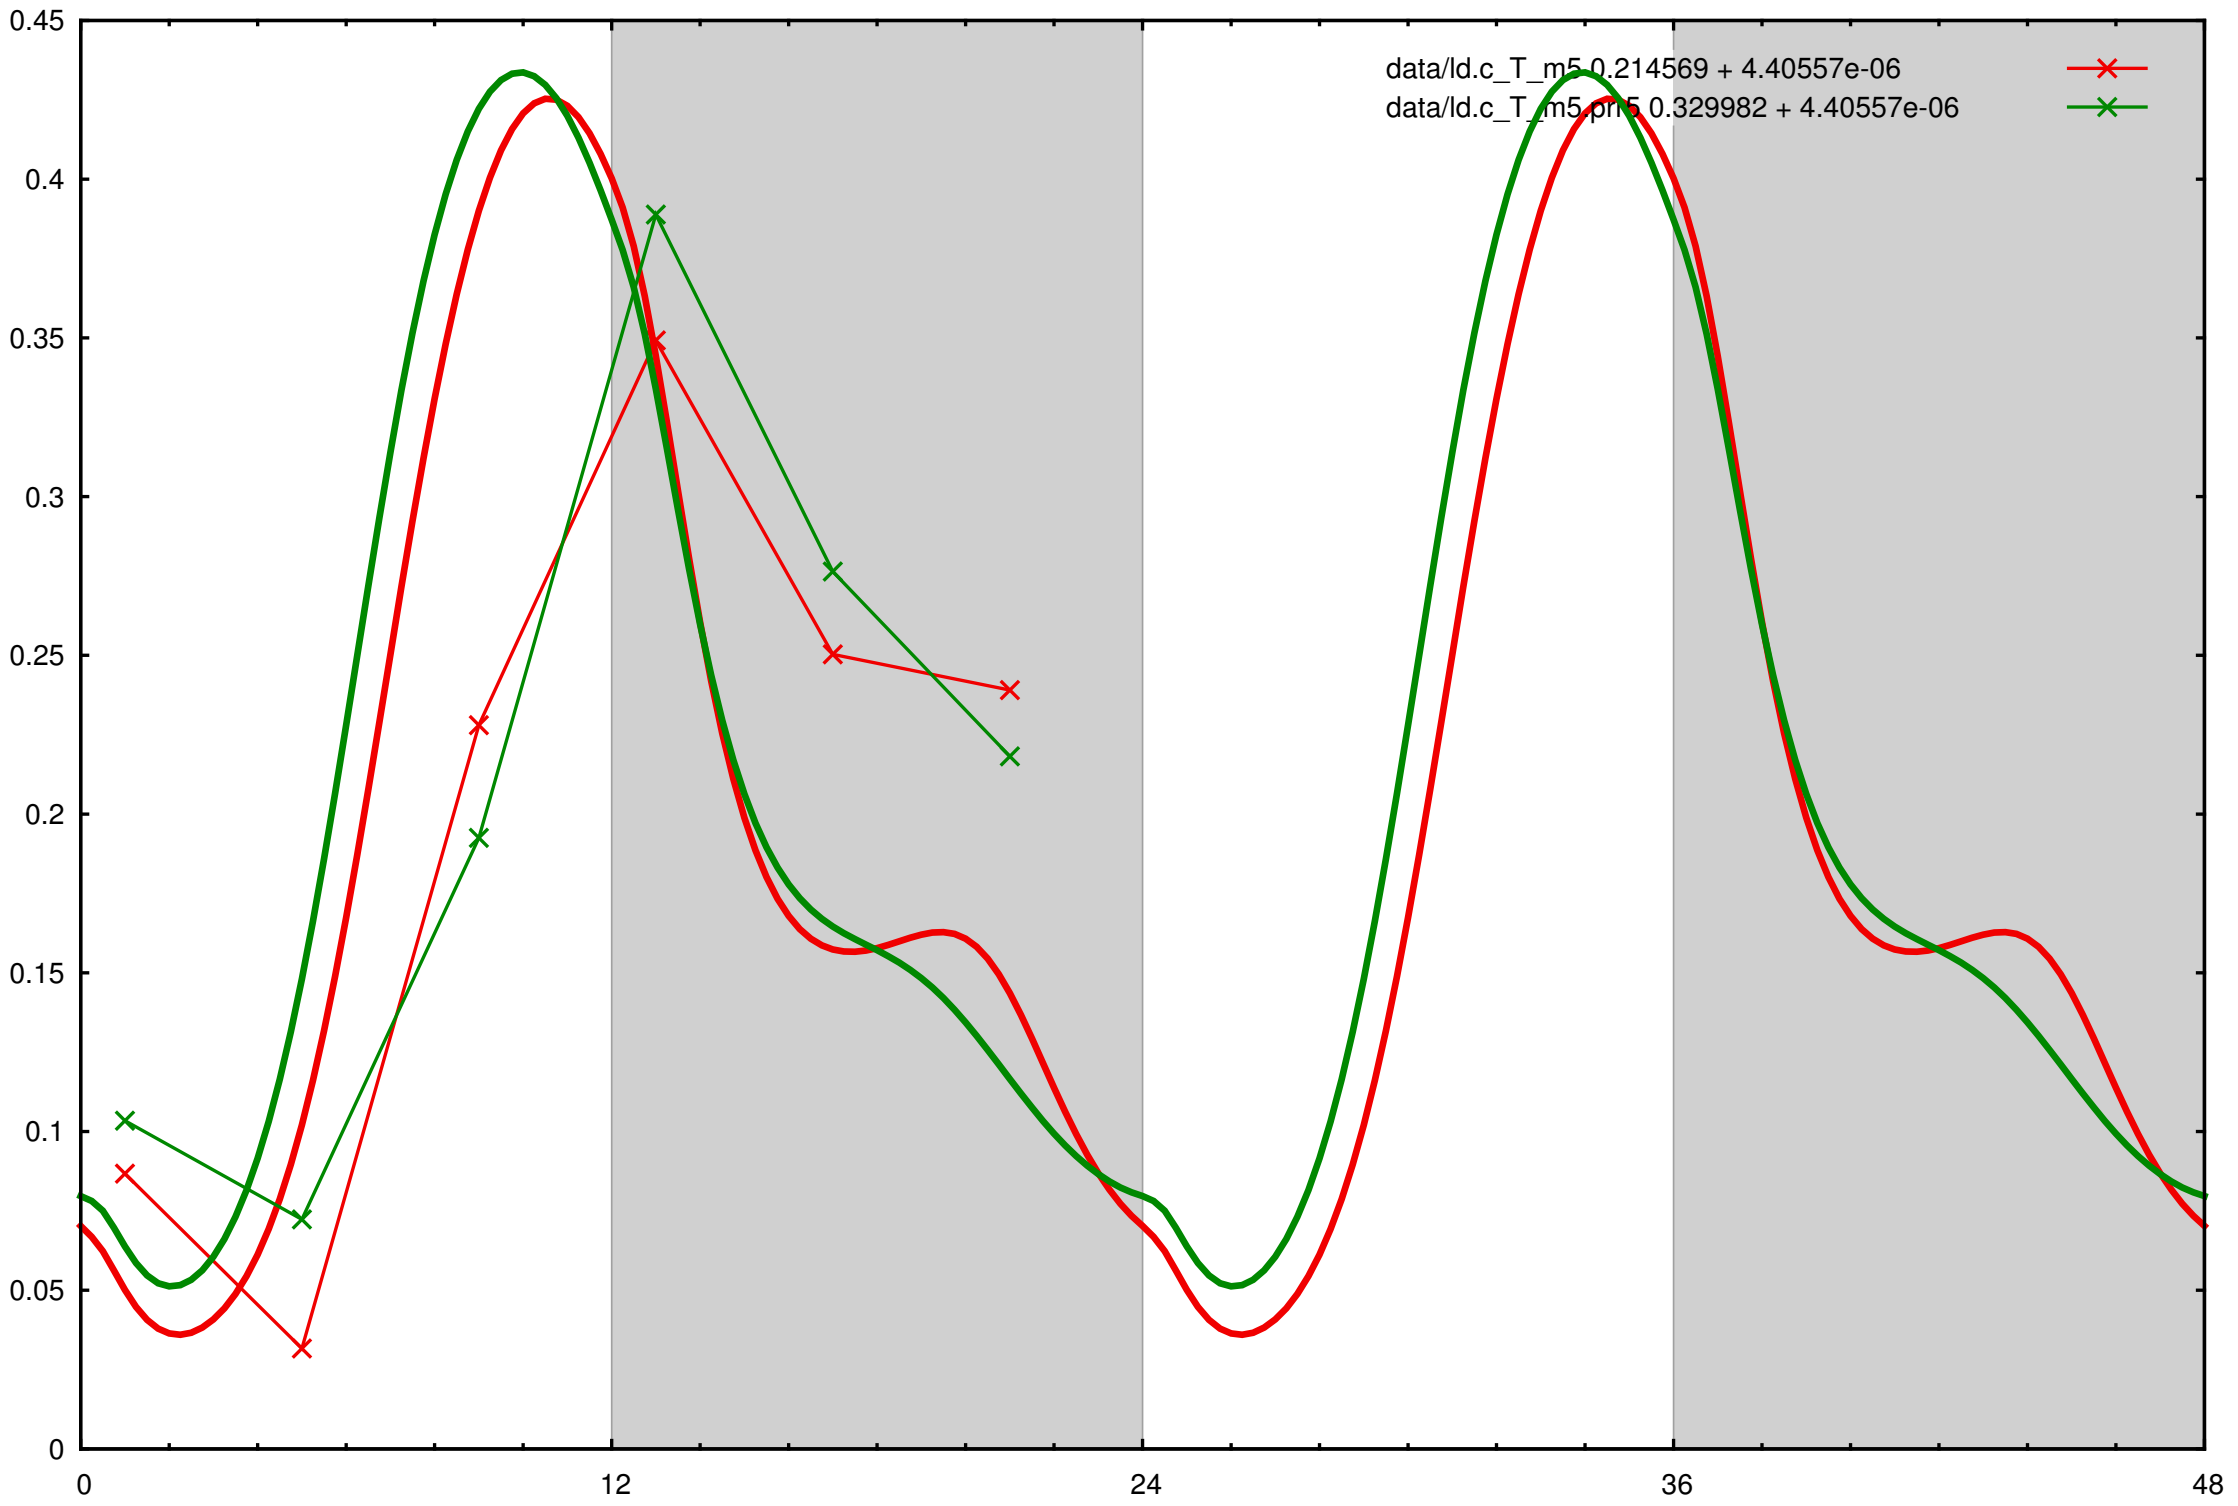

Scale group 36, scost 0.0012083

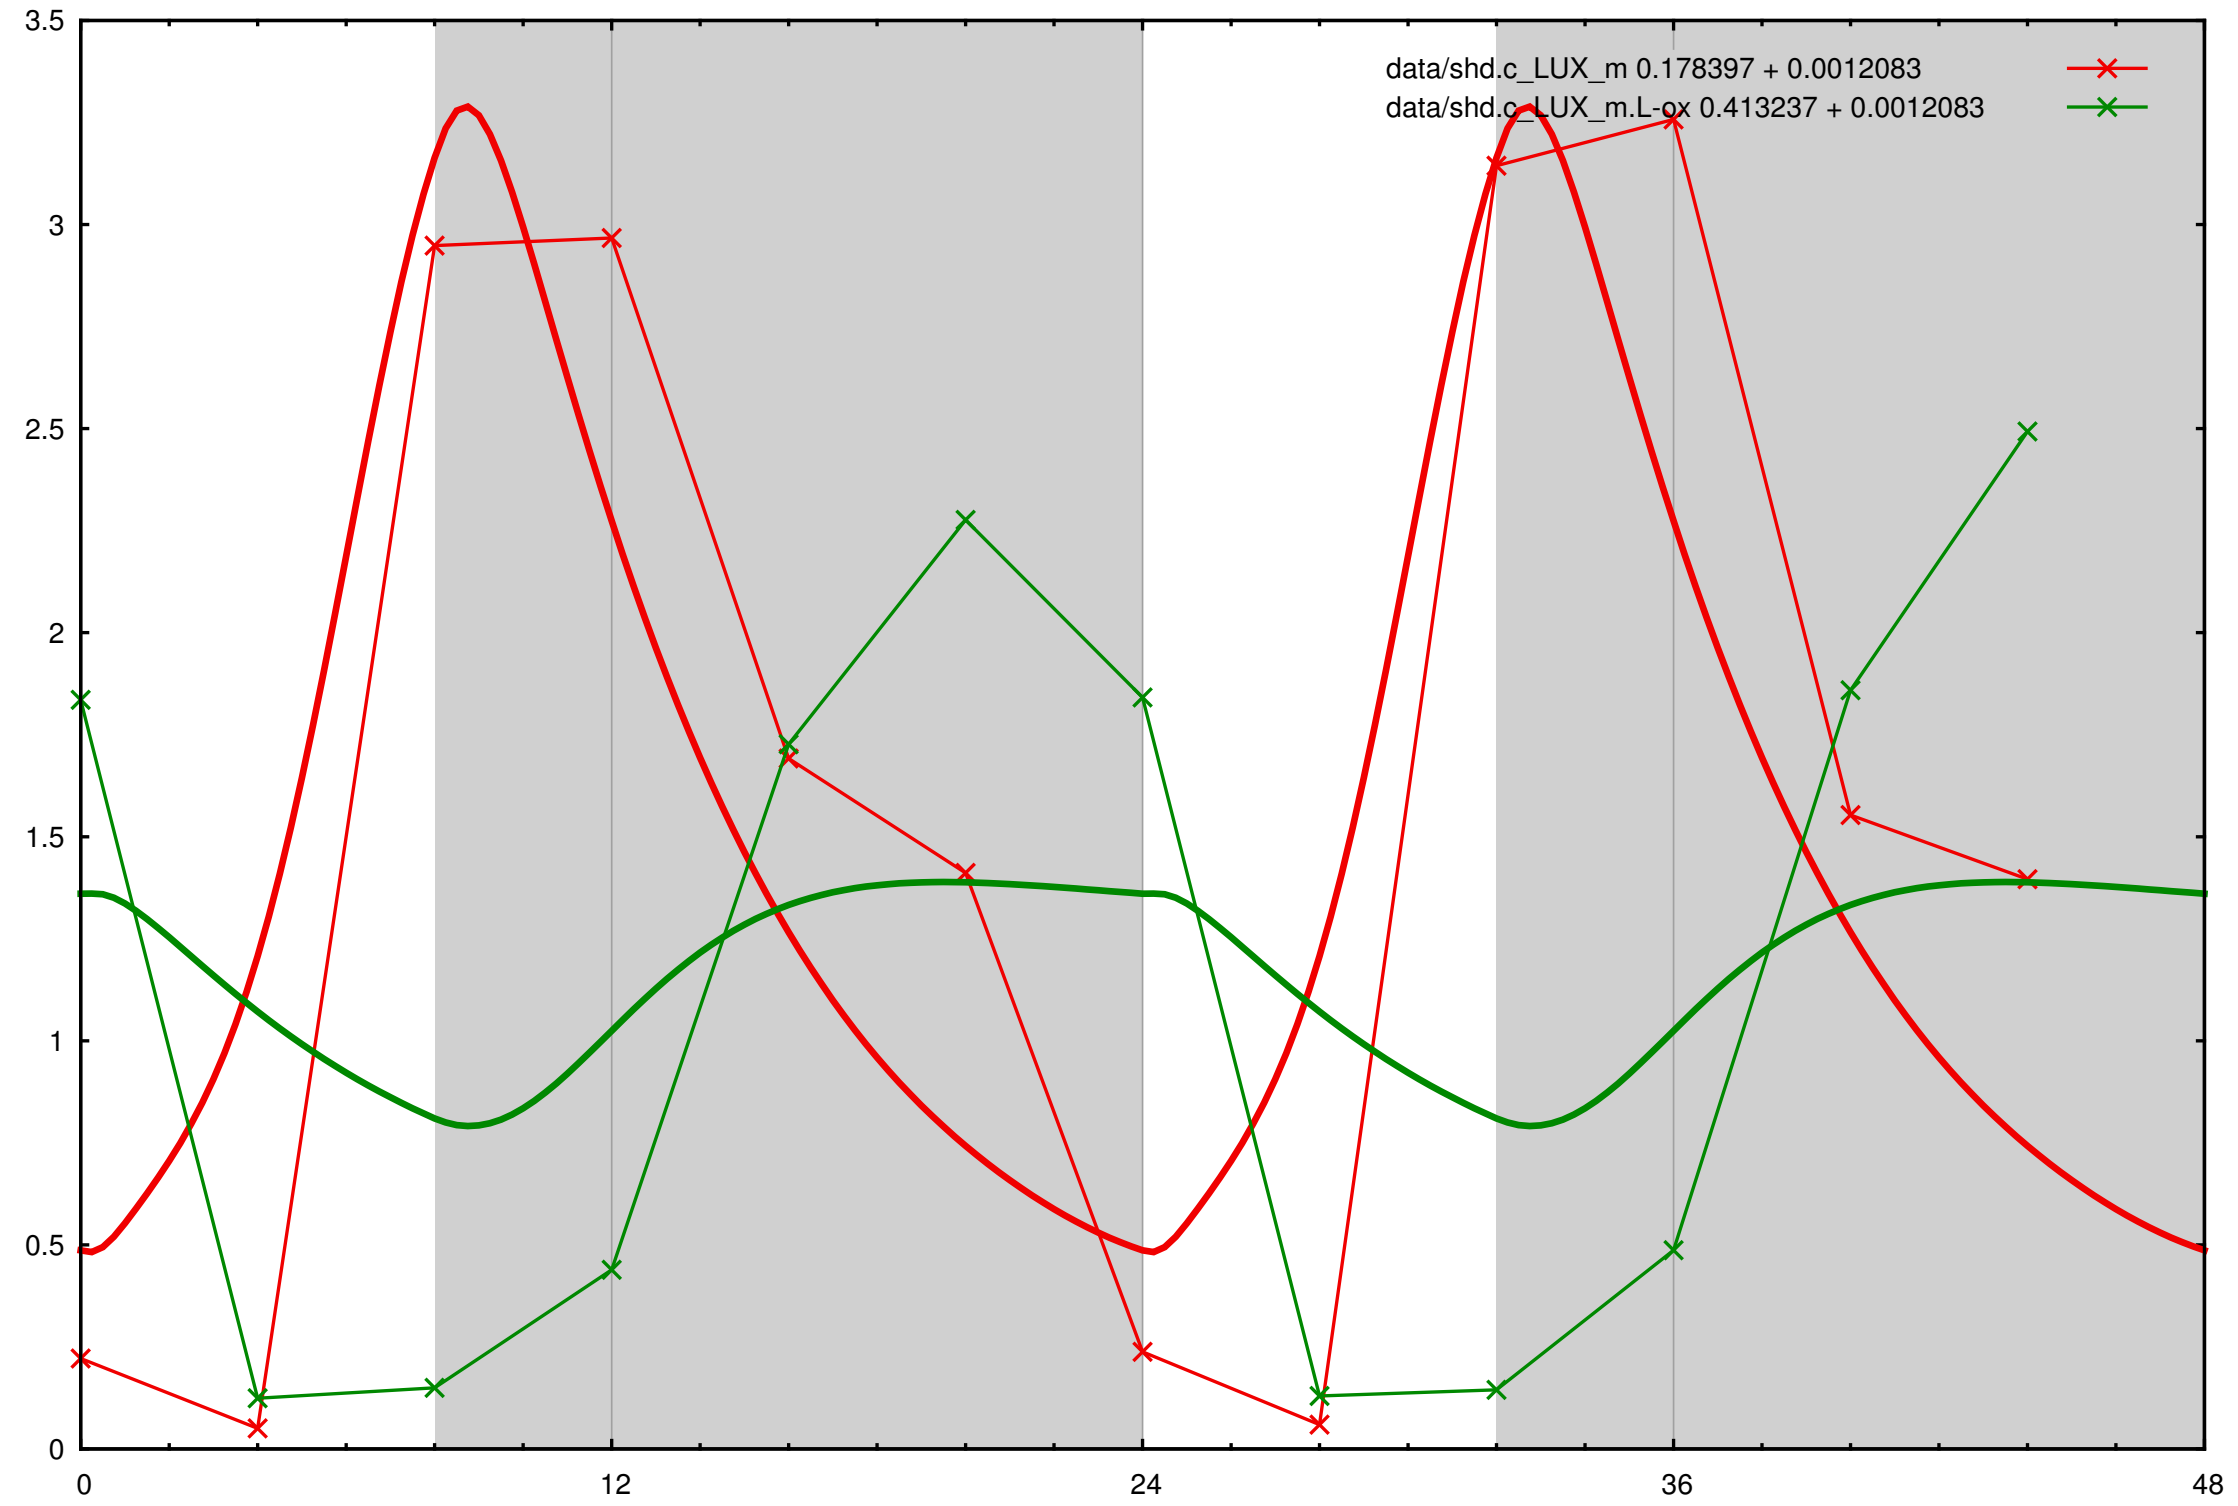

Scale group 37, scost 0.231664

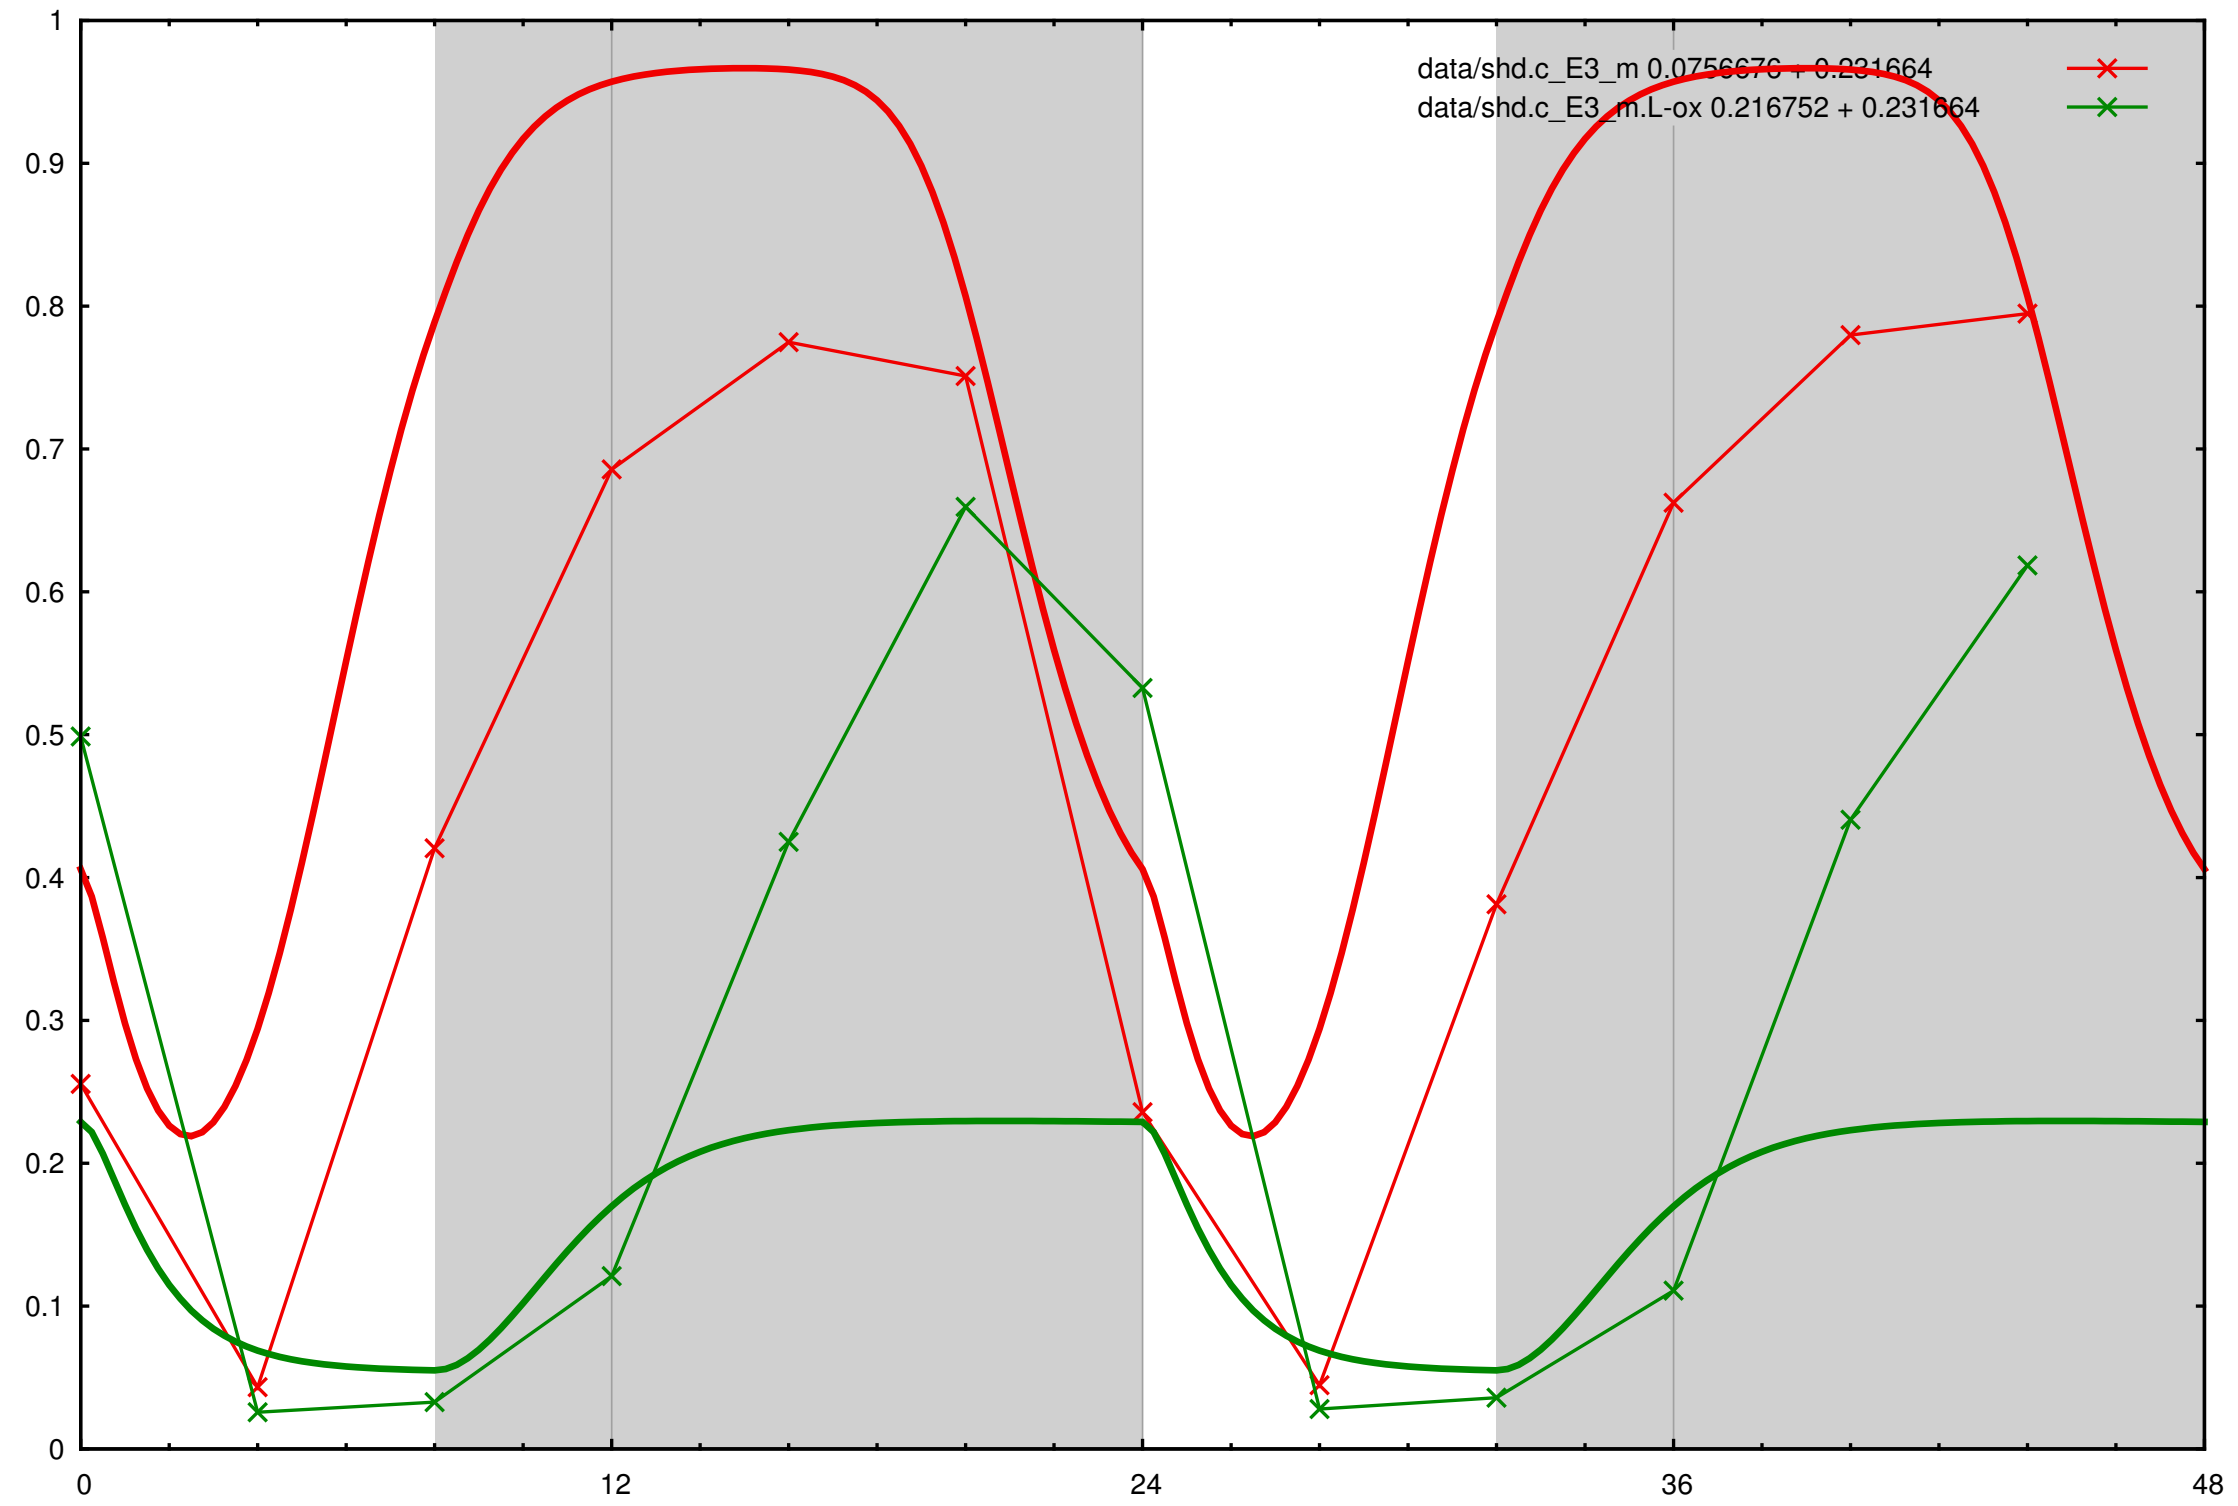

Scale group 38, scost 0.00175081

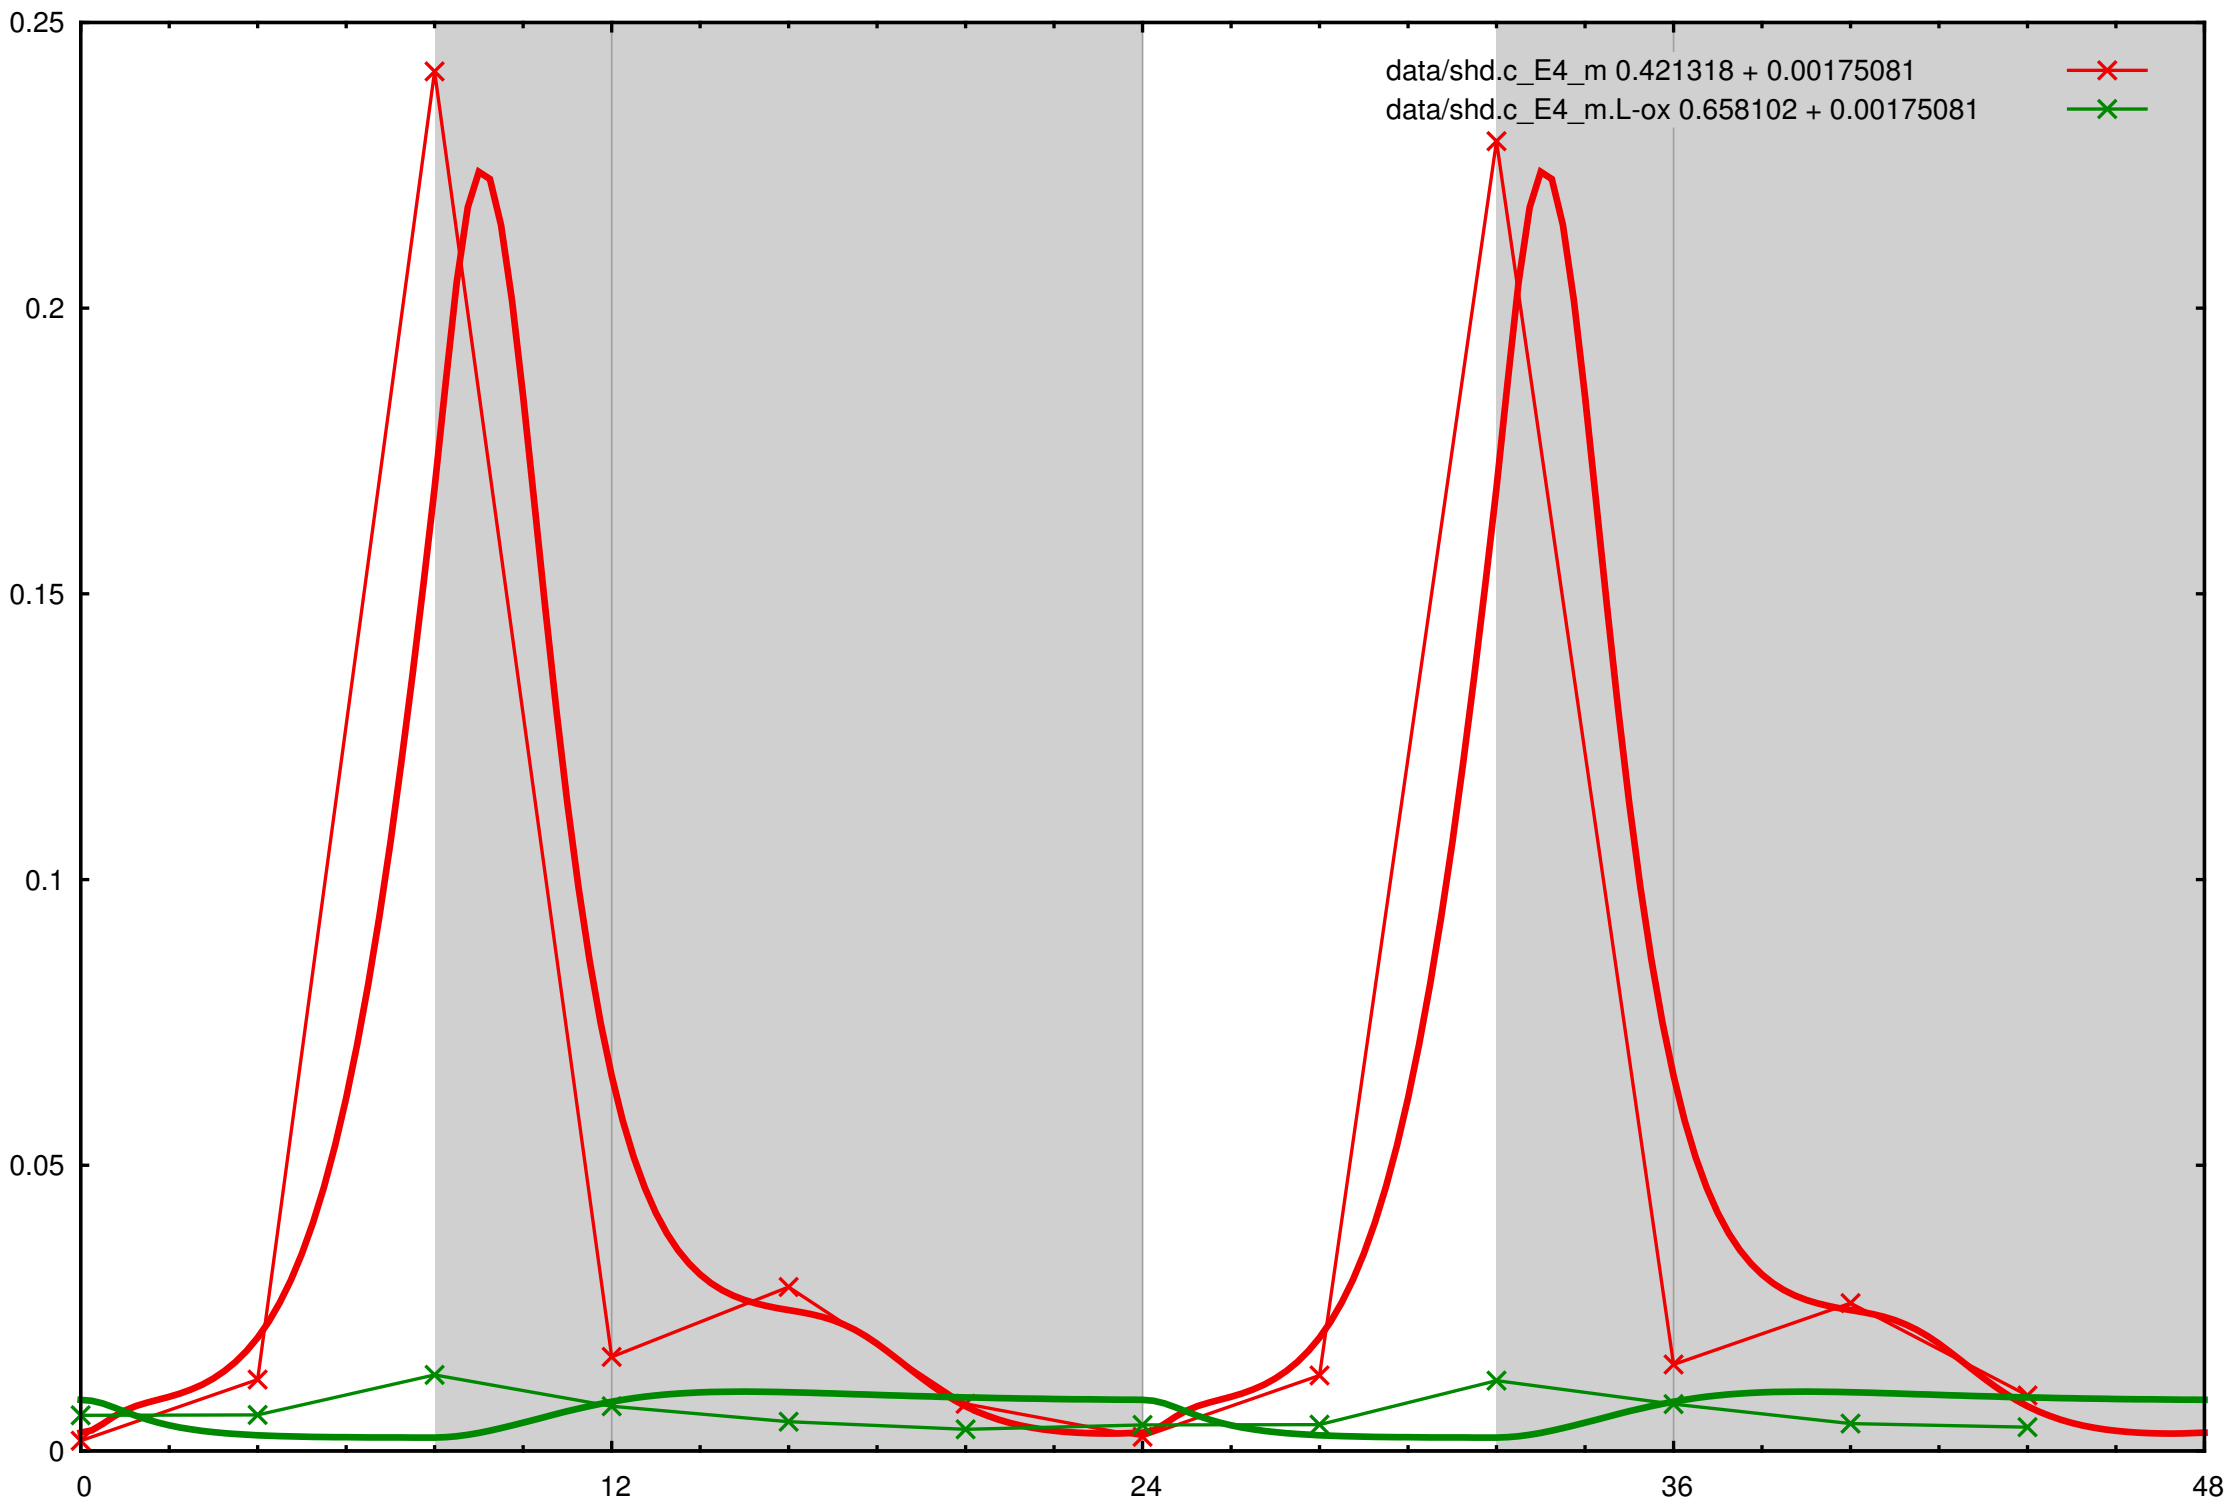

Scale group 39, scost 0.0575951

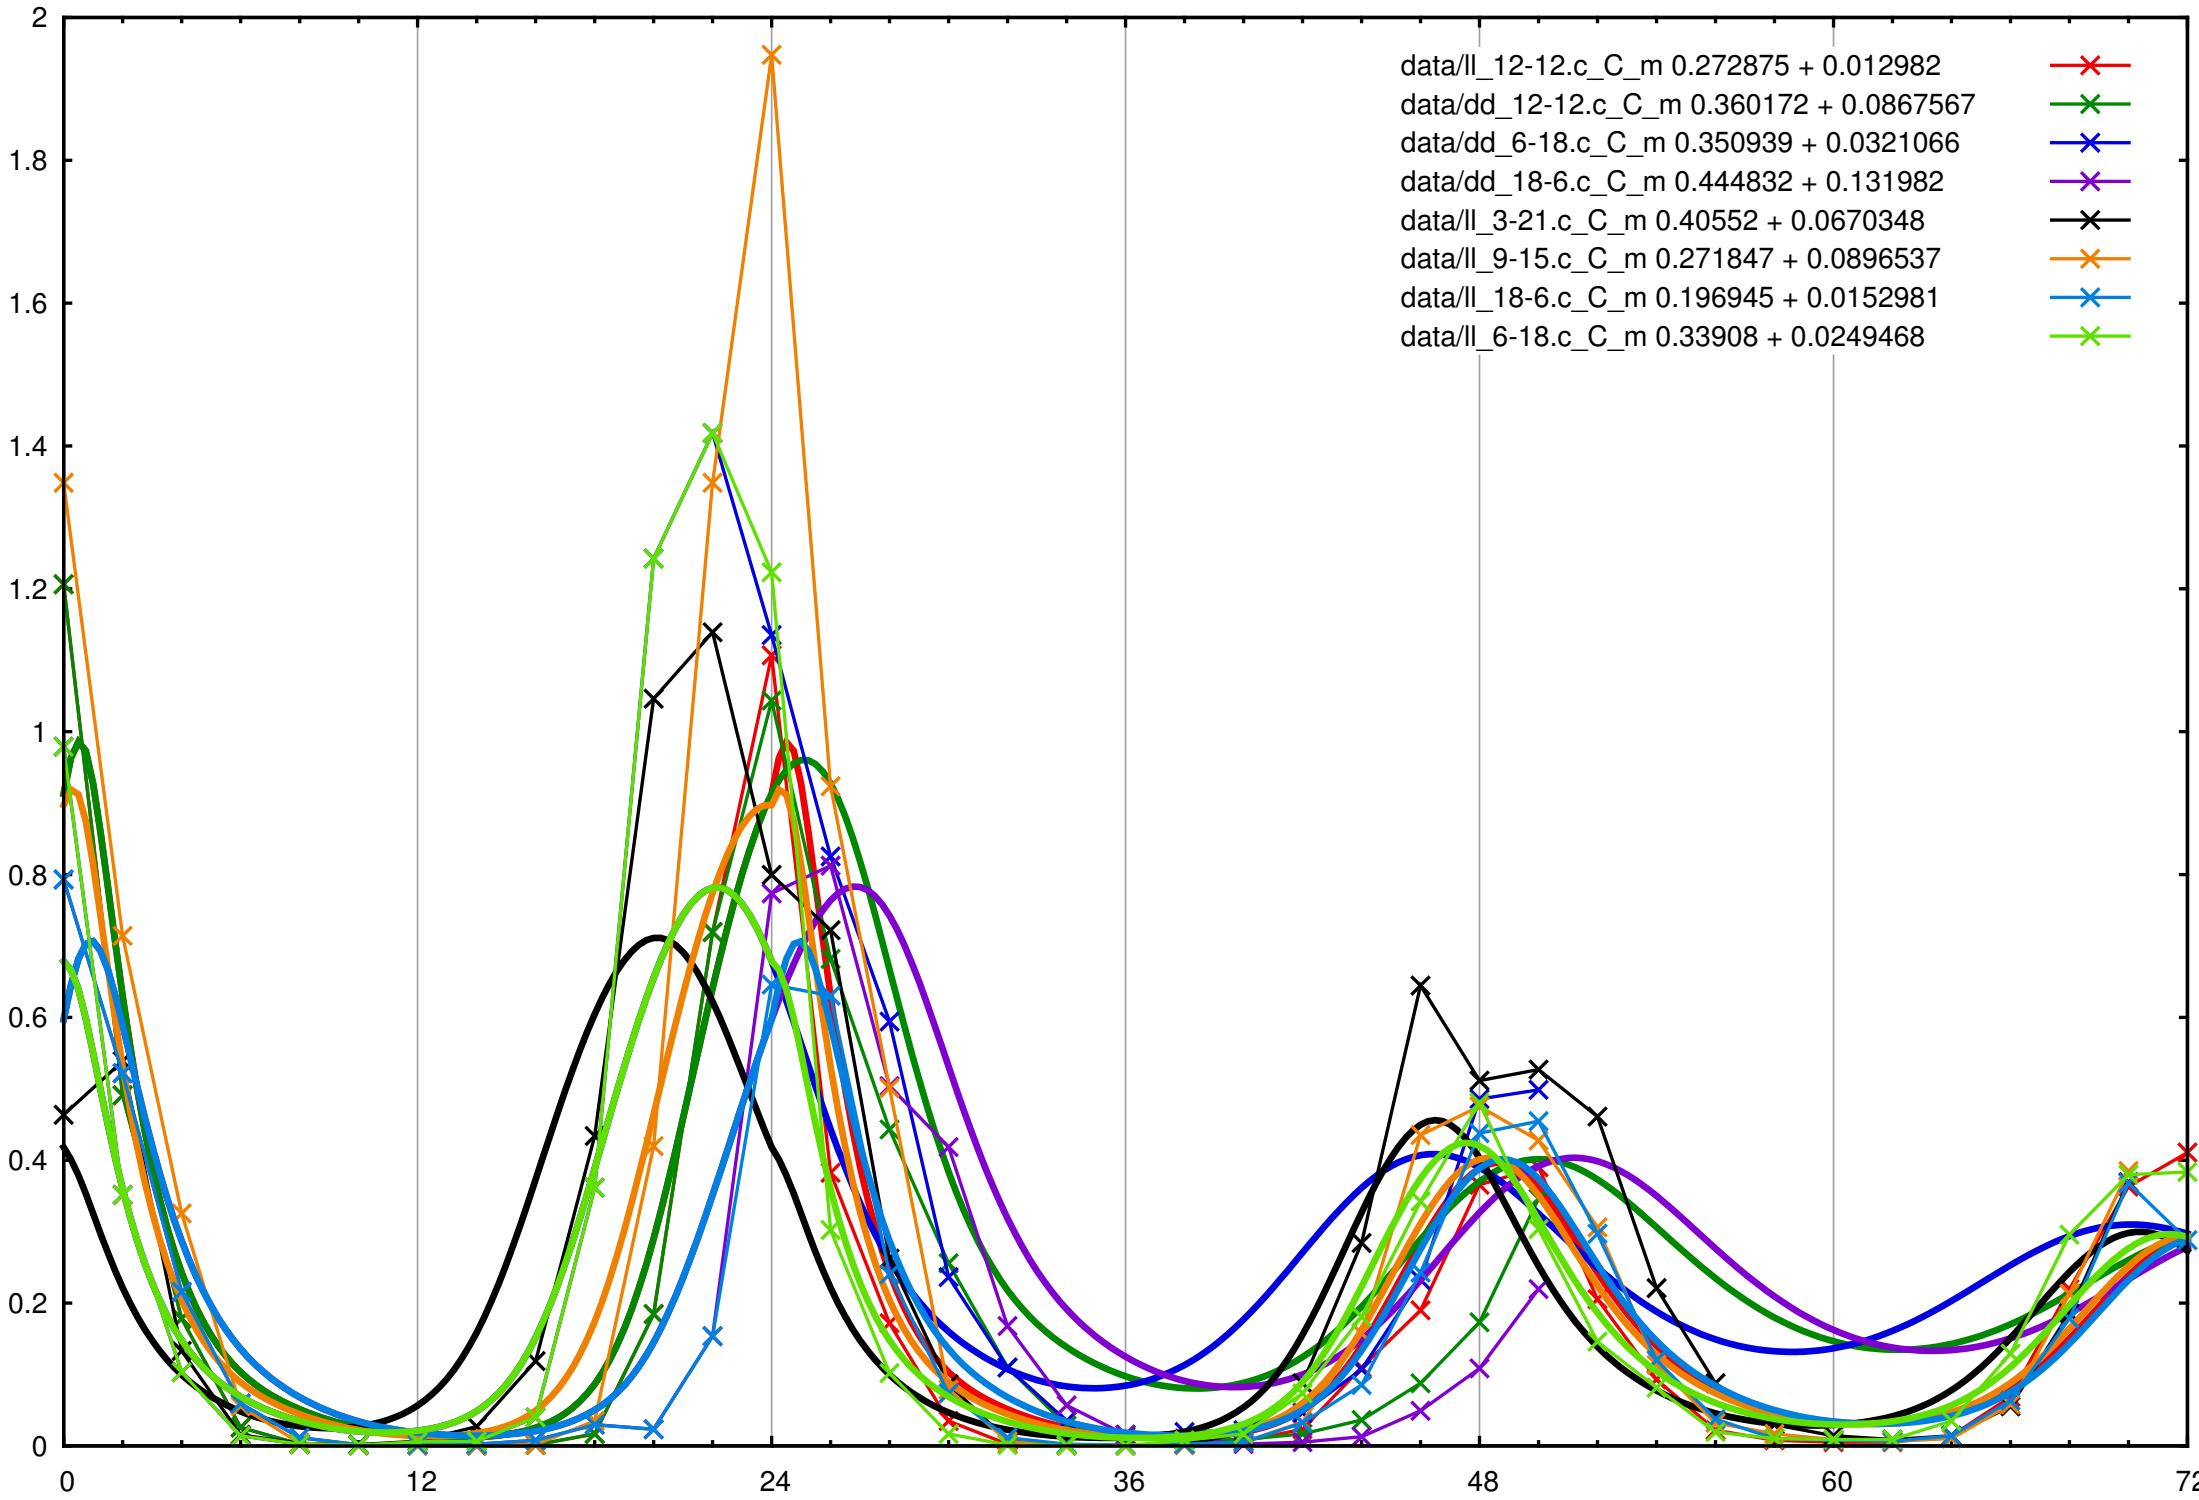

Scale group 40, scost 0.0923173

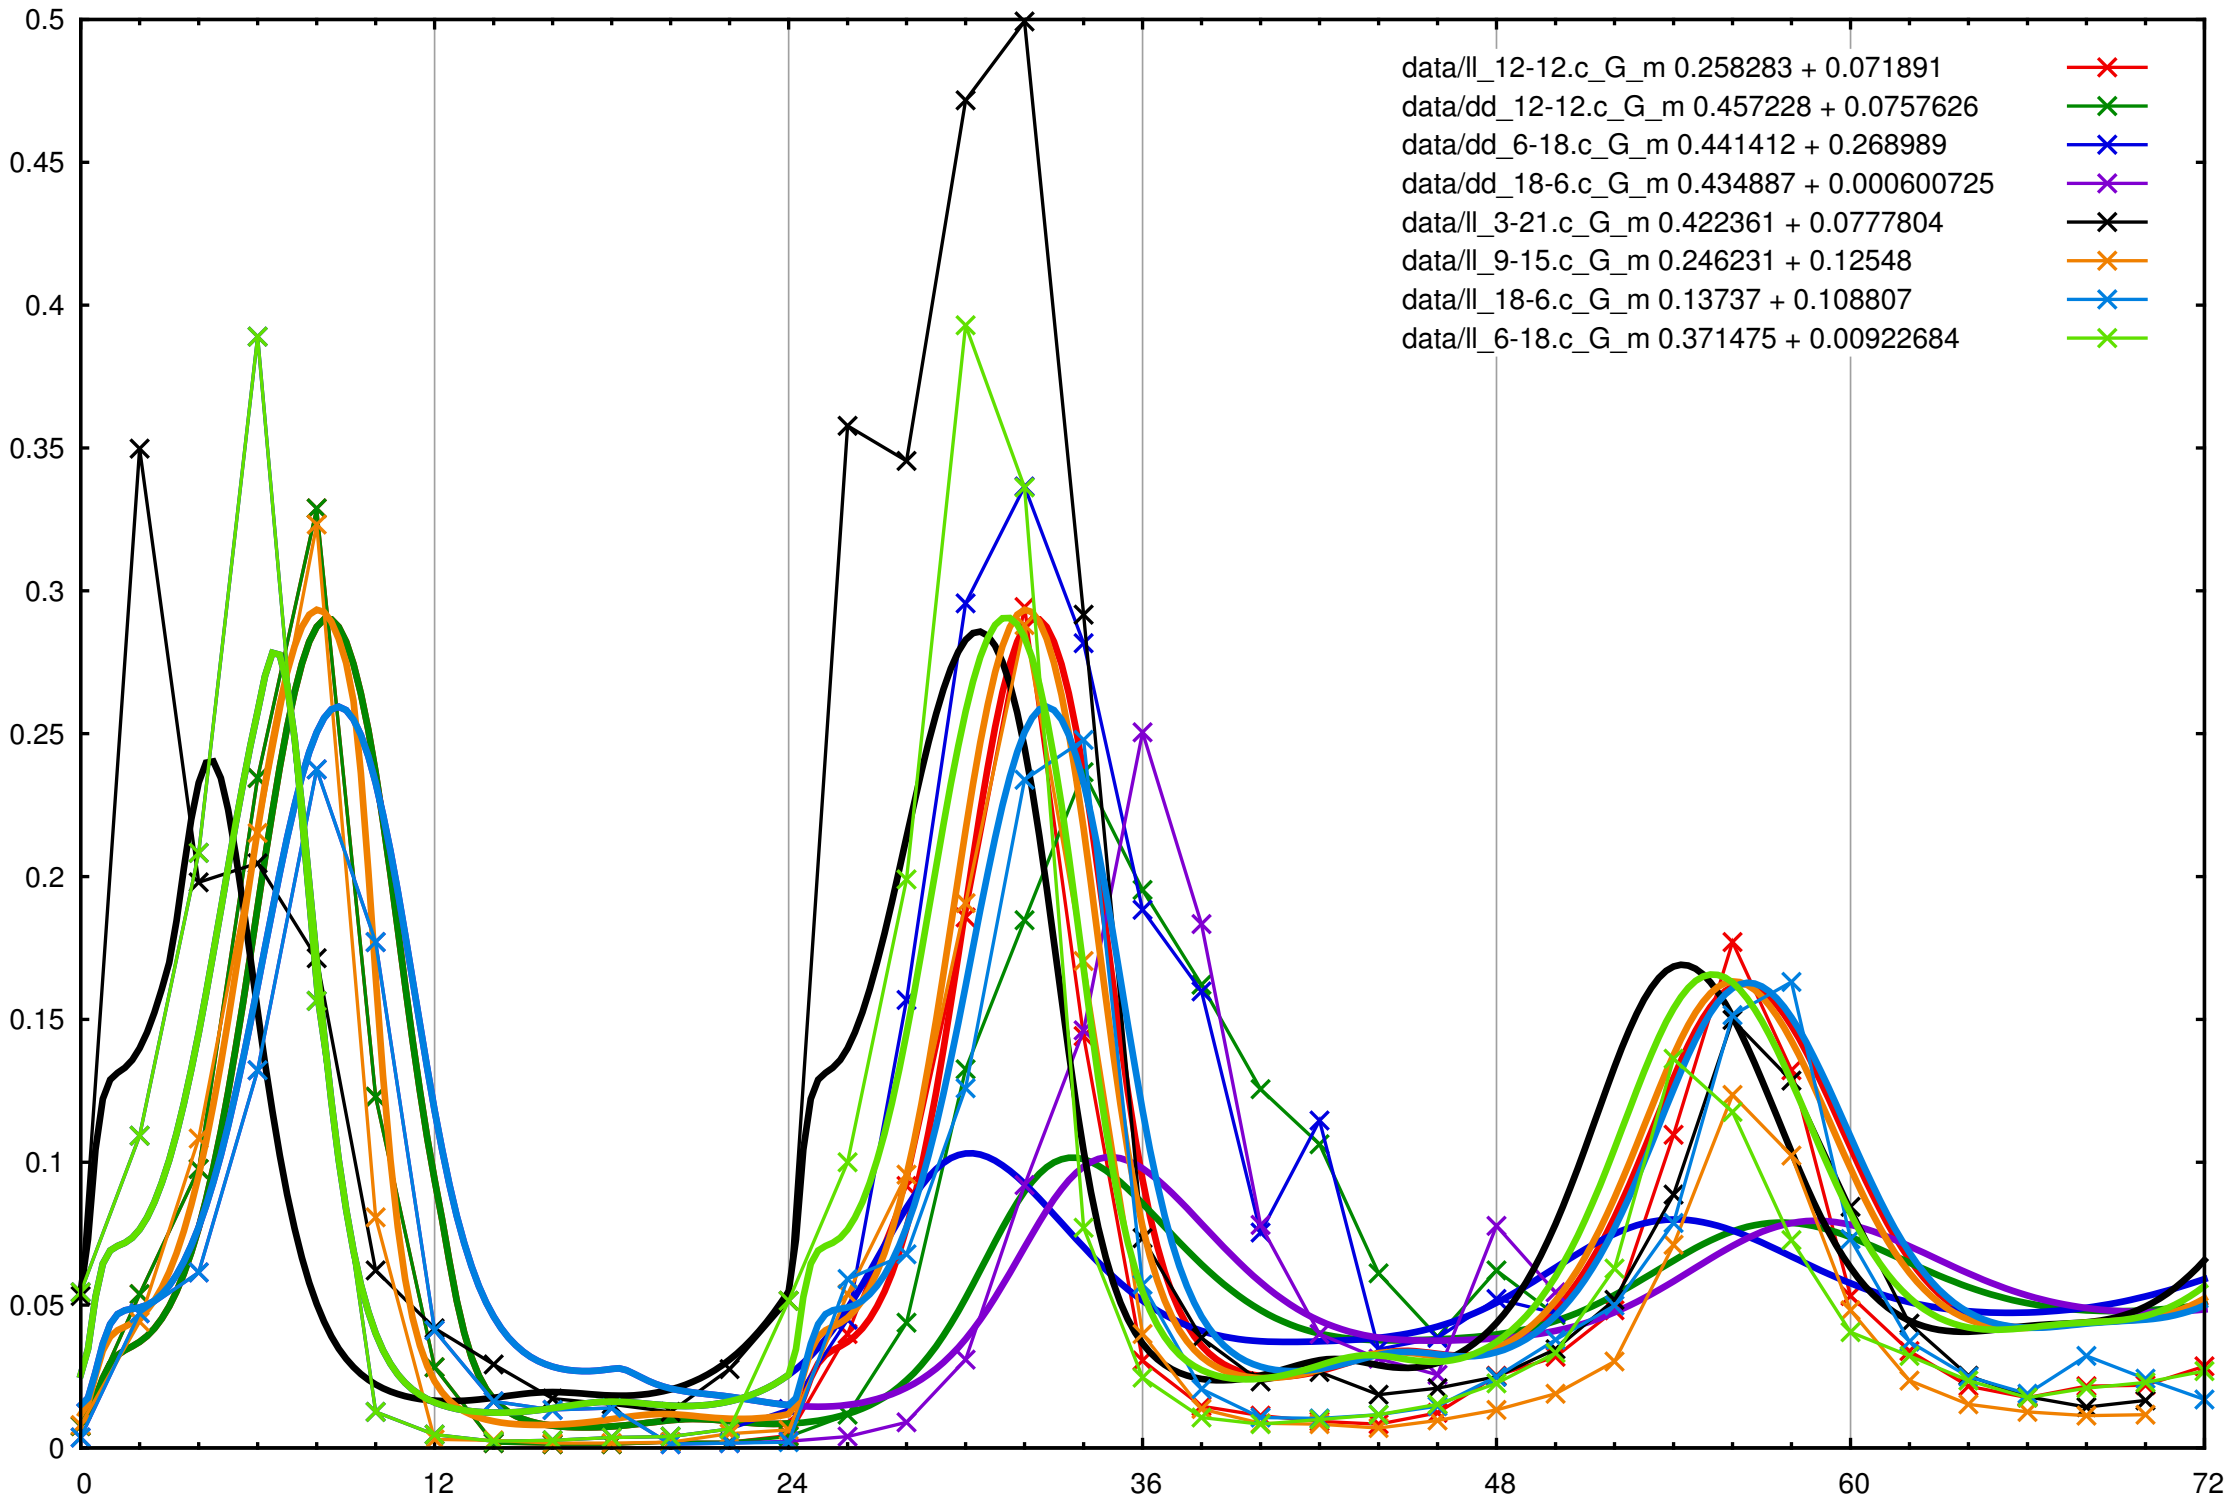



Scale group 41, scost 0.134105

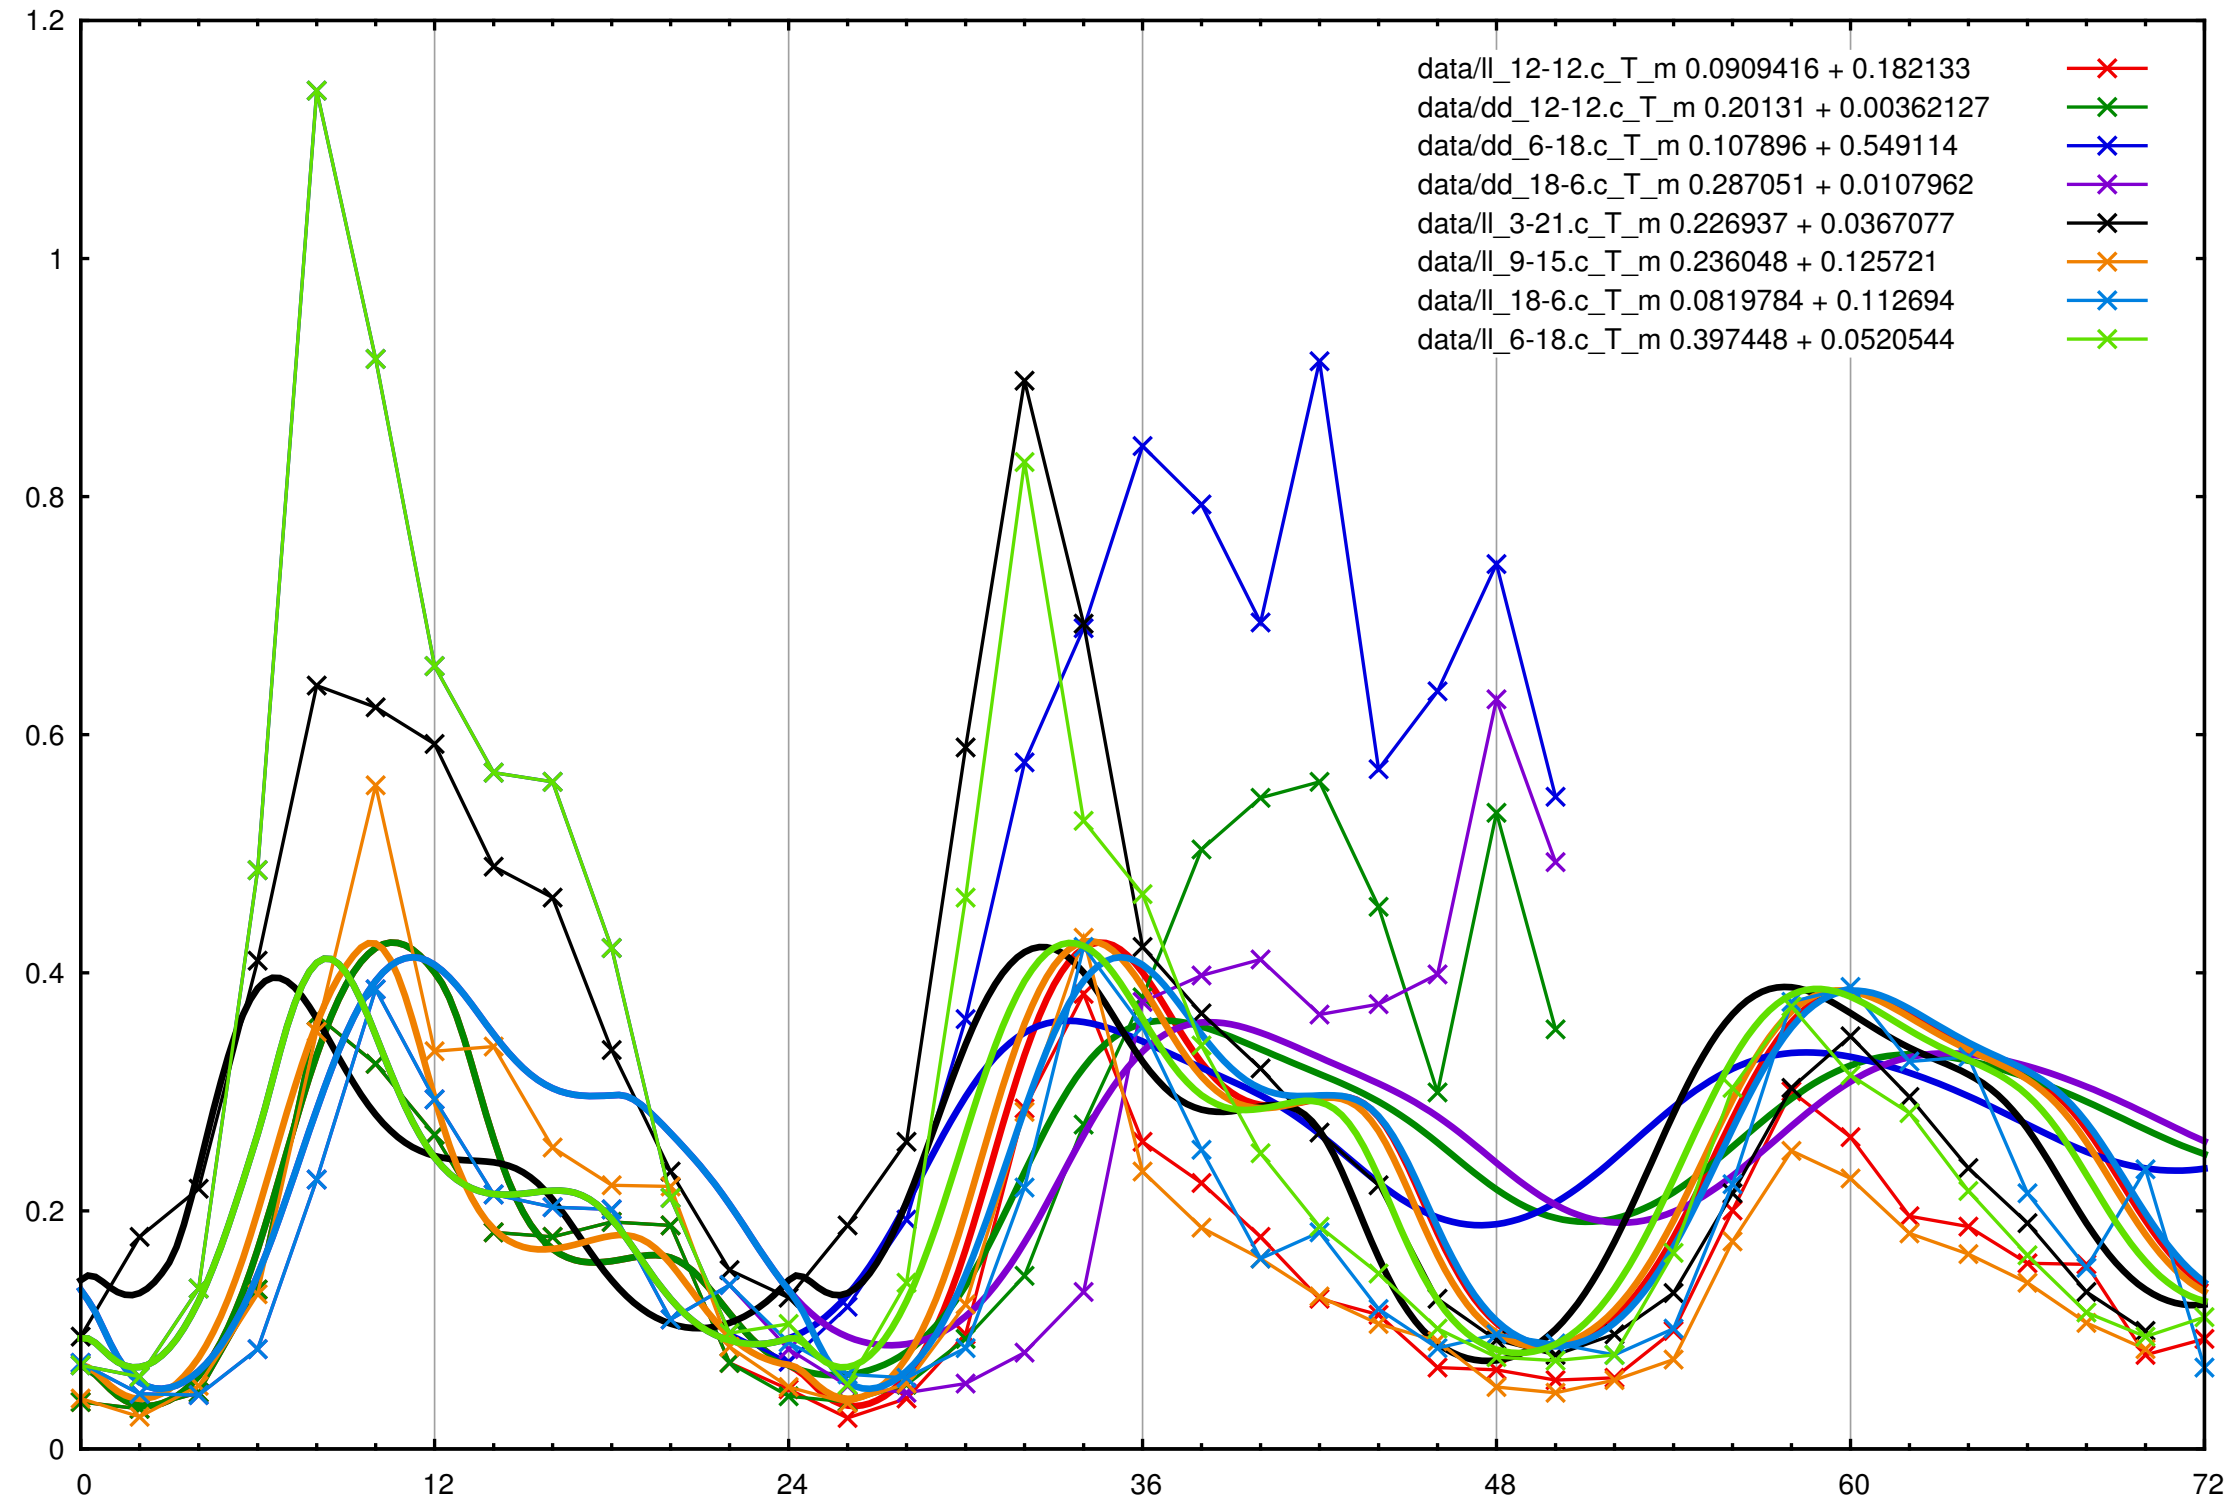

Scale group 42, scost 0.00144635

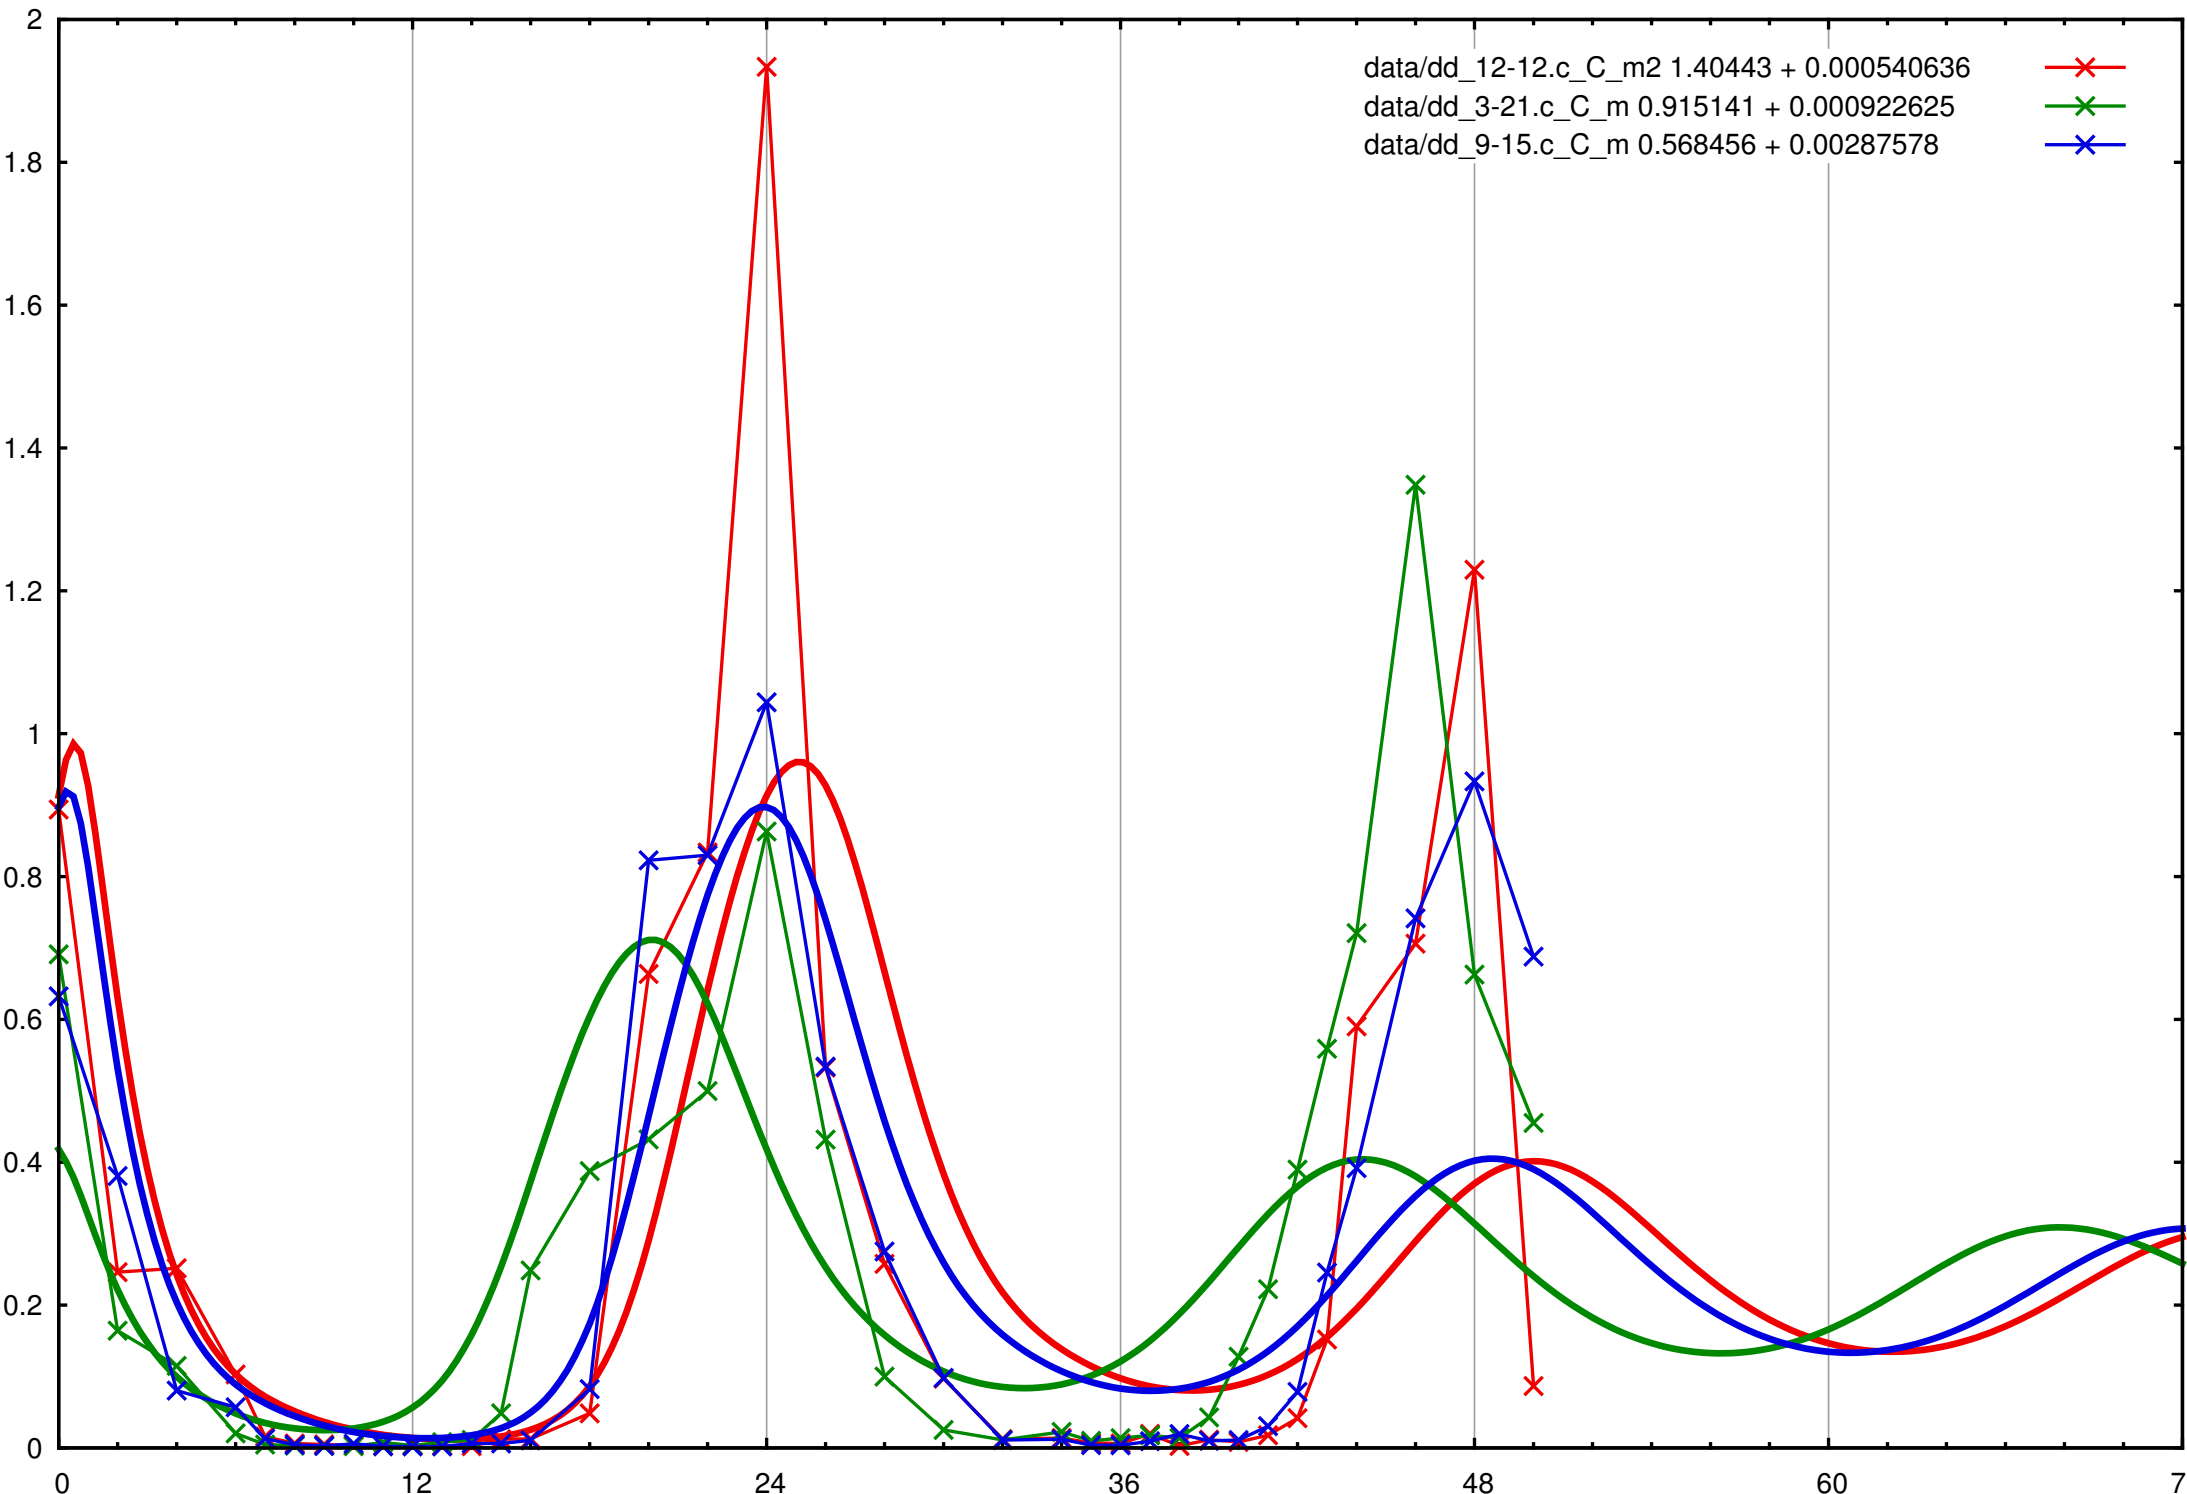

Scale group 43, scost 0.00293722

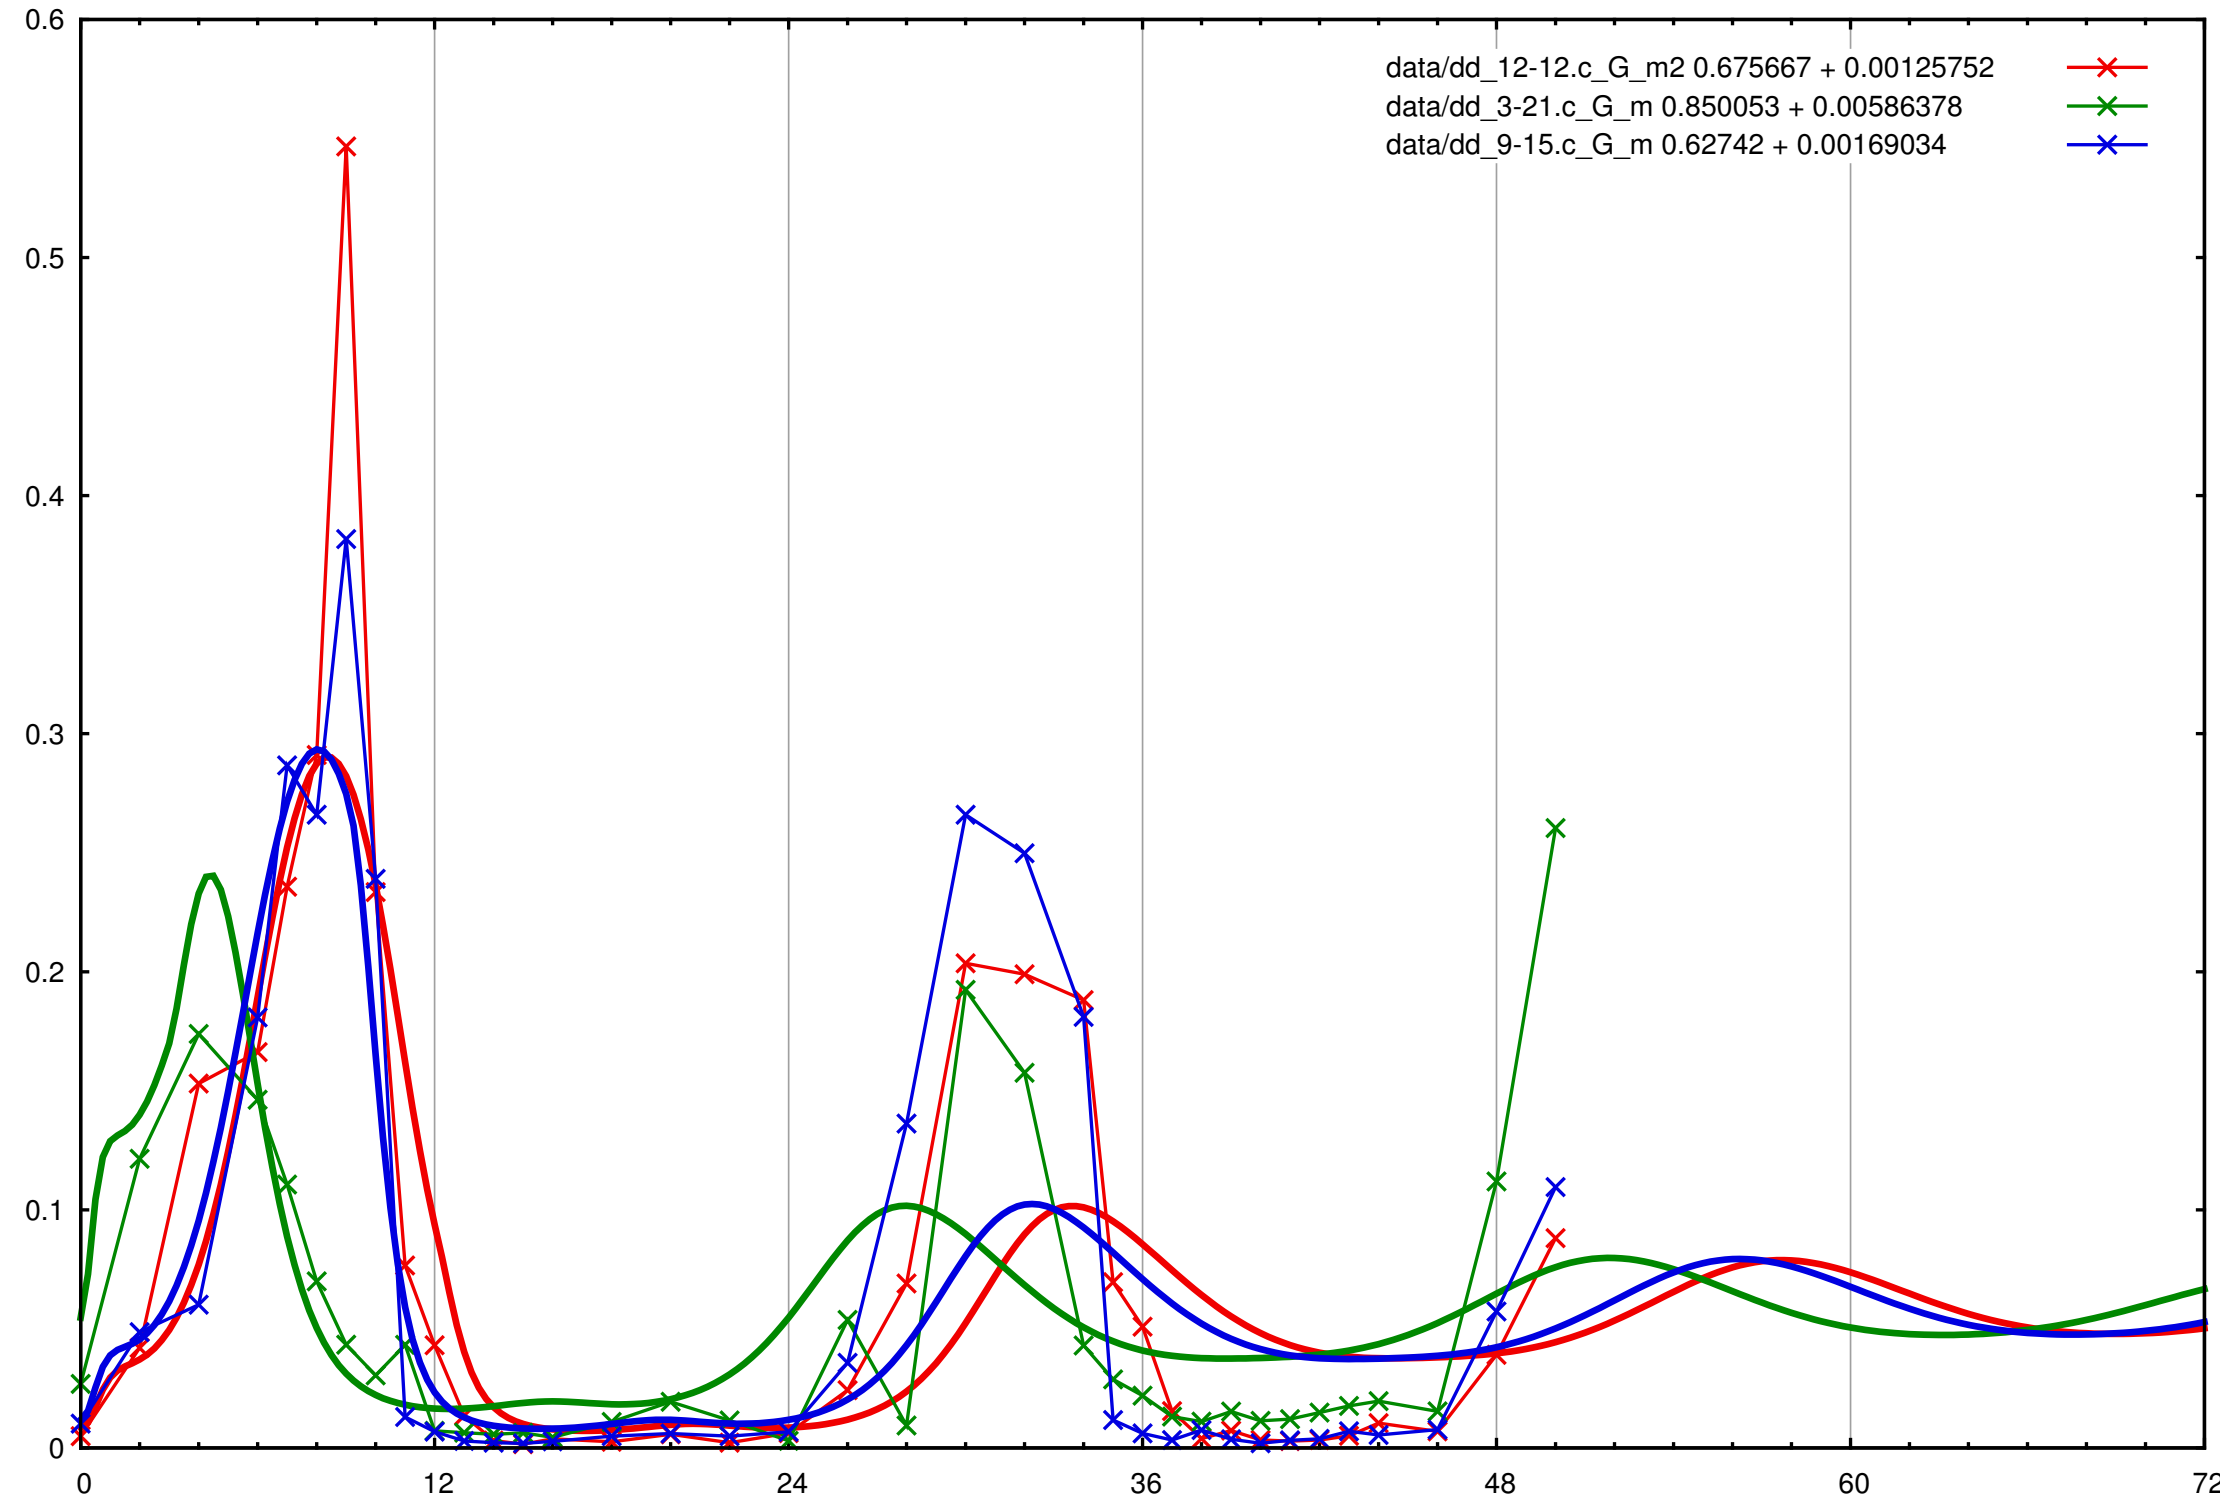

Scale group 44, scost 0.00188267

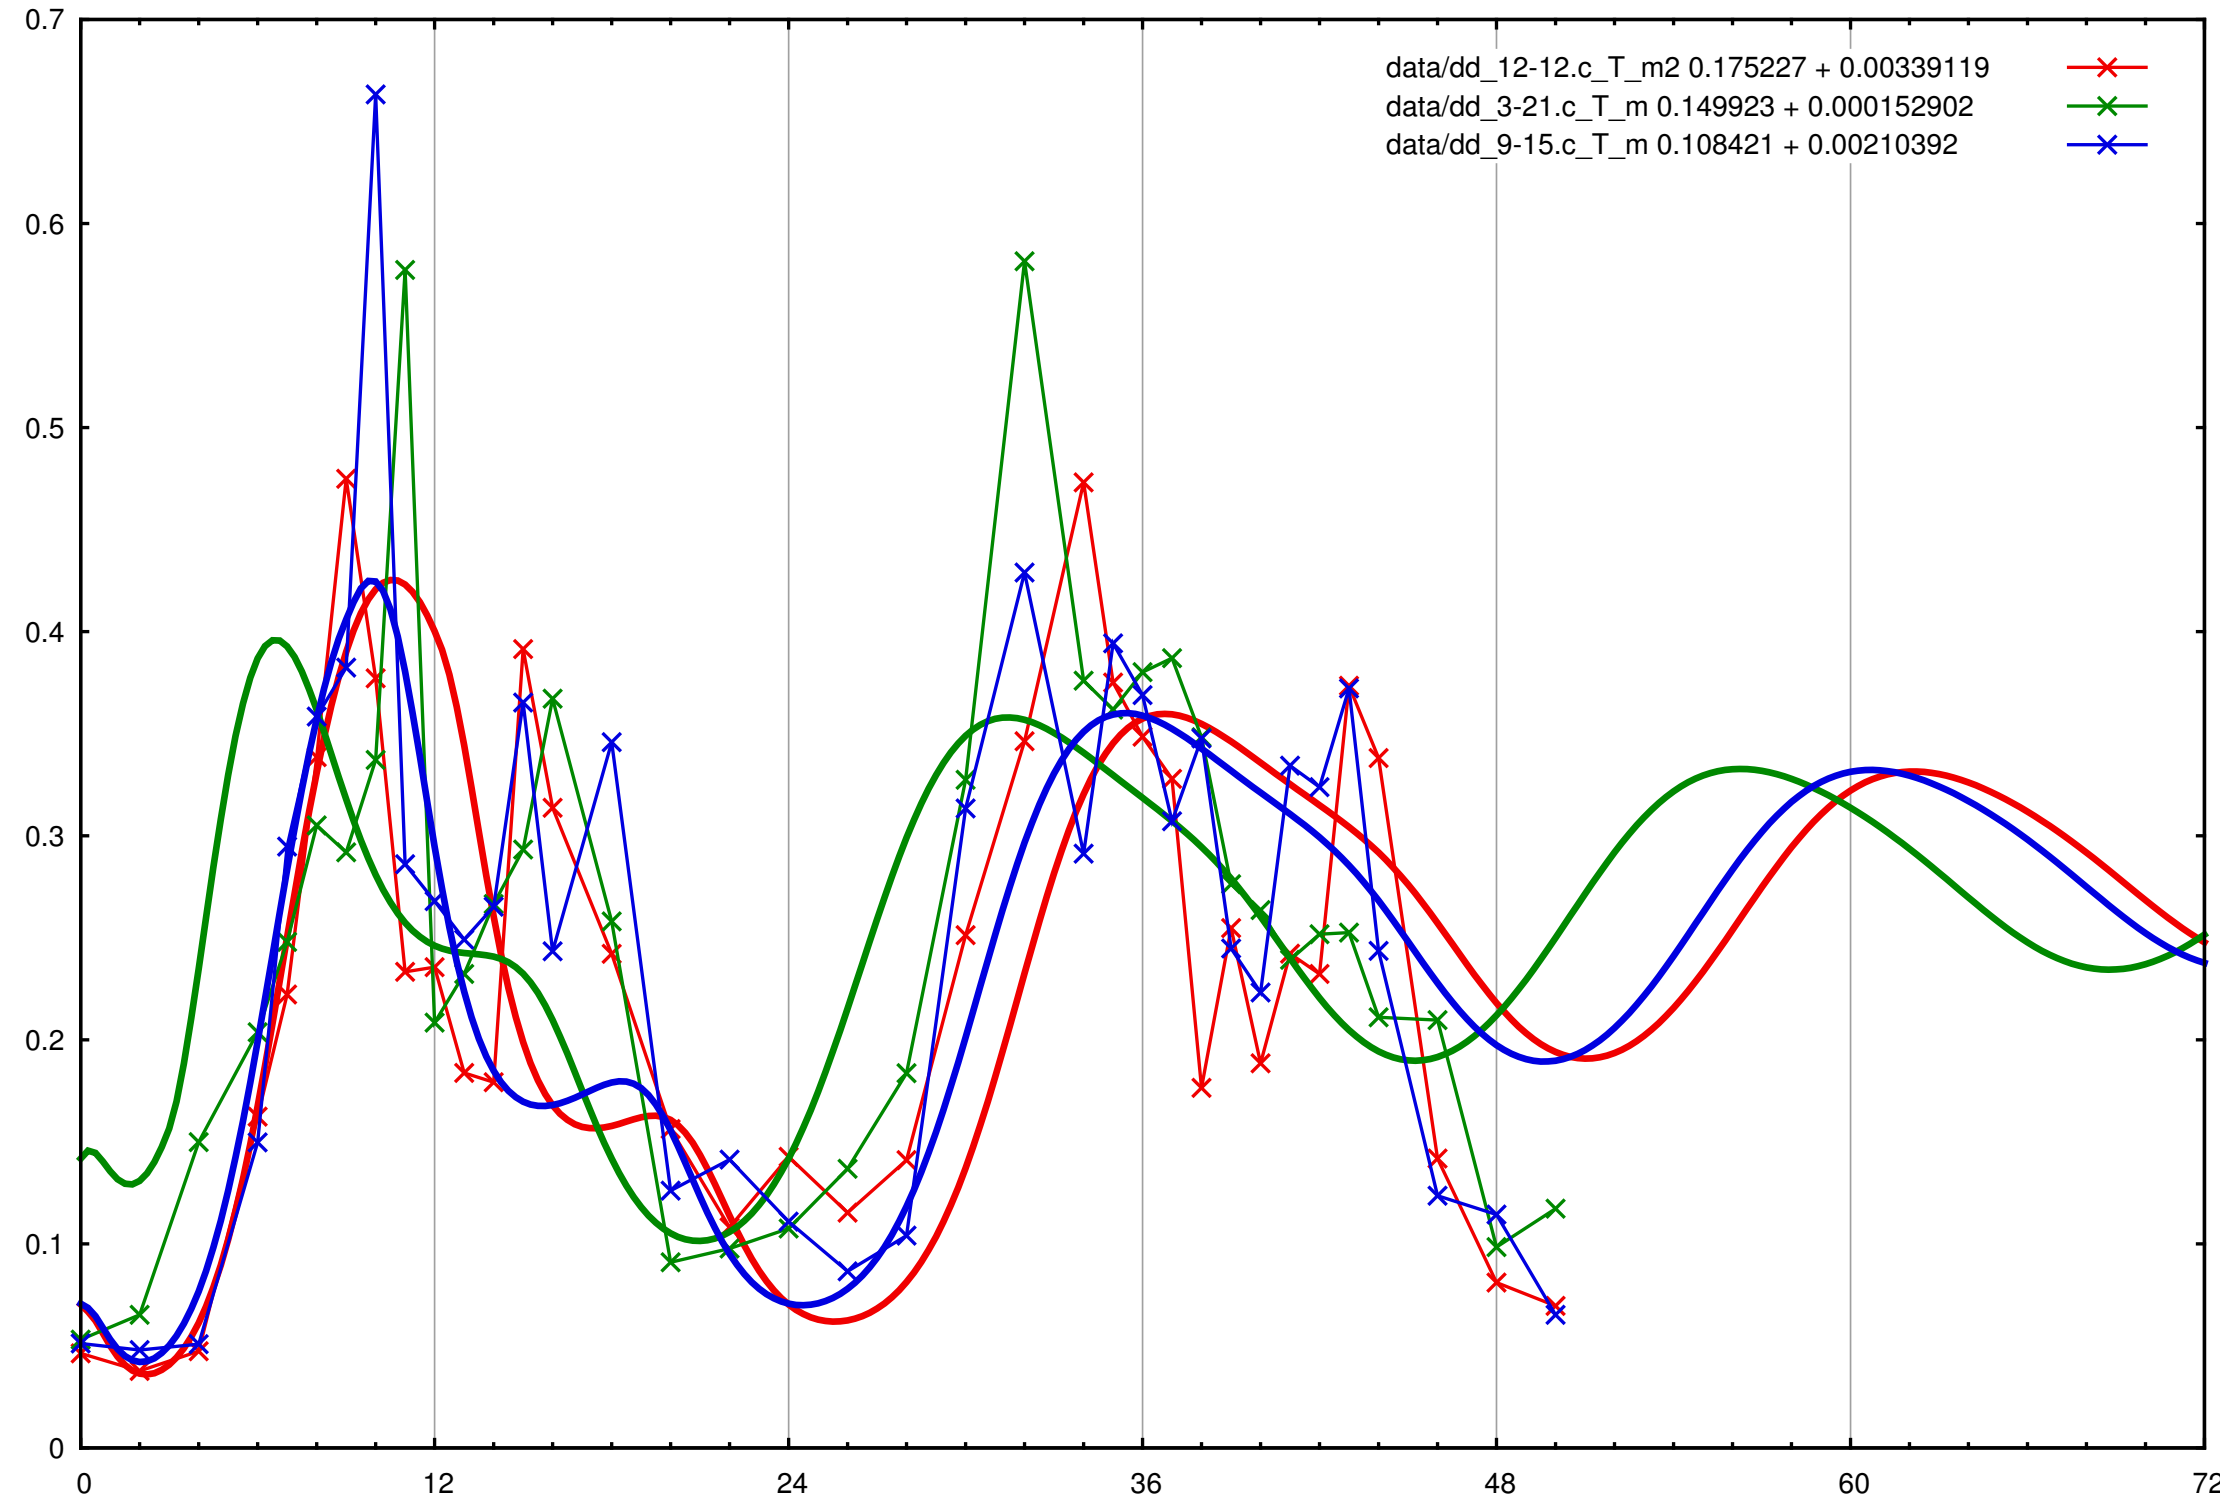

Scale group 45, scost 0.0117774

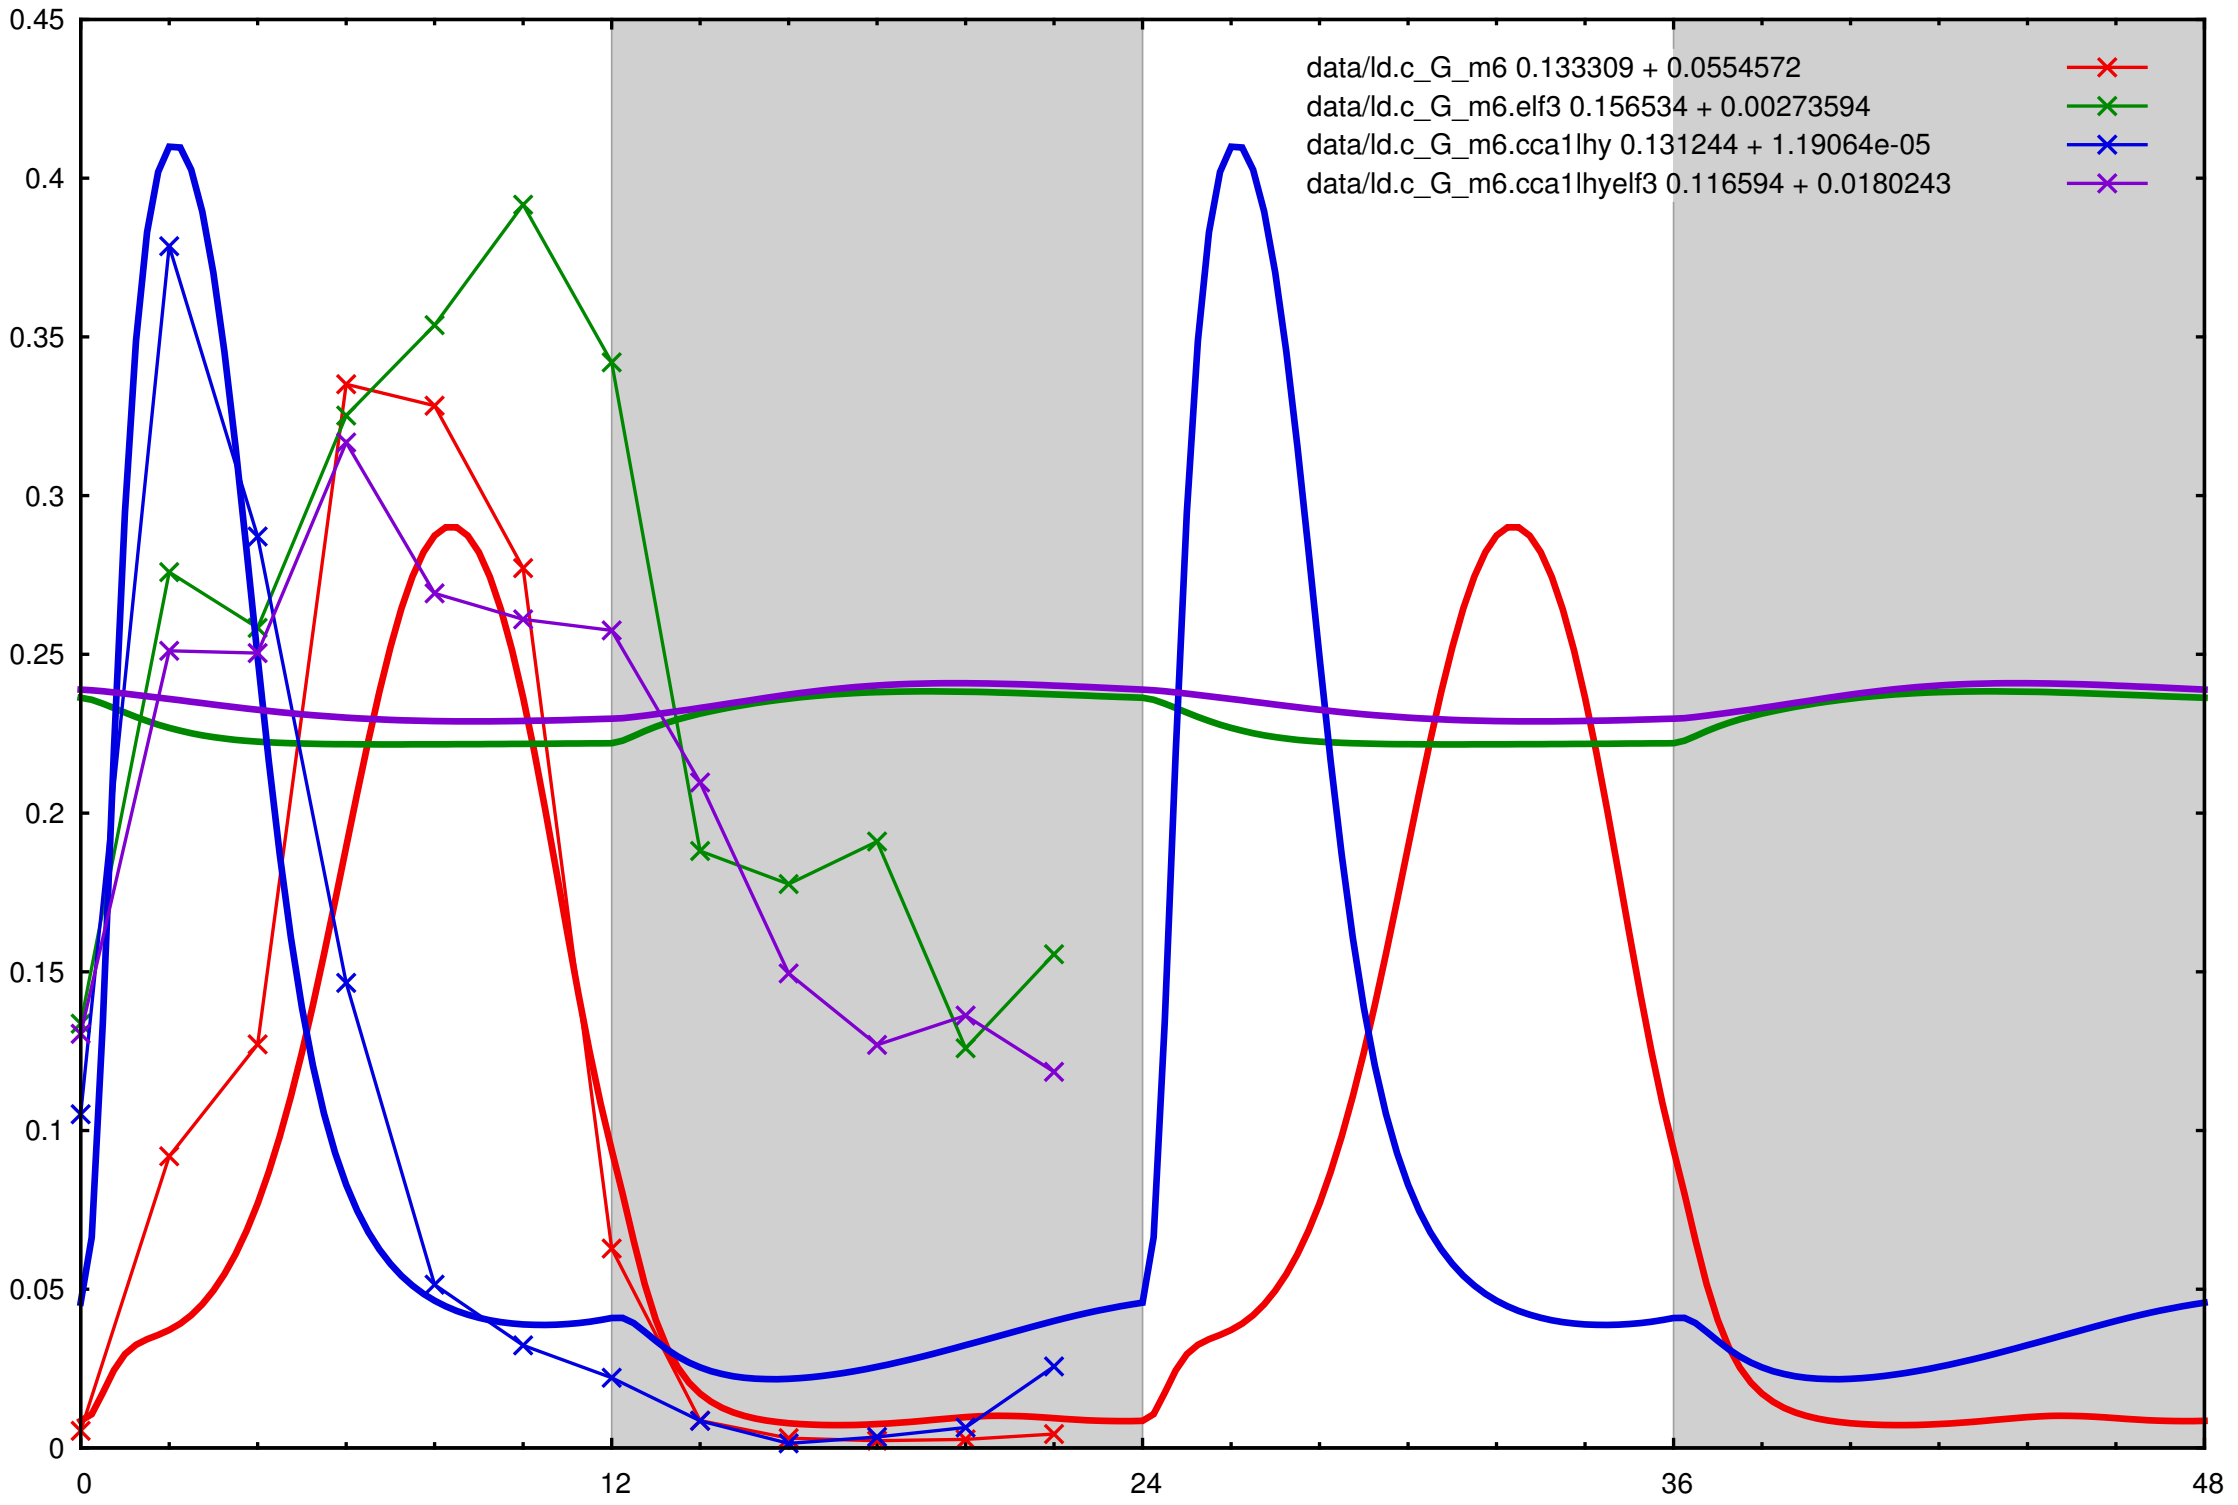

Scale group 46, scost 0.00841764

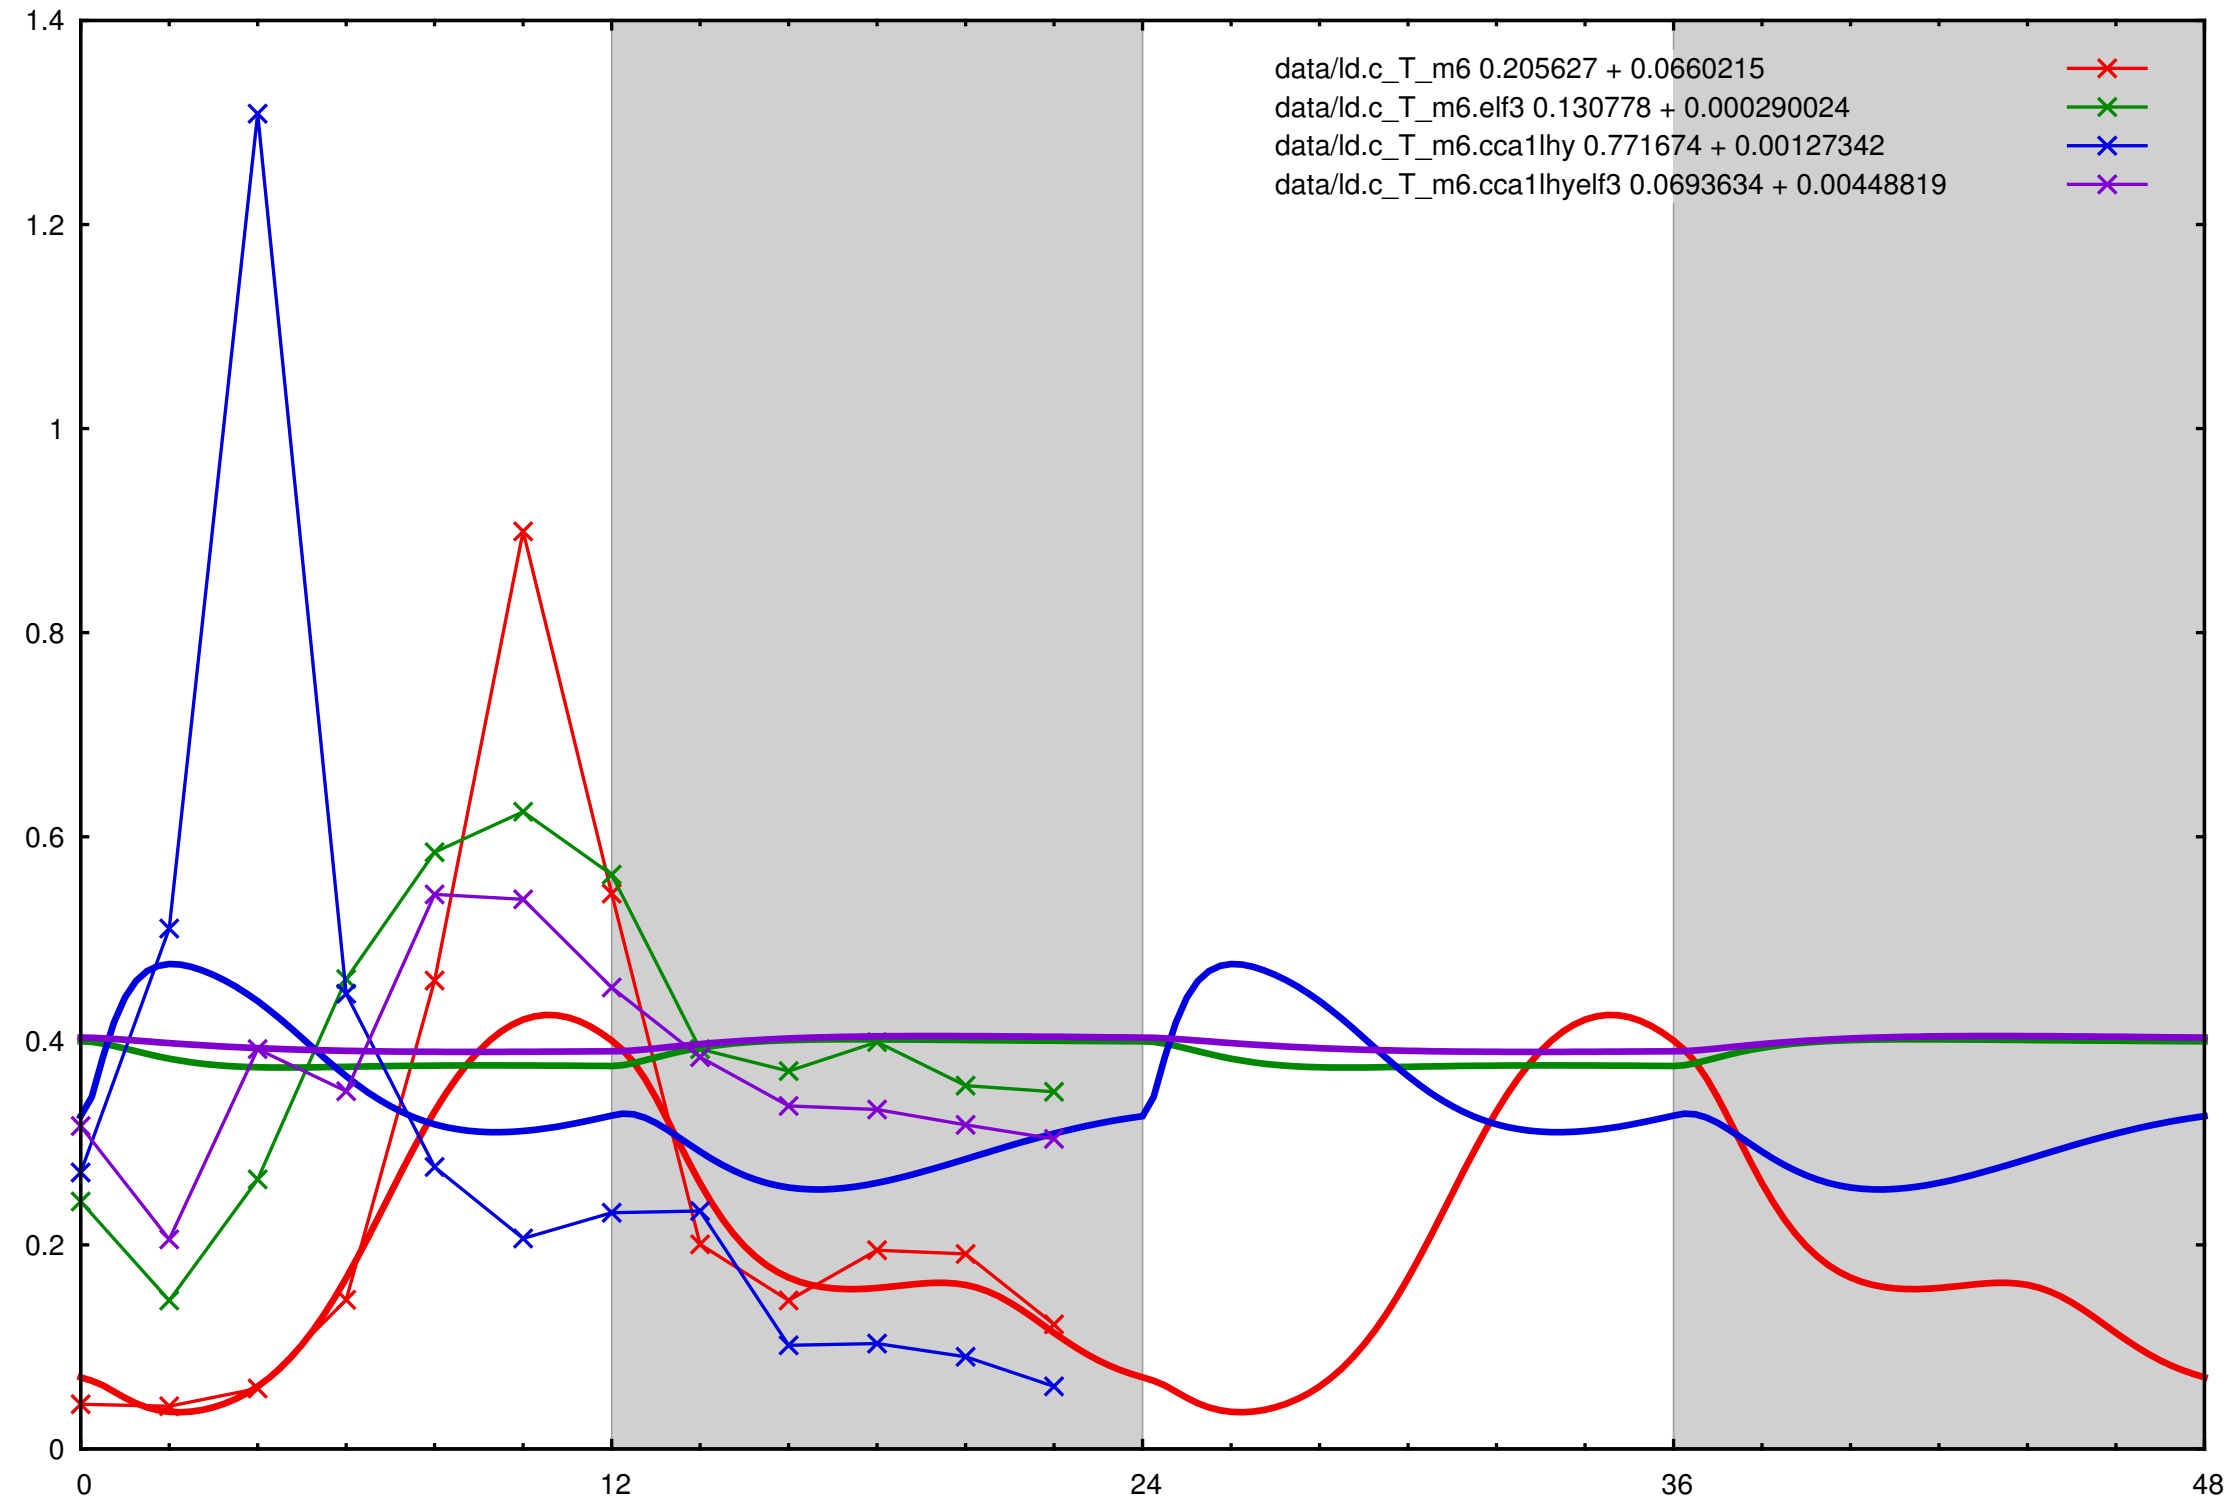

Scale group 47, scost 0.302909

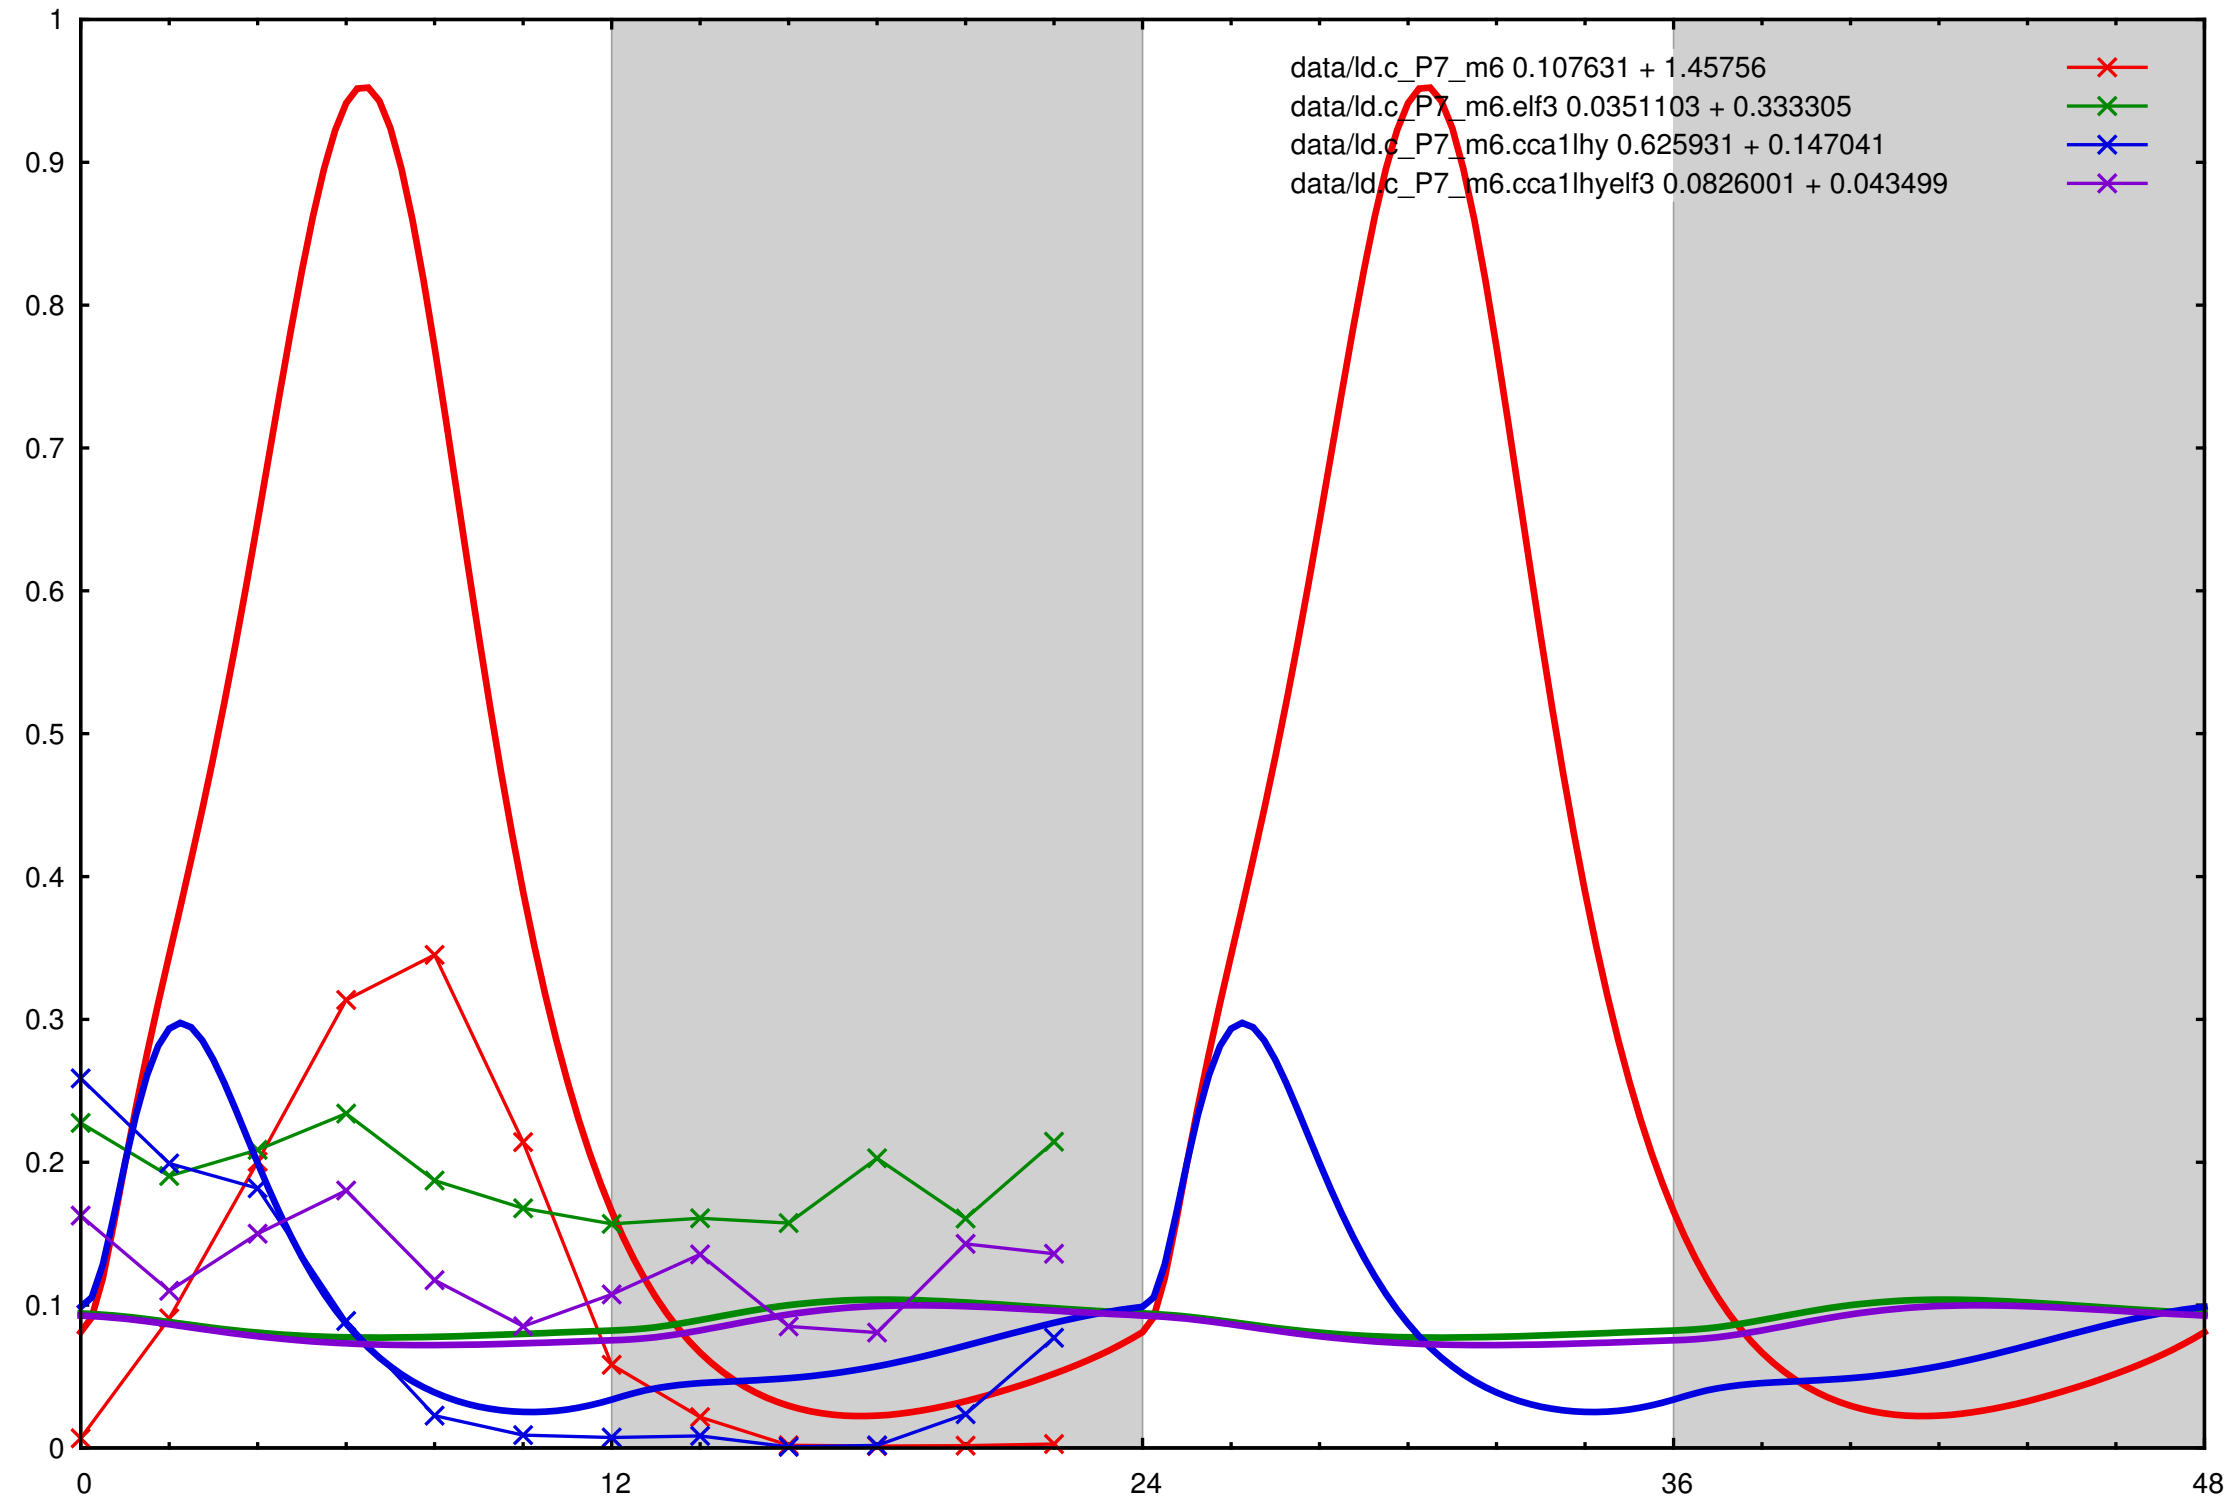

Scale group 48, scost 1.17687

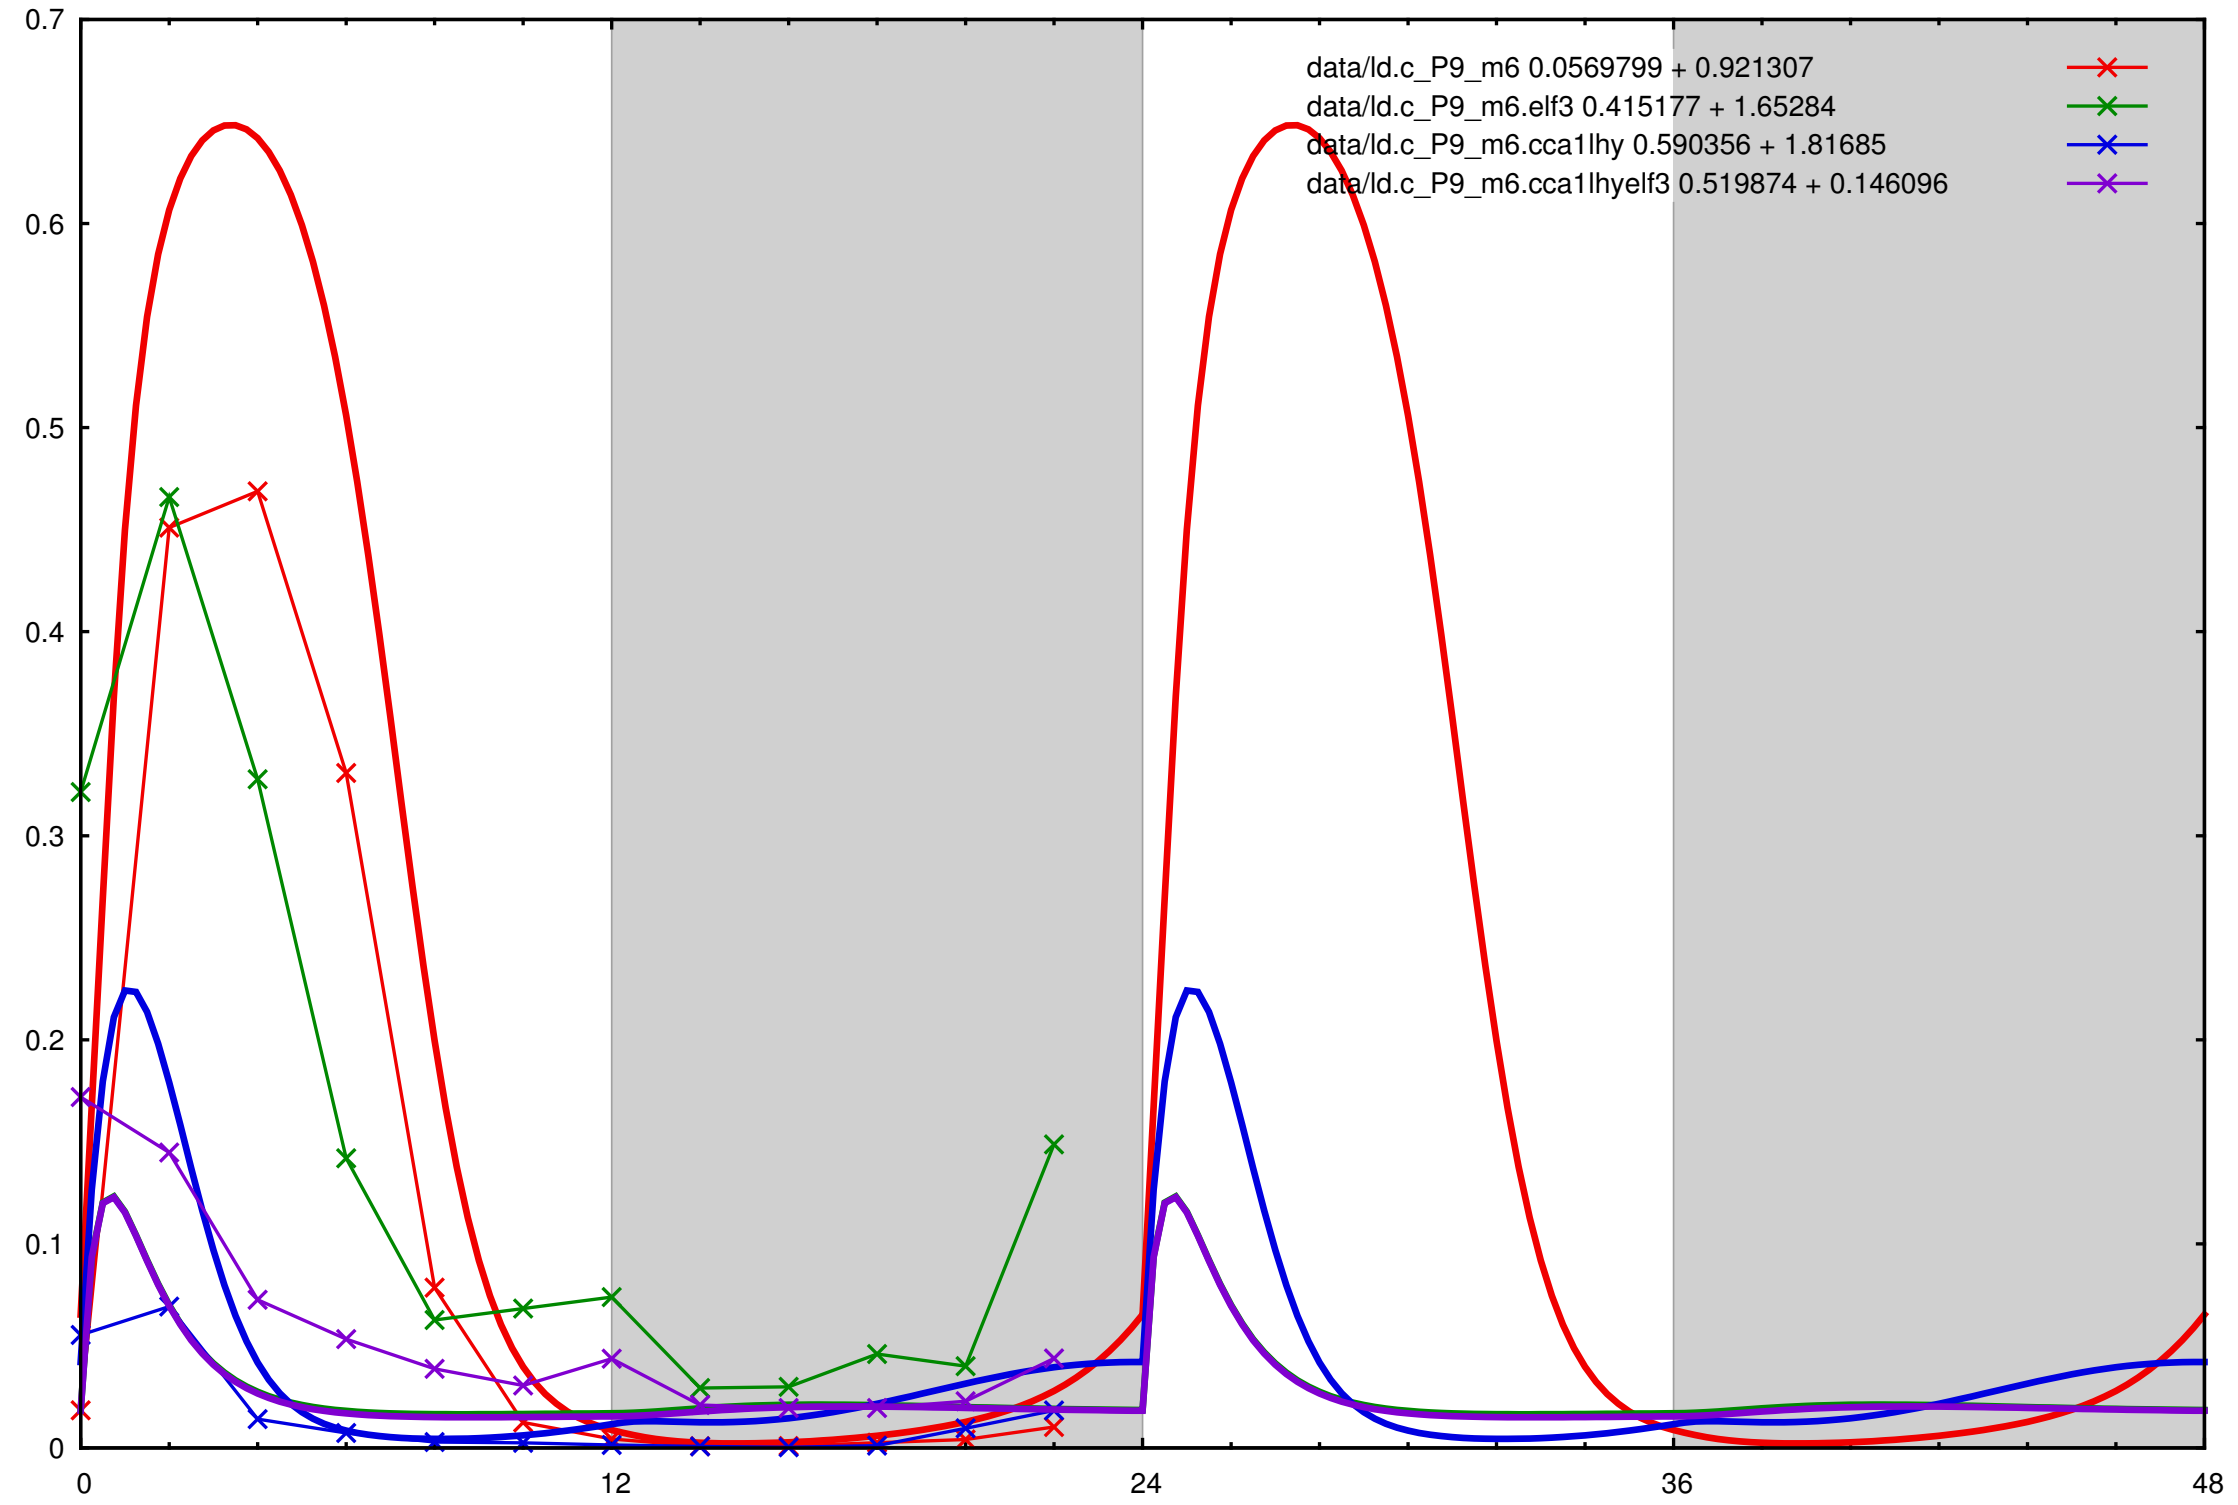



Scale group 49, scost 0.275728

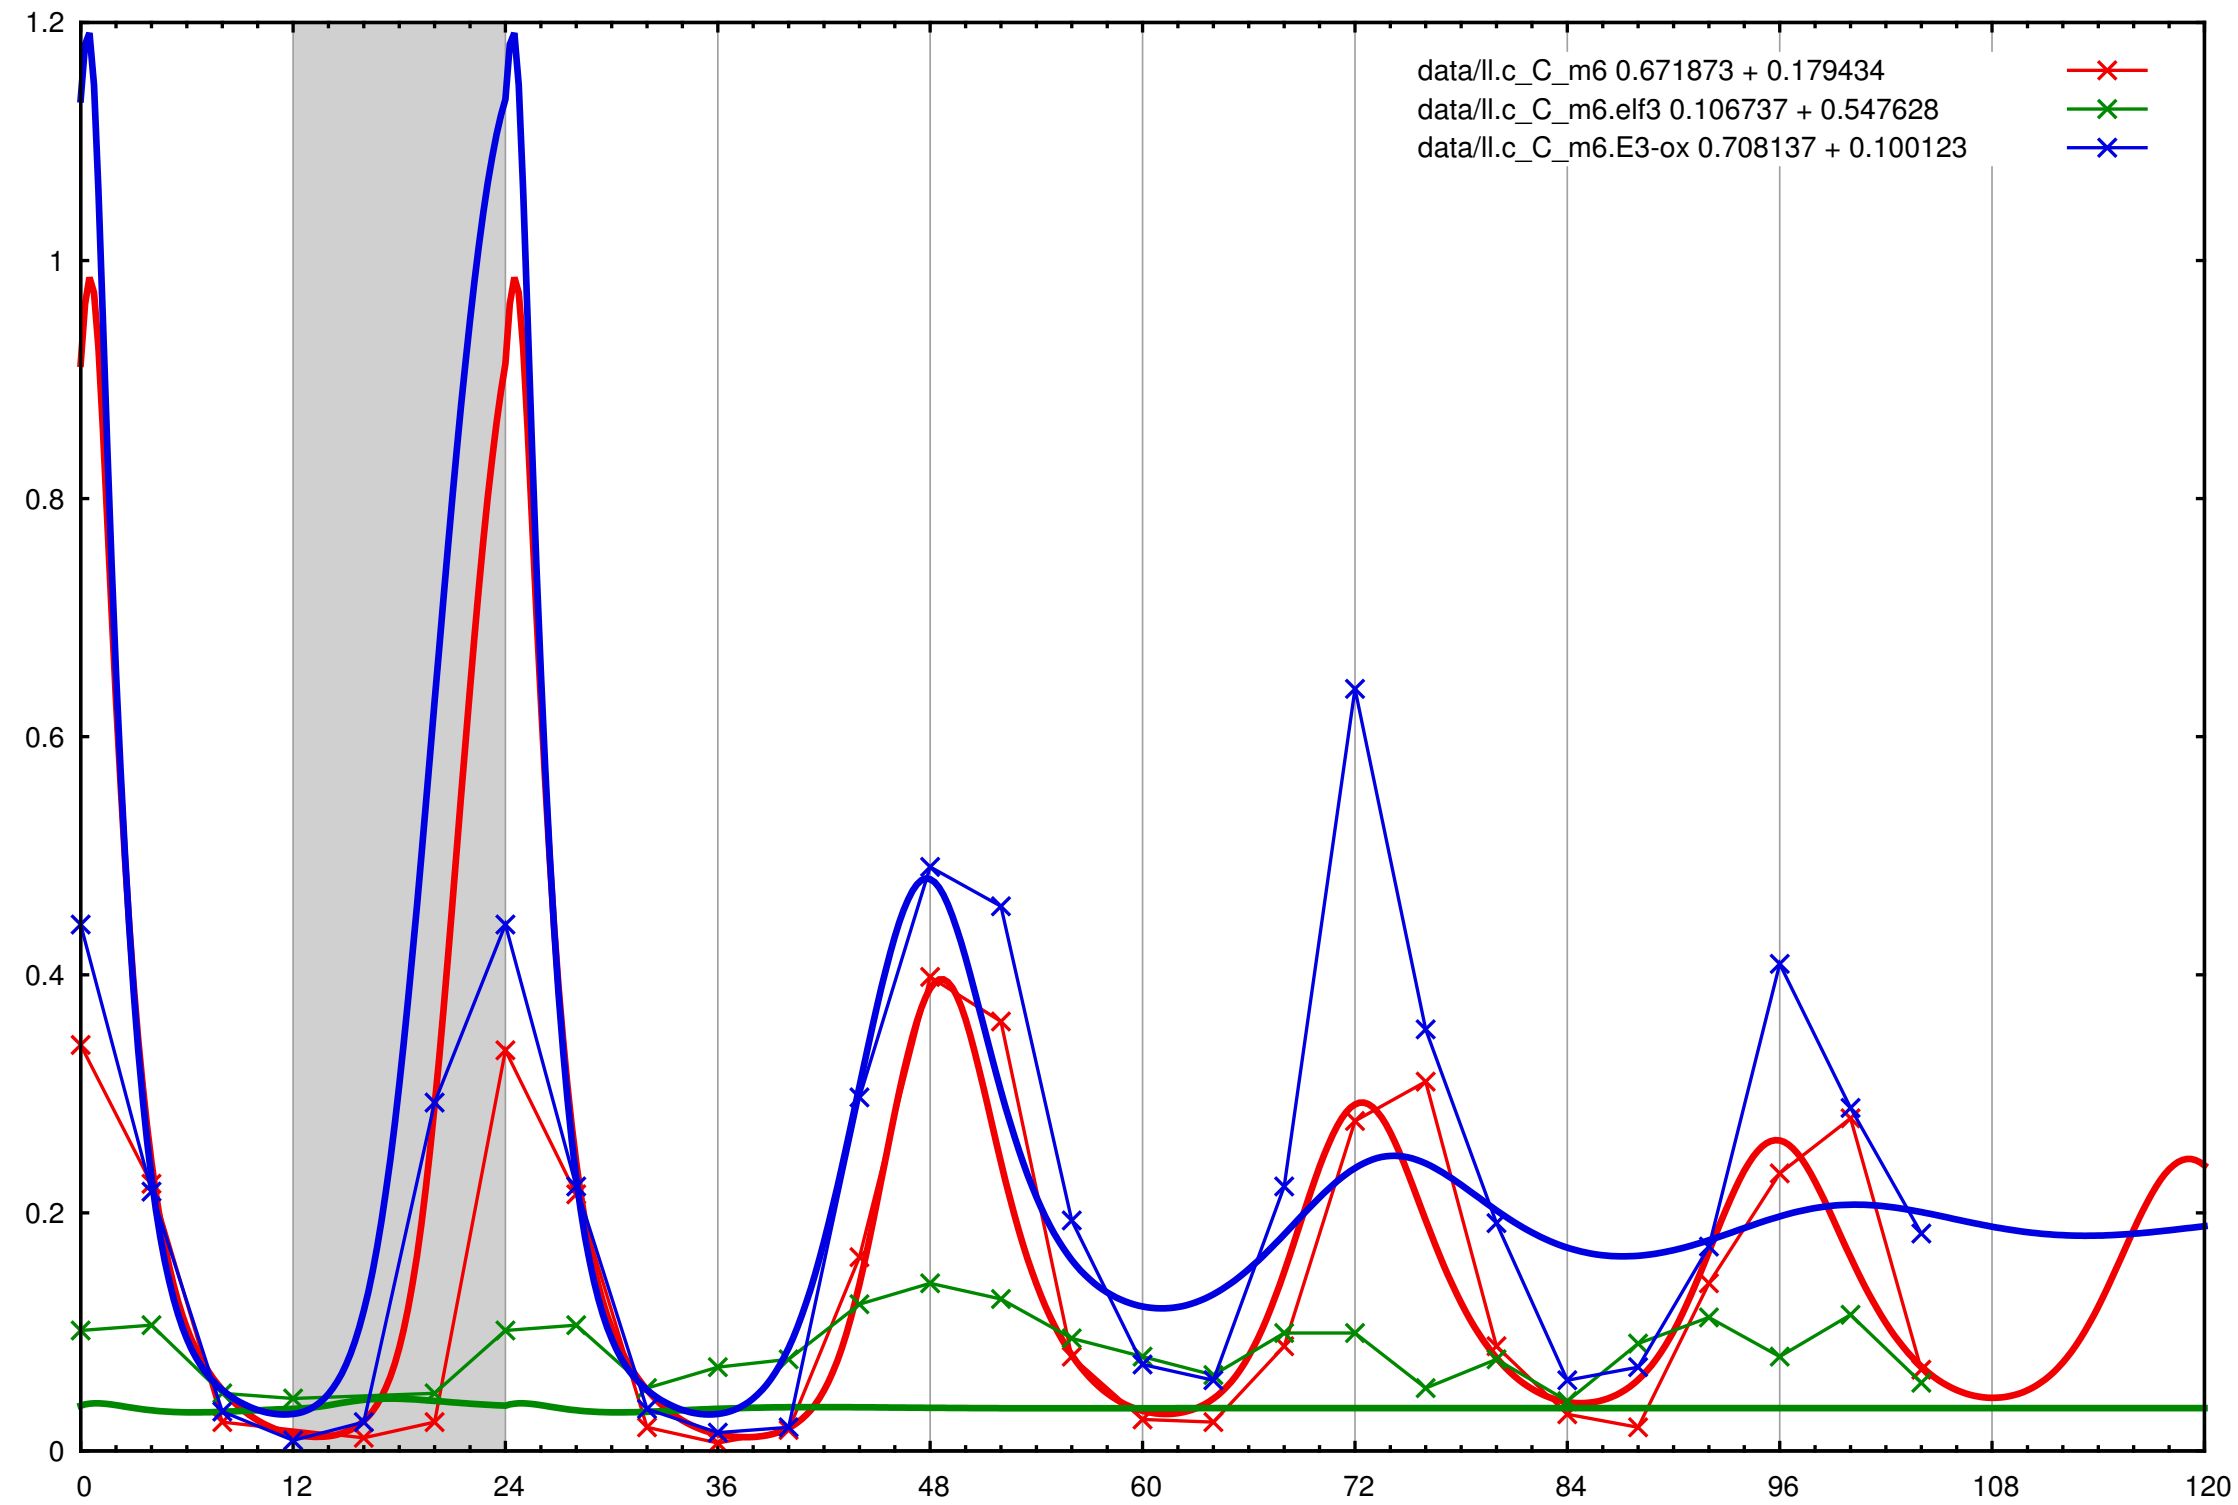

Scale group 50, scost 2.94039

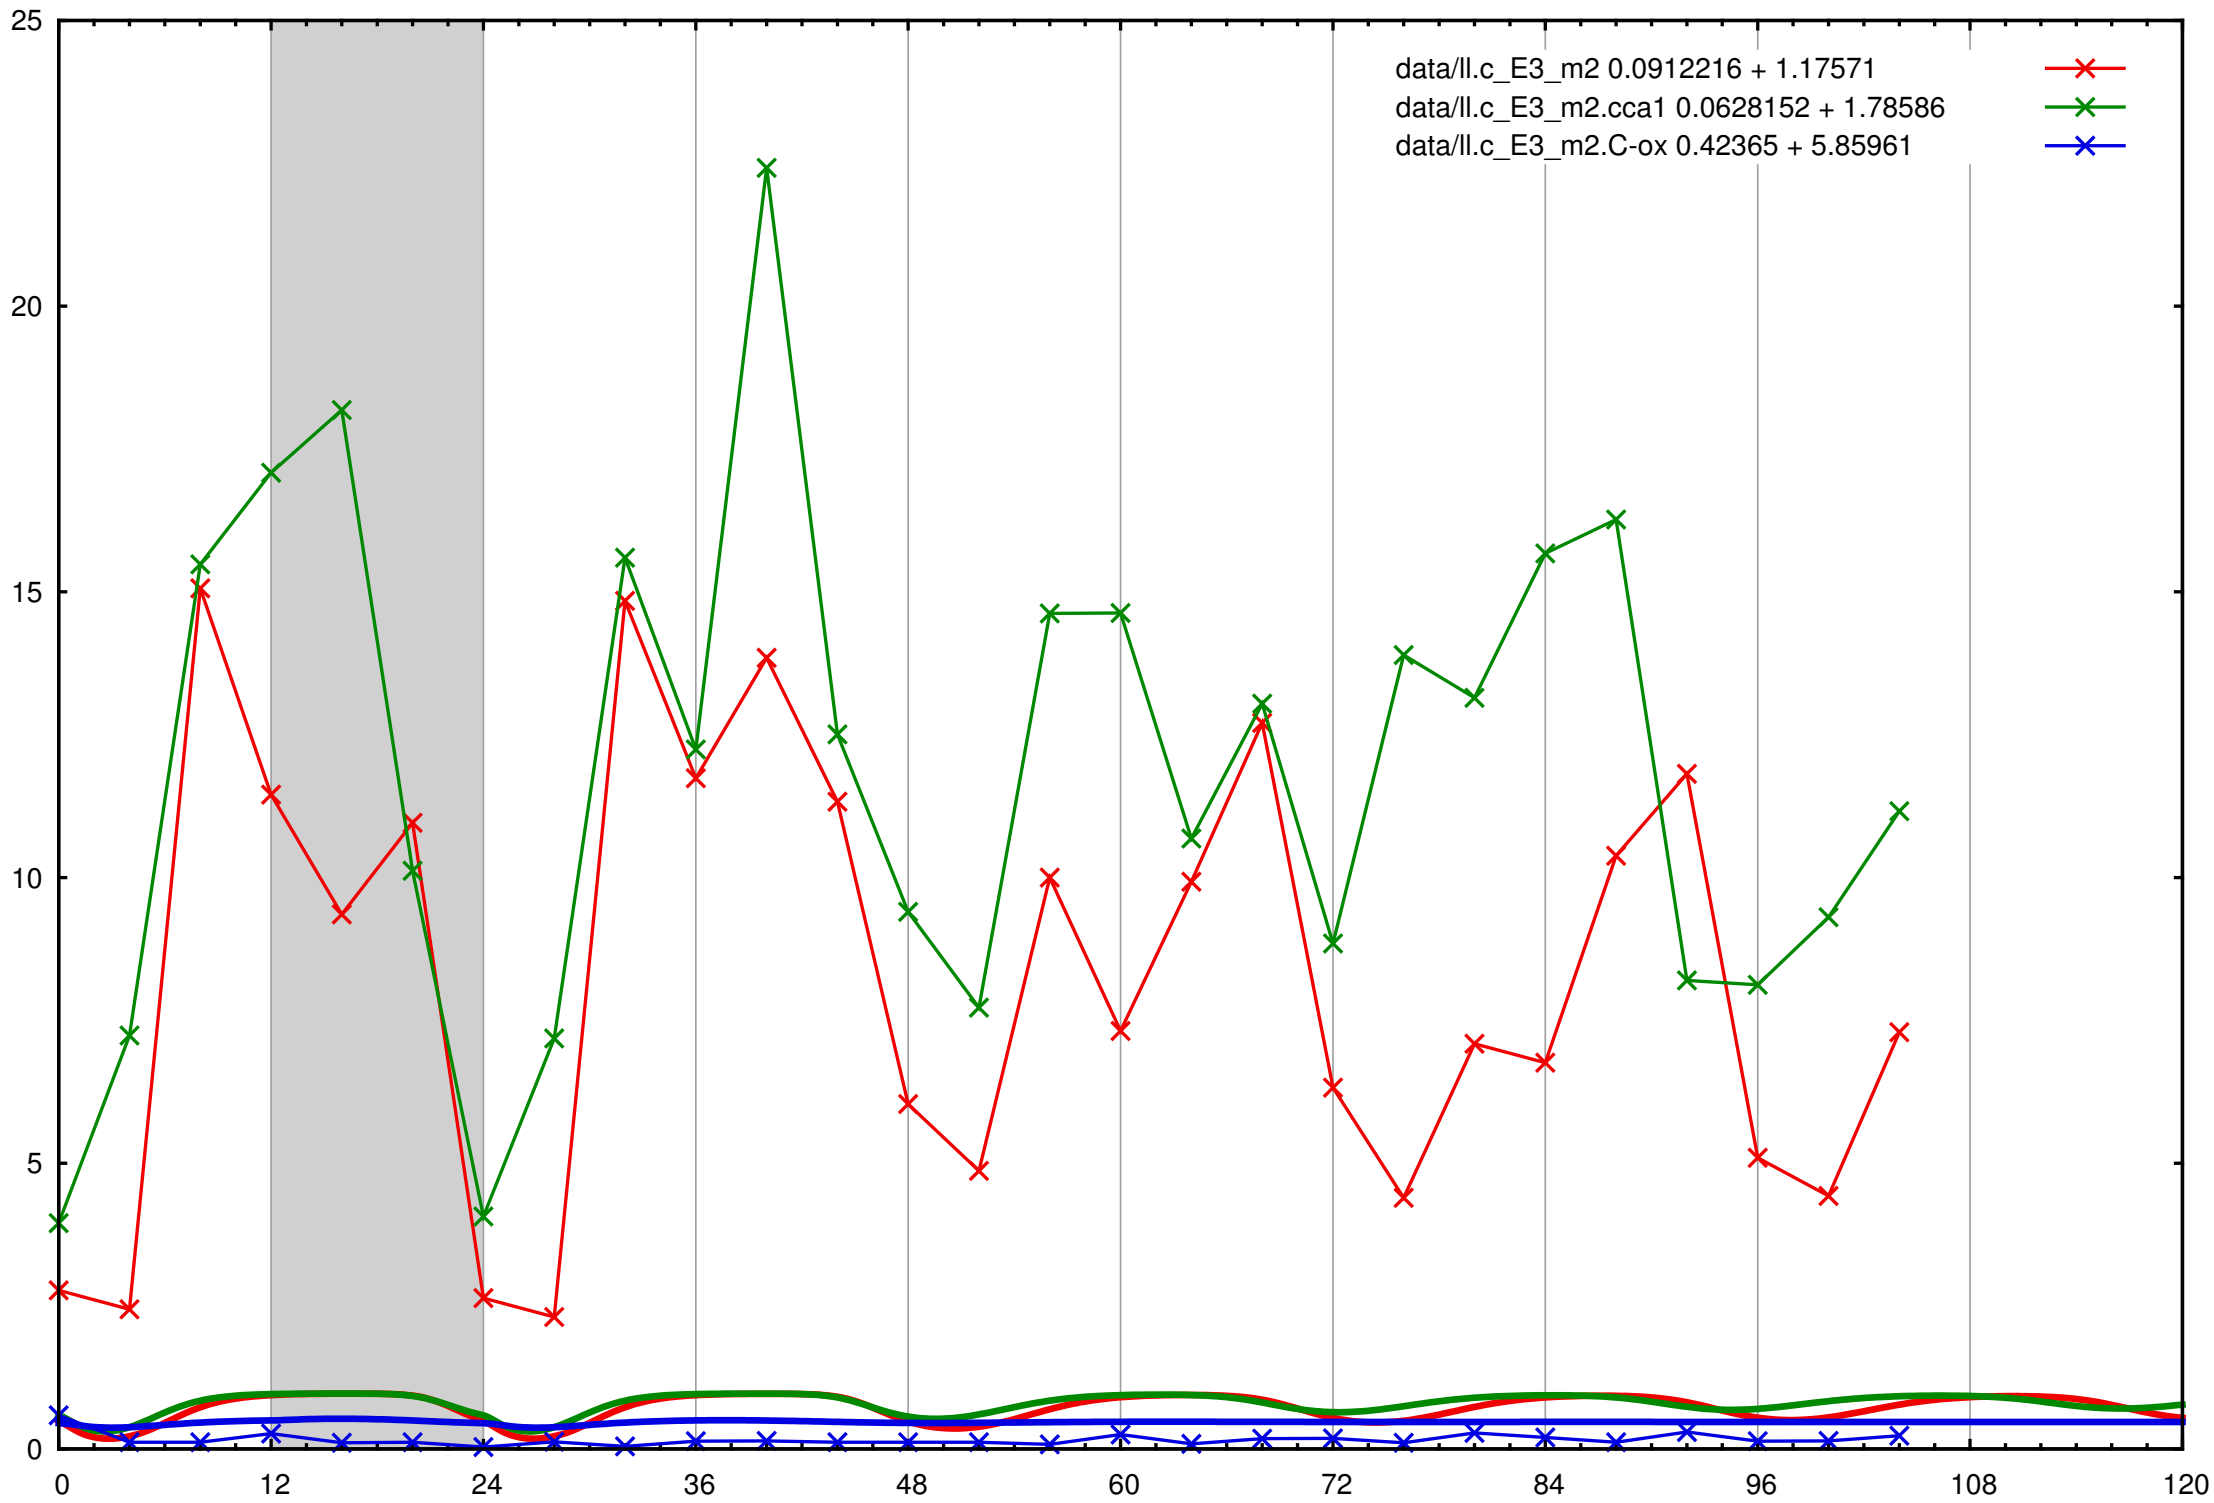

Scale group 51, scost 0.0326475

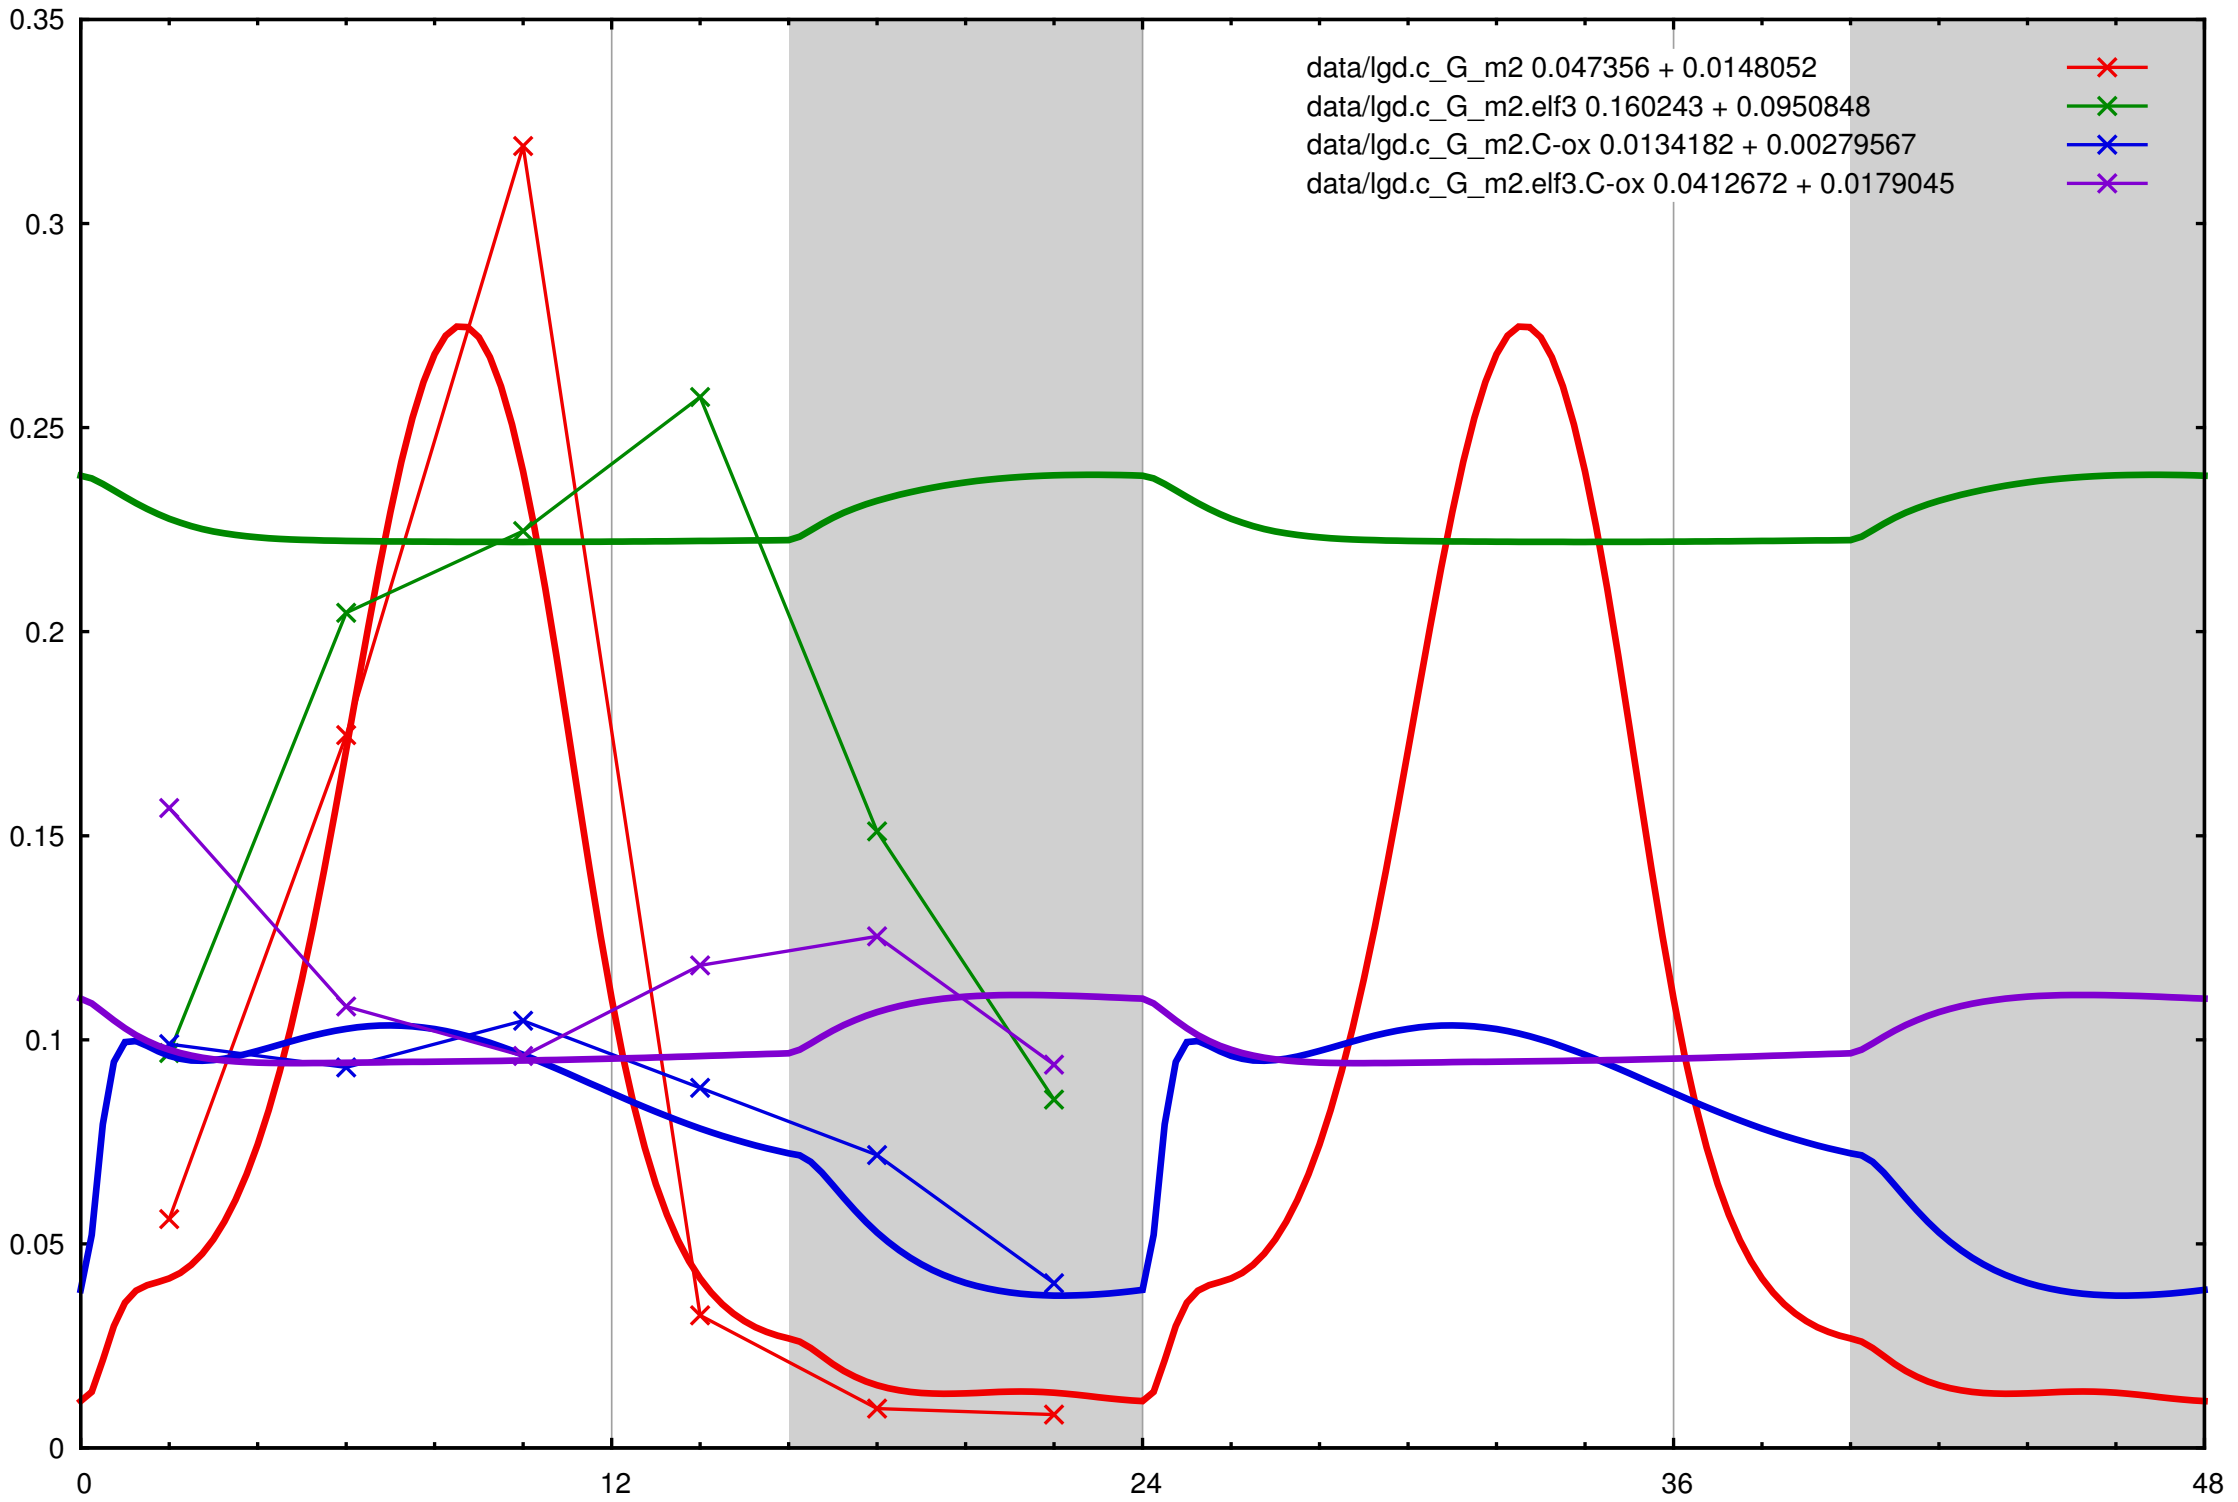

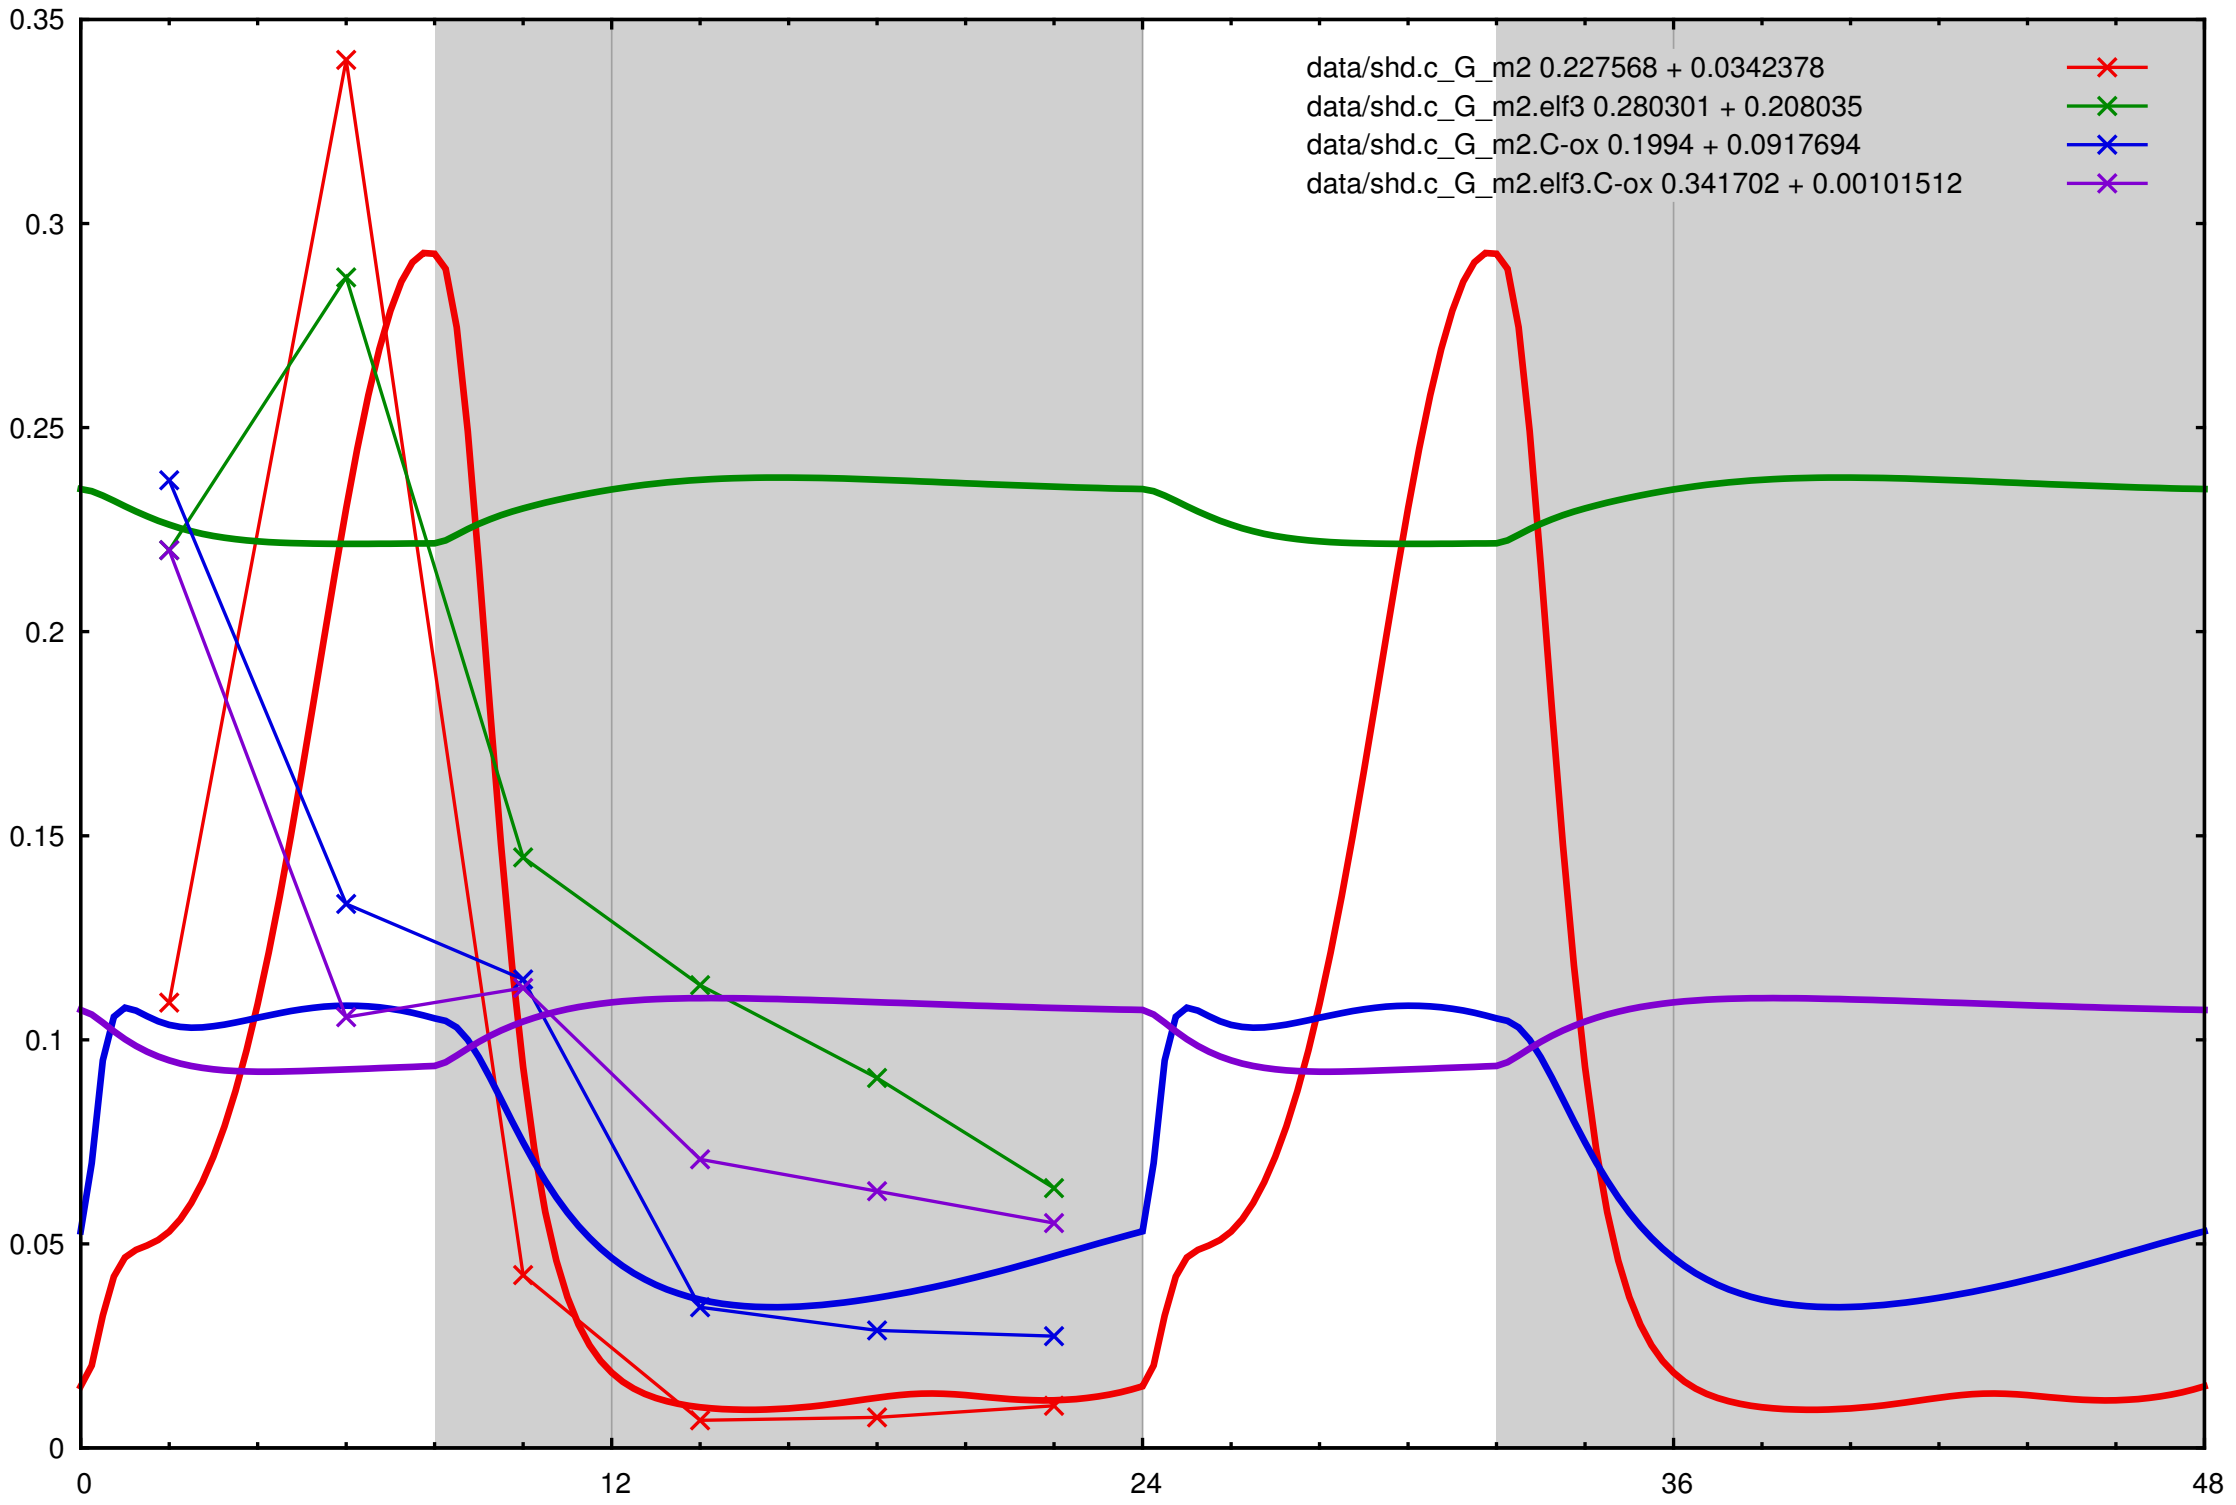

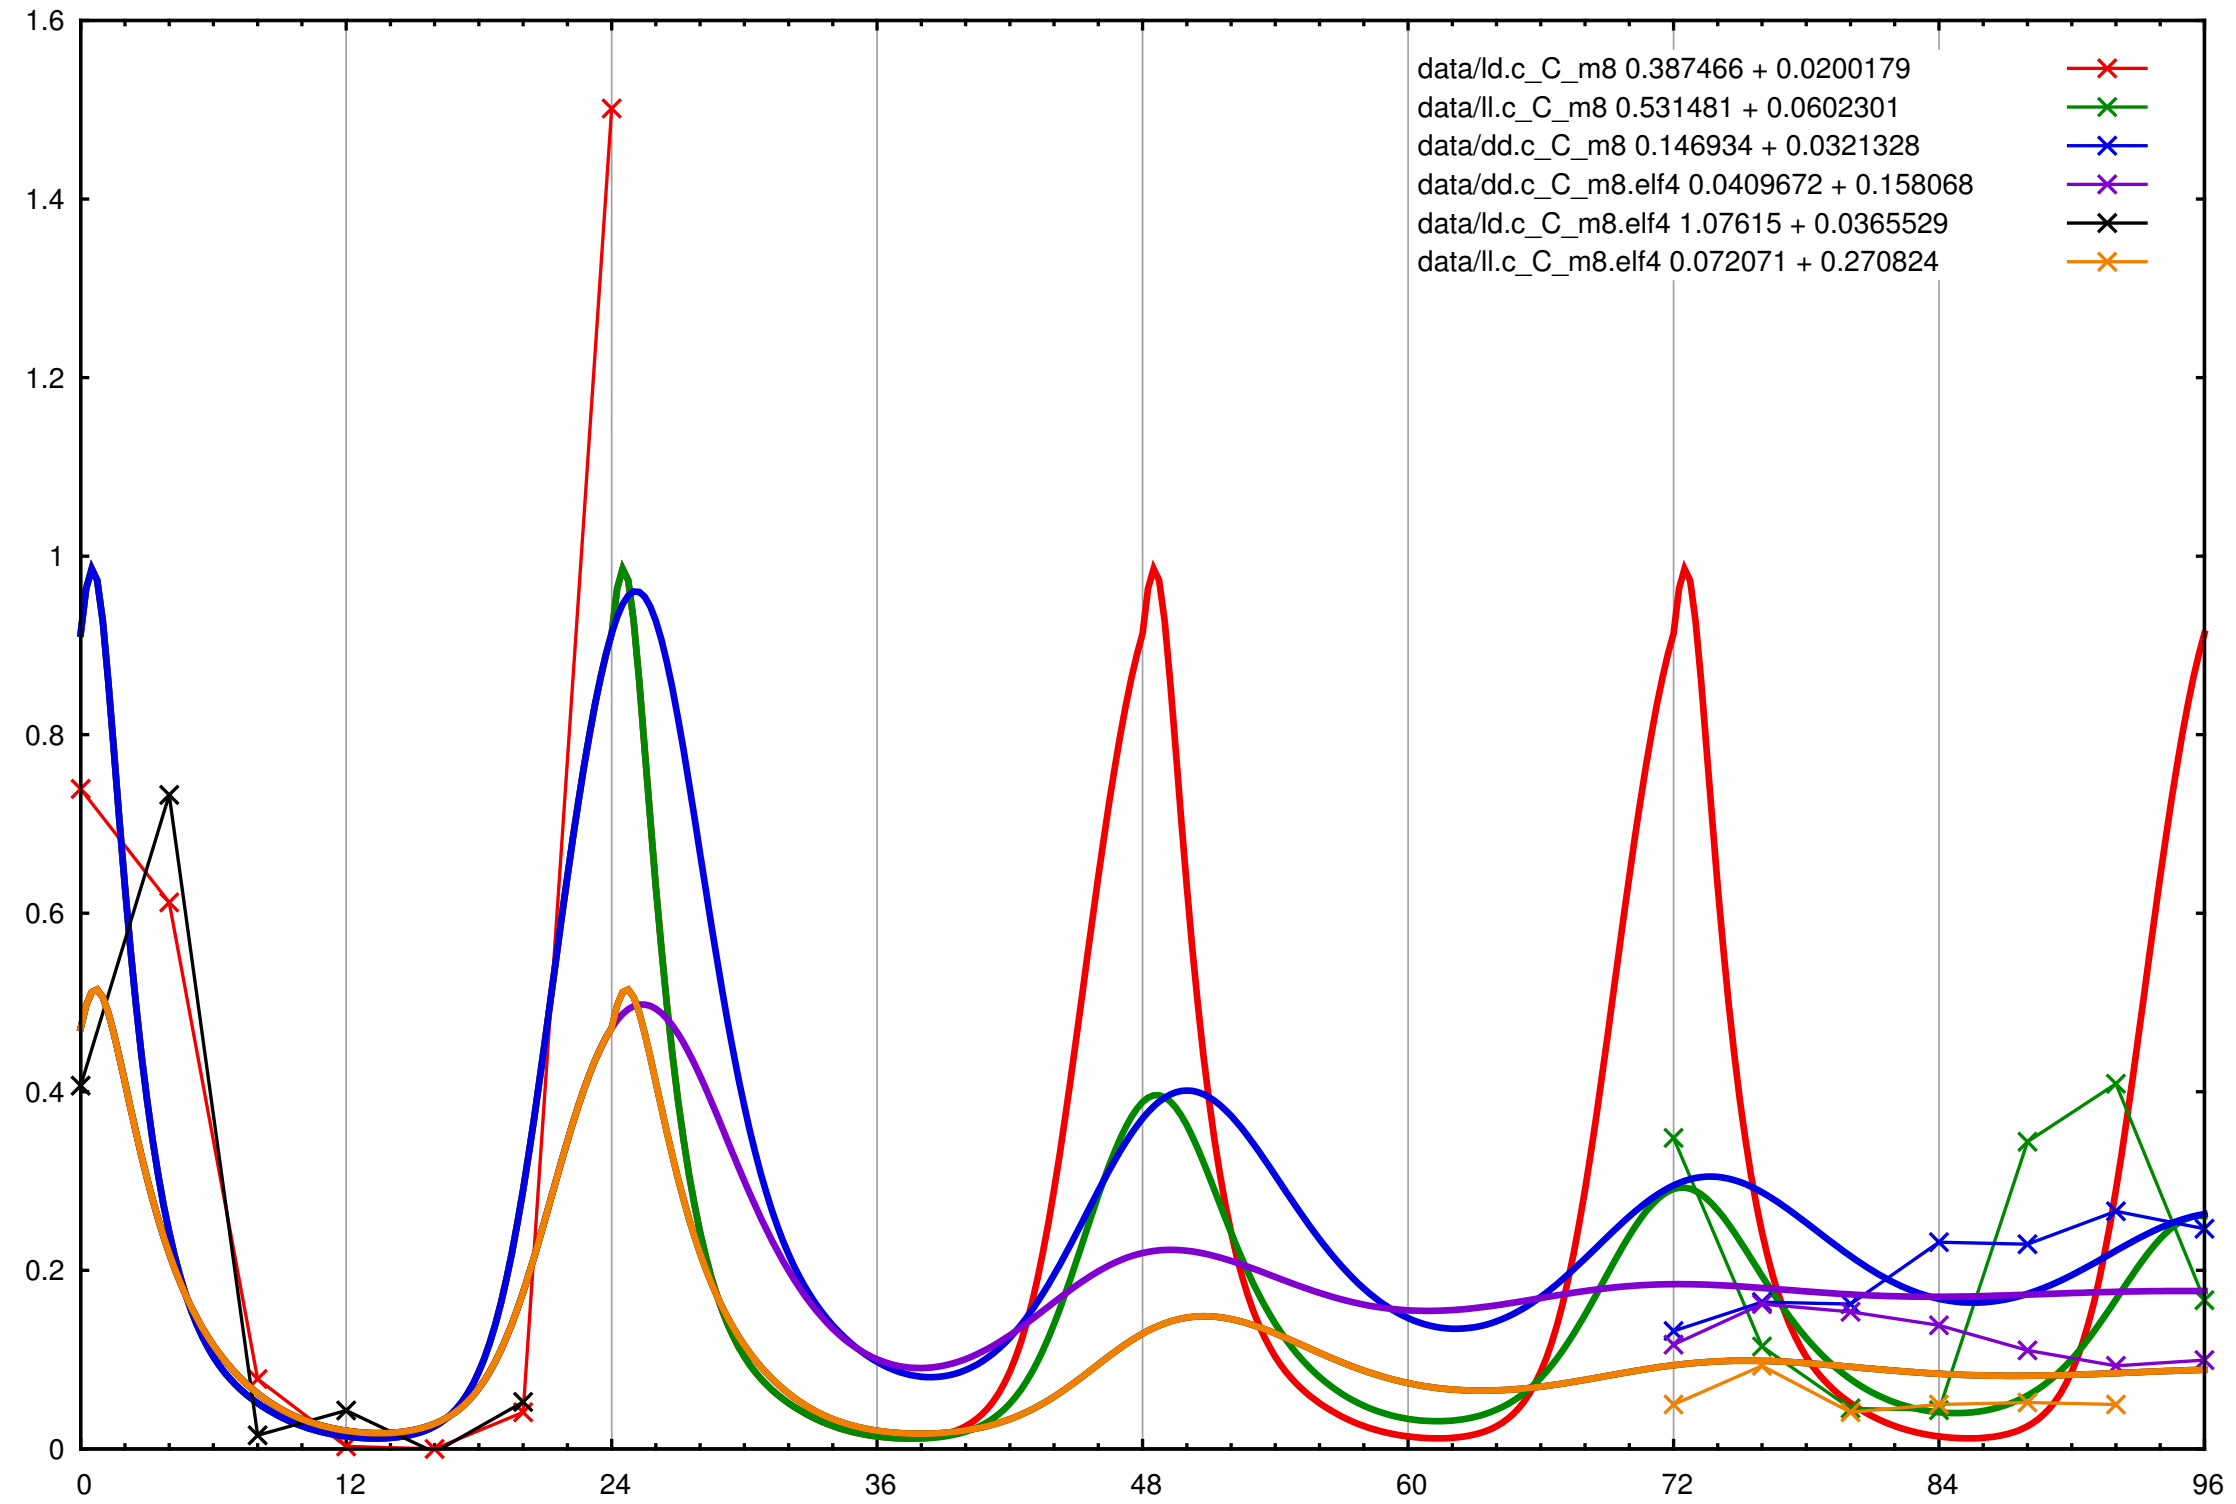

Scale group 54, scost 0.2063

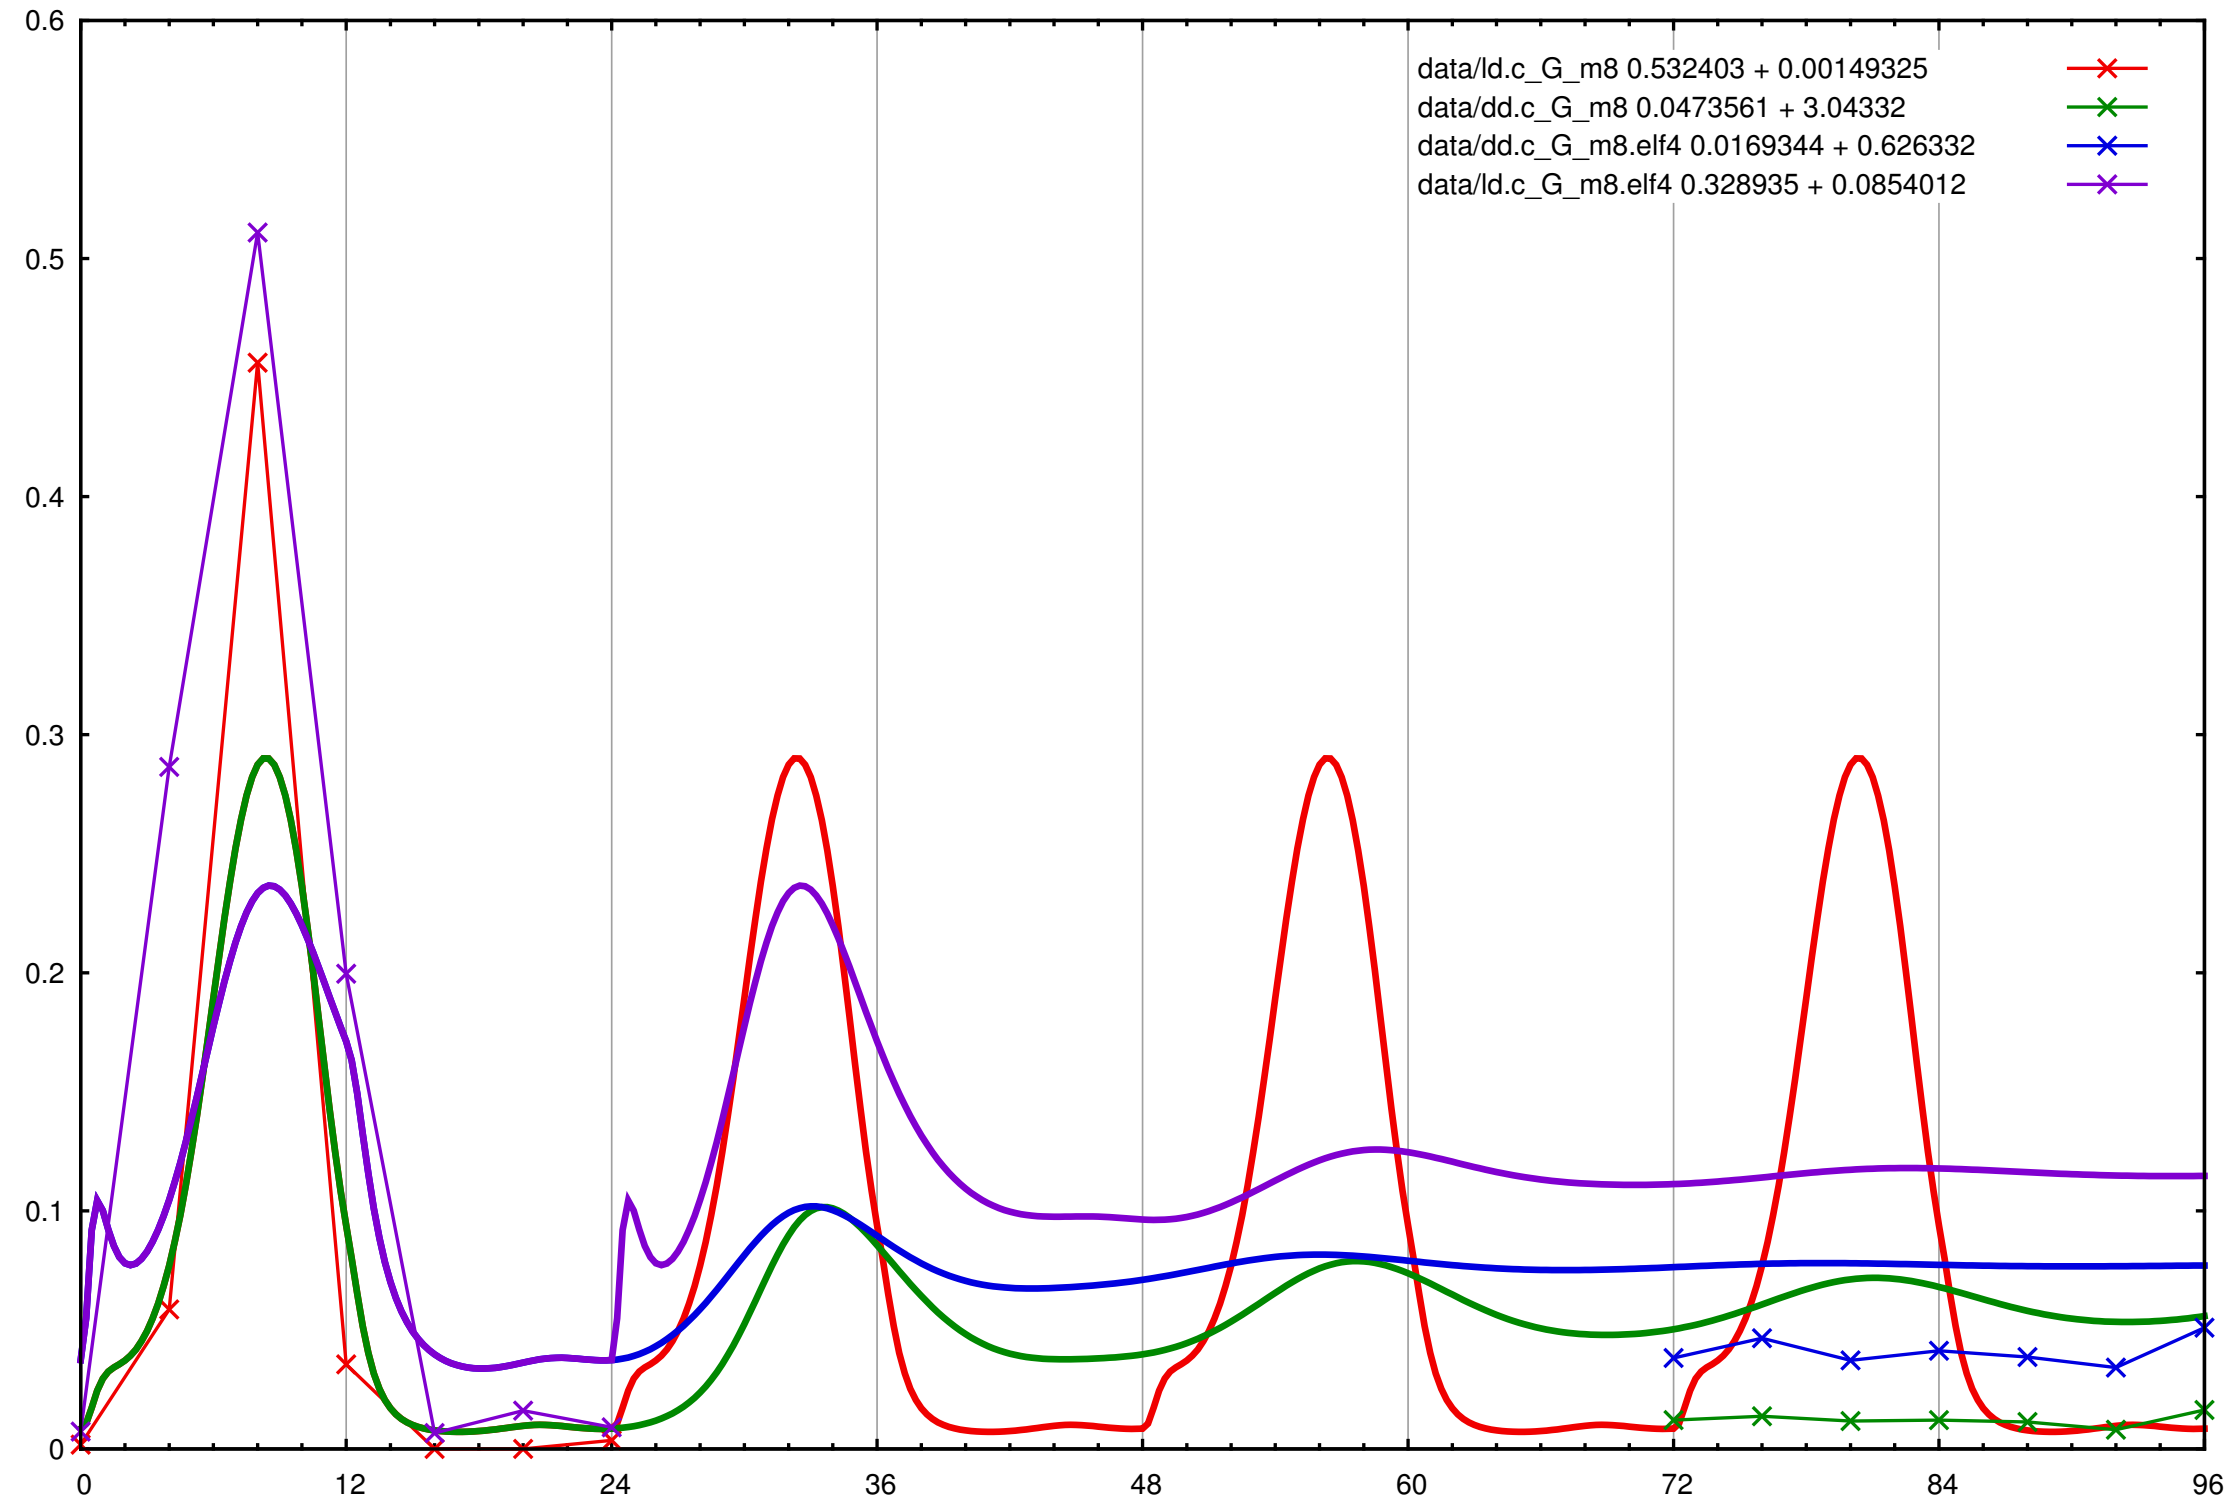

Scale group 55, scost 0.683117

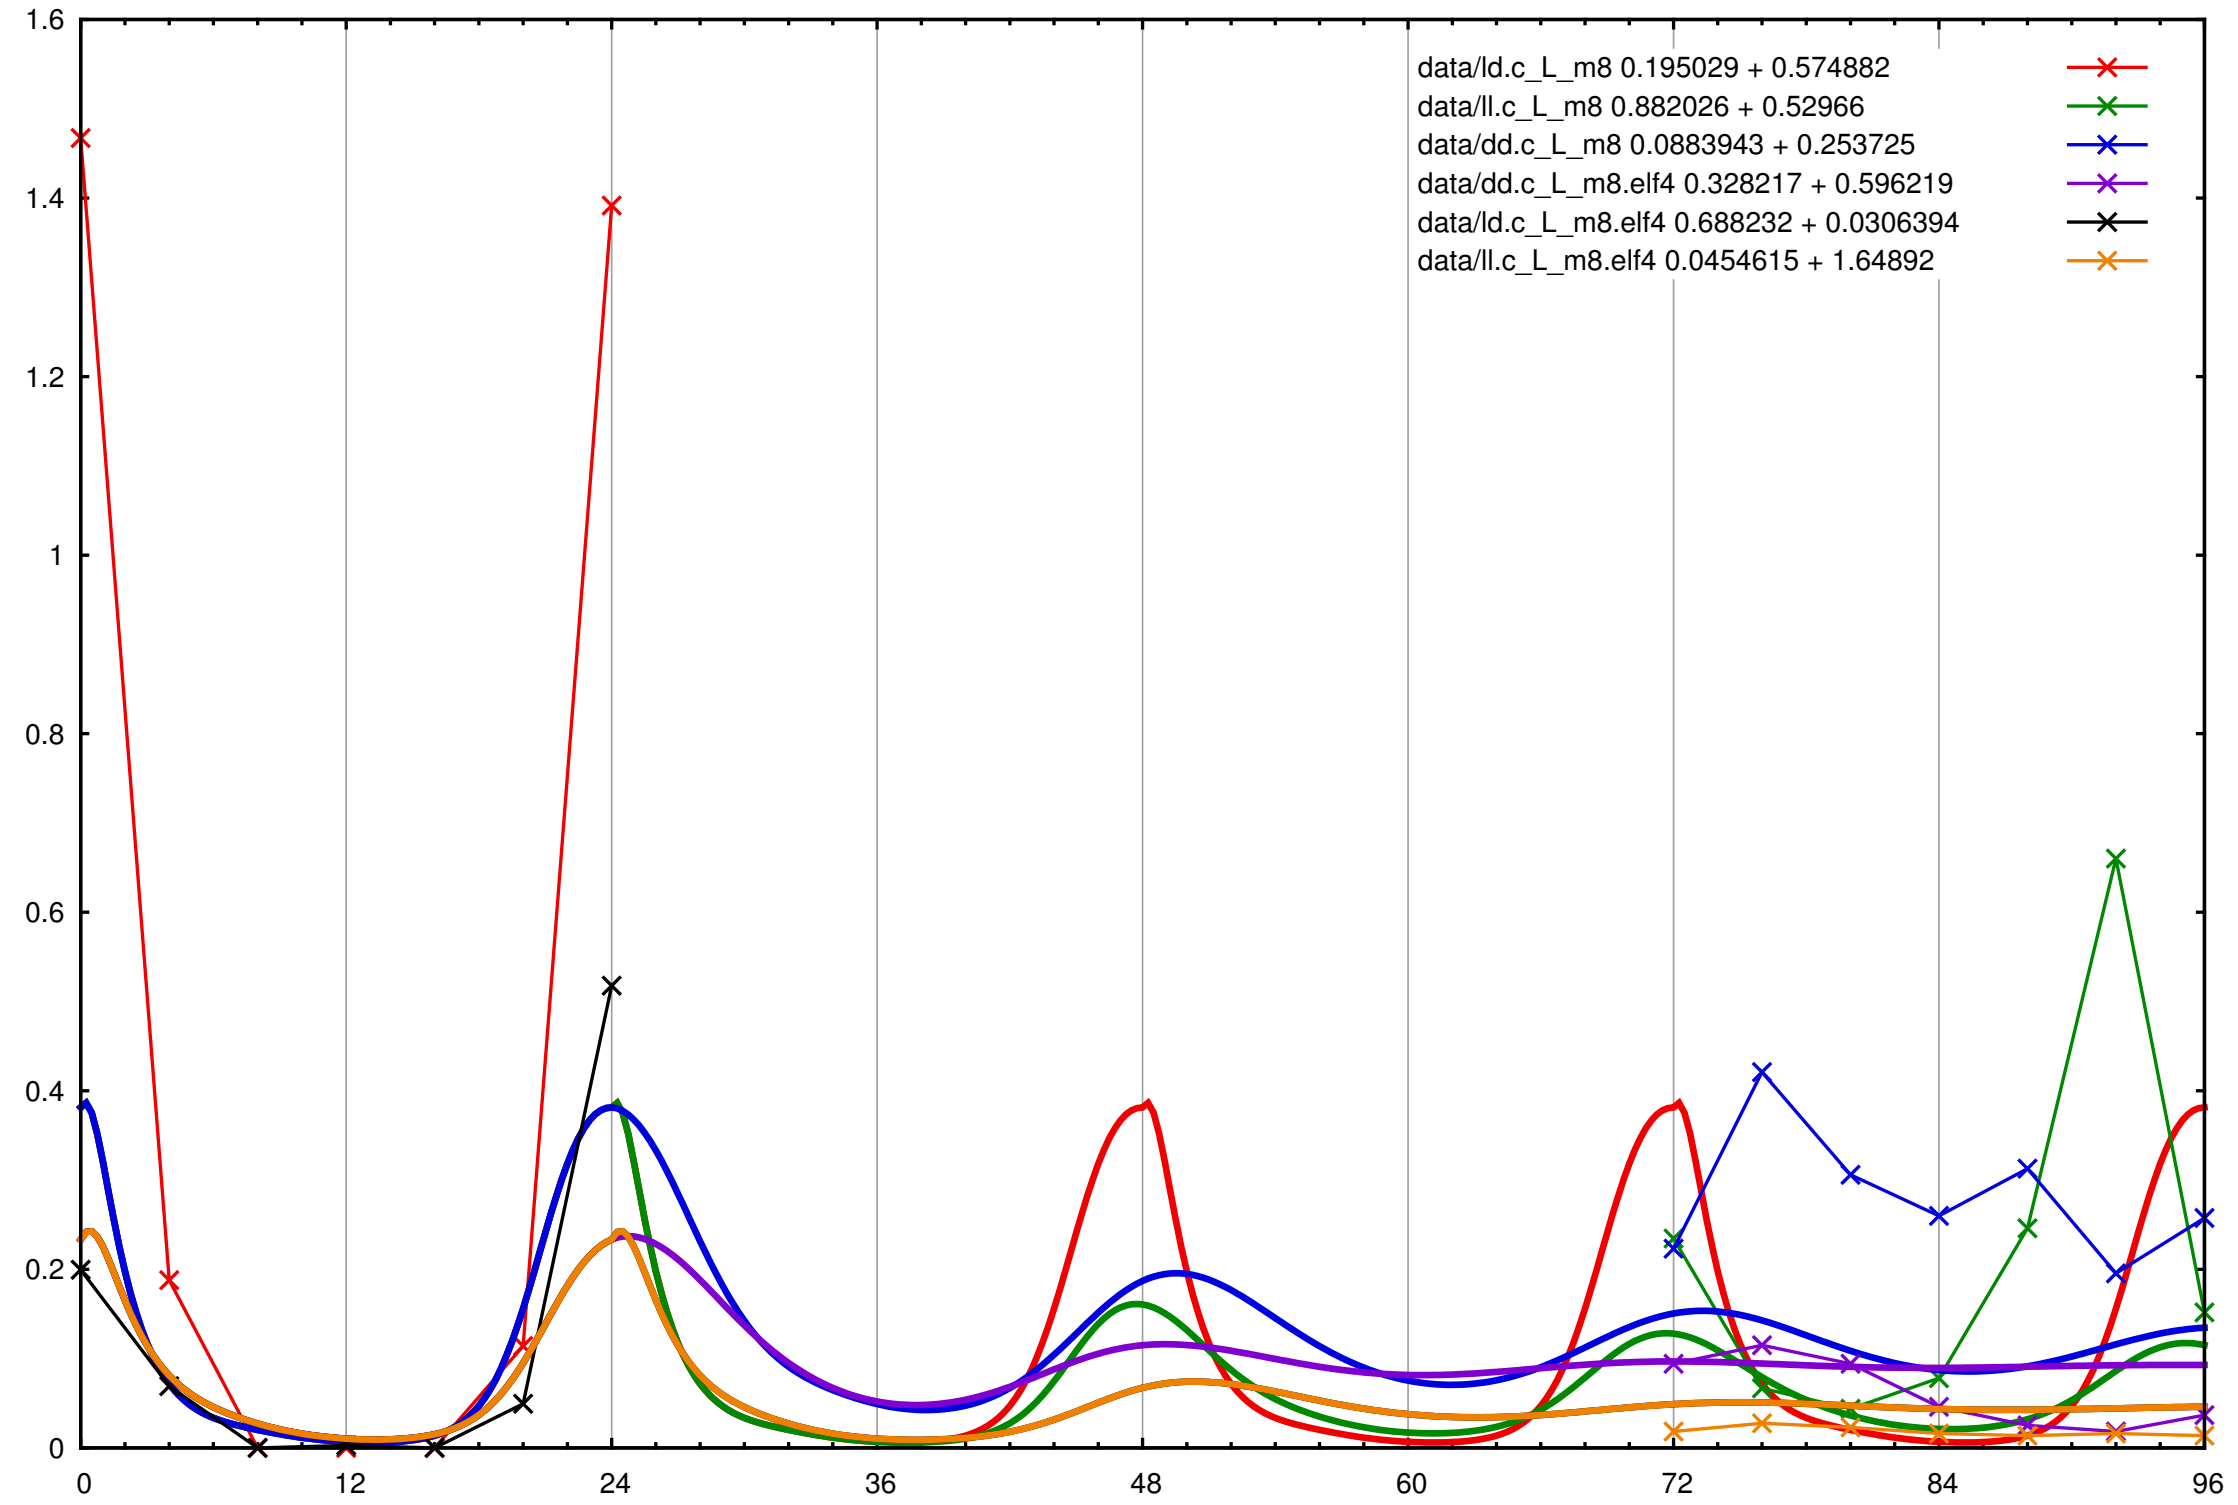

Scale group 56, scost 0.0571805

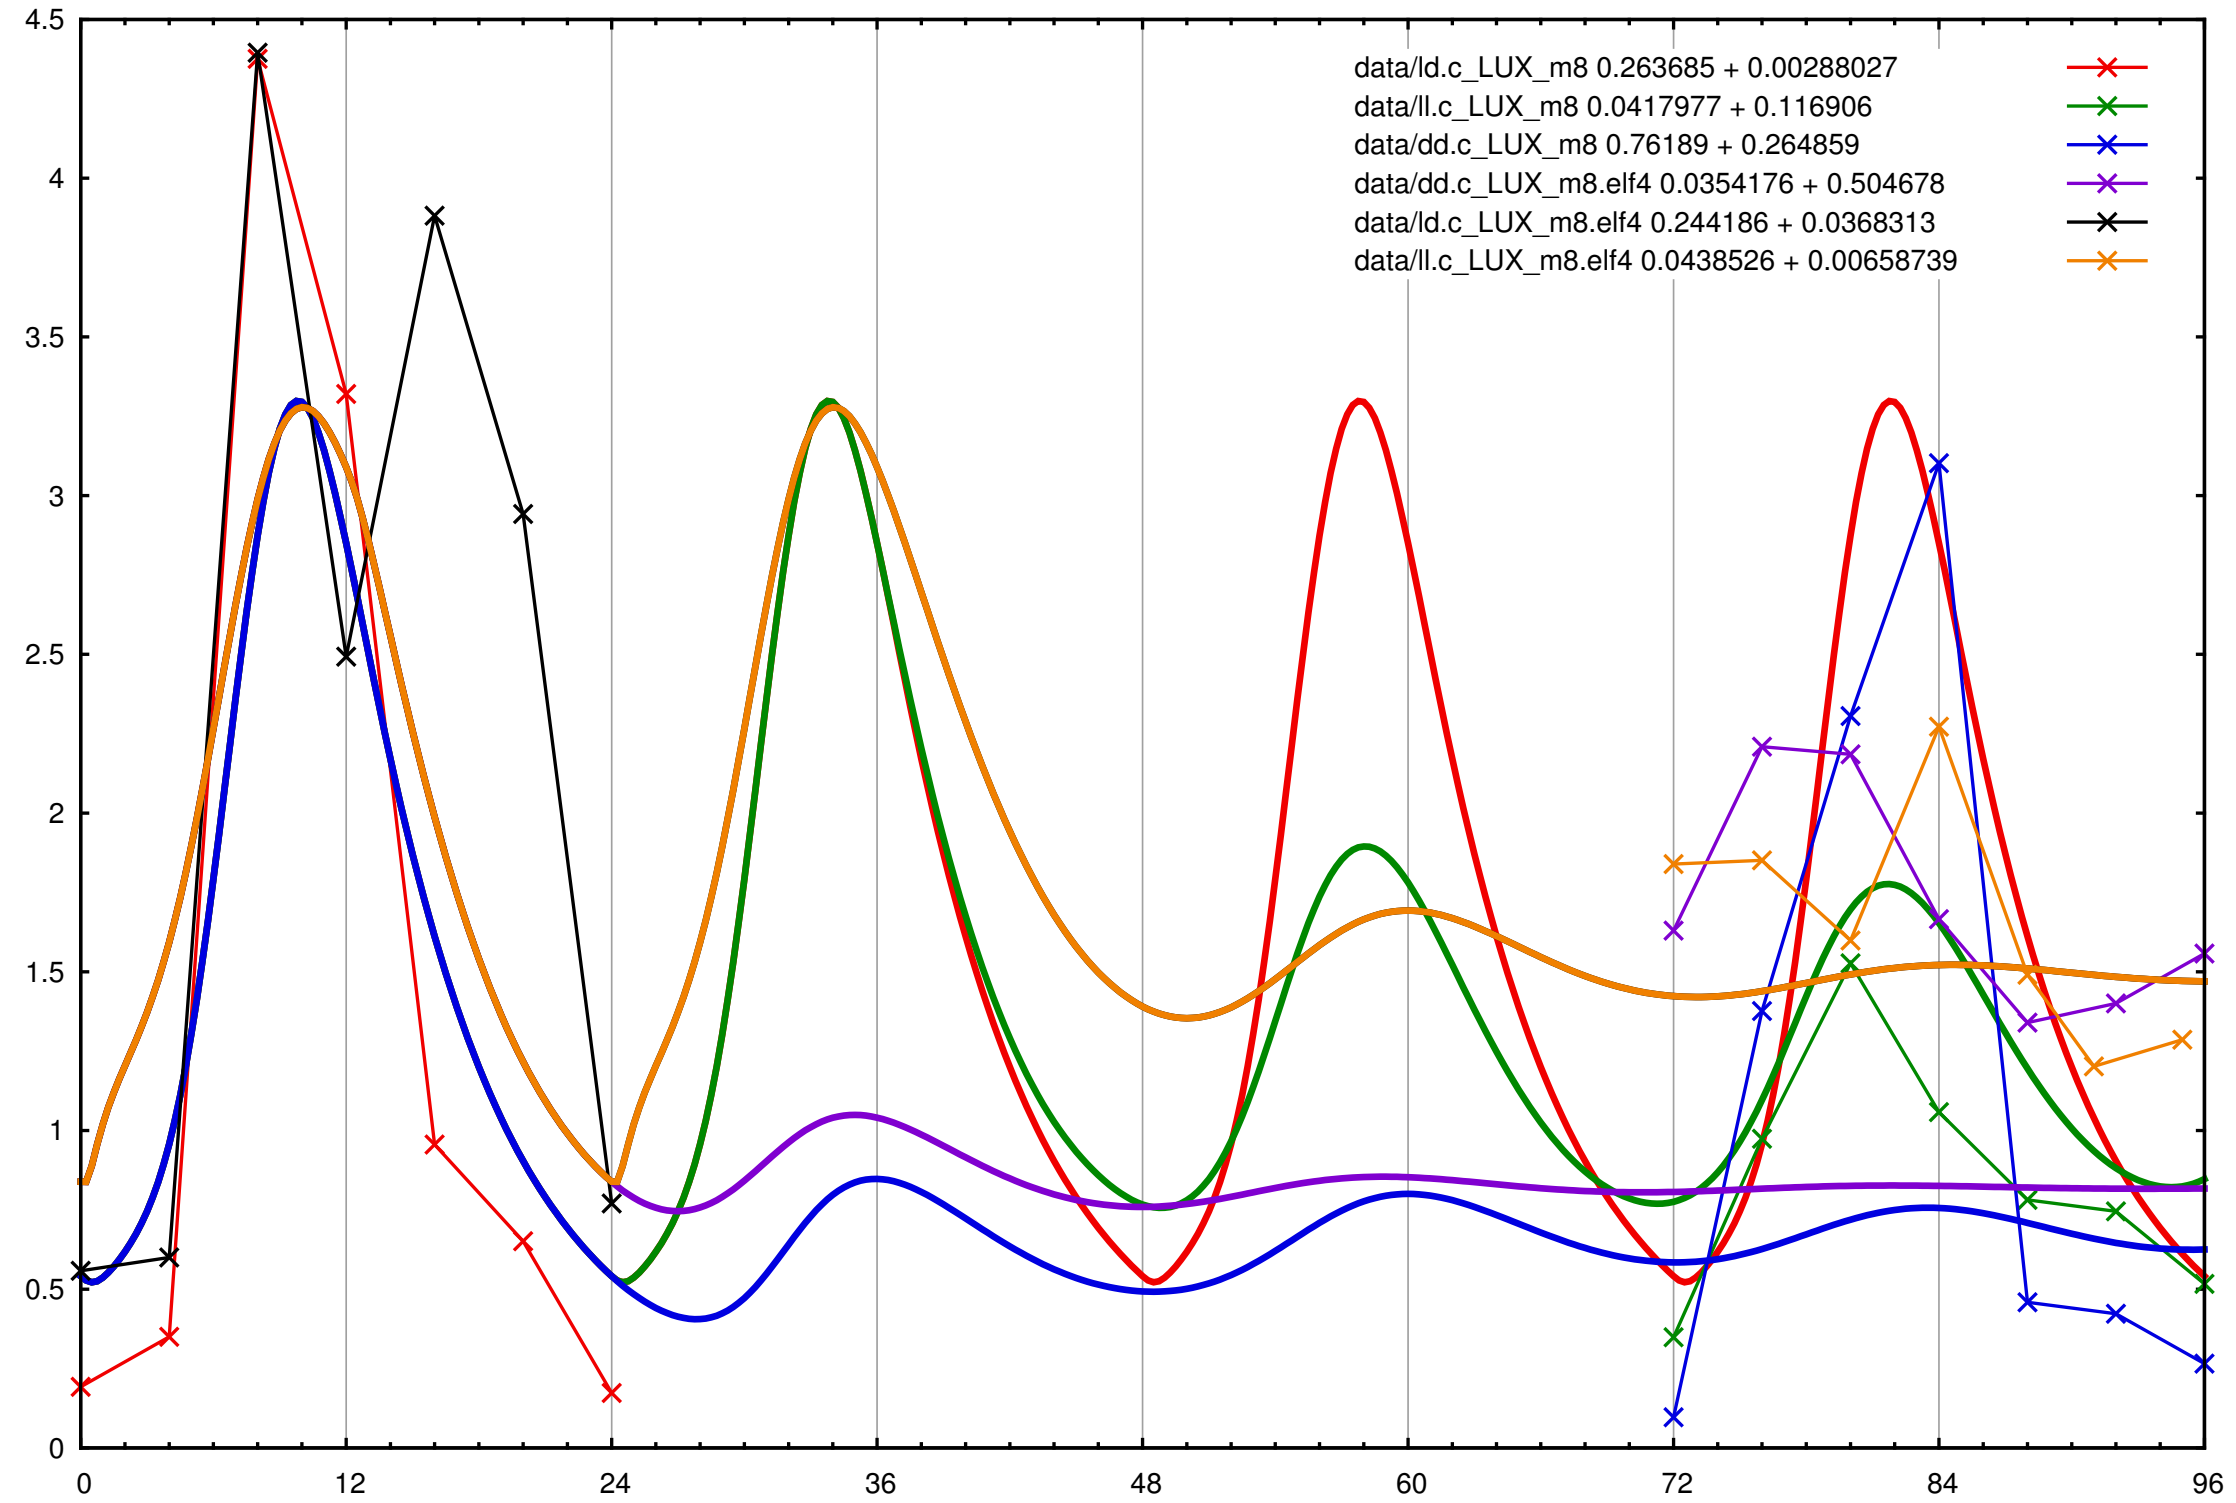



Scale group 57, scost 0.28025

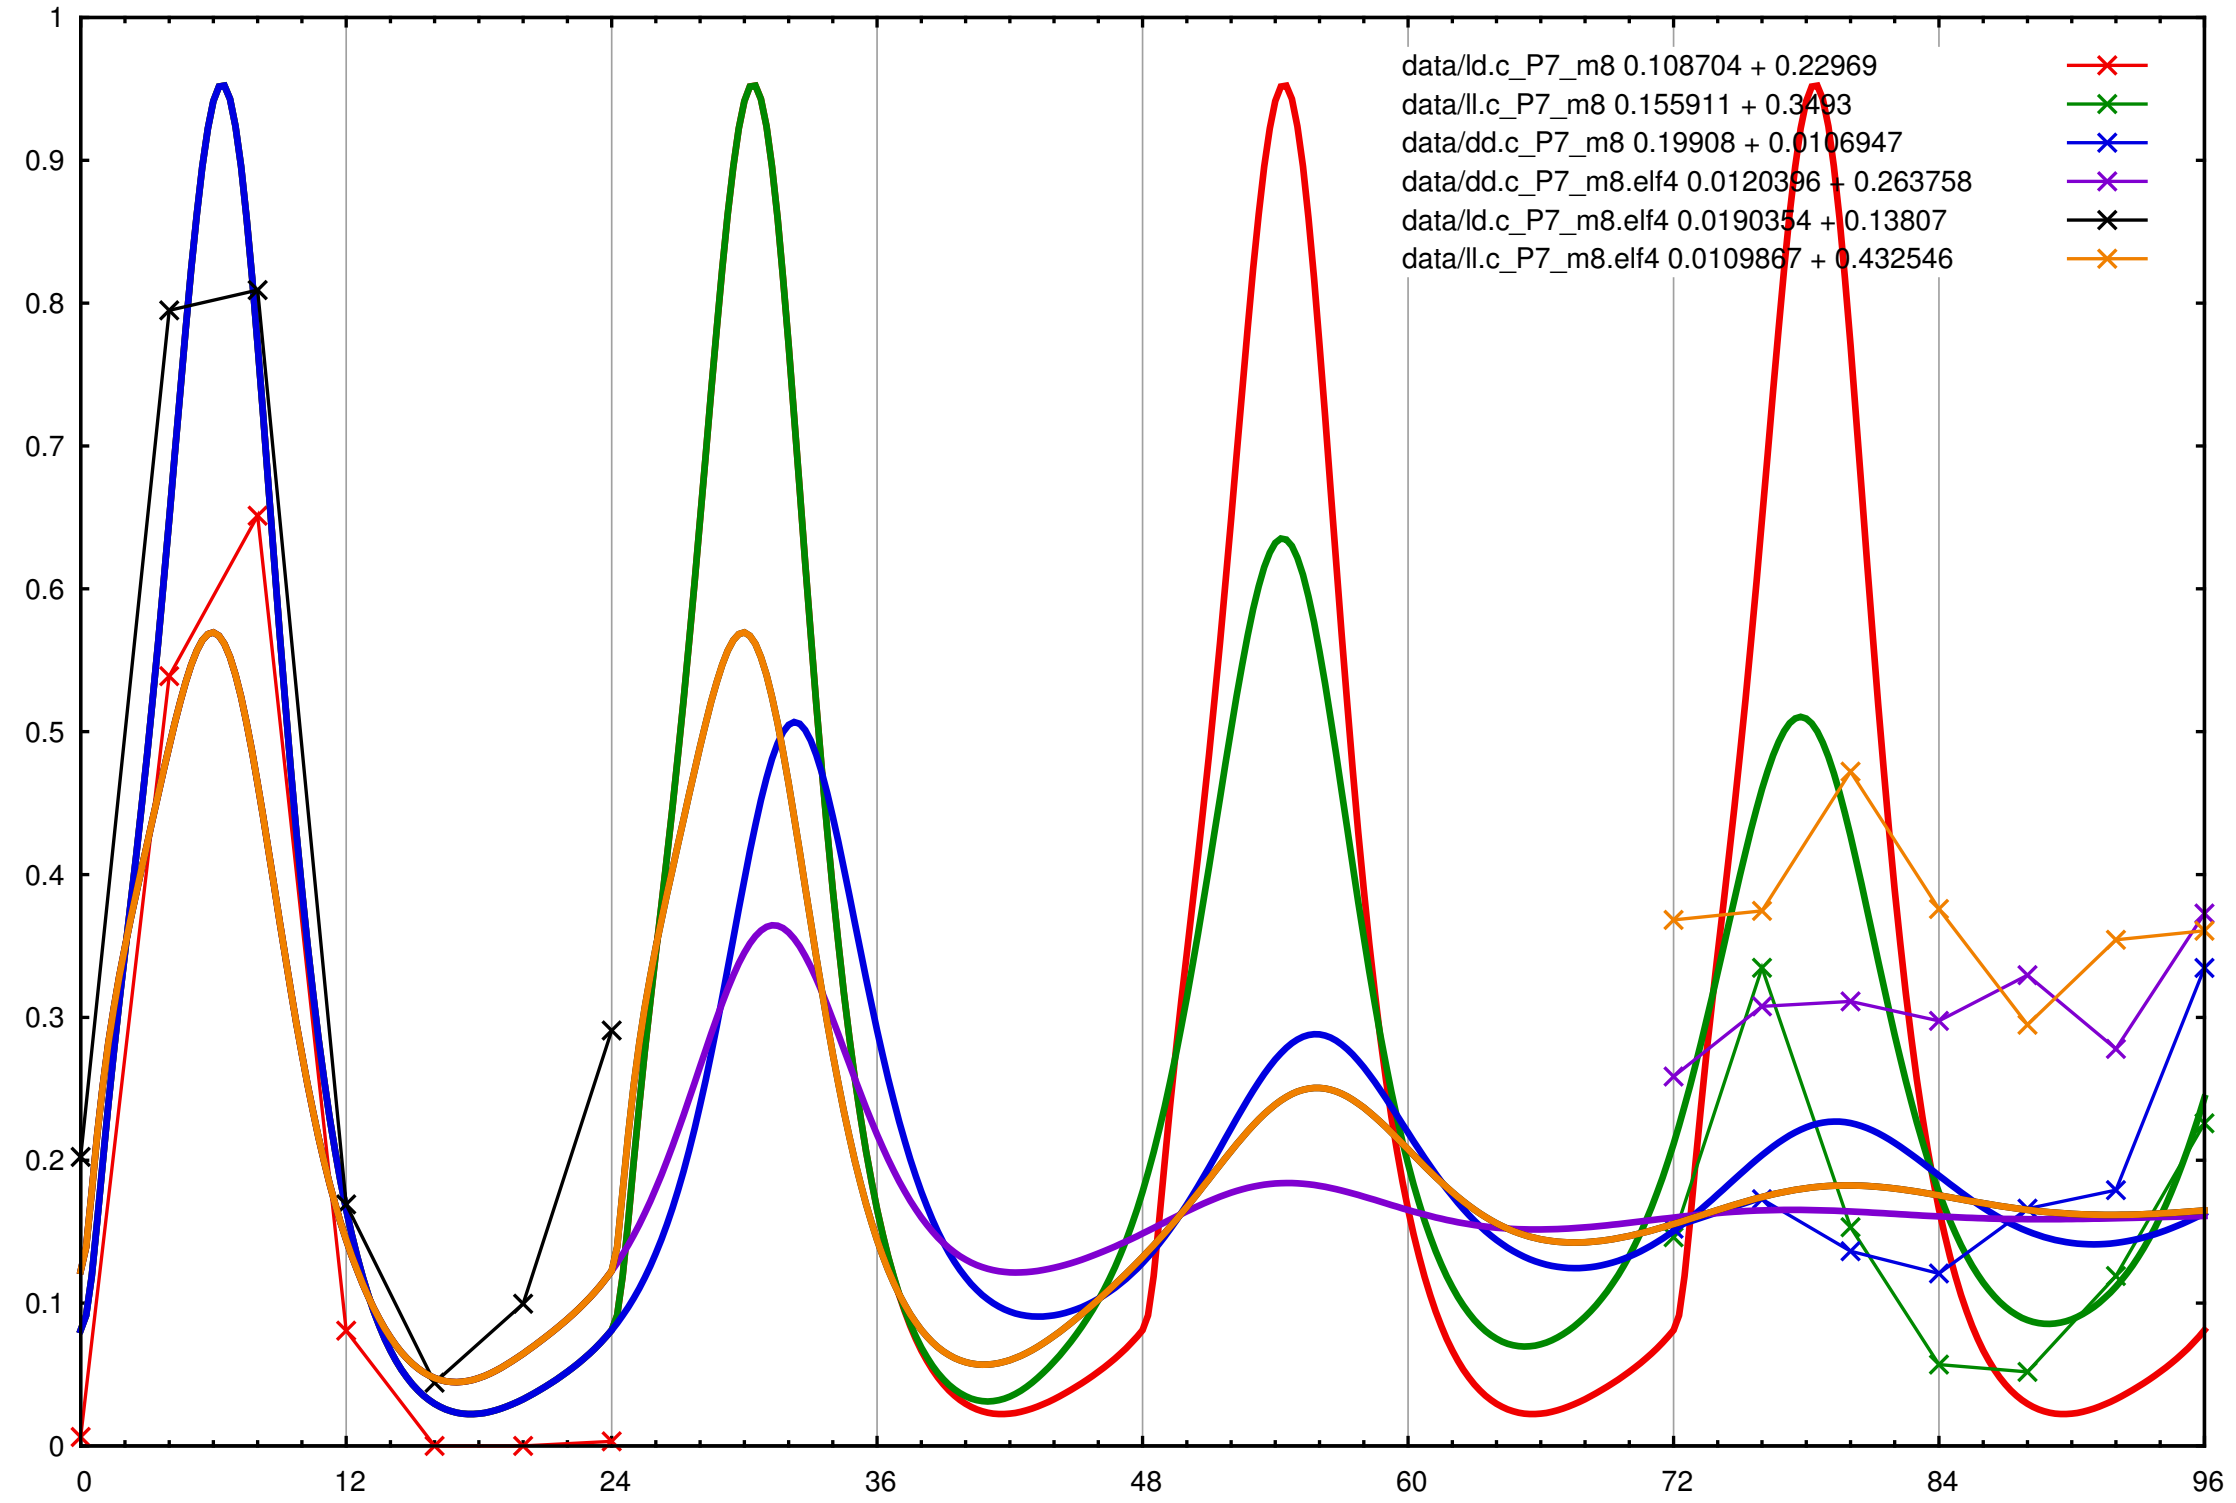

Scale group 58, scost 0.137878

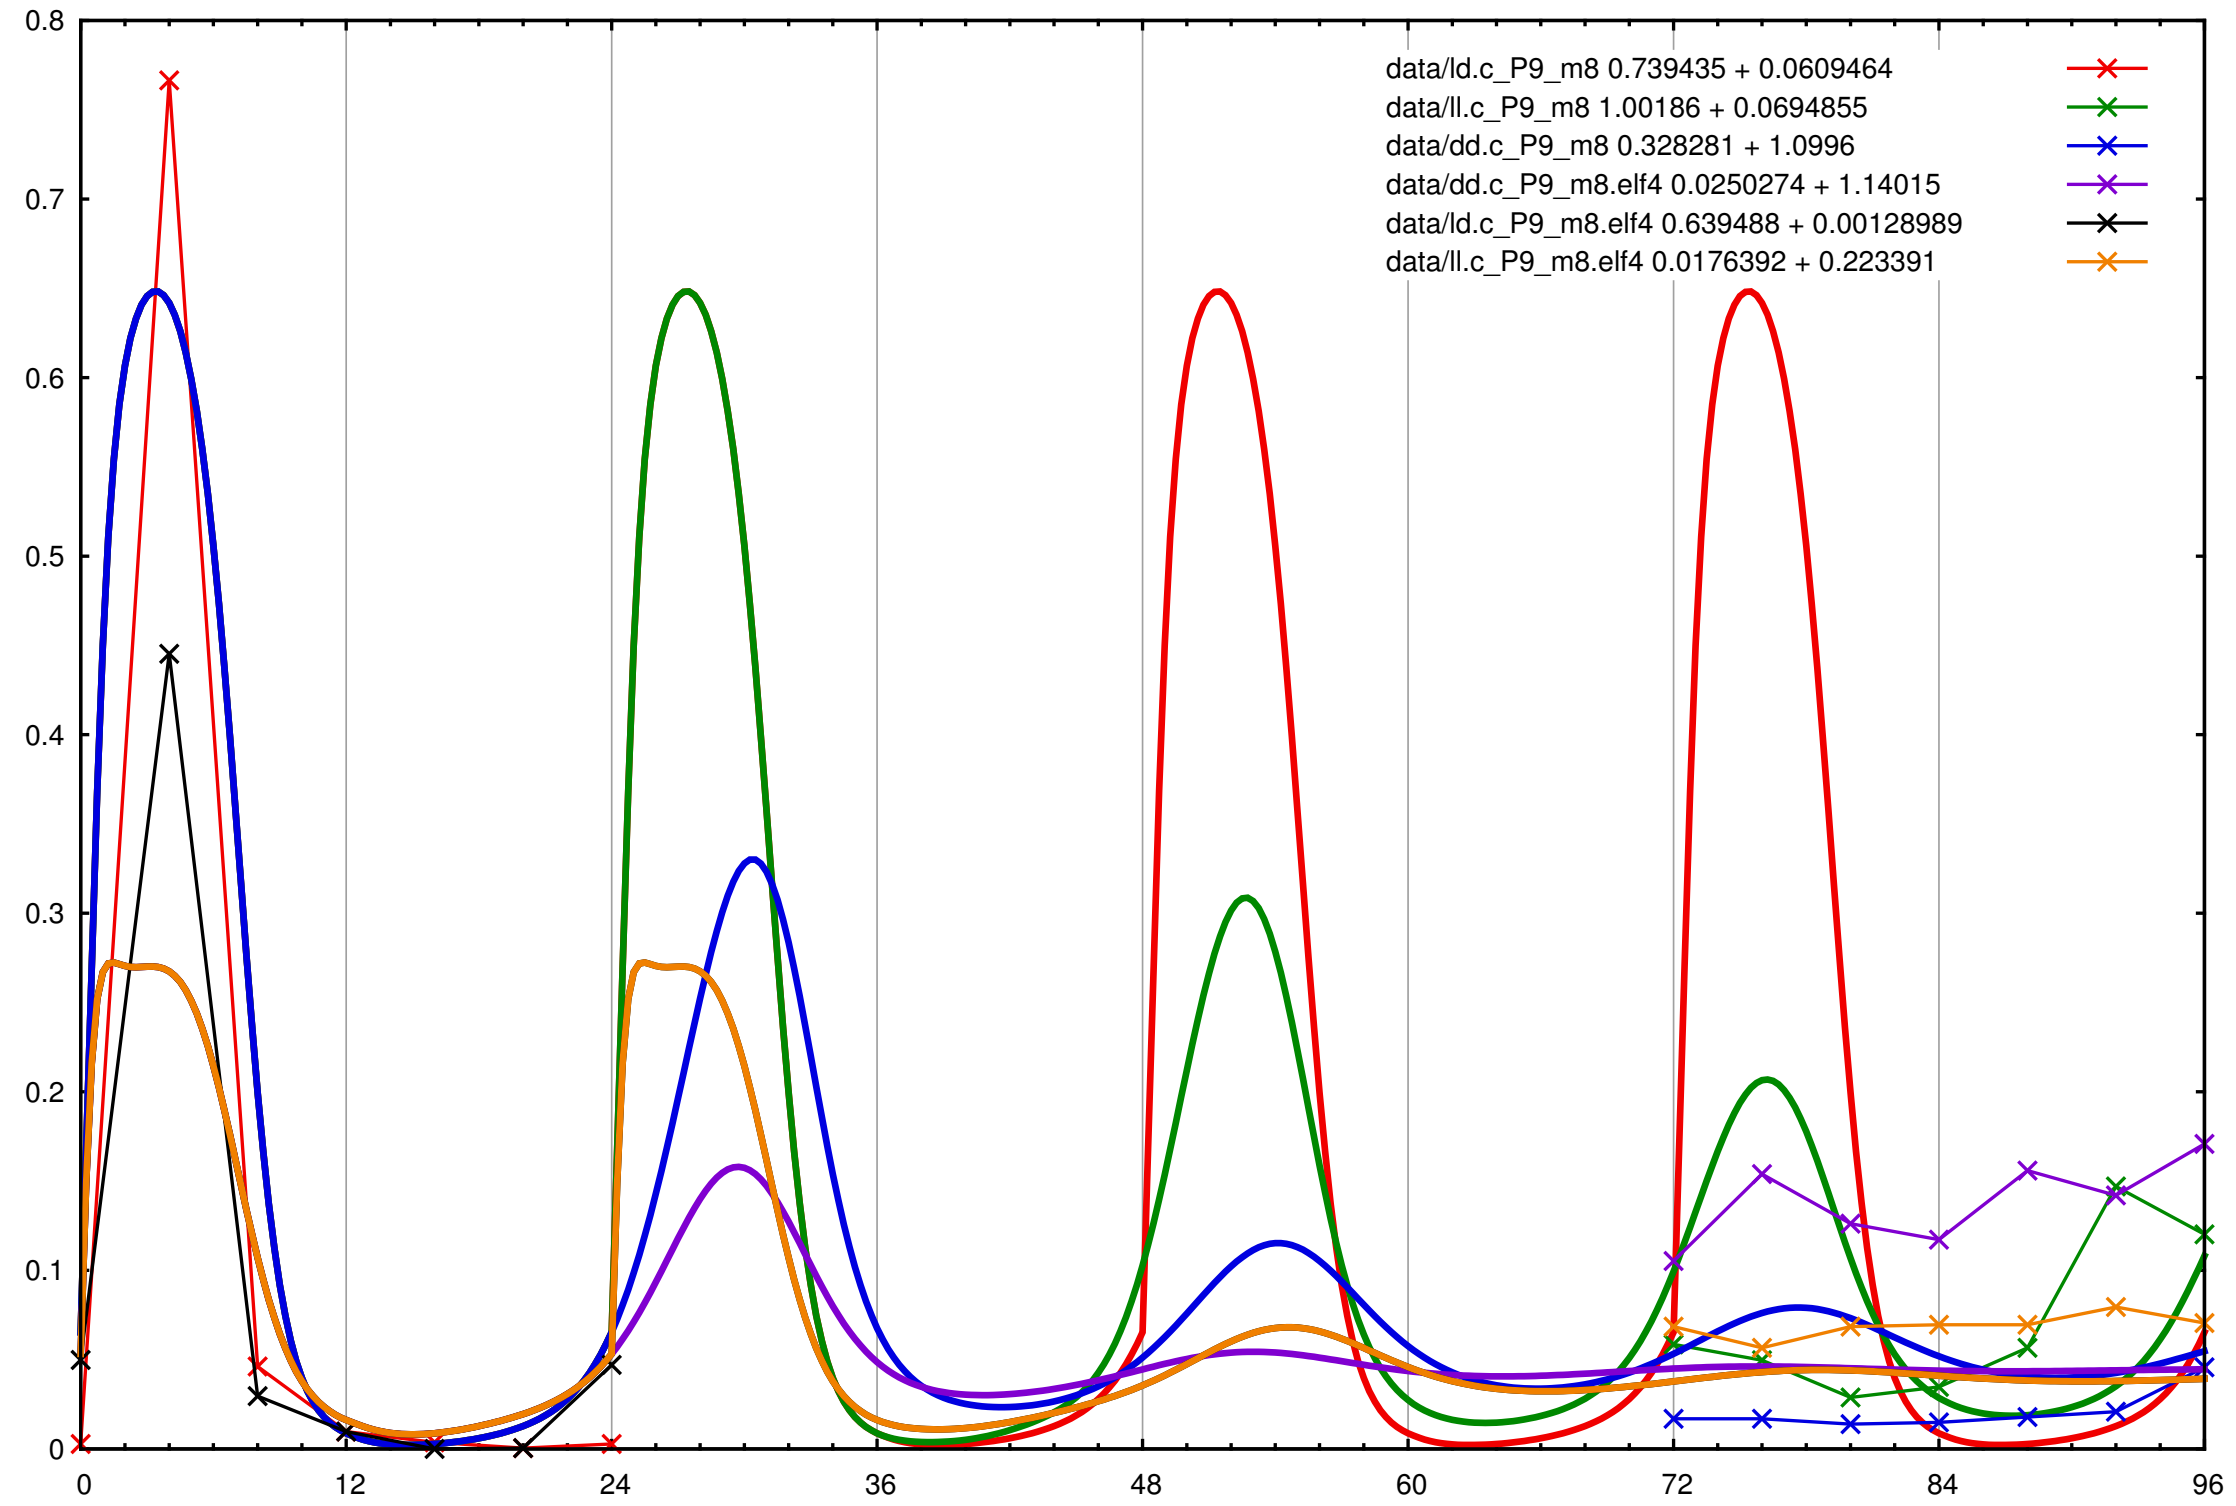

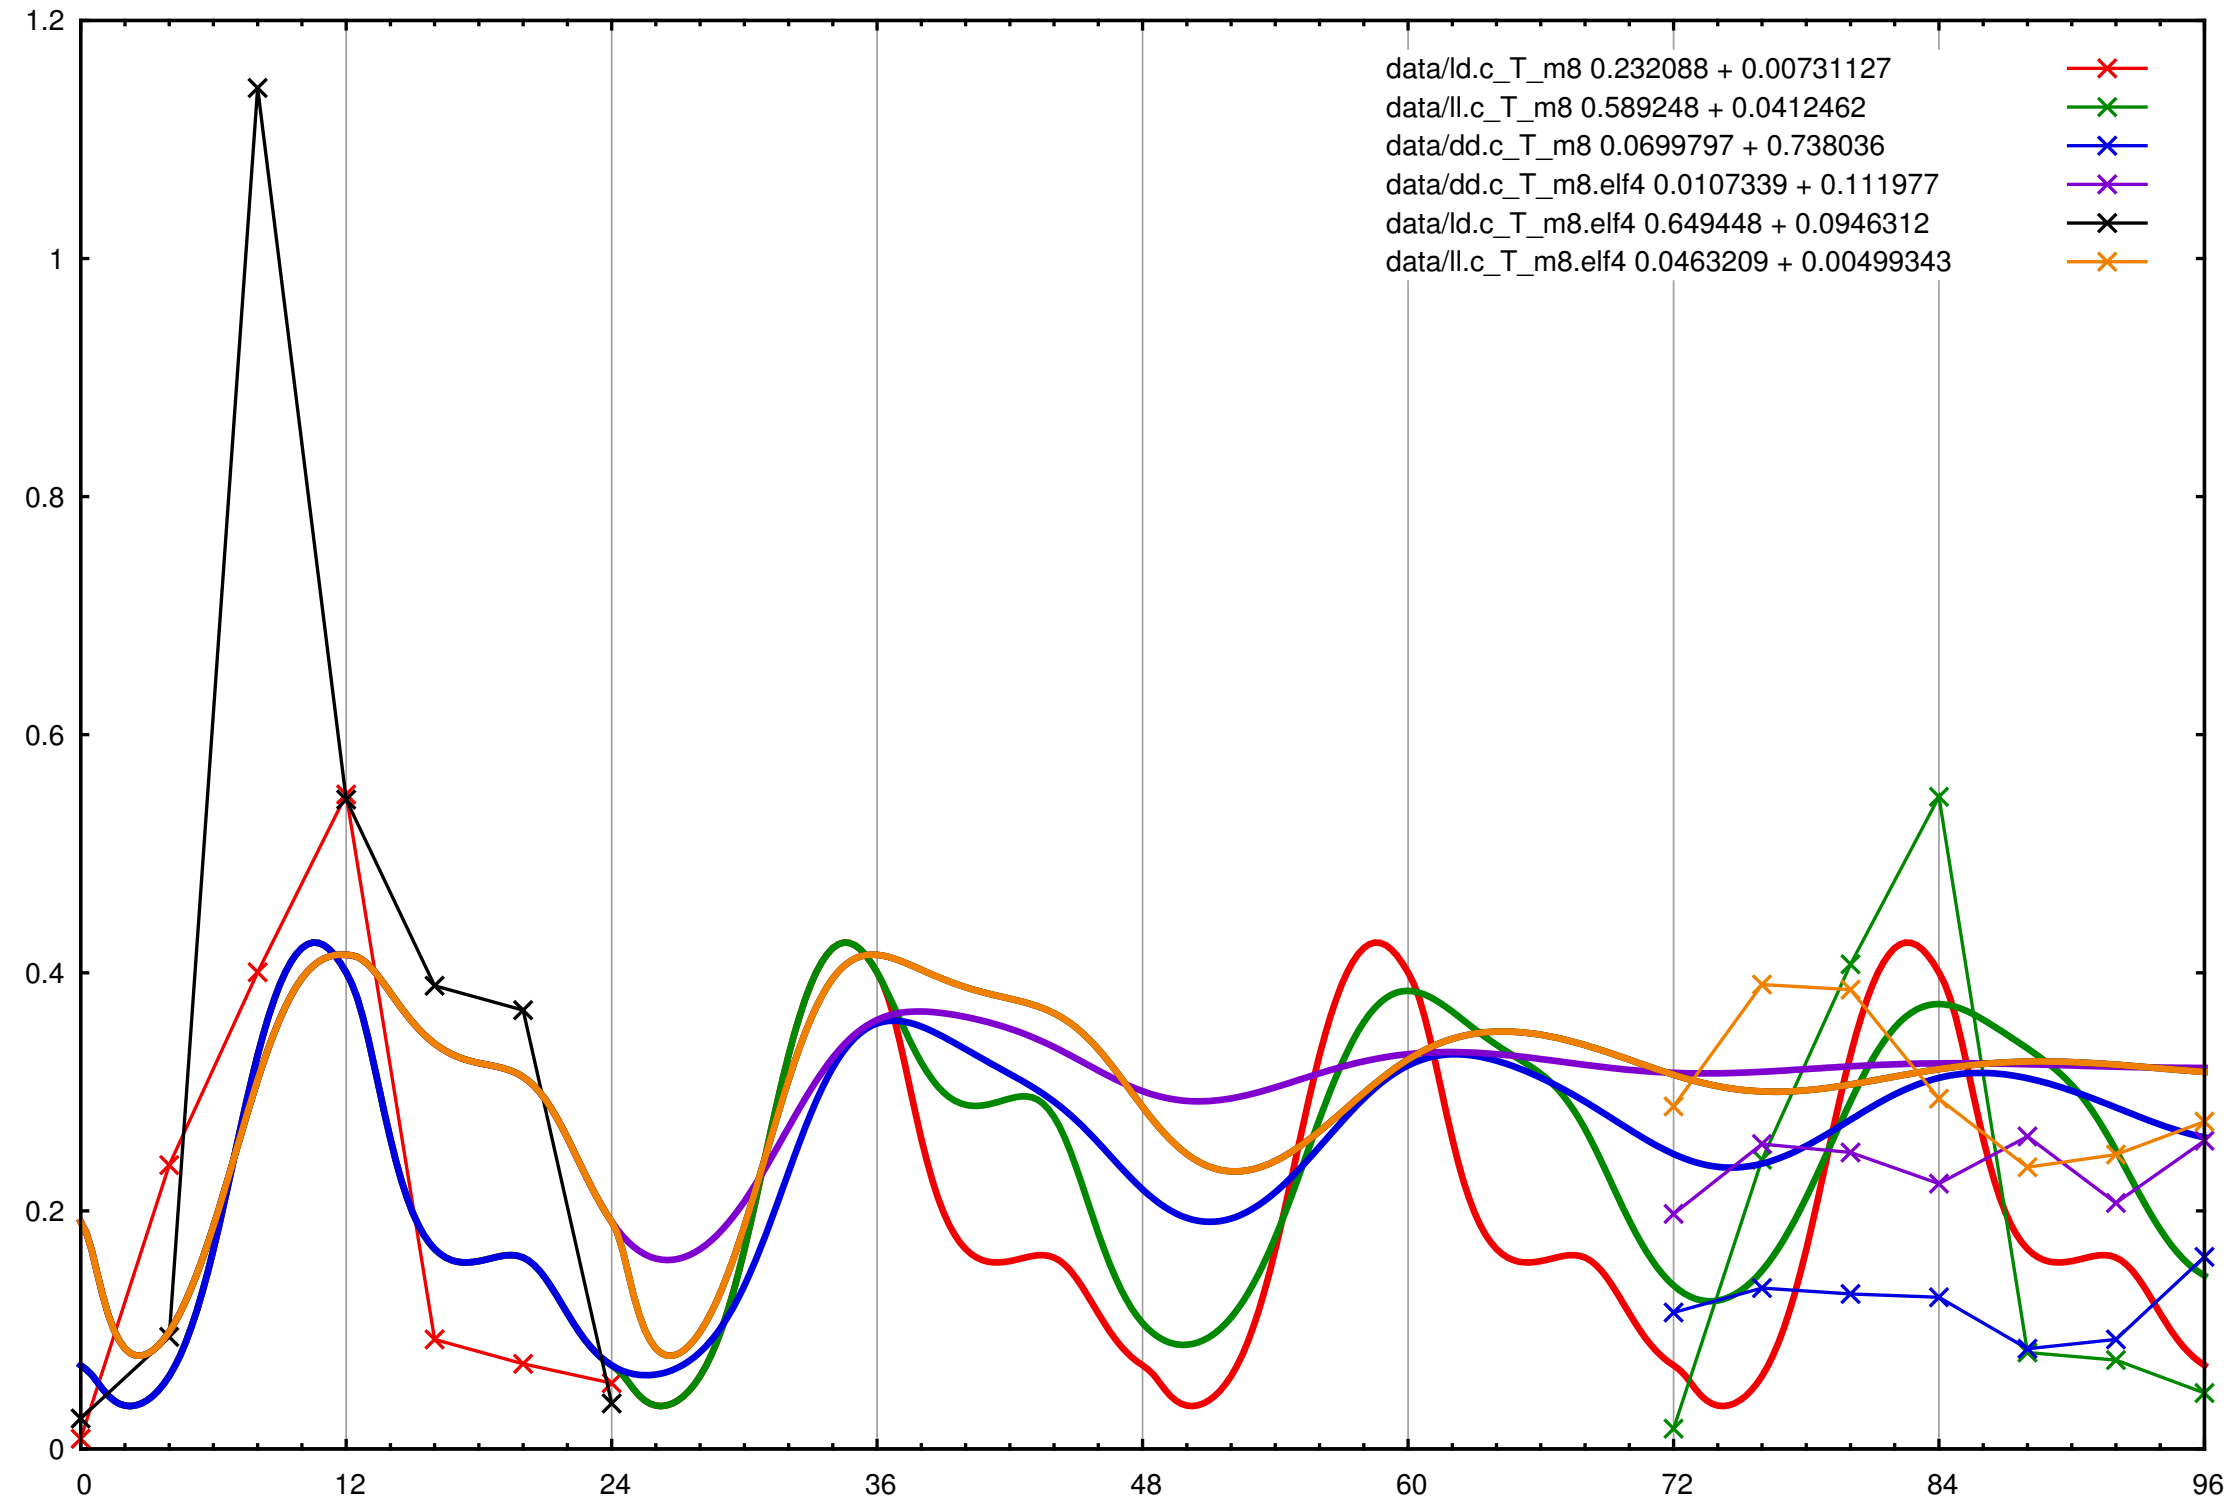

Scale group 60, scost 0.00925749

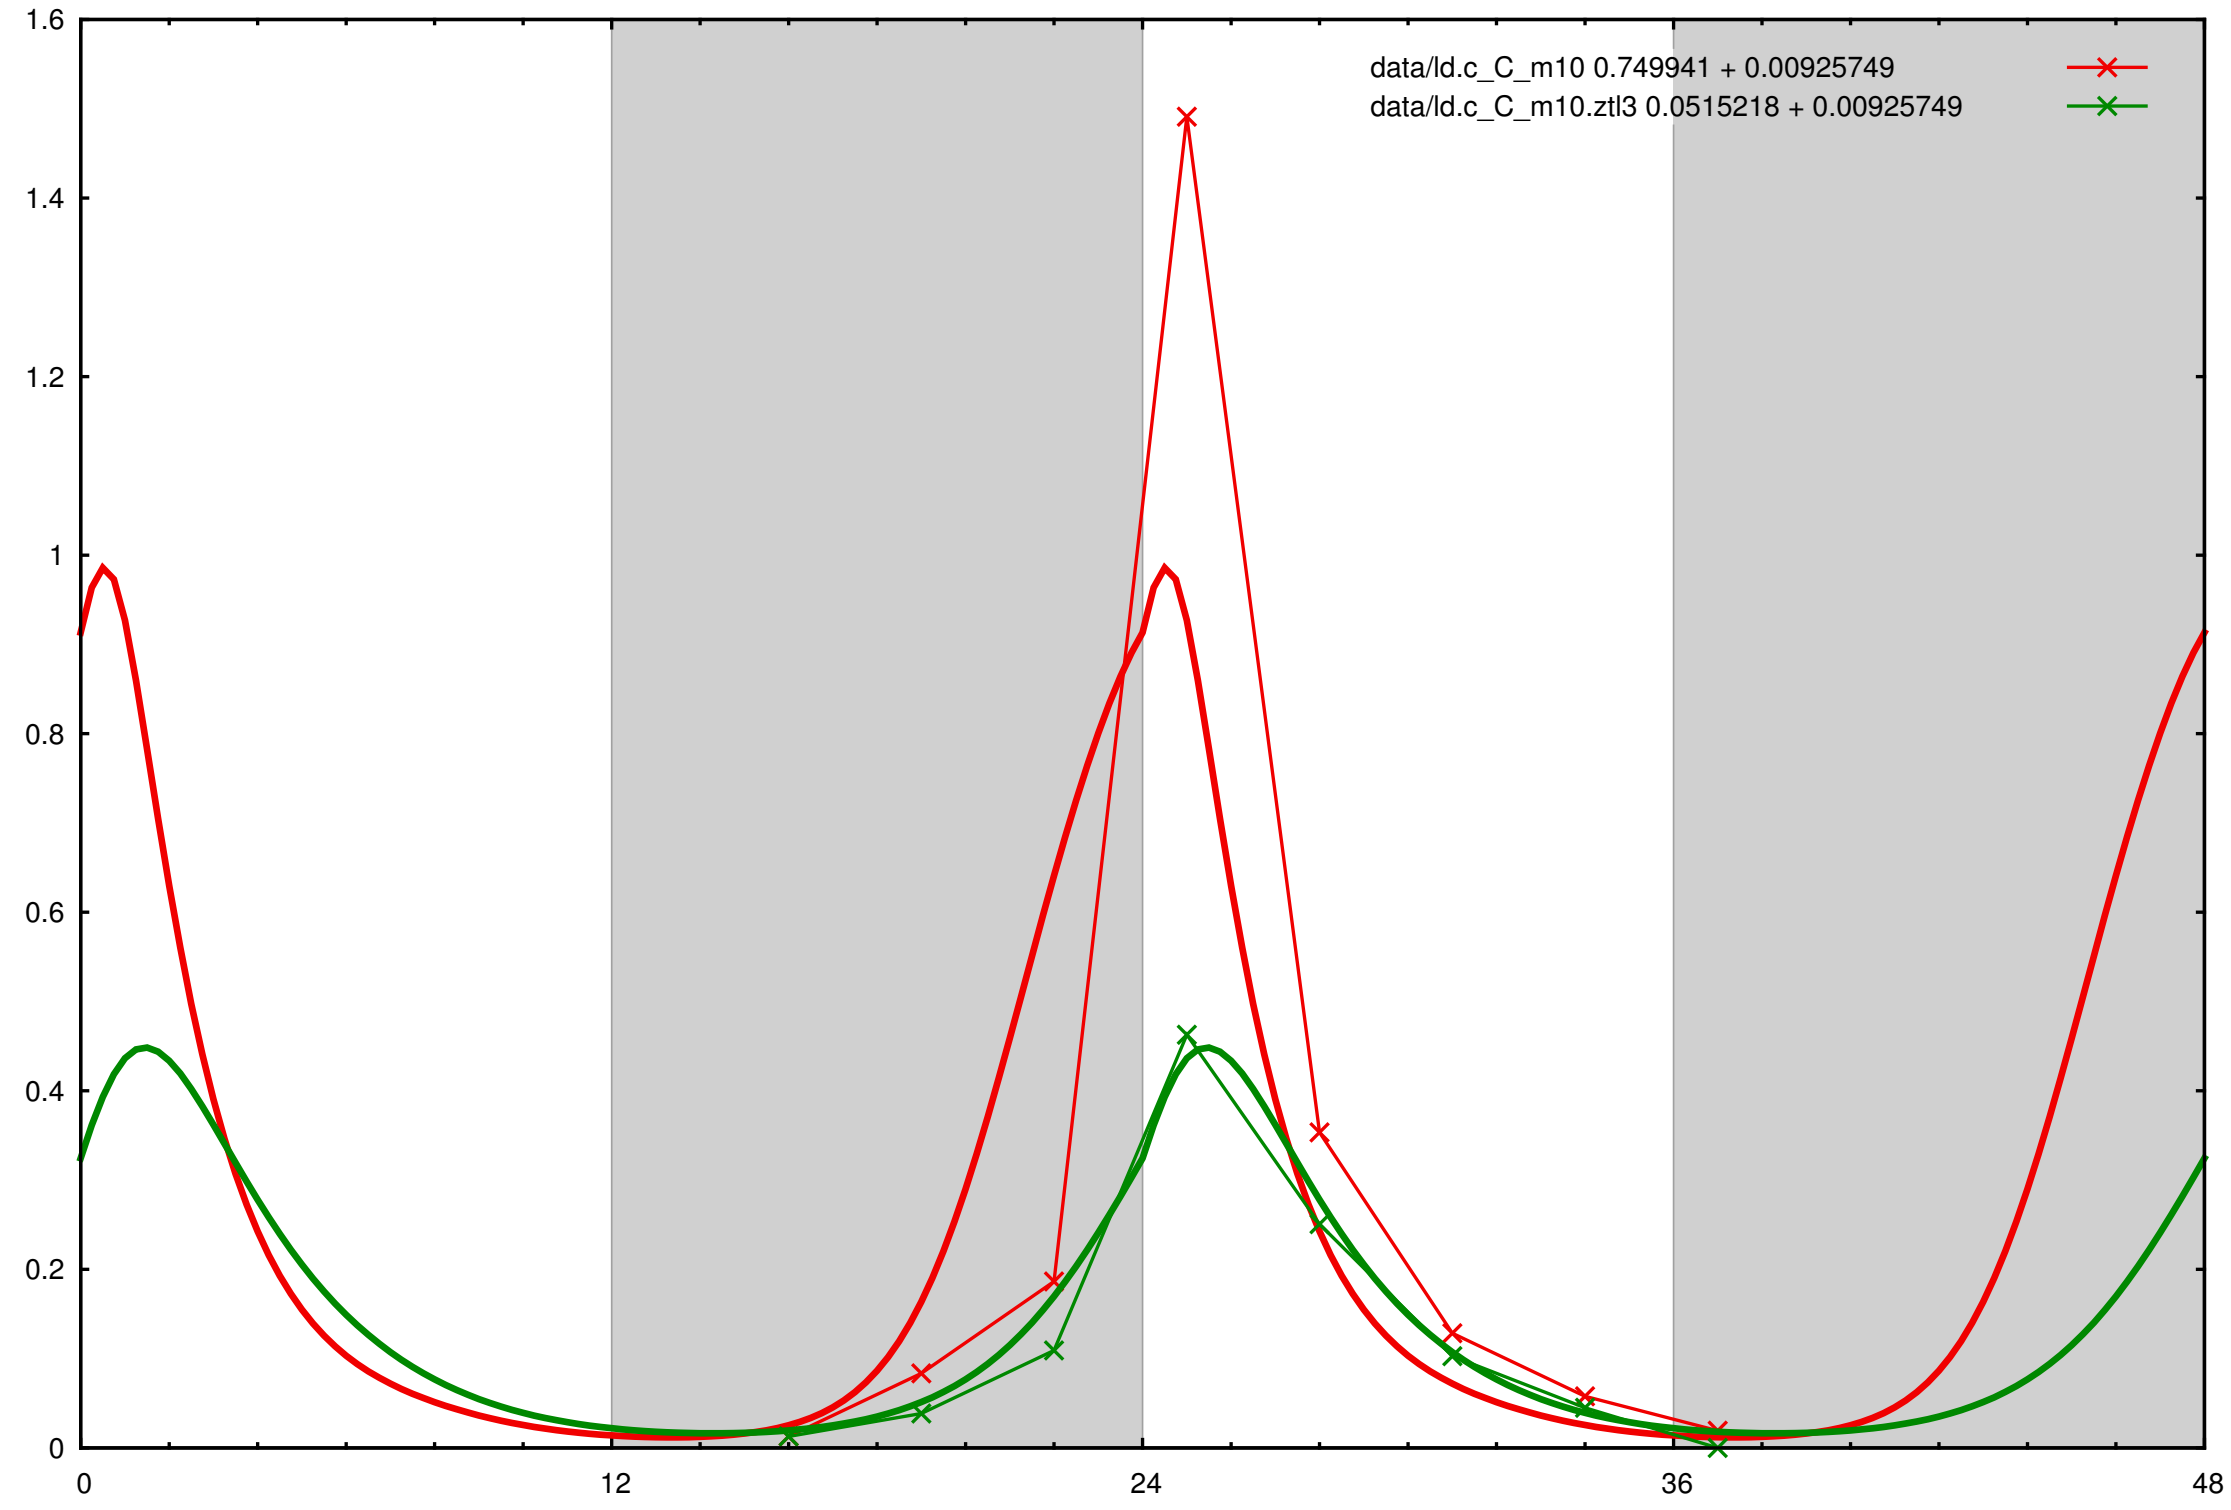

Scale group 61, scost 0.0240633

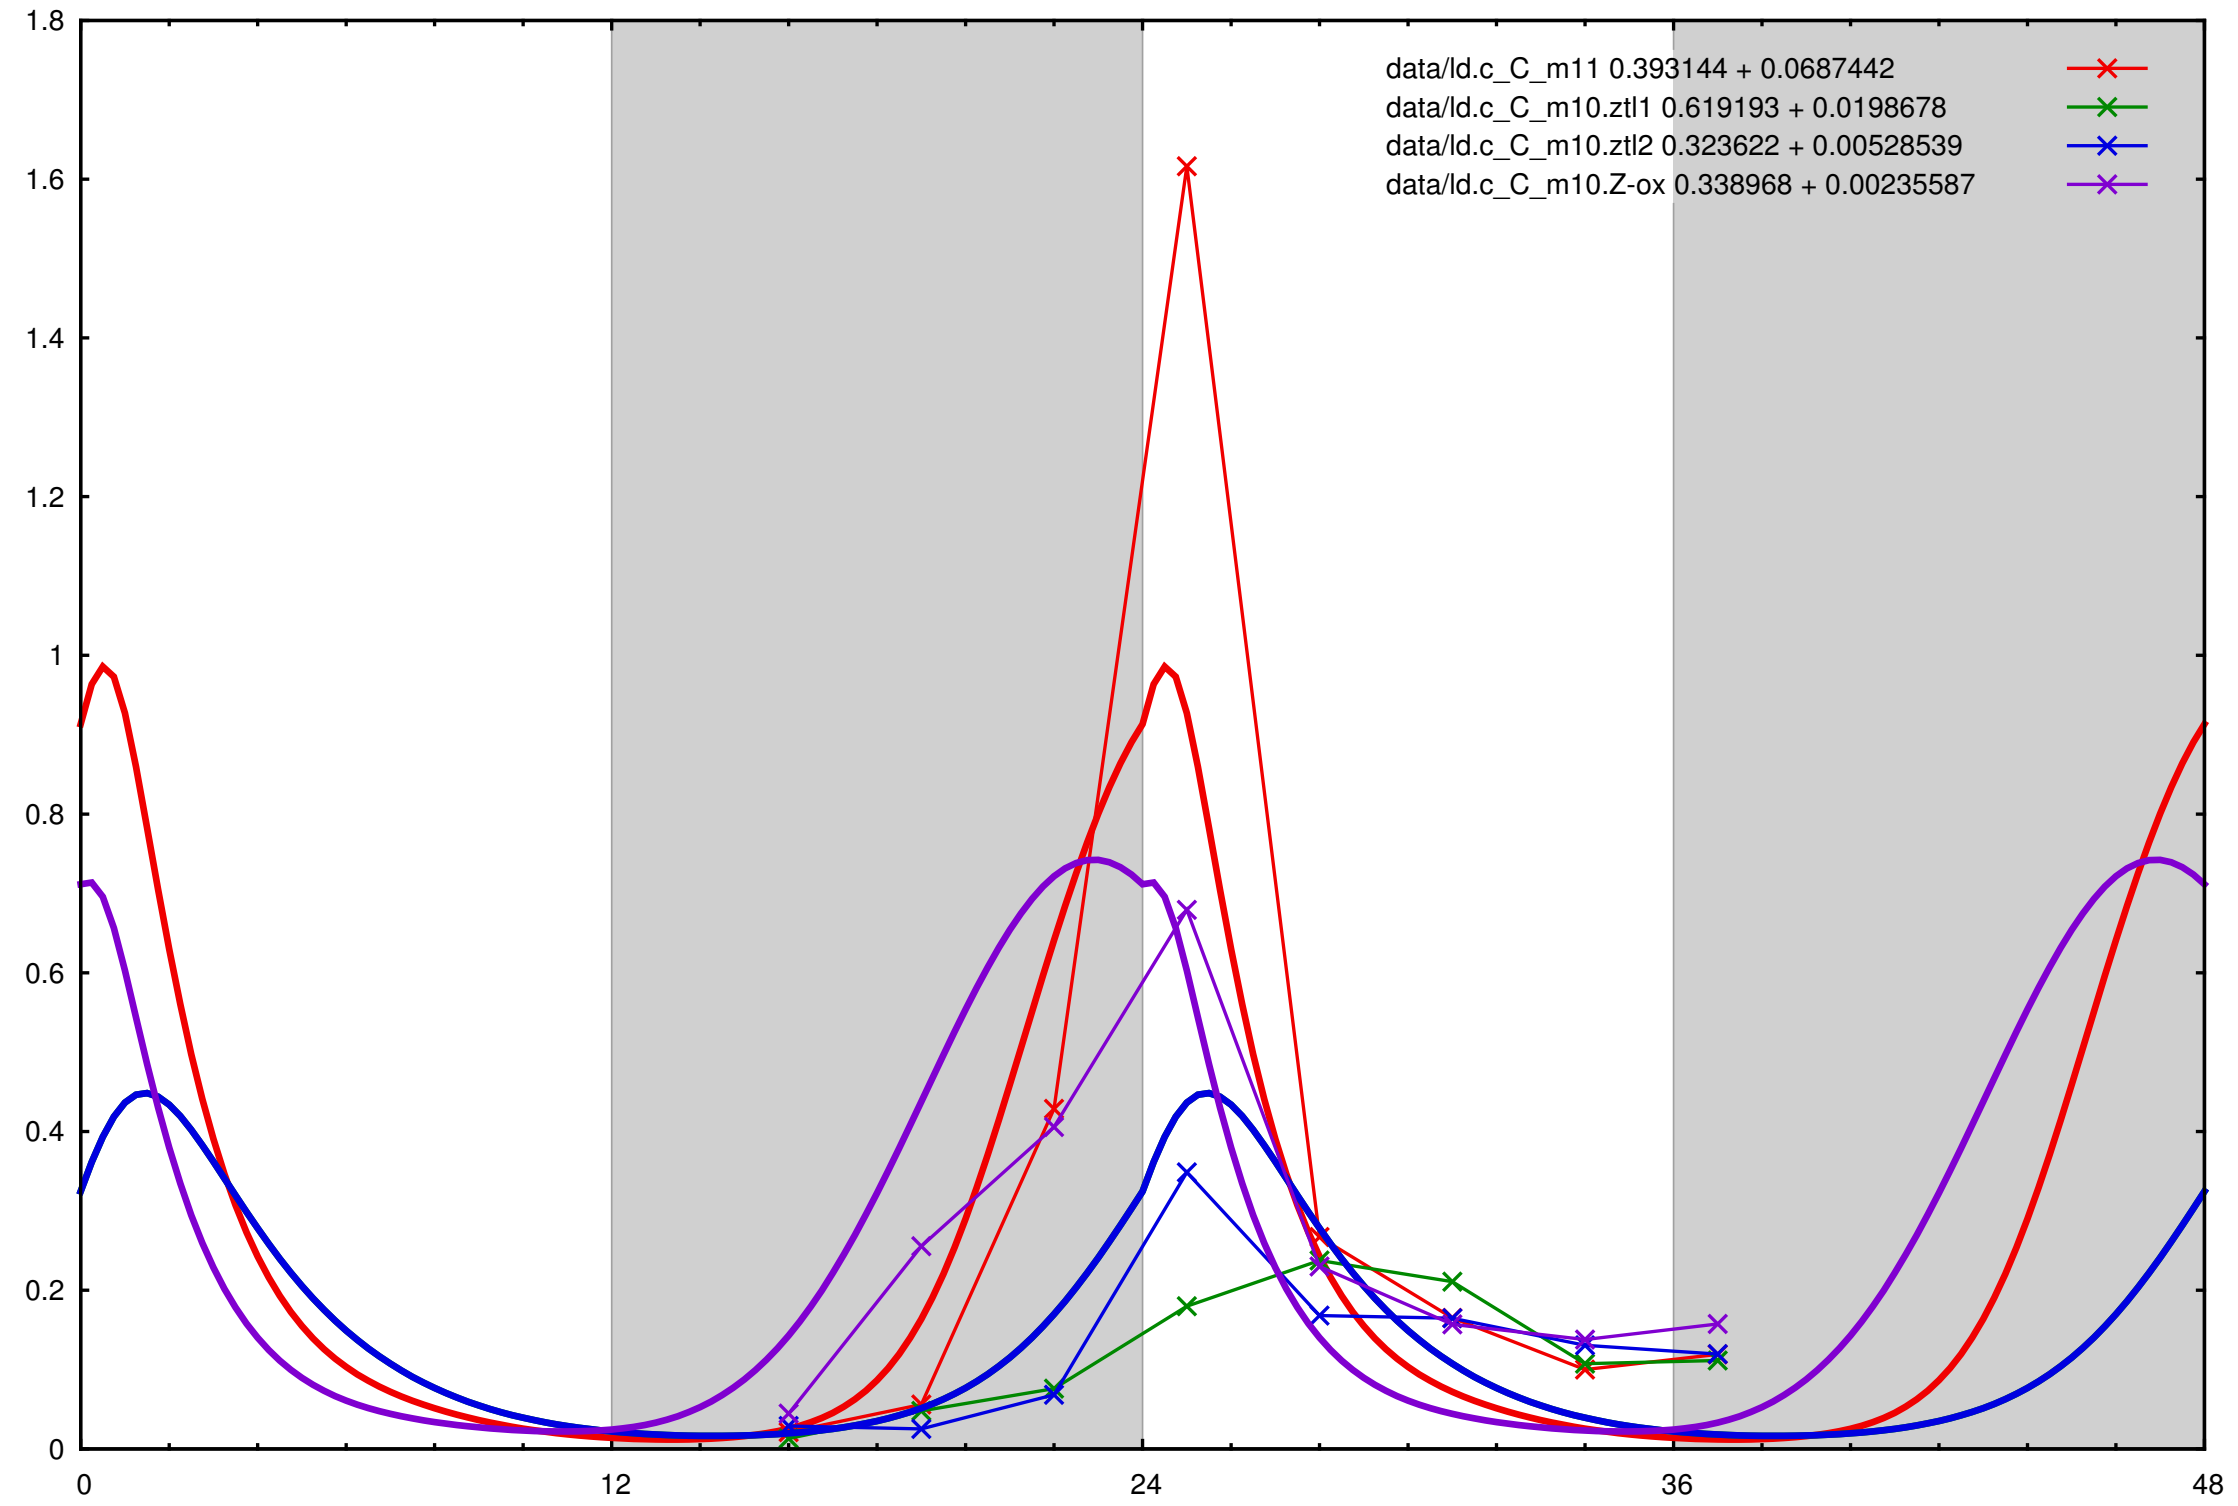

Scale group 62, scost 0.00229461

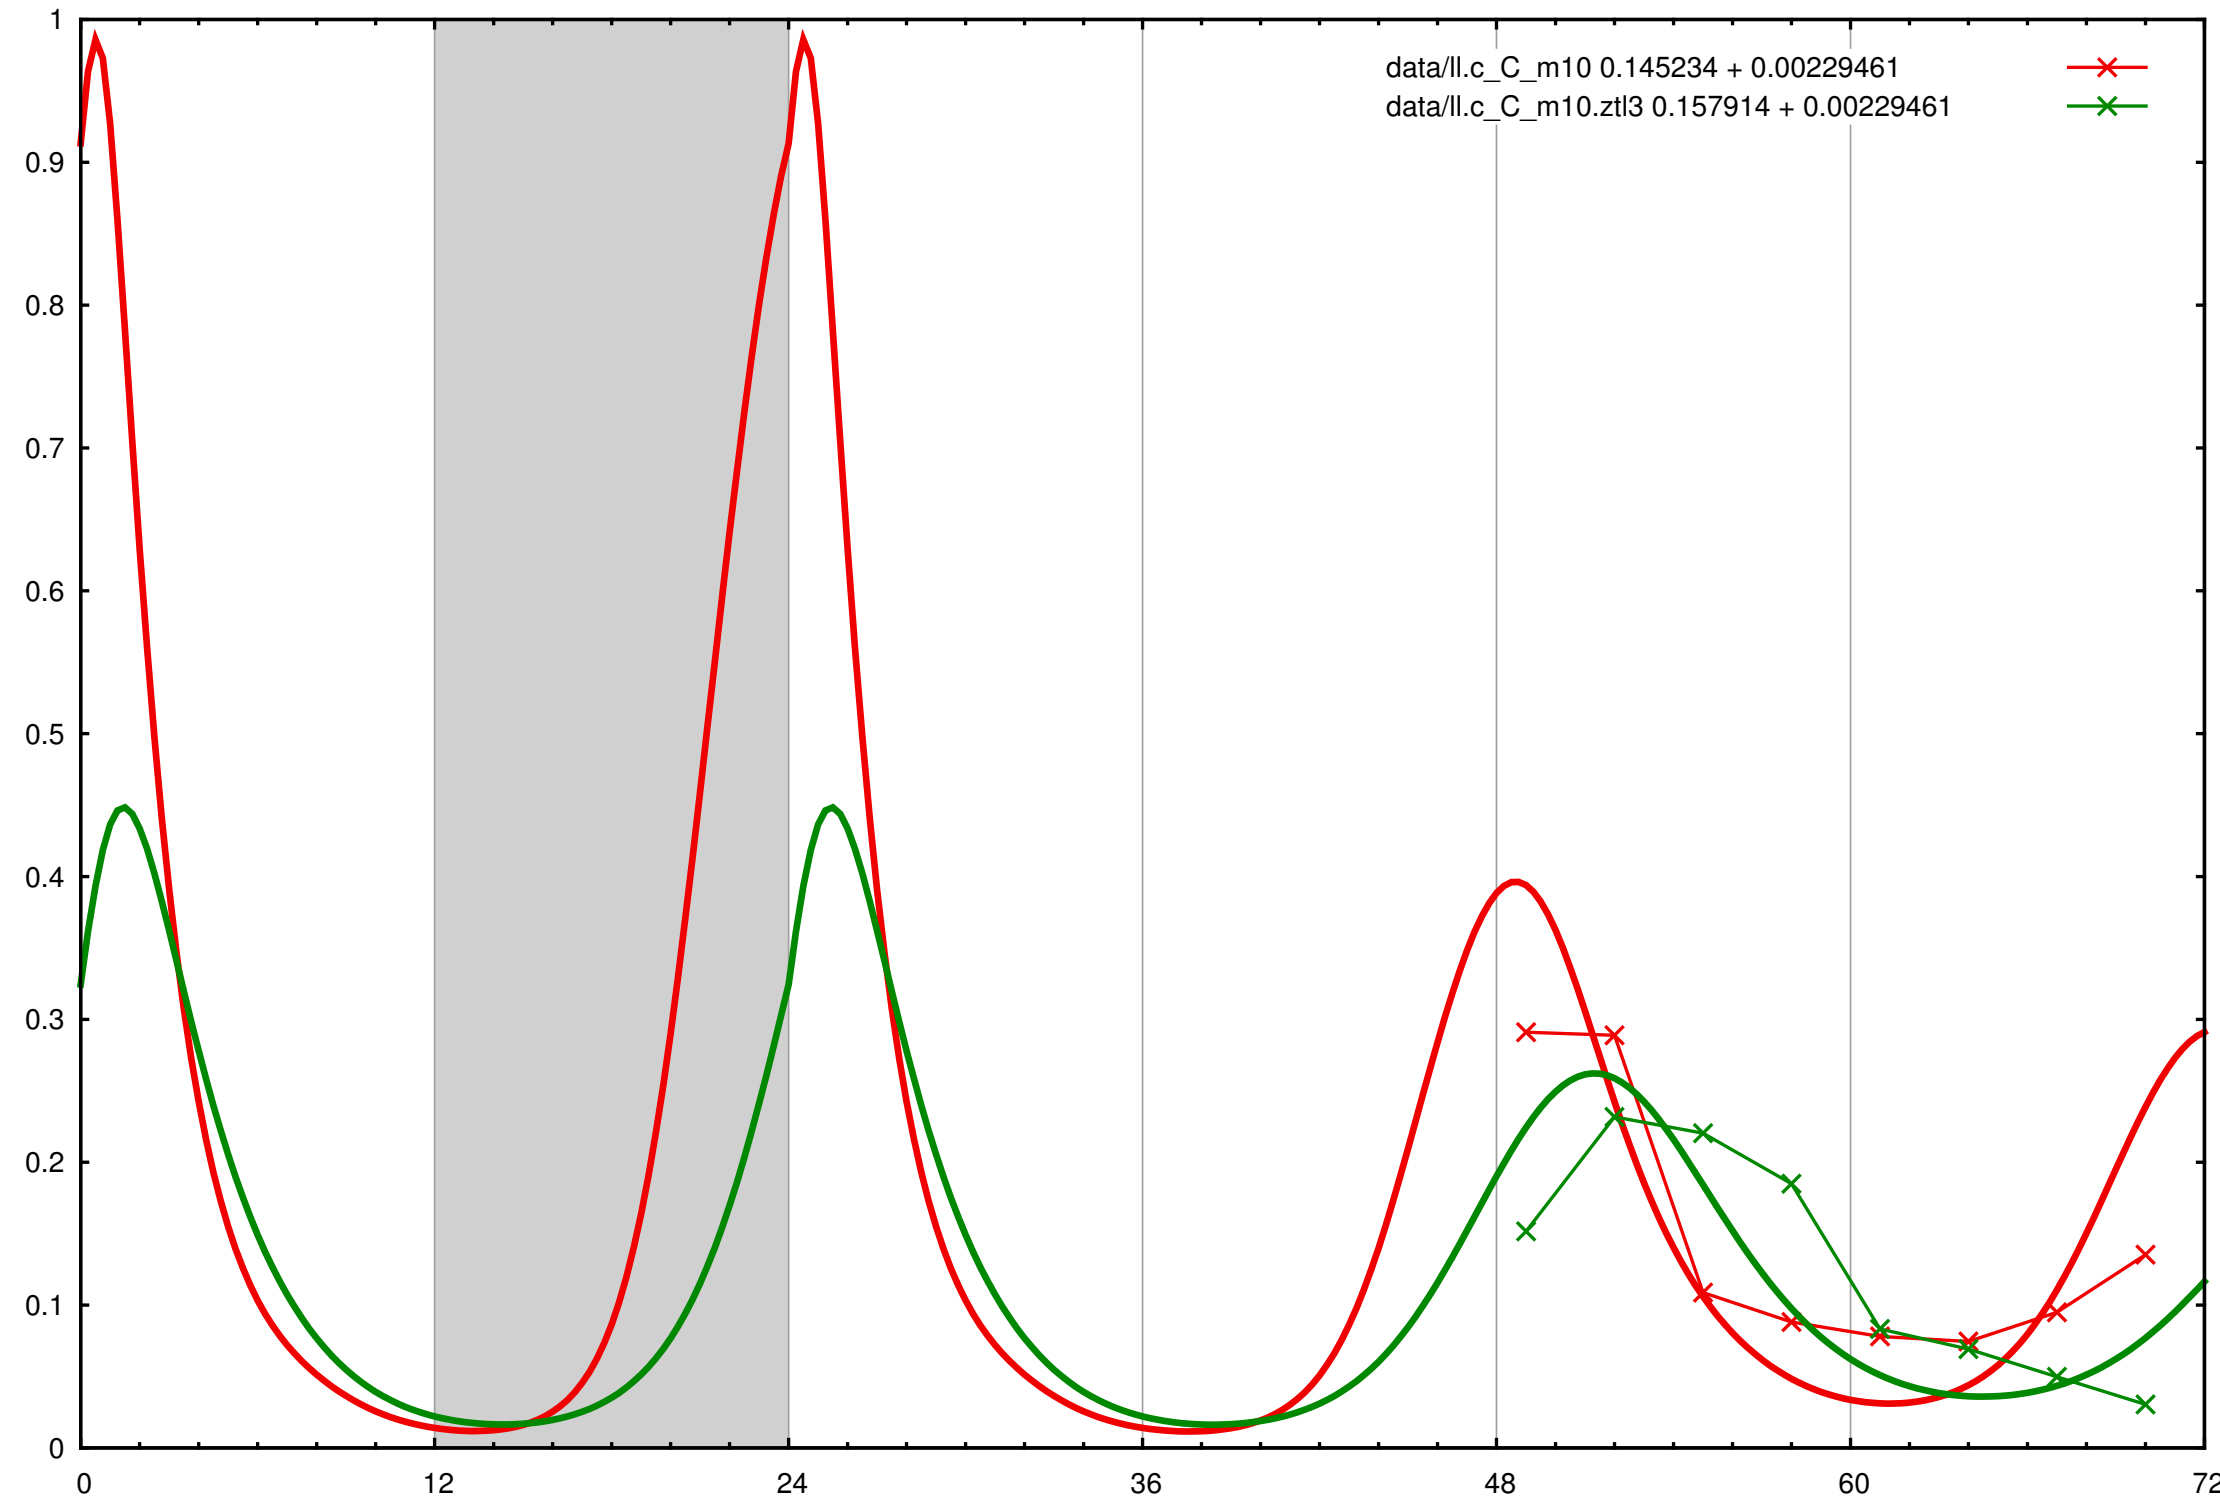

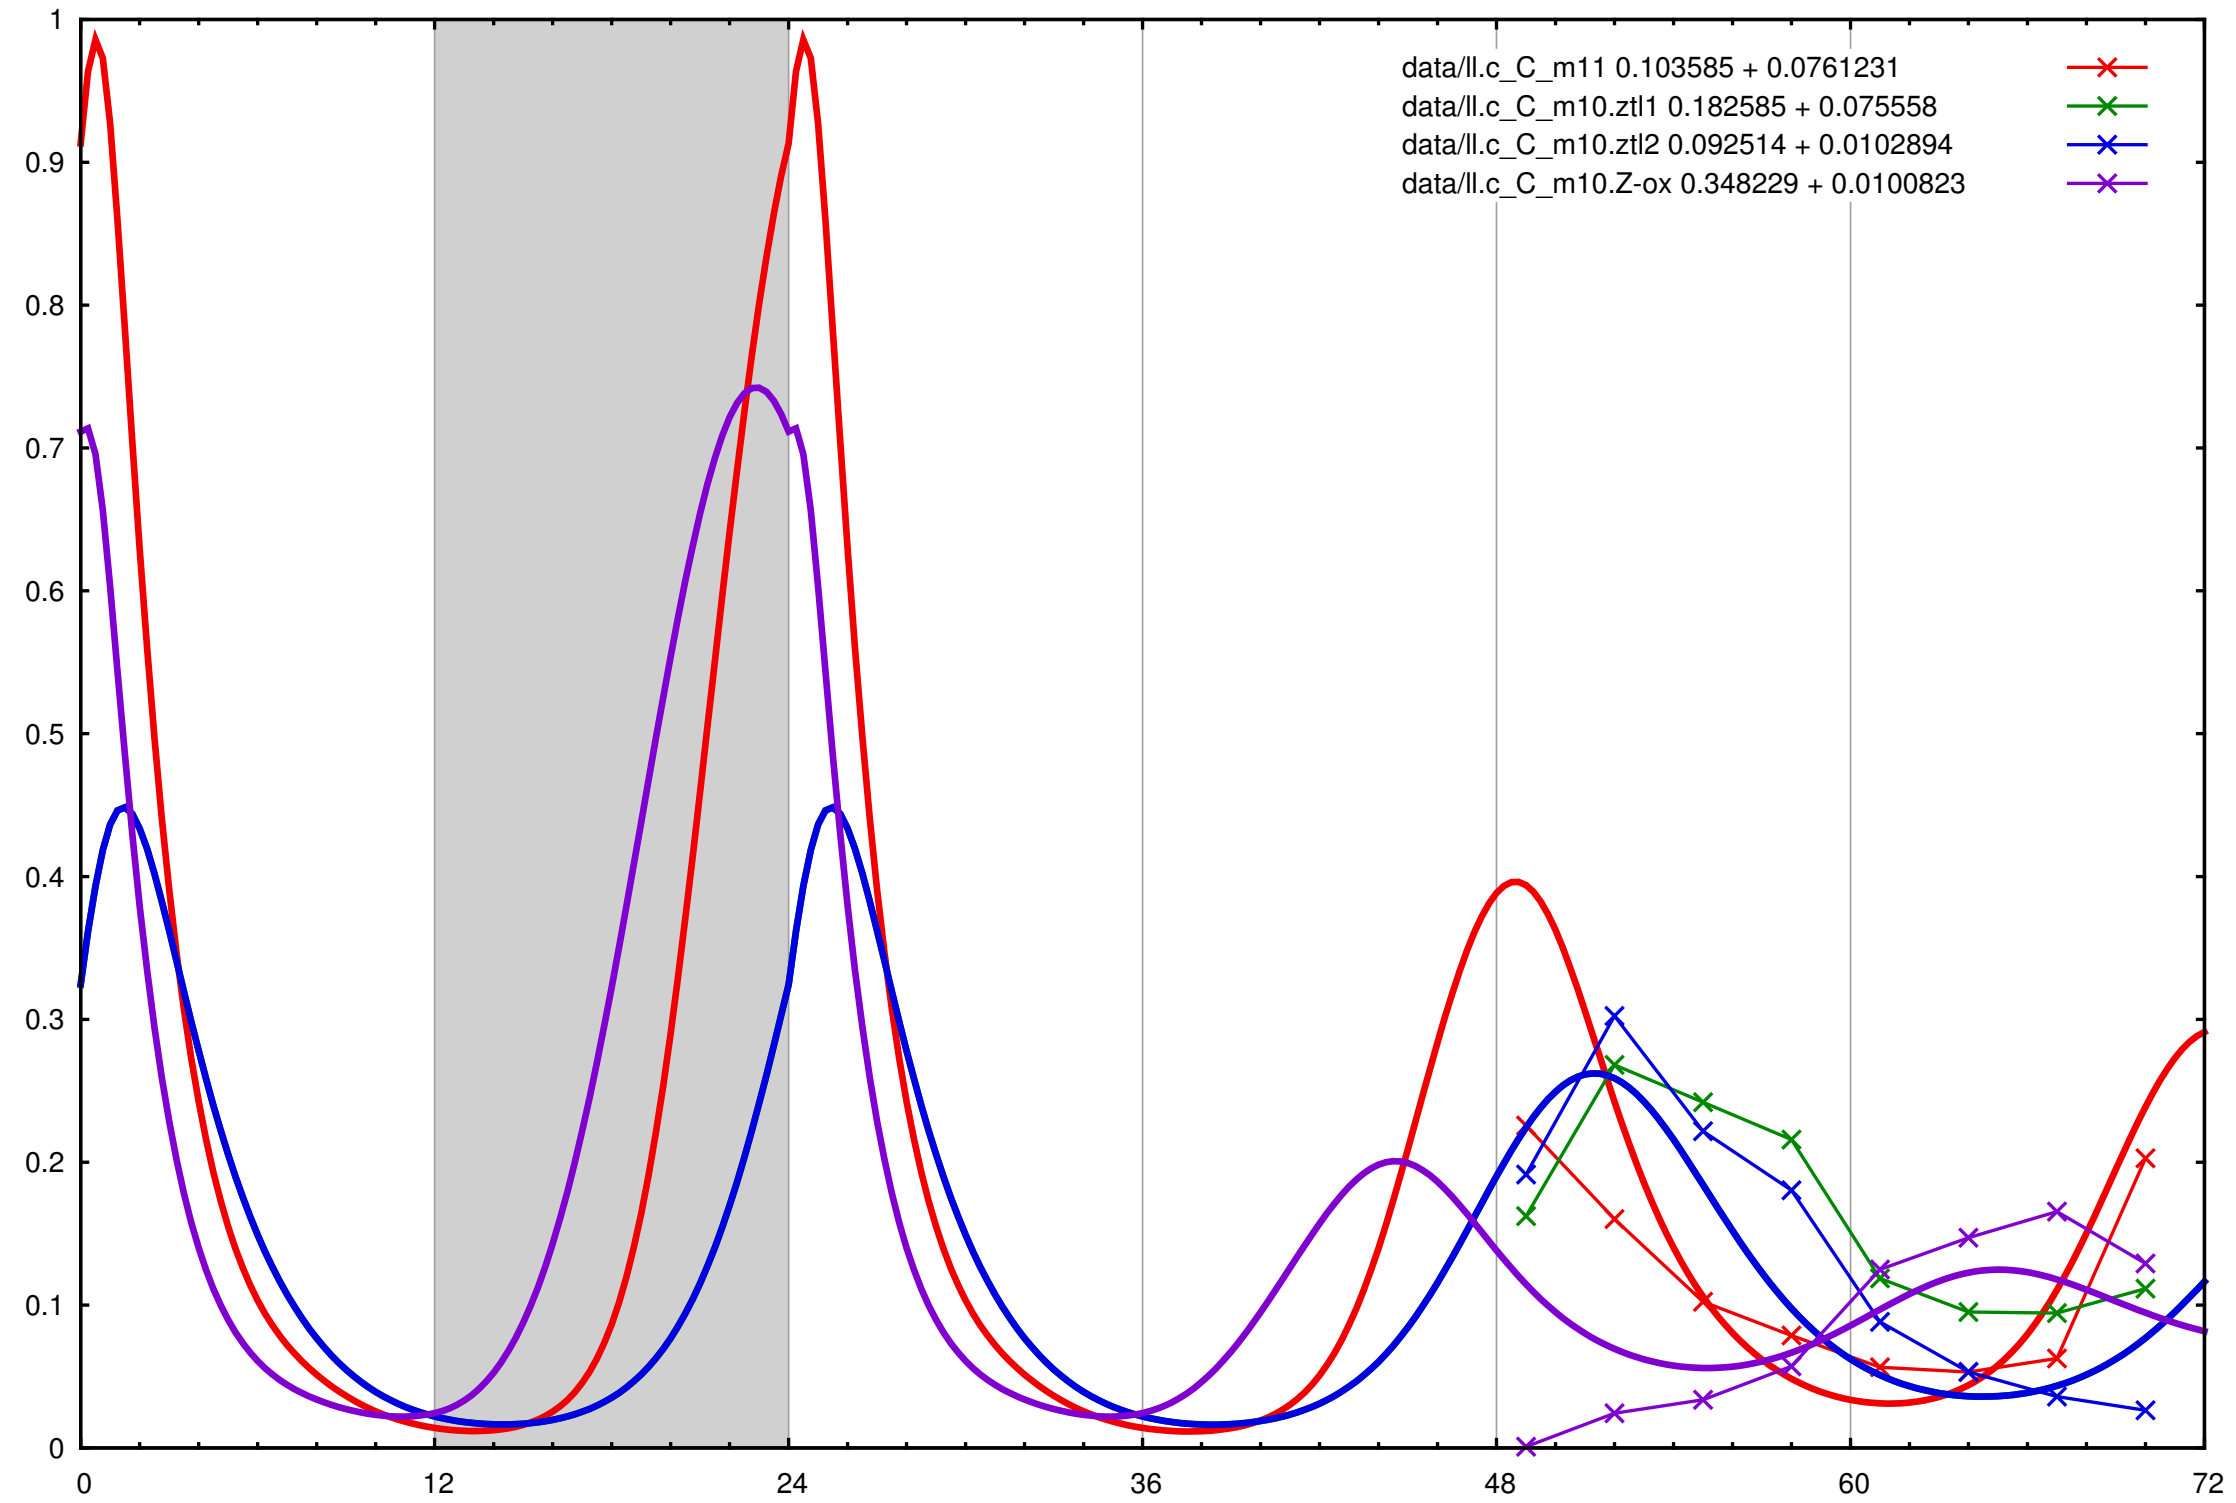

Scale group 64, scost 0.000563097

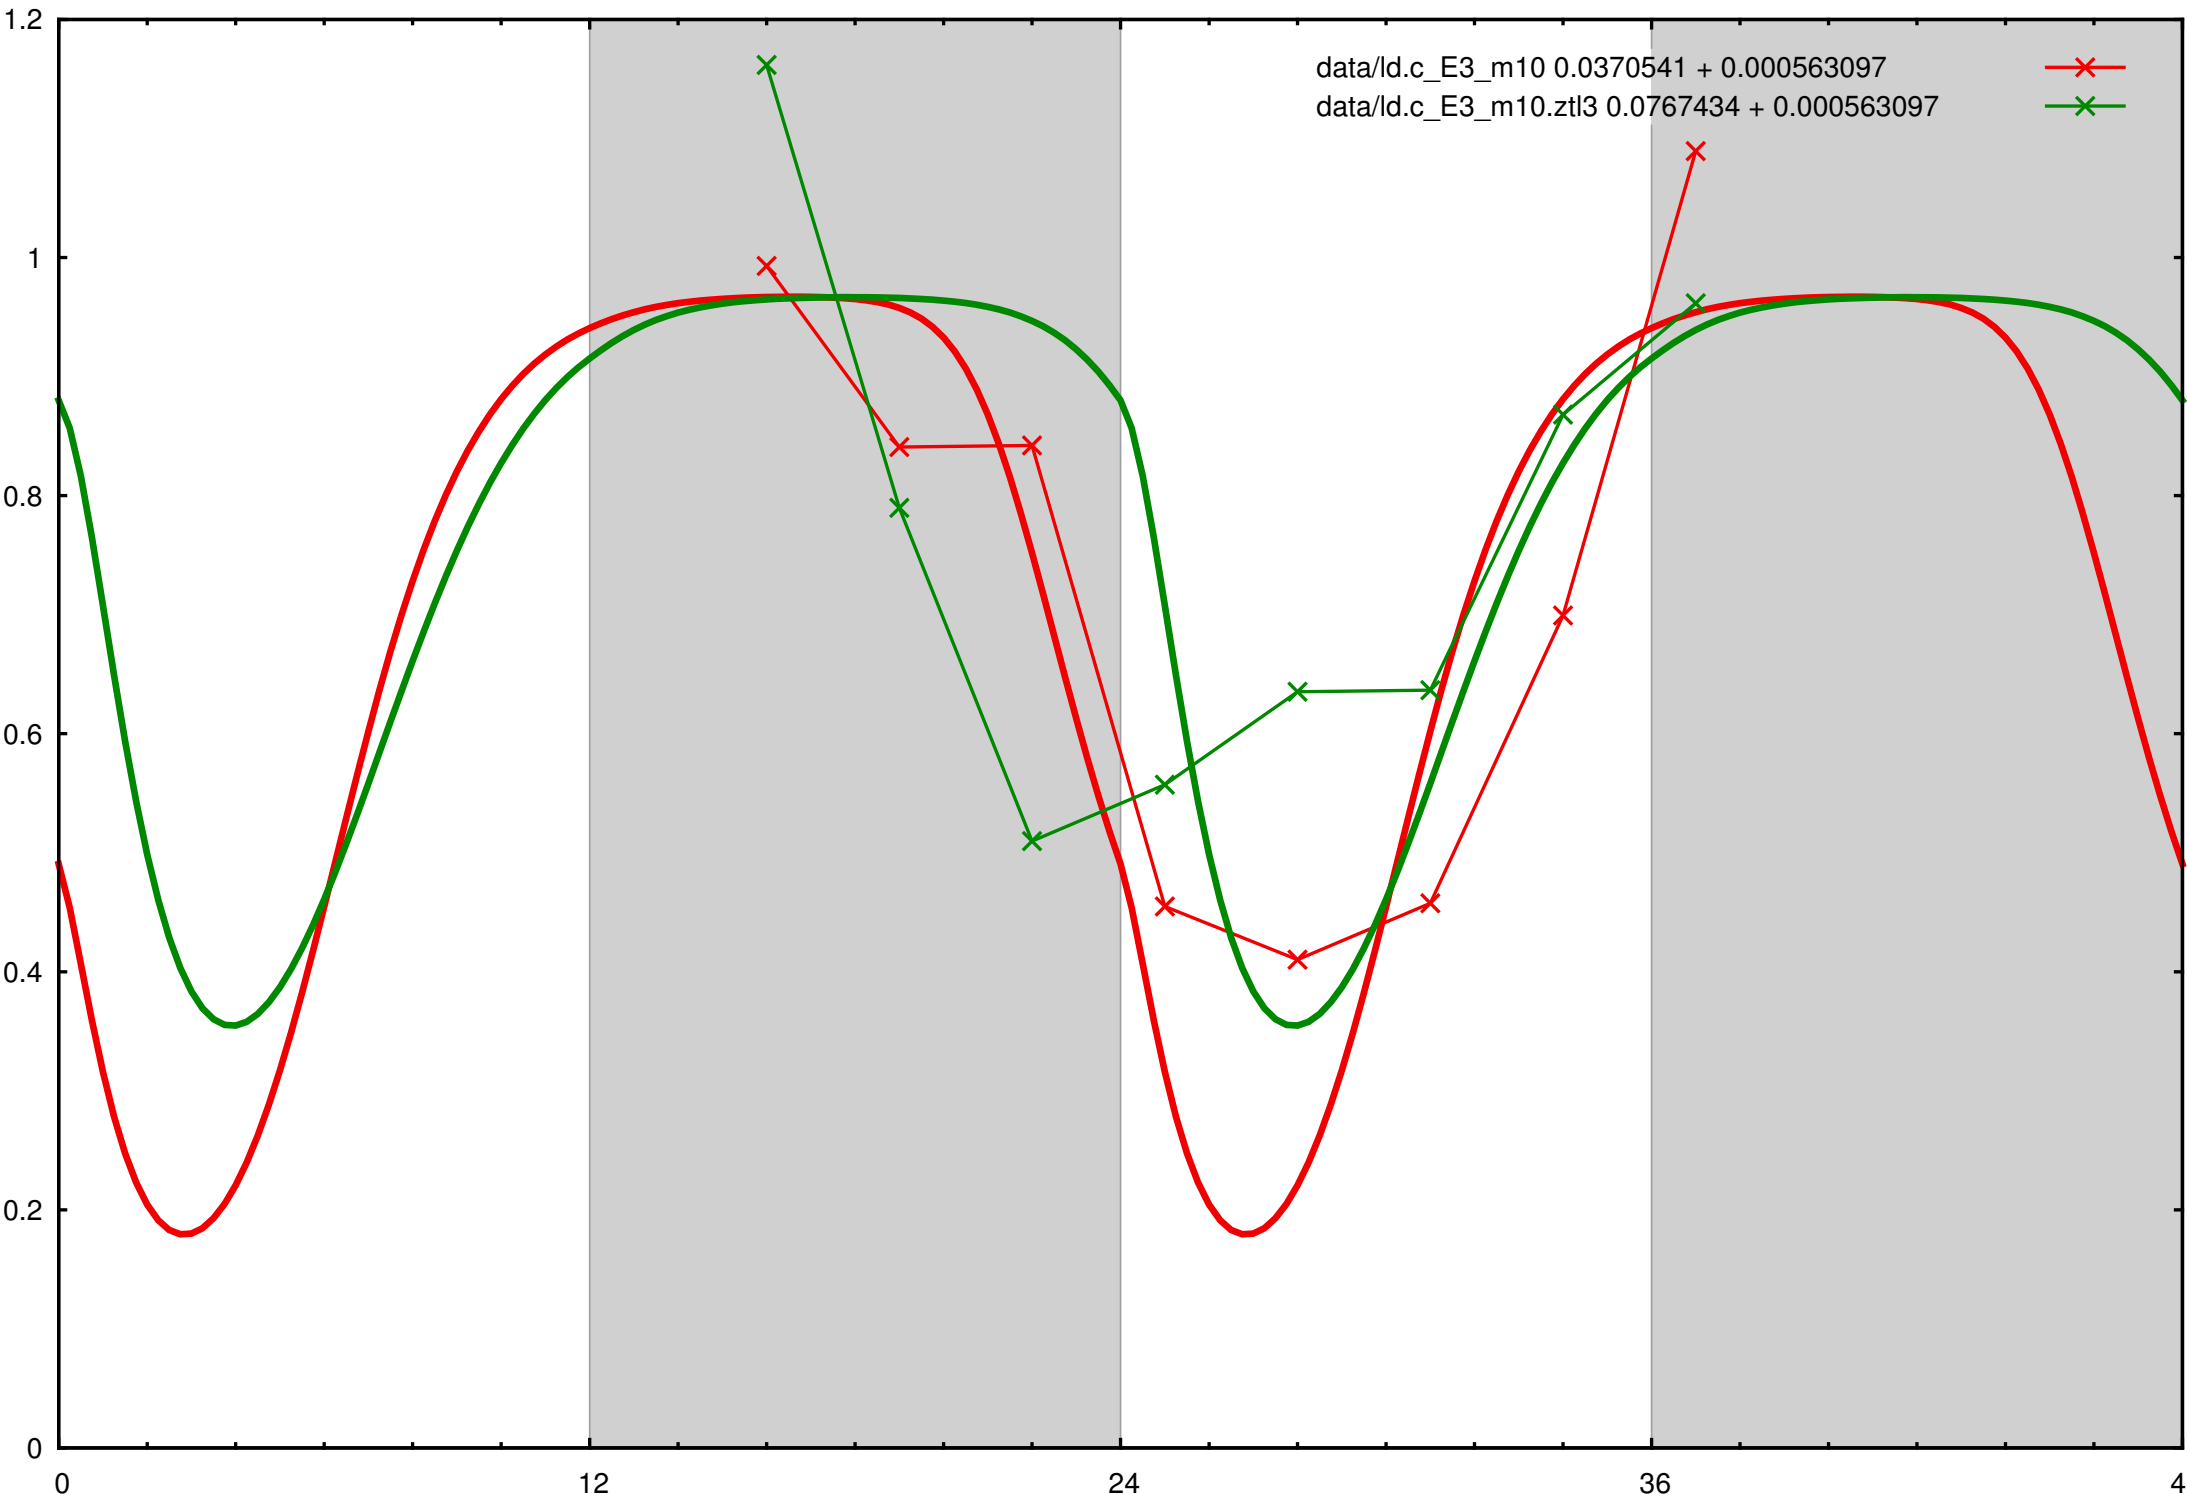



Scale group 65, scost 0.0821636

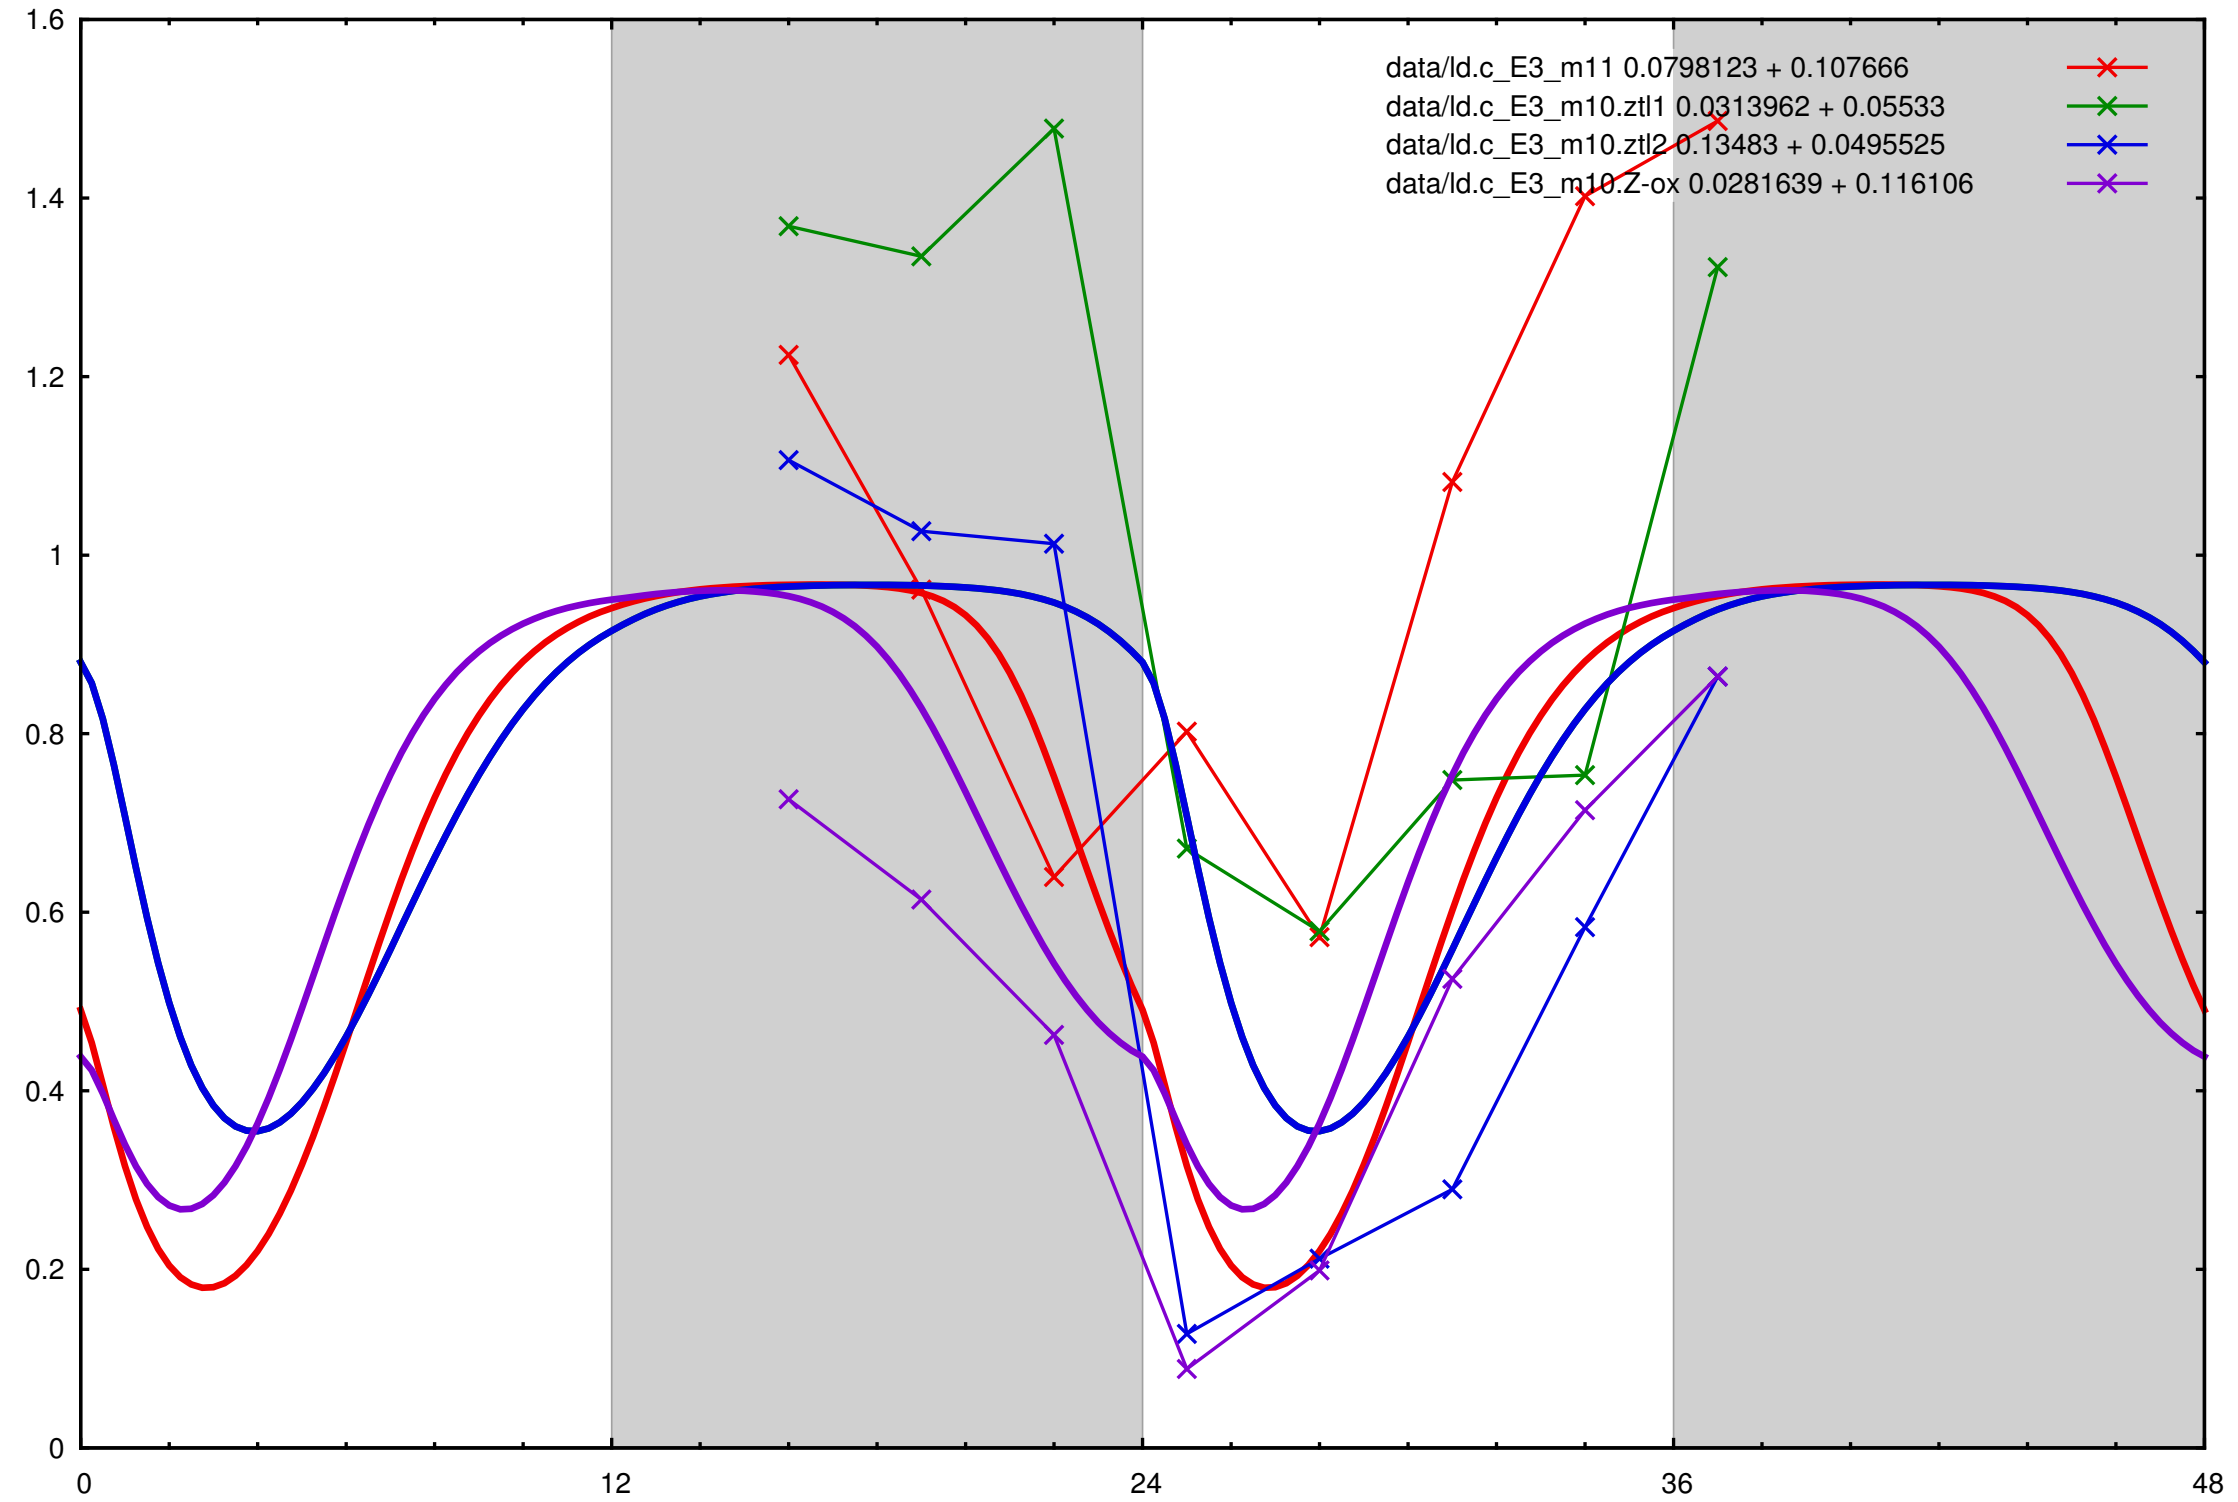

Scale group 66, scost 0.00162102

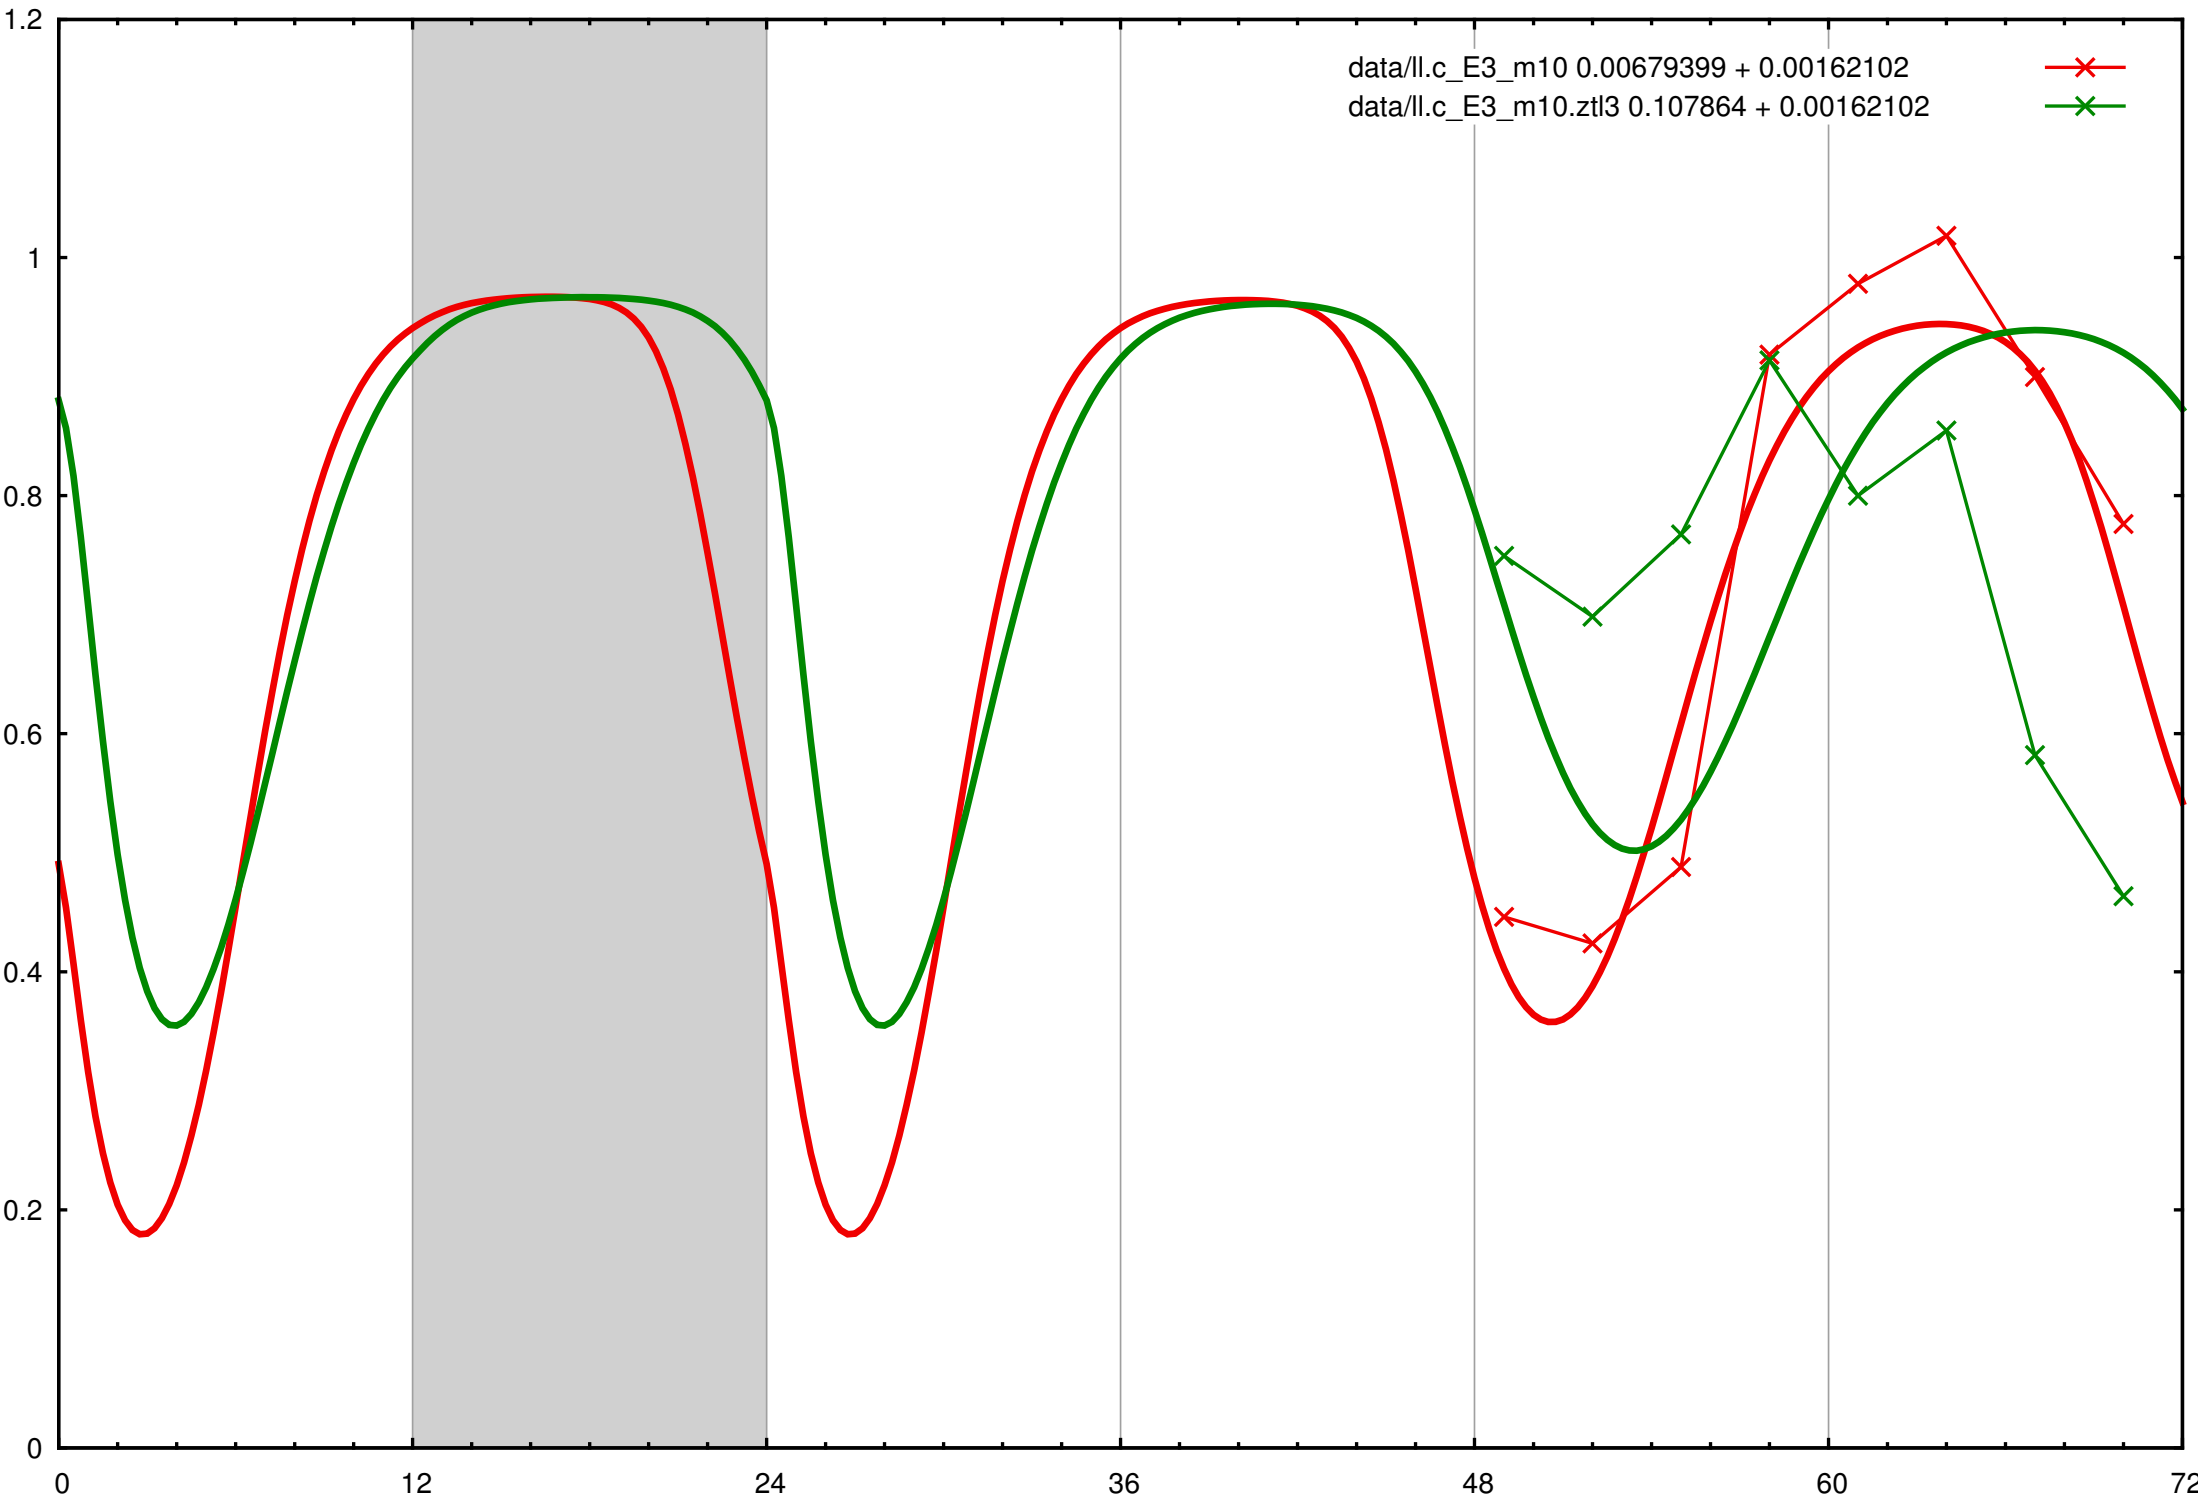

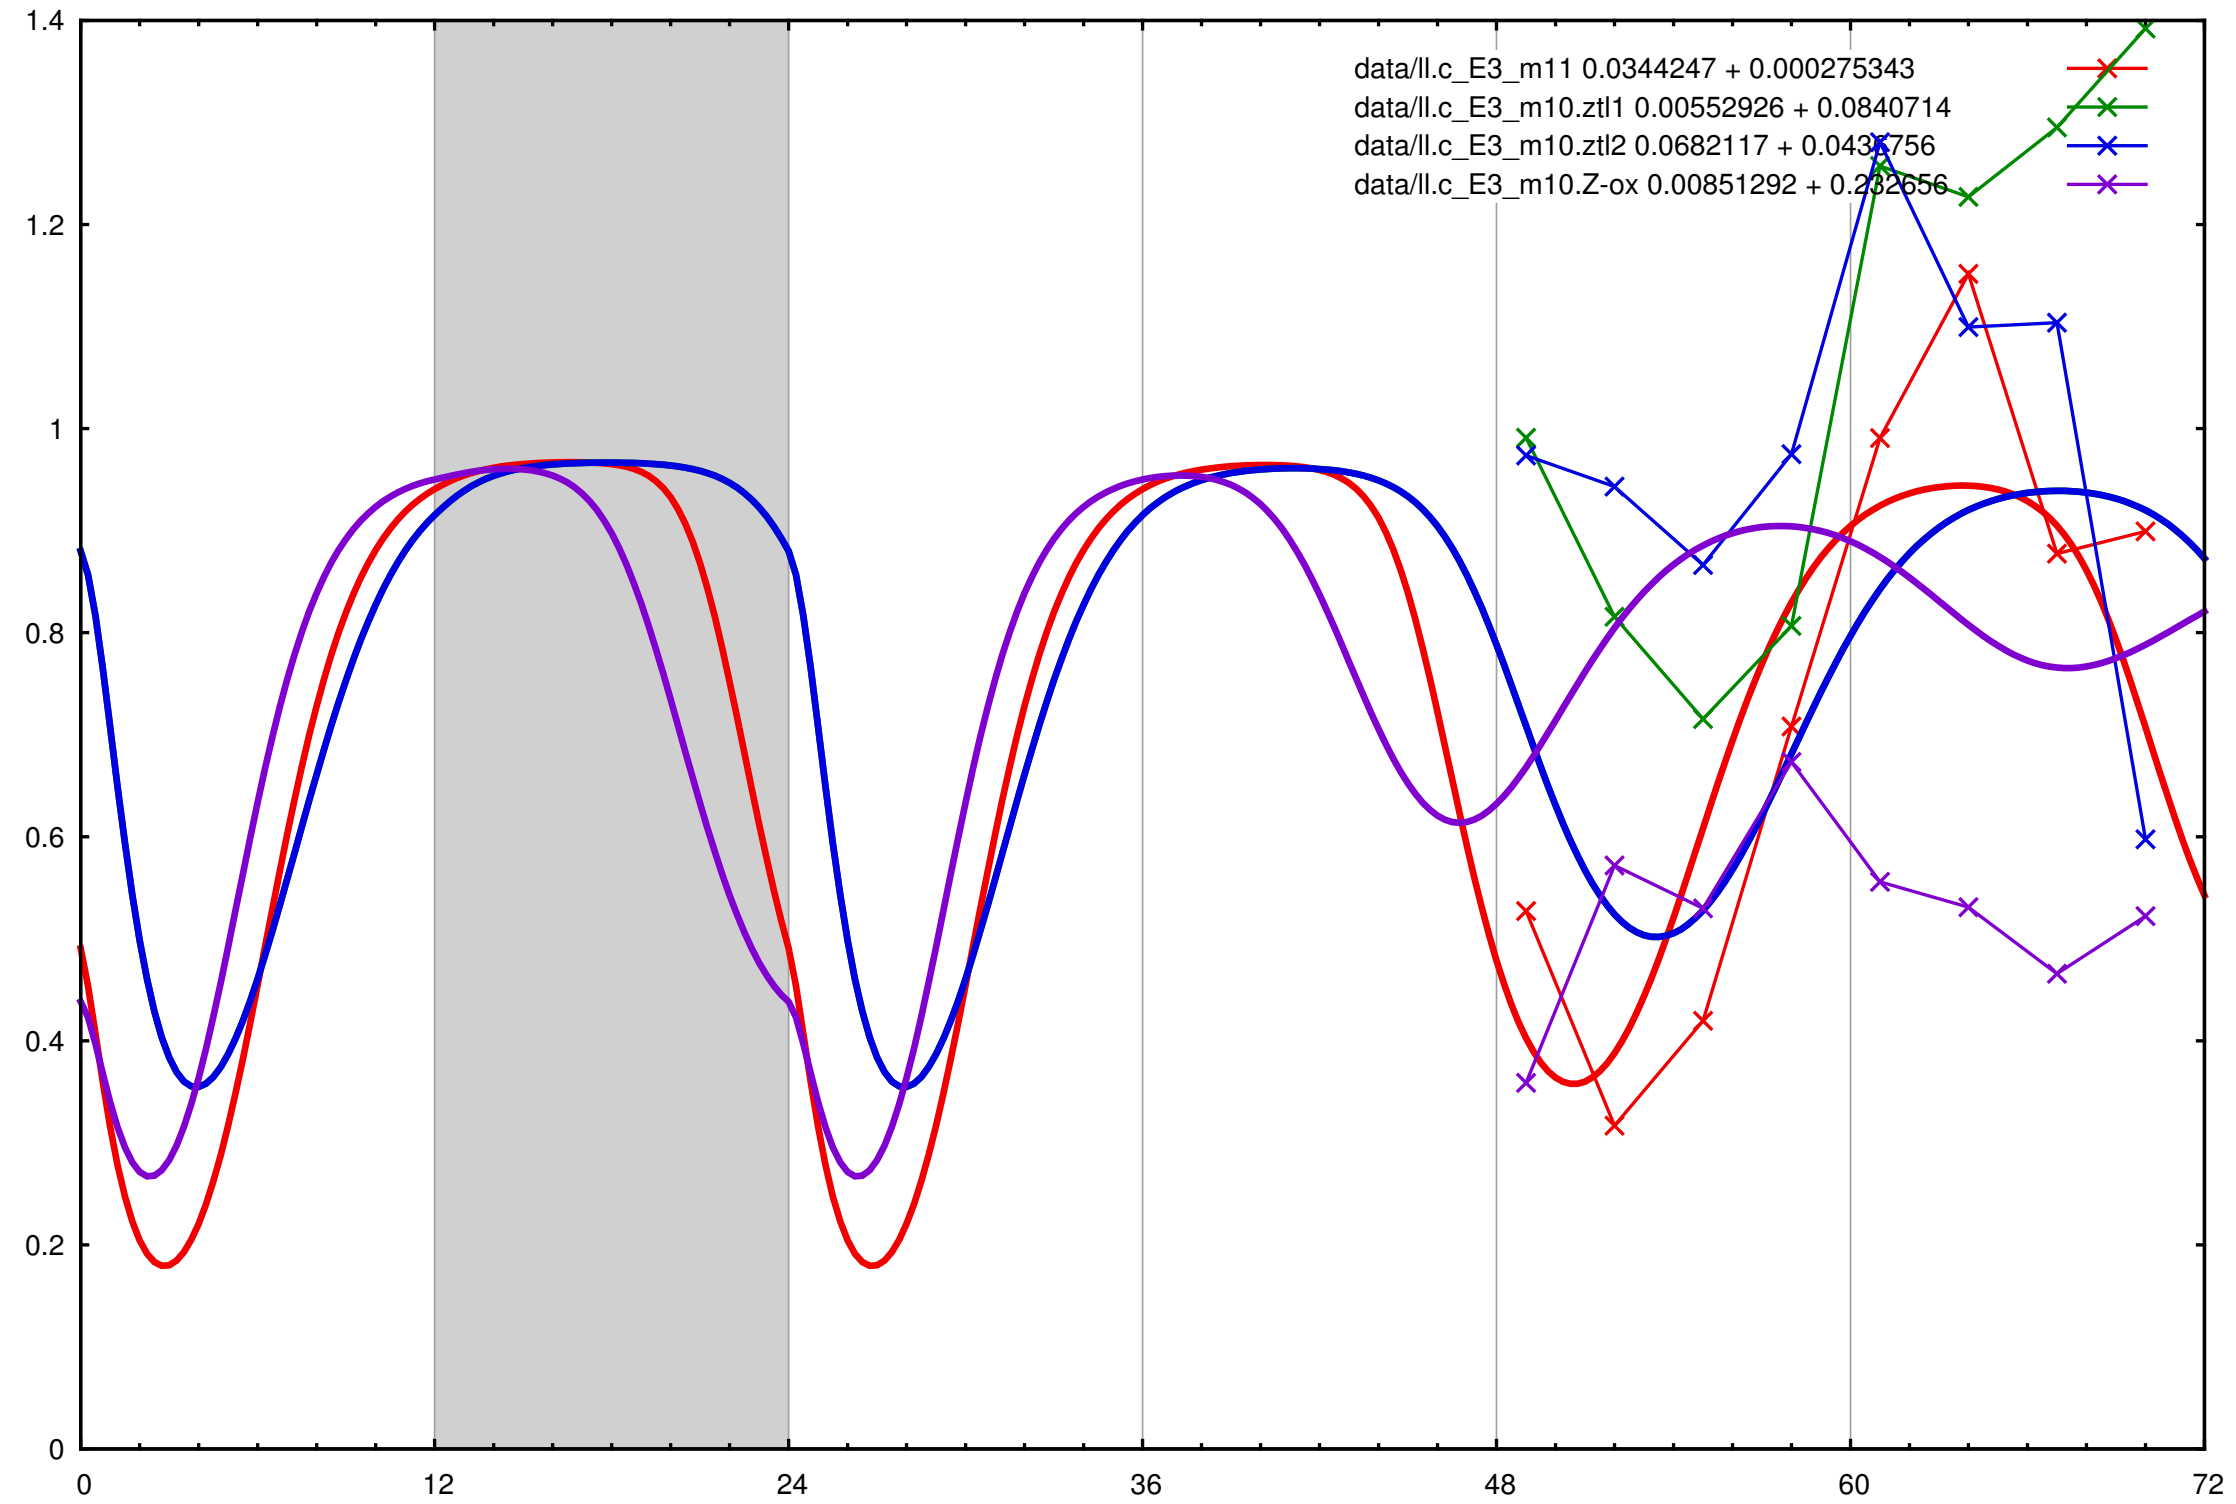

Scale group 68, scost 1.11801e-06

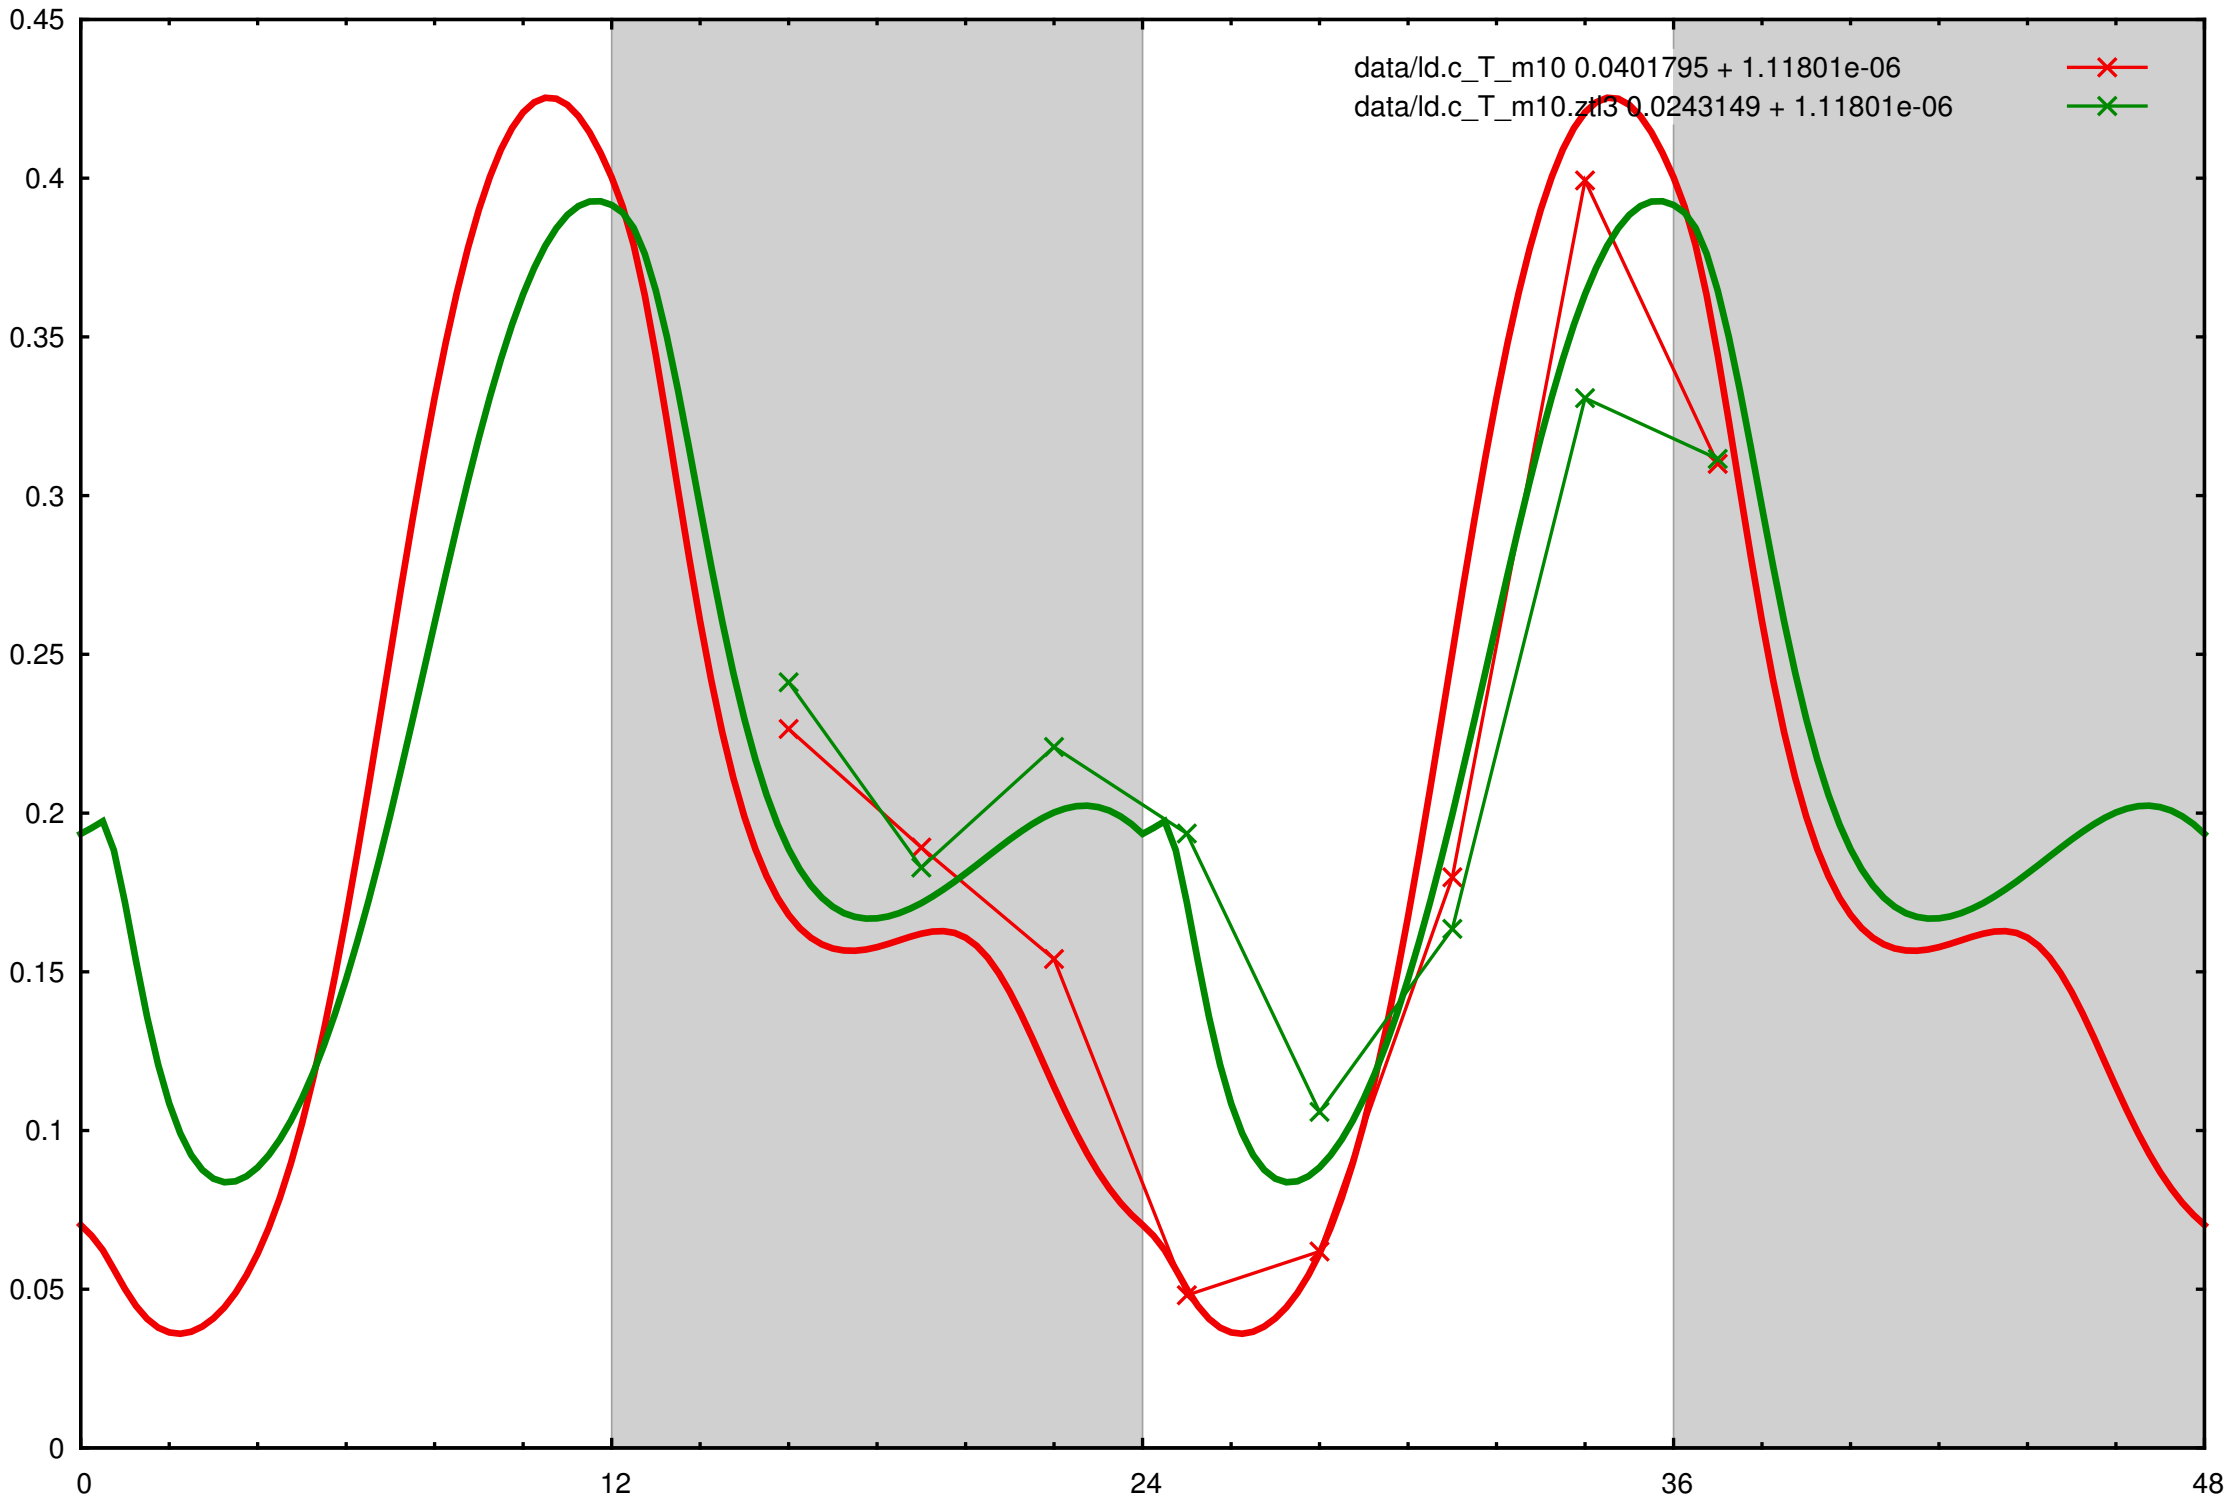

Scale group 69, scost 0.0160294

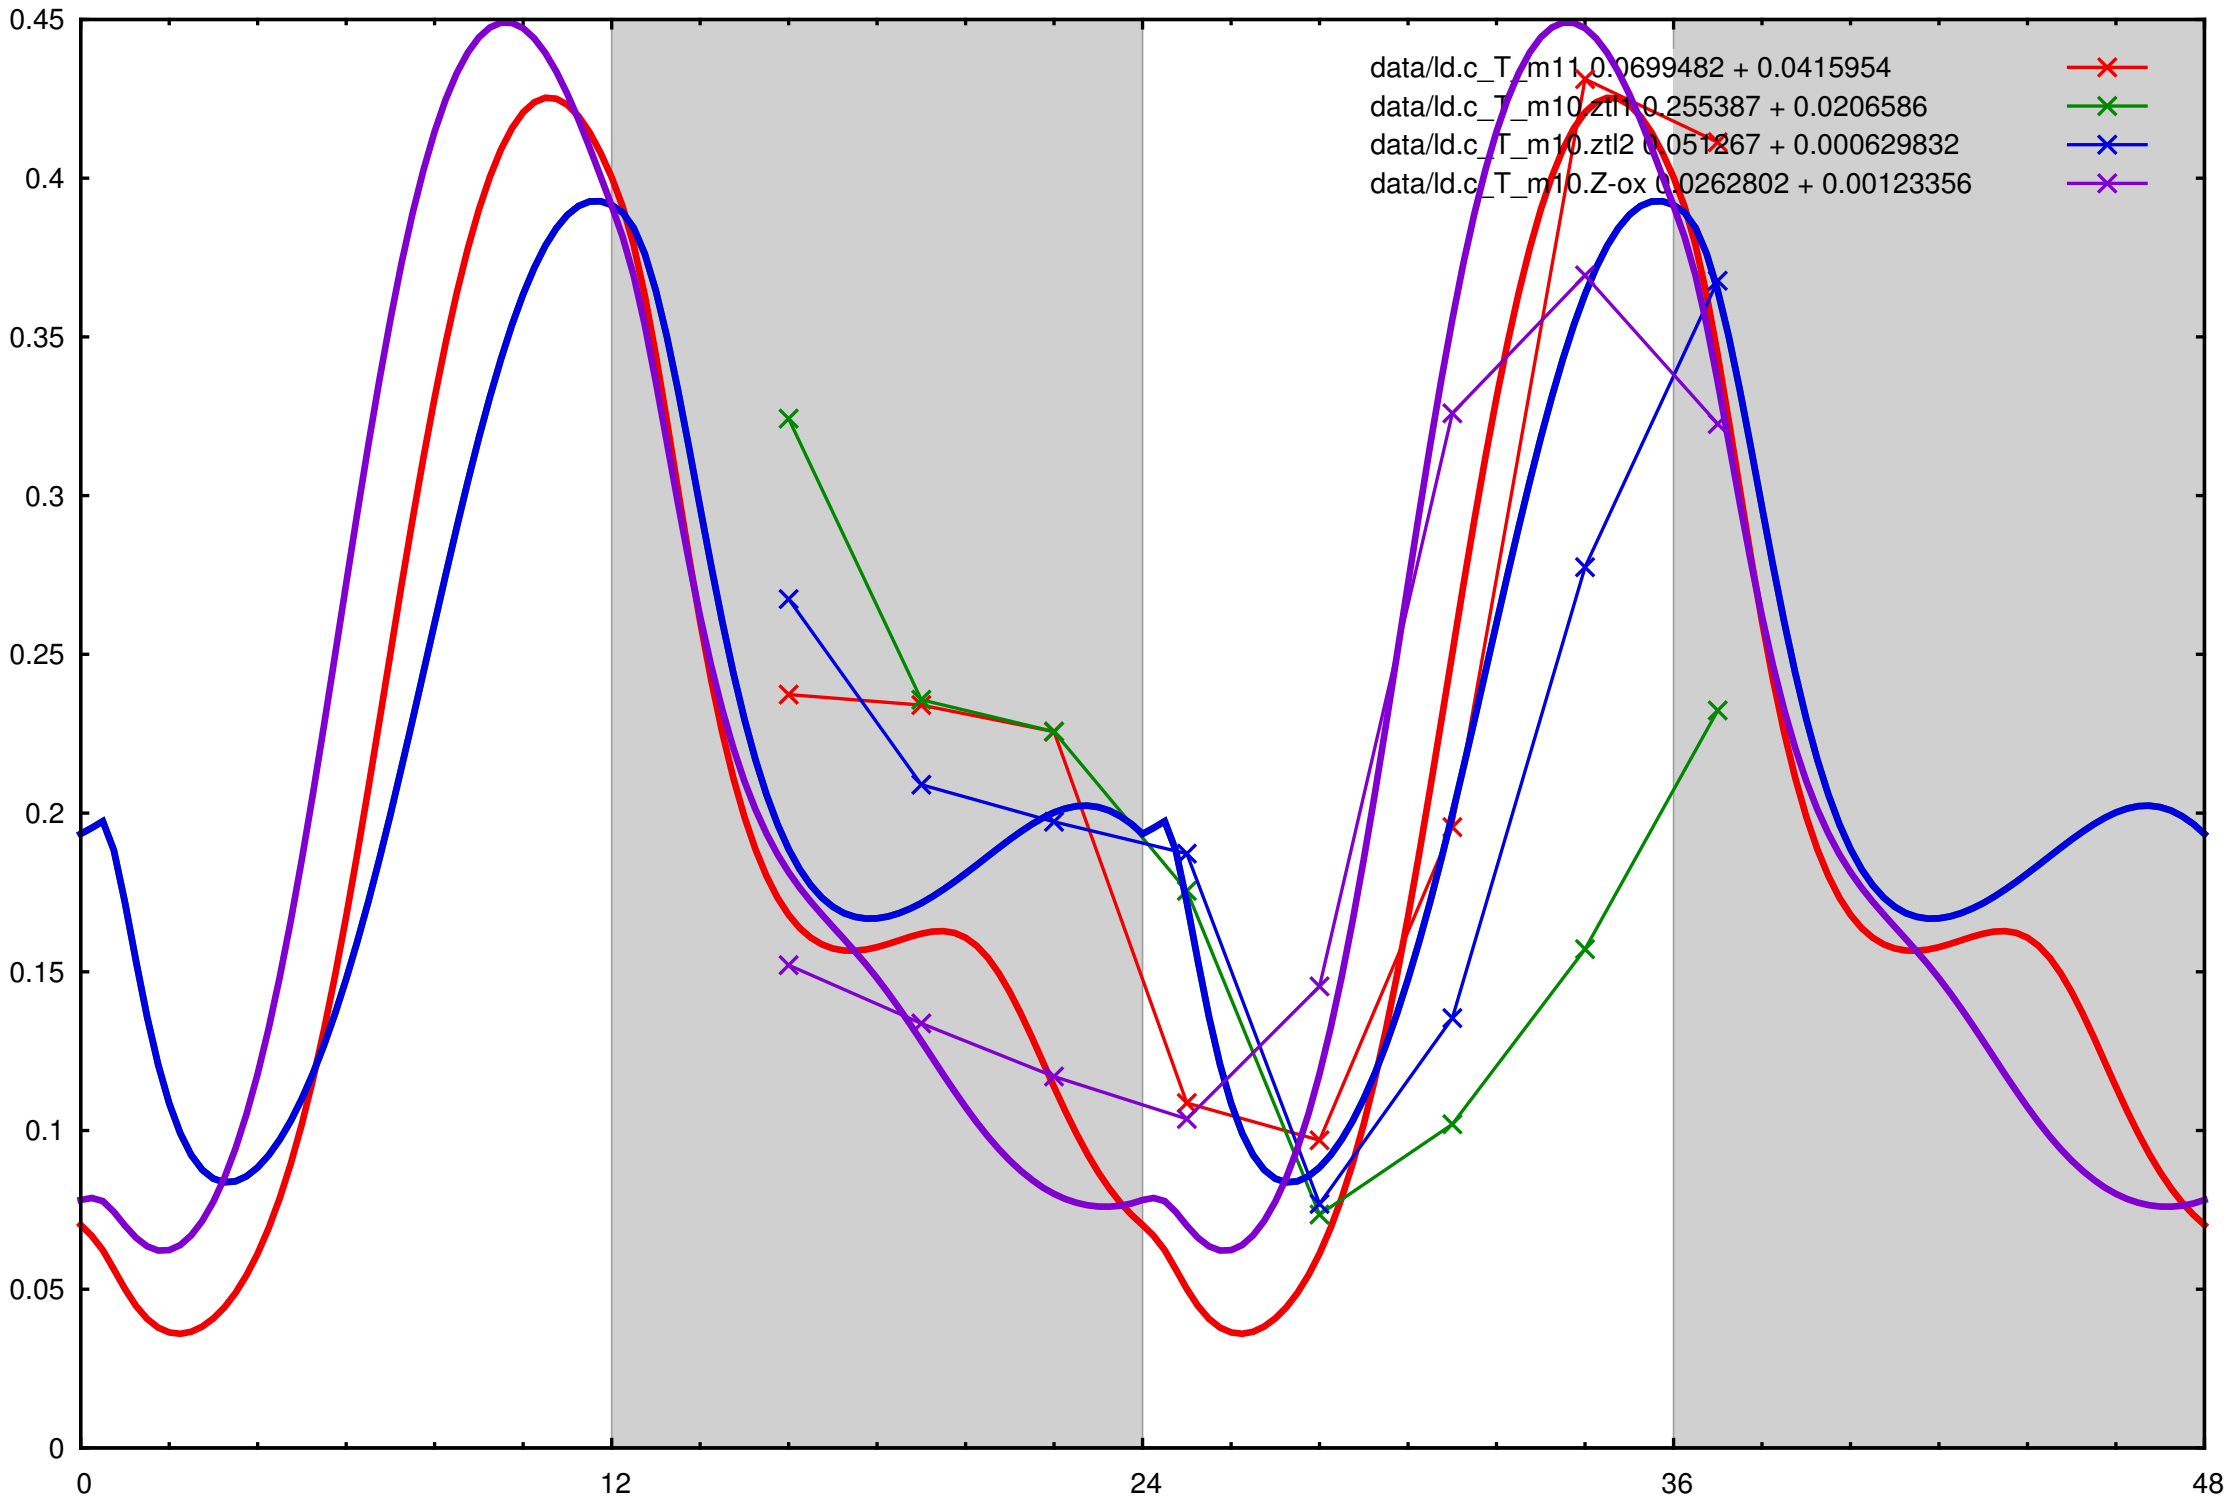

Scale group 70, scost 0.0502899

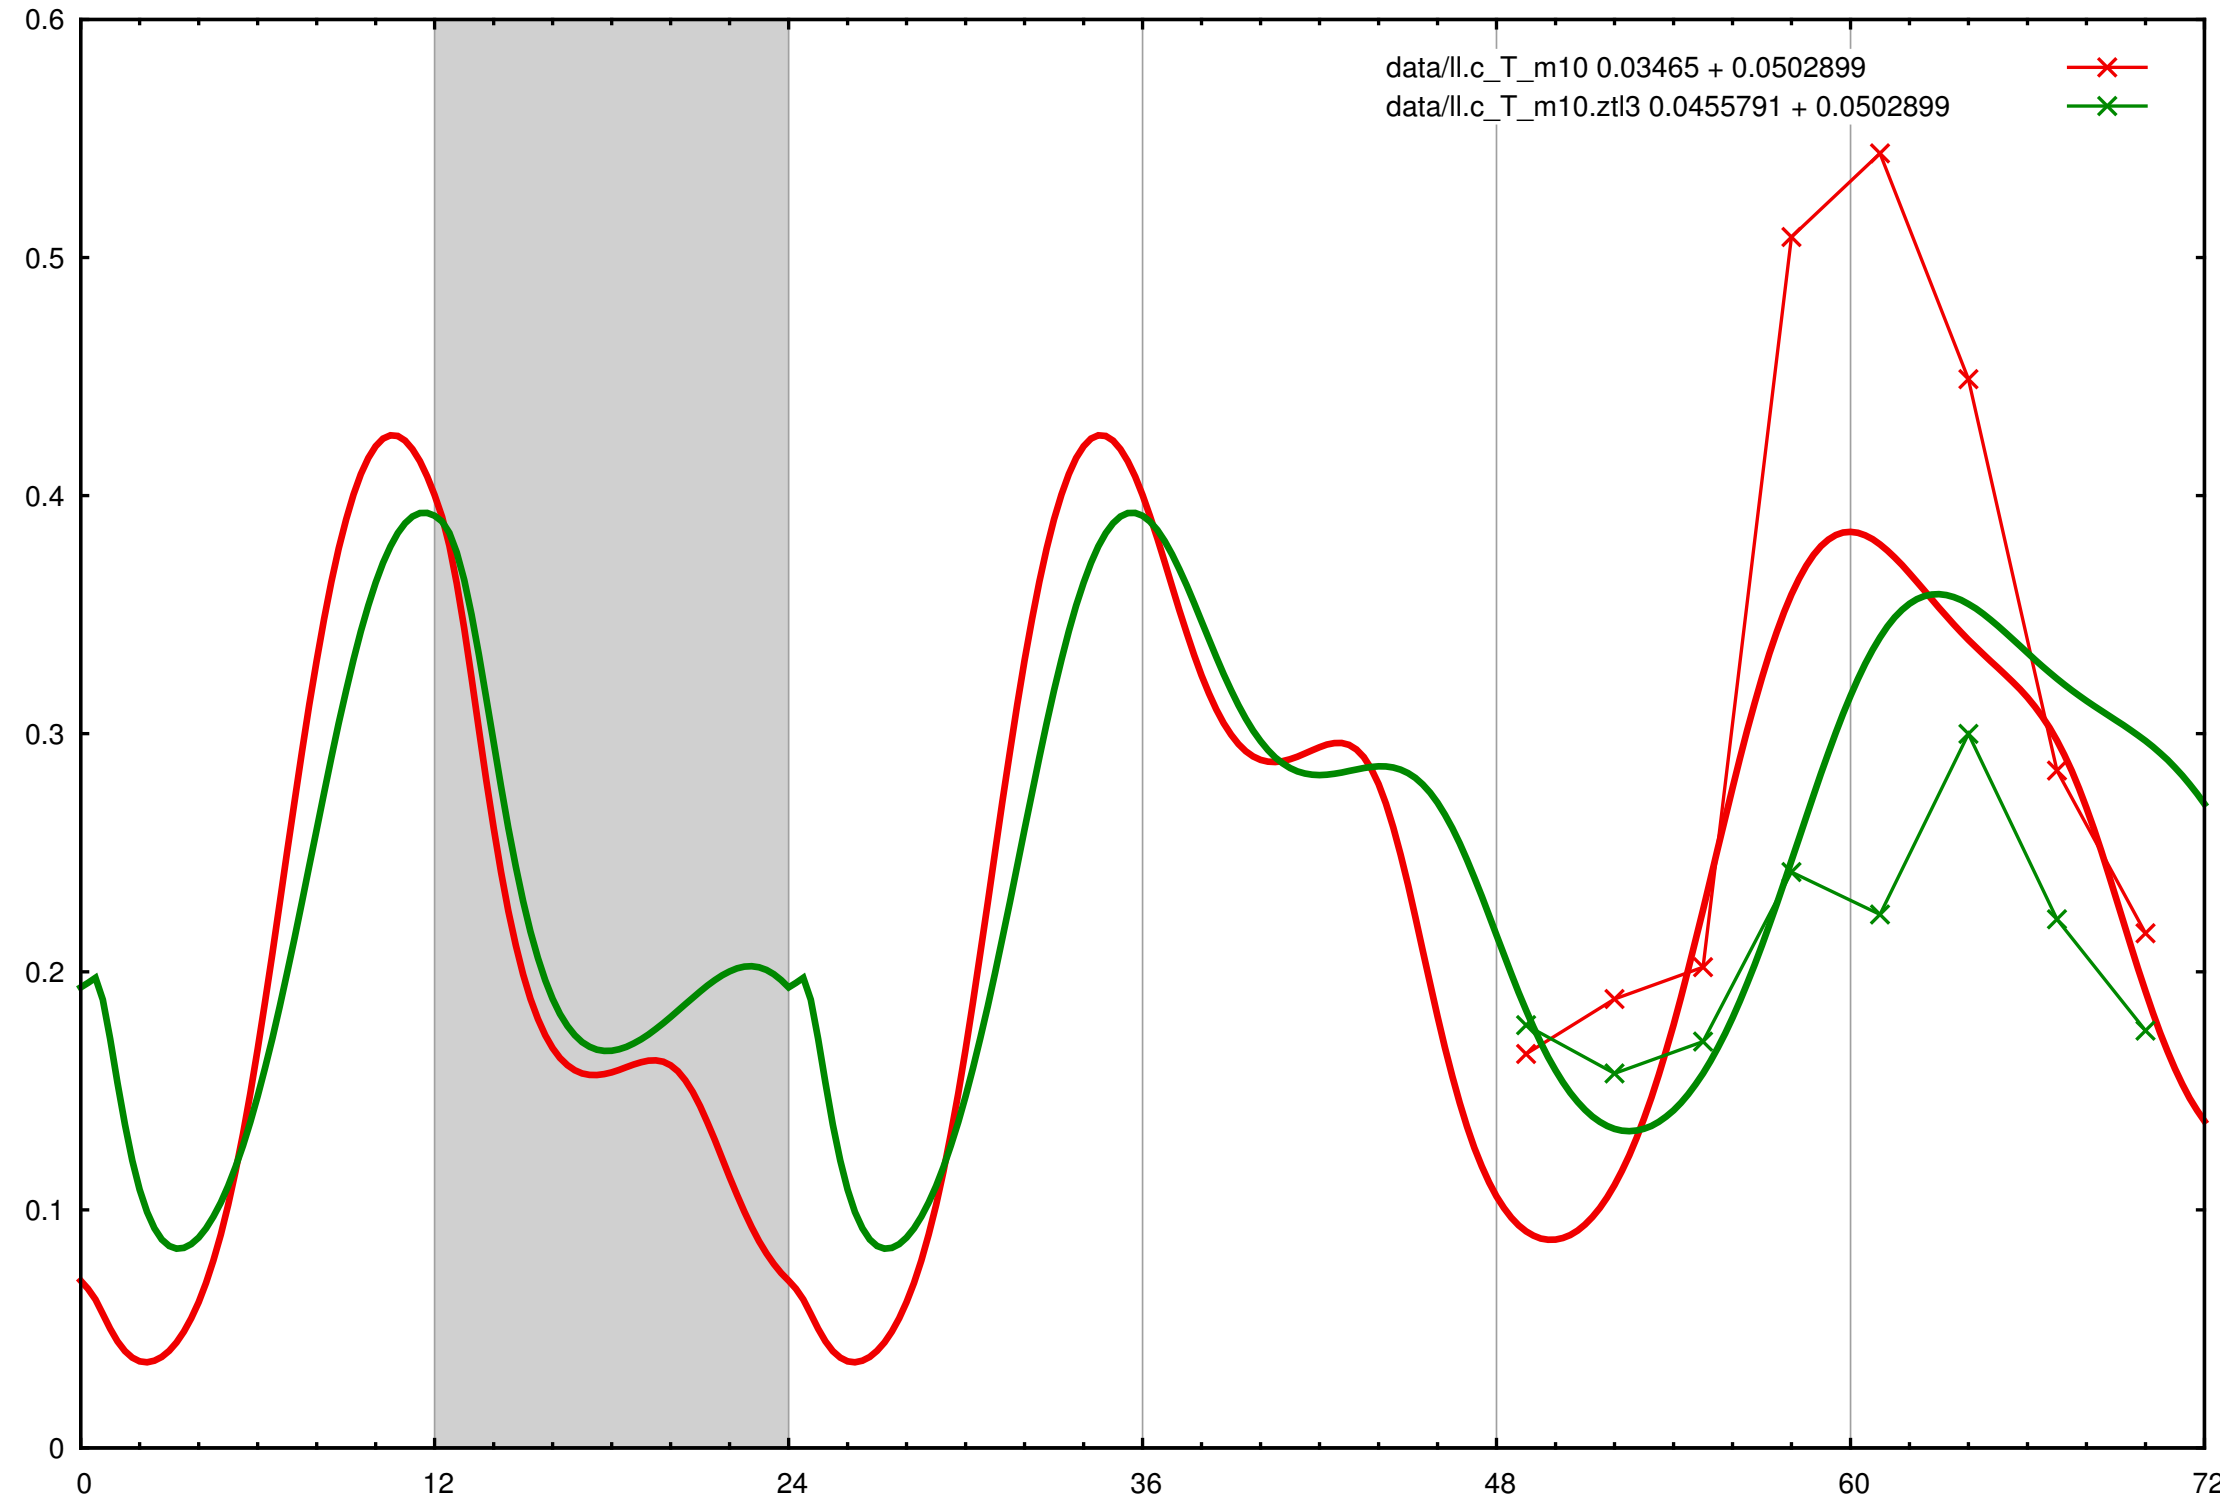

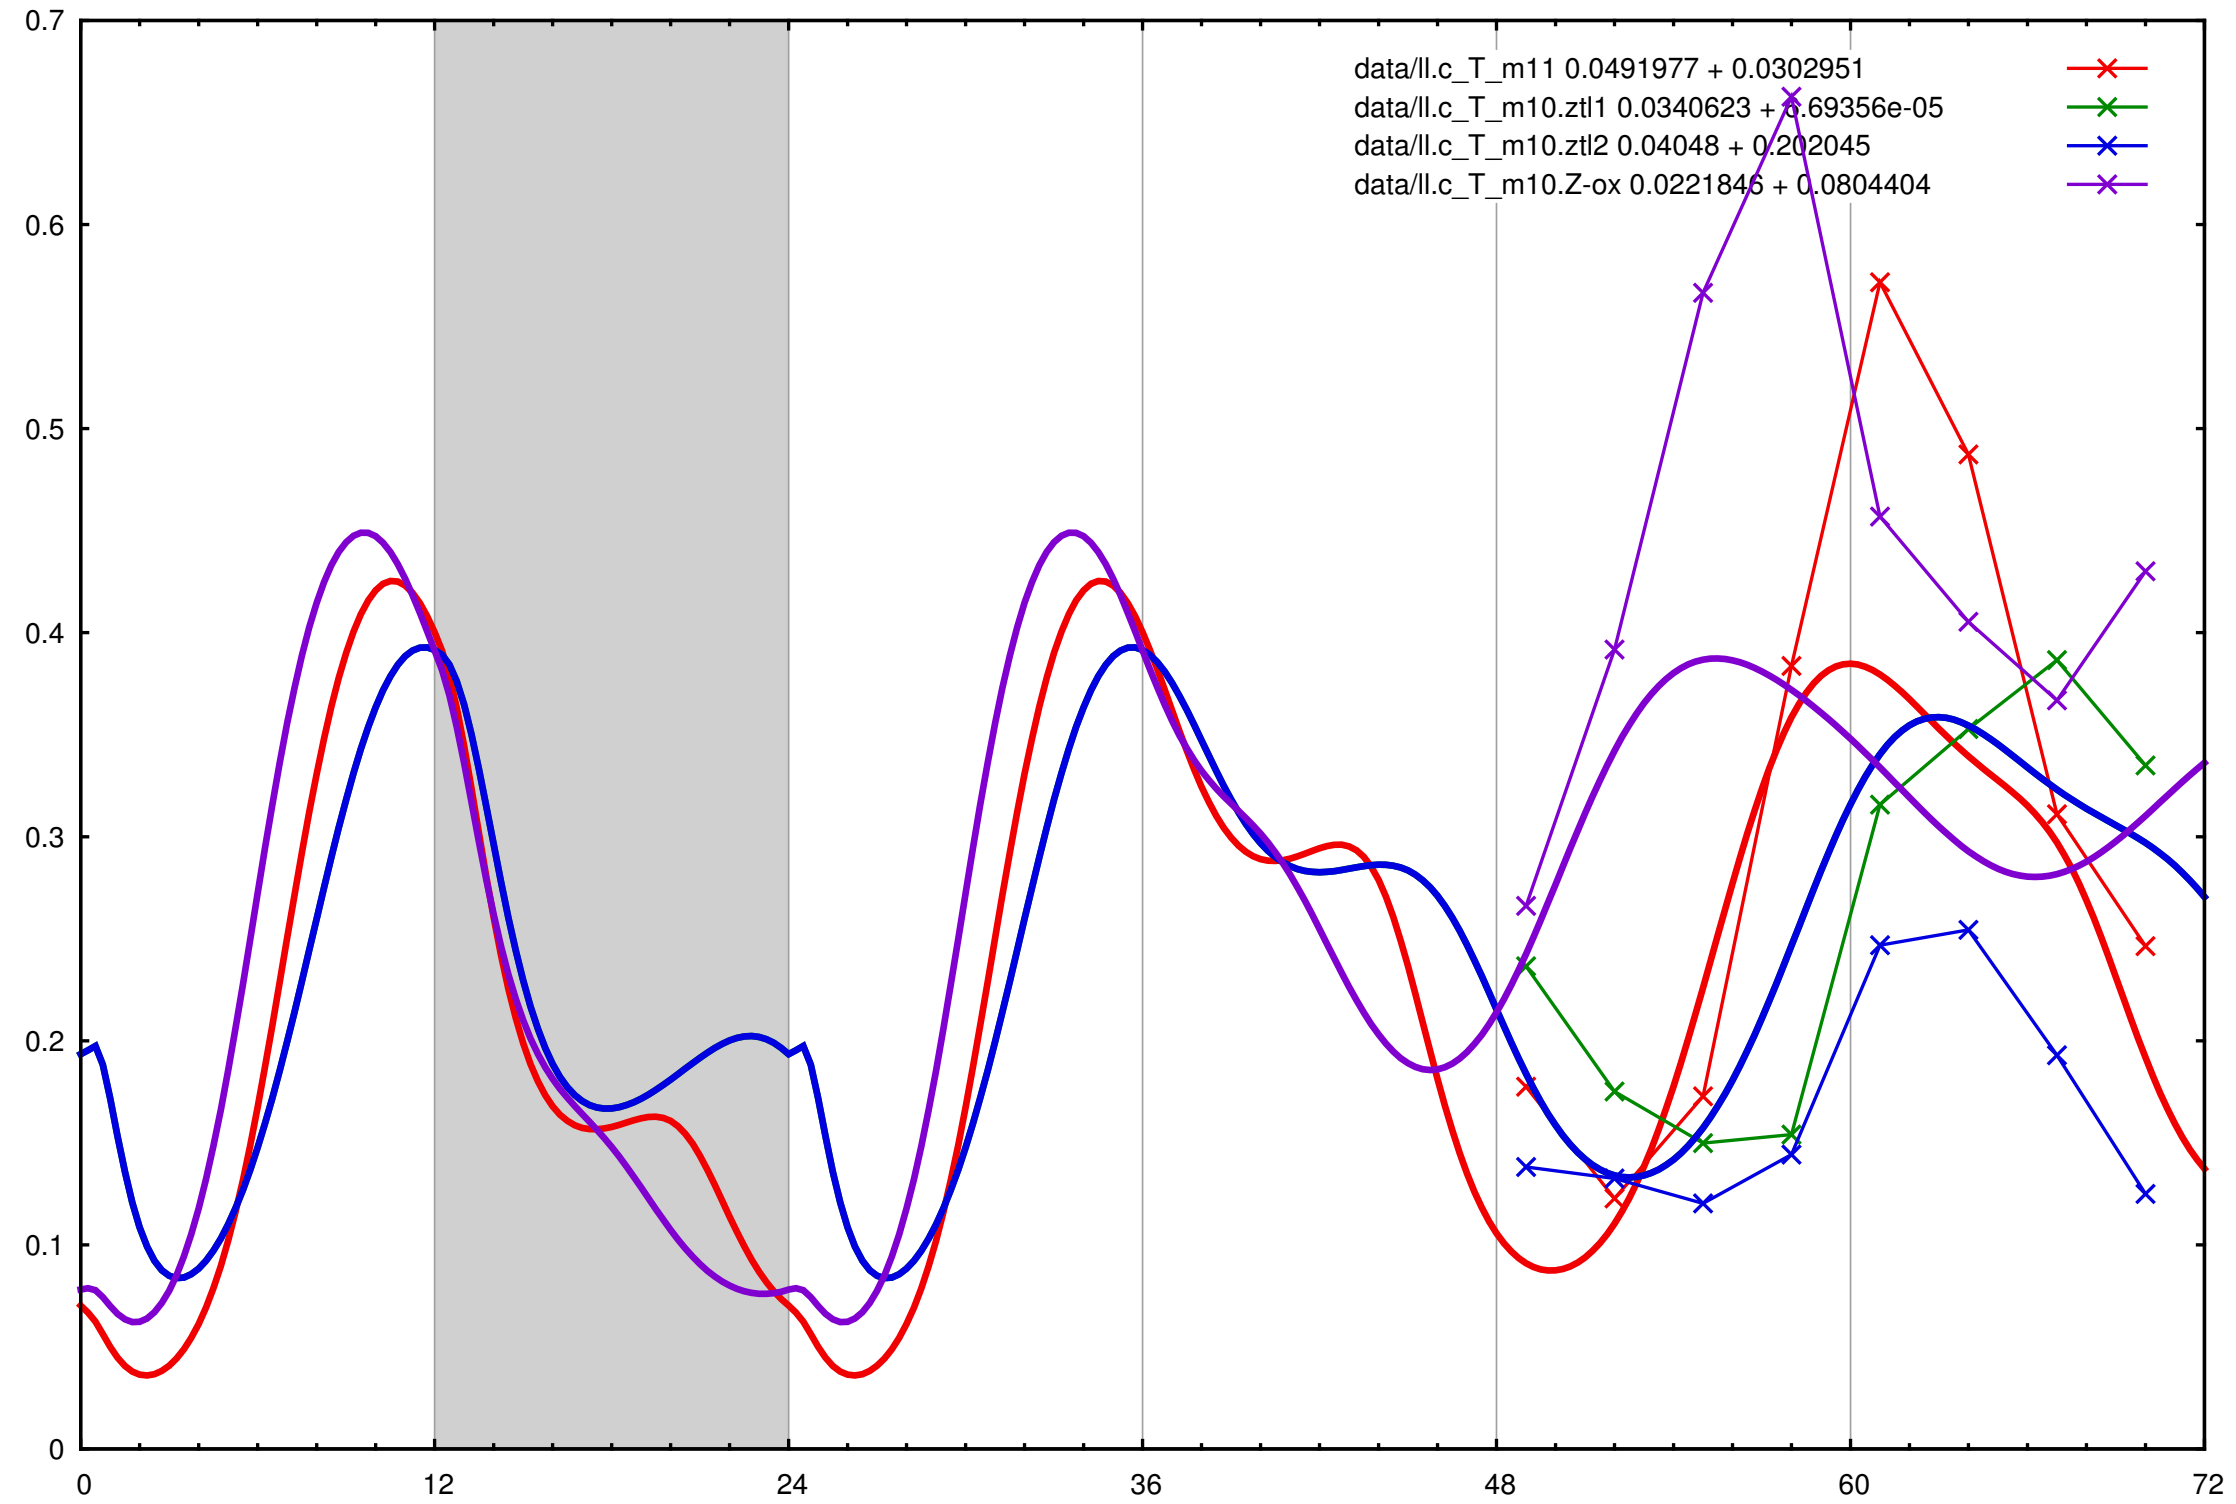

Scale group 72, scost 0.0915557

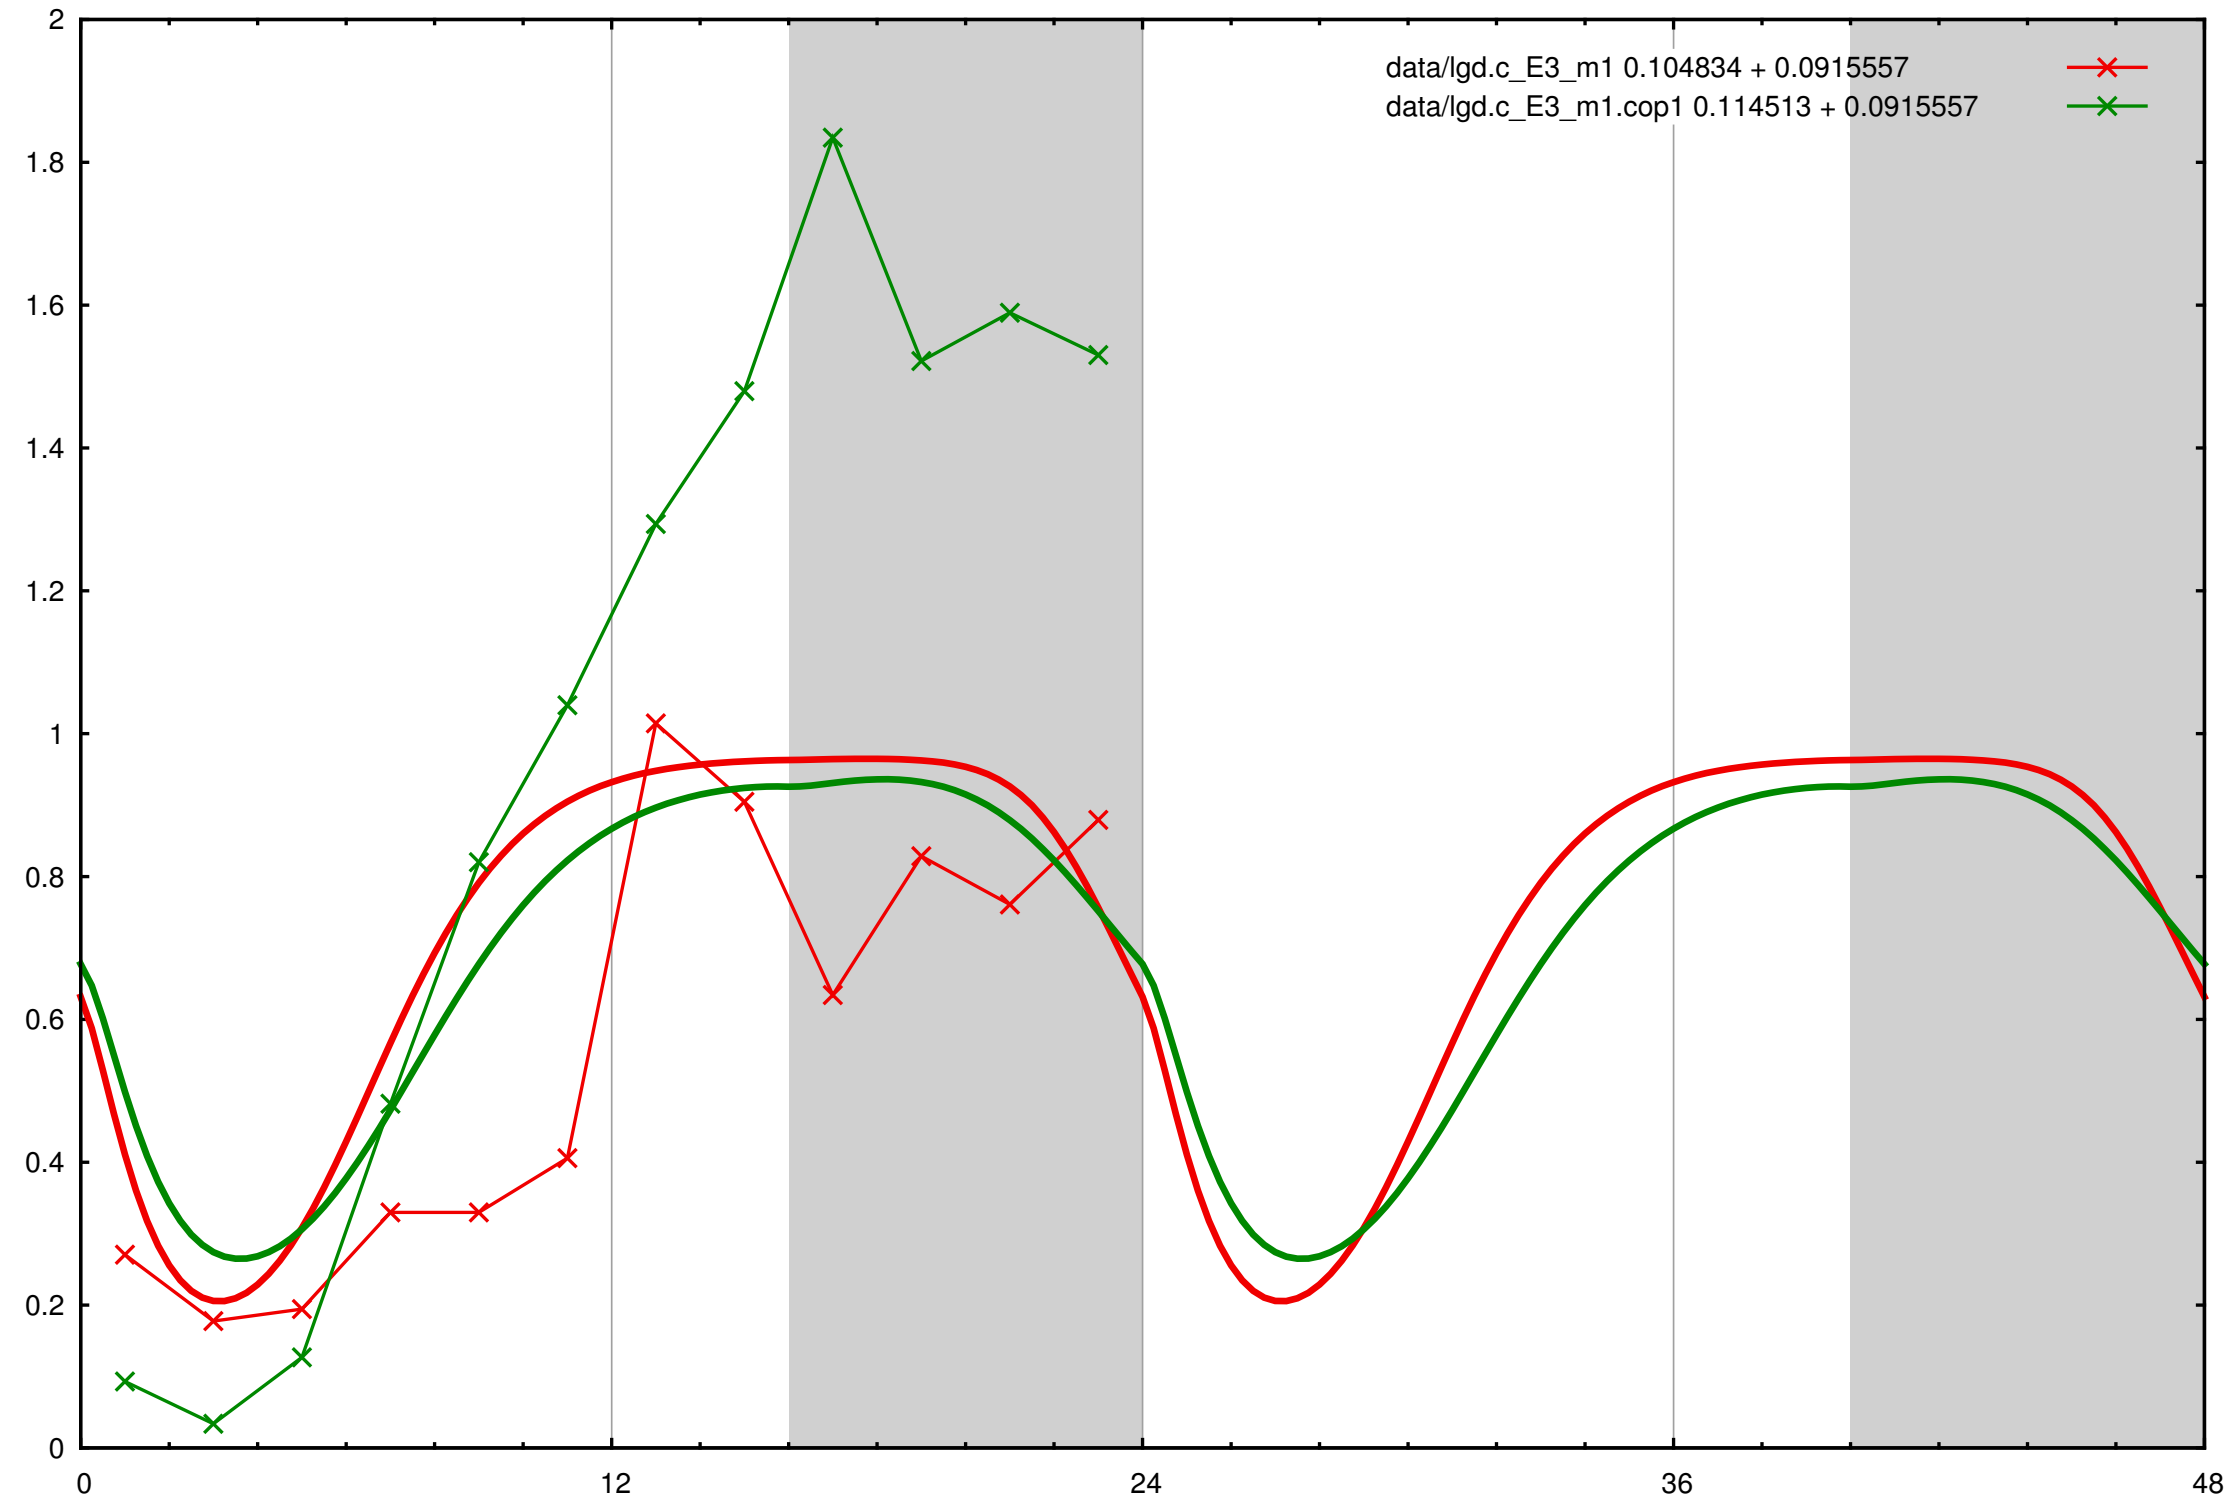



Scale group 73, scost 0.0197253

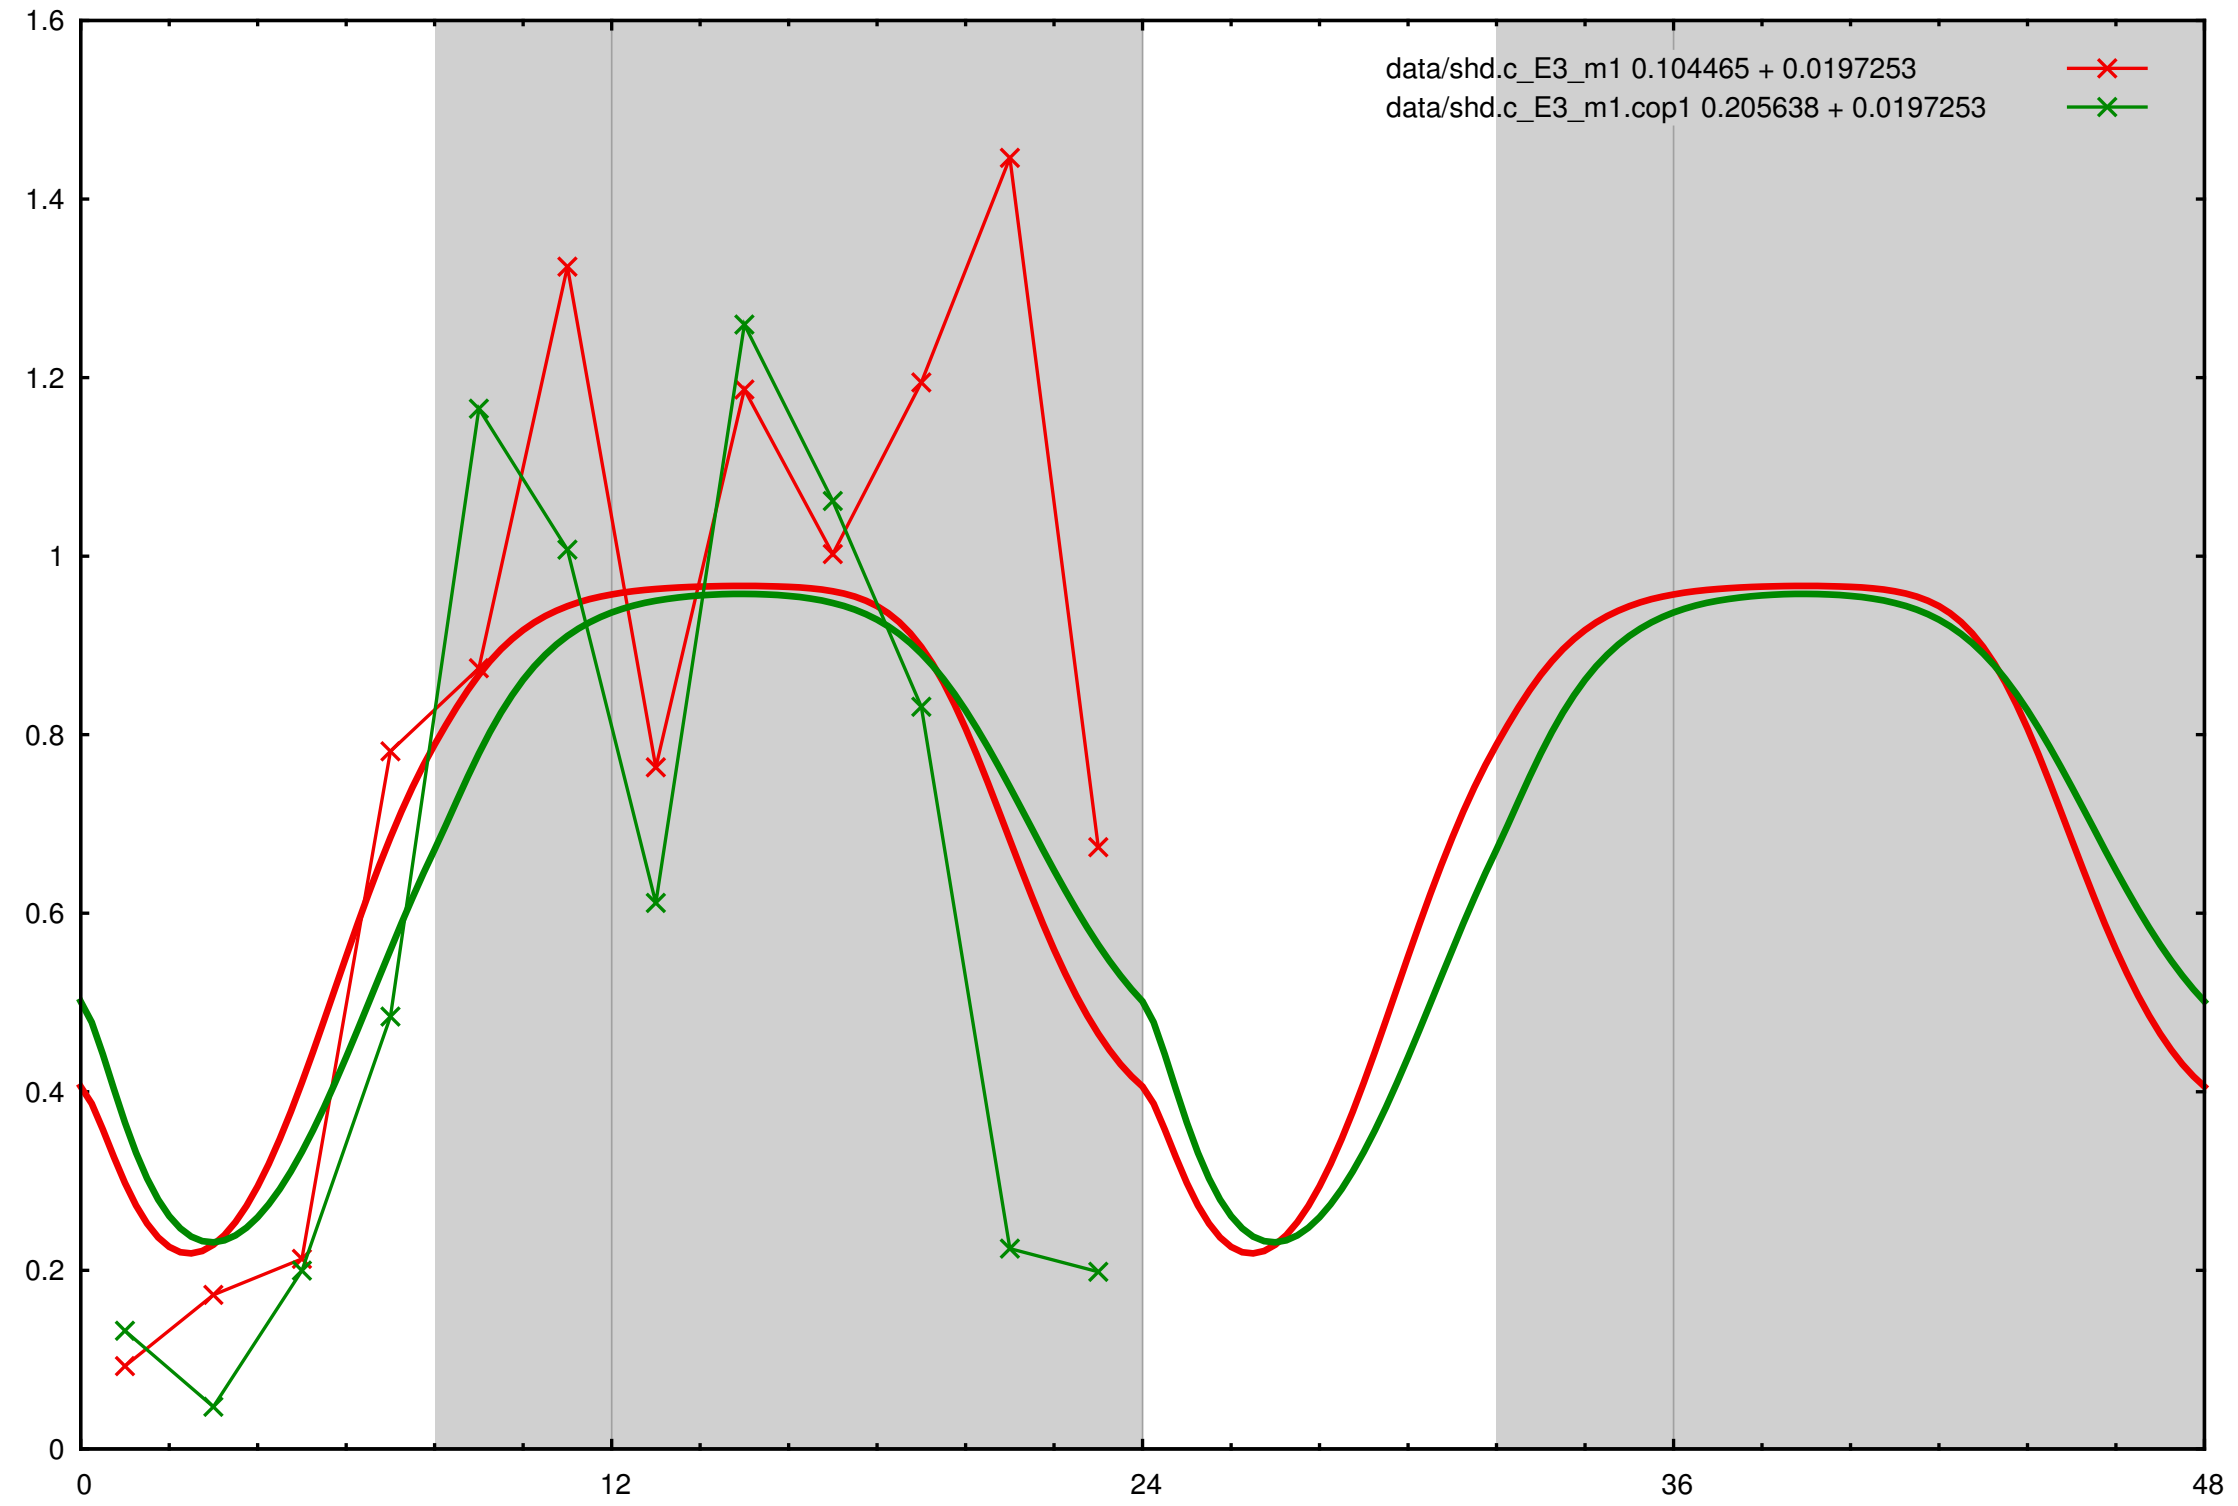

Scale group 74, scost 0.0324284

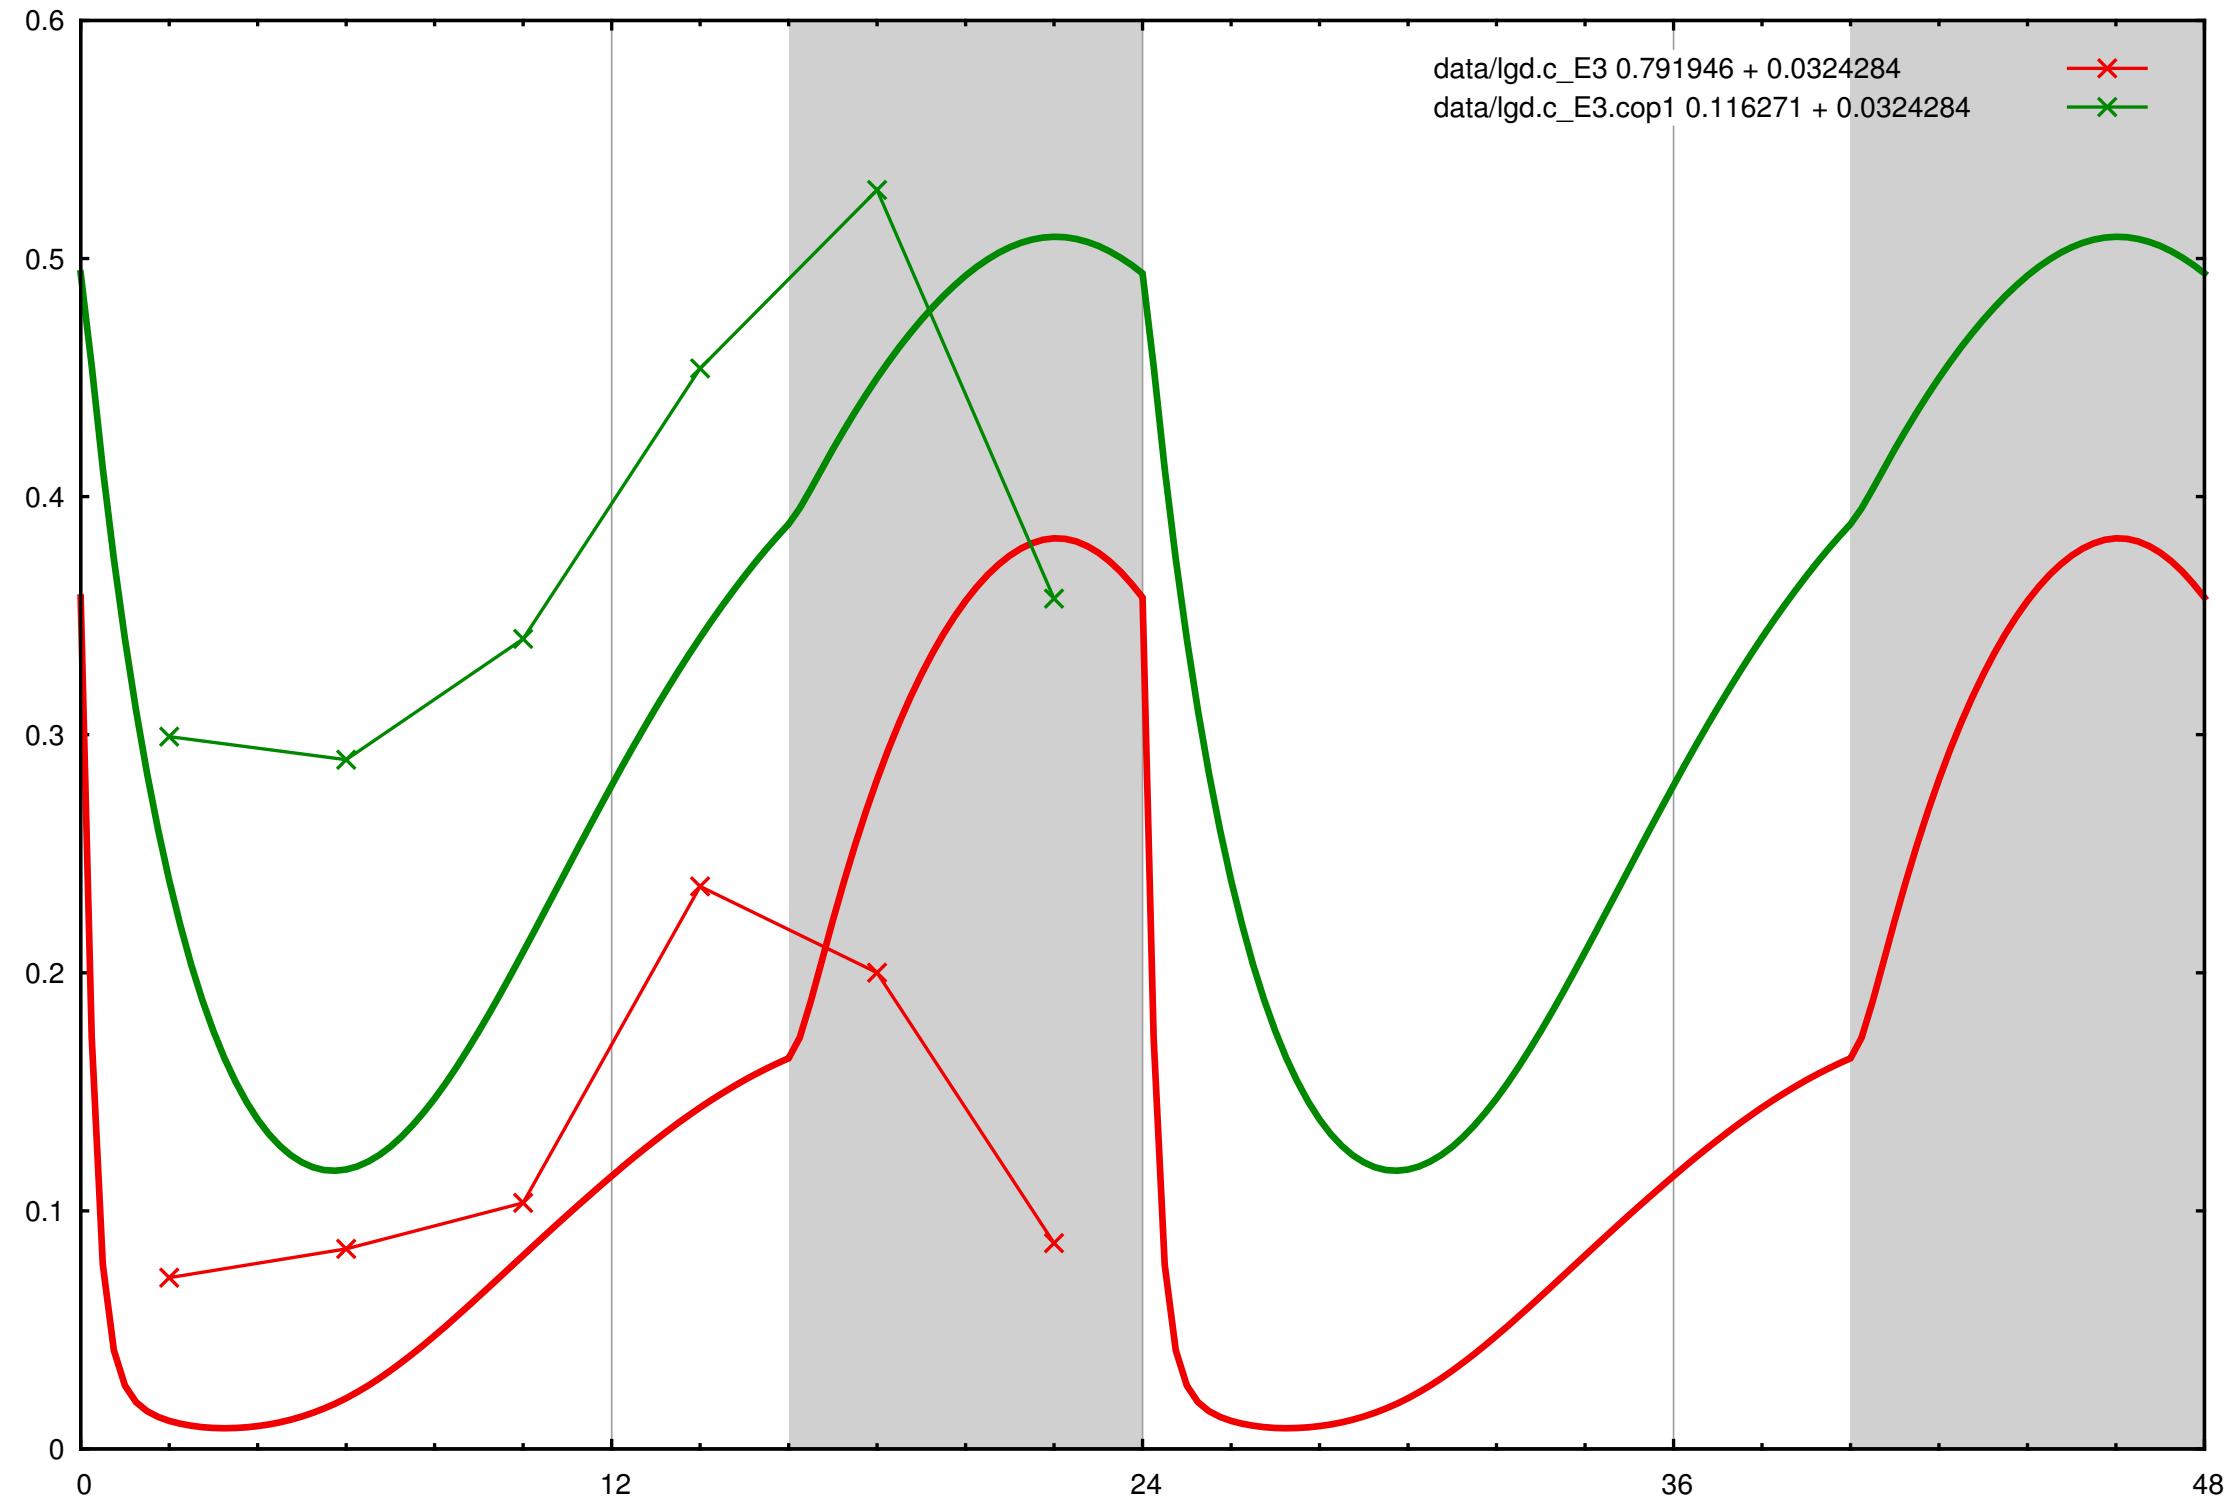

Scale group 75, scost 0.136088

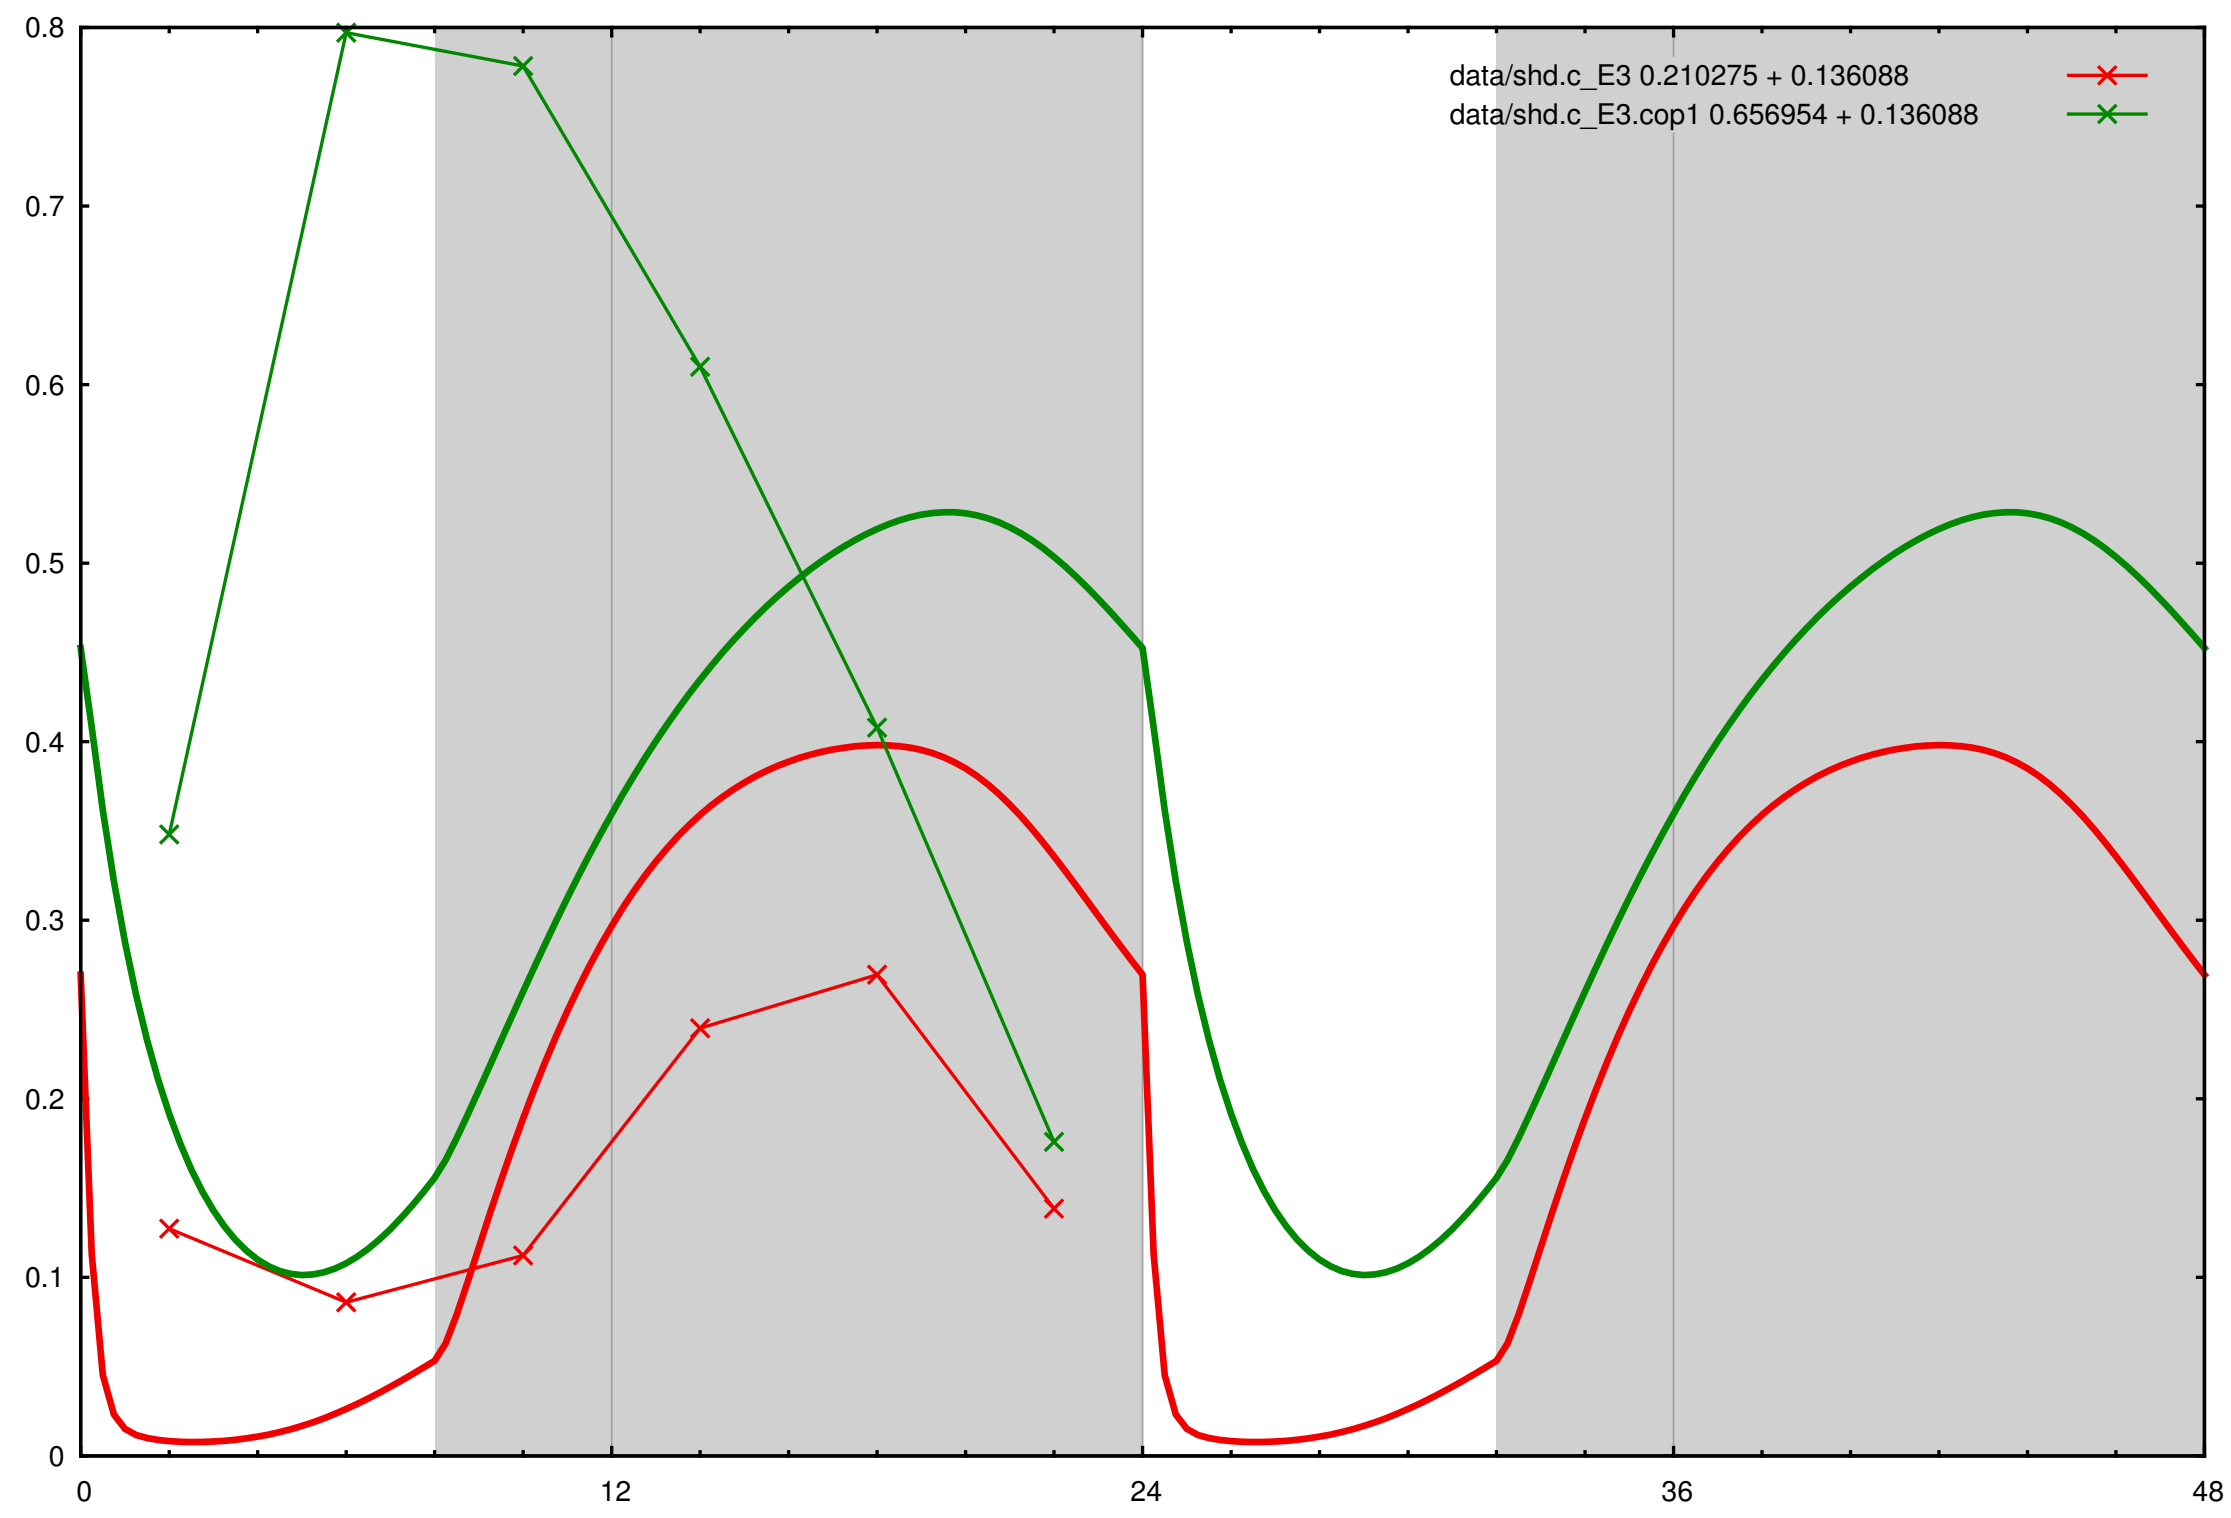

Scale group 76, scost 0.108725

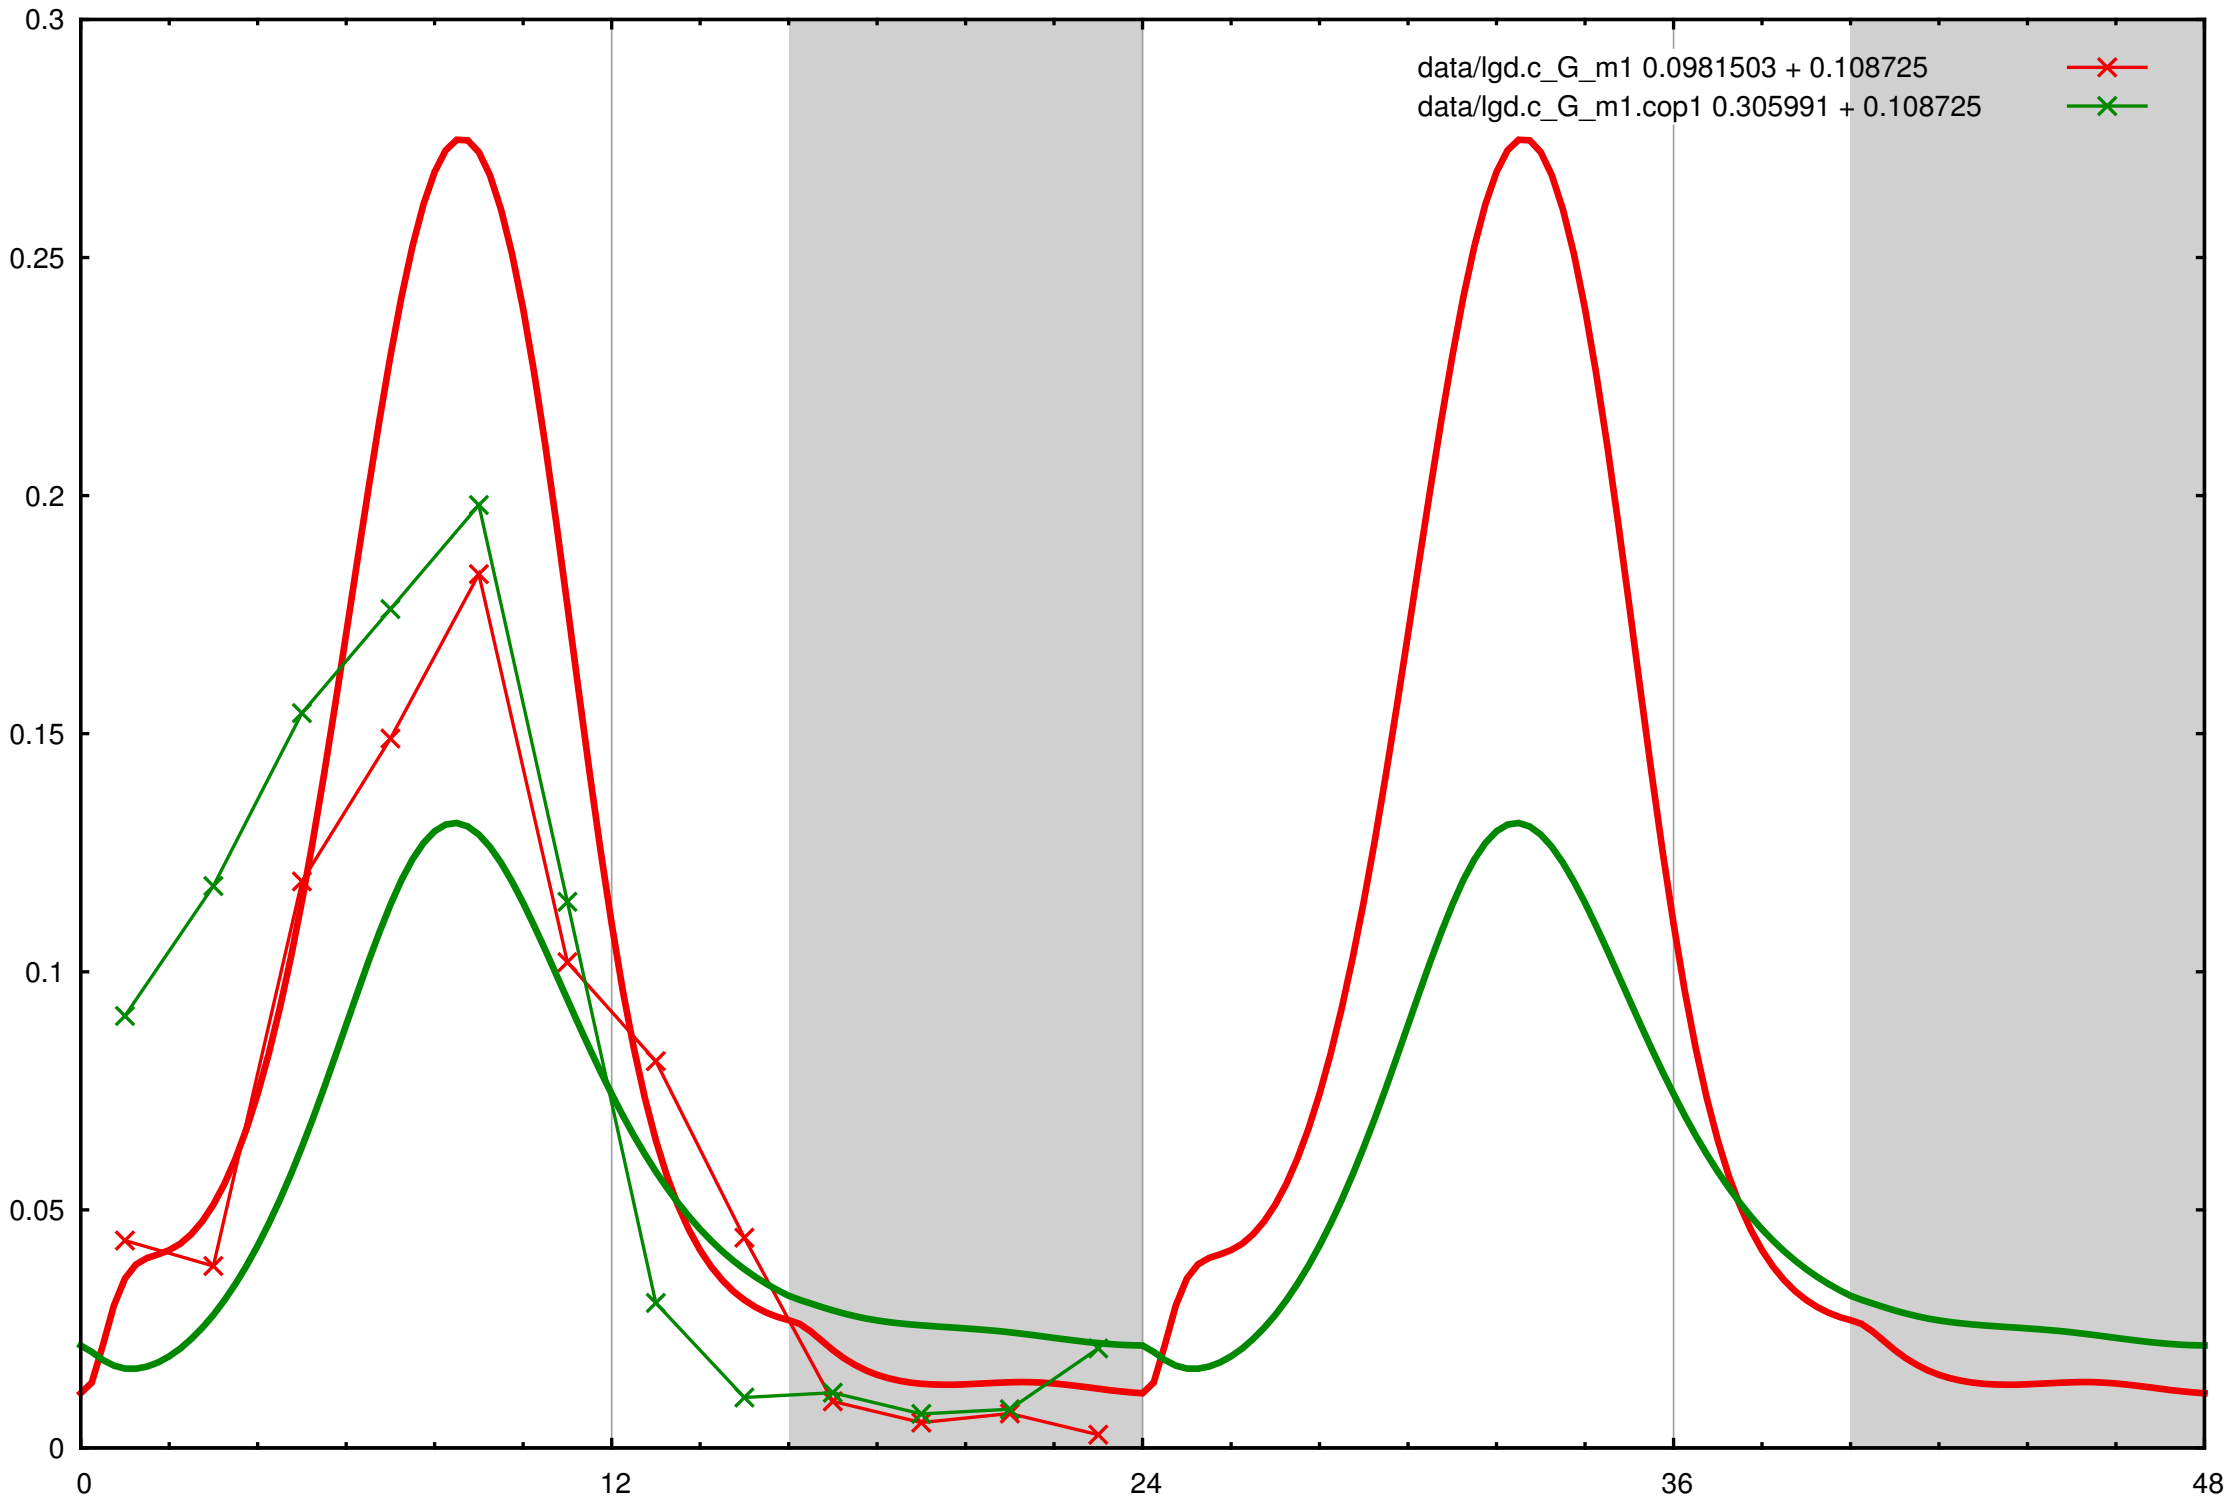

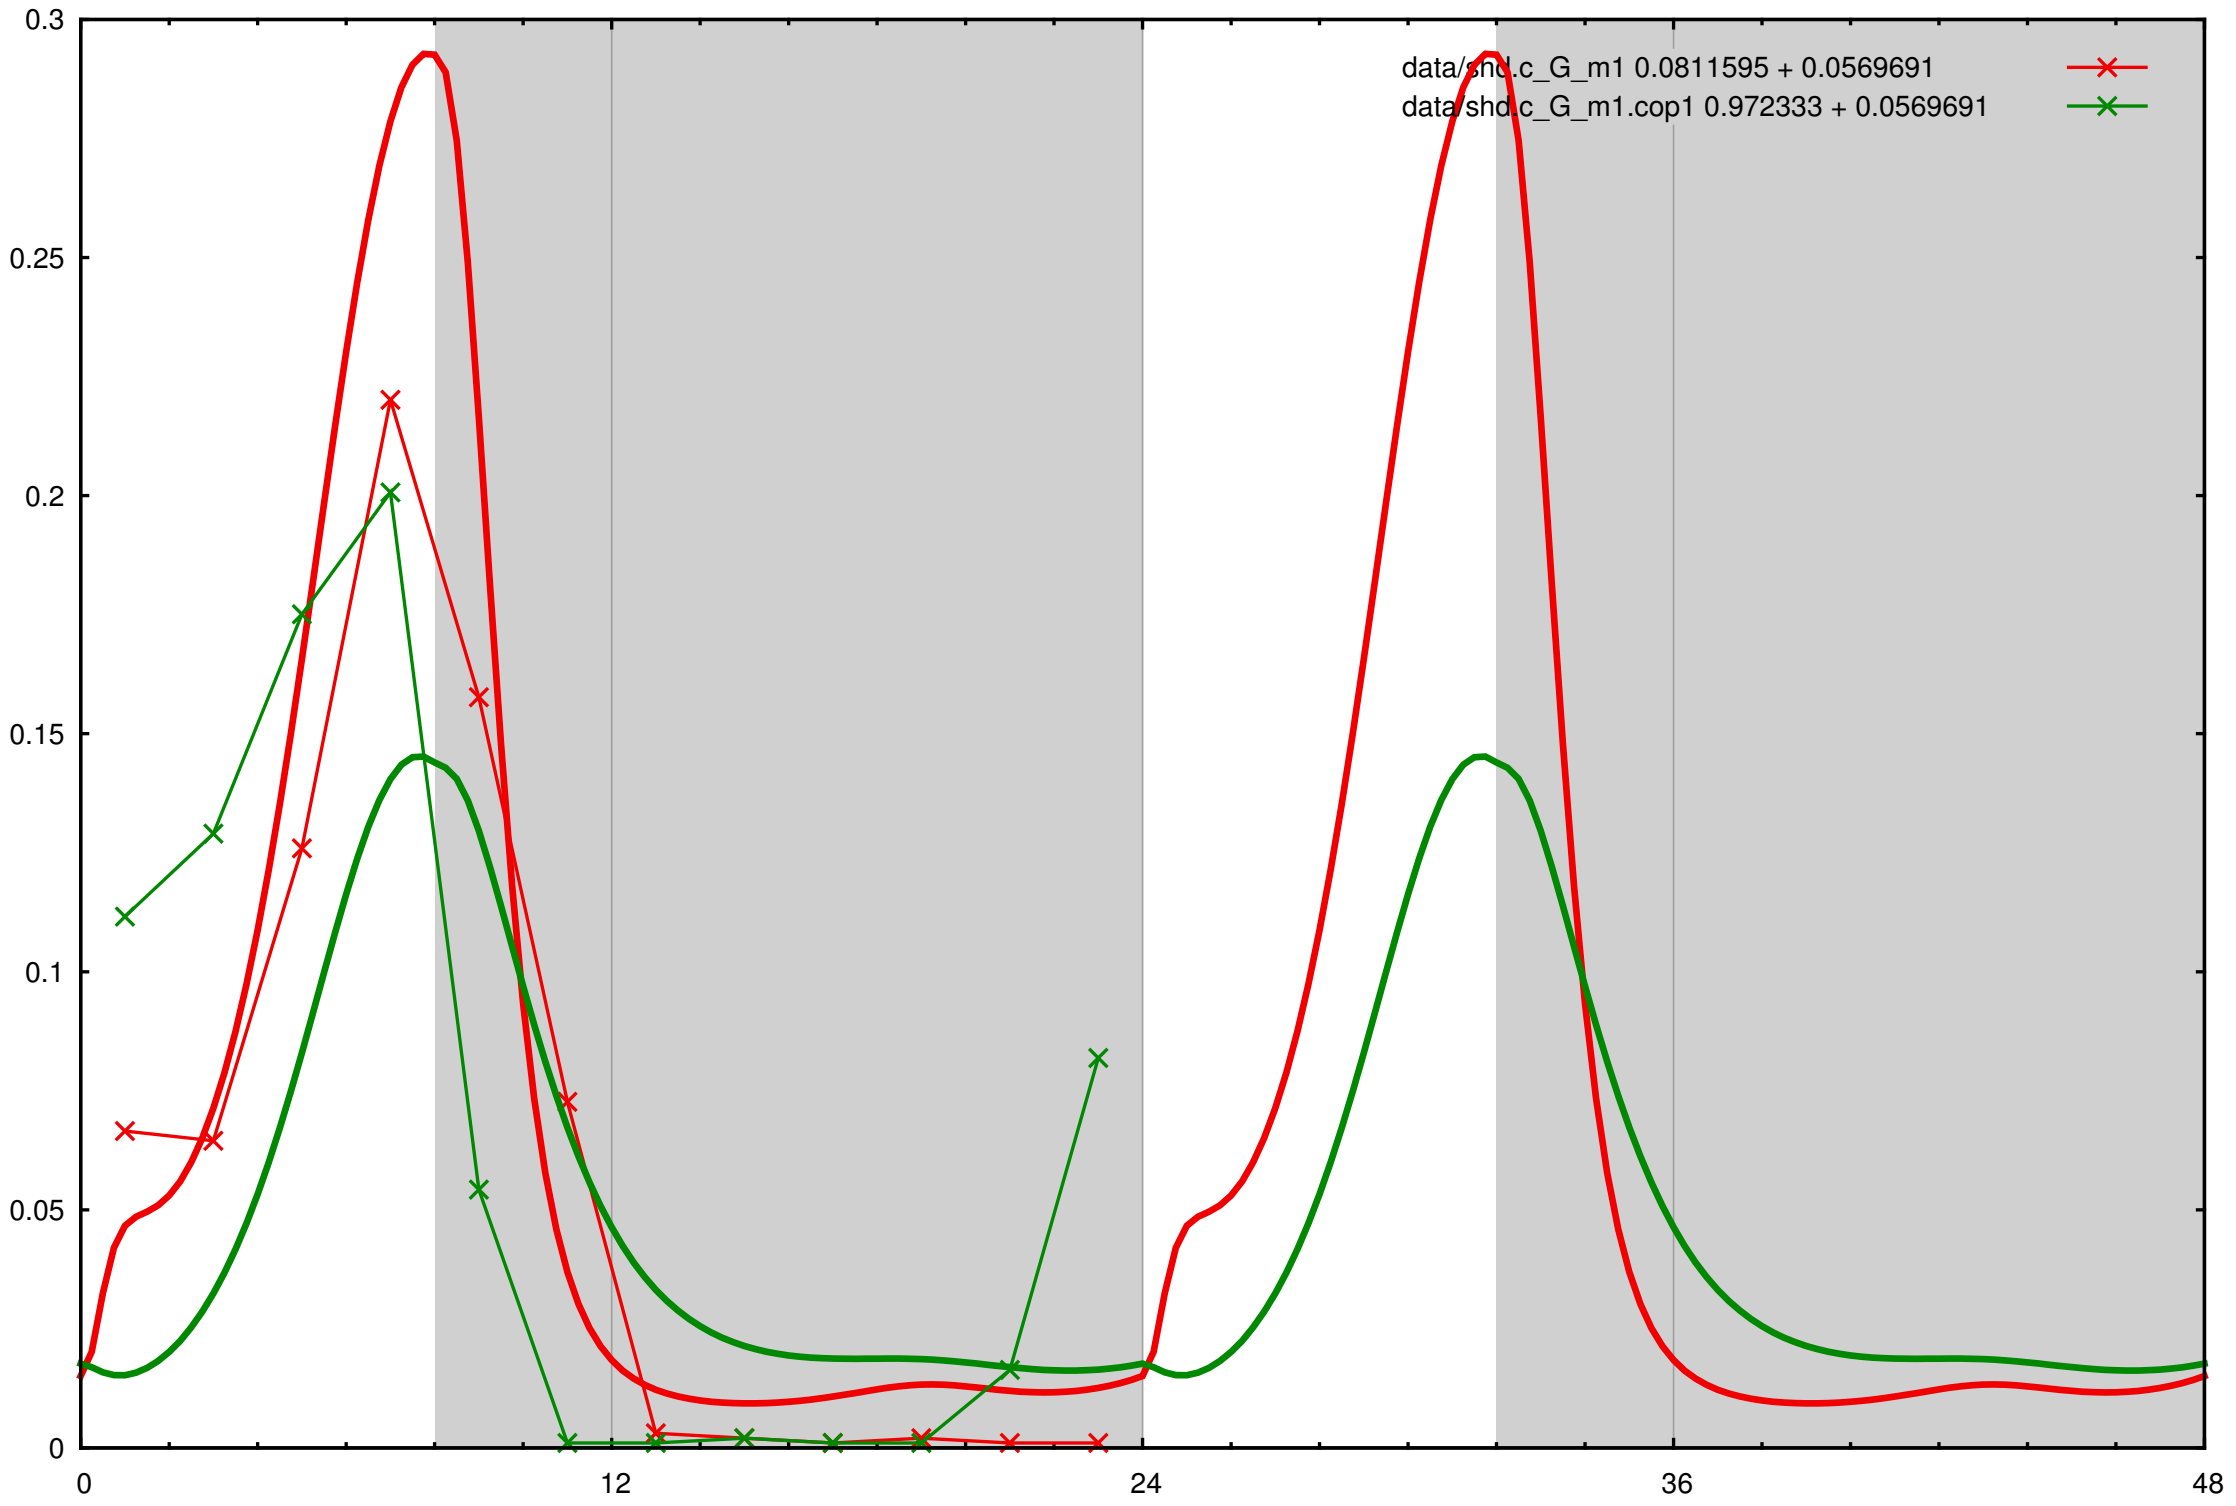

Scale group 78, scost 0.00888649

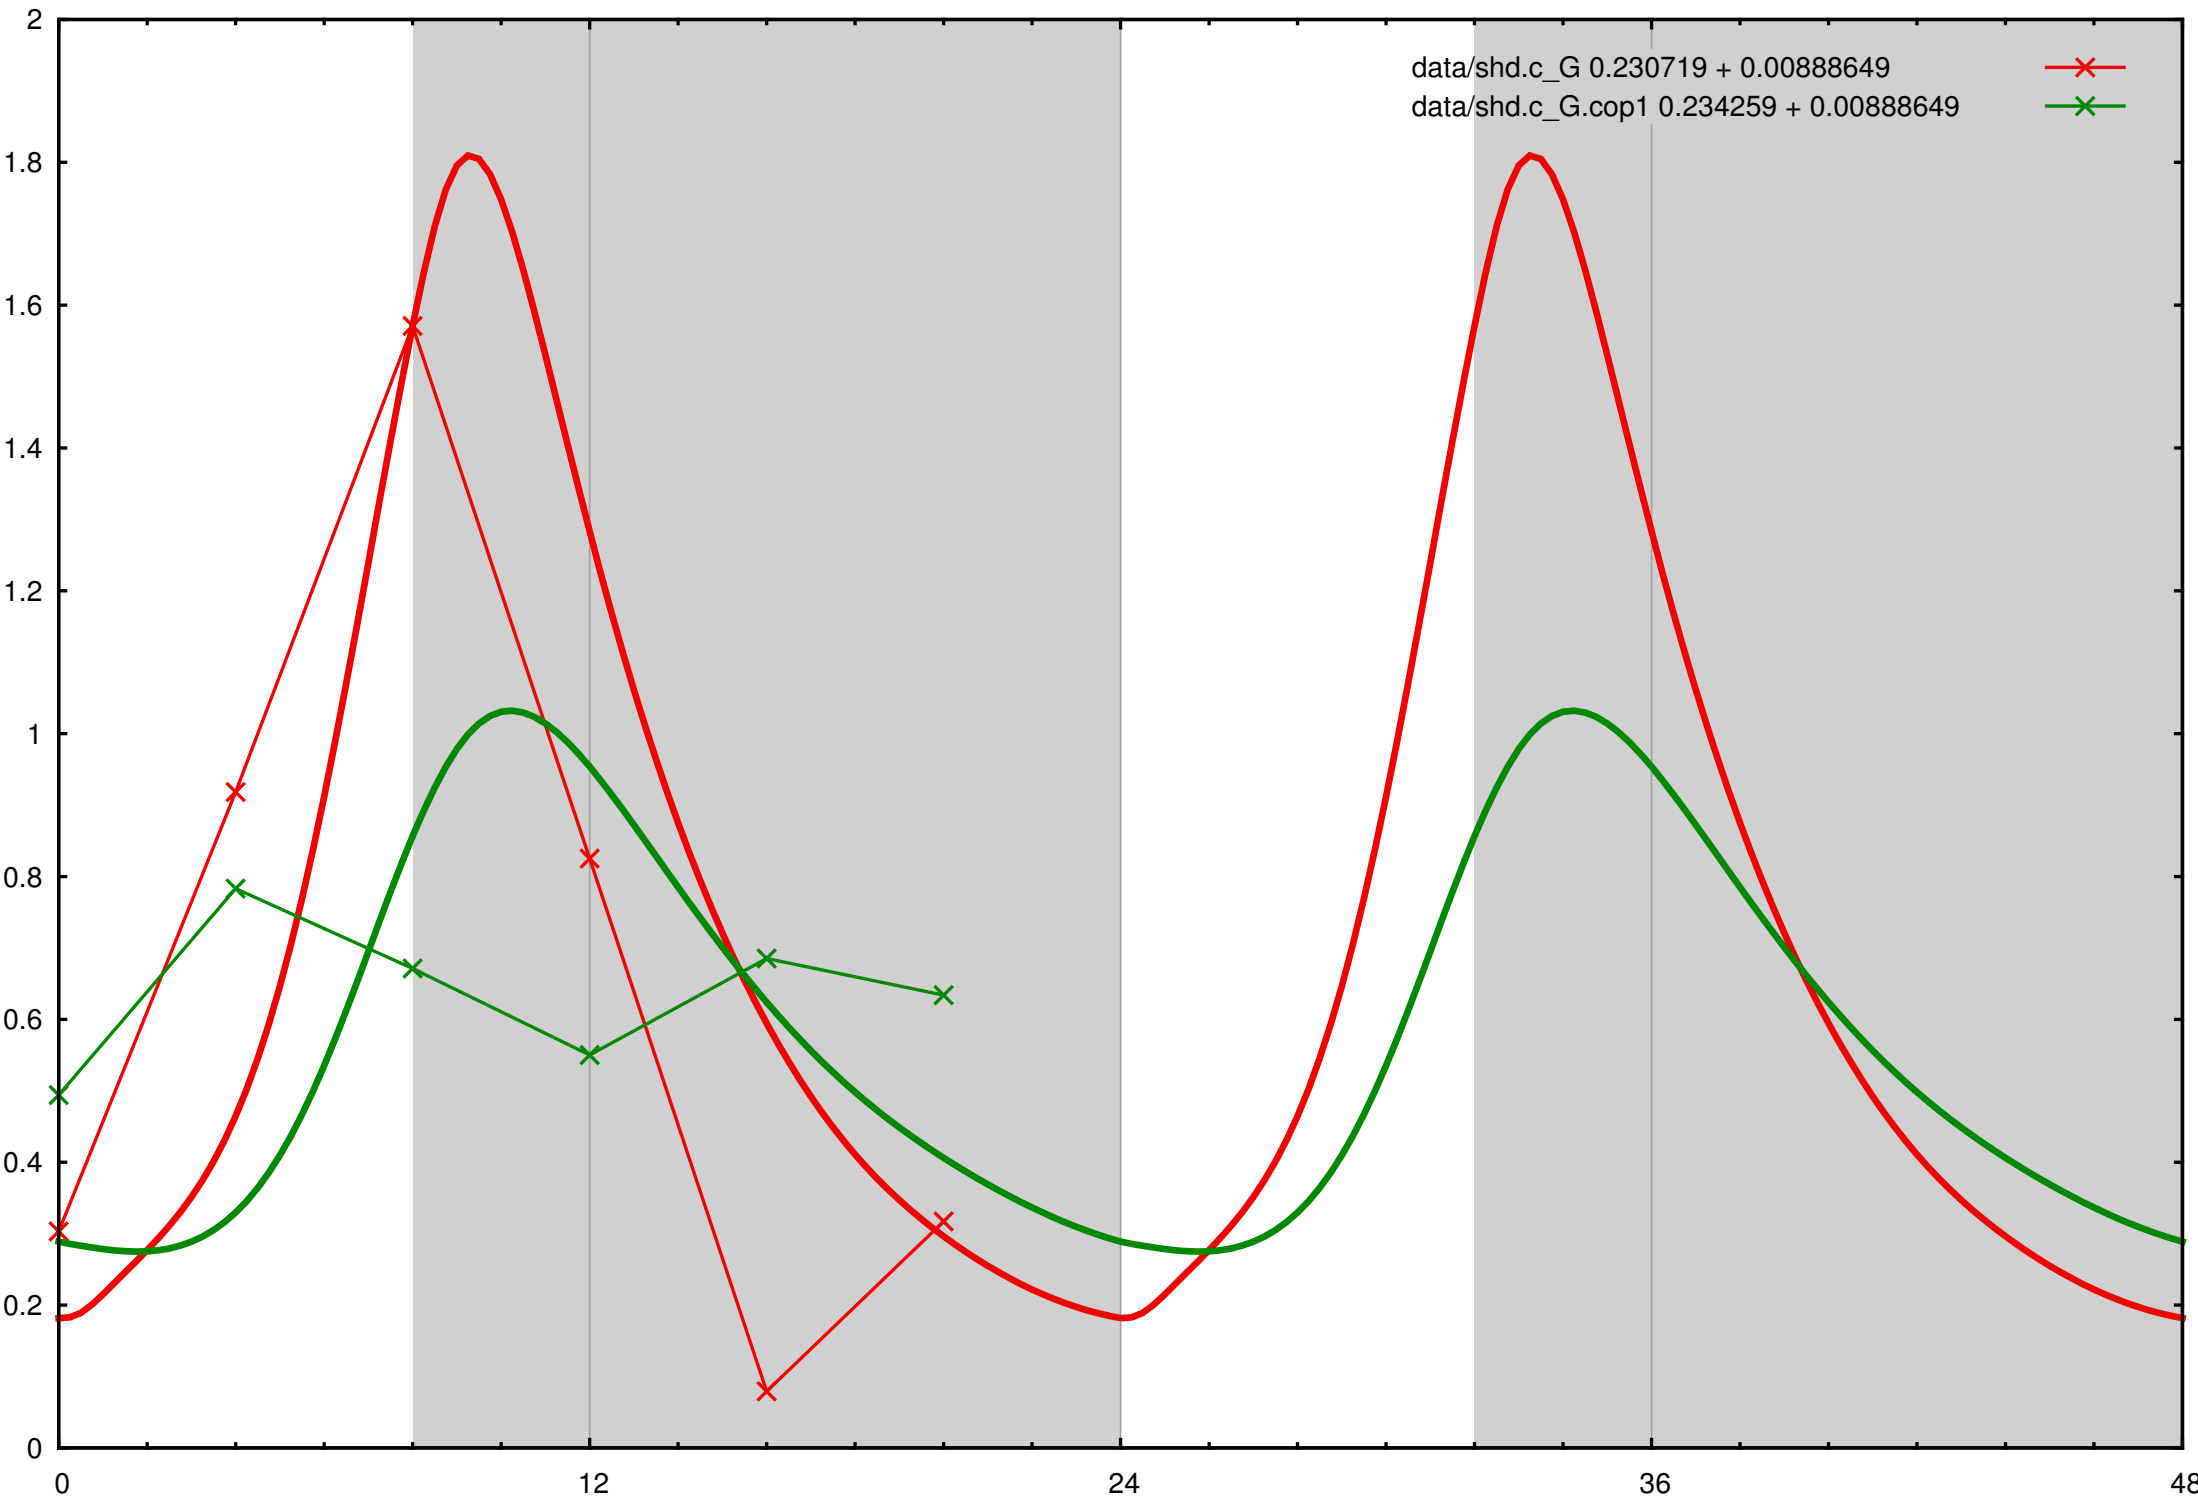

Scale group 79, scost 0.171555

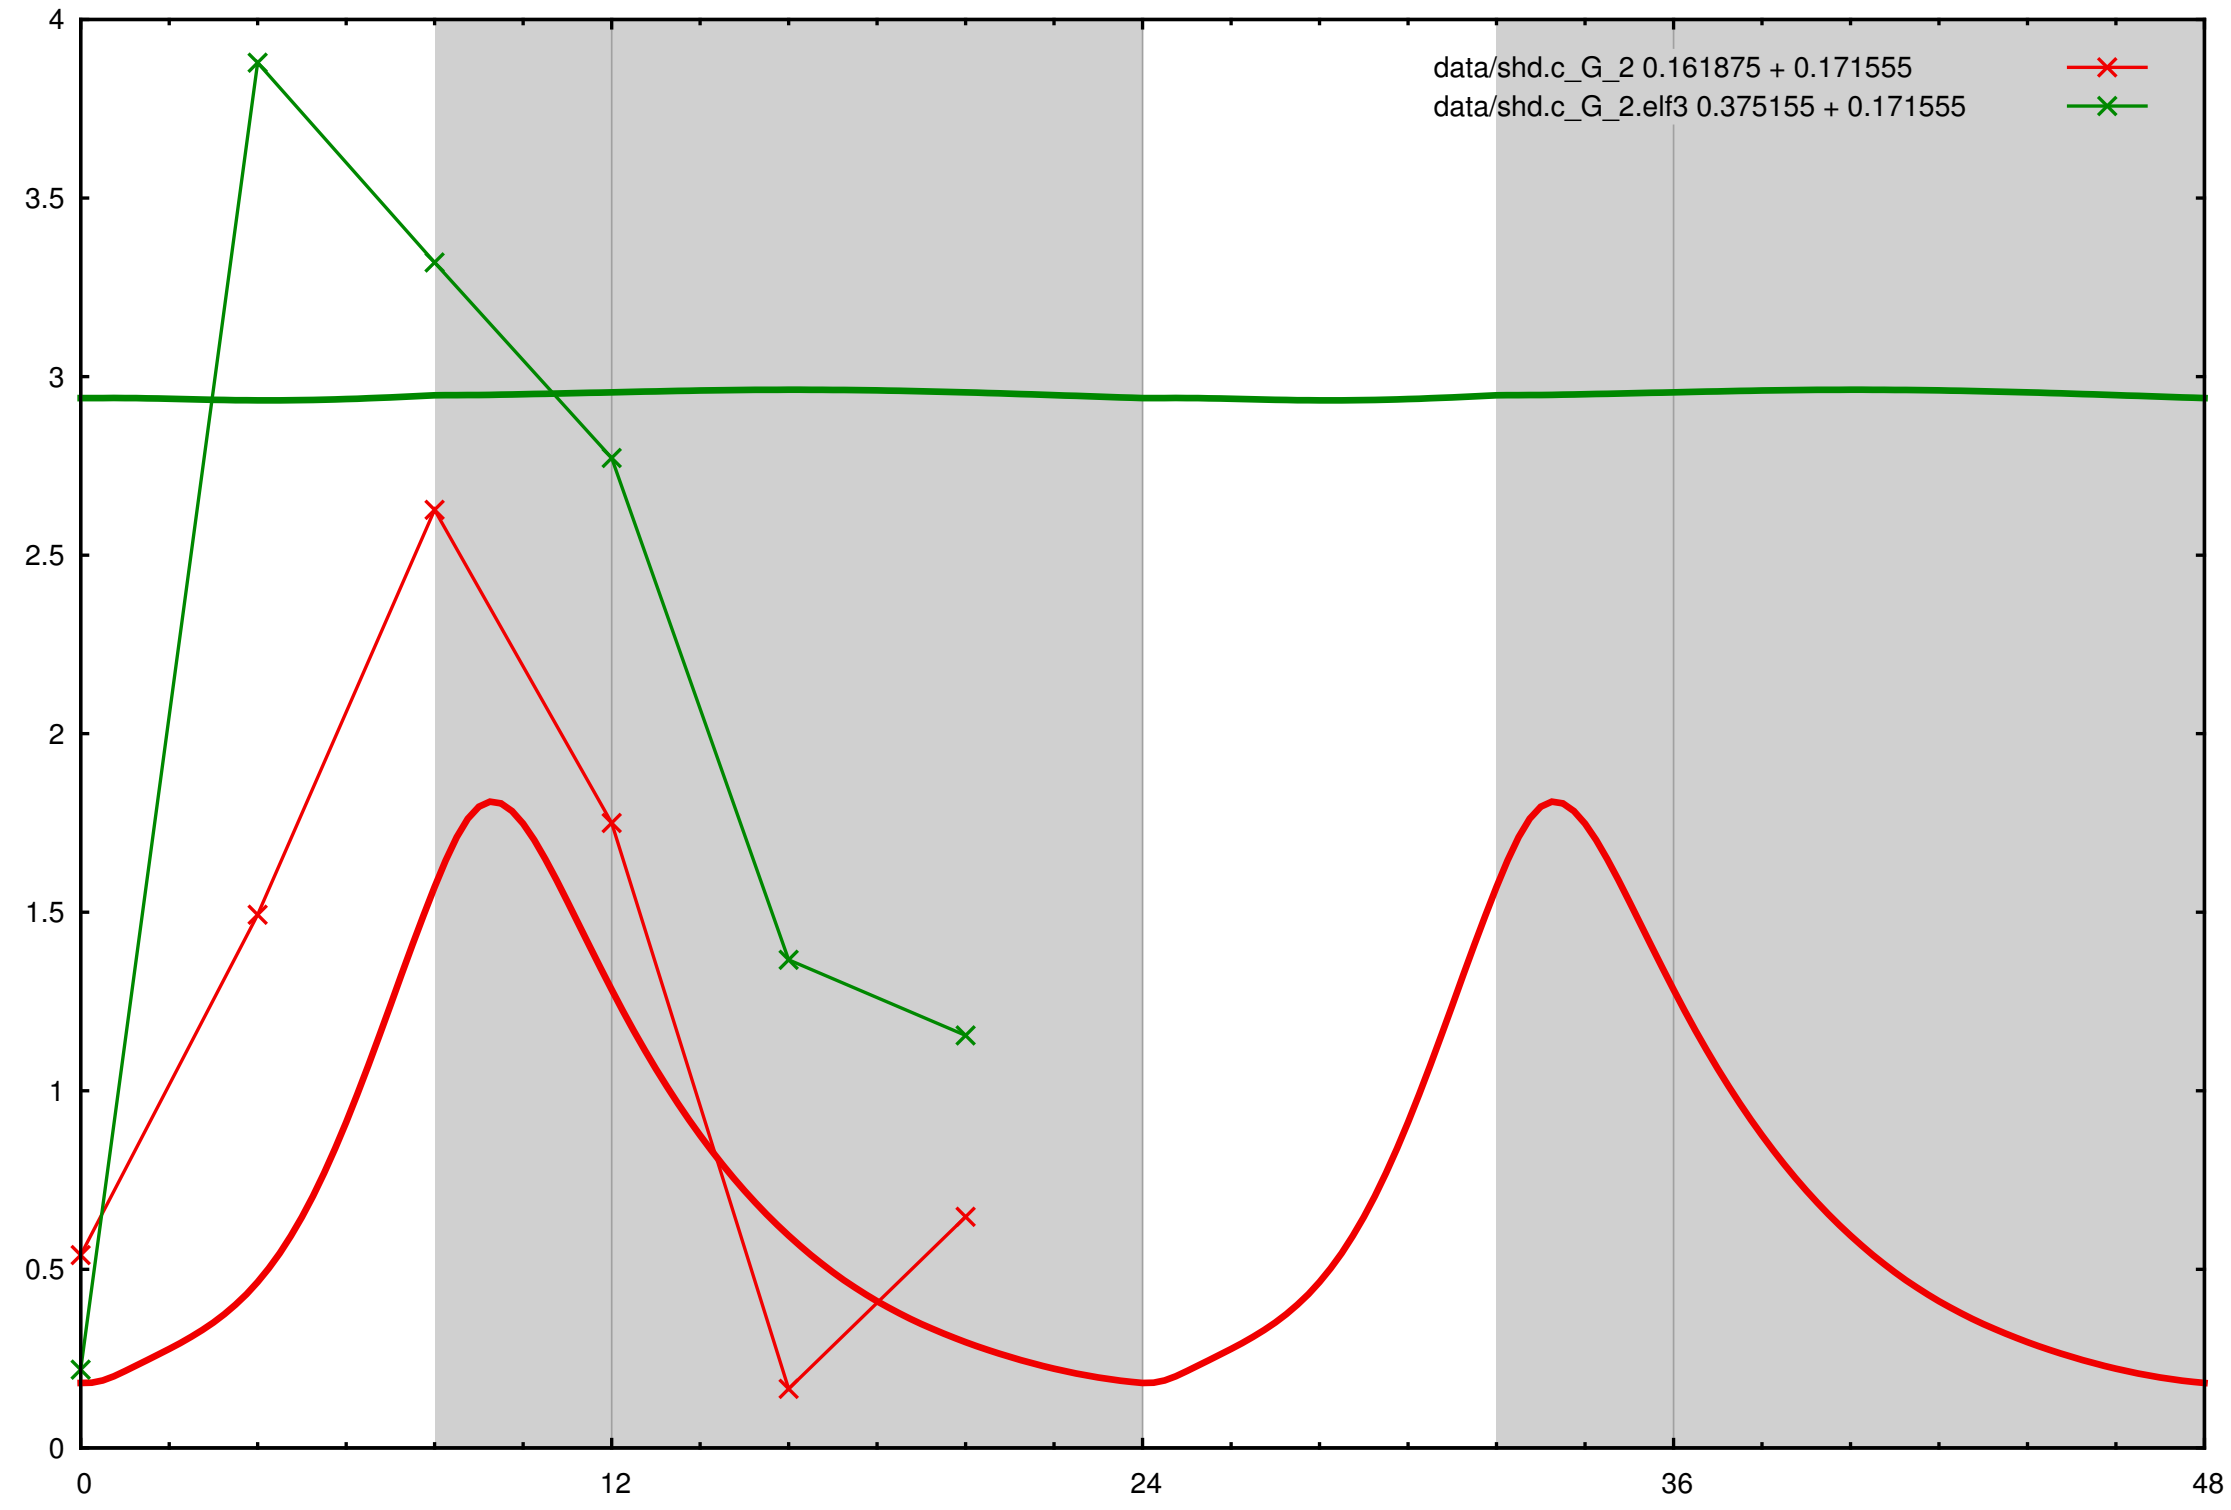

Scale group 80, scost 0.3806

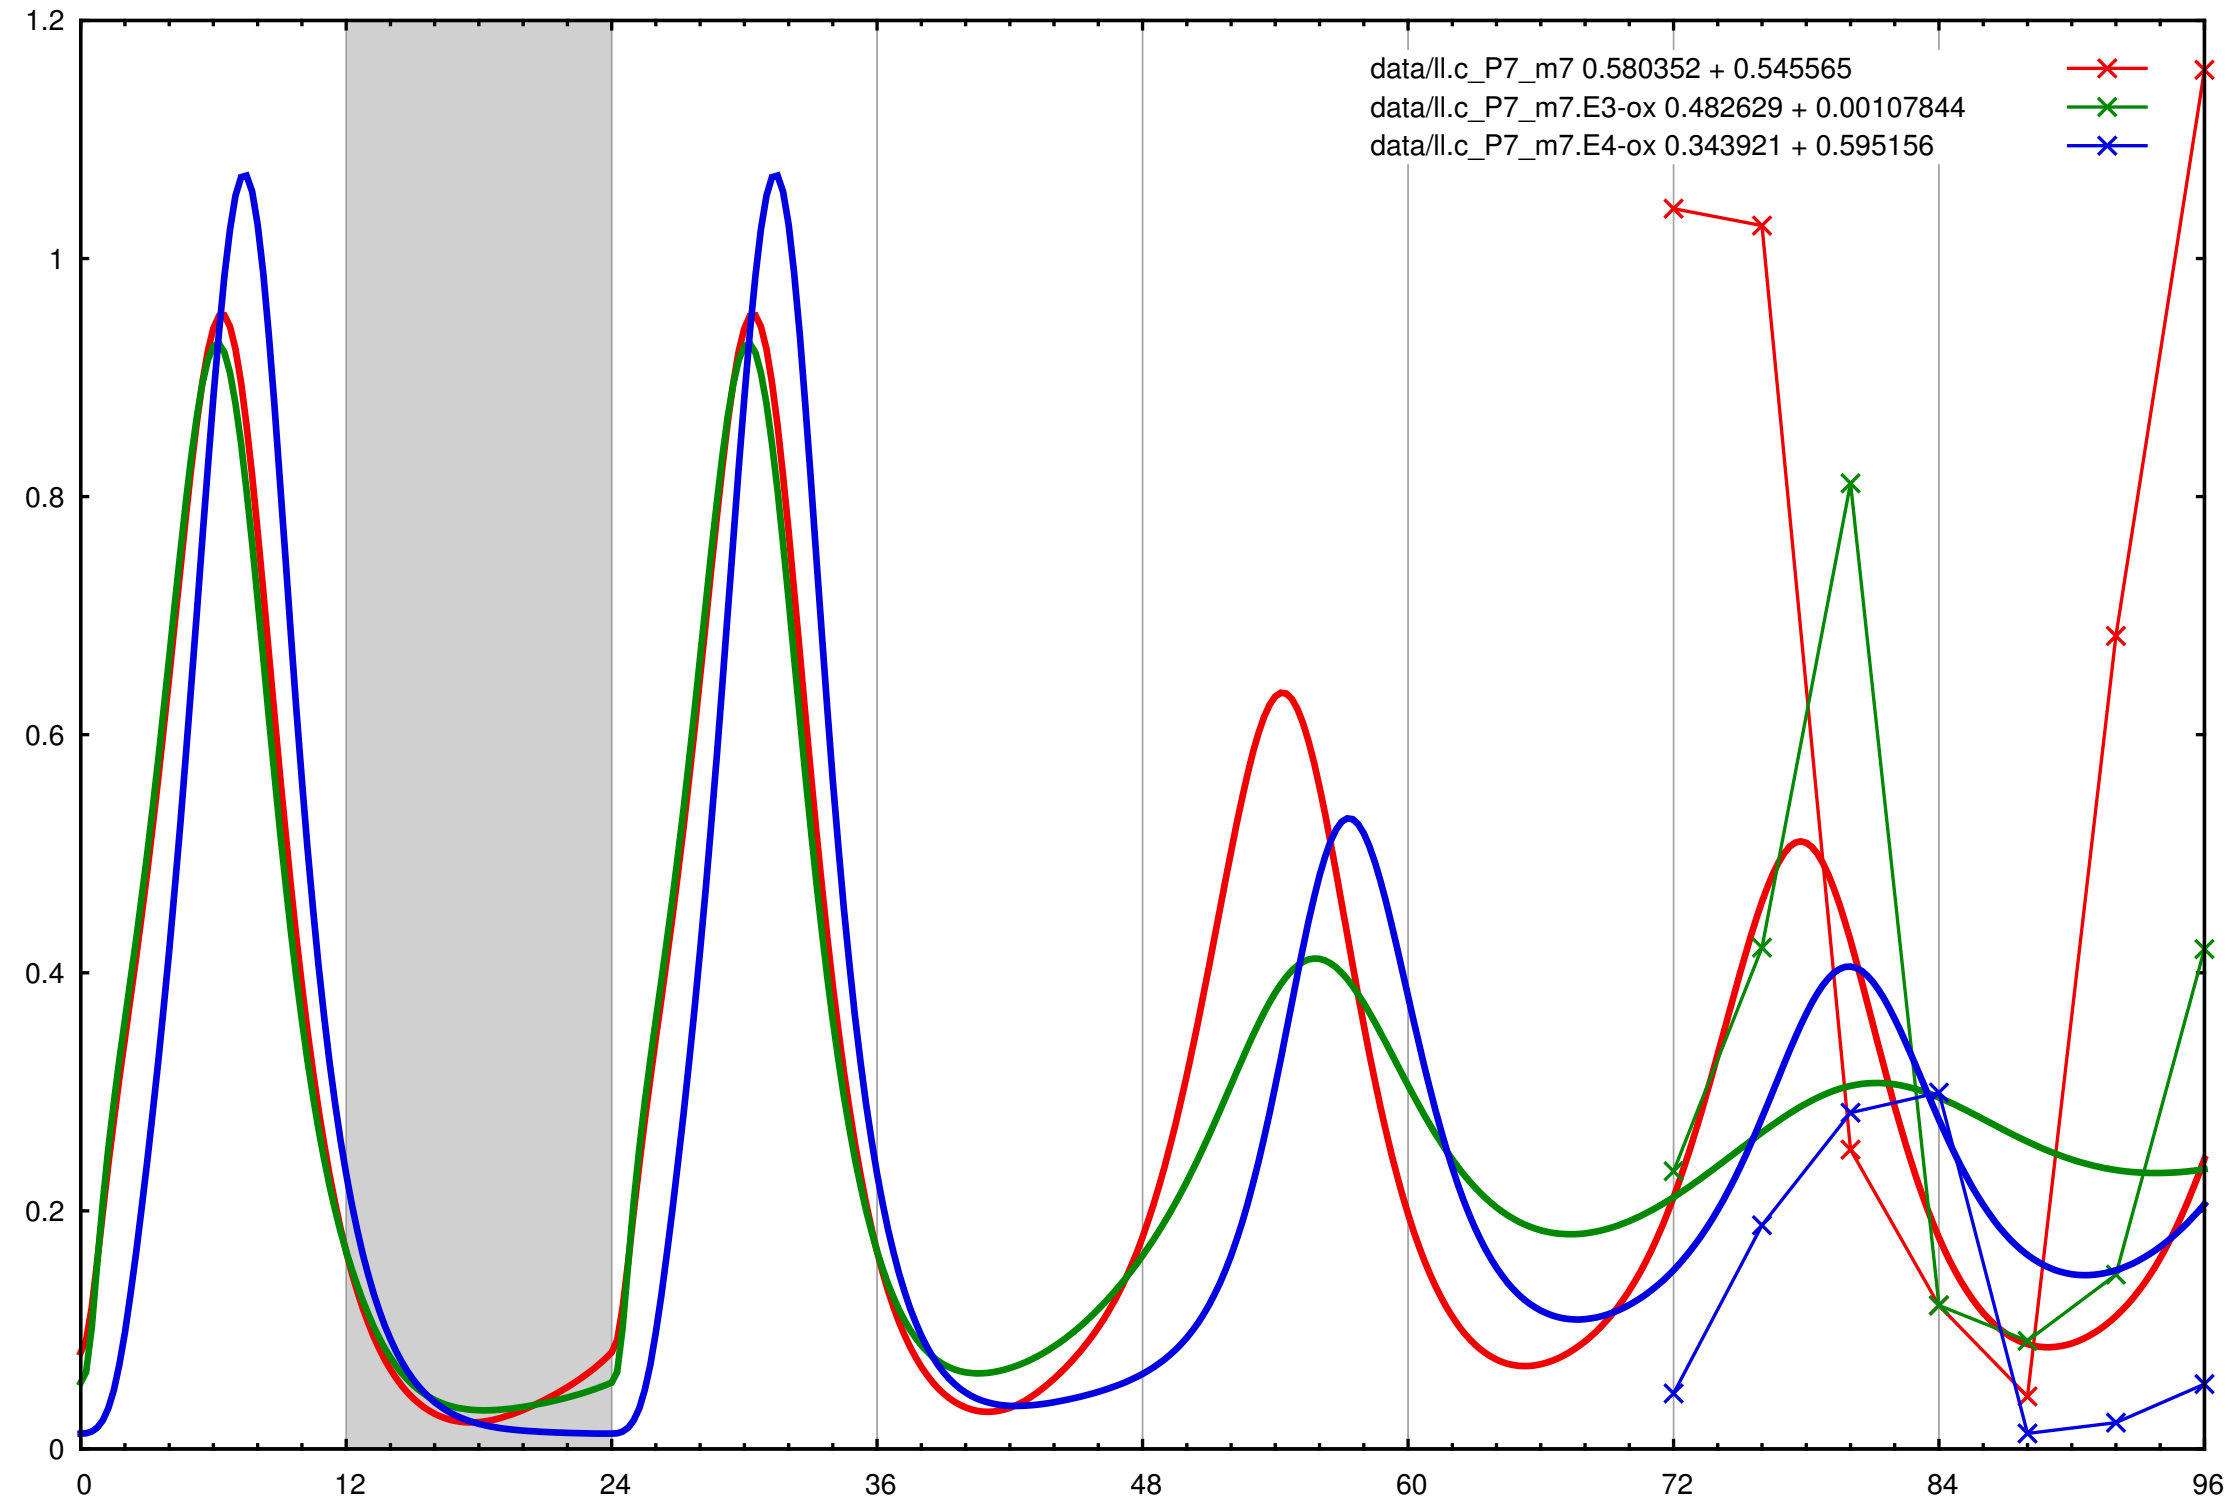



Scale group 81, scost 0.850856

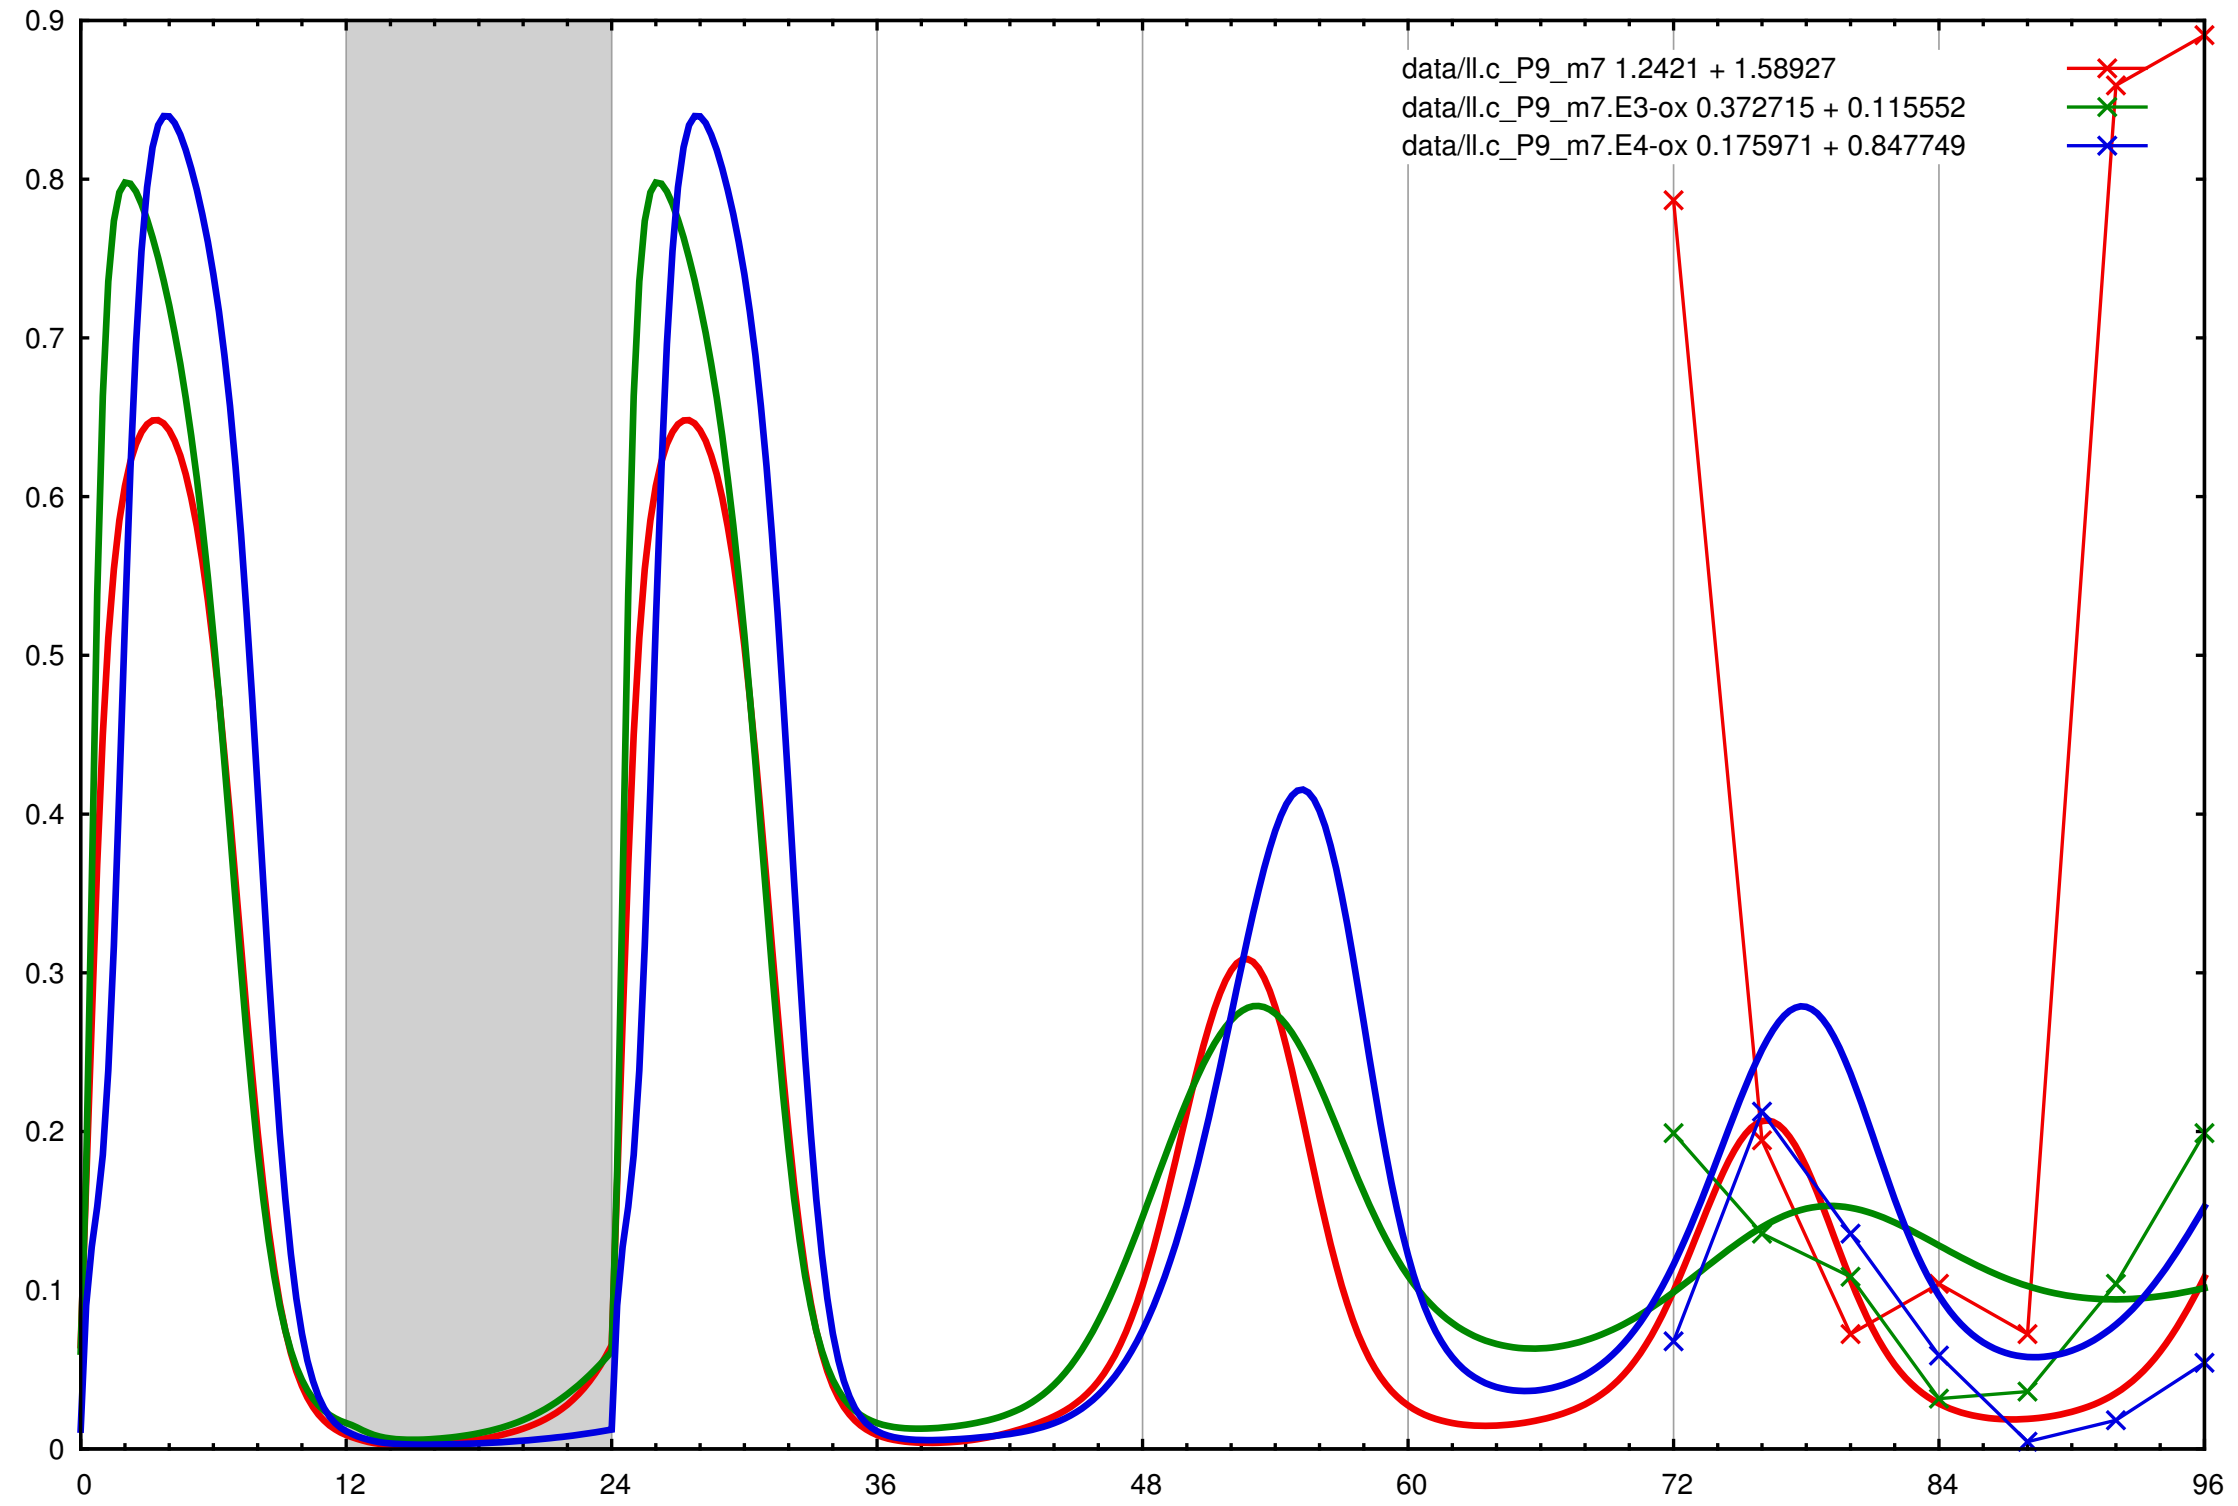

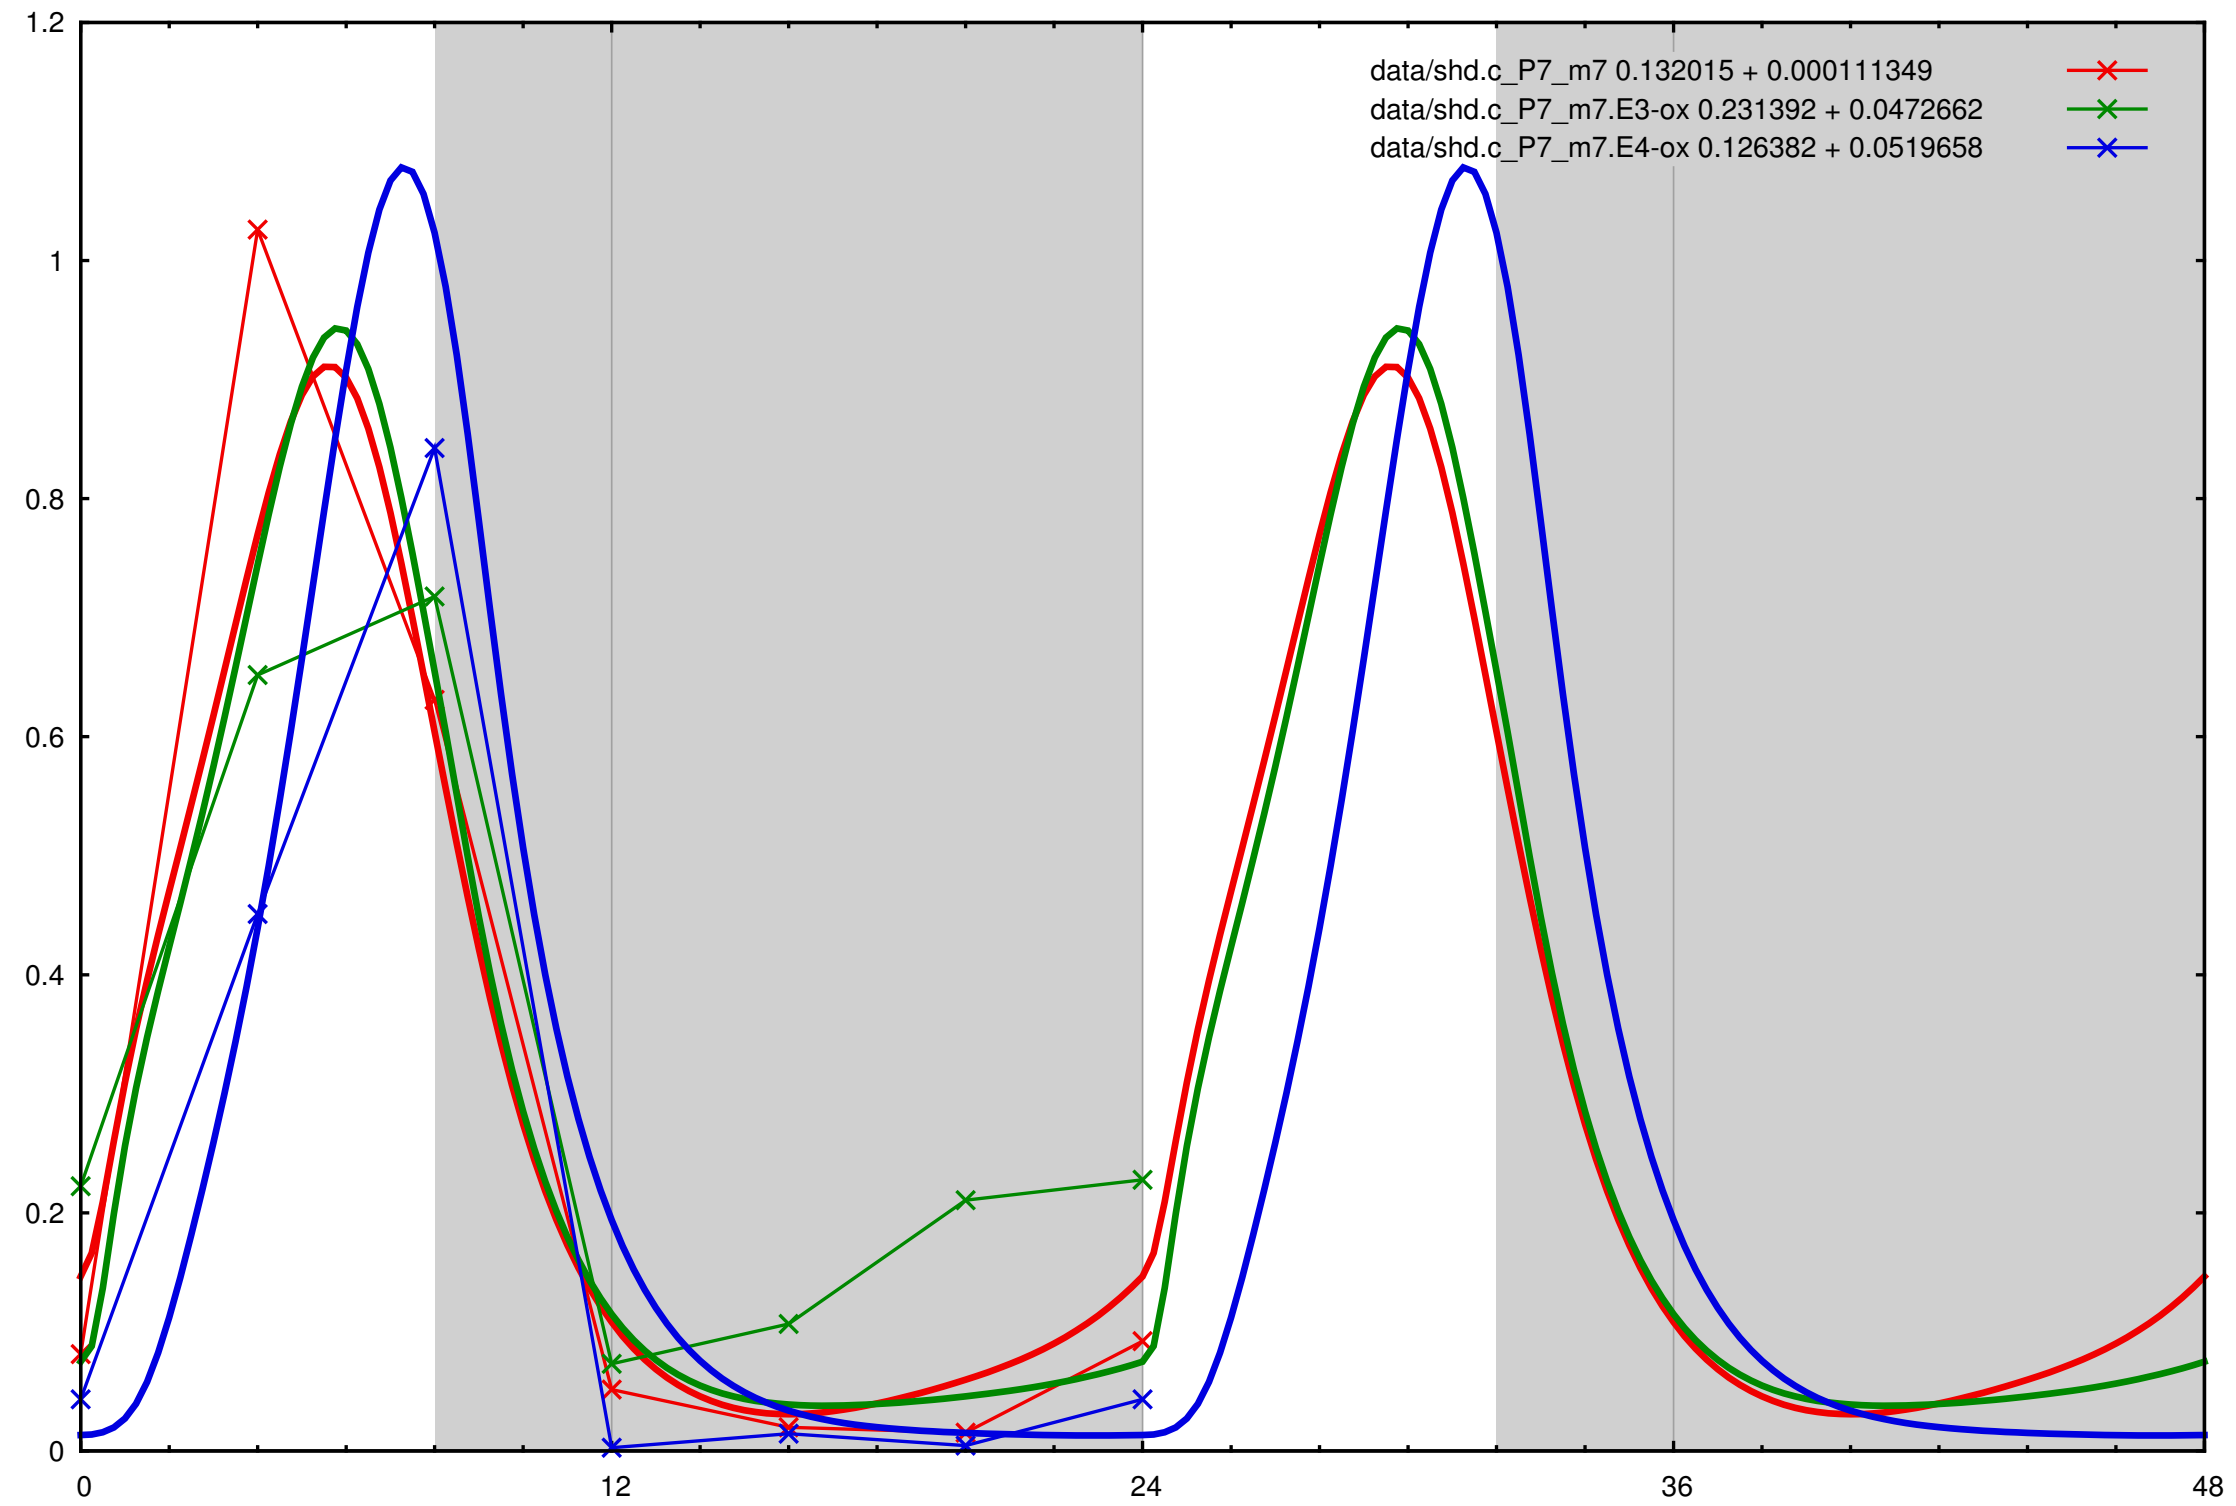

Scale group 83, scost 0.0856738

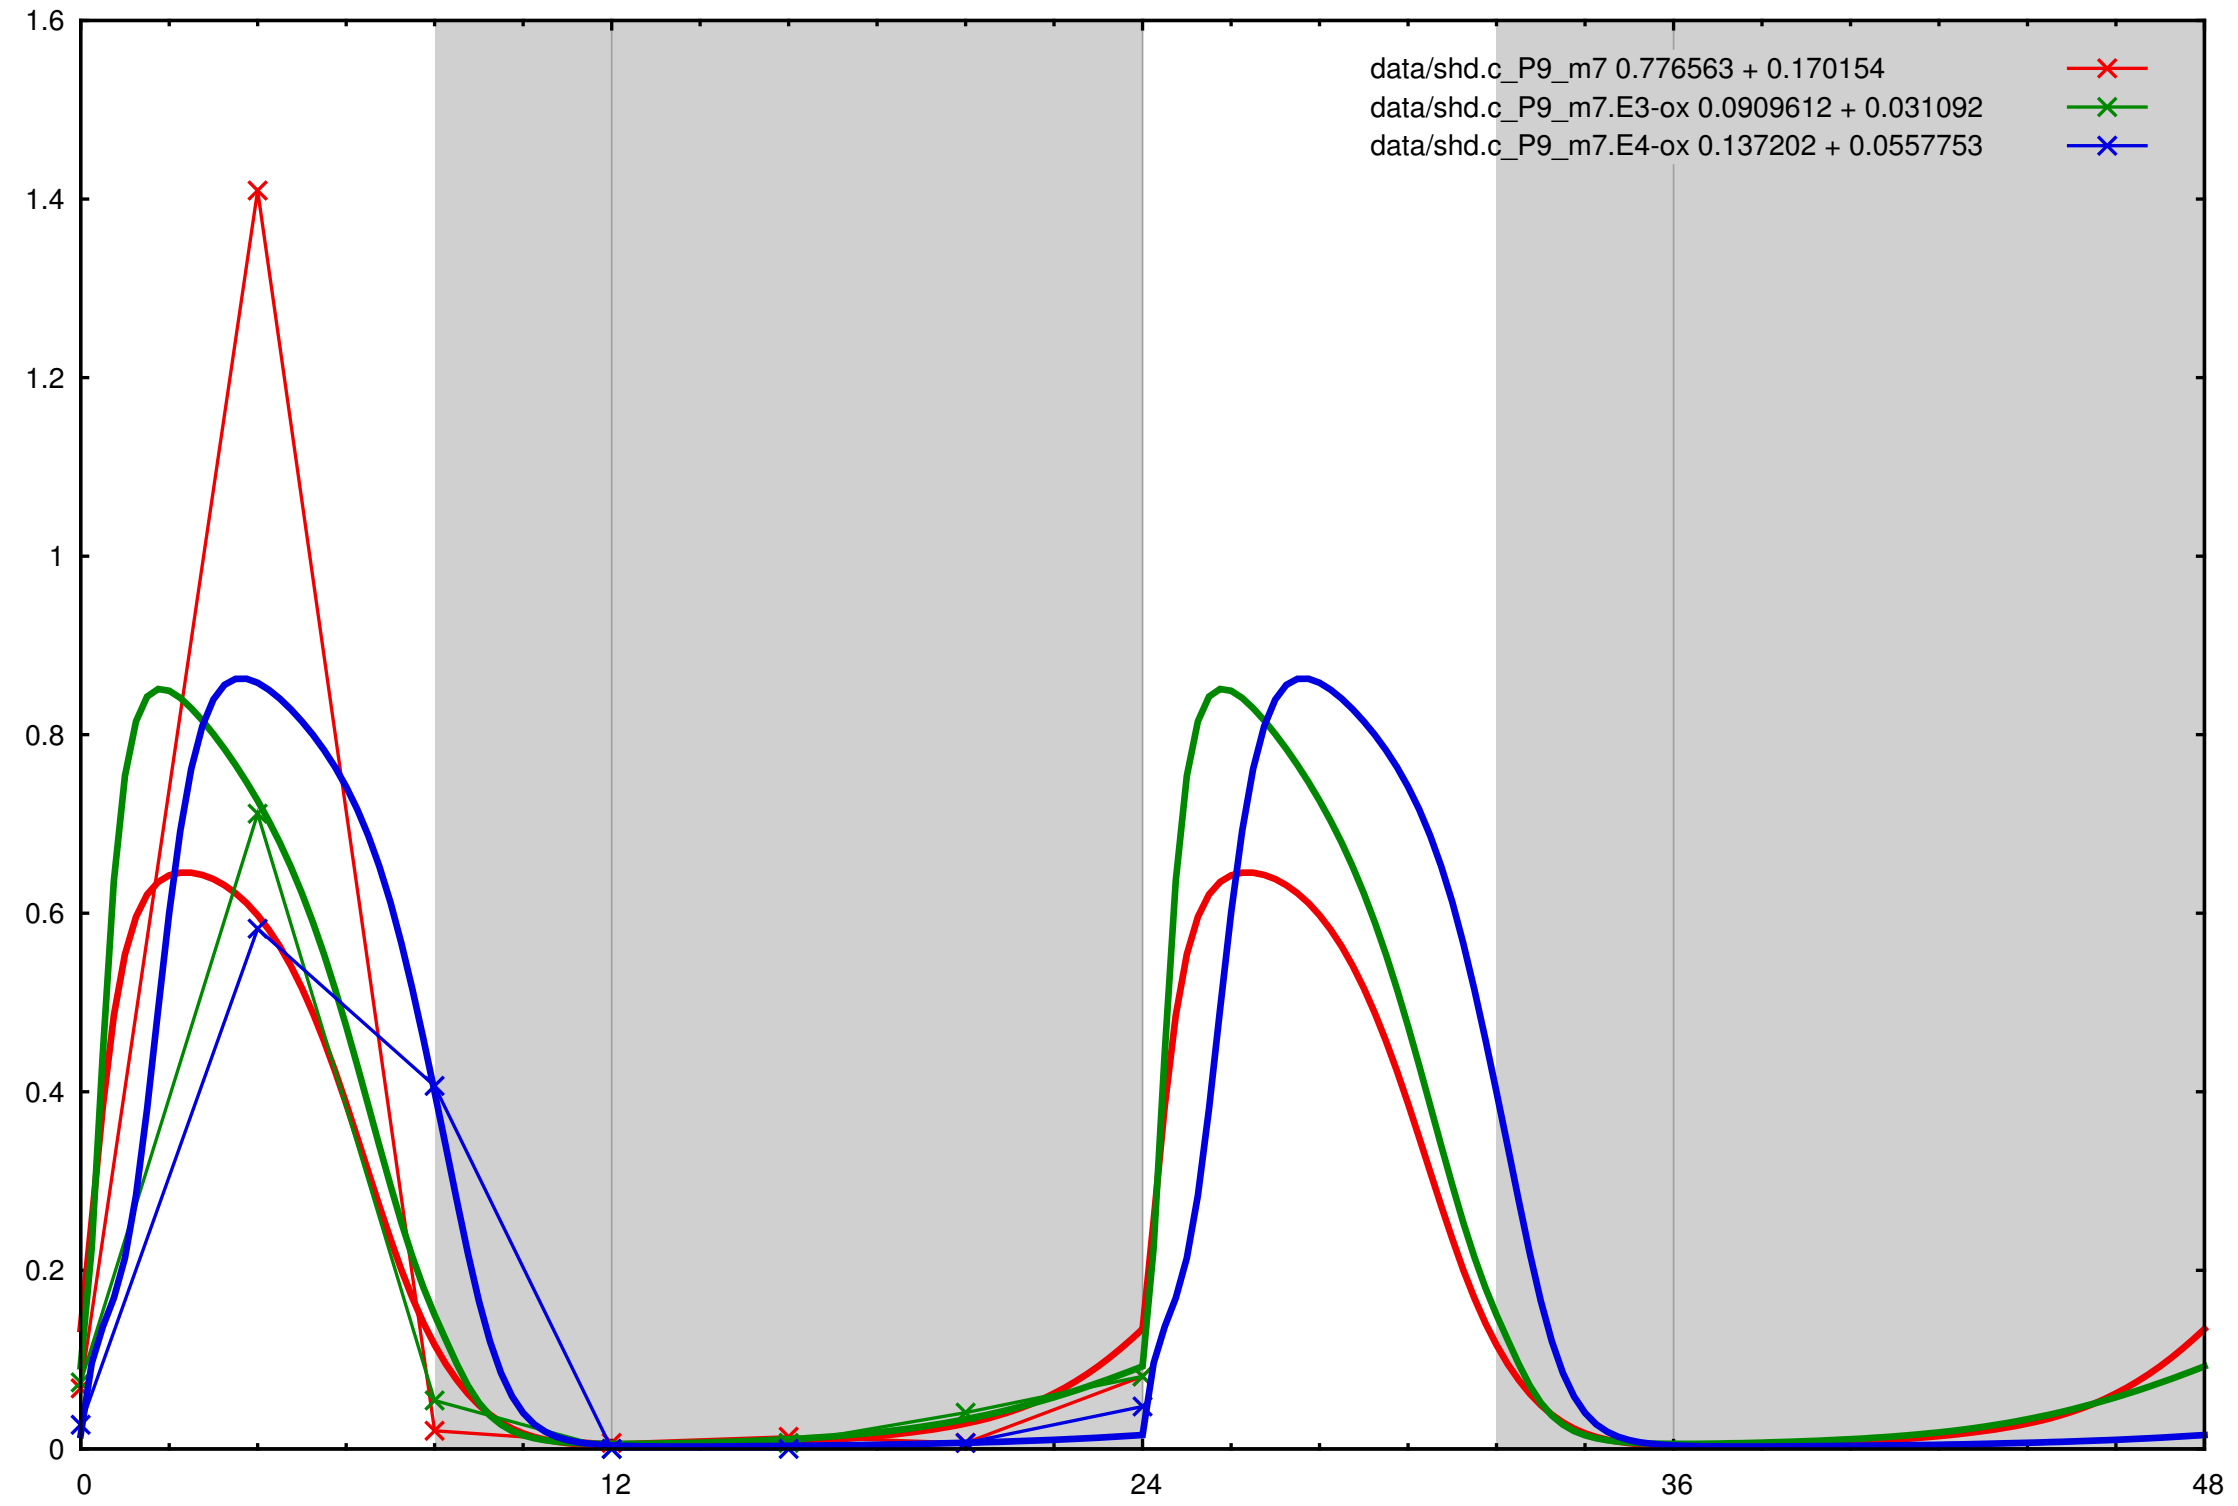

Scale group 84, scost 0.0710713

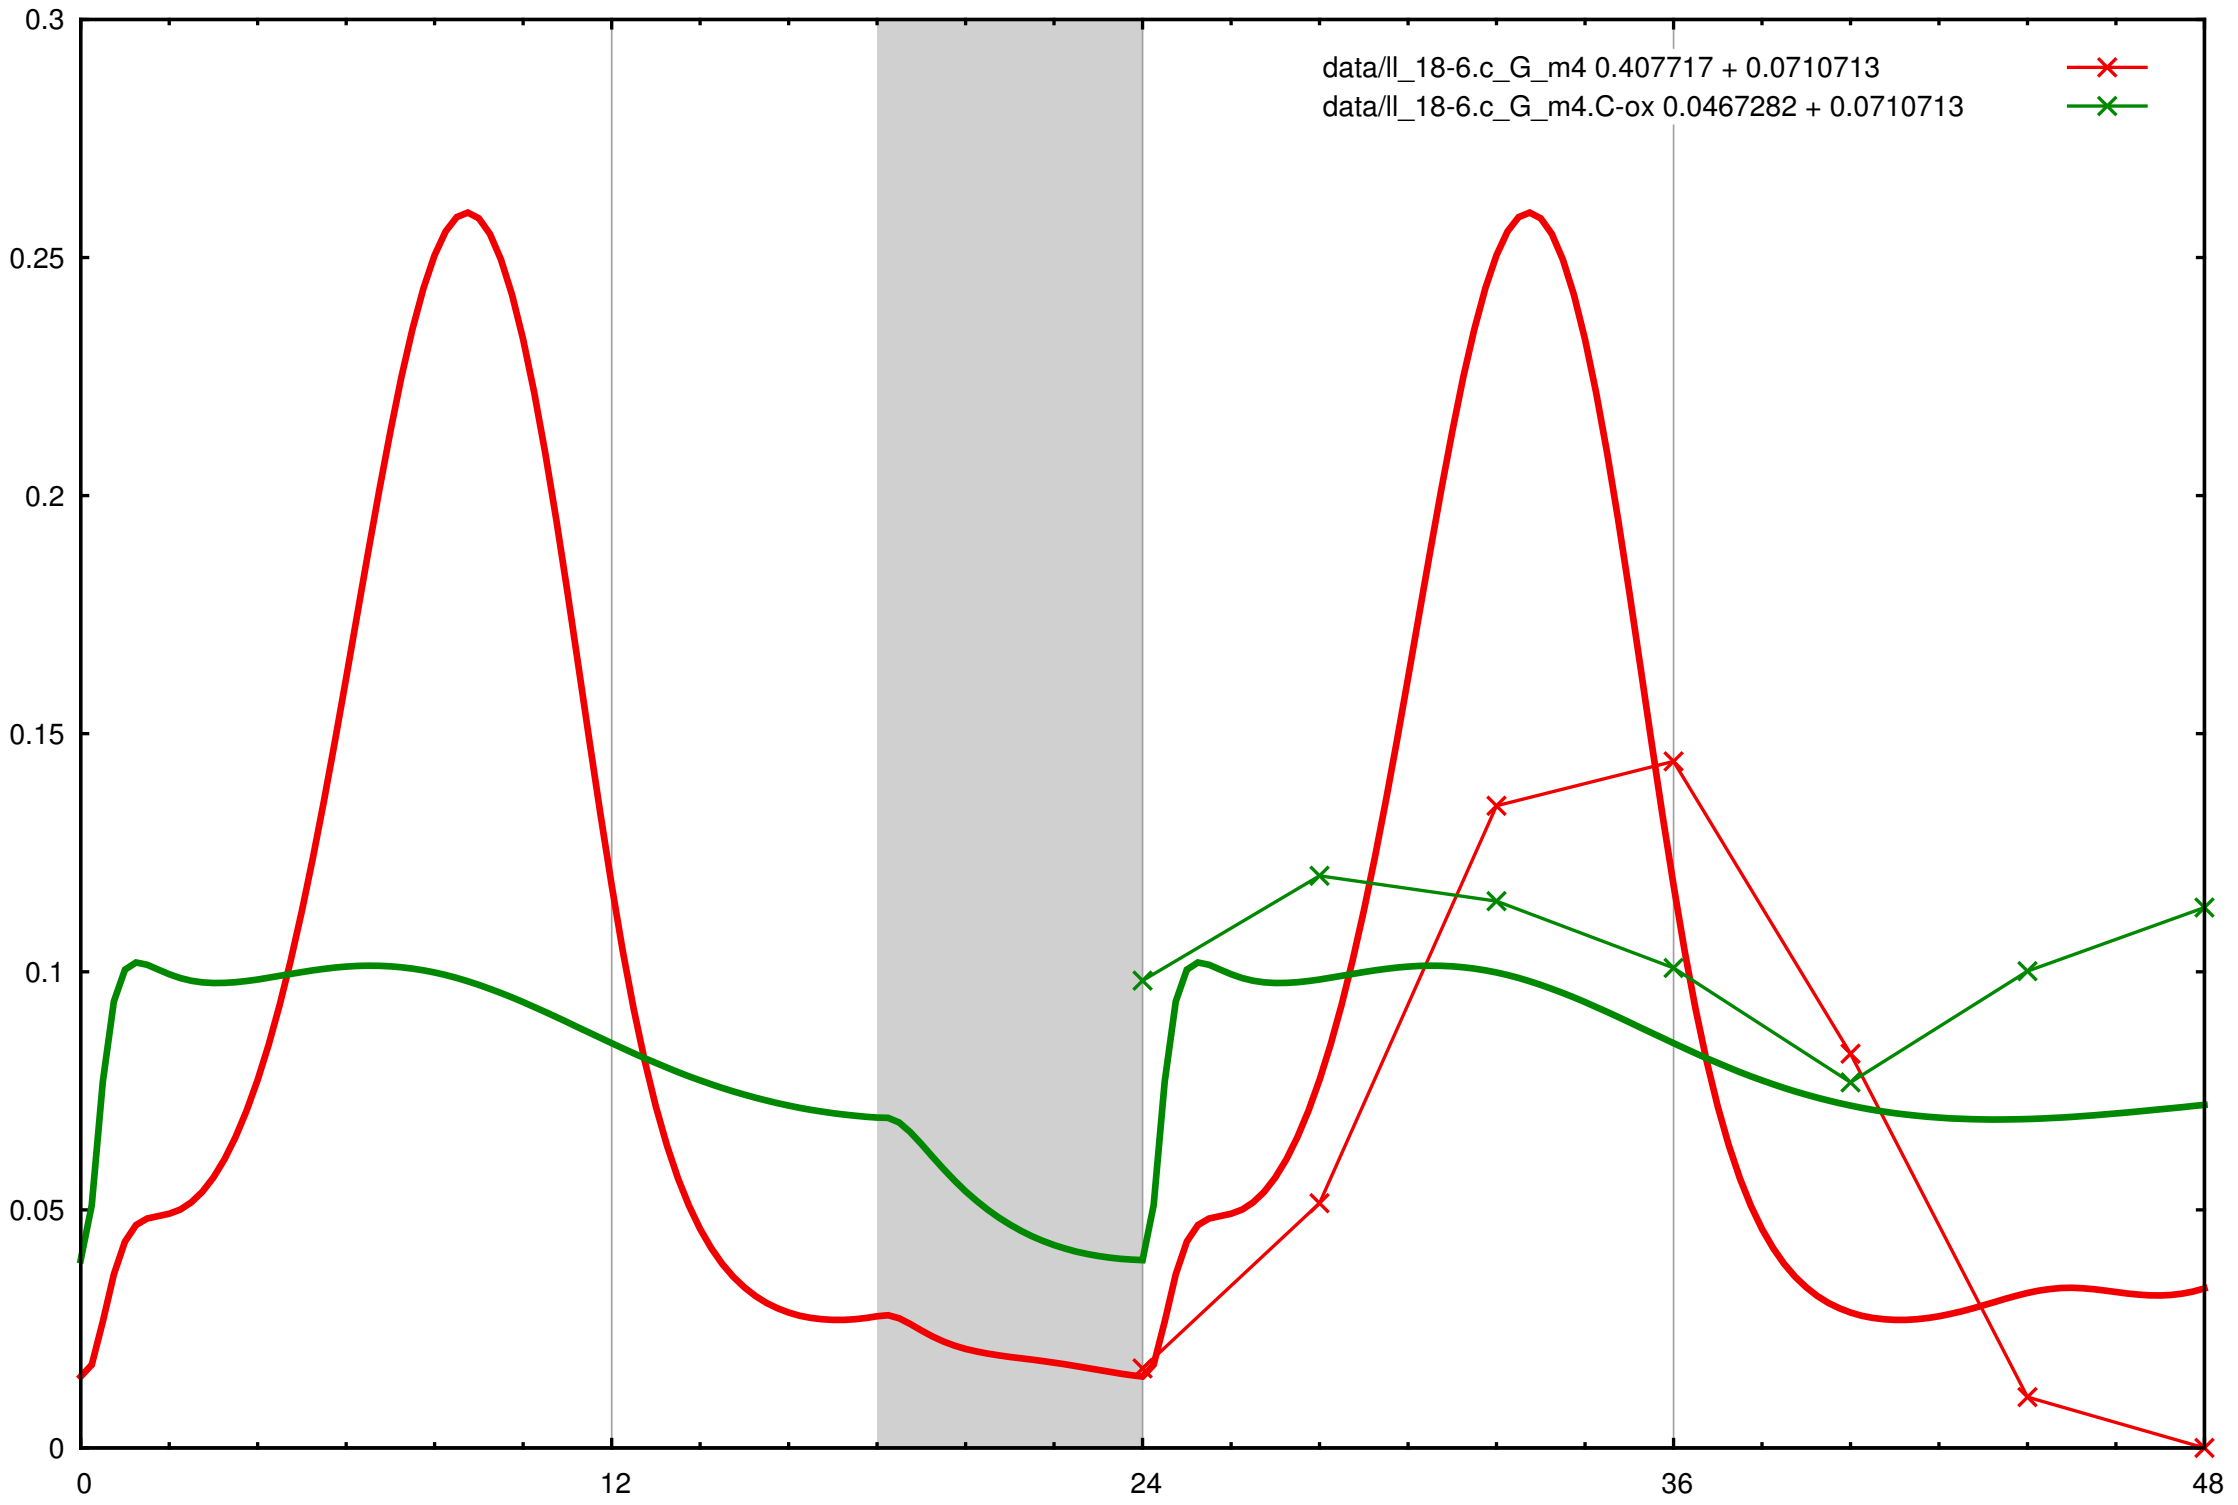

Scale group 85, scost 0.0177468

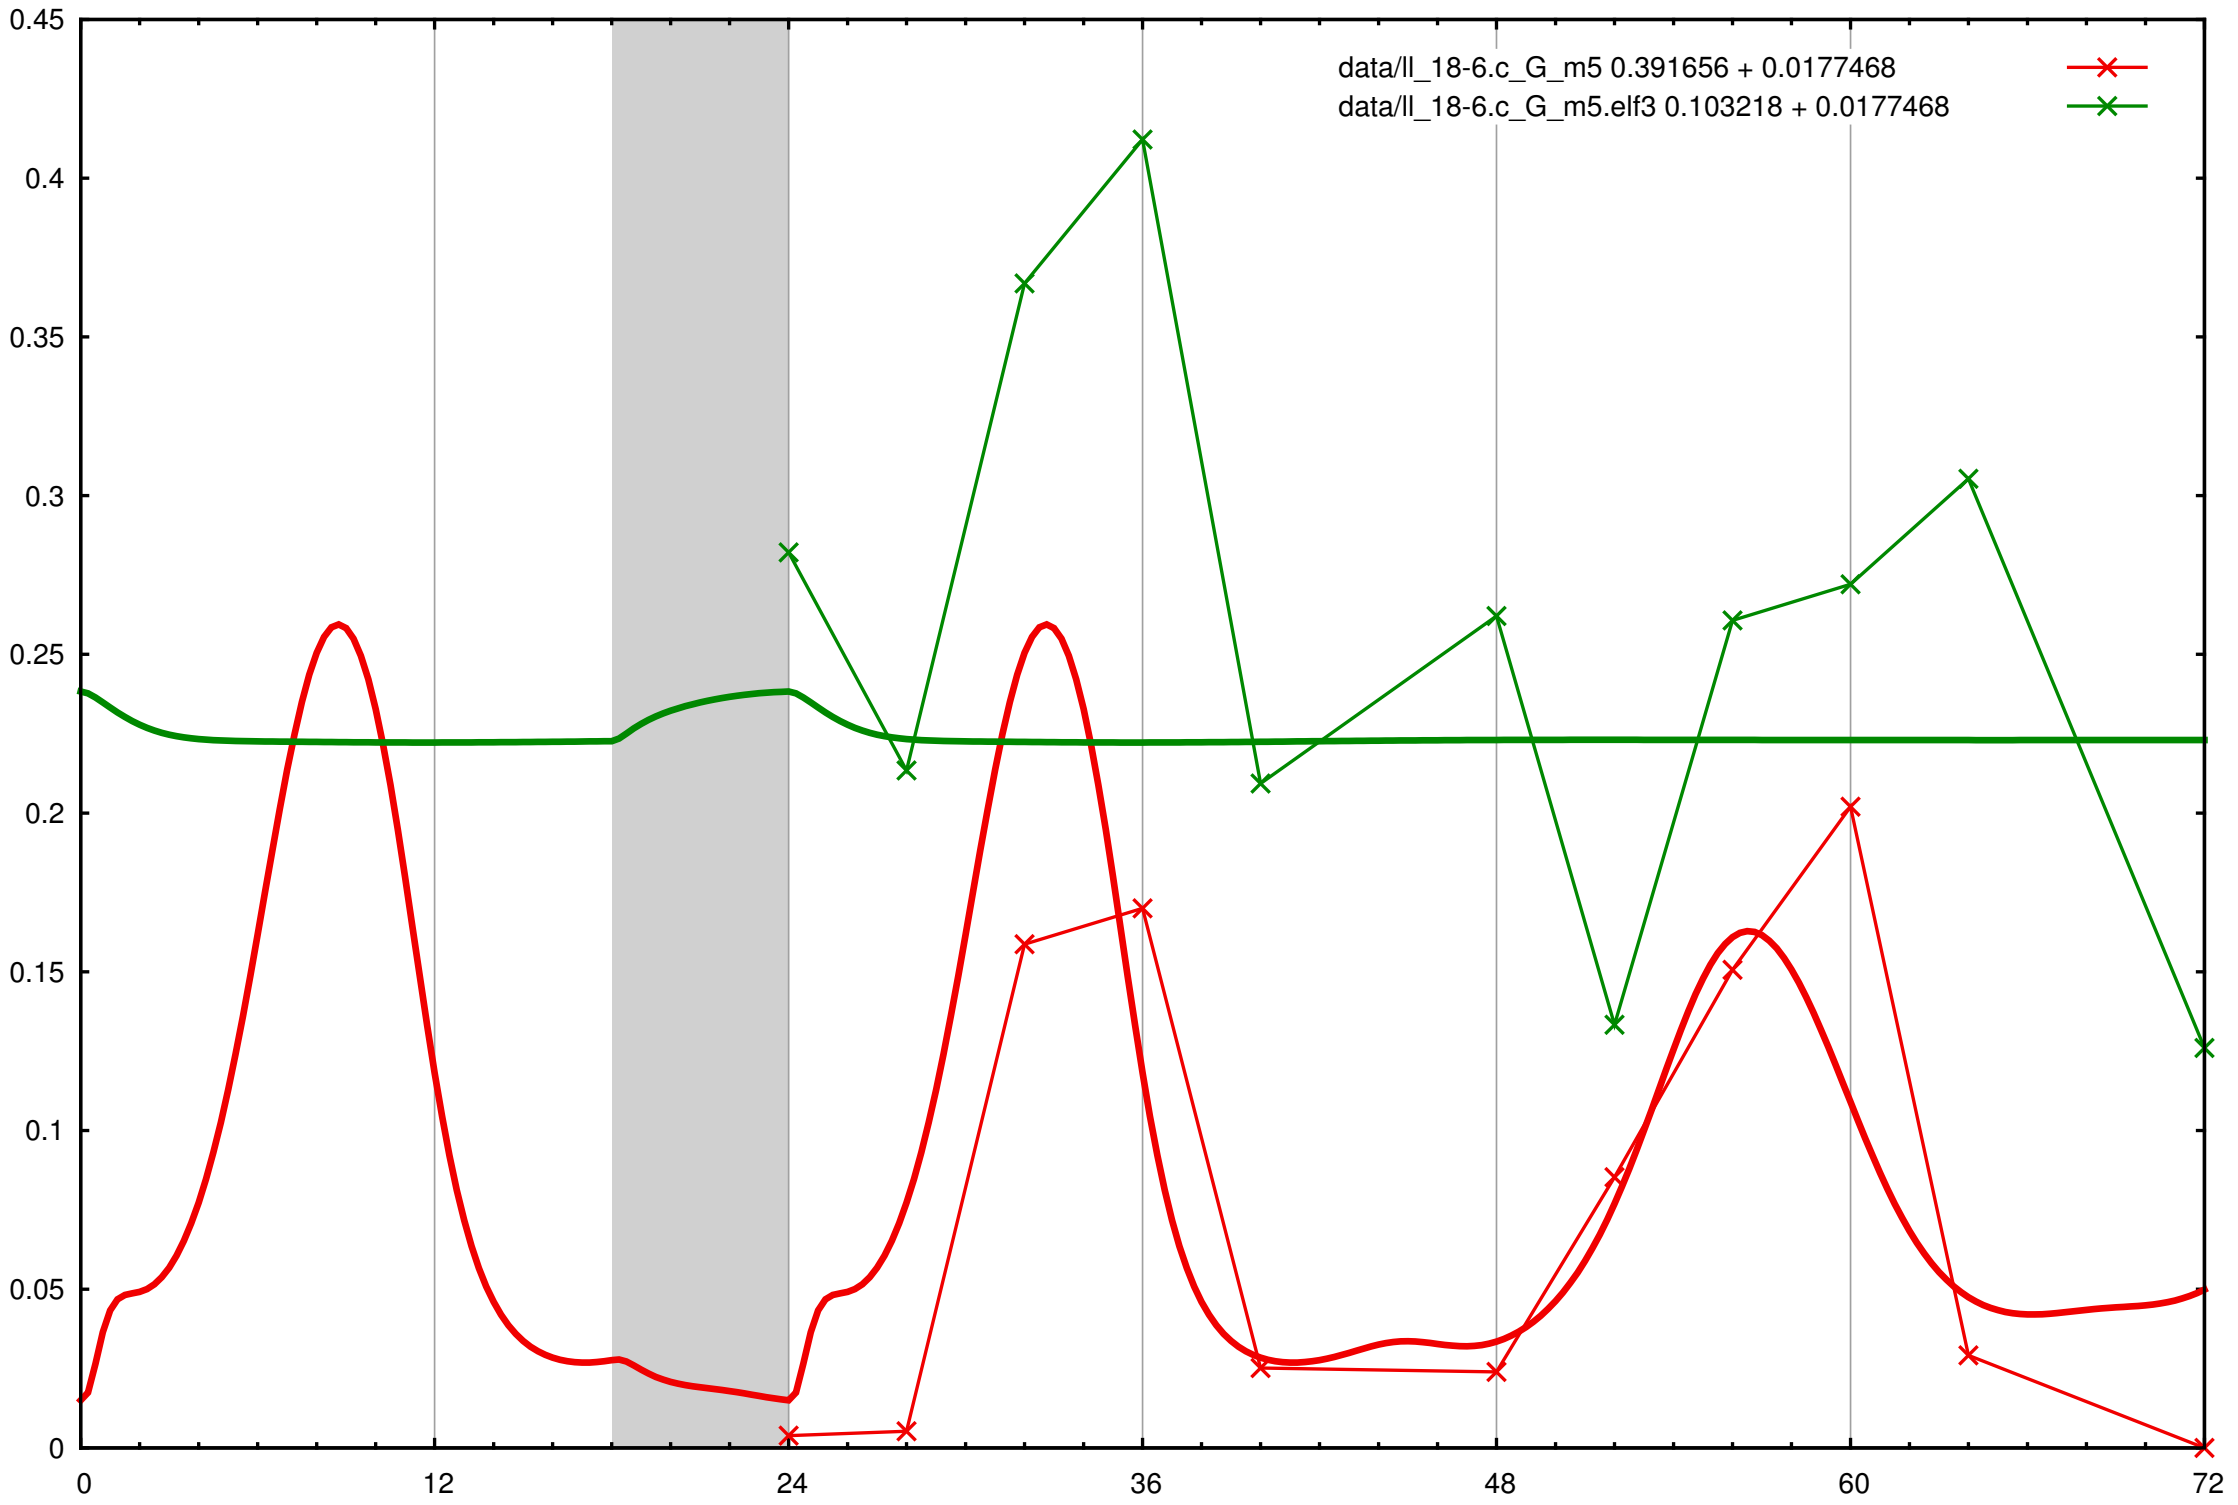

Scale group 86, scost 0.220234

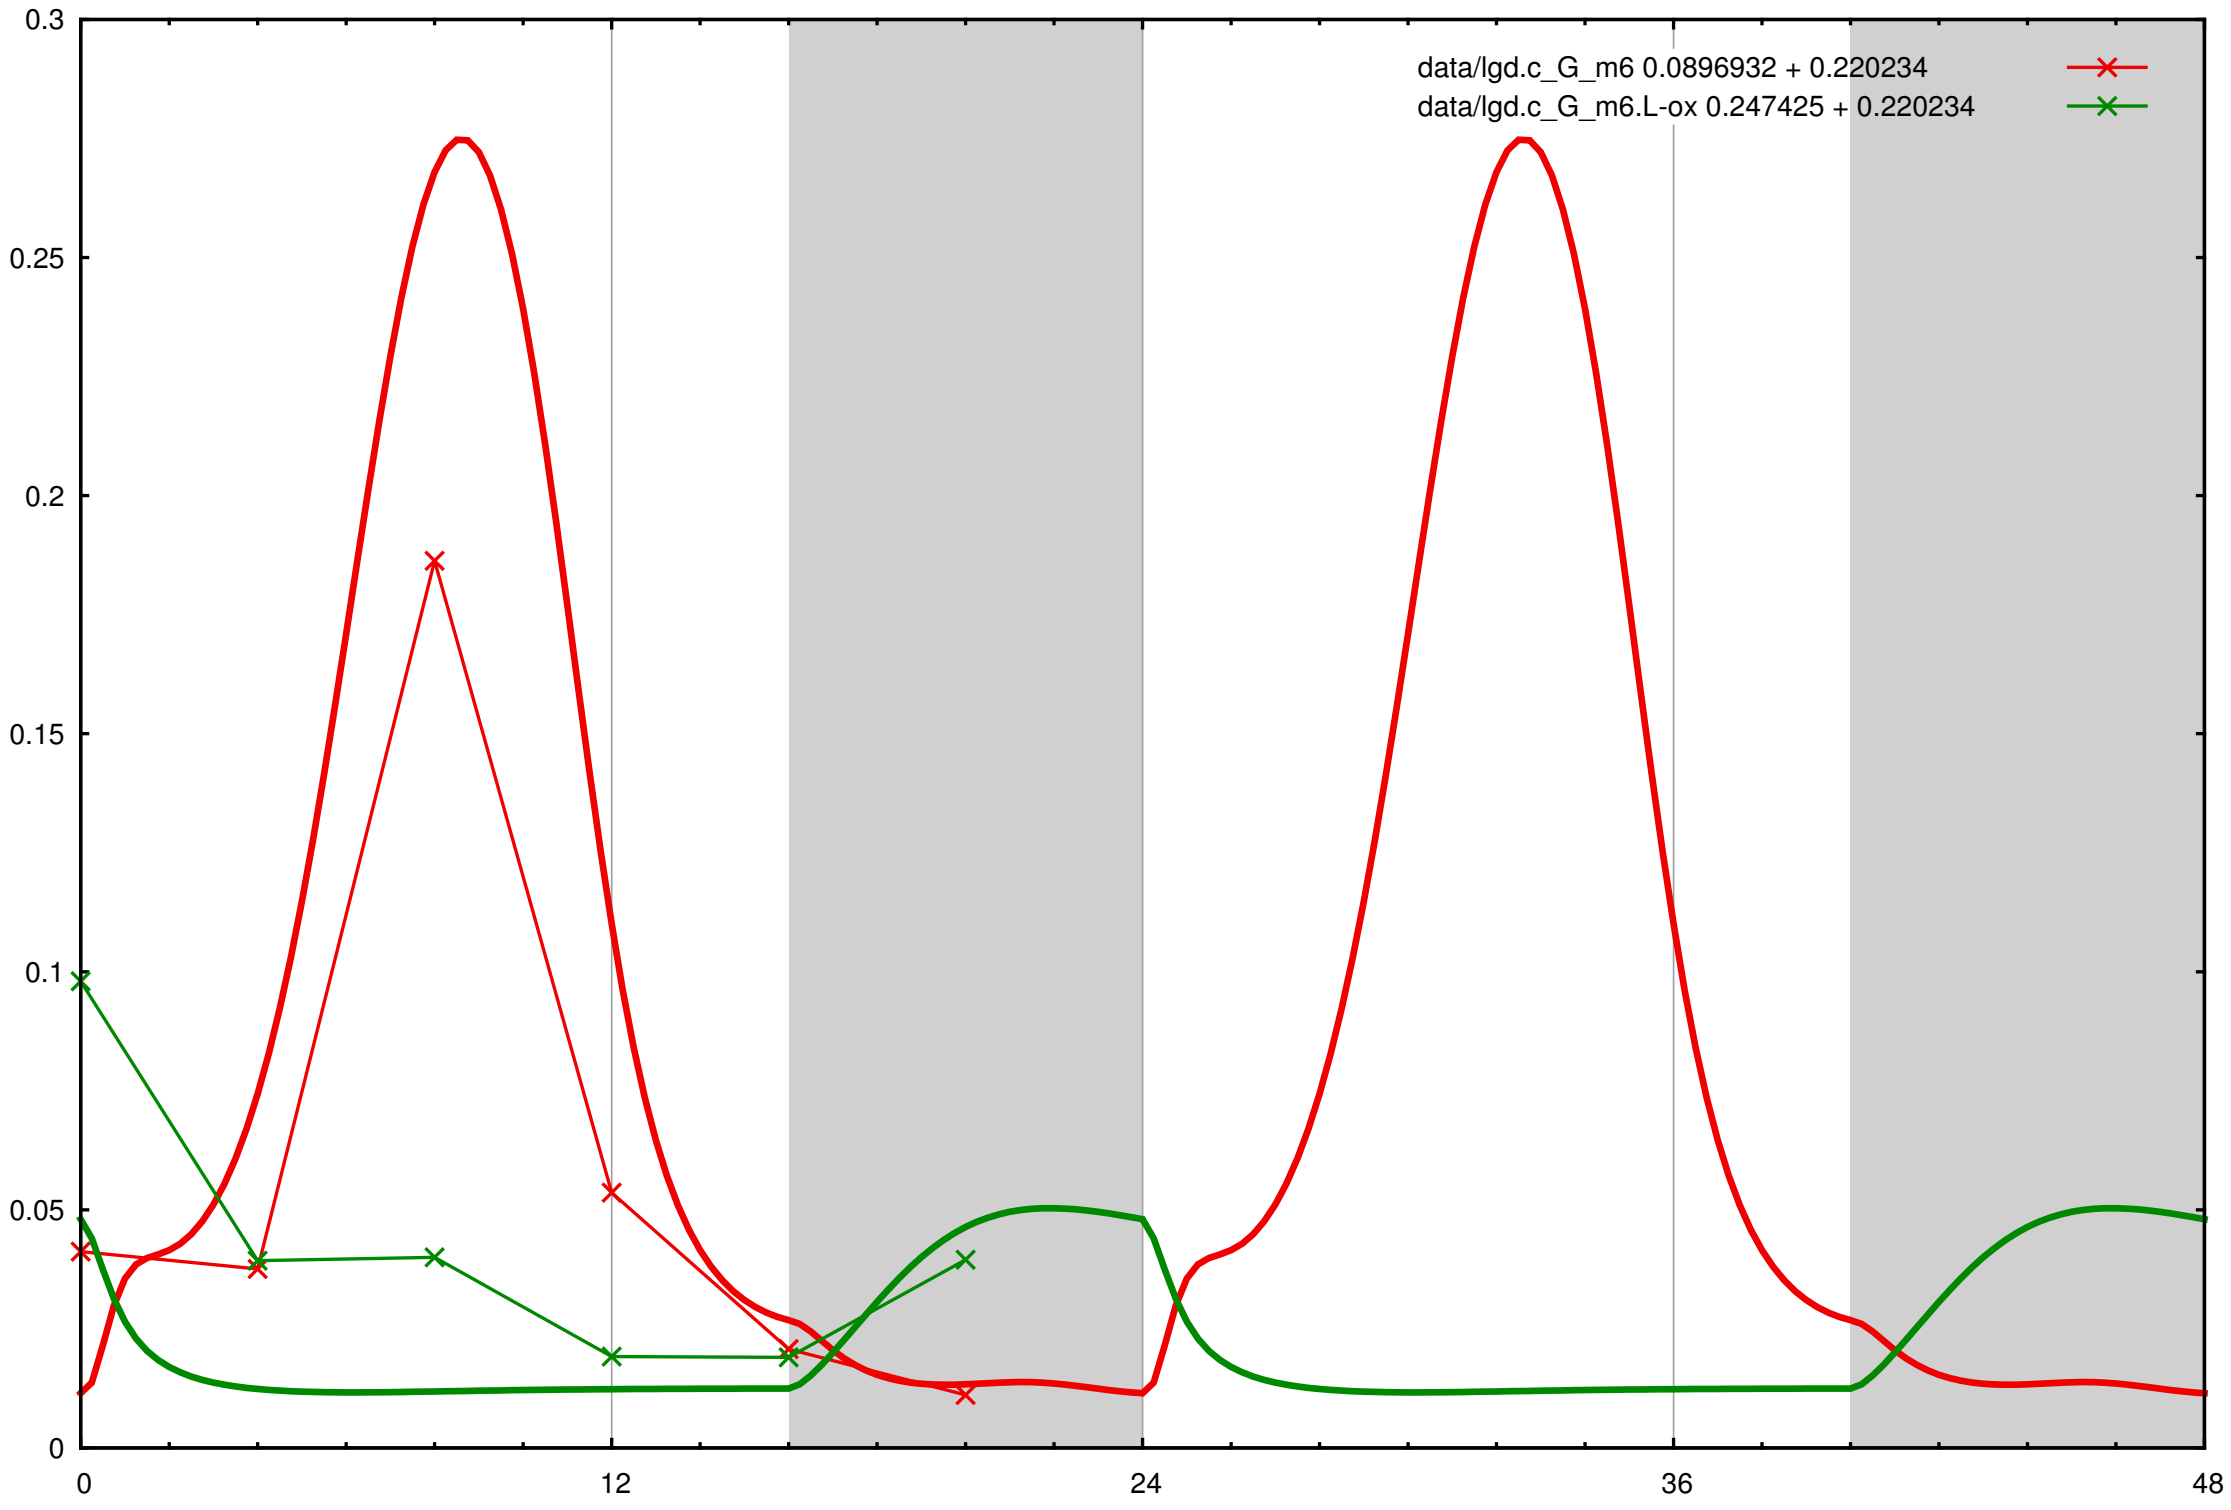

Scale group 87, scost 0.000142744

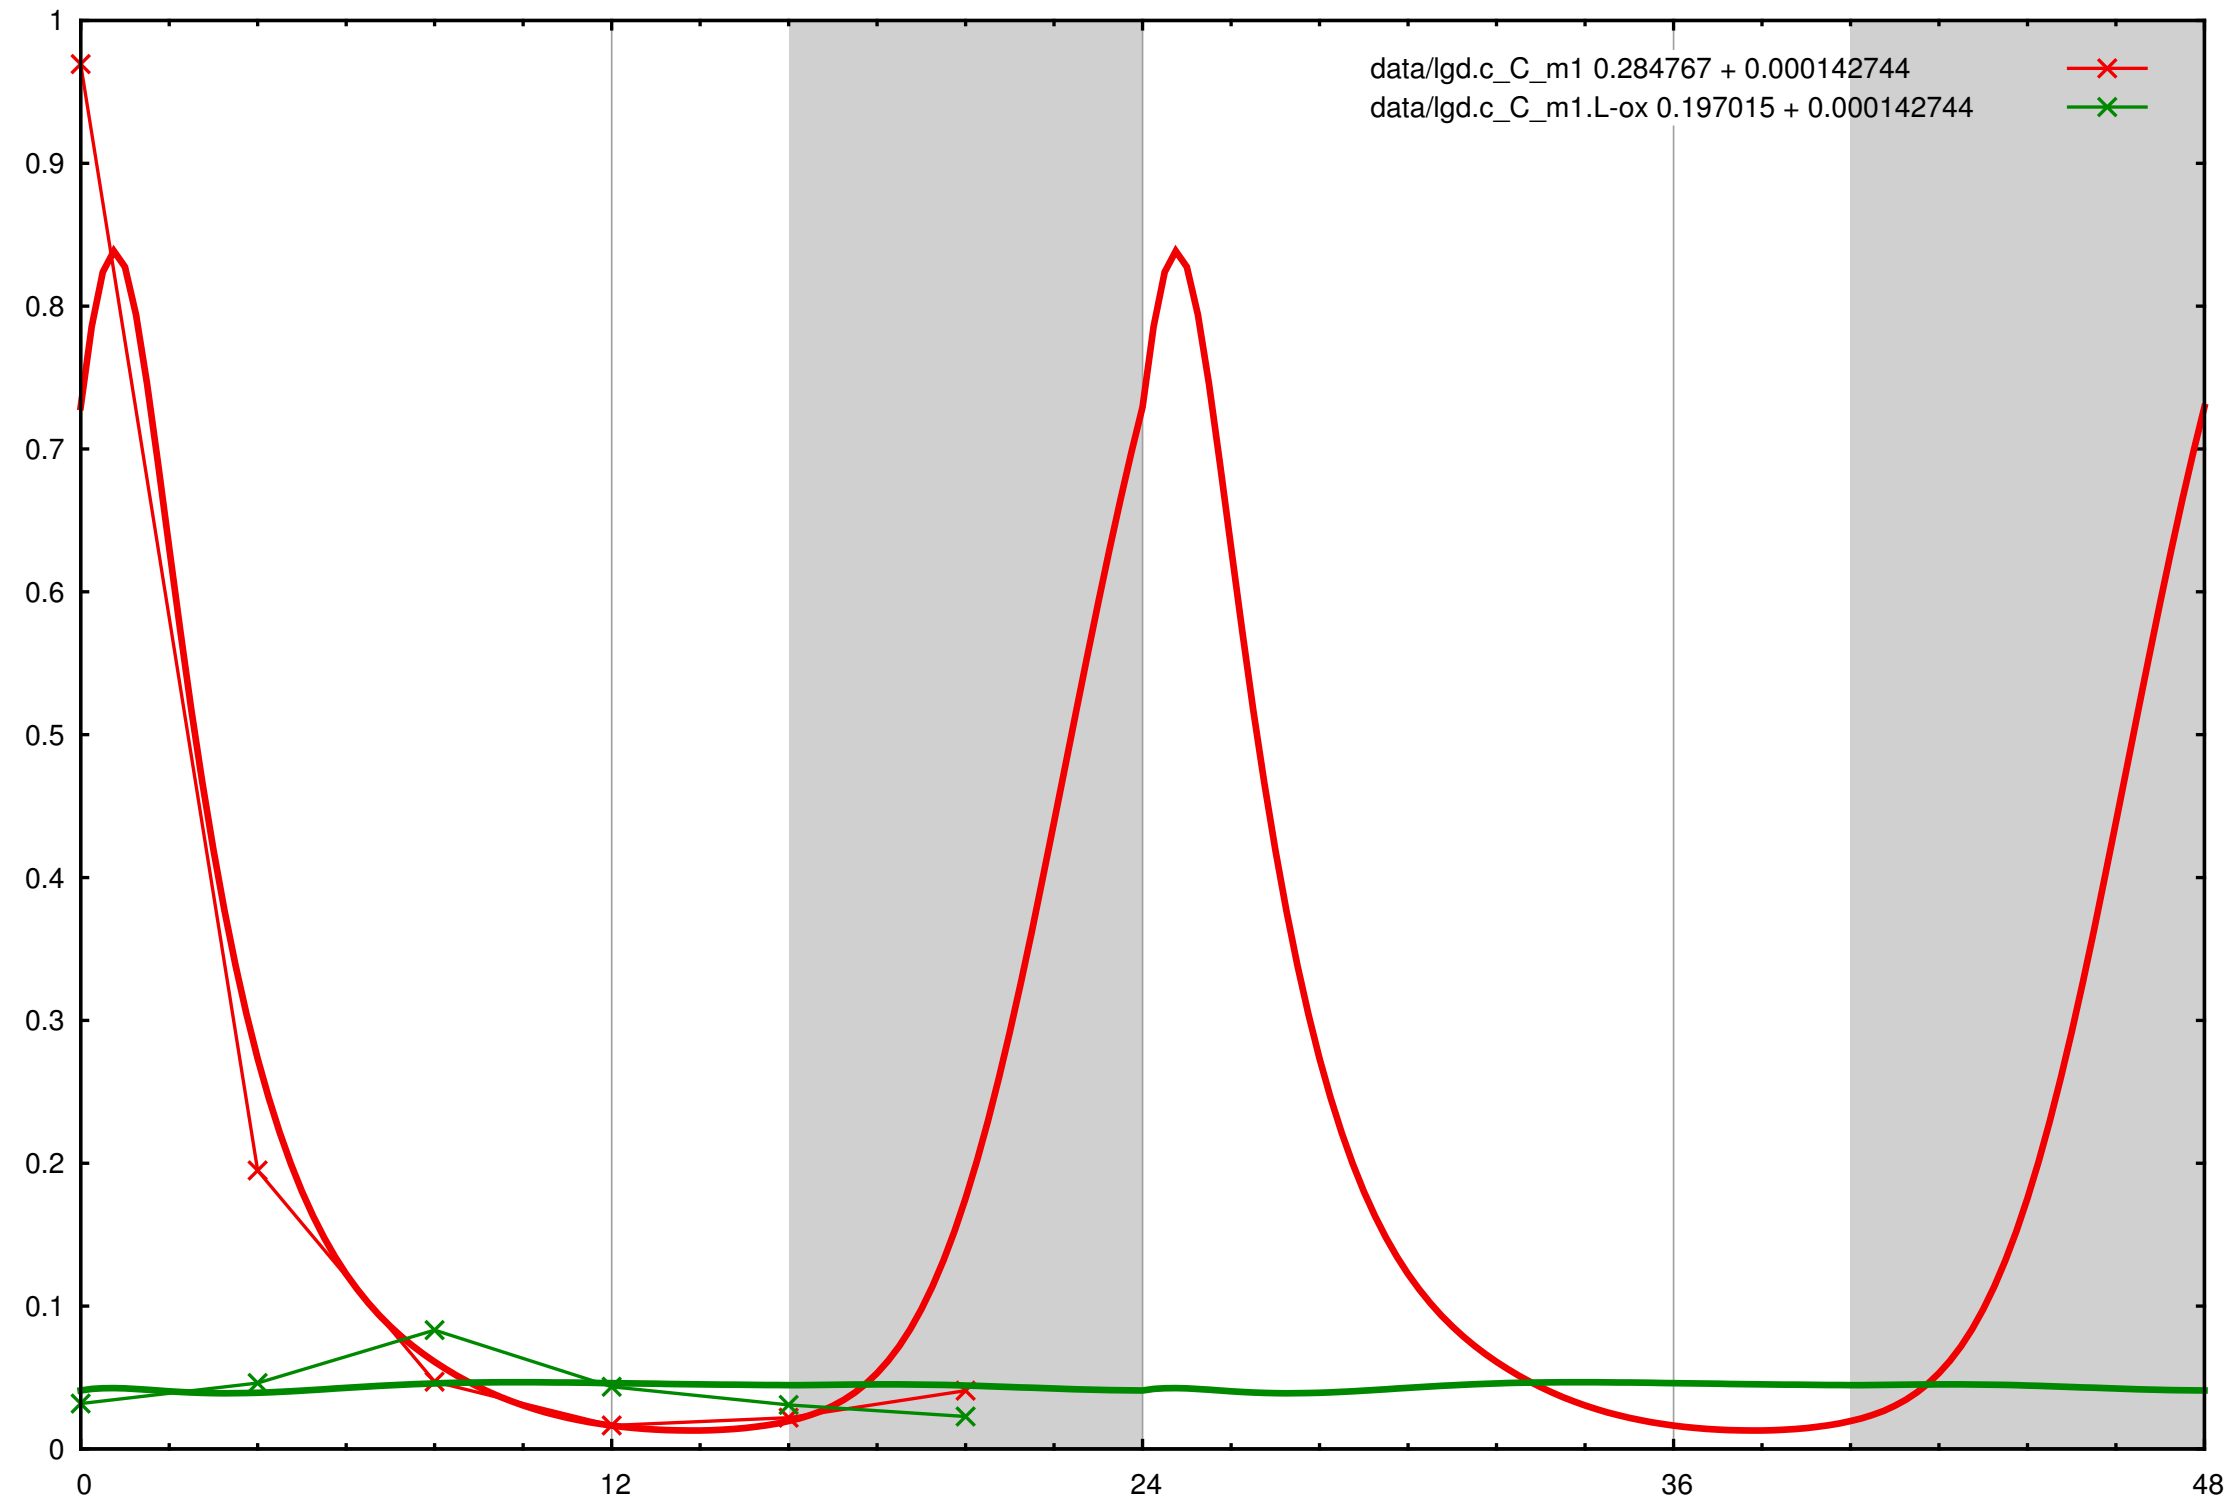

Scale group 88, scost 0.0720701

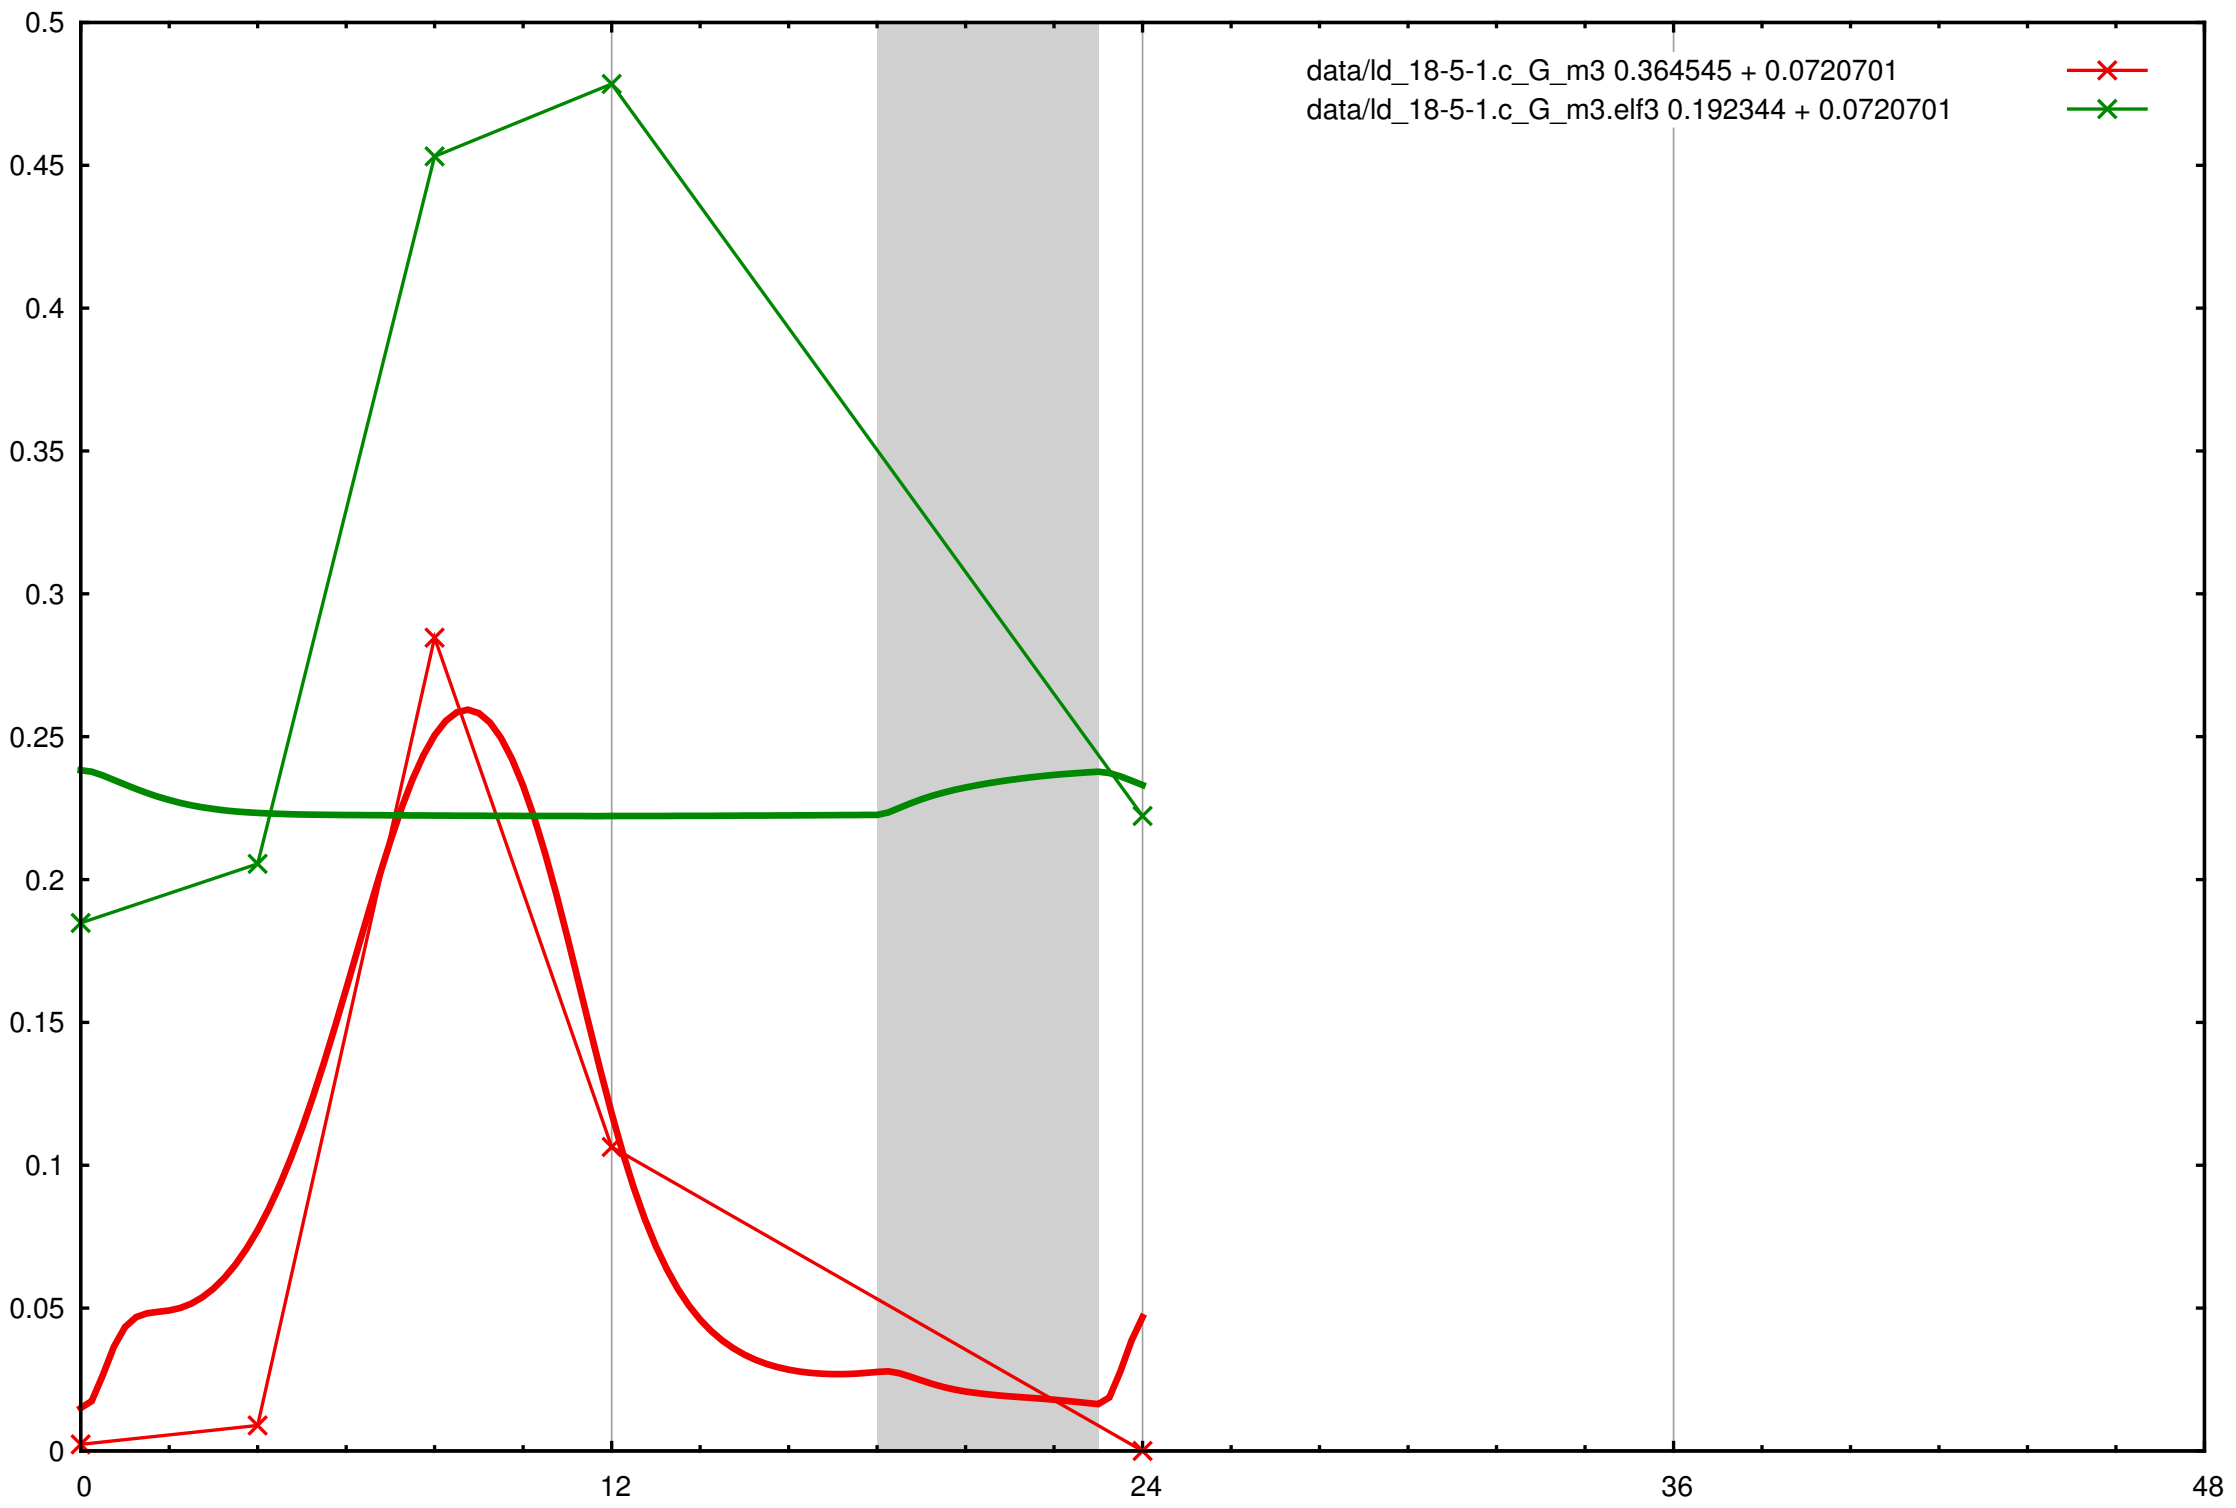



Scale group 89, scost 0.37773

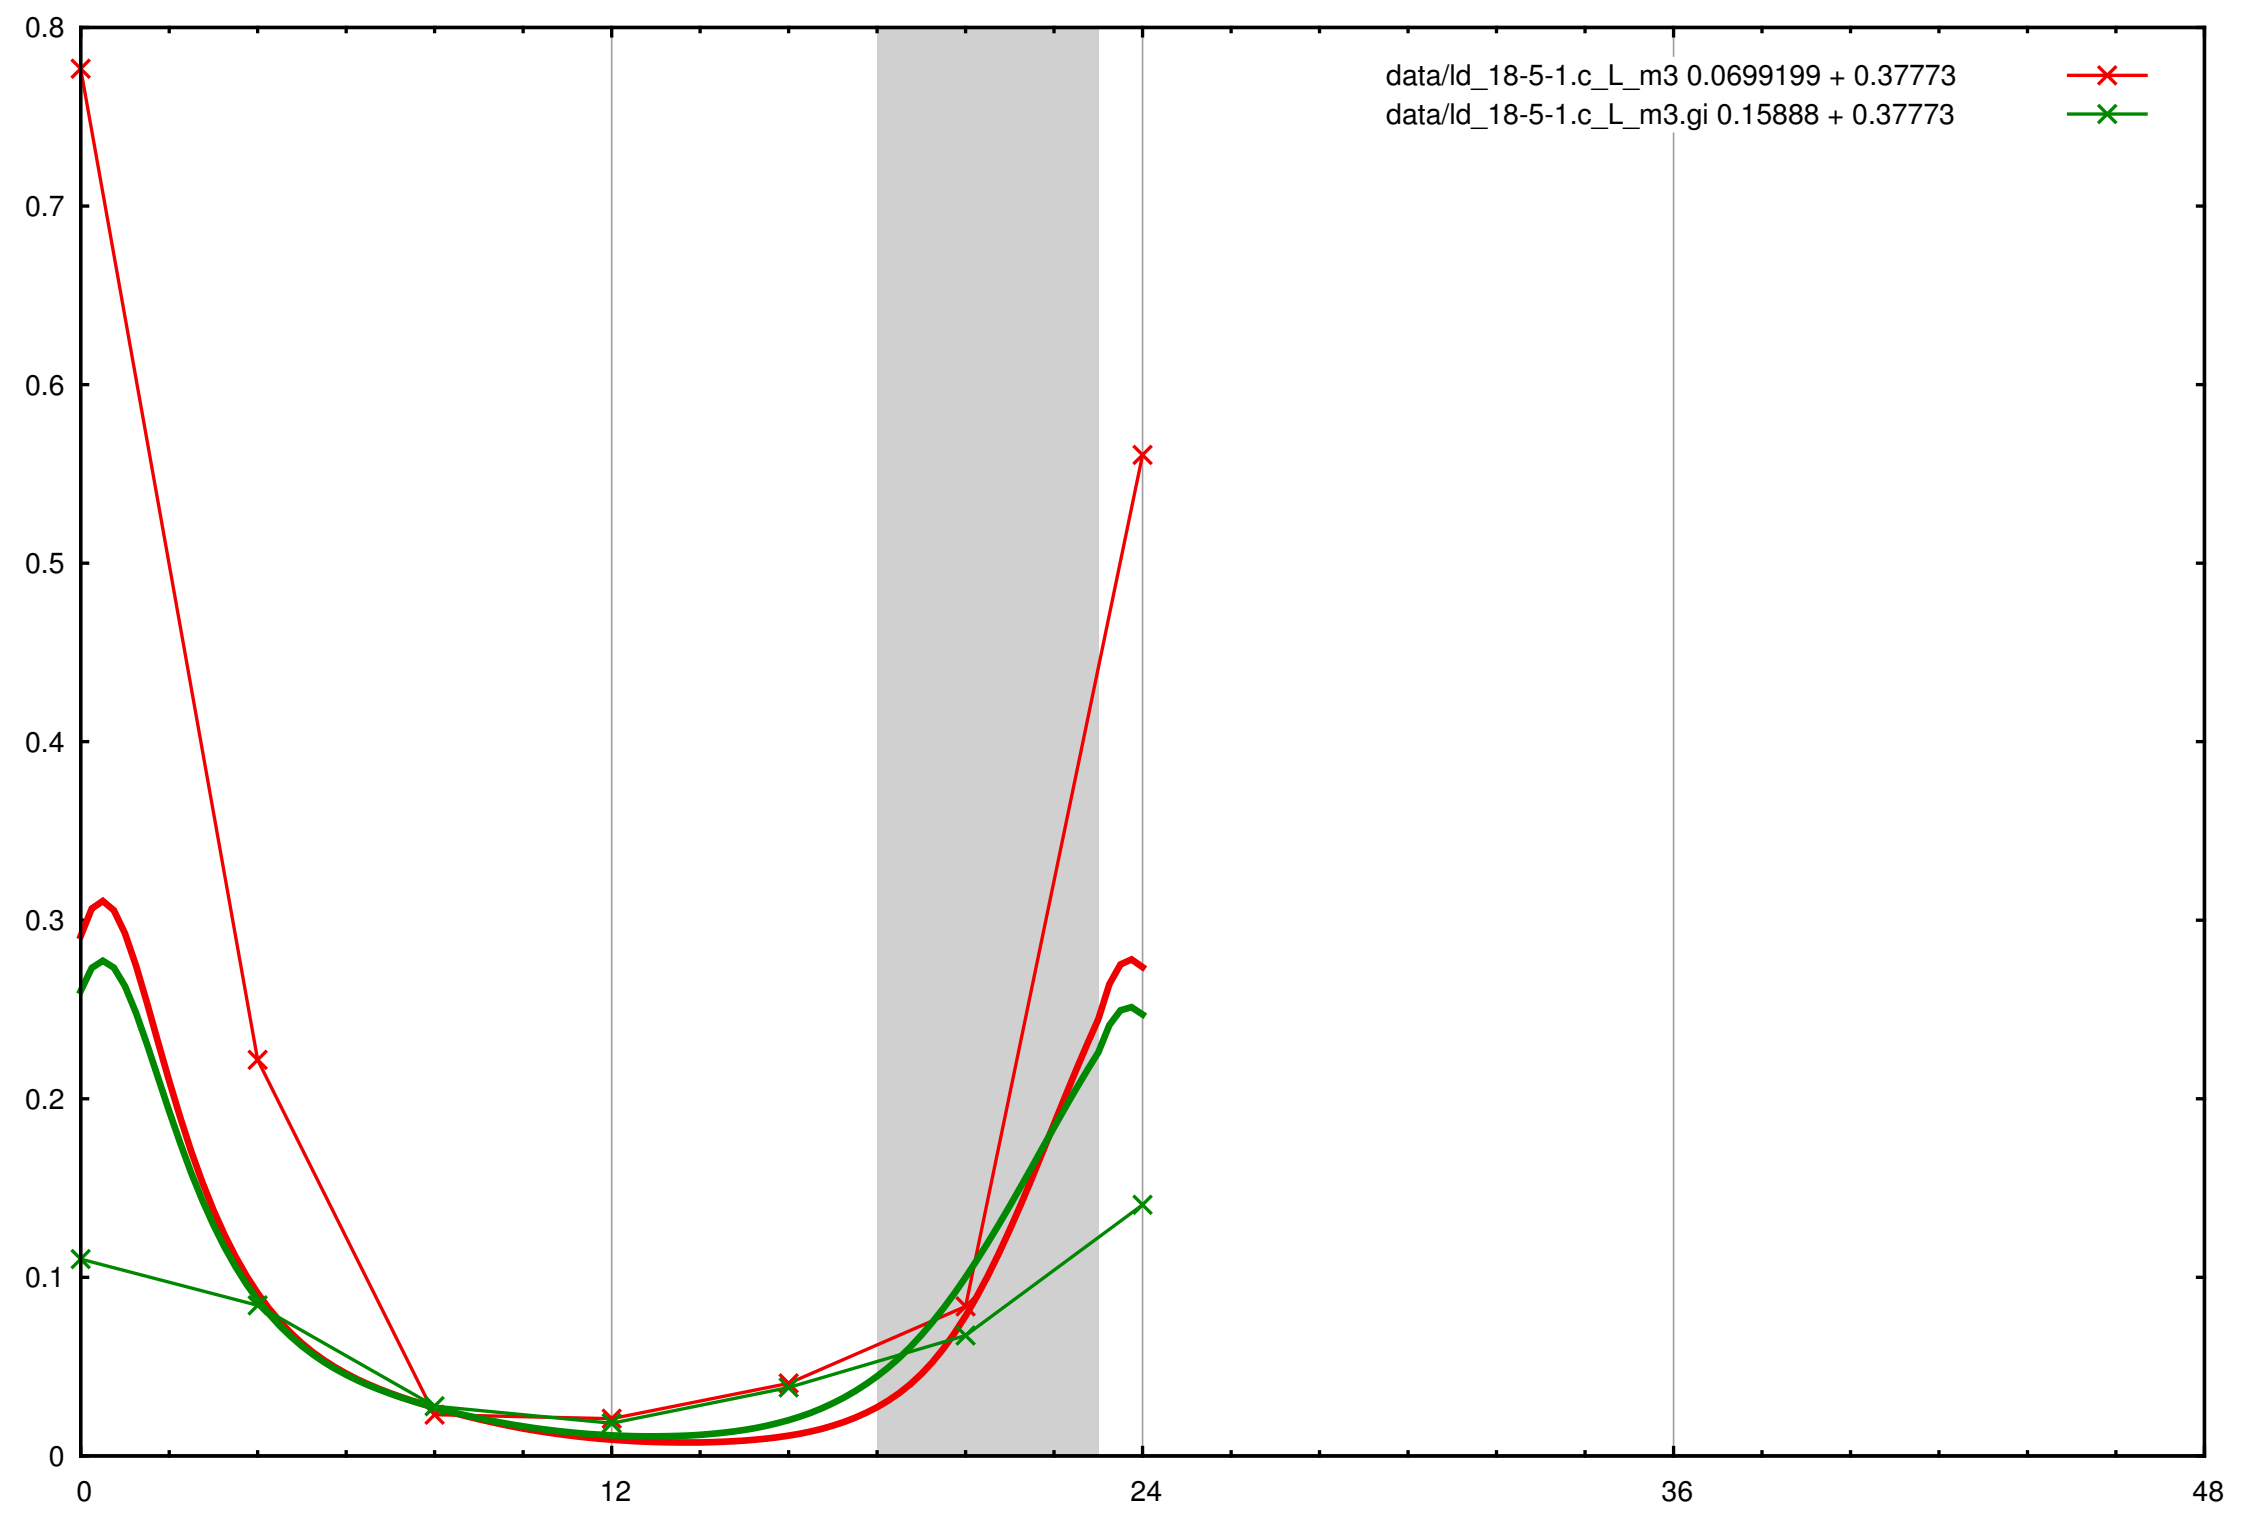

Scale group 90, scost 0.211854

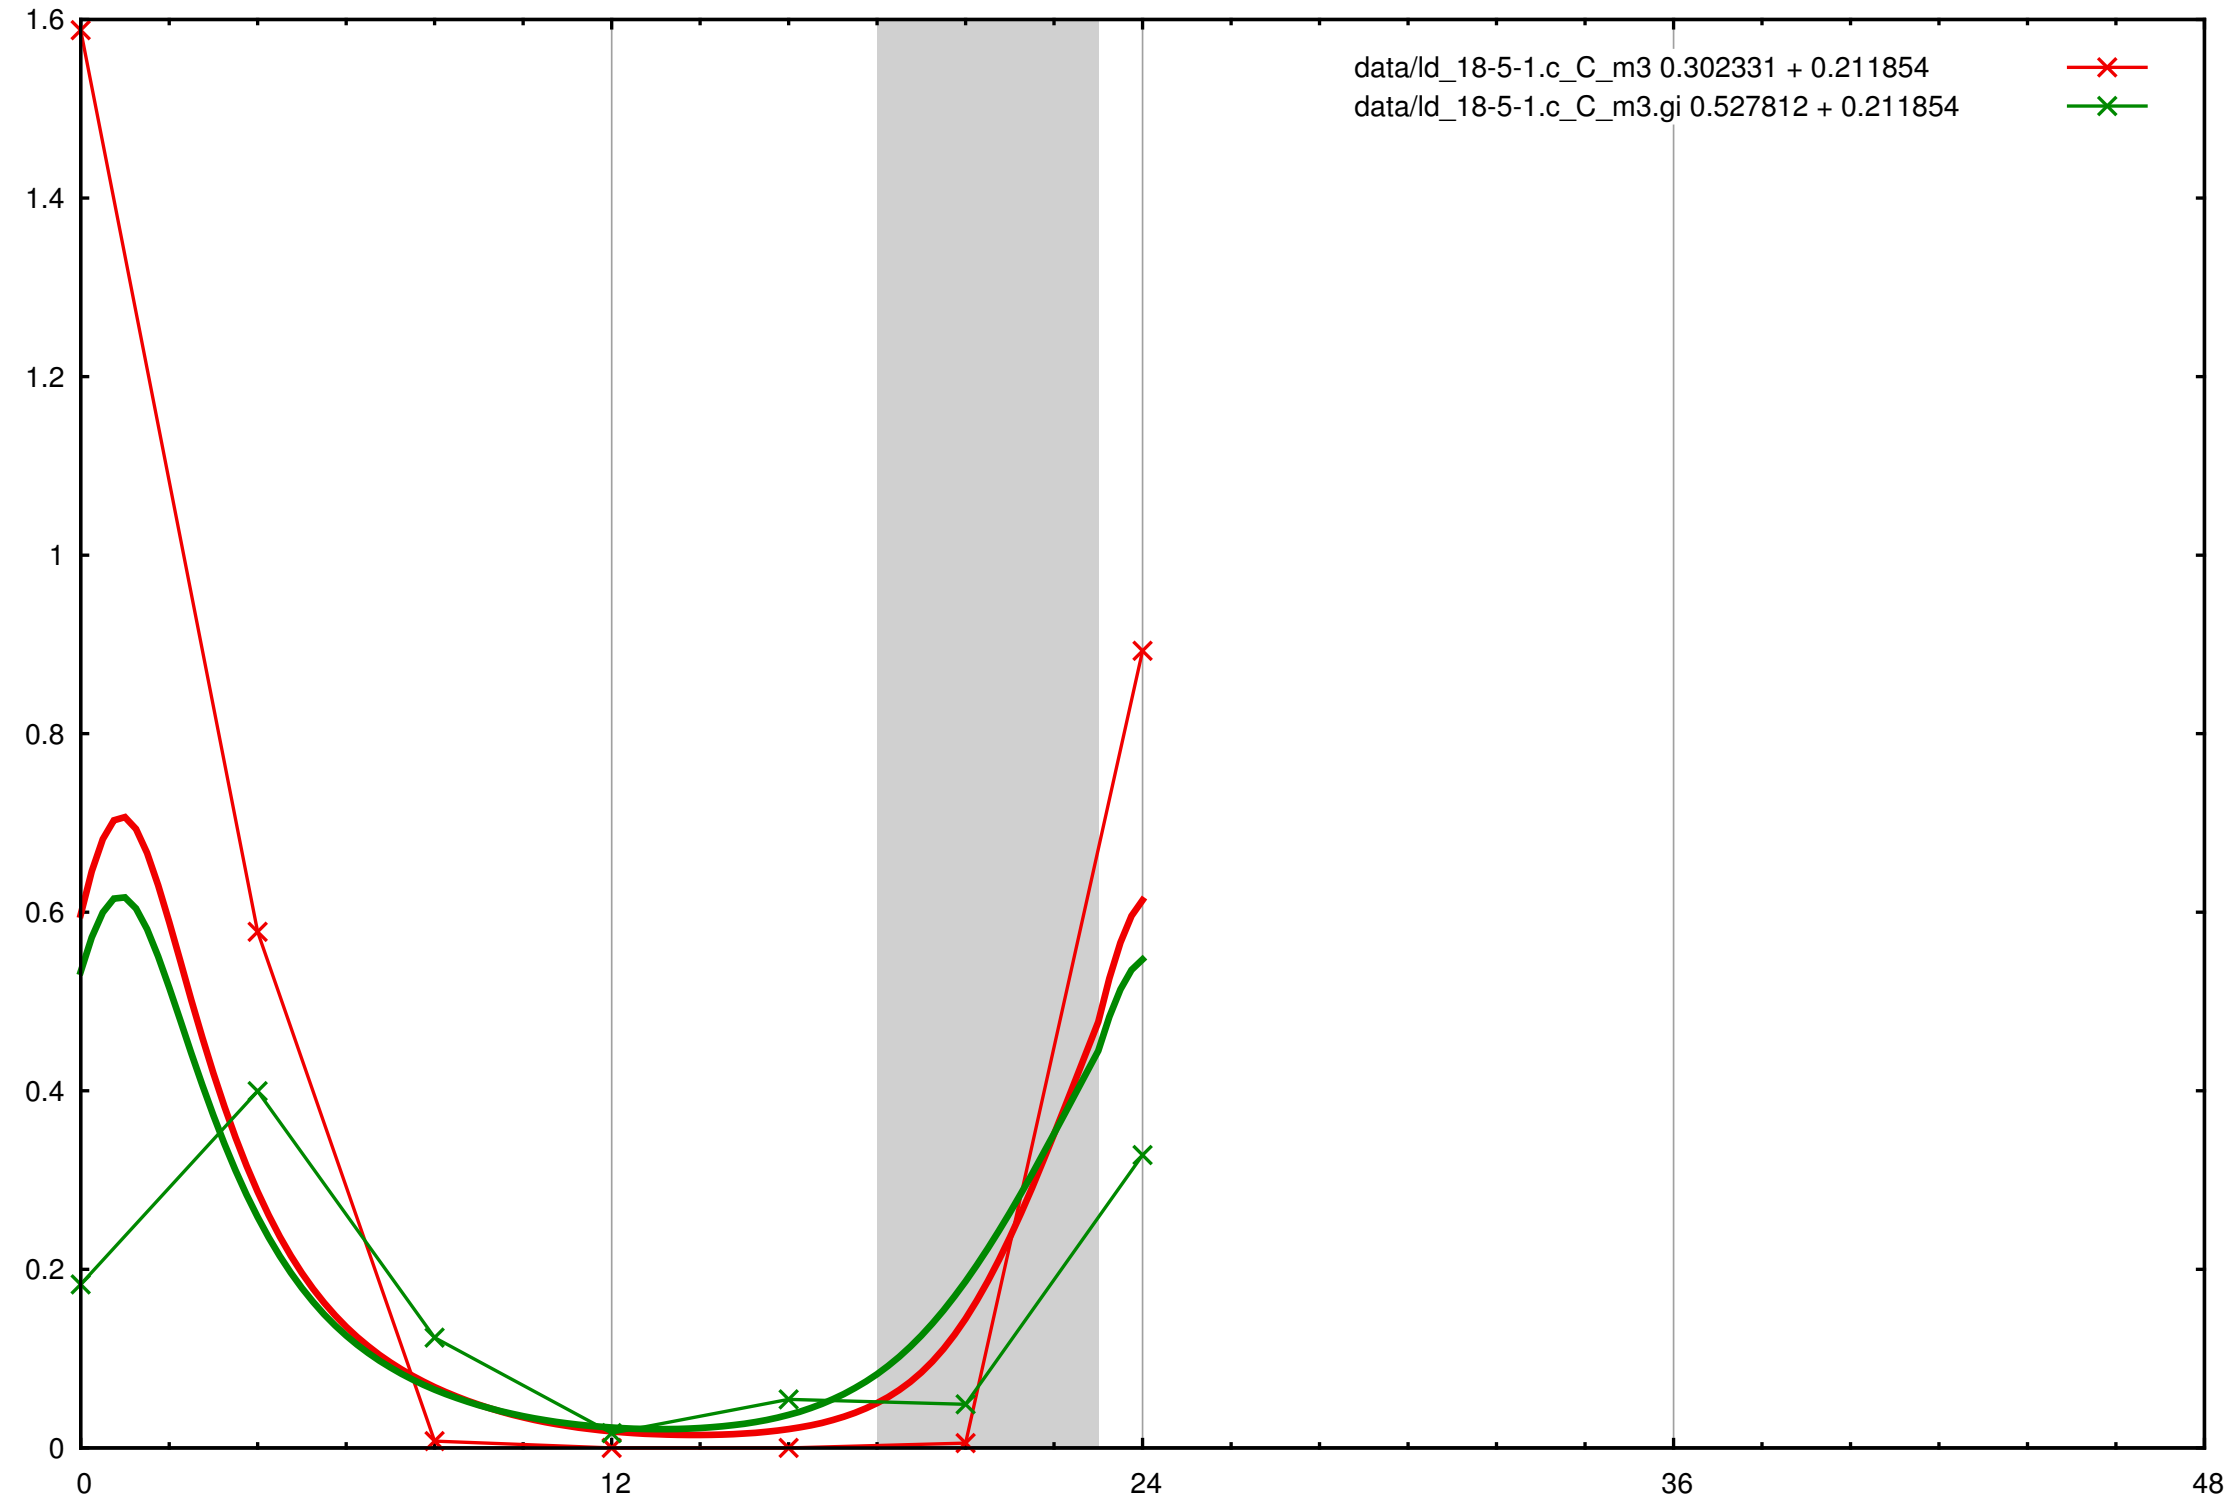

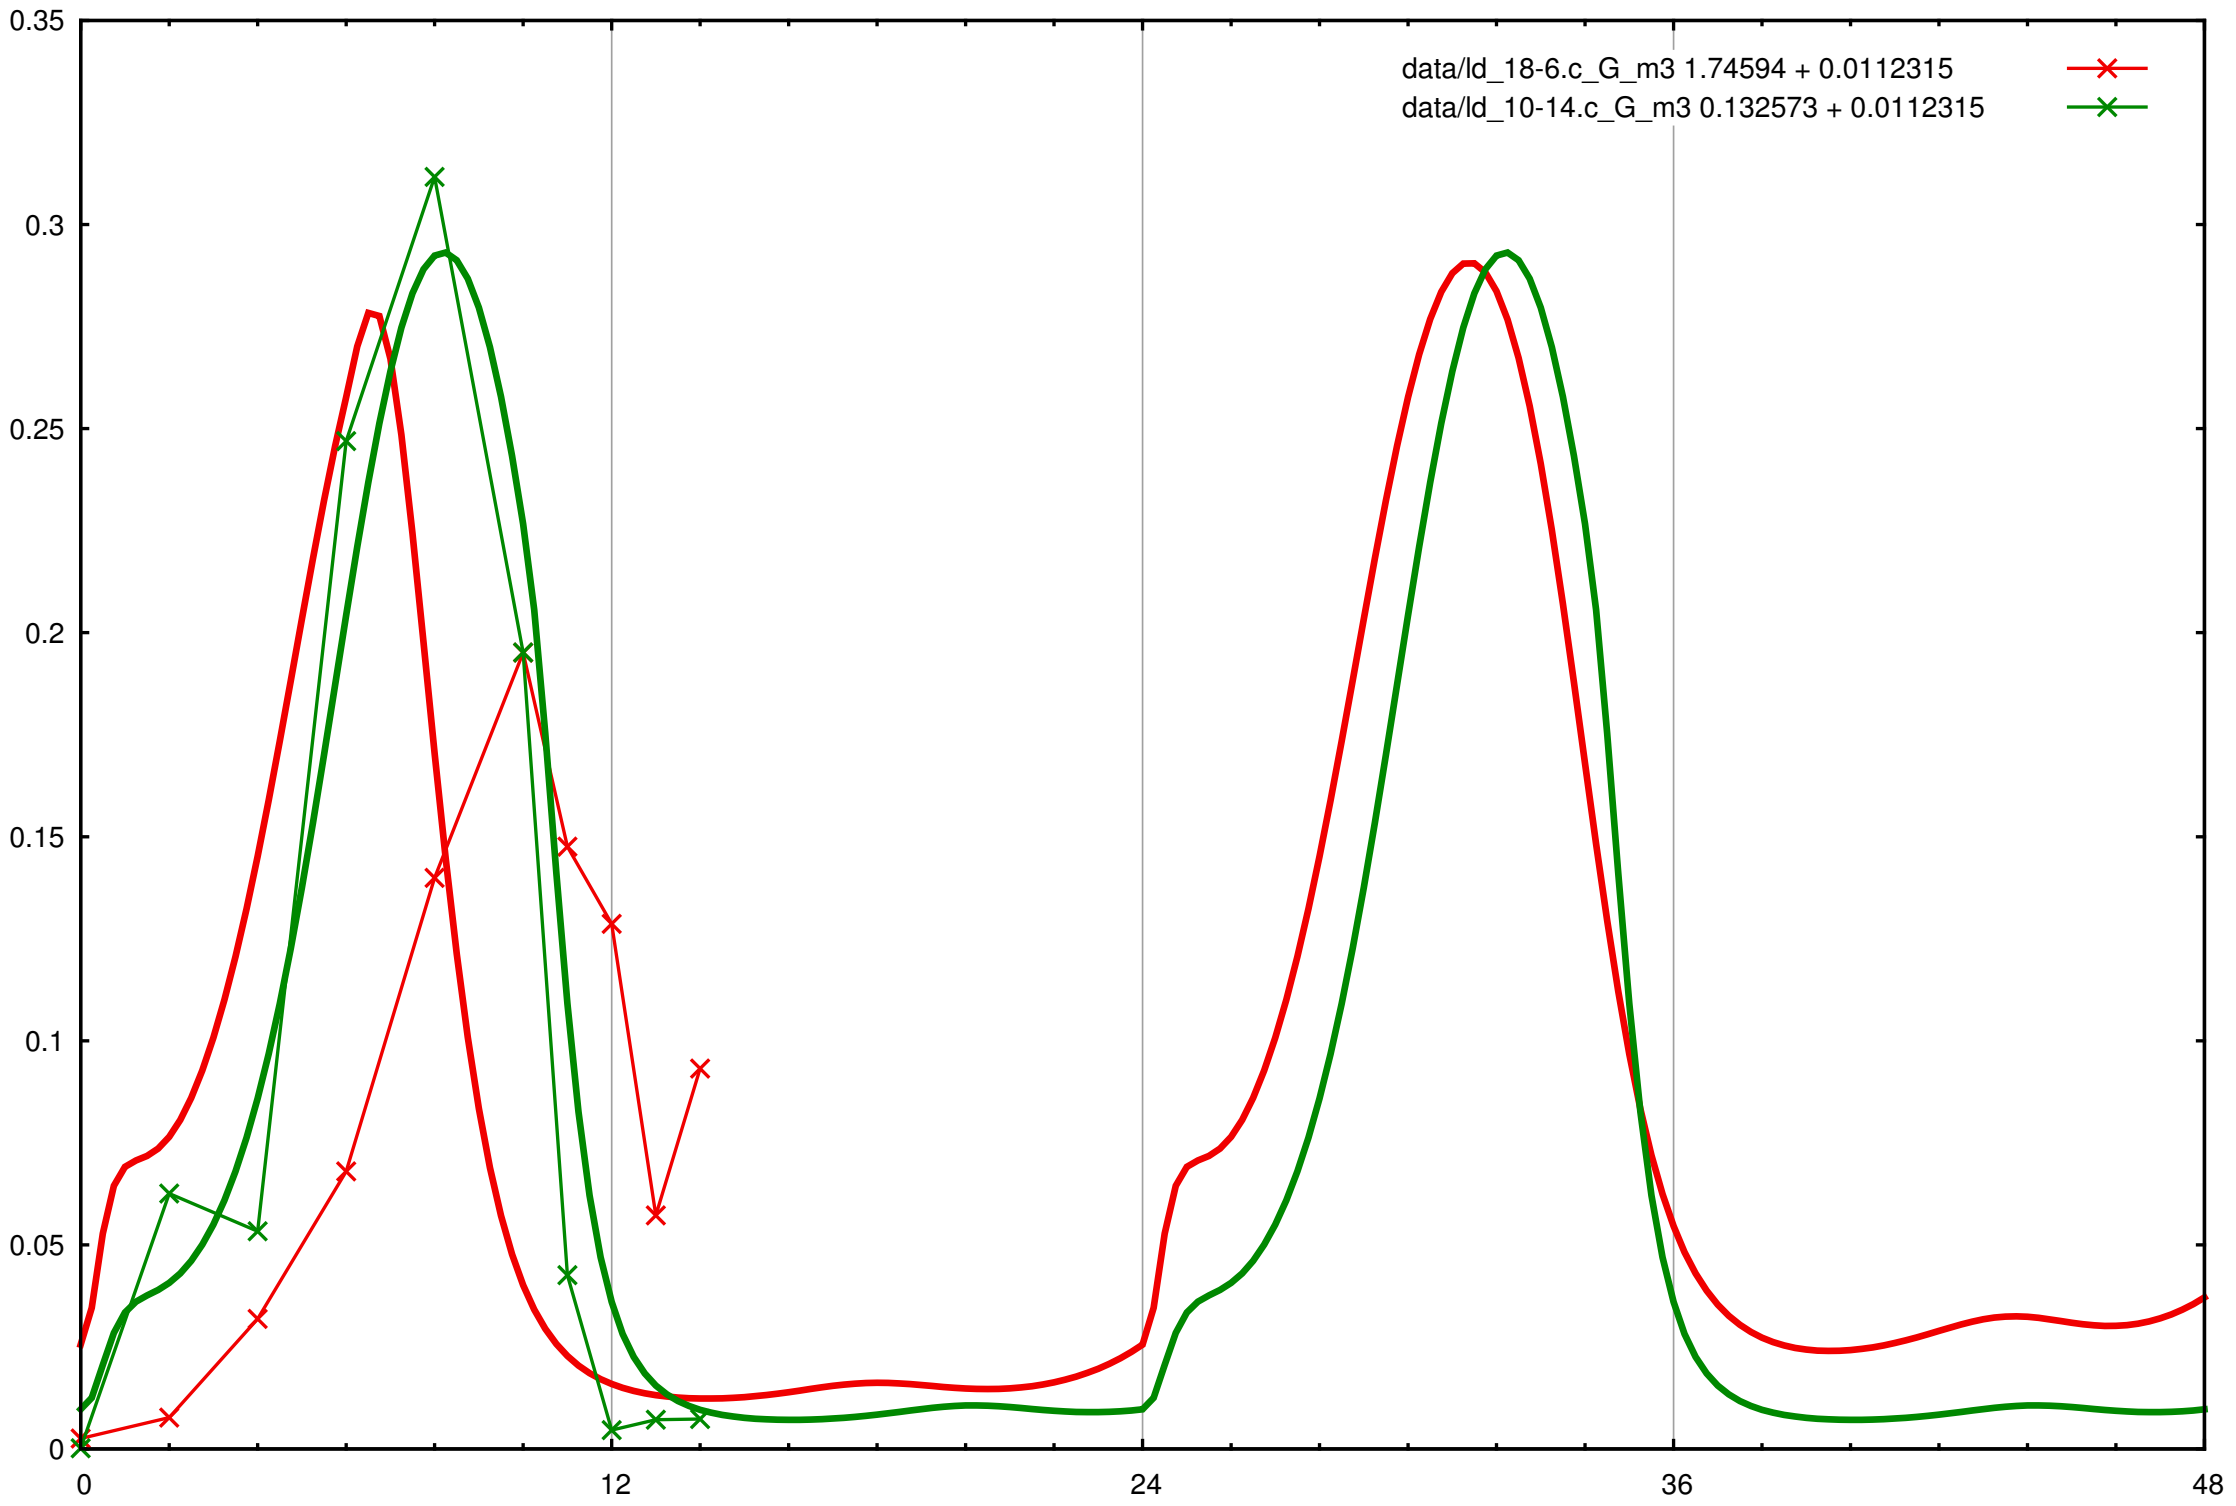

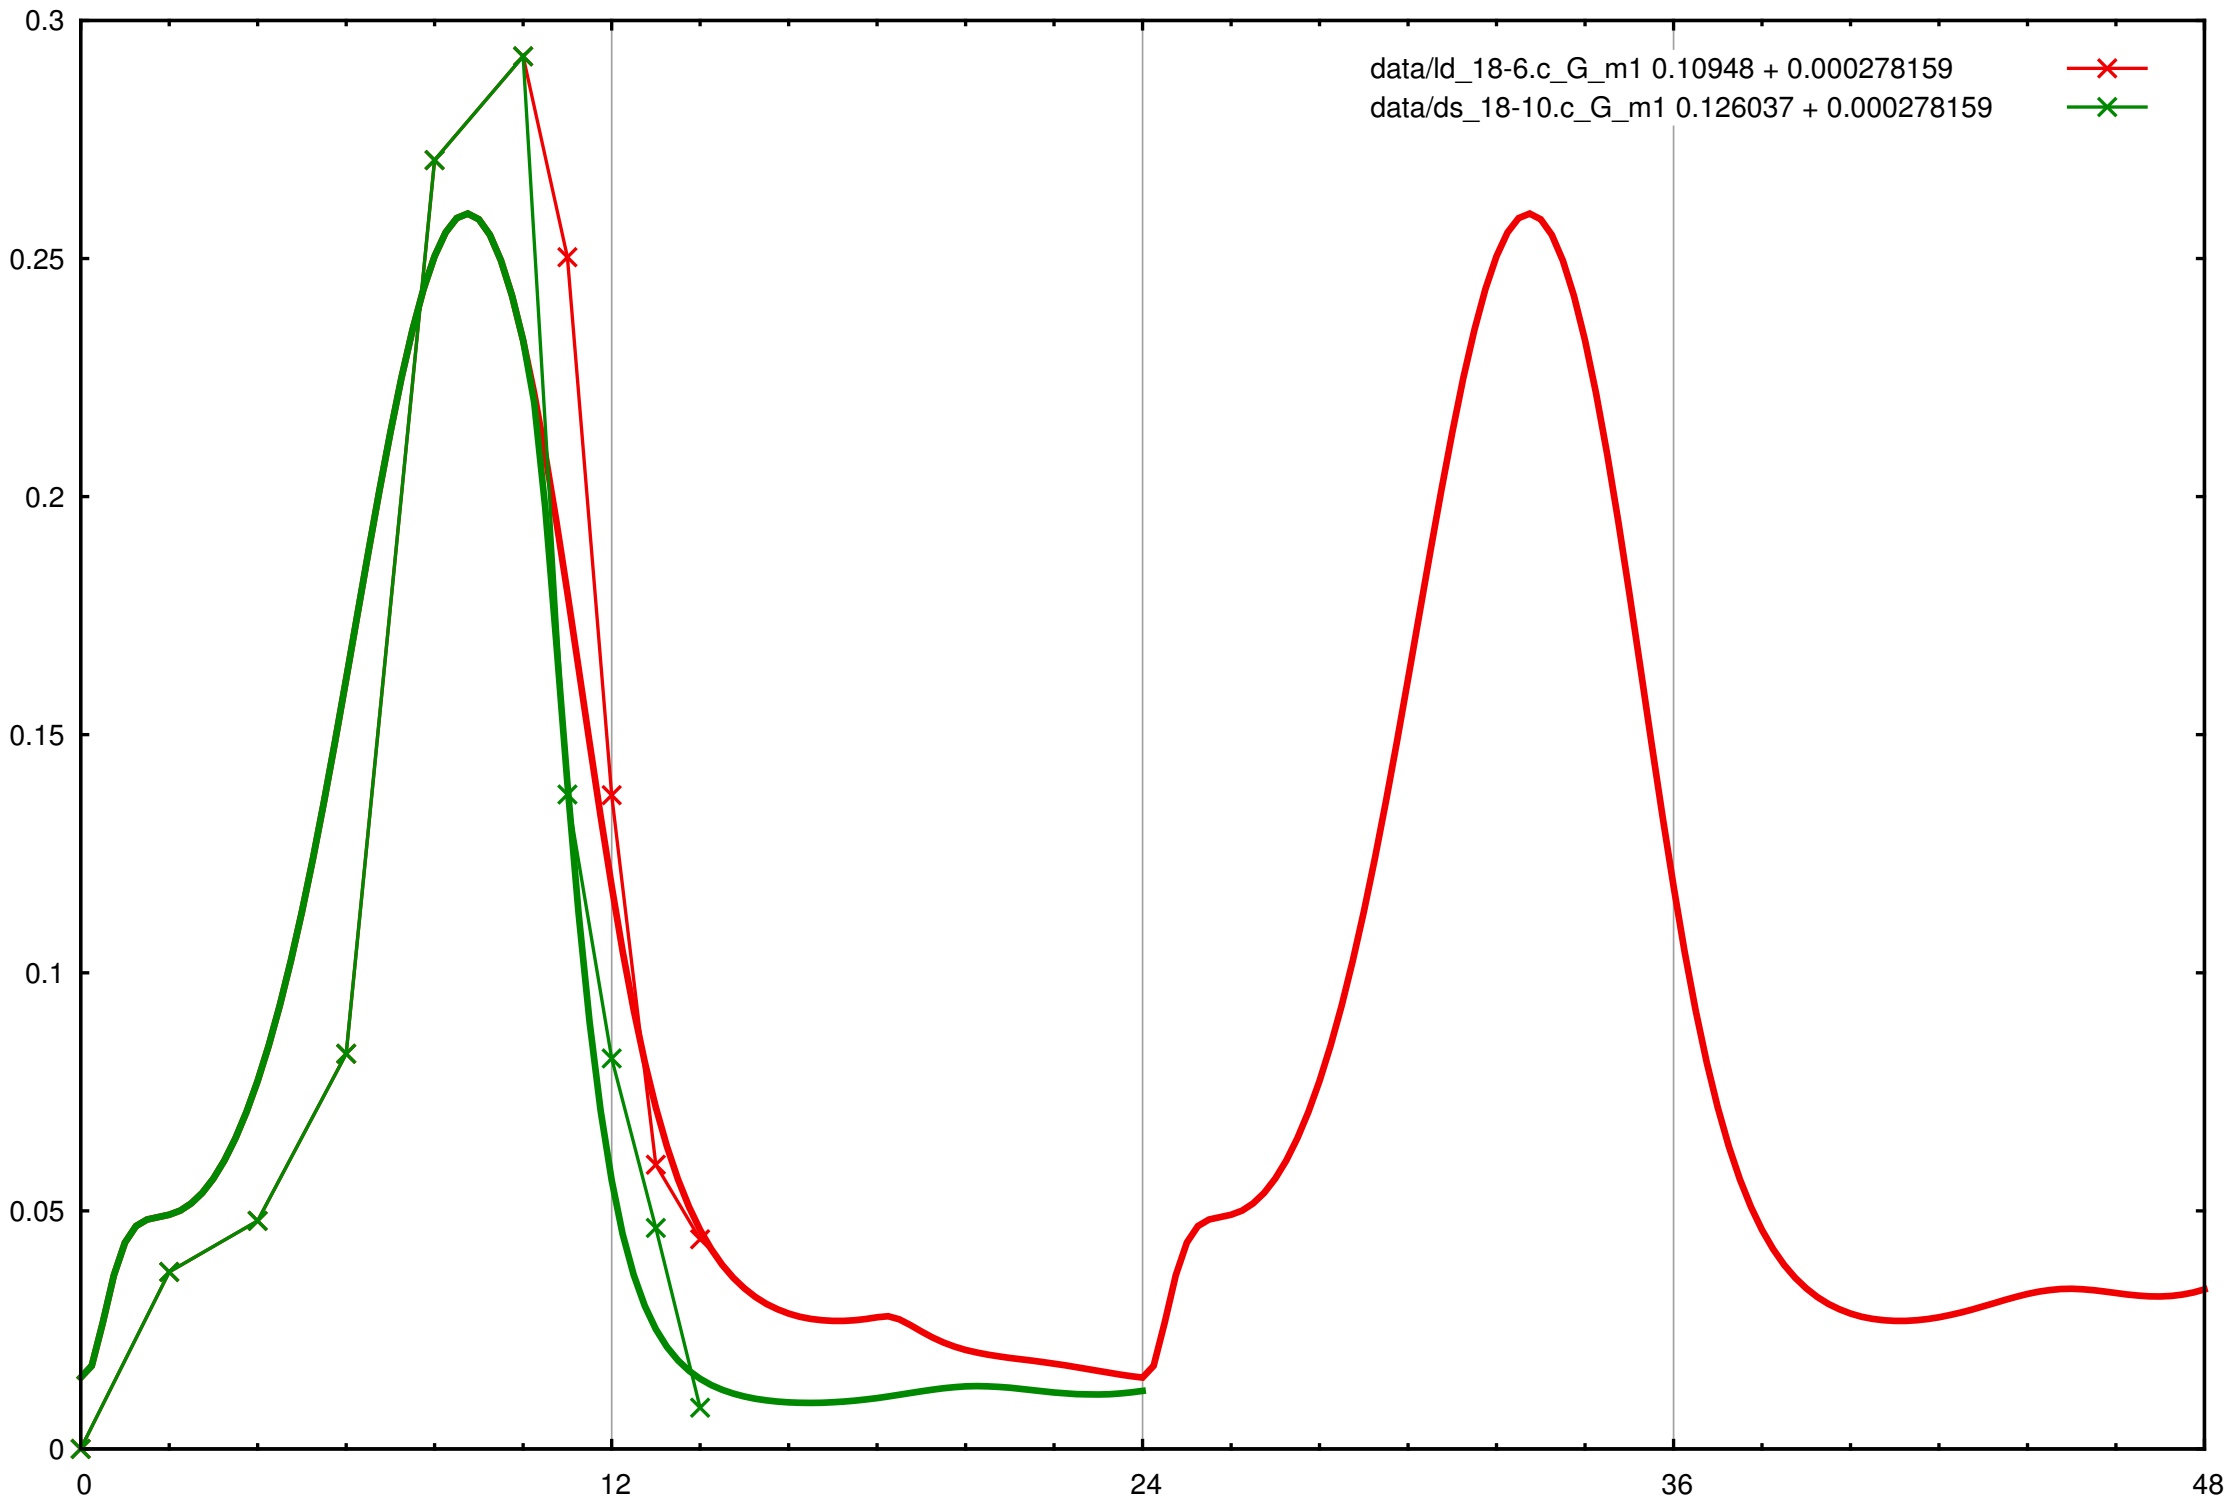

Scale group 93, scost 0.0711849

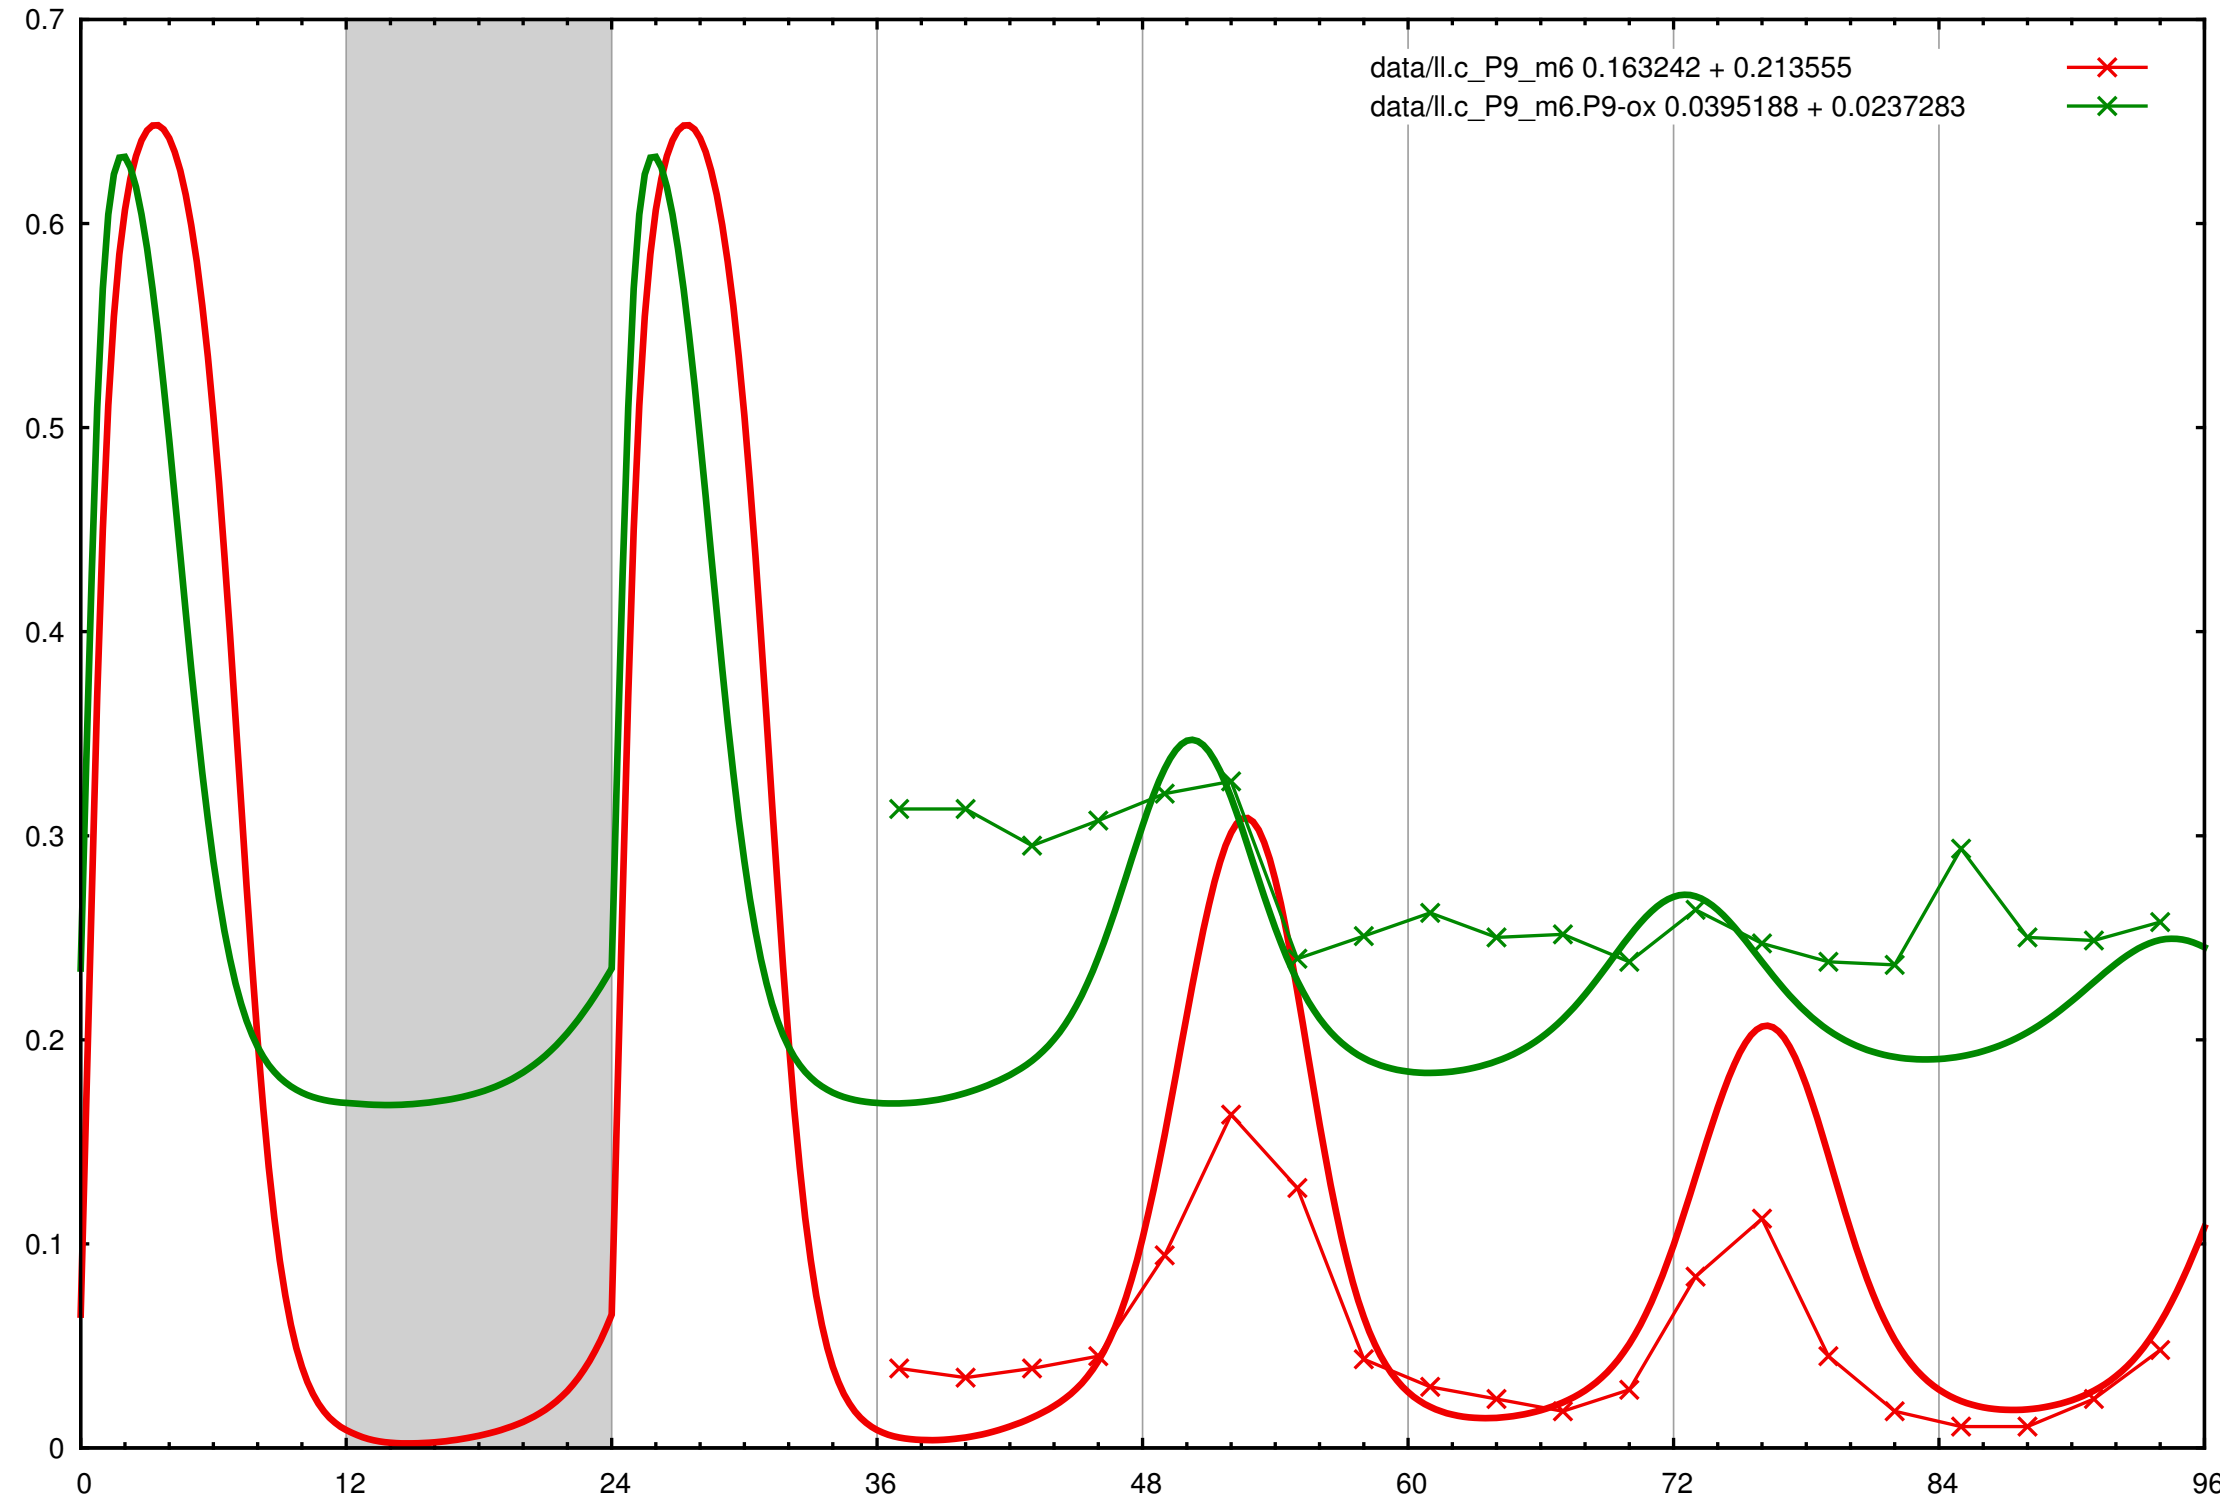

Scale group 94, scost 0.00446778

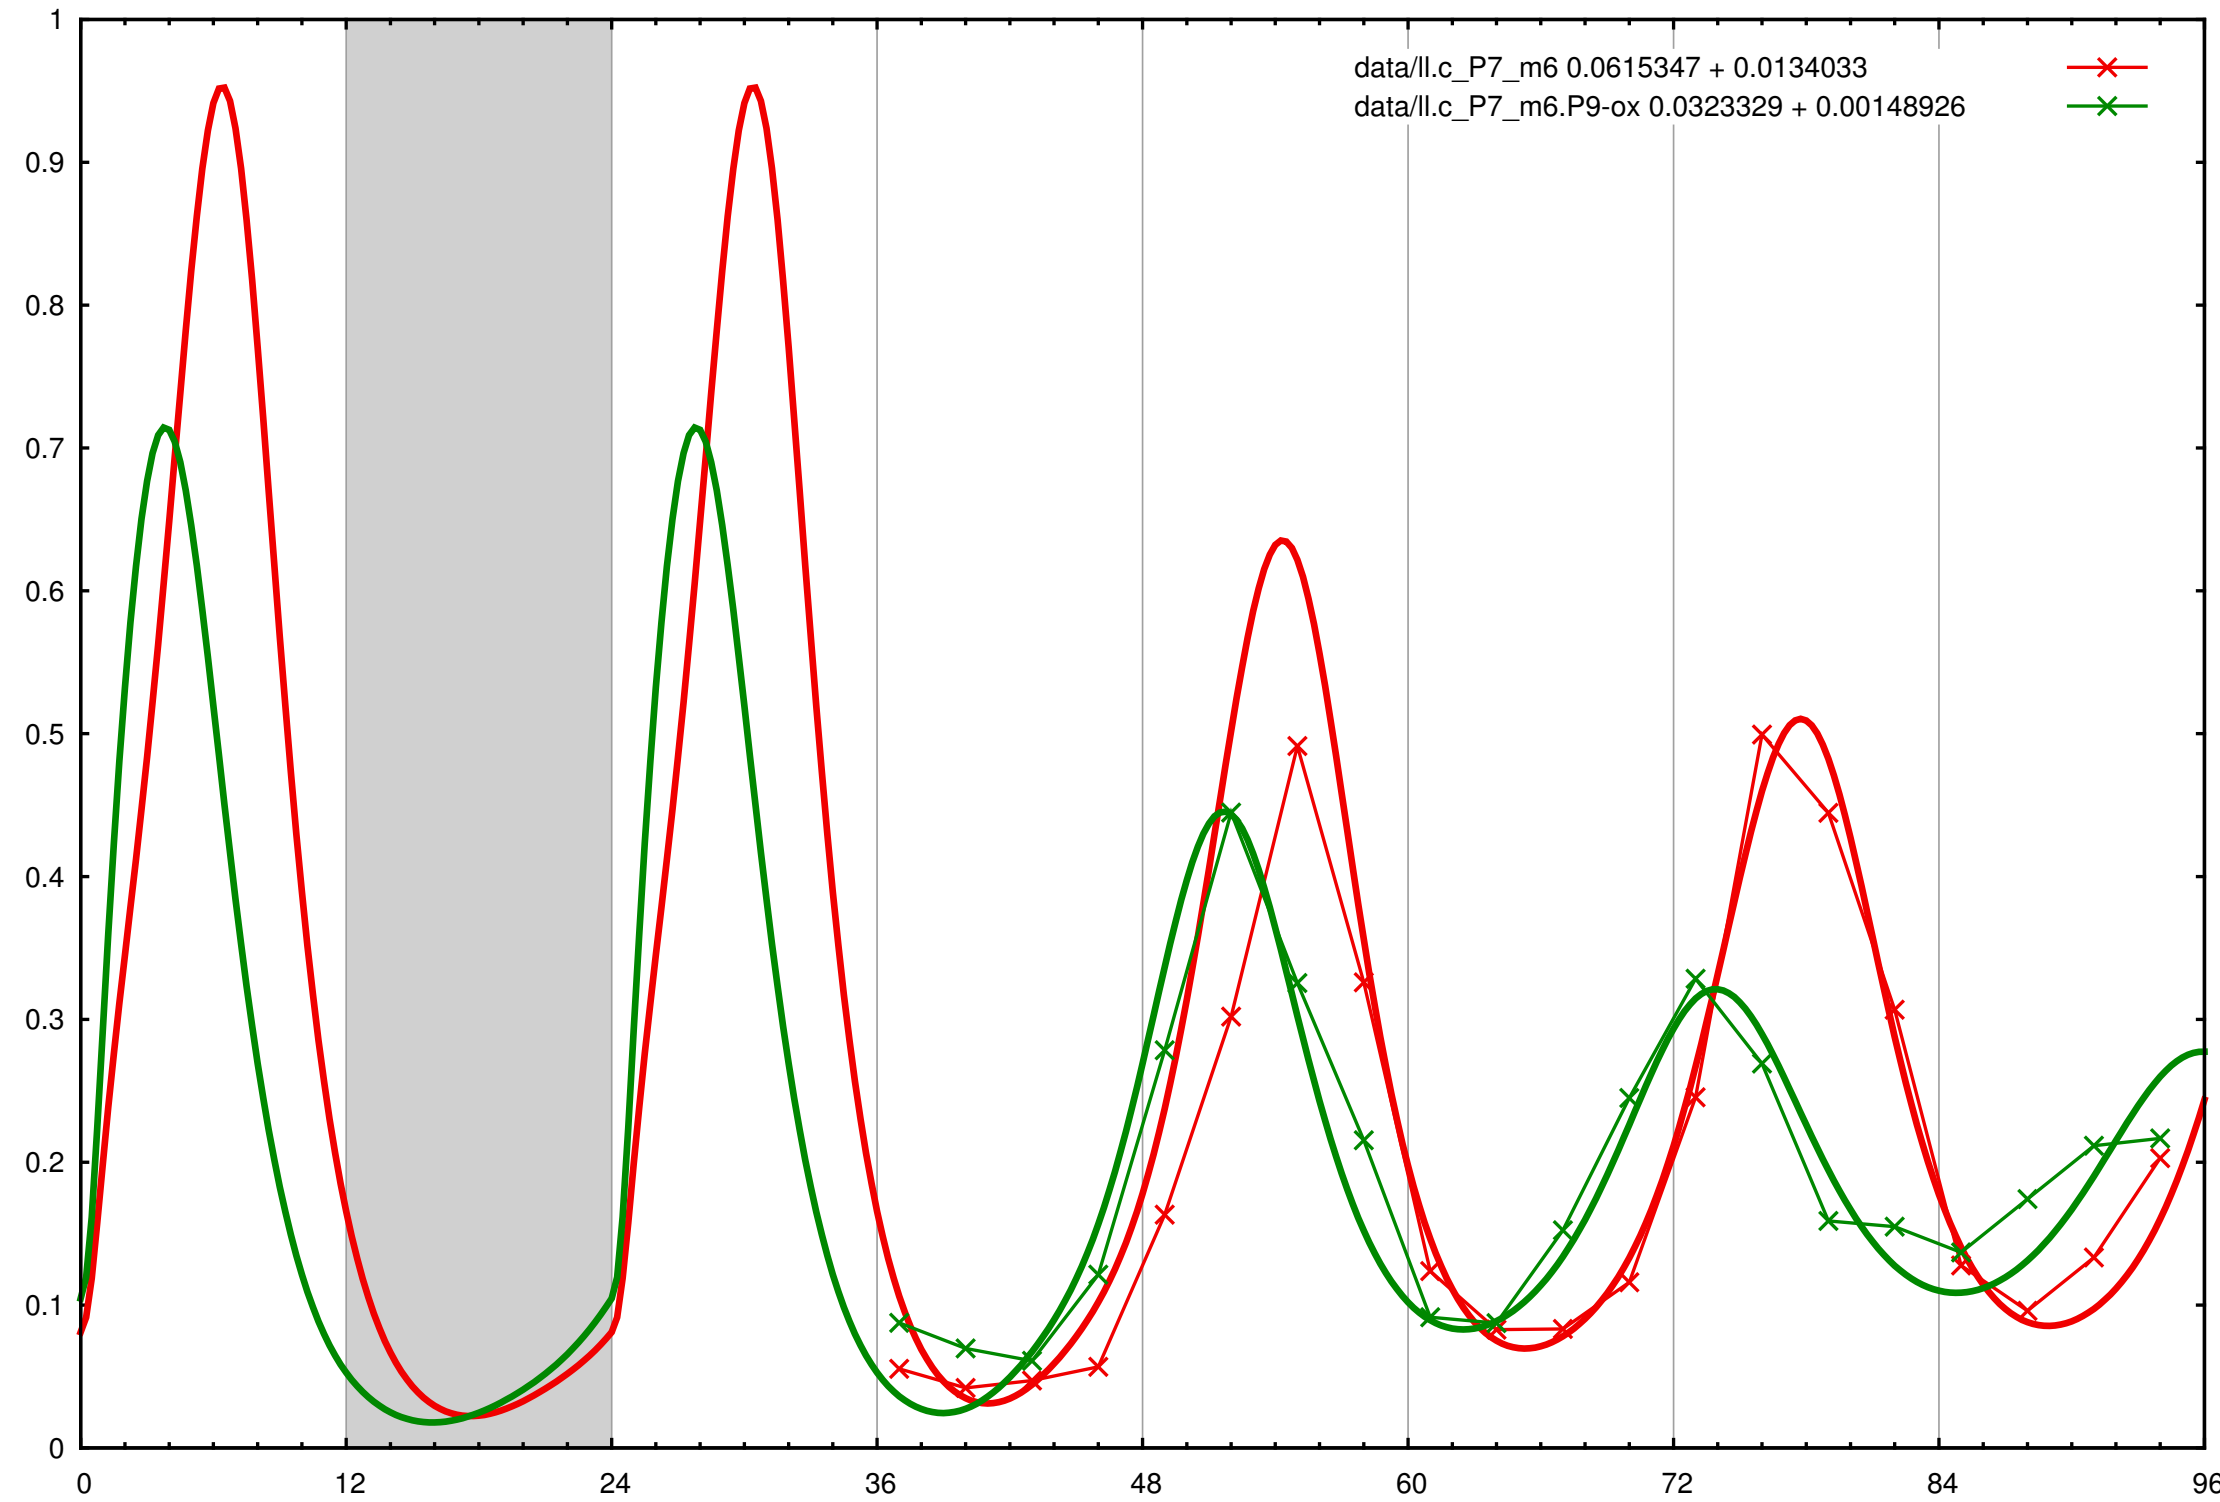

Scale group 95, scost 0.00798664

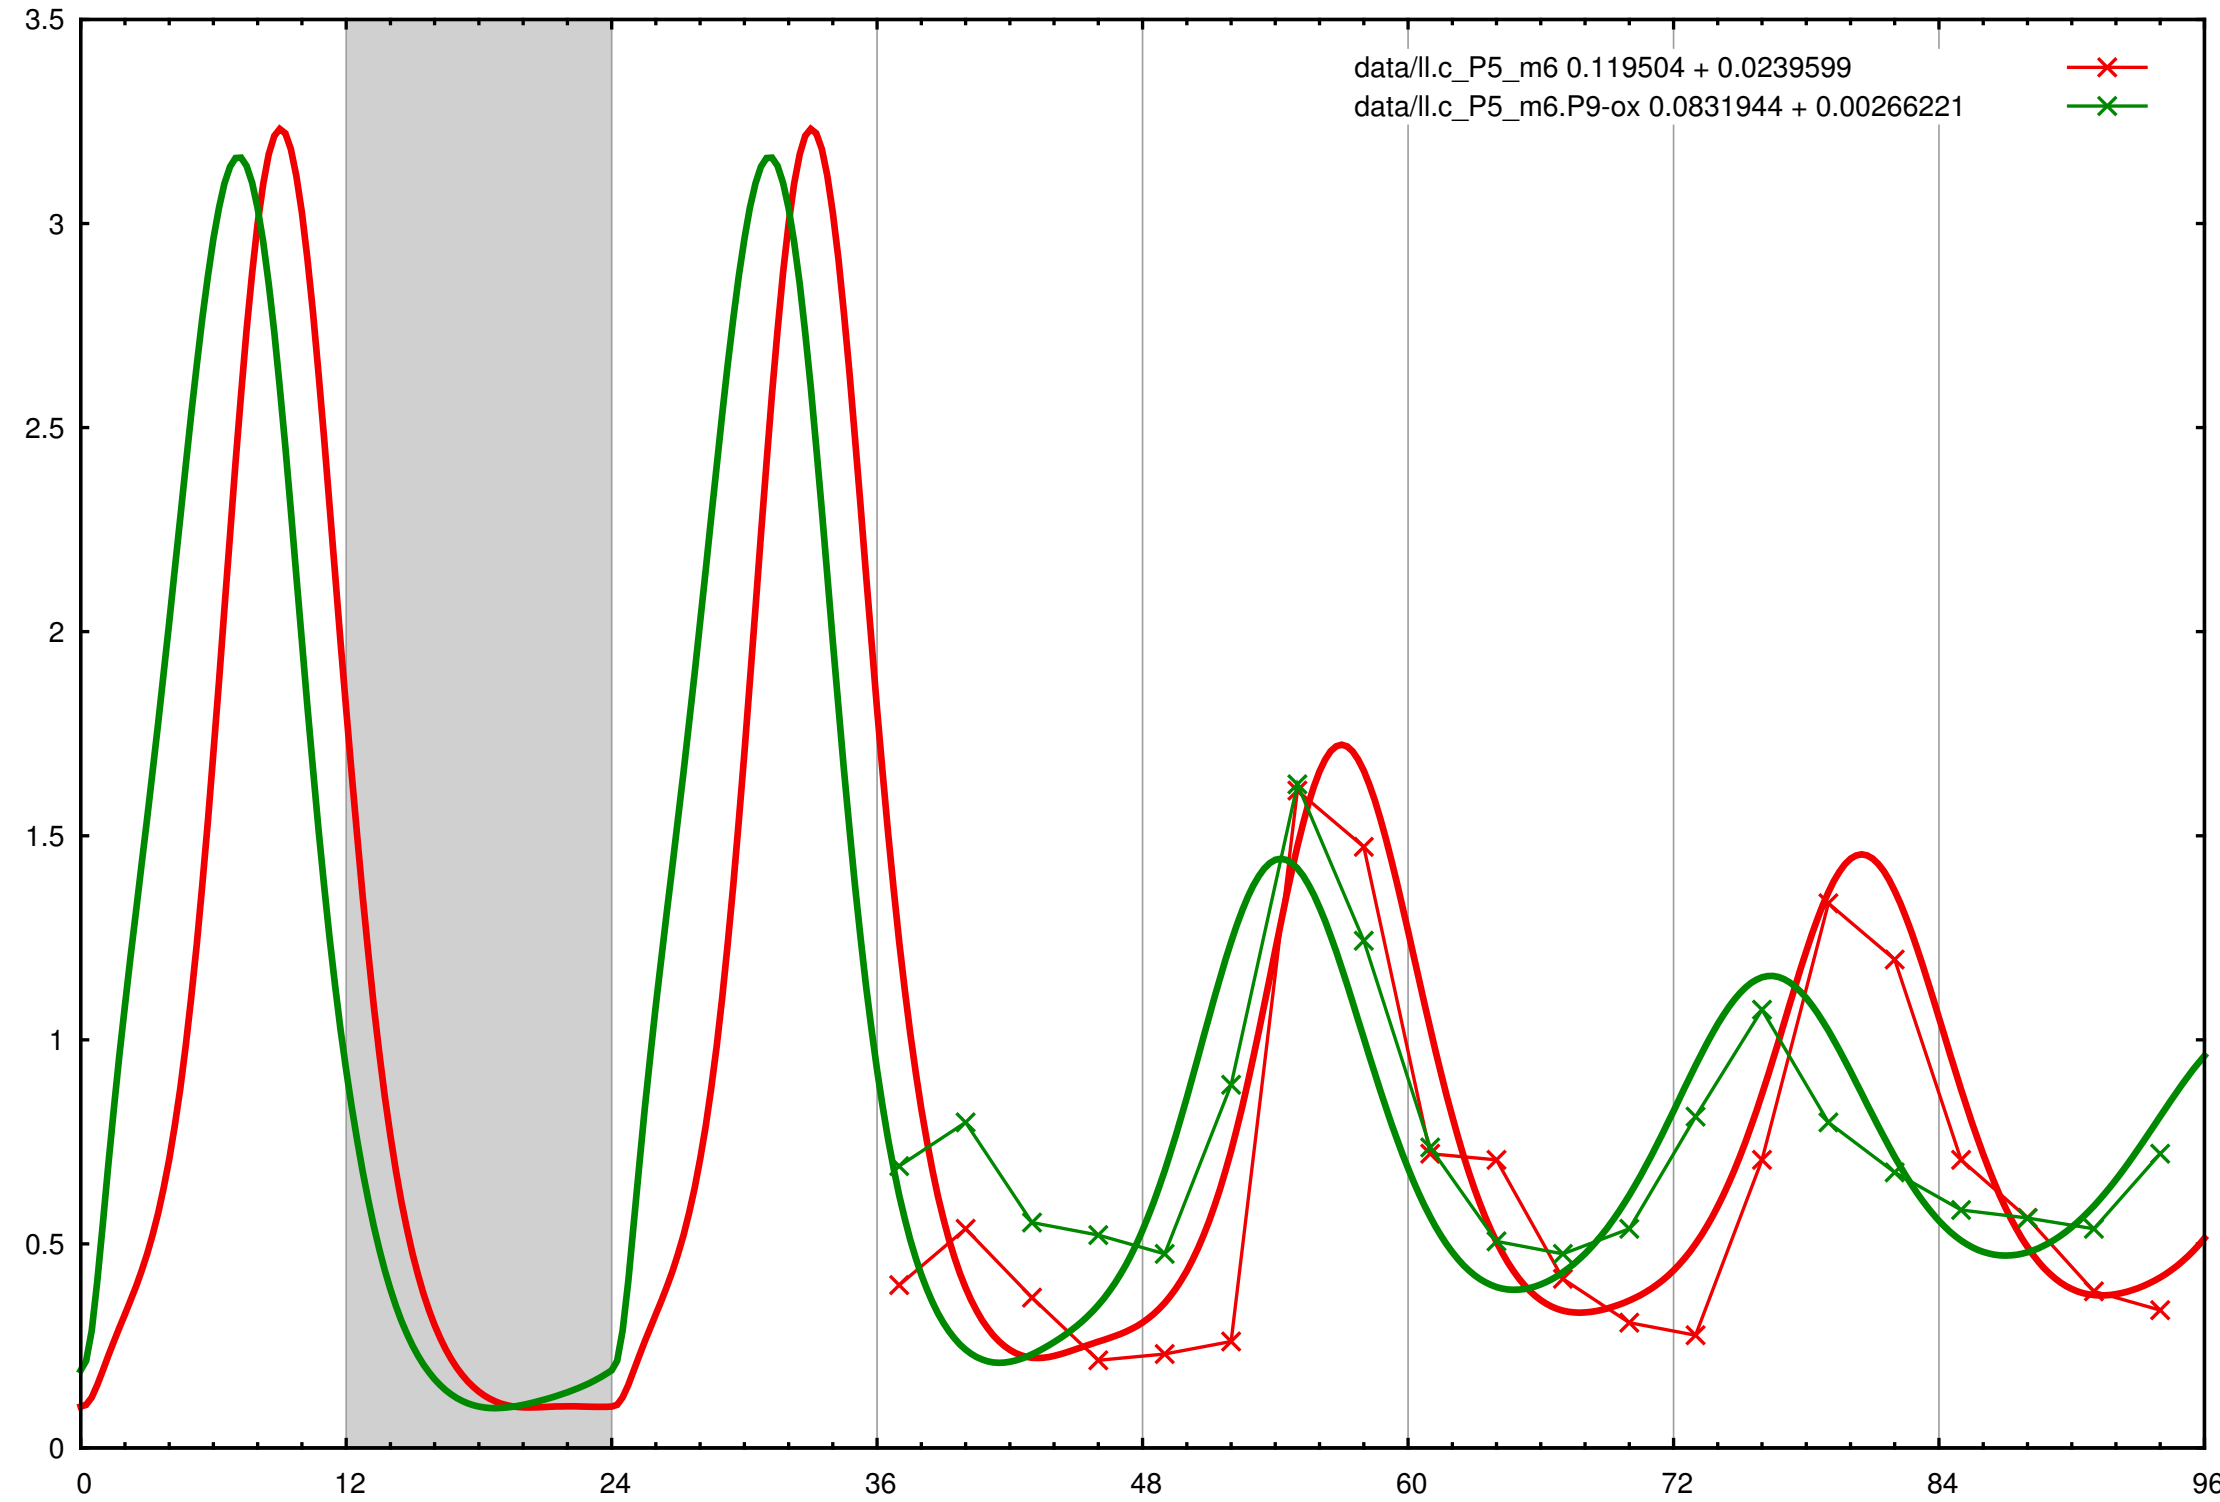

Scale group 96, scost 0.027008

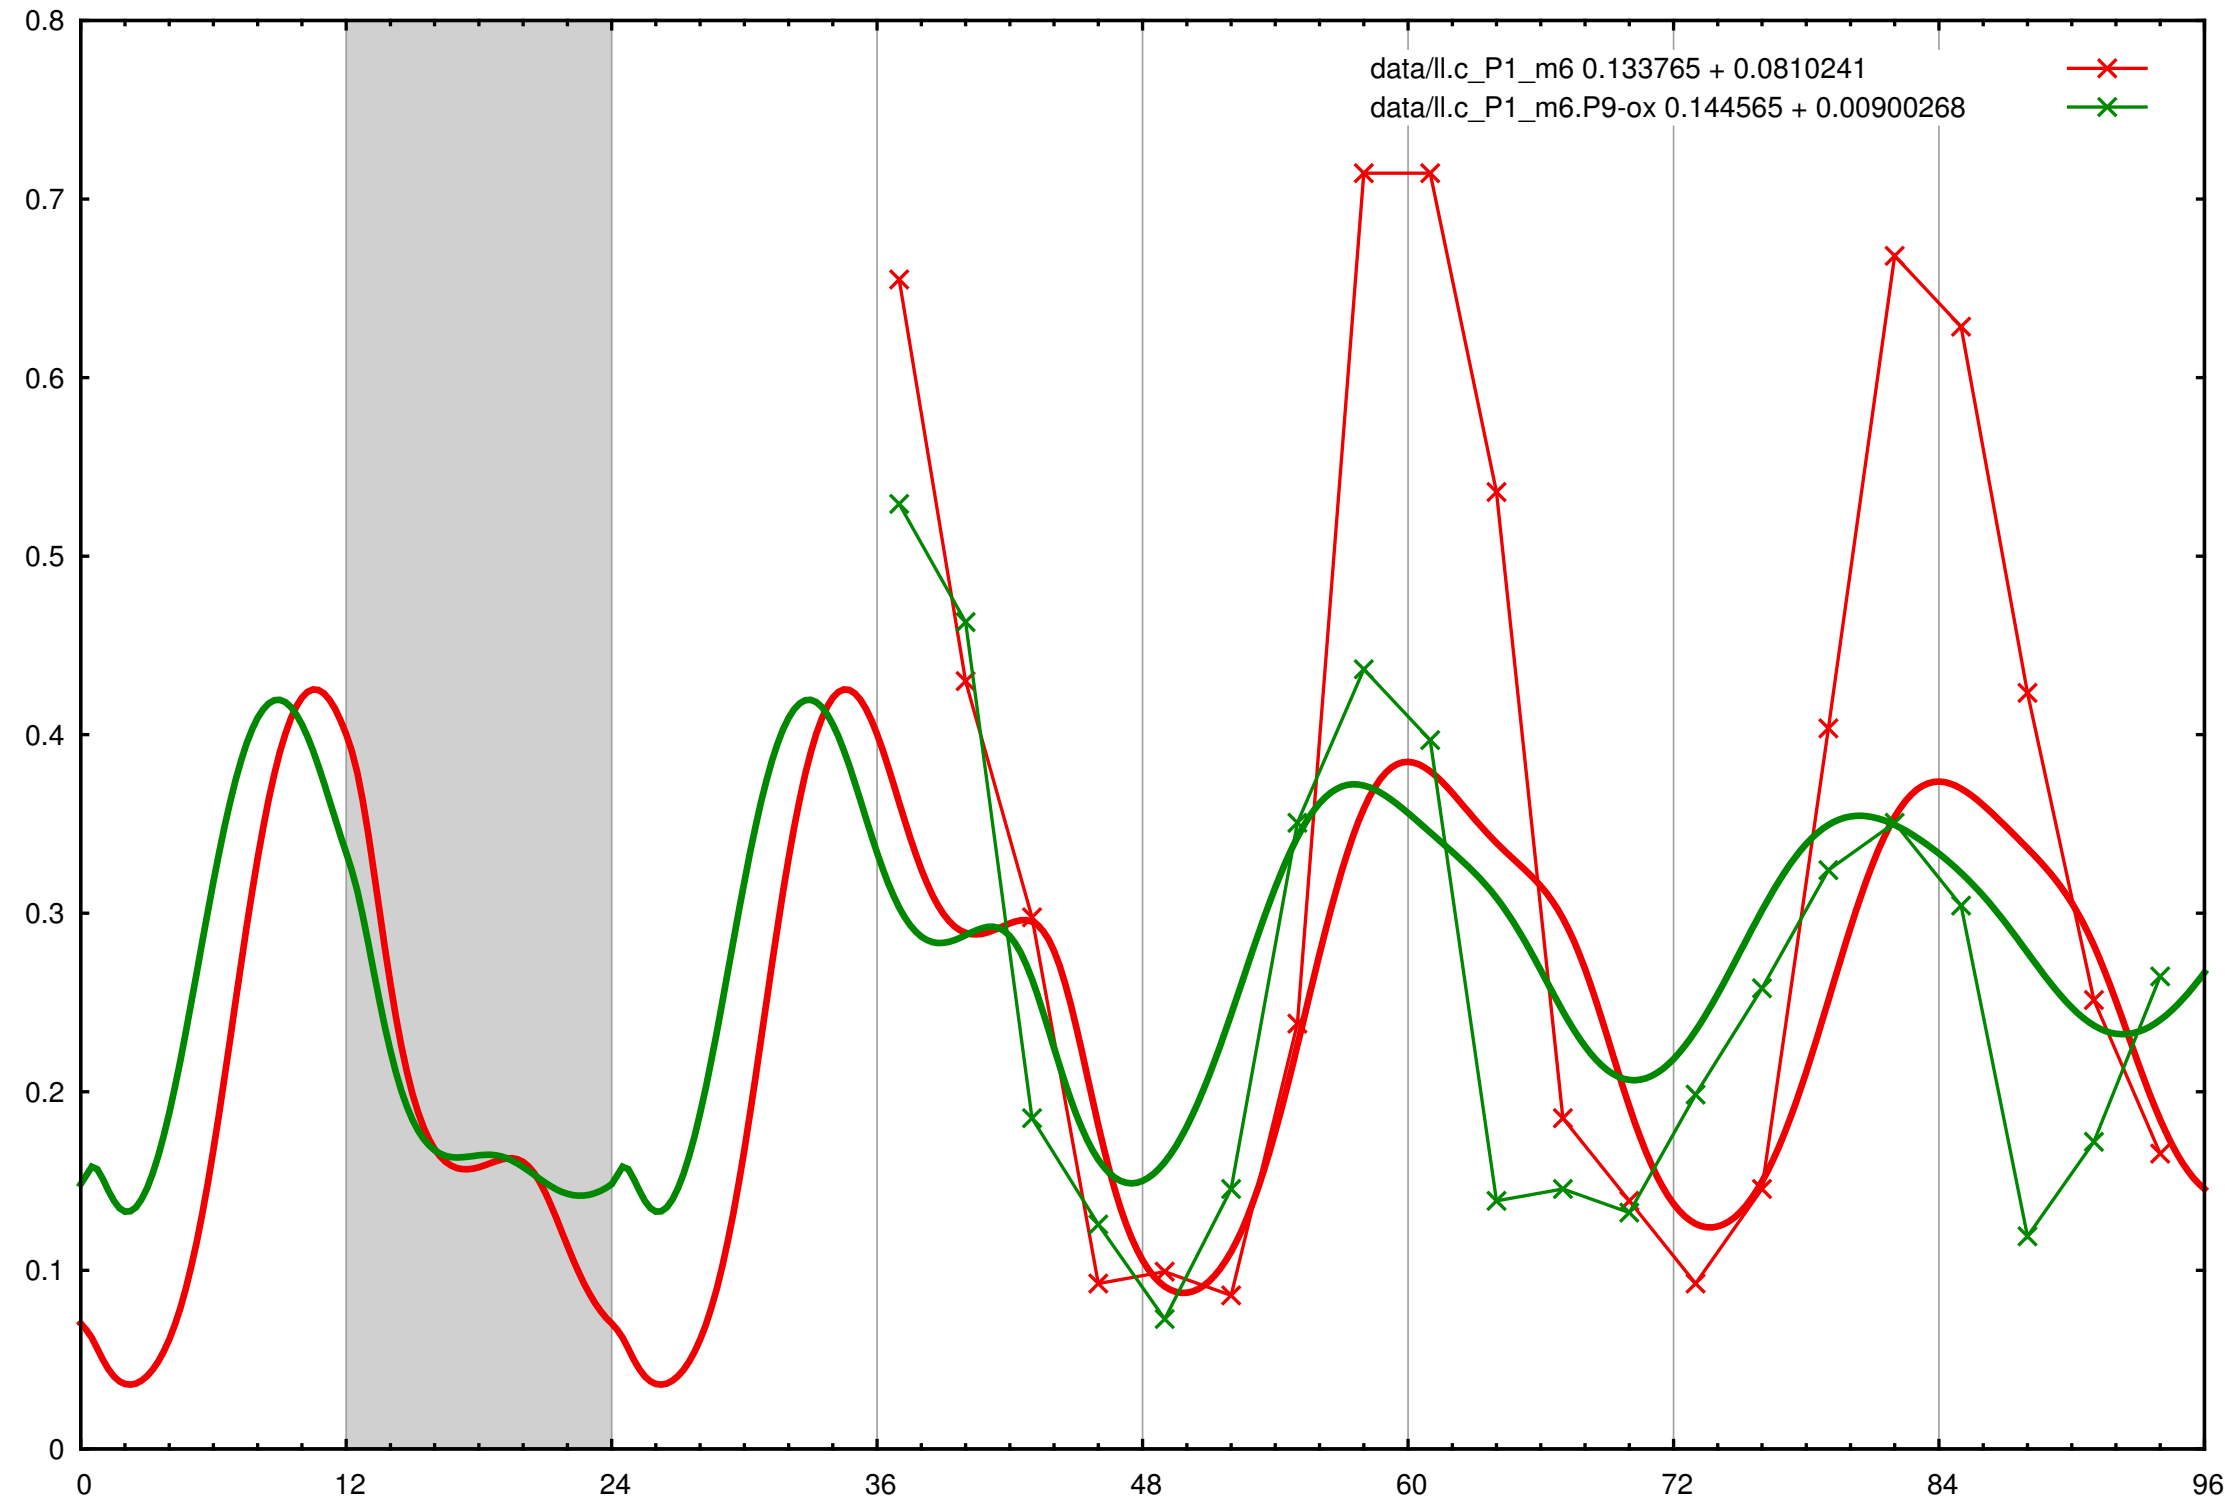



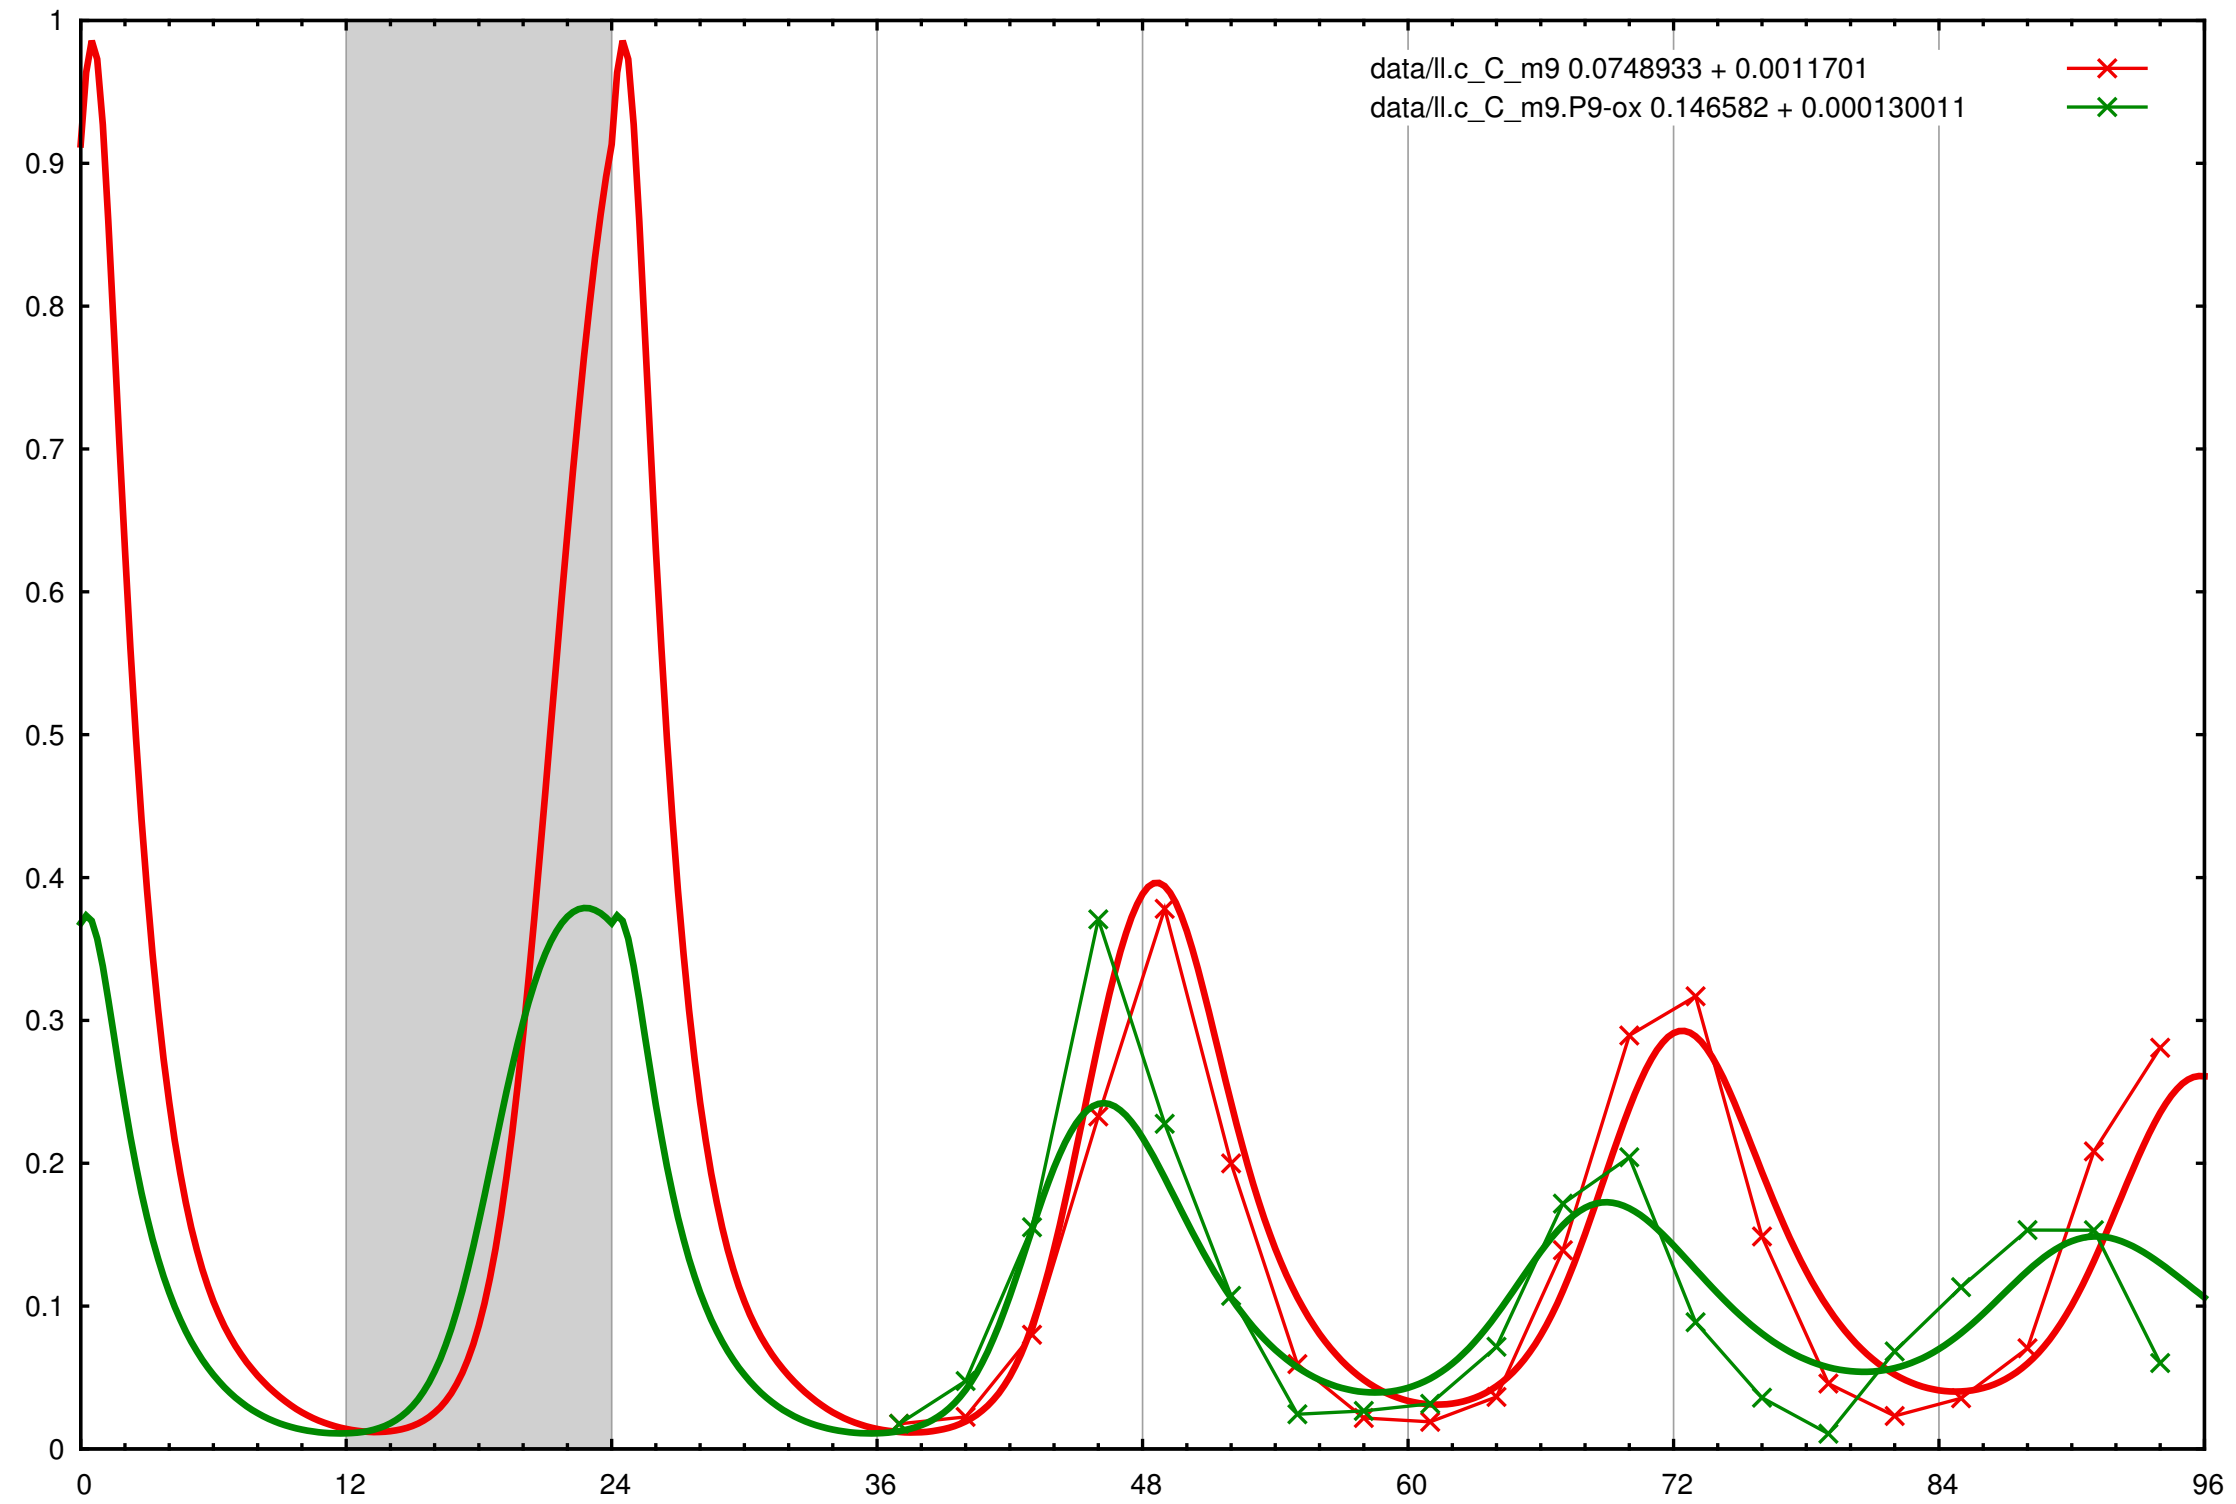

Scale group 98, scost 1.9834e-05

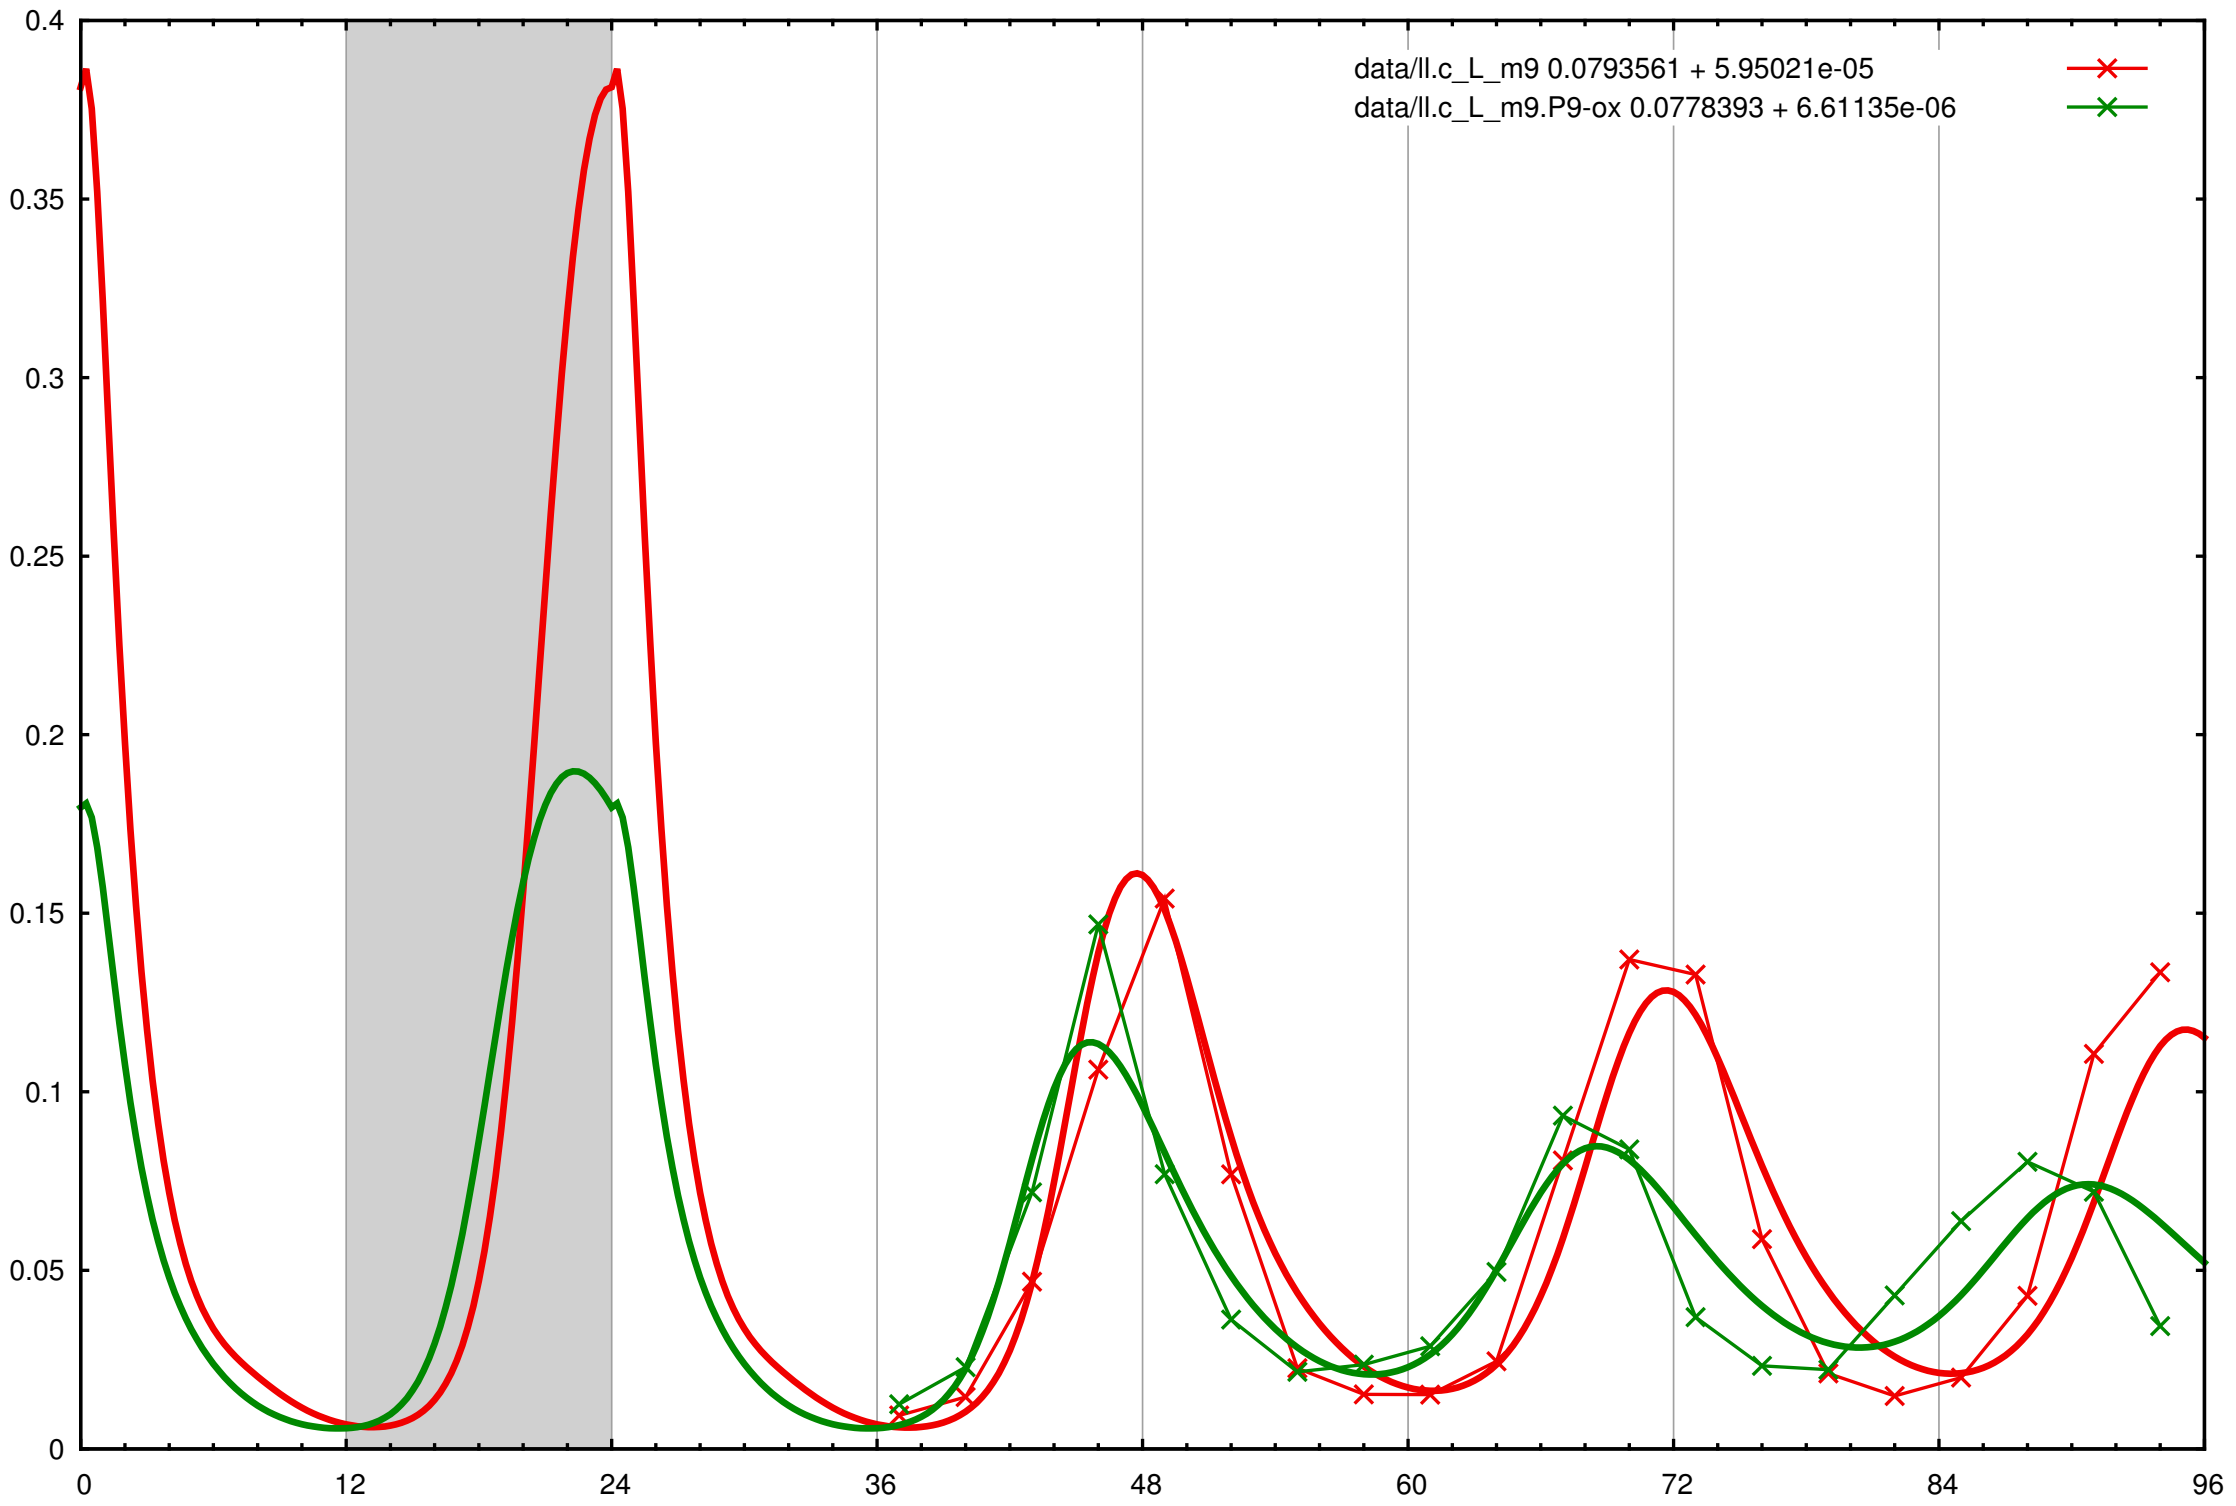

Scale group 99, scost 0.00347458

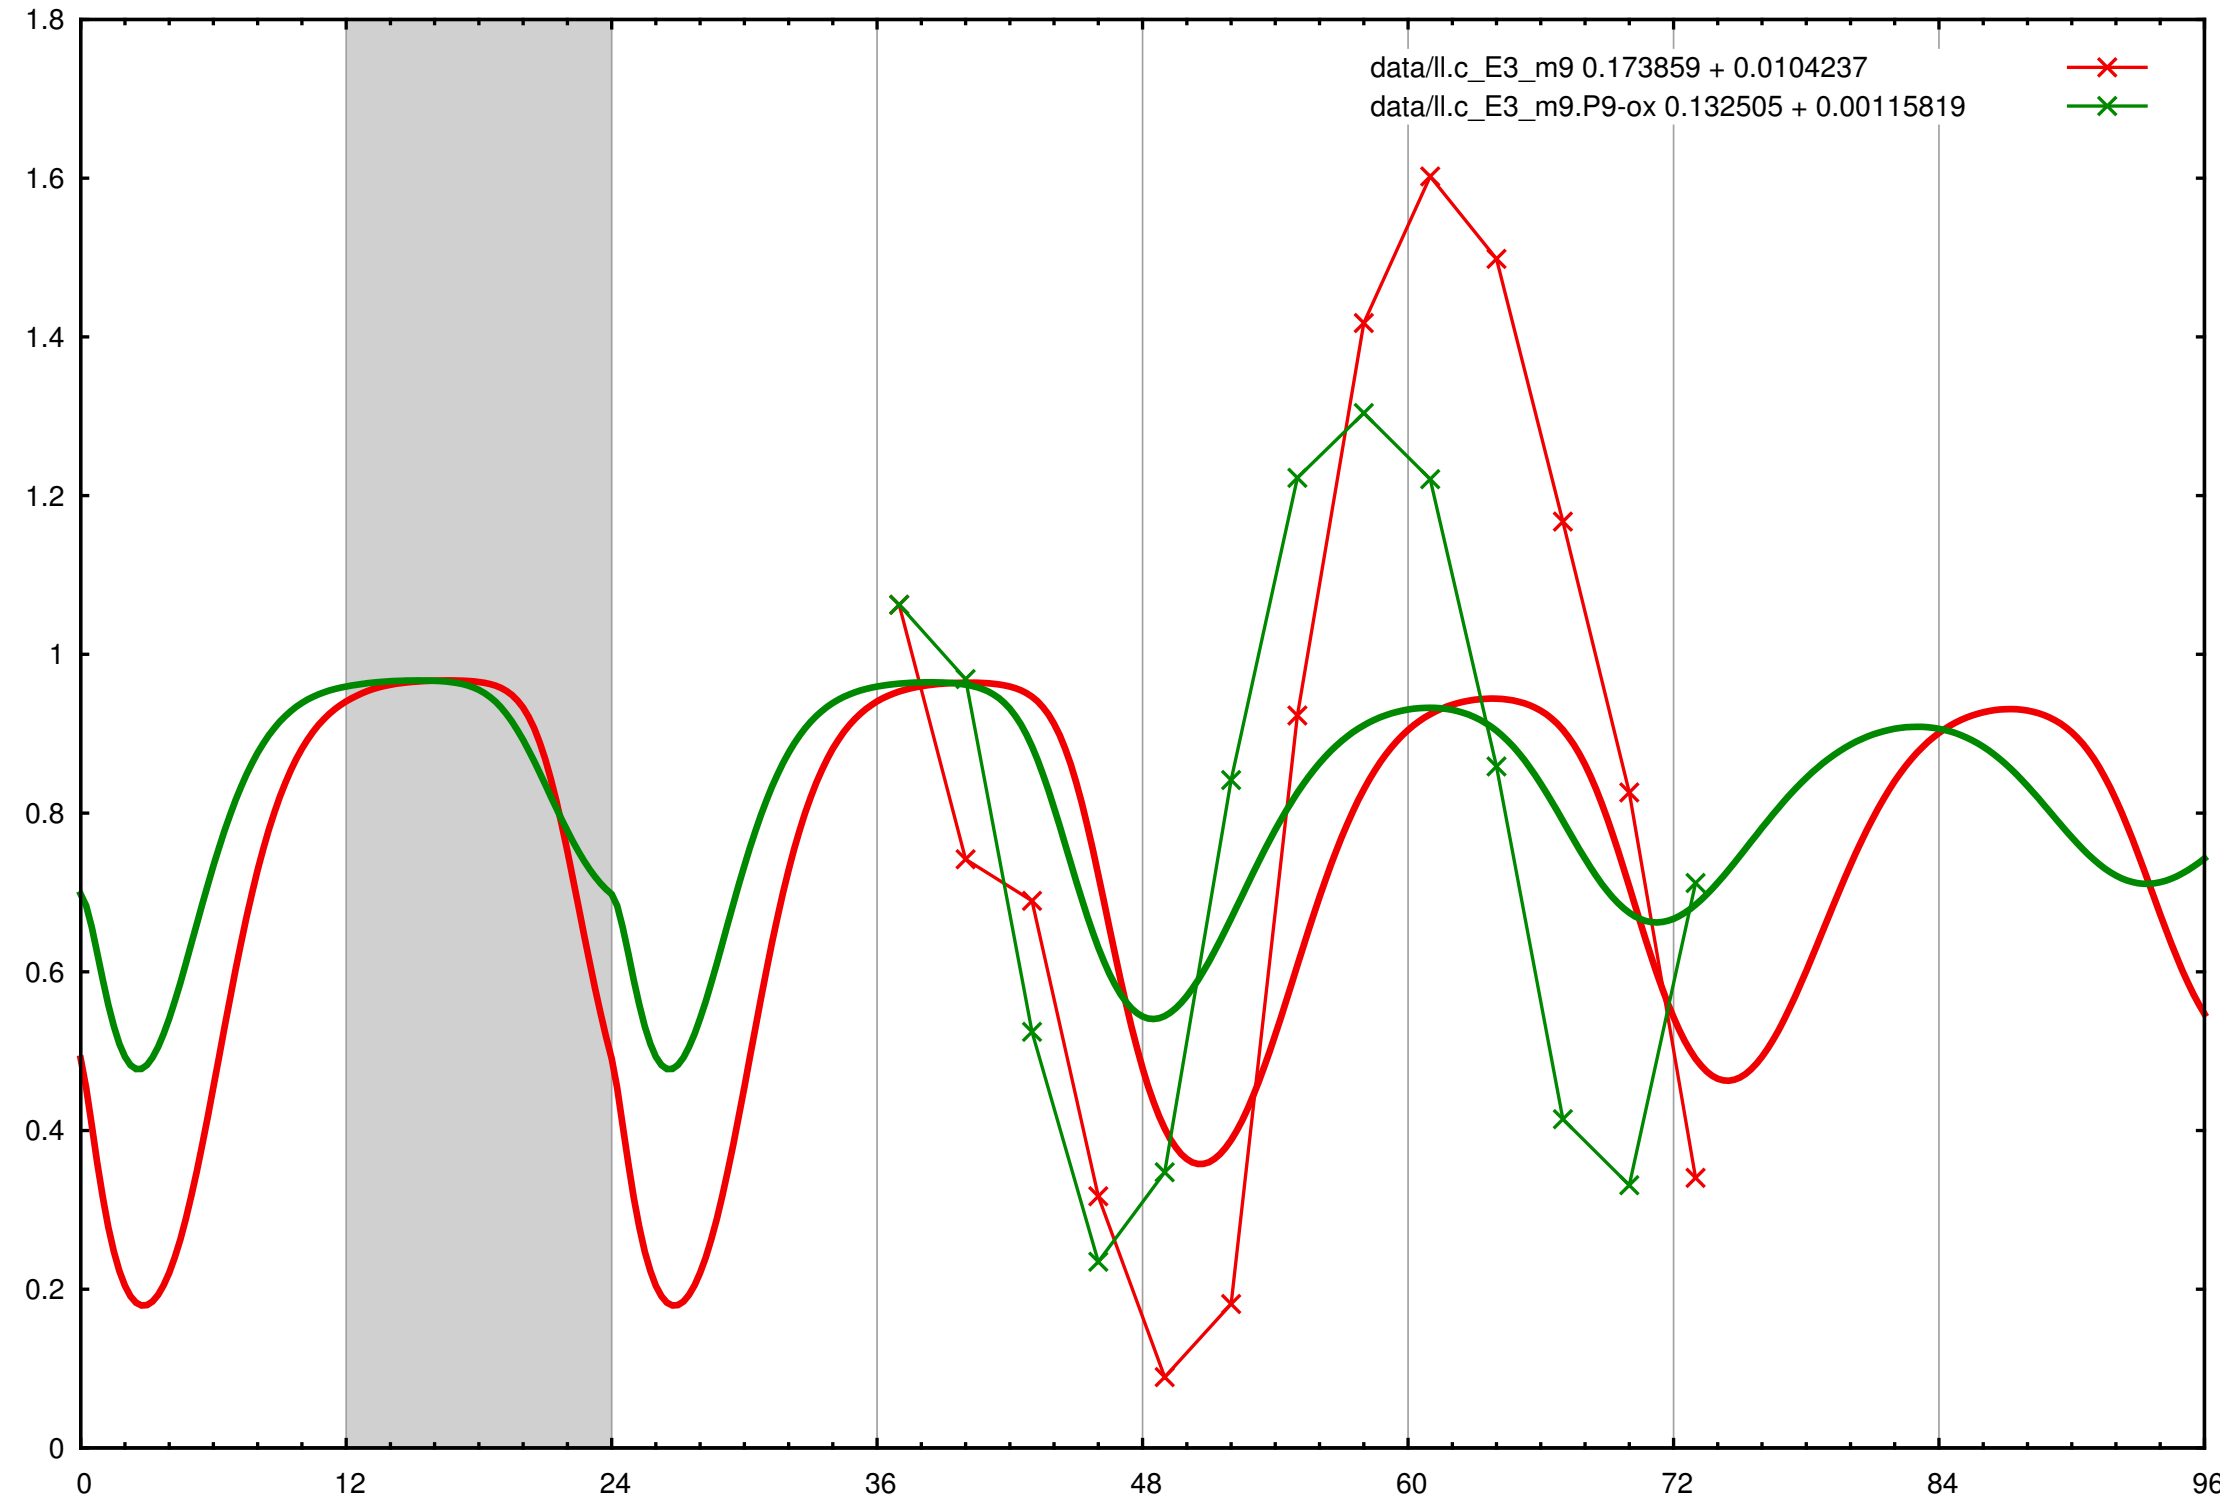

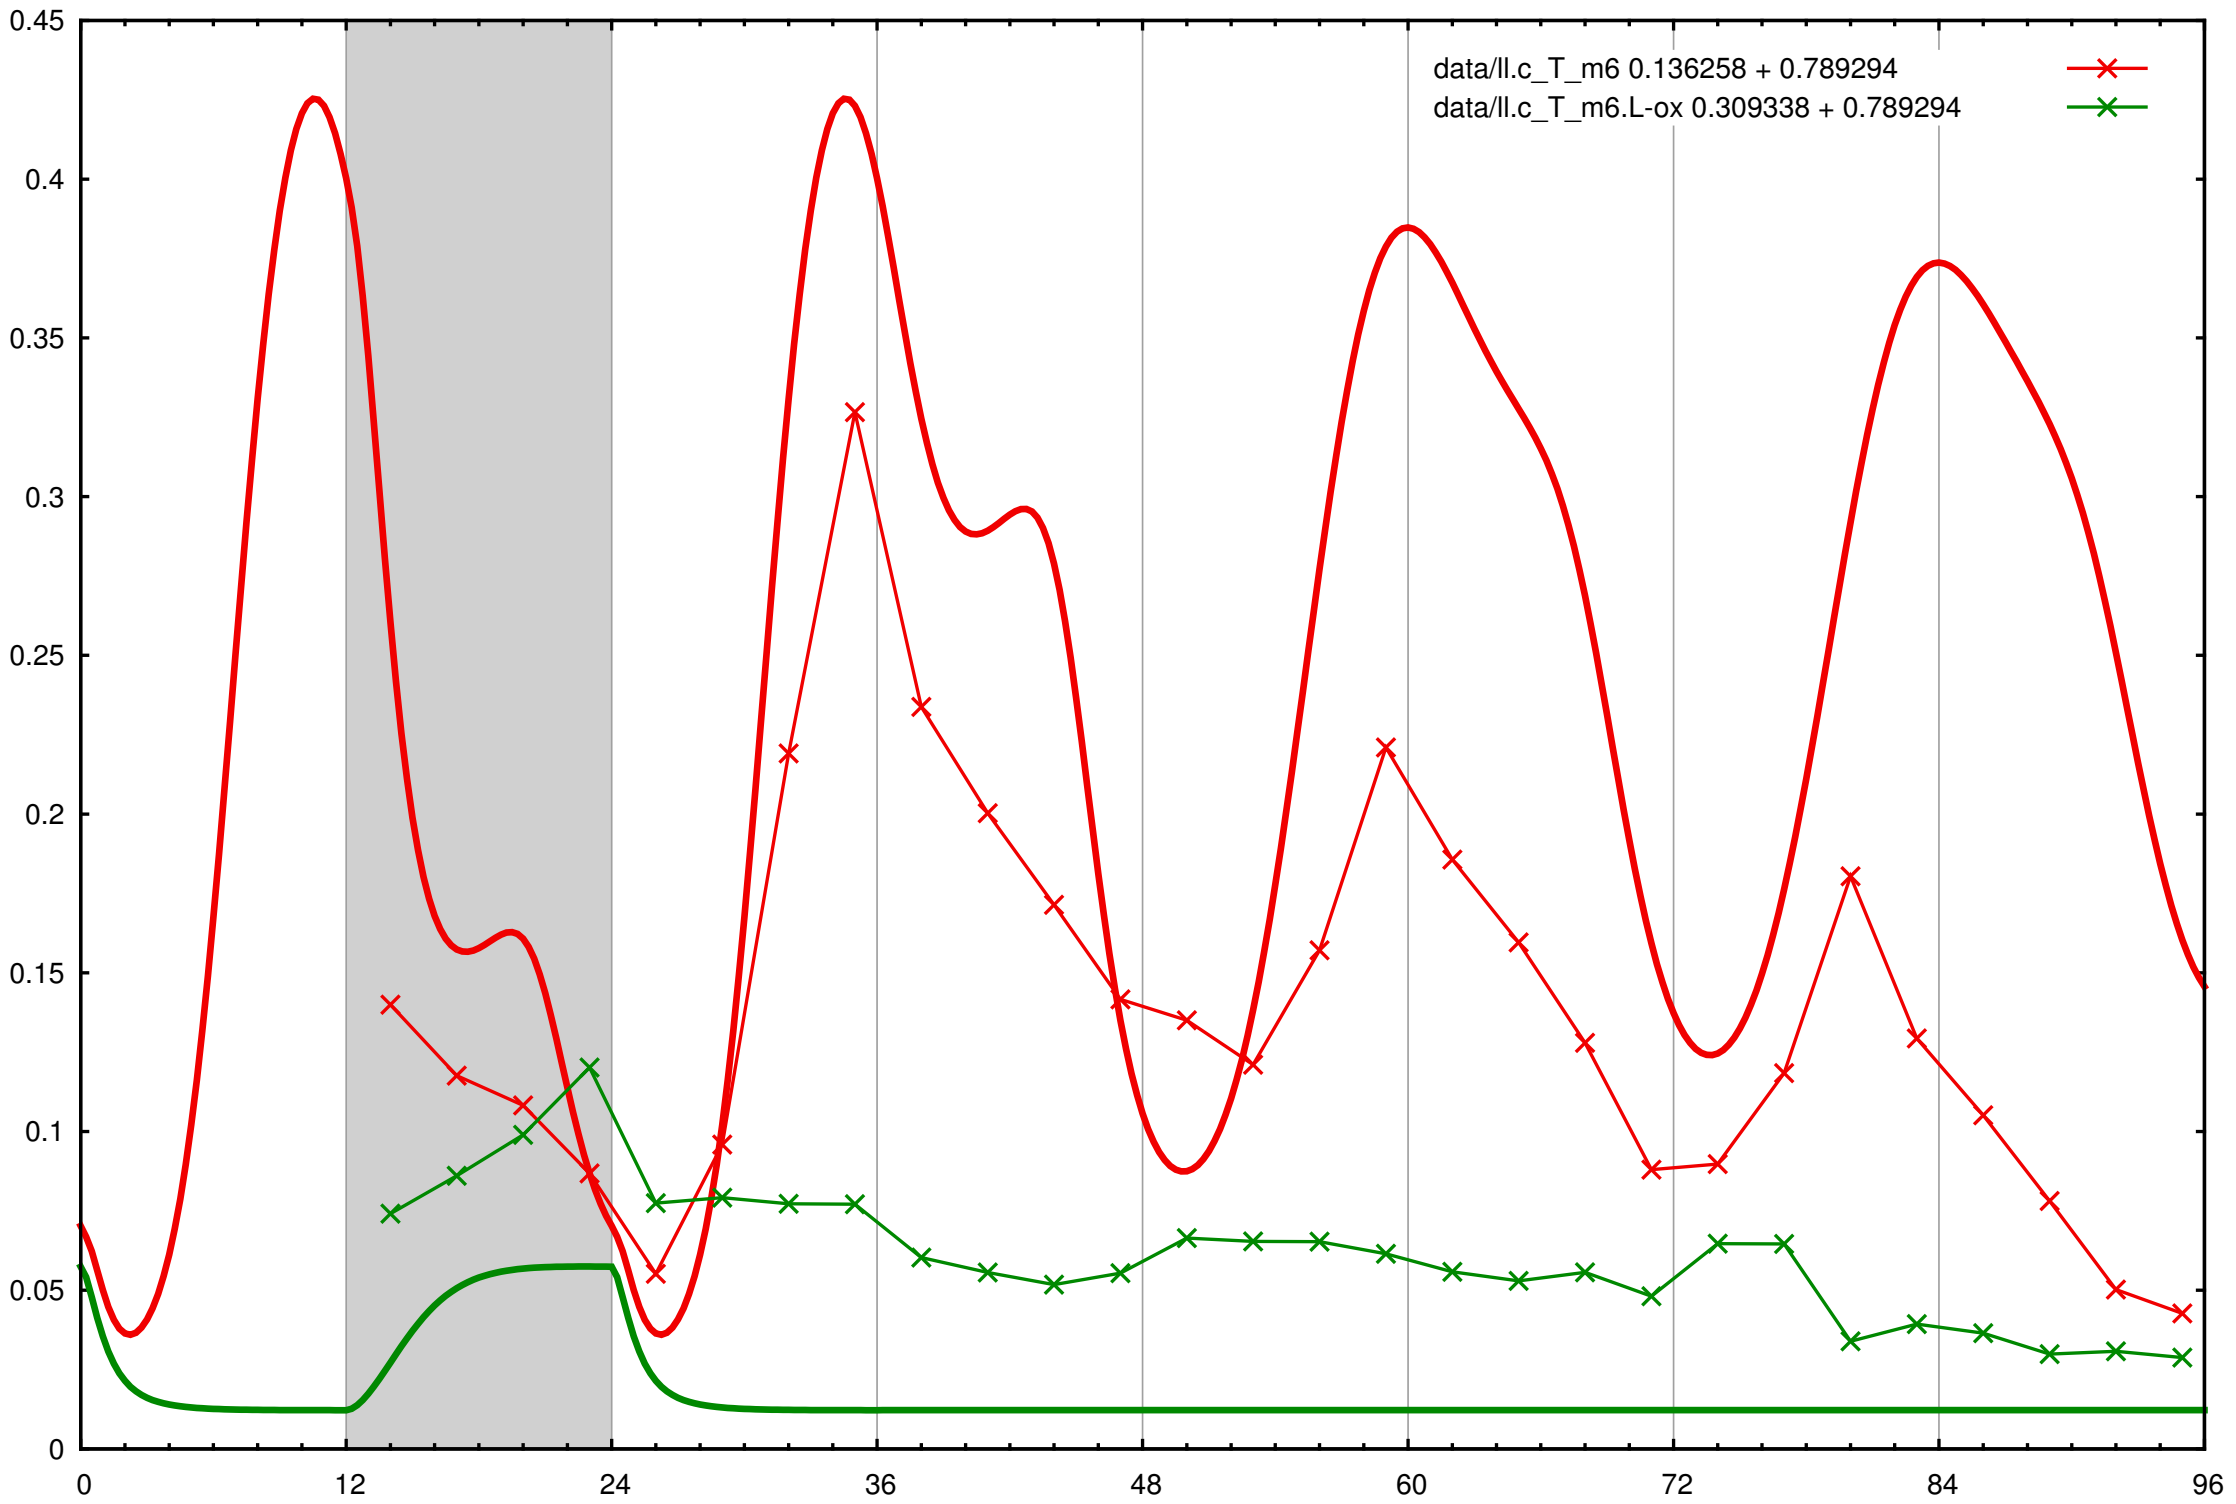

Scale group 101, scost 0.0107709

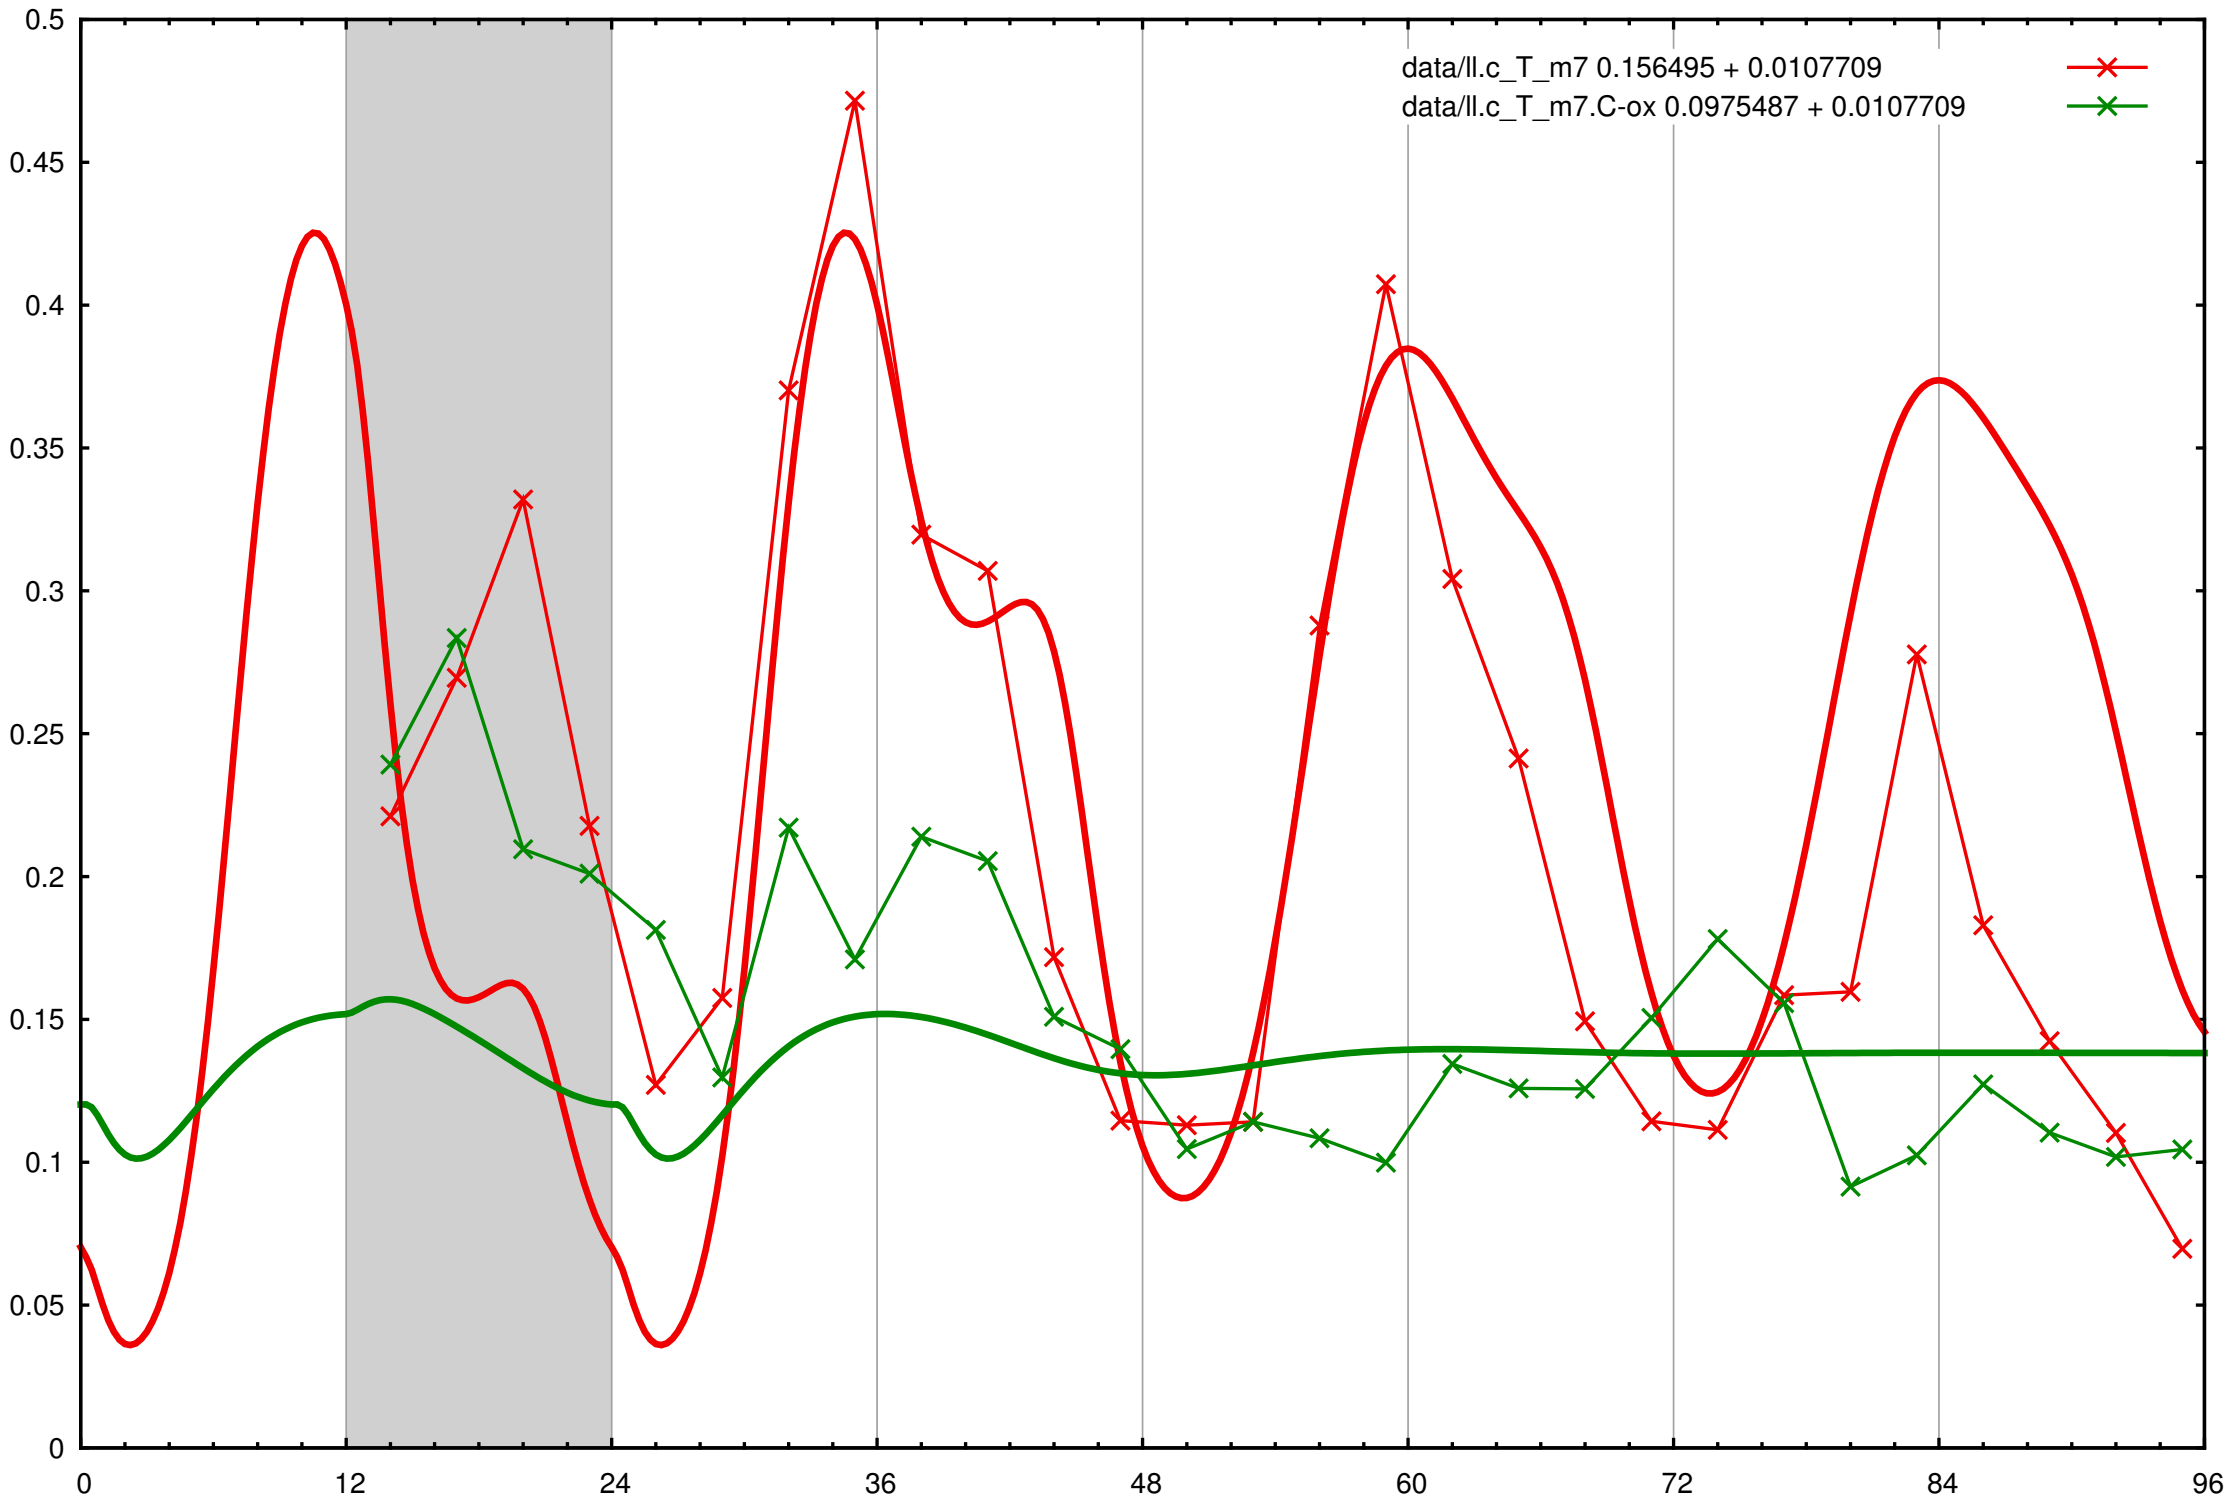

Scale group 102, scost 0.104802

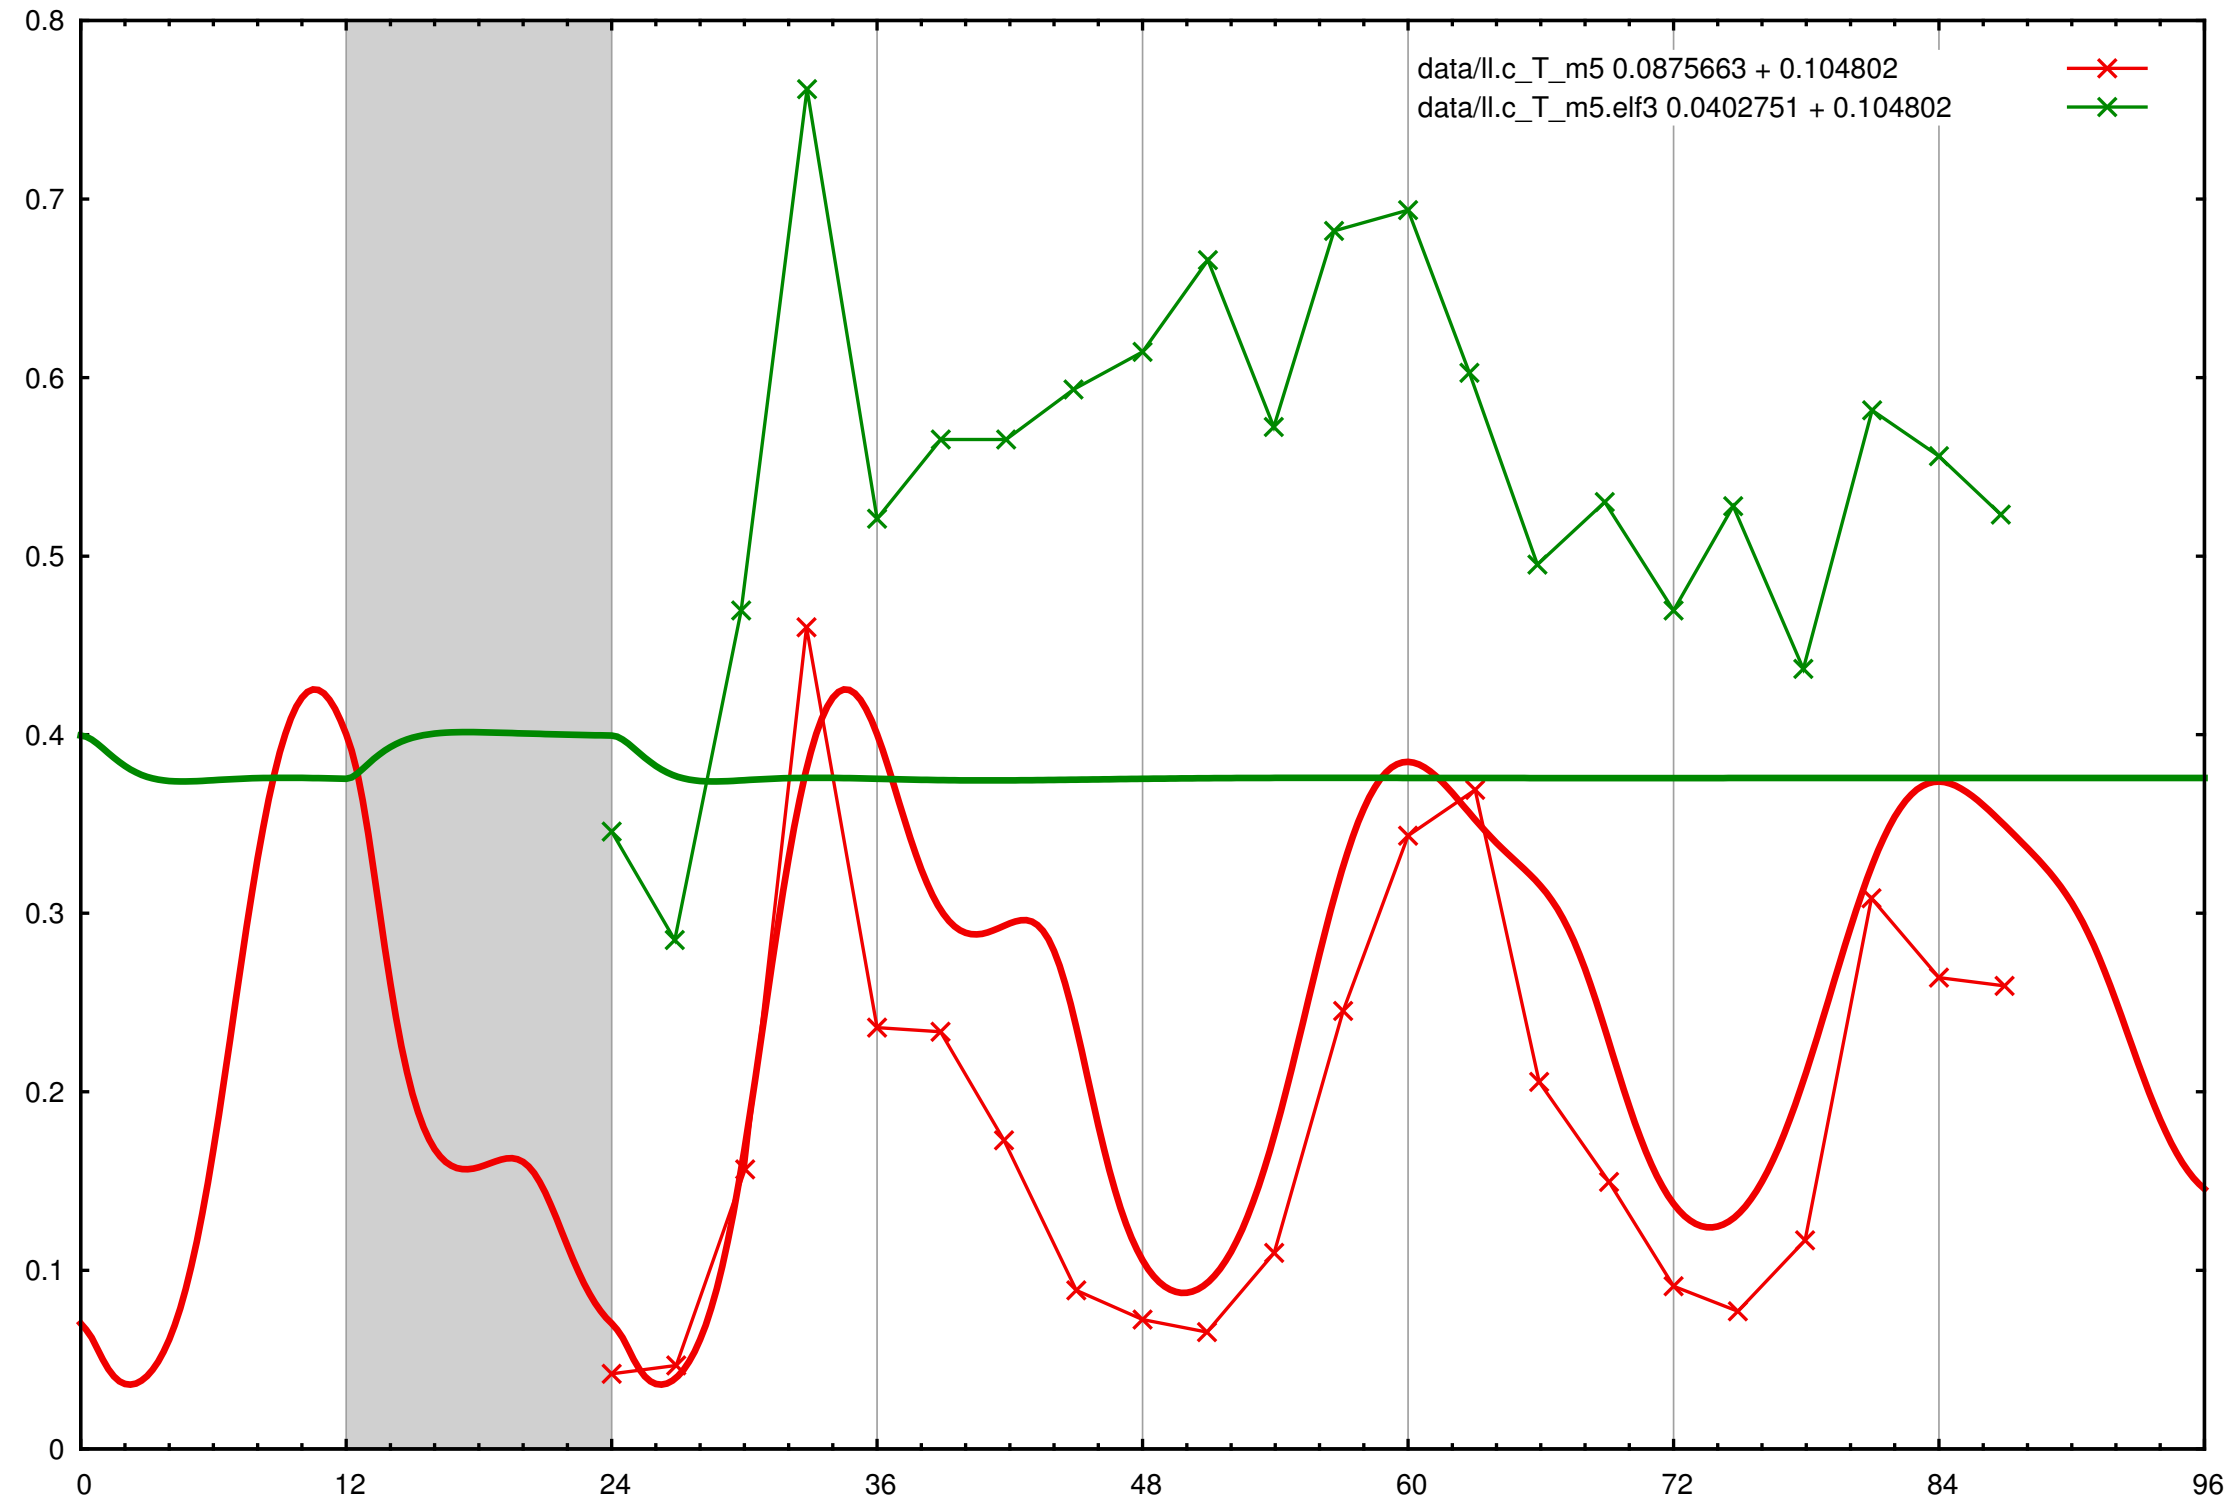

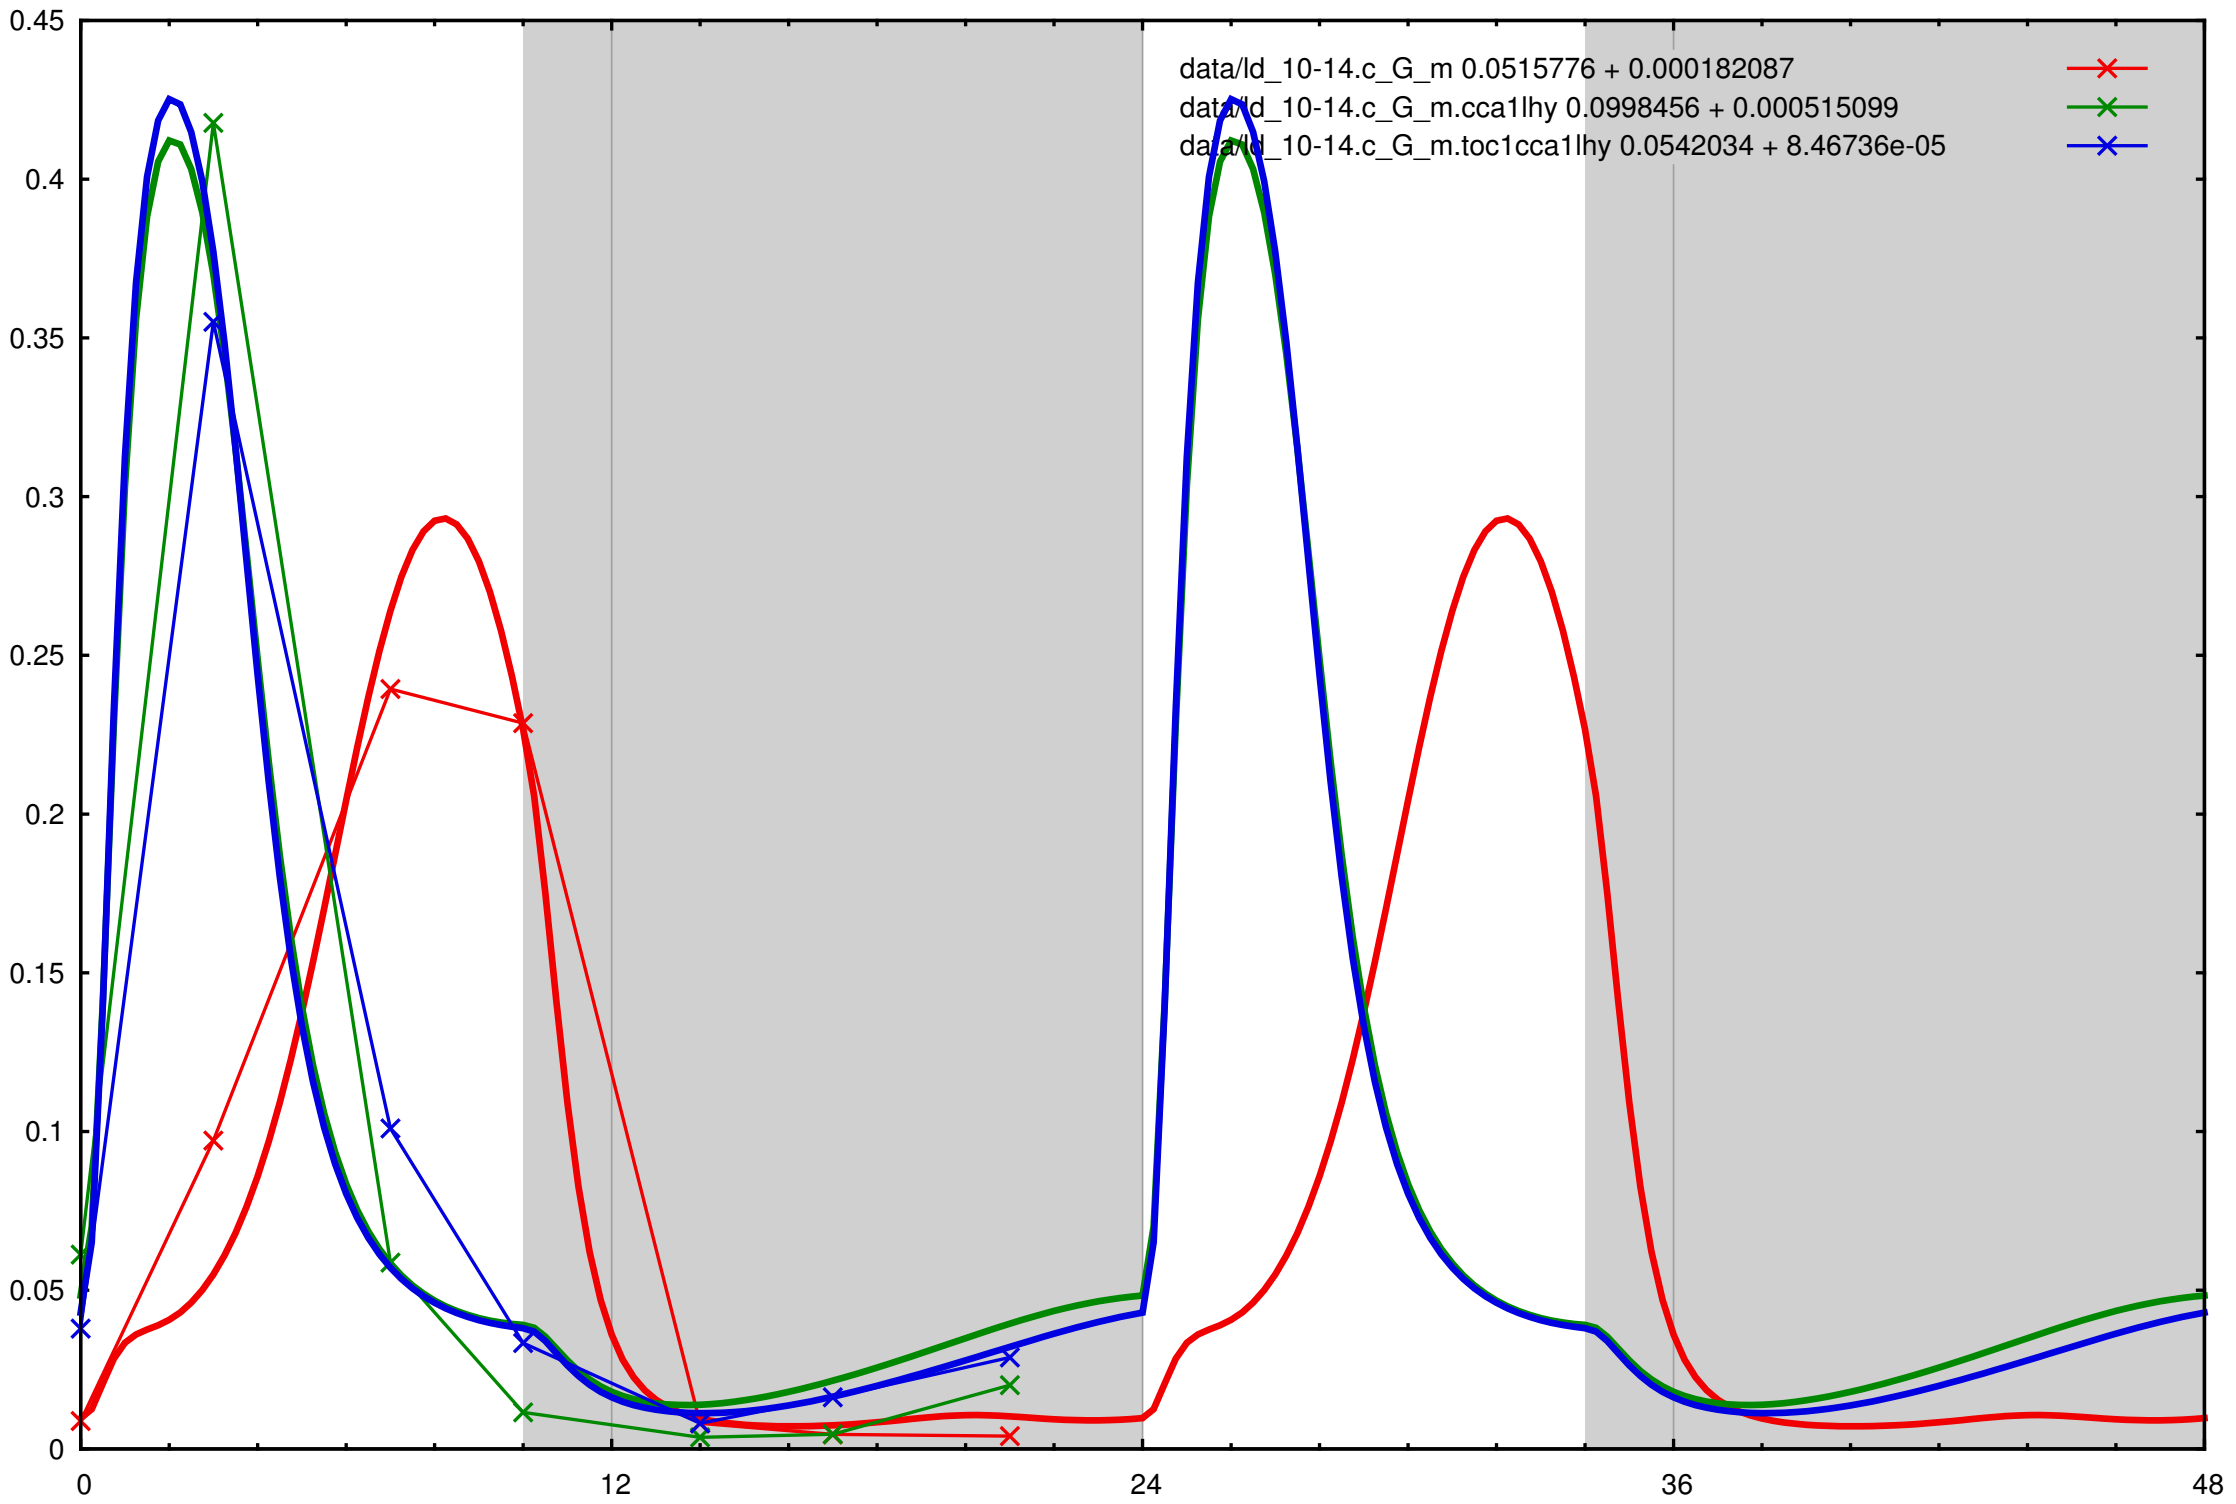

Scale group 104, scost 0.111575

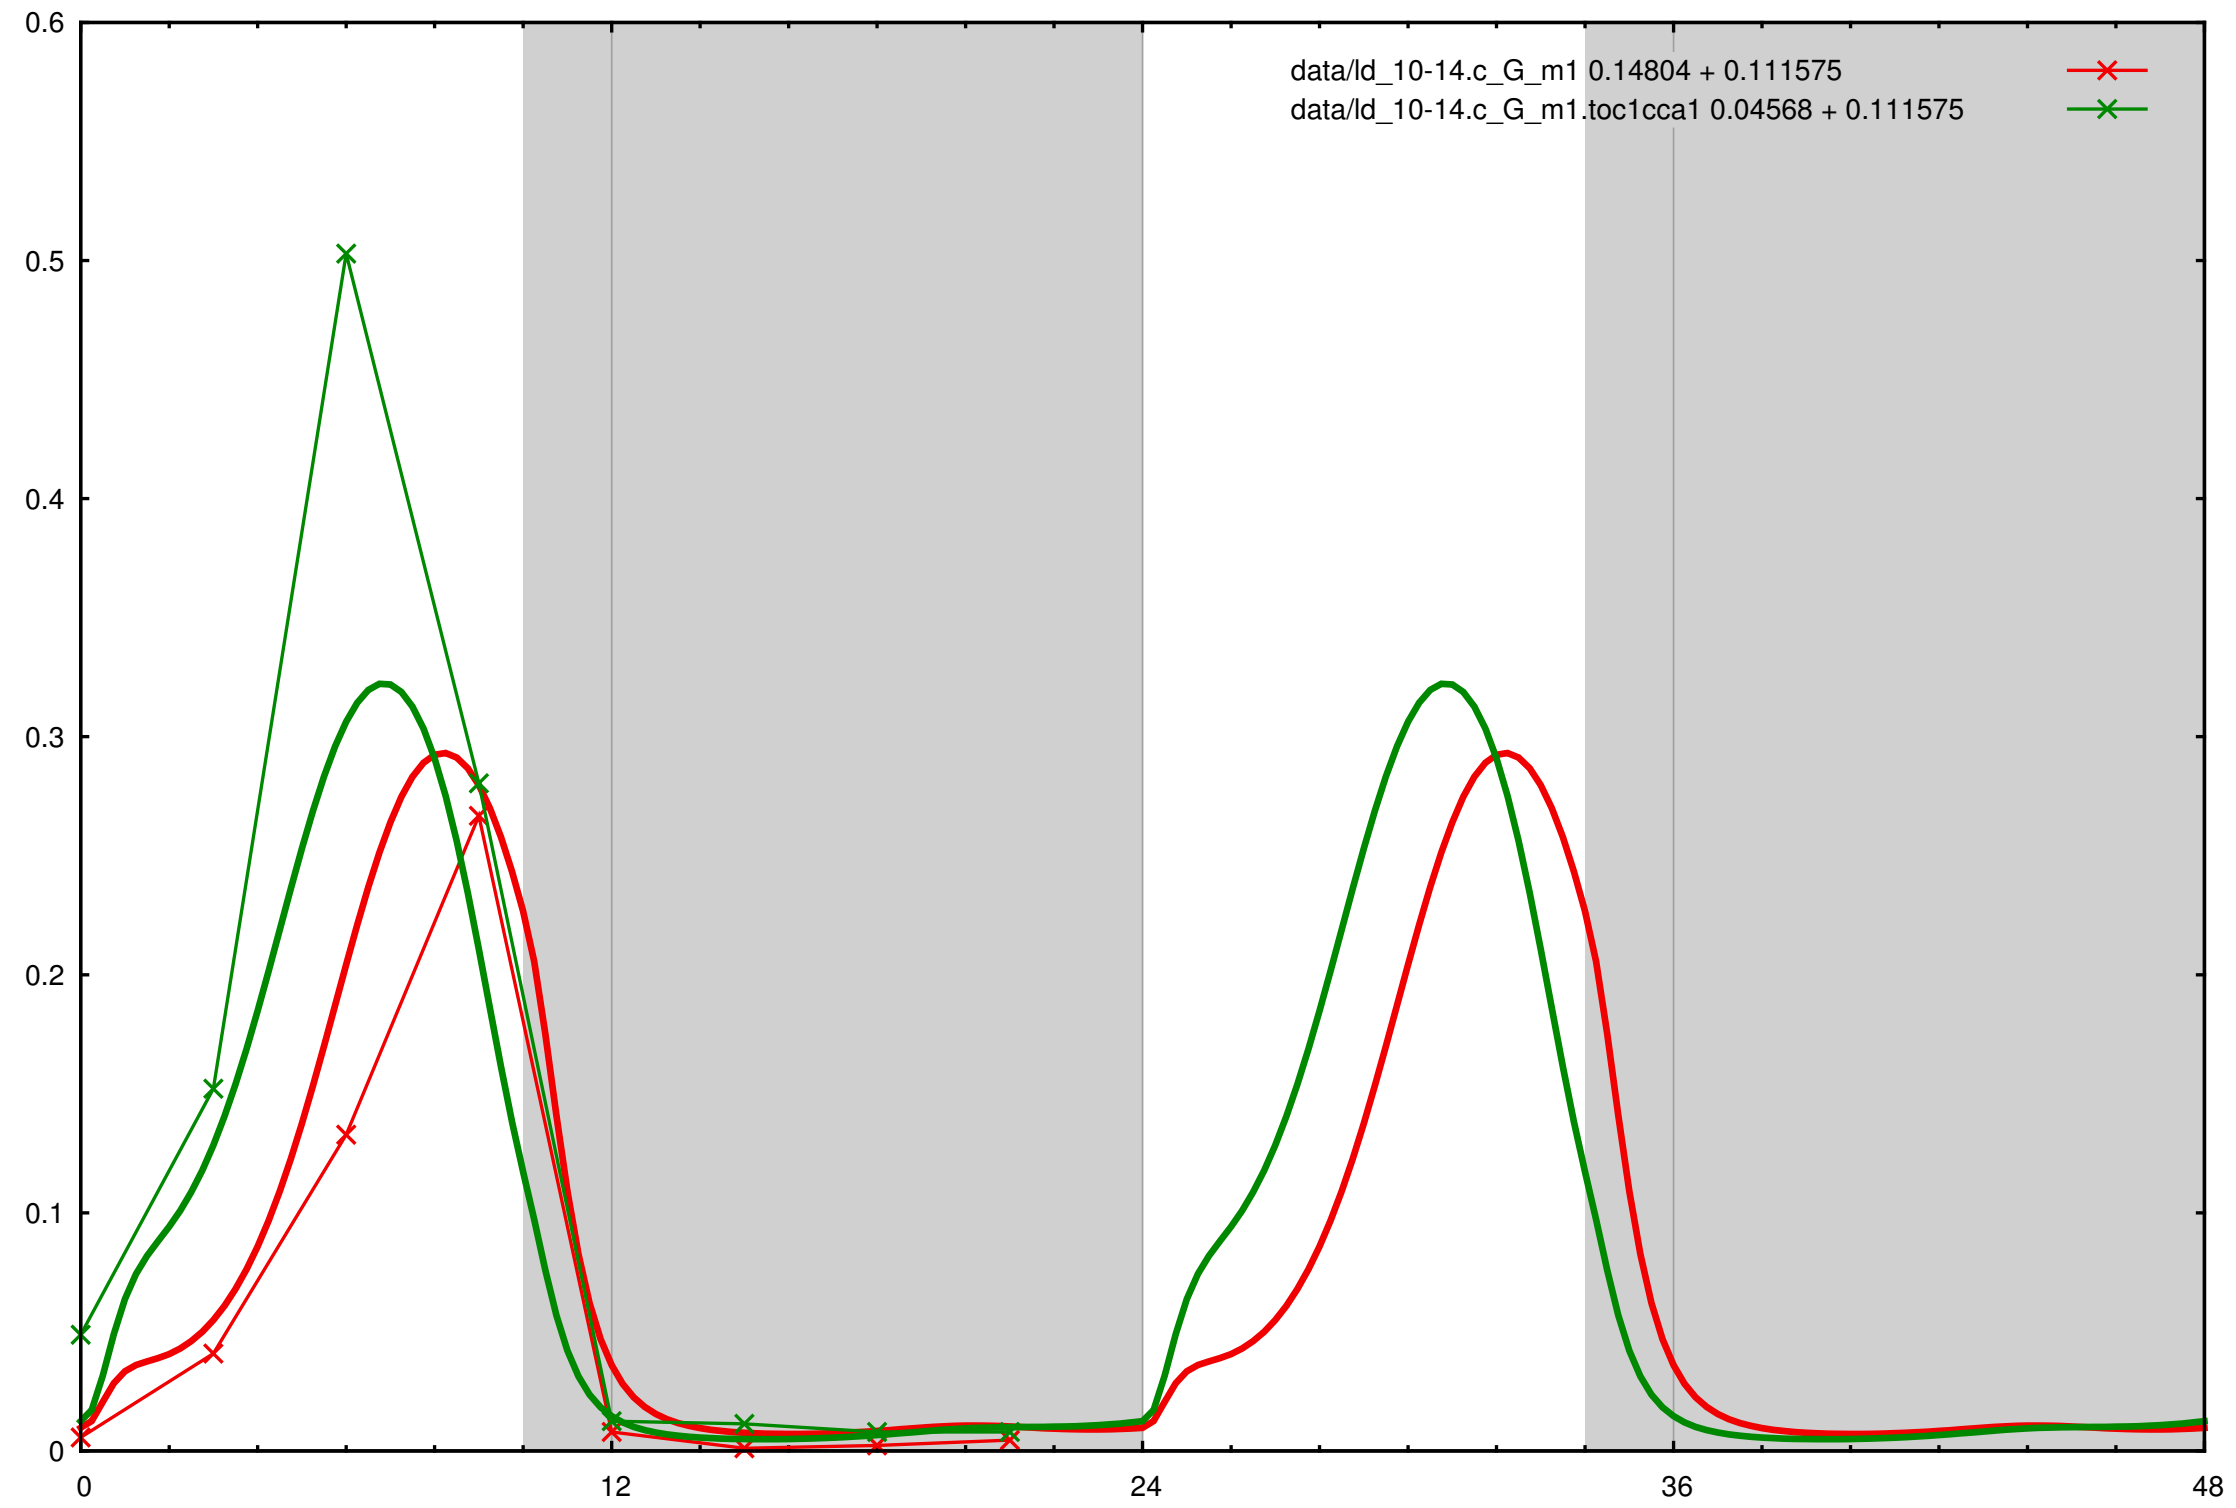



Scale group 105, scost 0.0289365

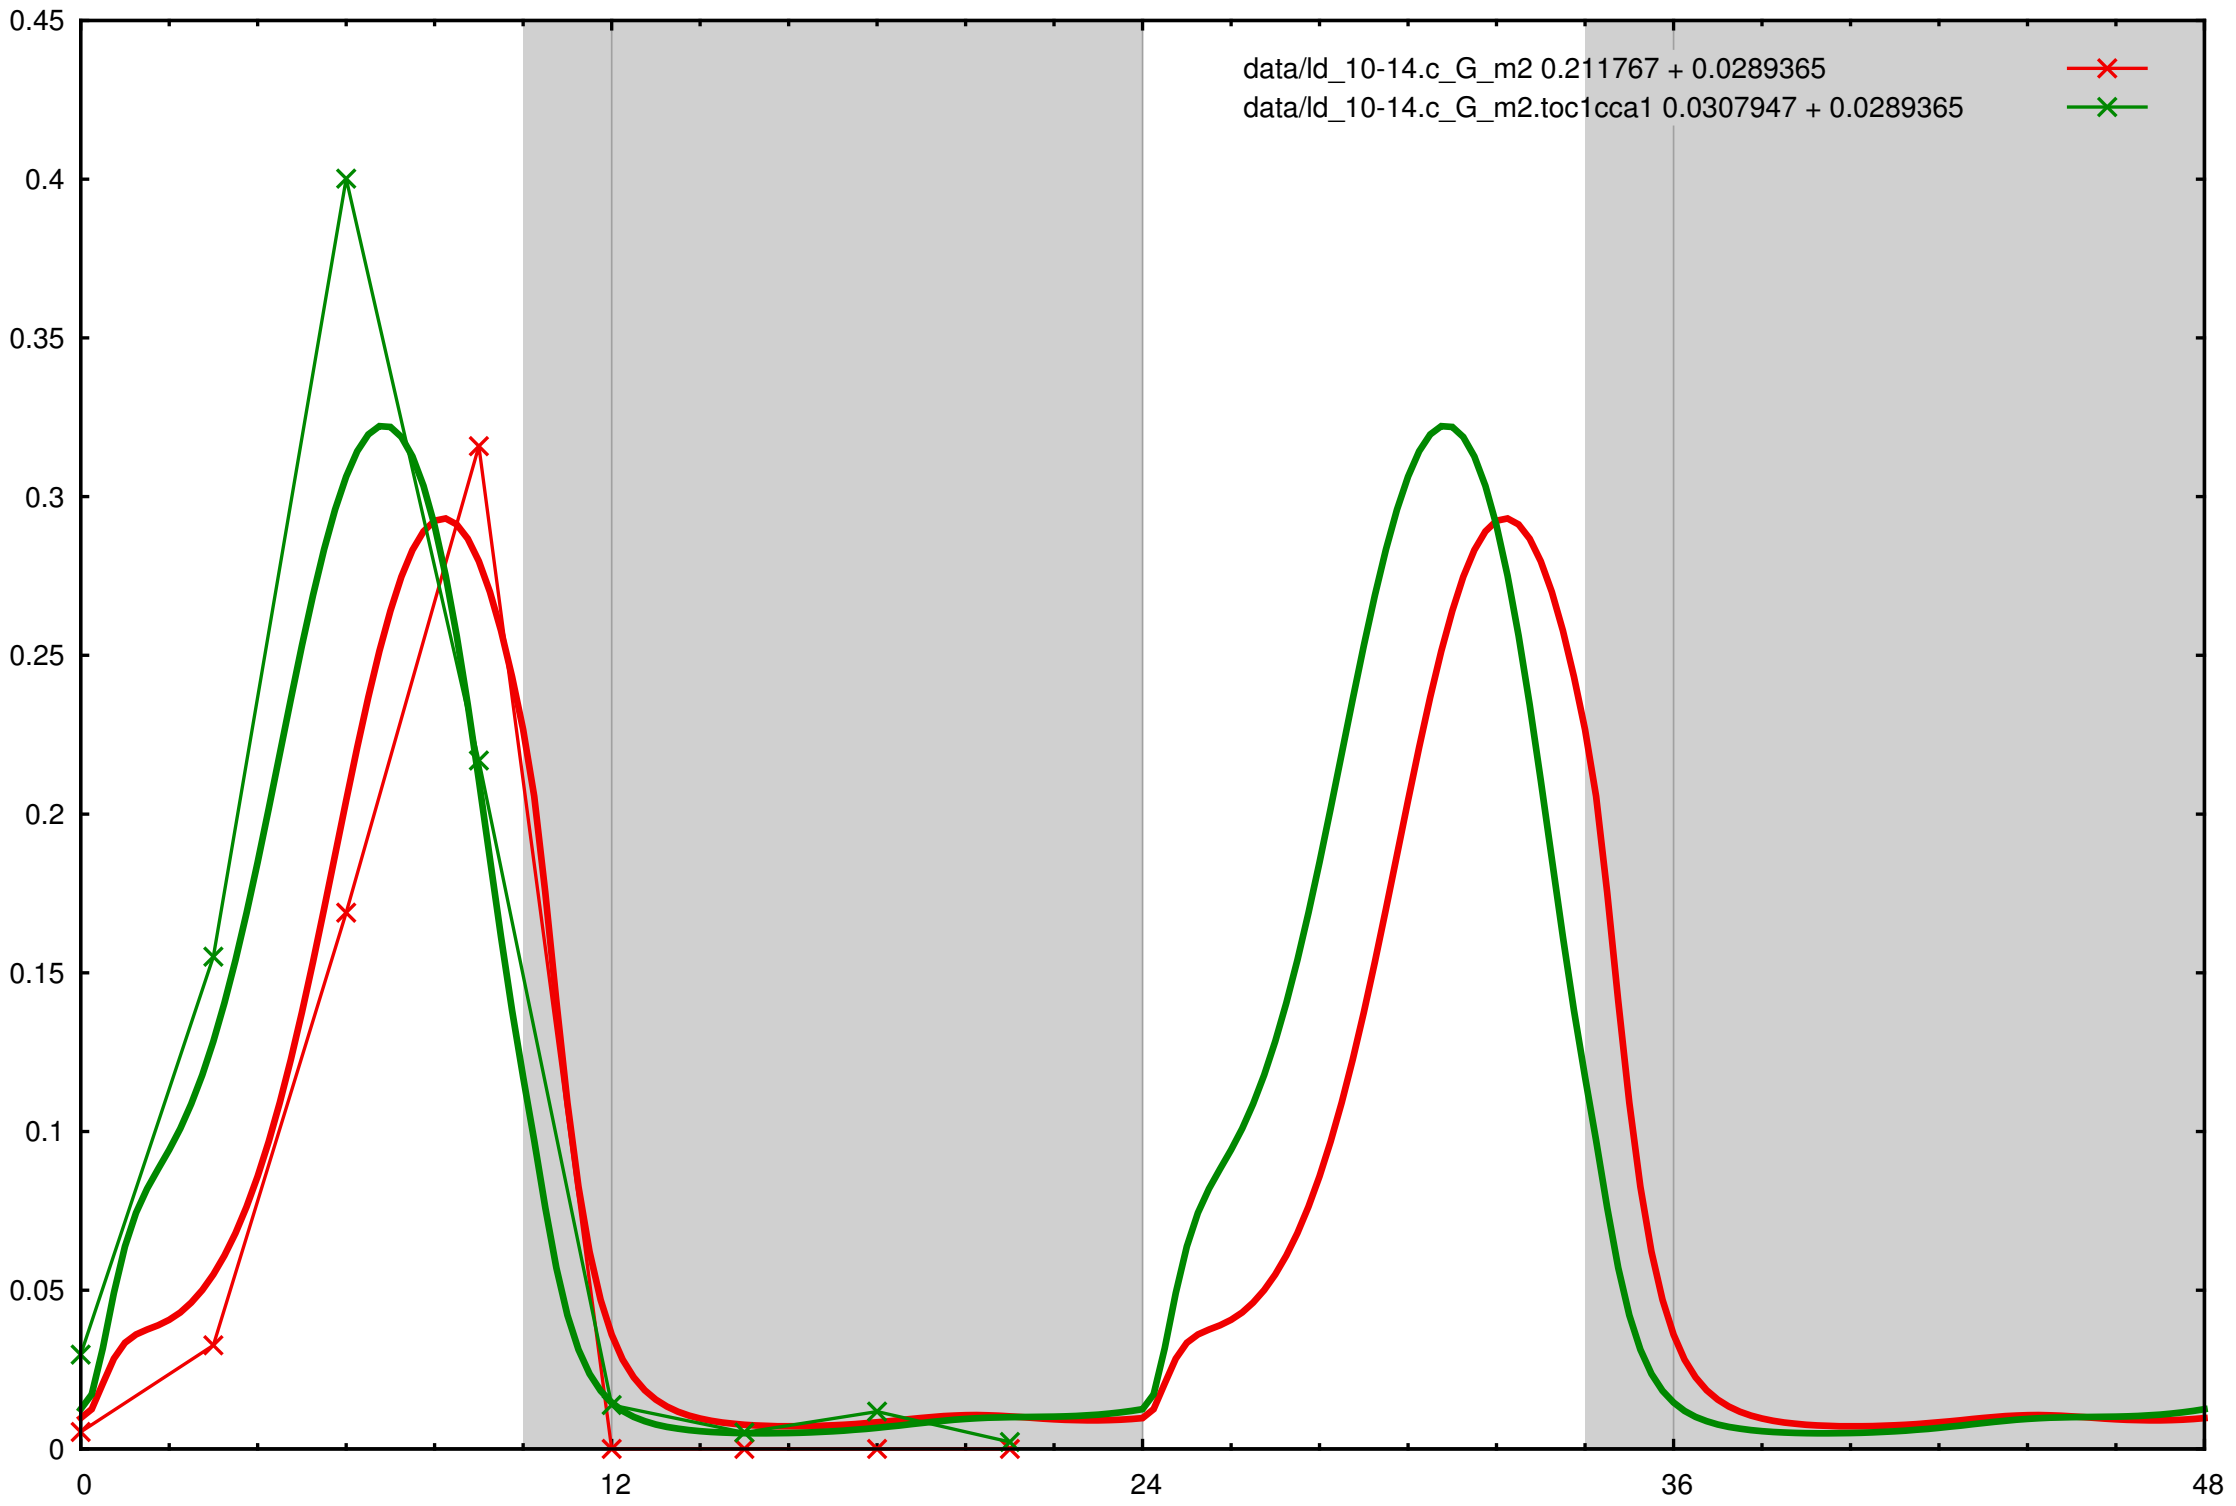

Scale group 106, scost 0.0147761

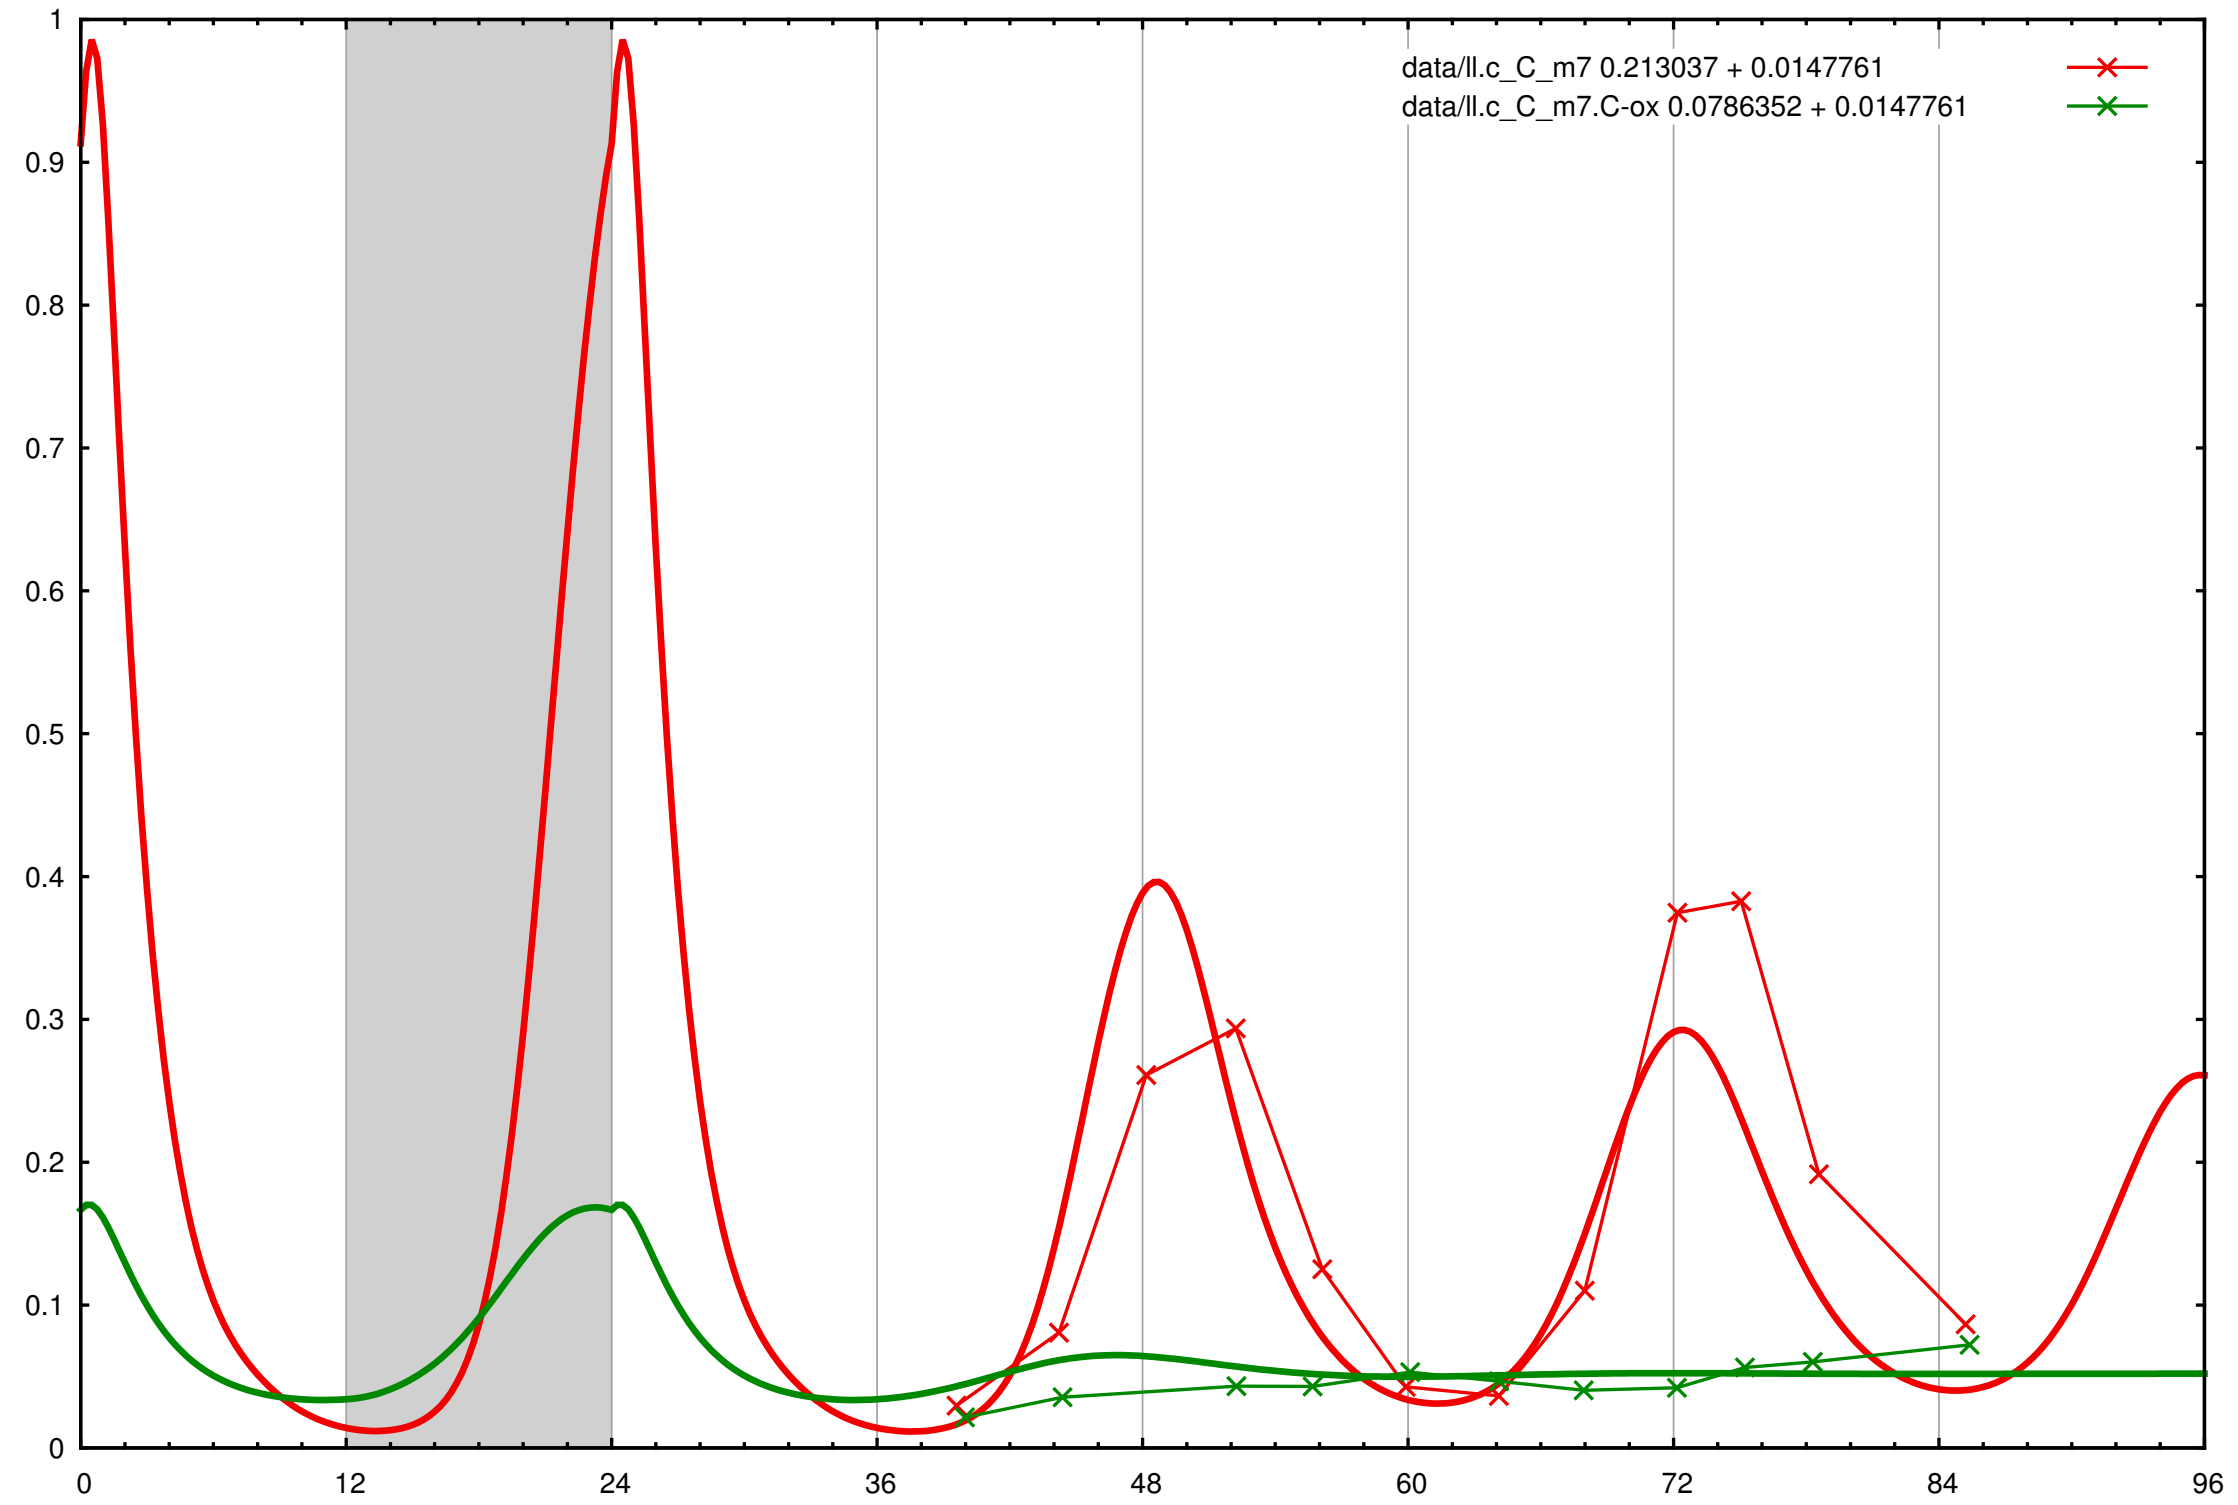

Scale group 107, scost 0.199029

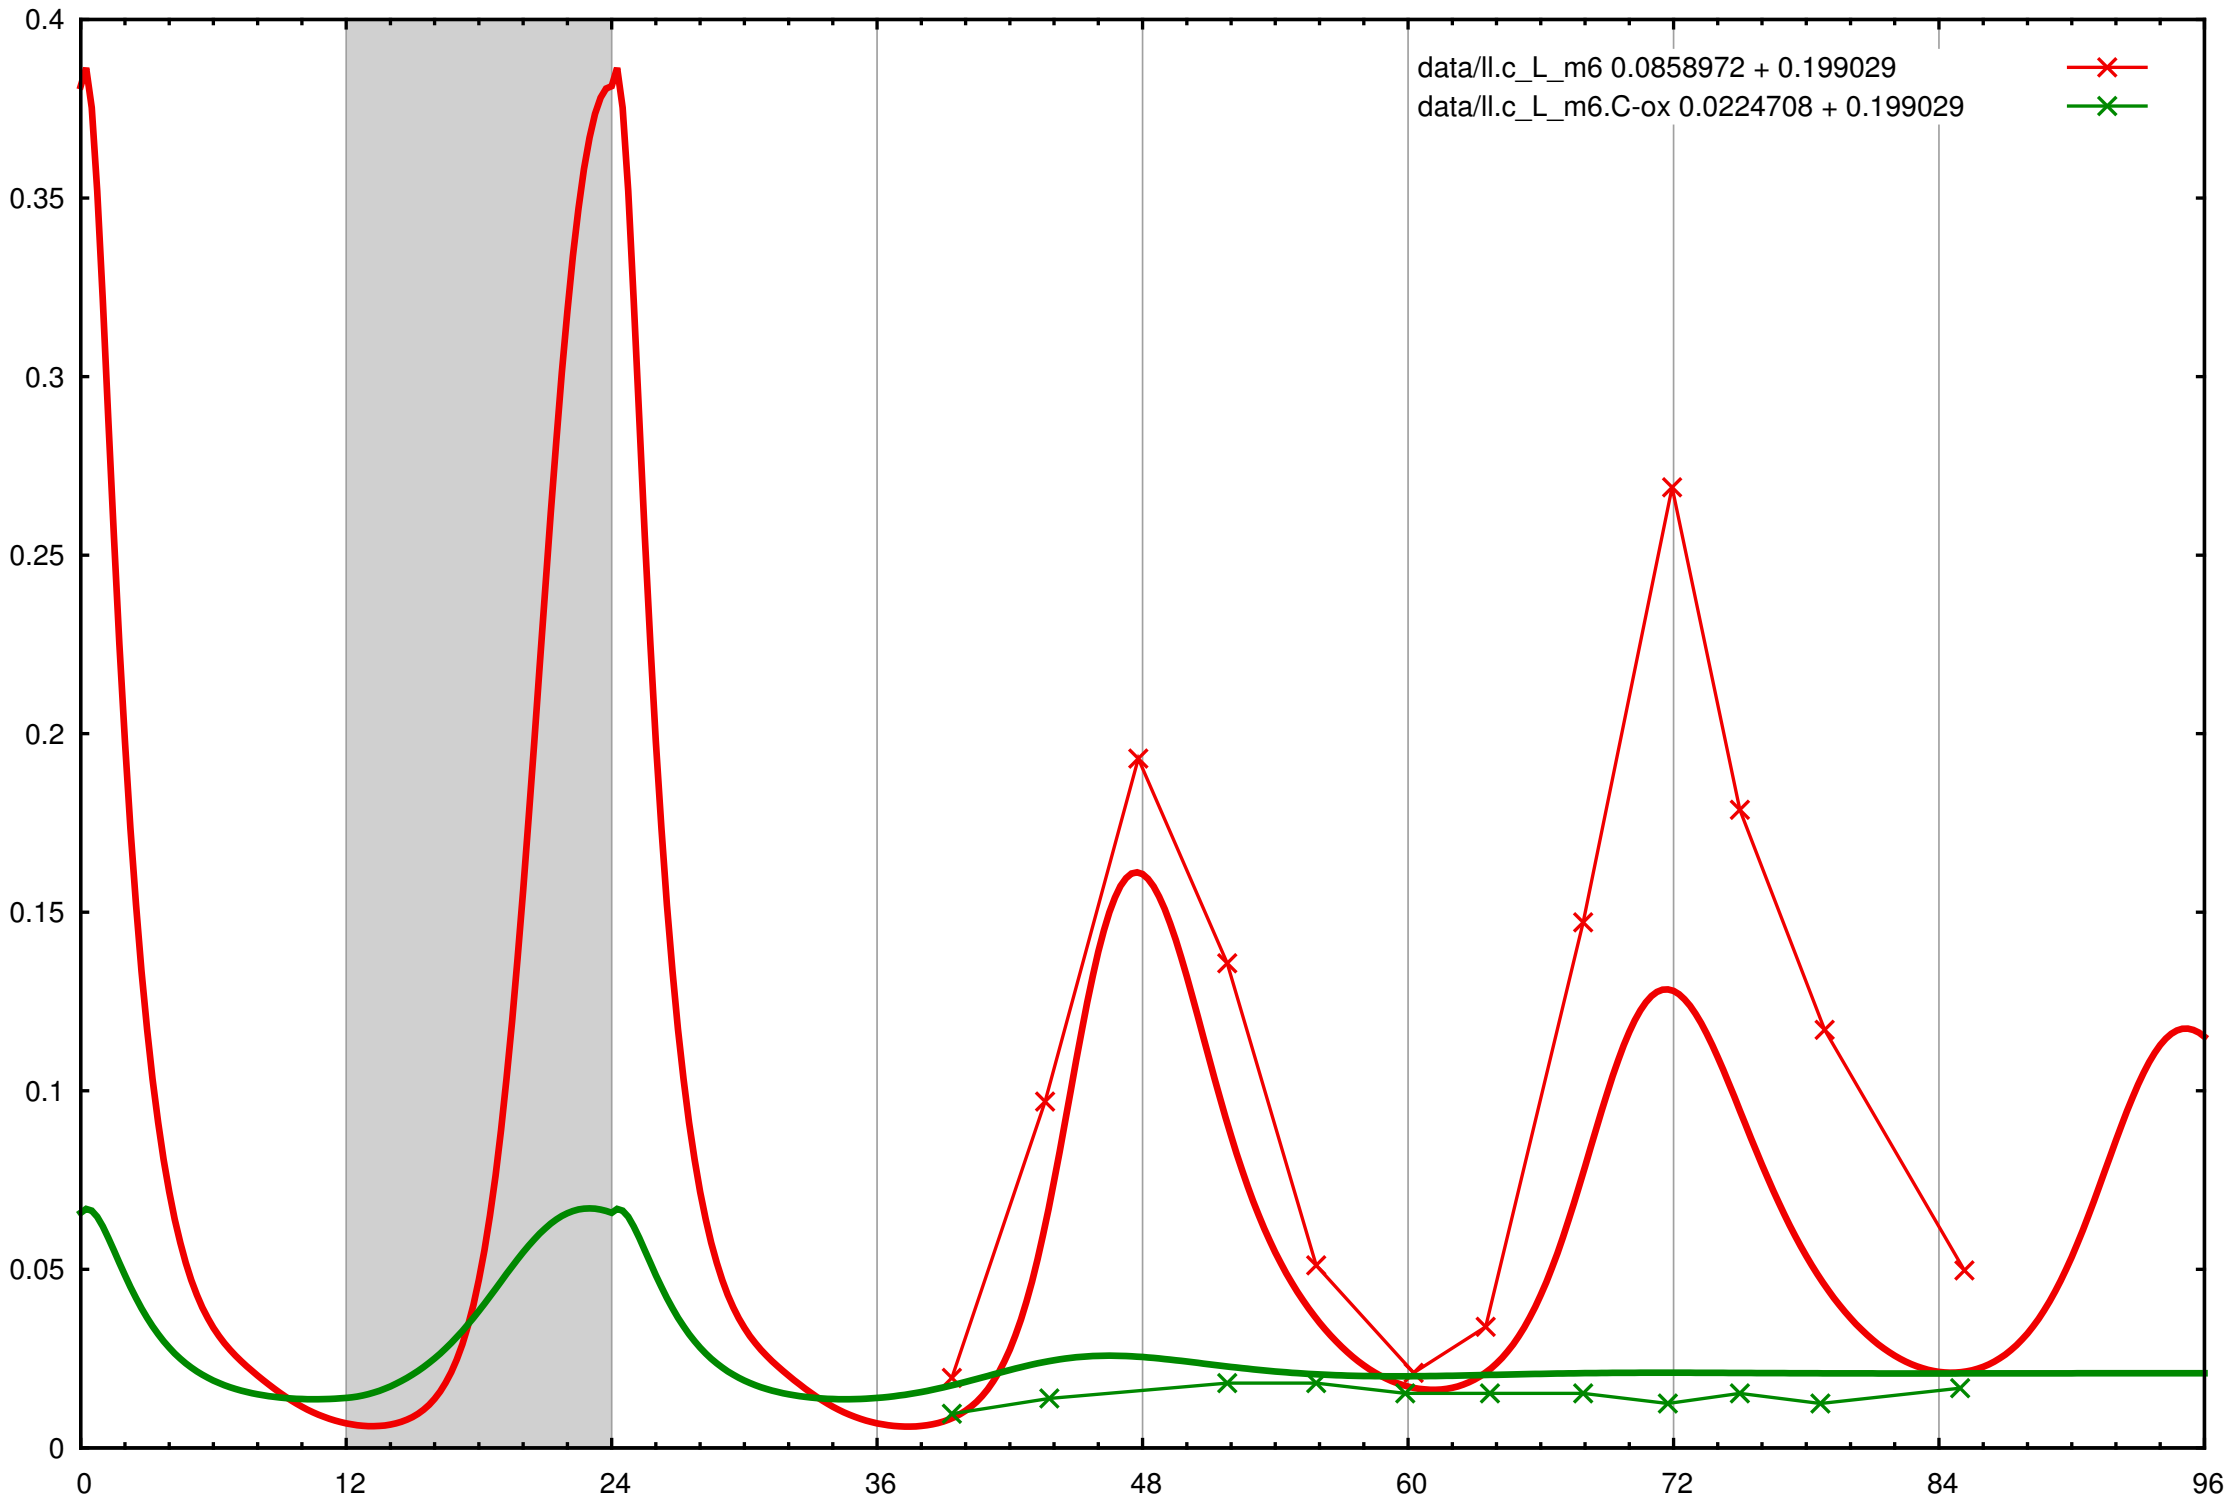

Scale group 108, scost 0.136968

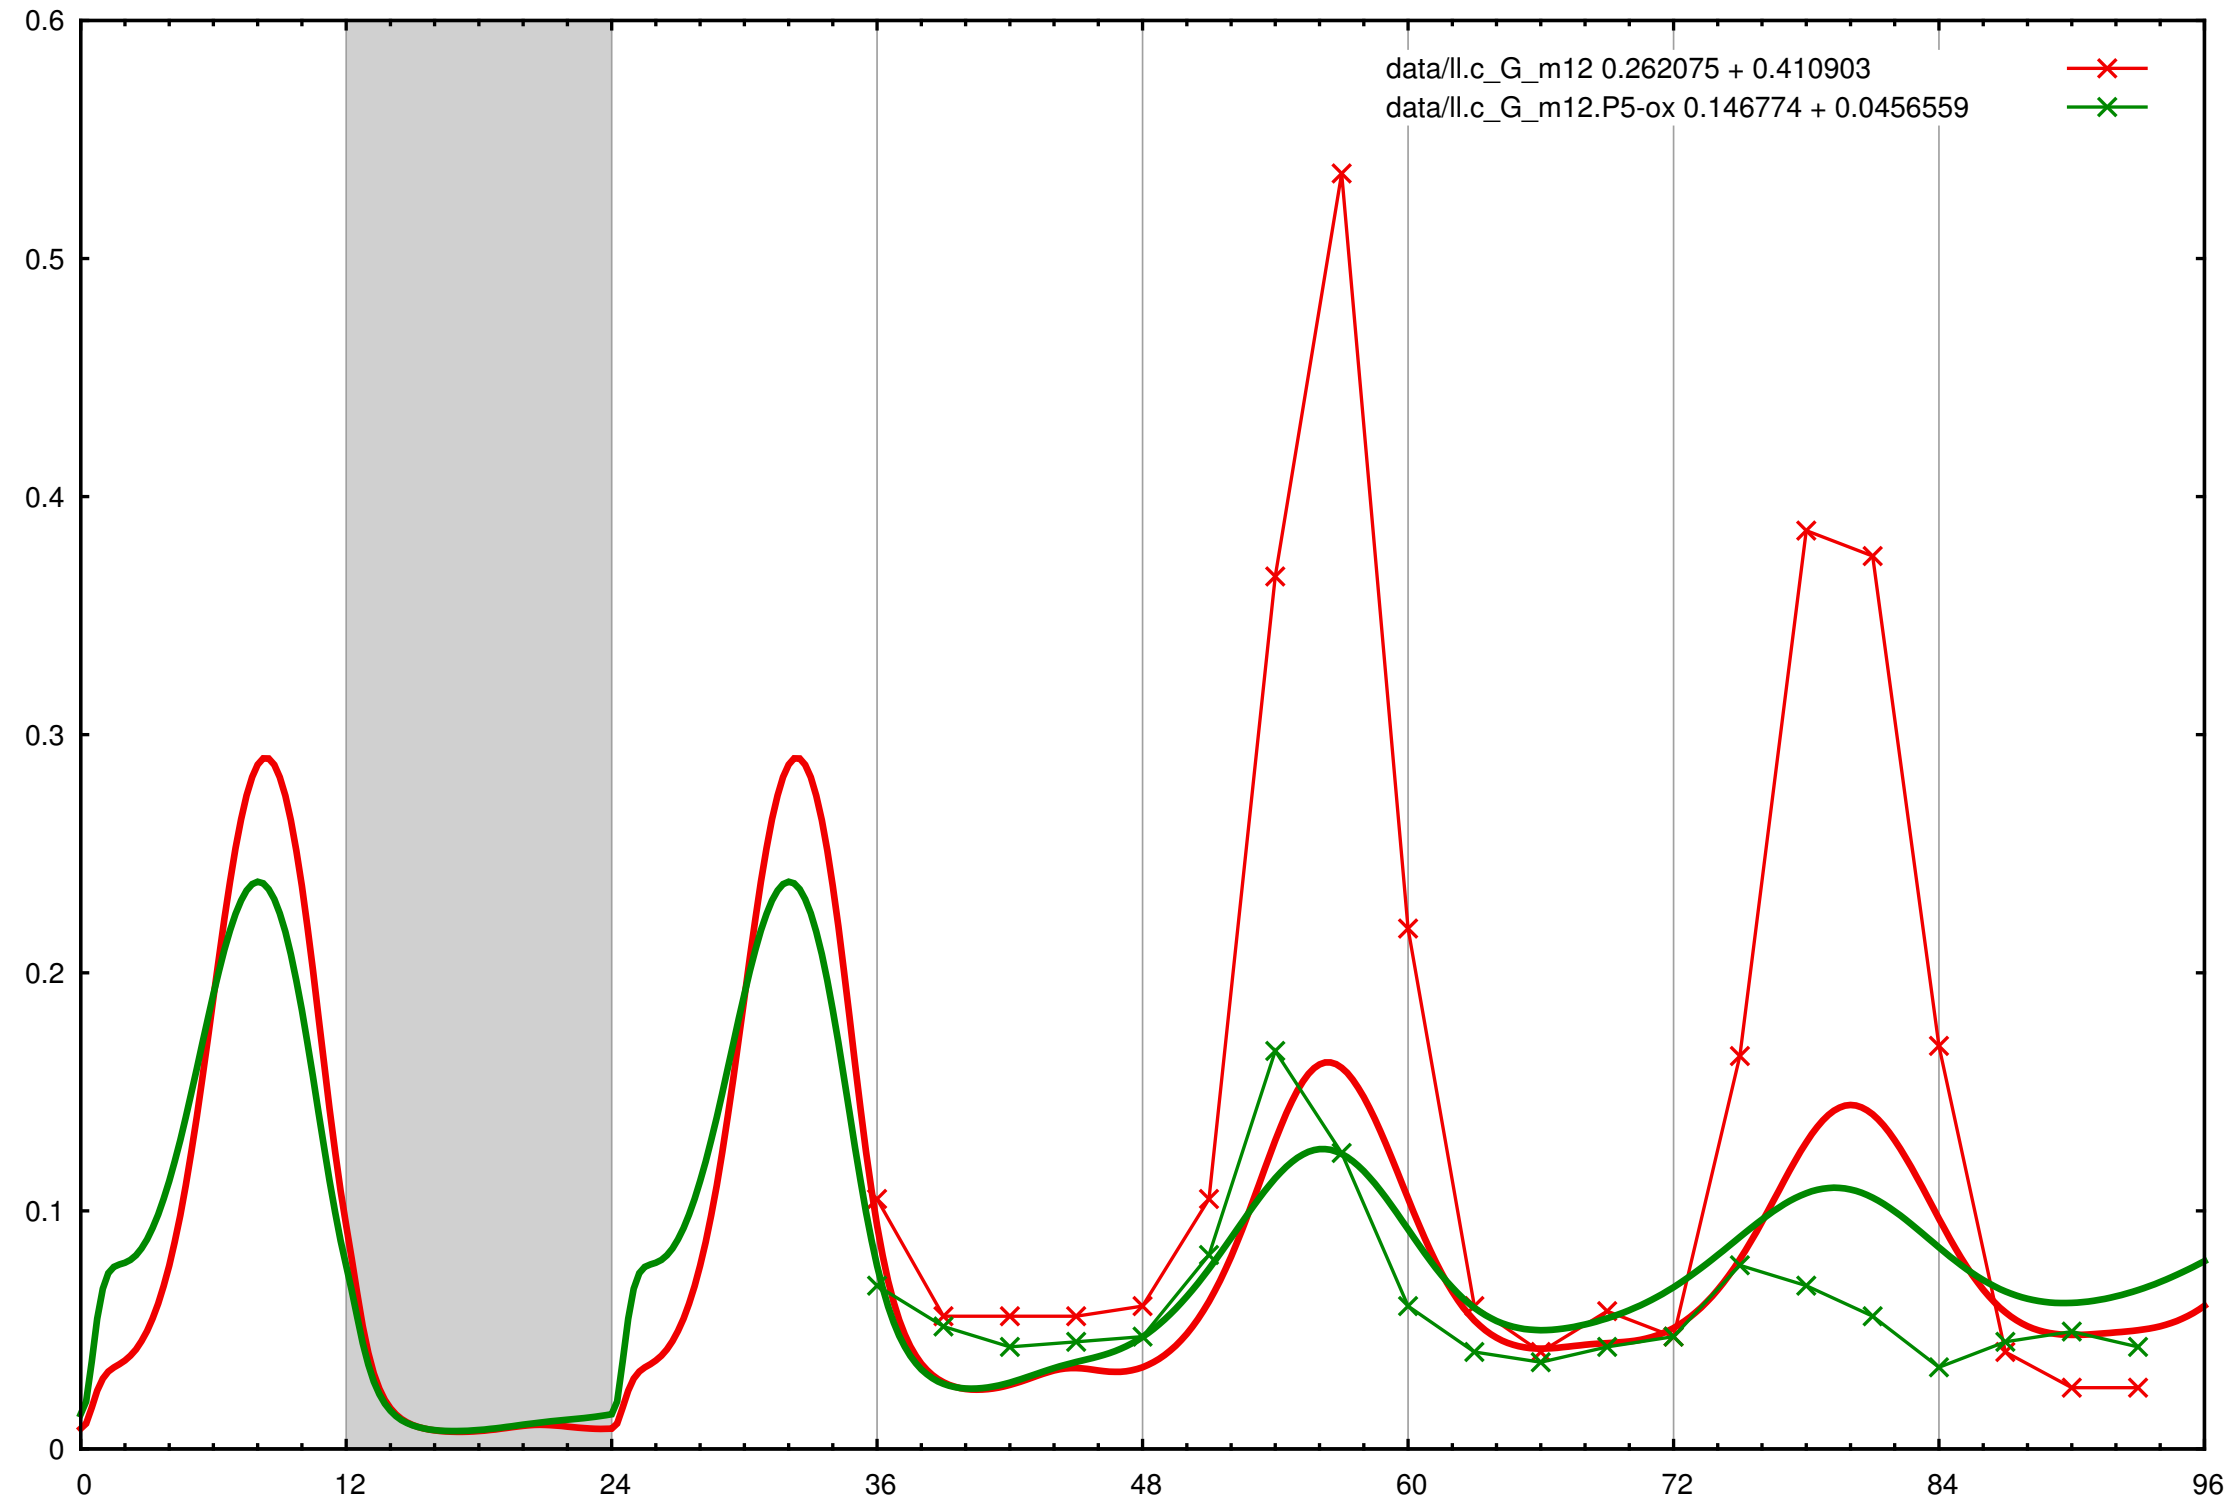

Scale group 109, scost 0.125747

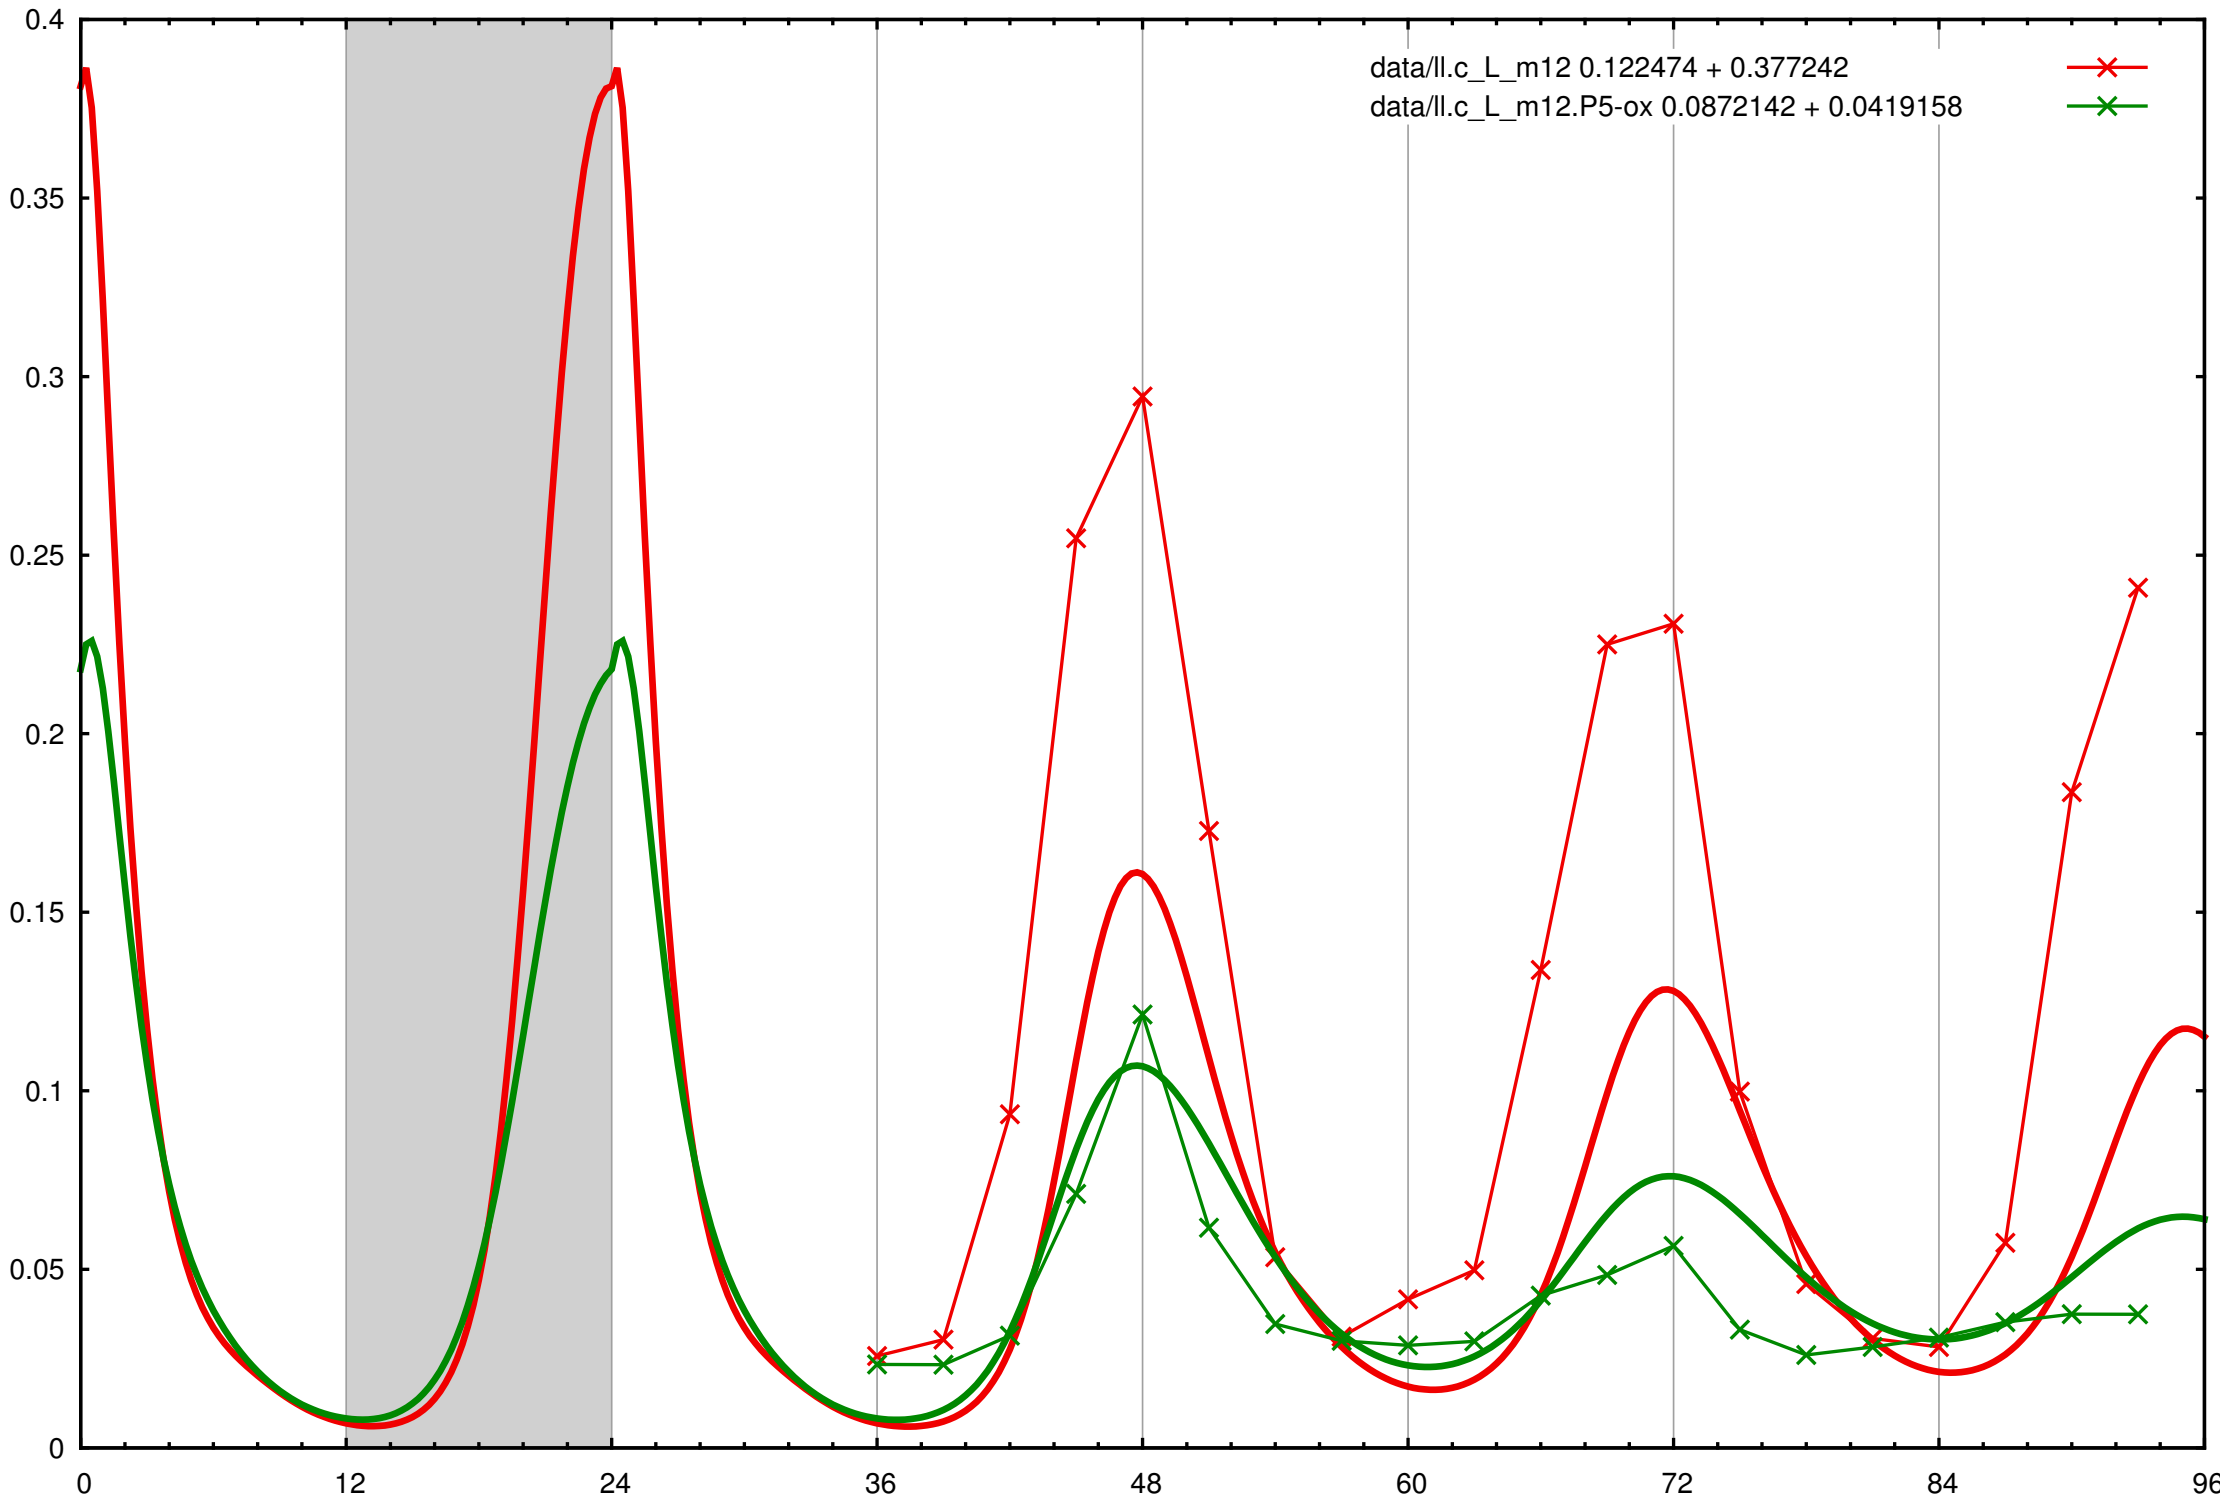

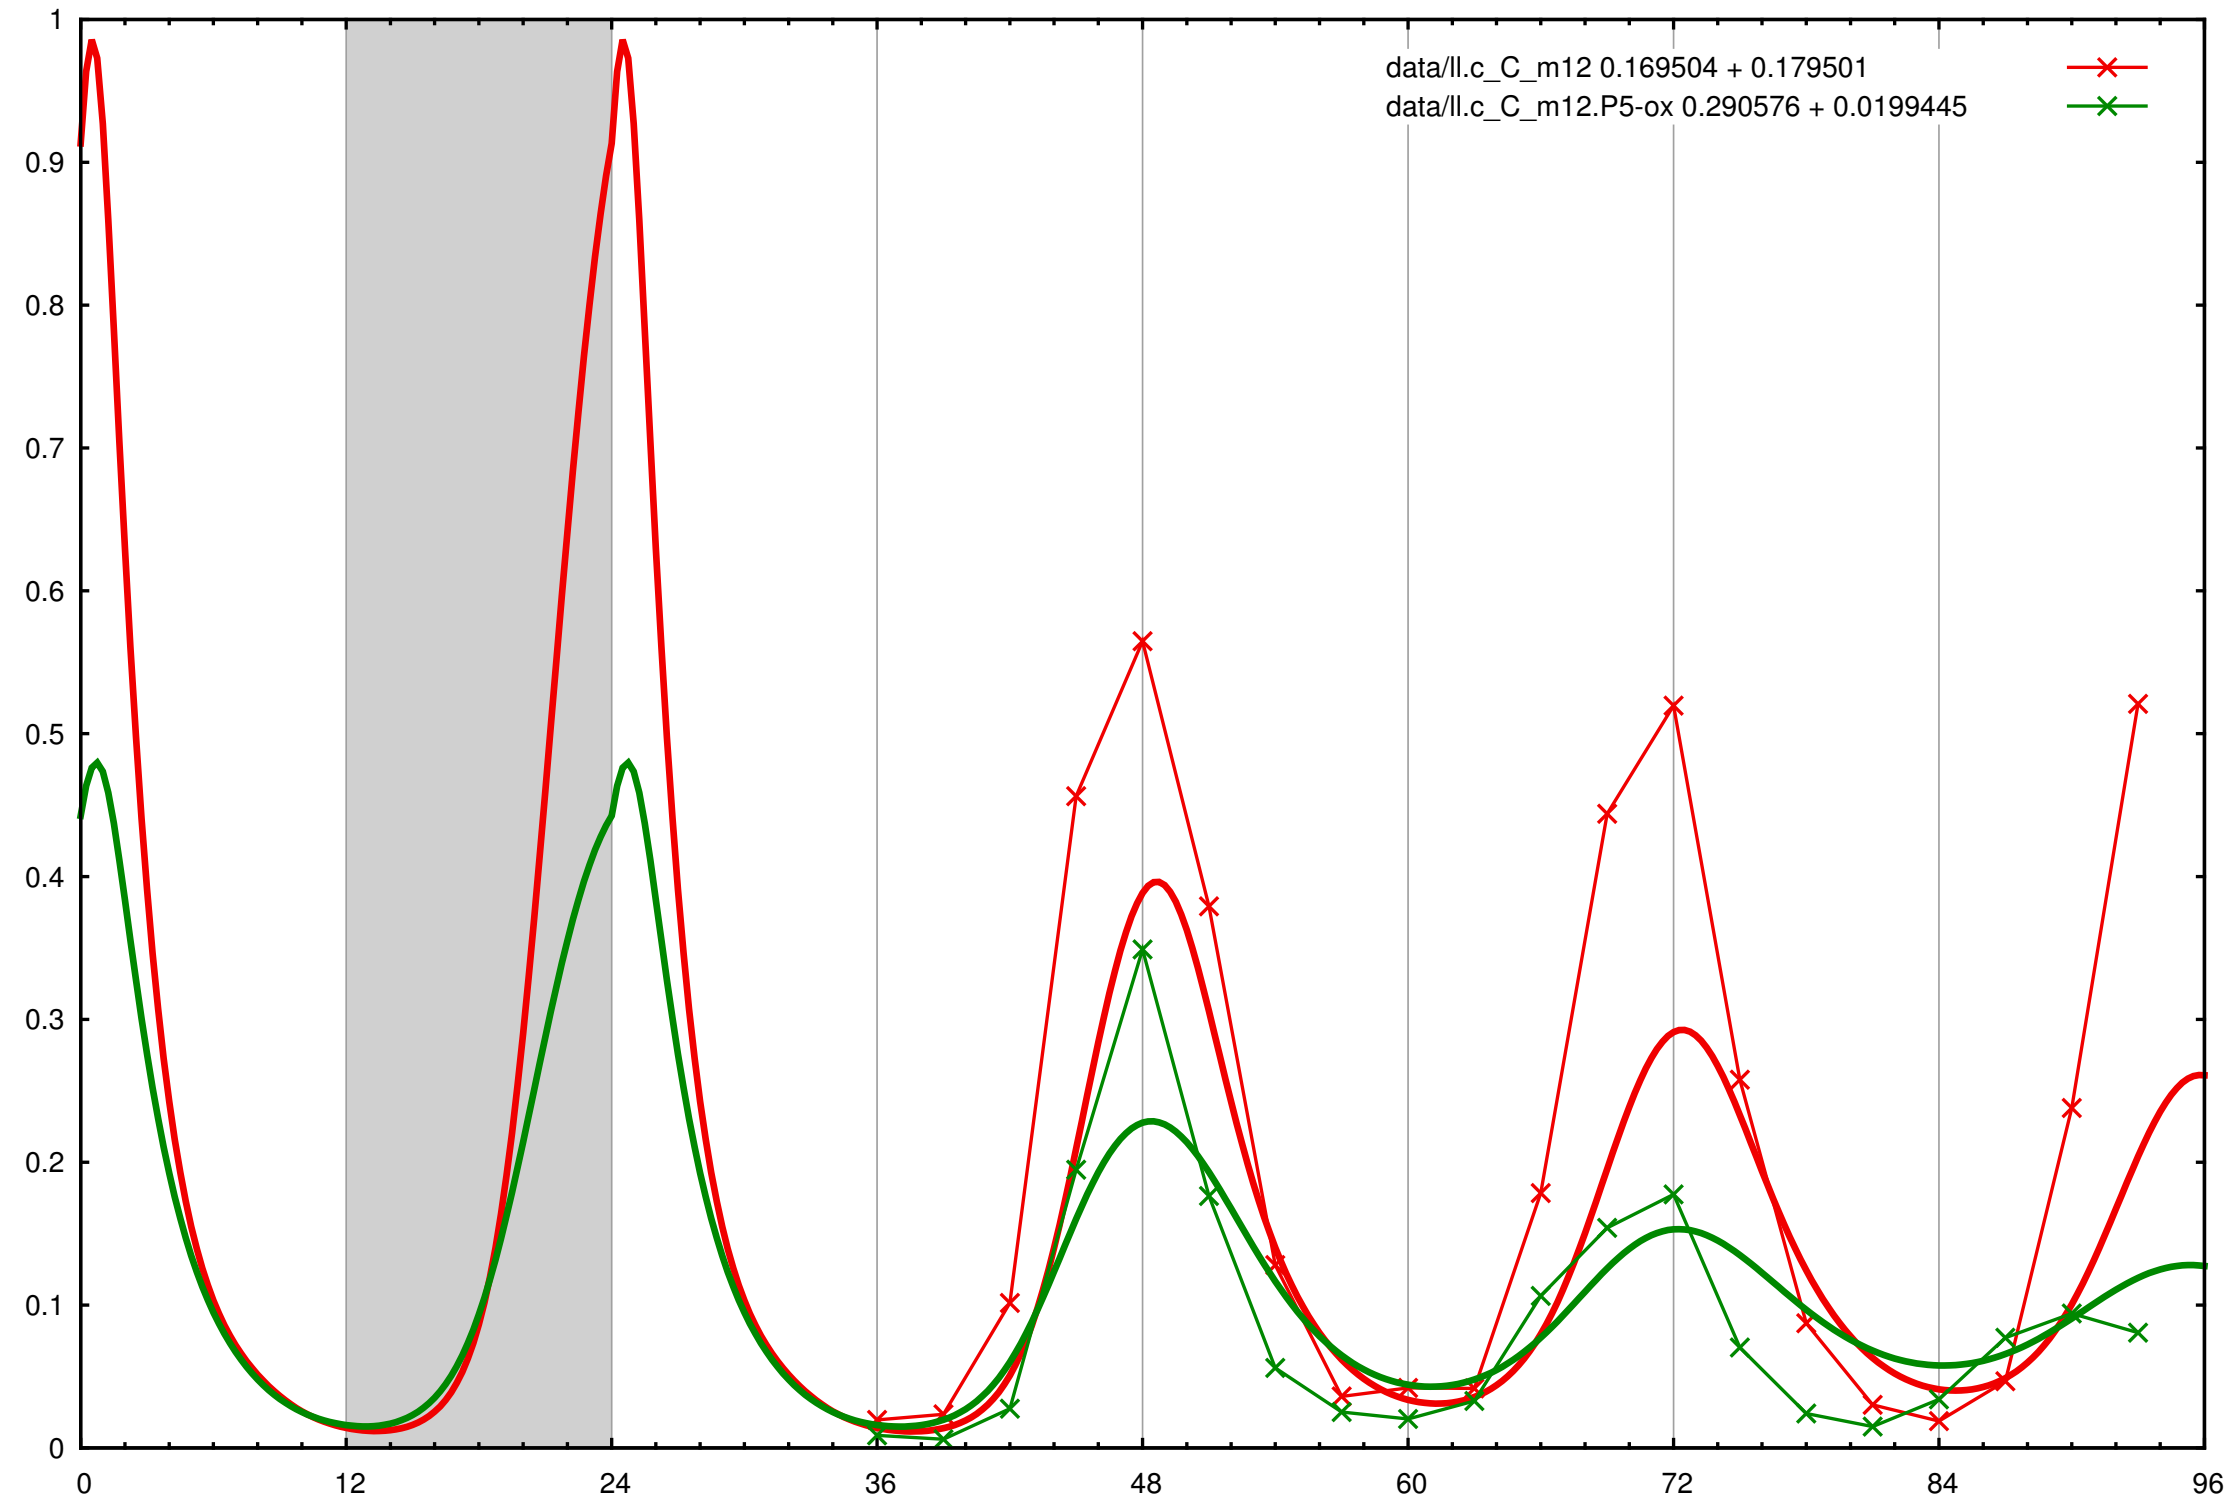

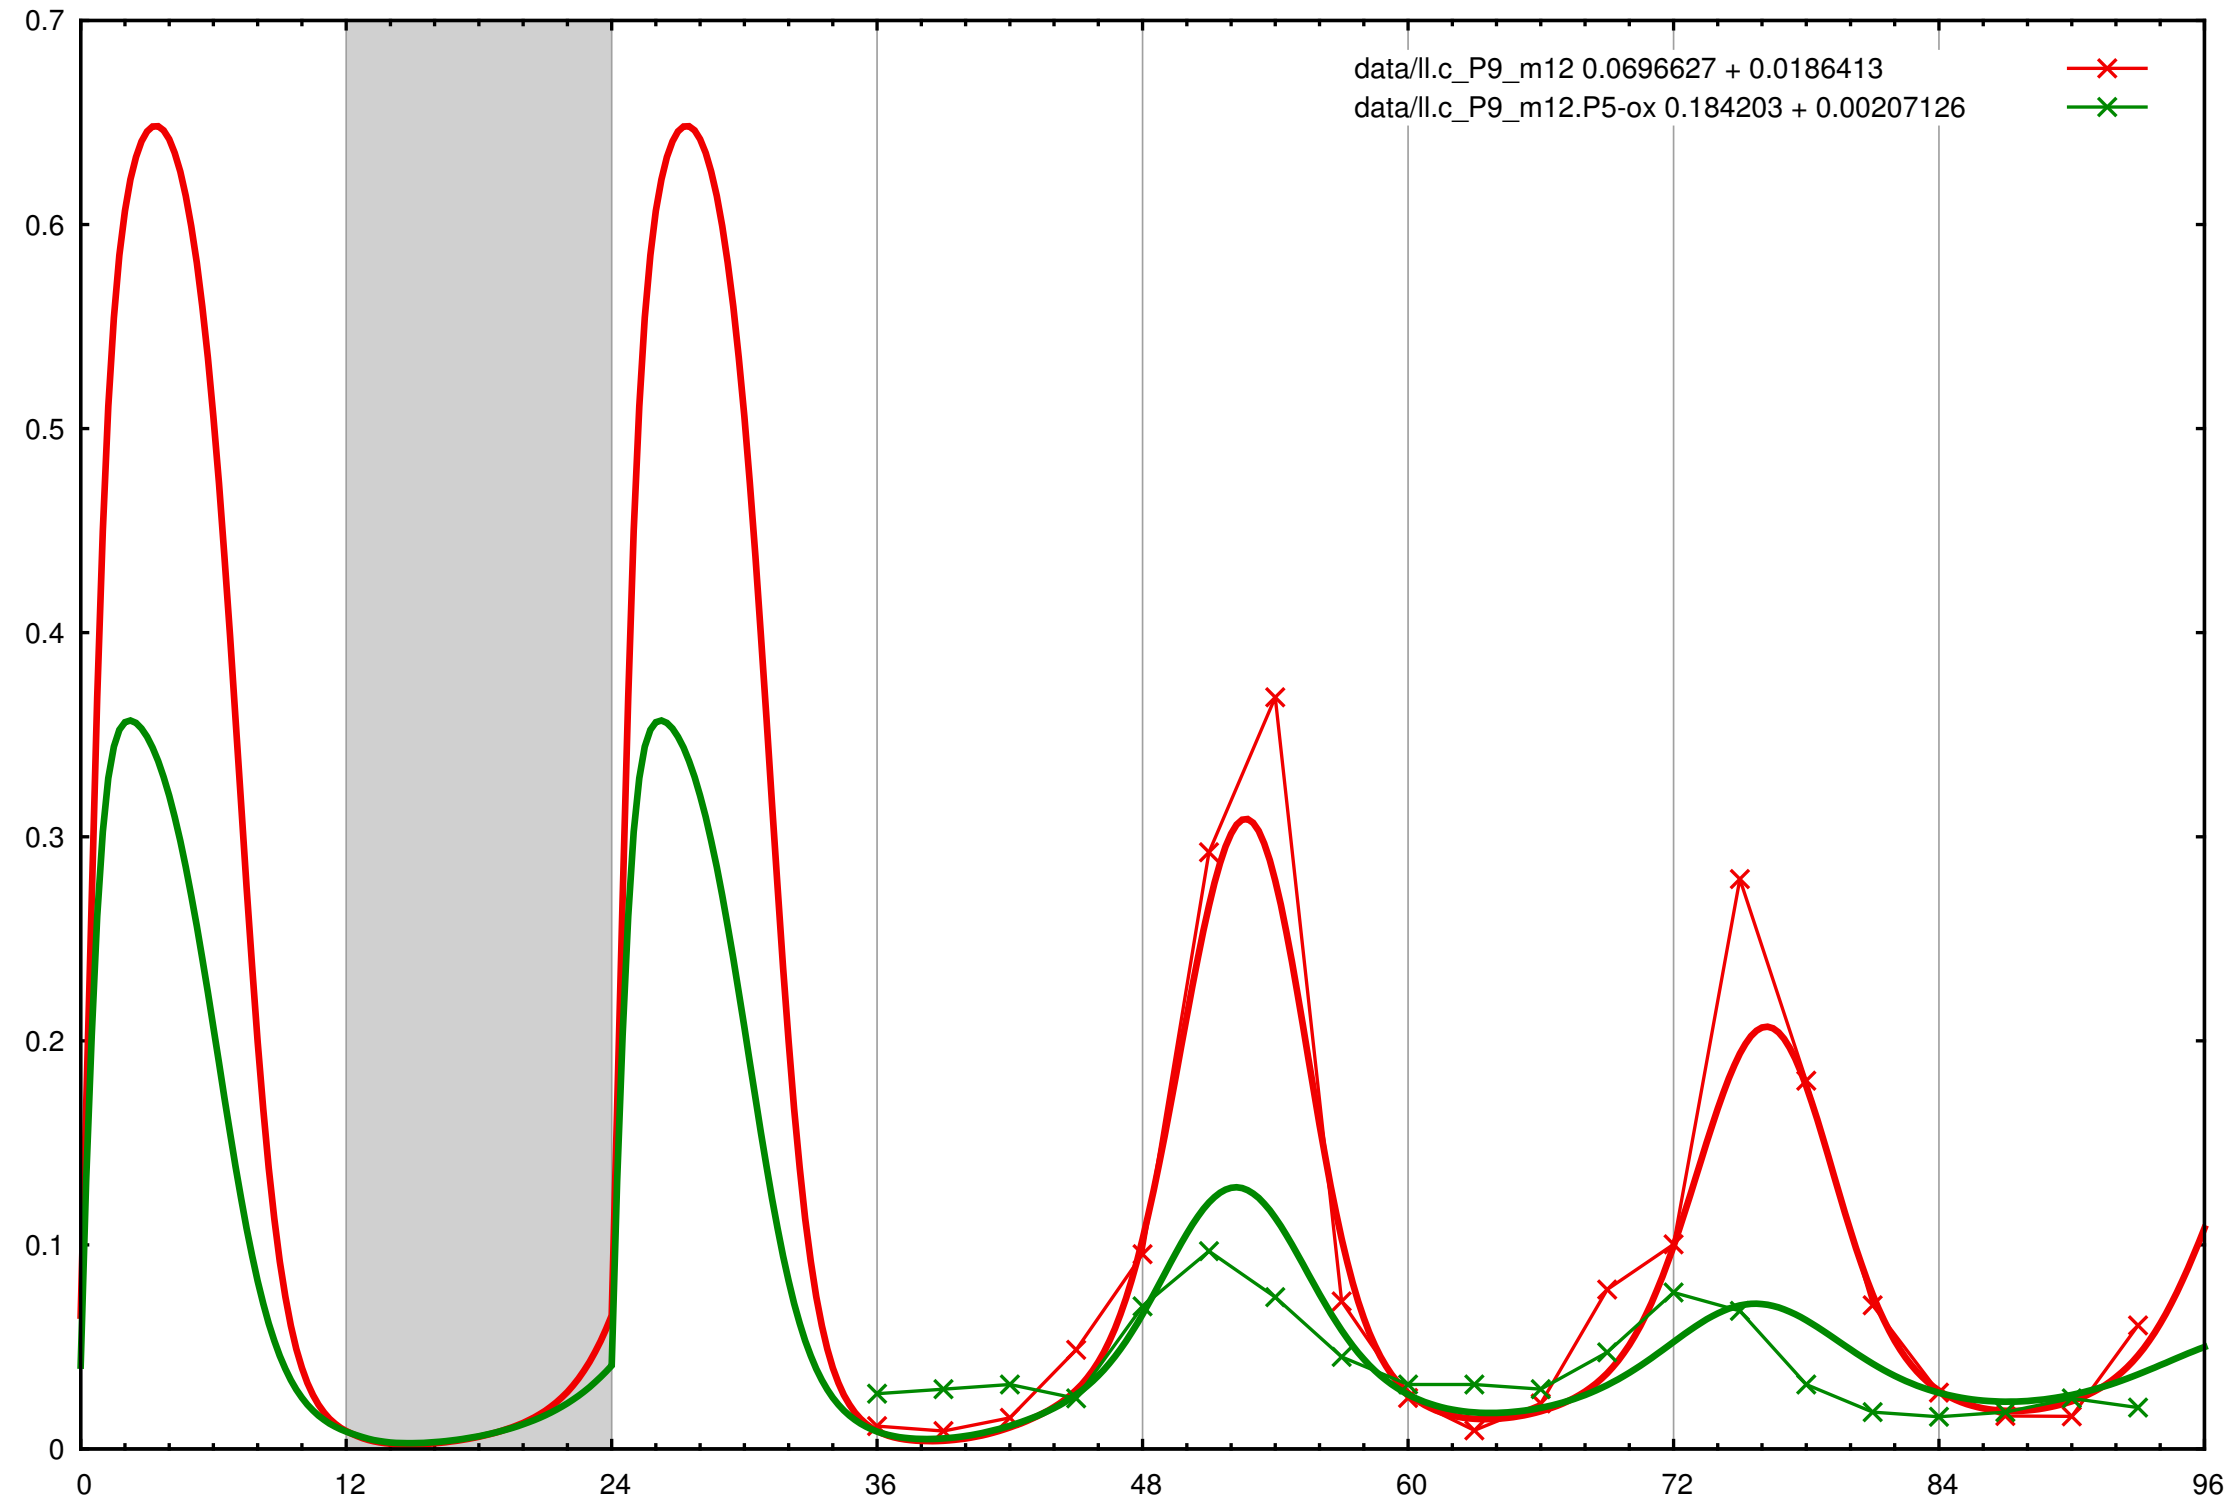

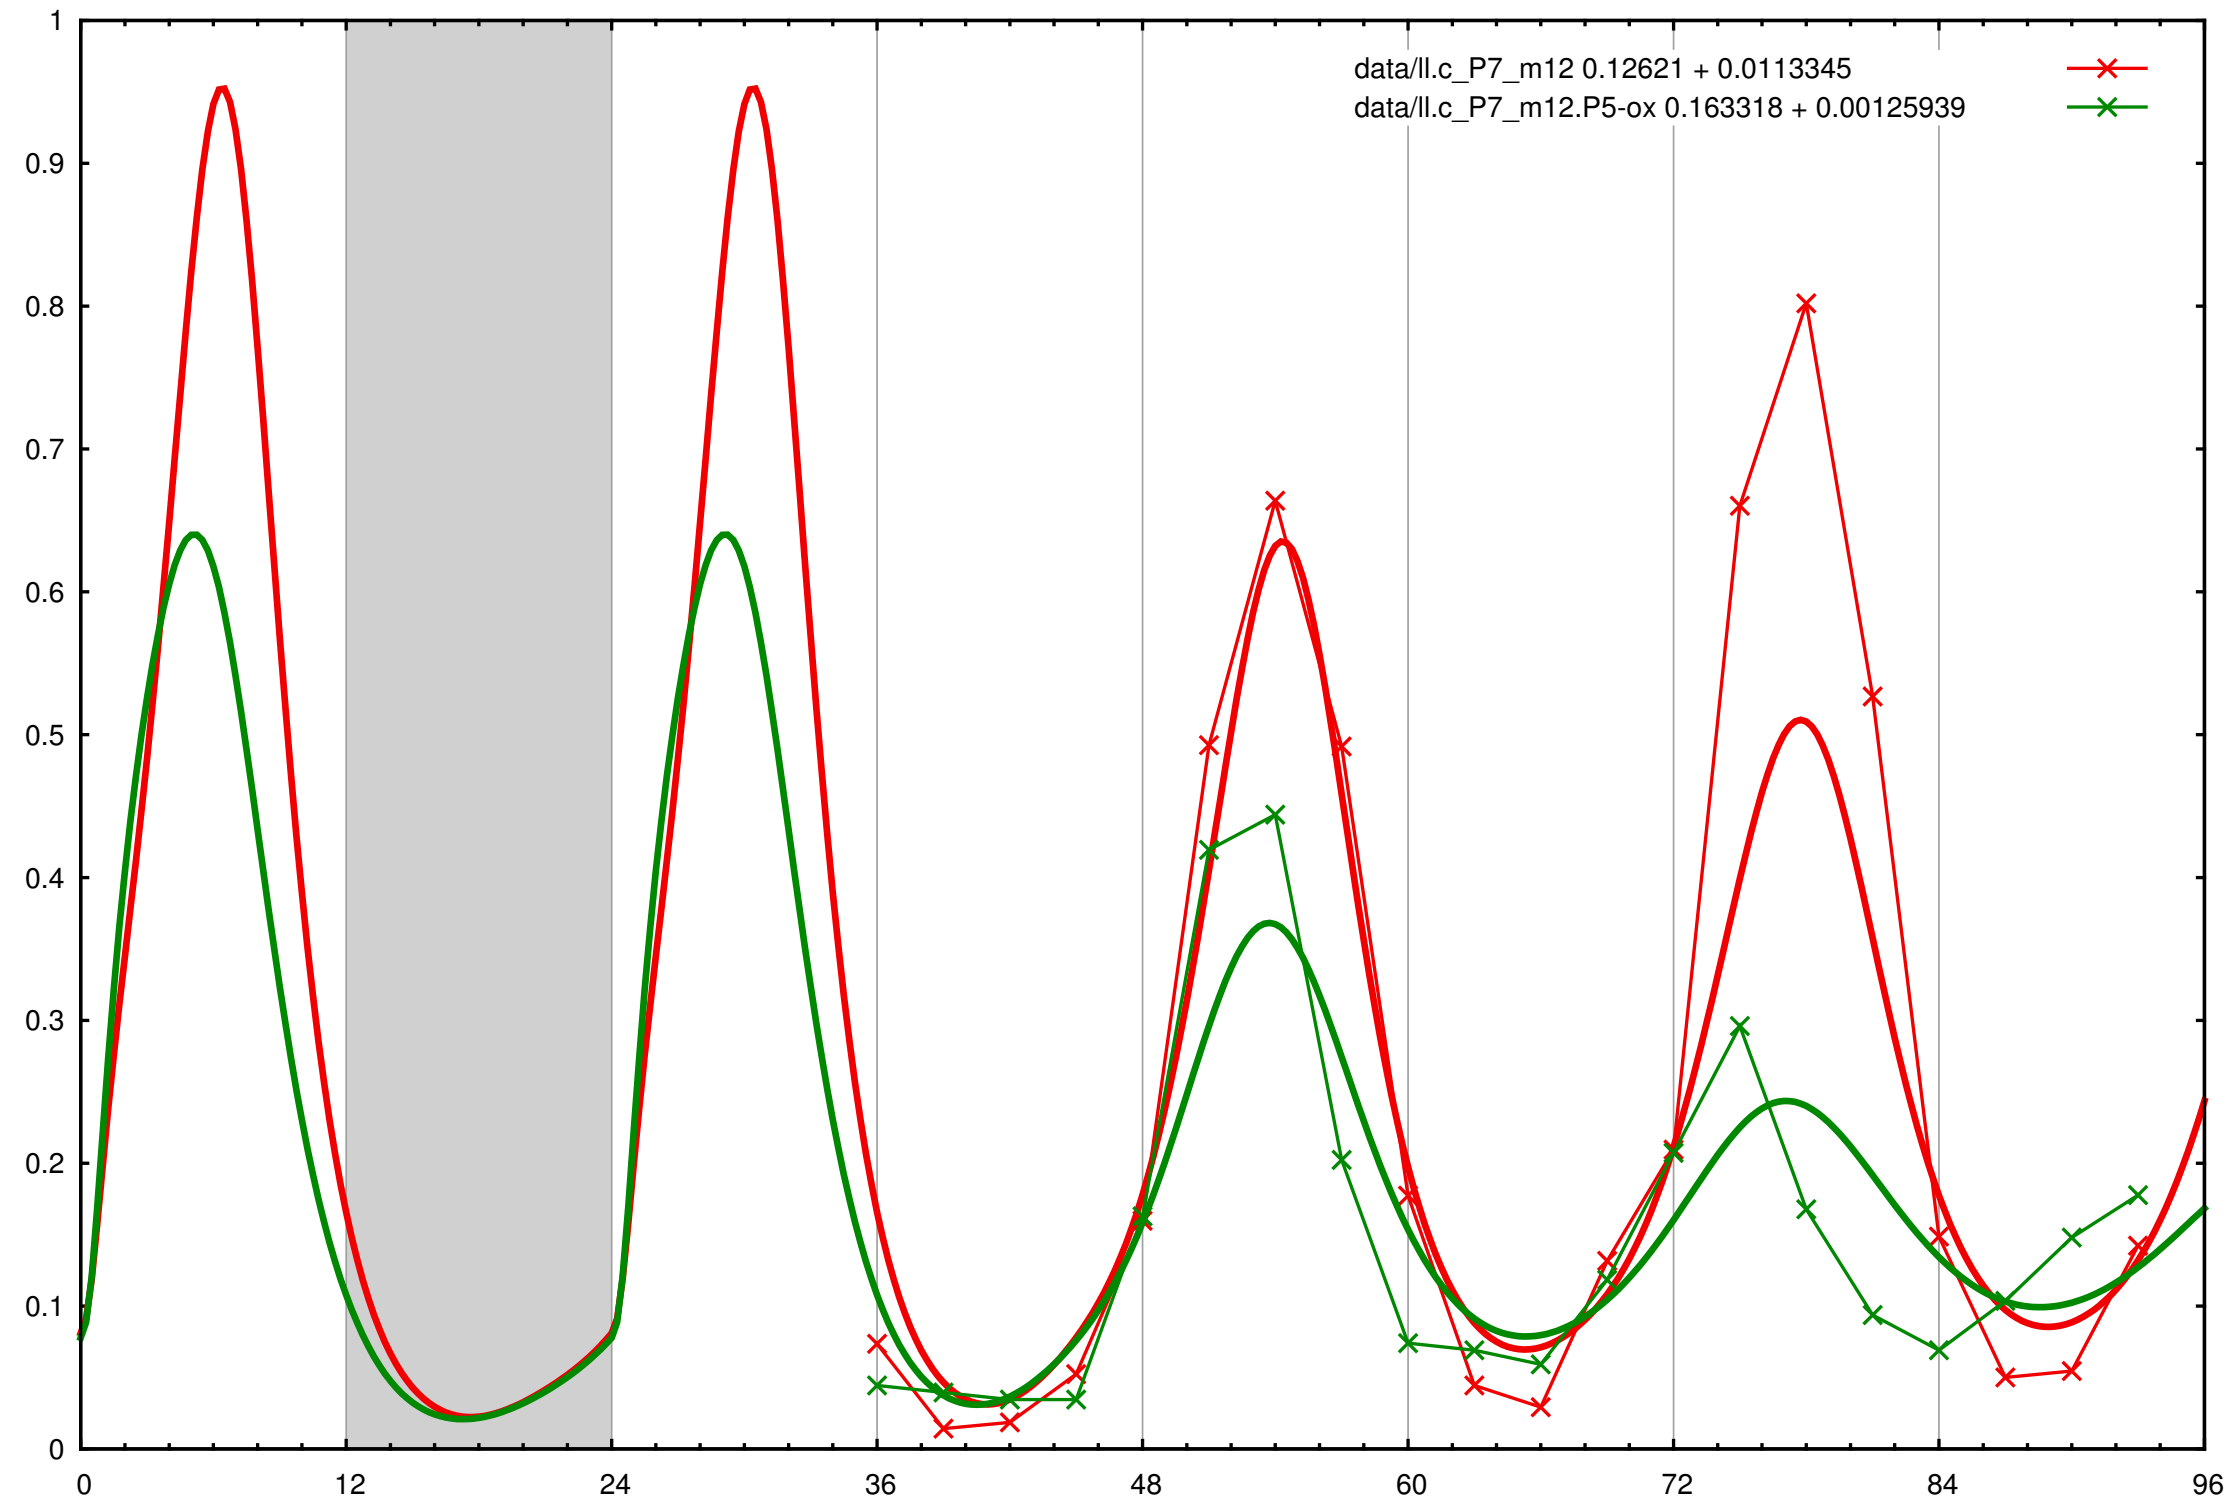



Scale group 113, scost 1.14202

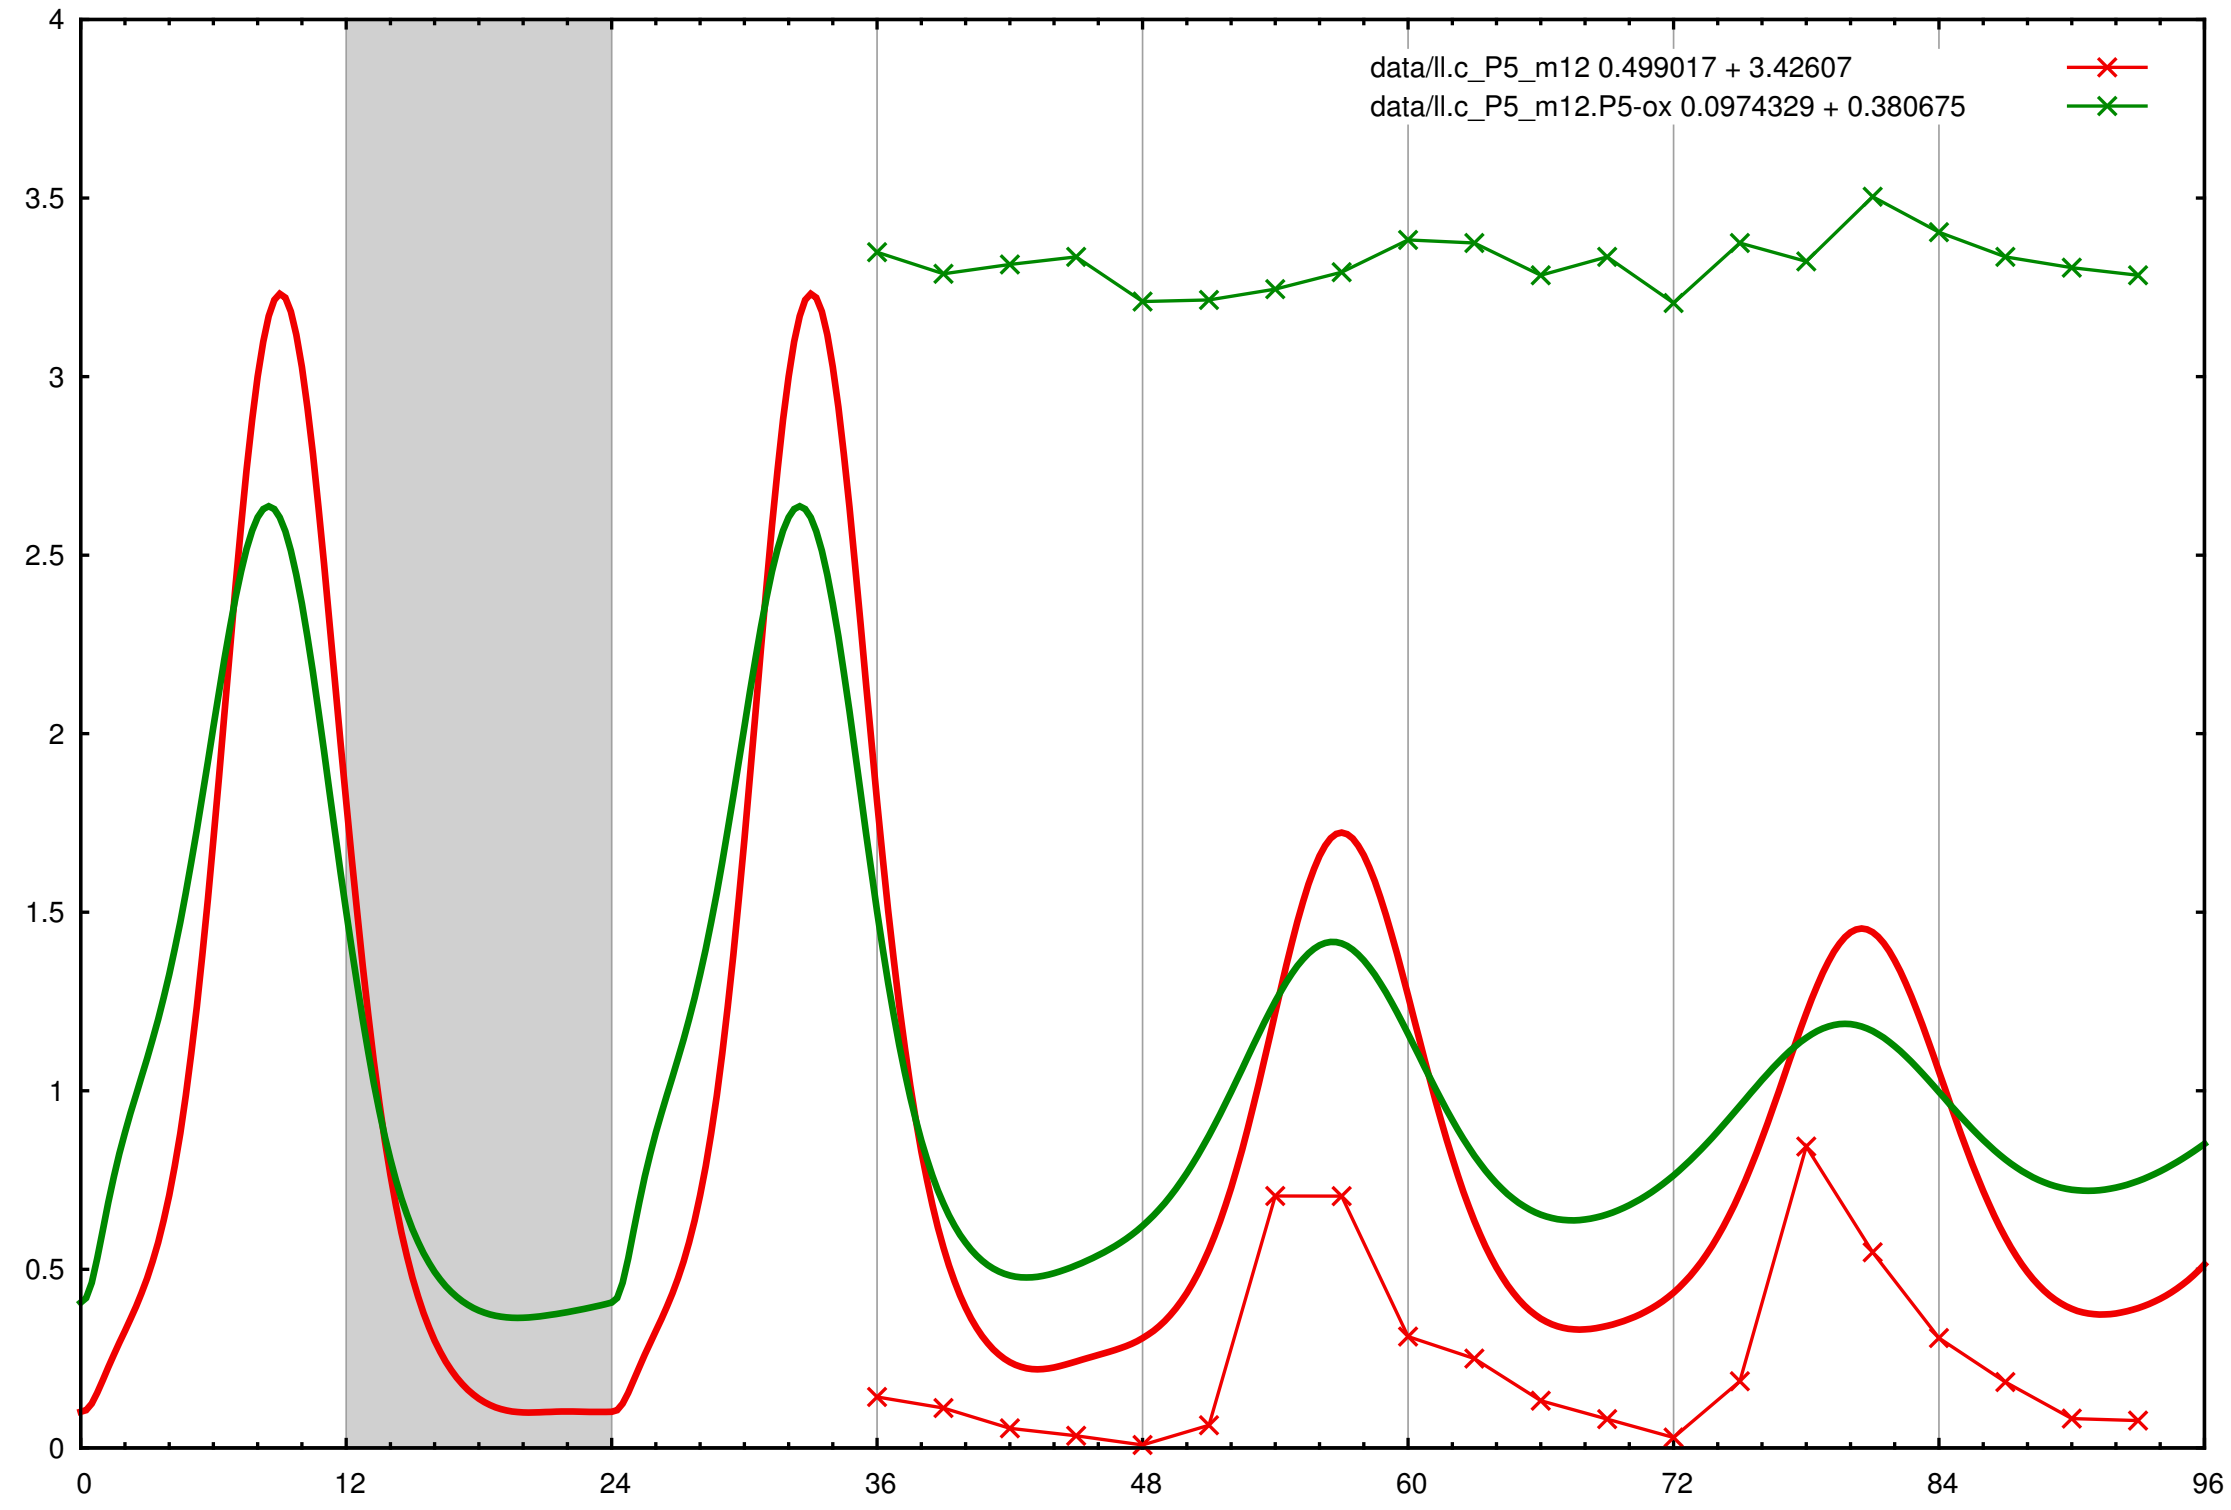

Scale group 114, scost 0.0879291

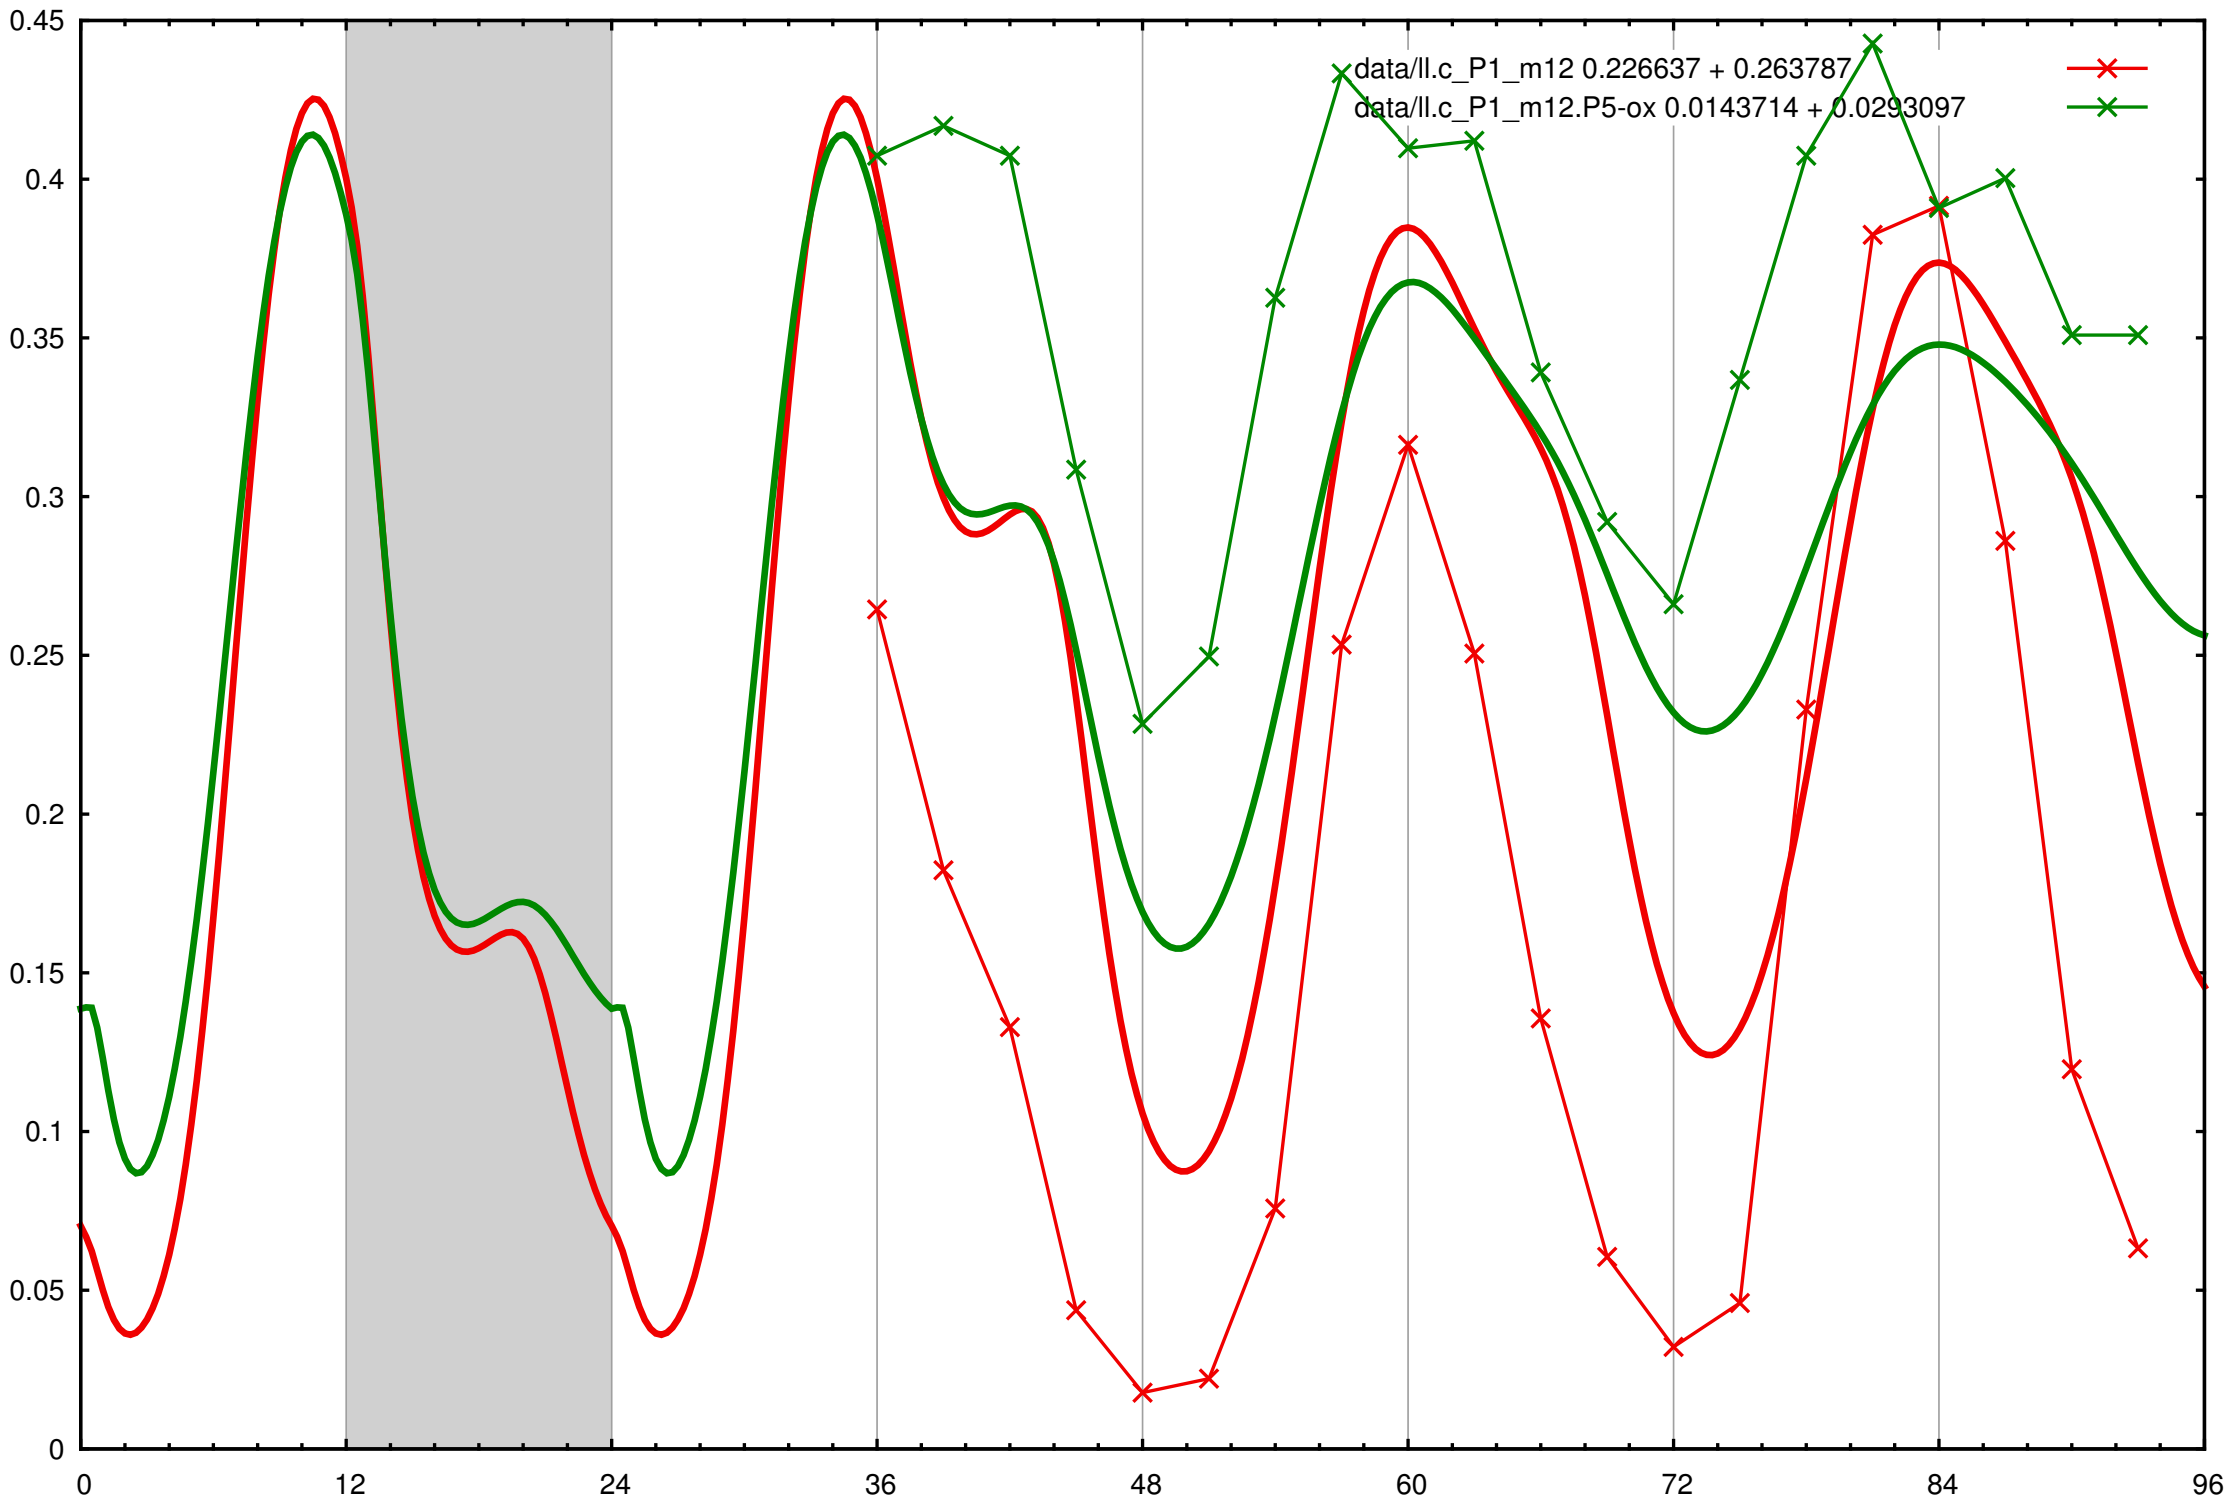

Scale group 115, scost 0.00564405

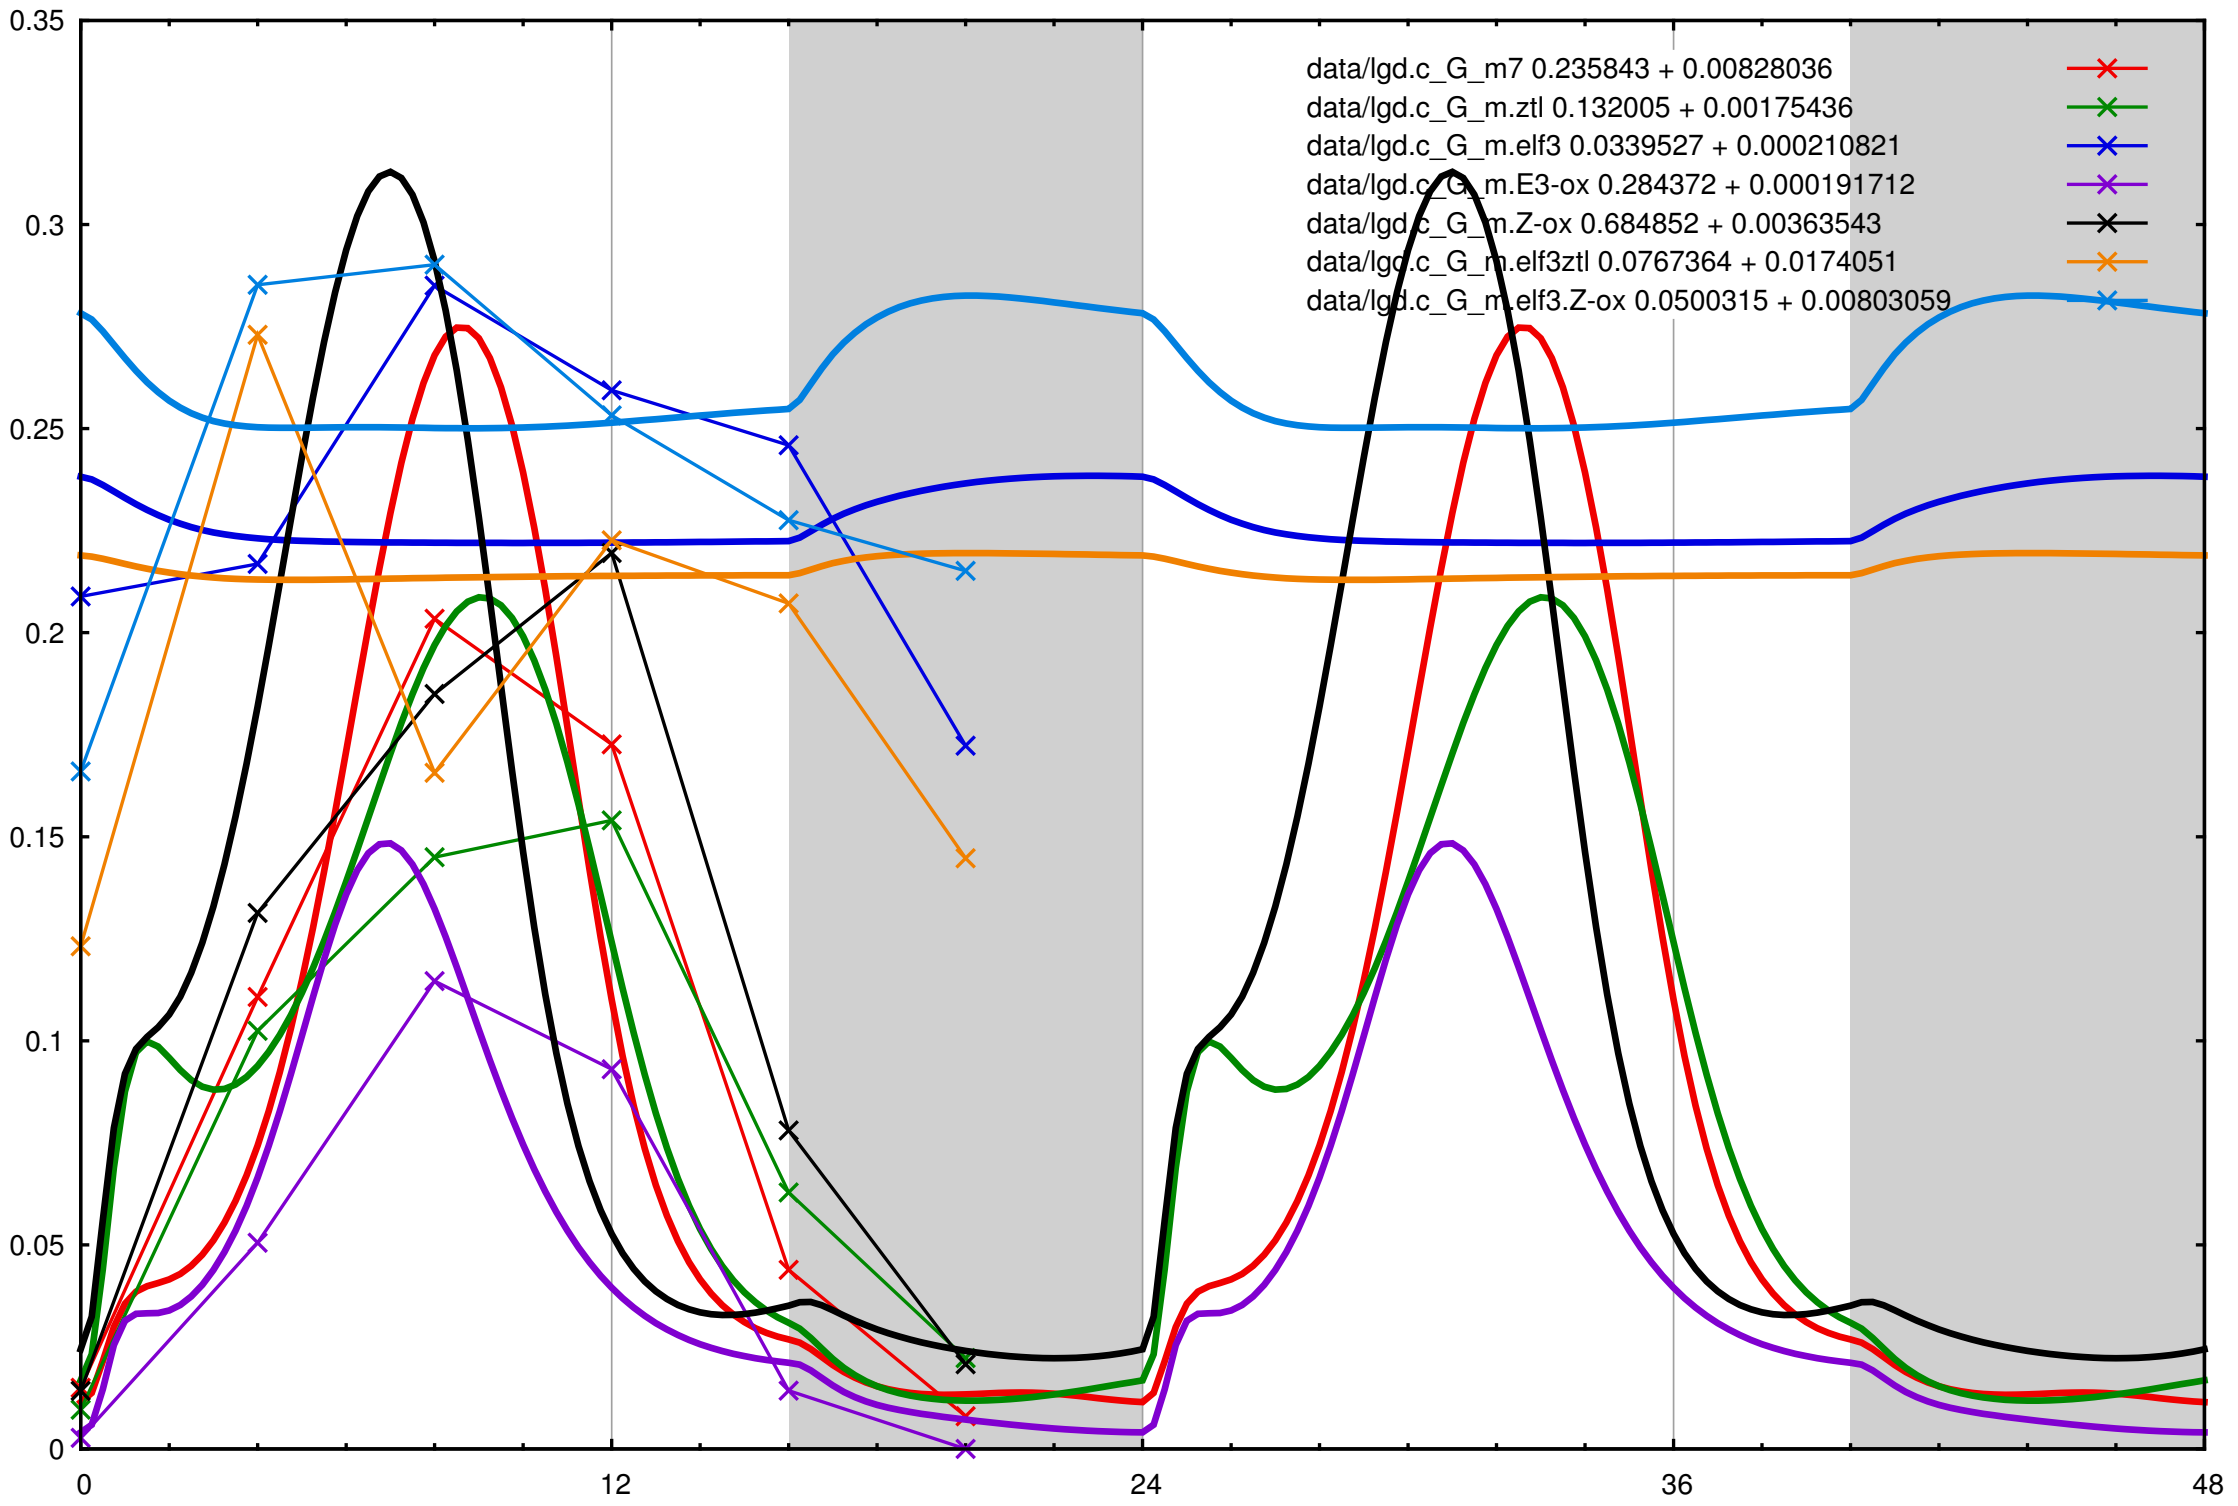

Scale group 116, scost 0.425403

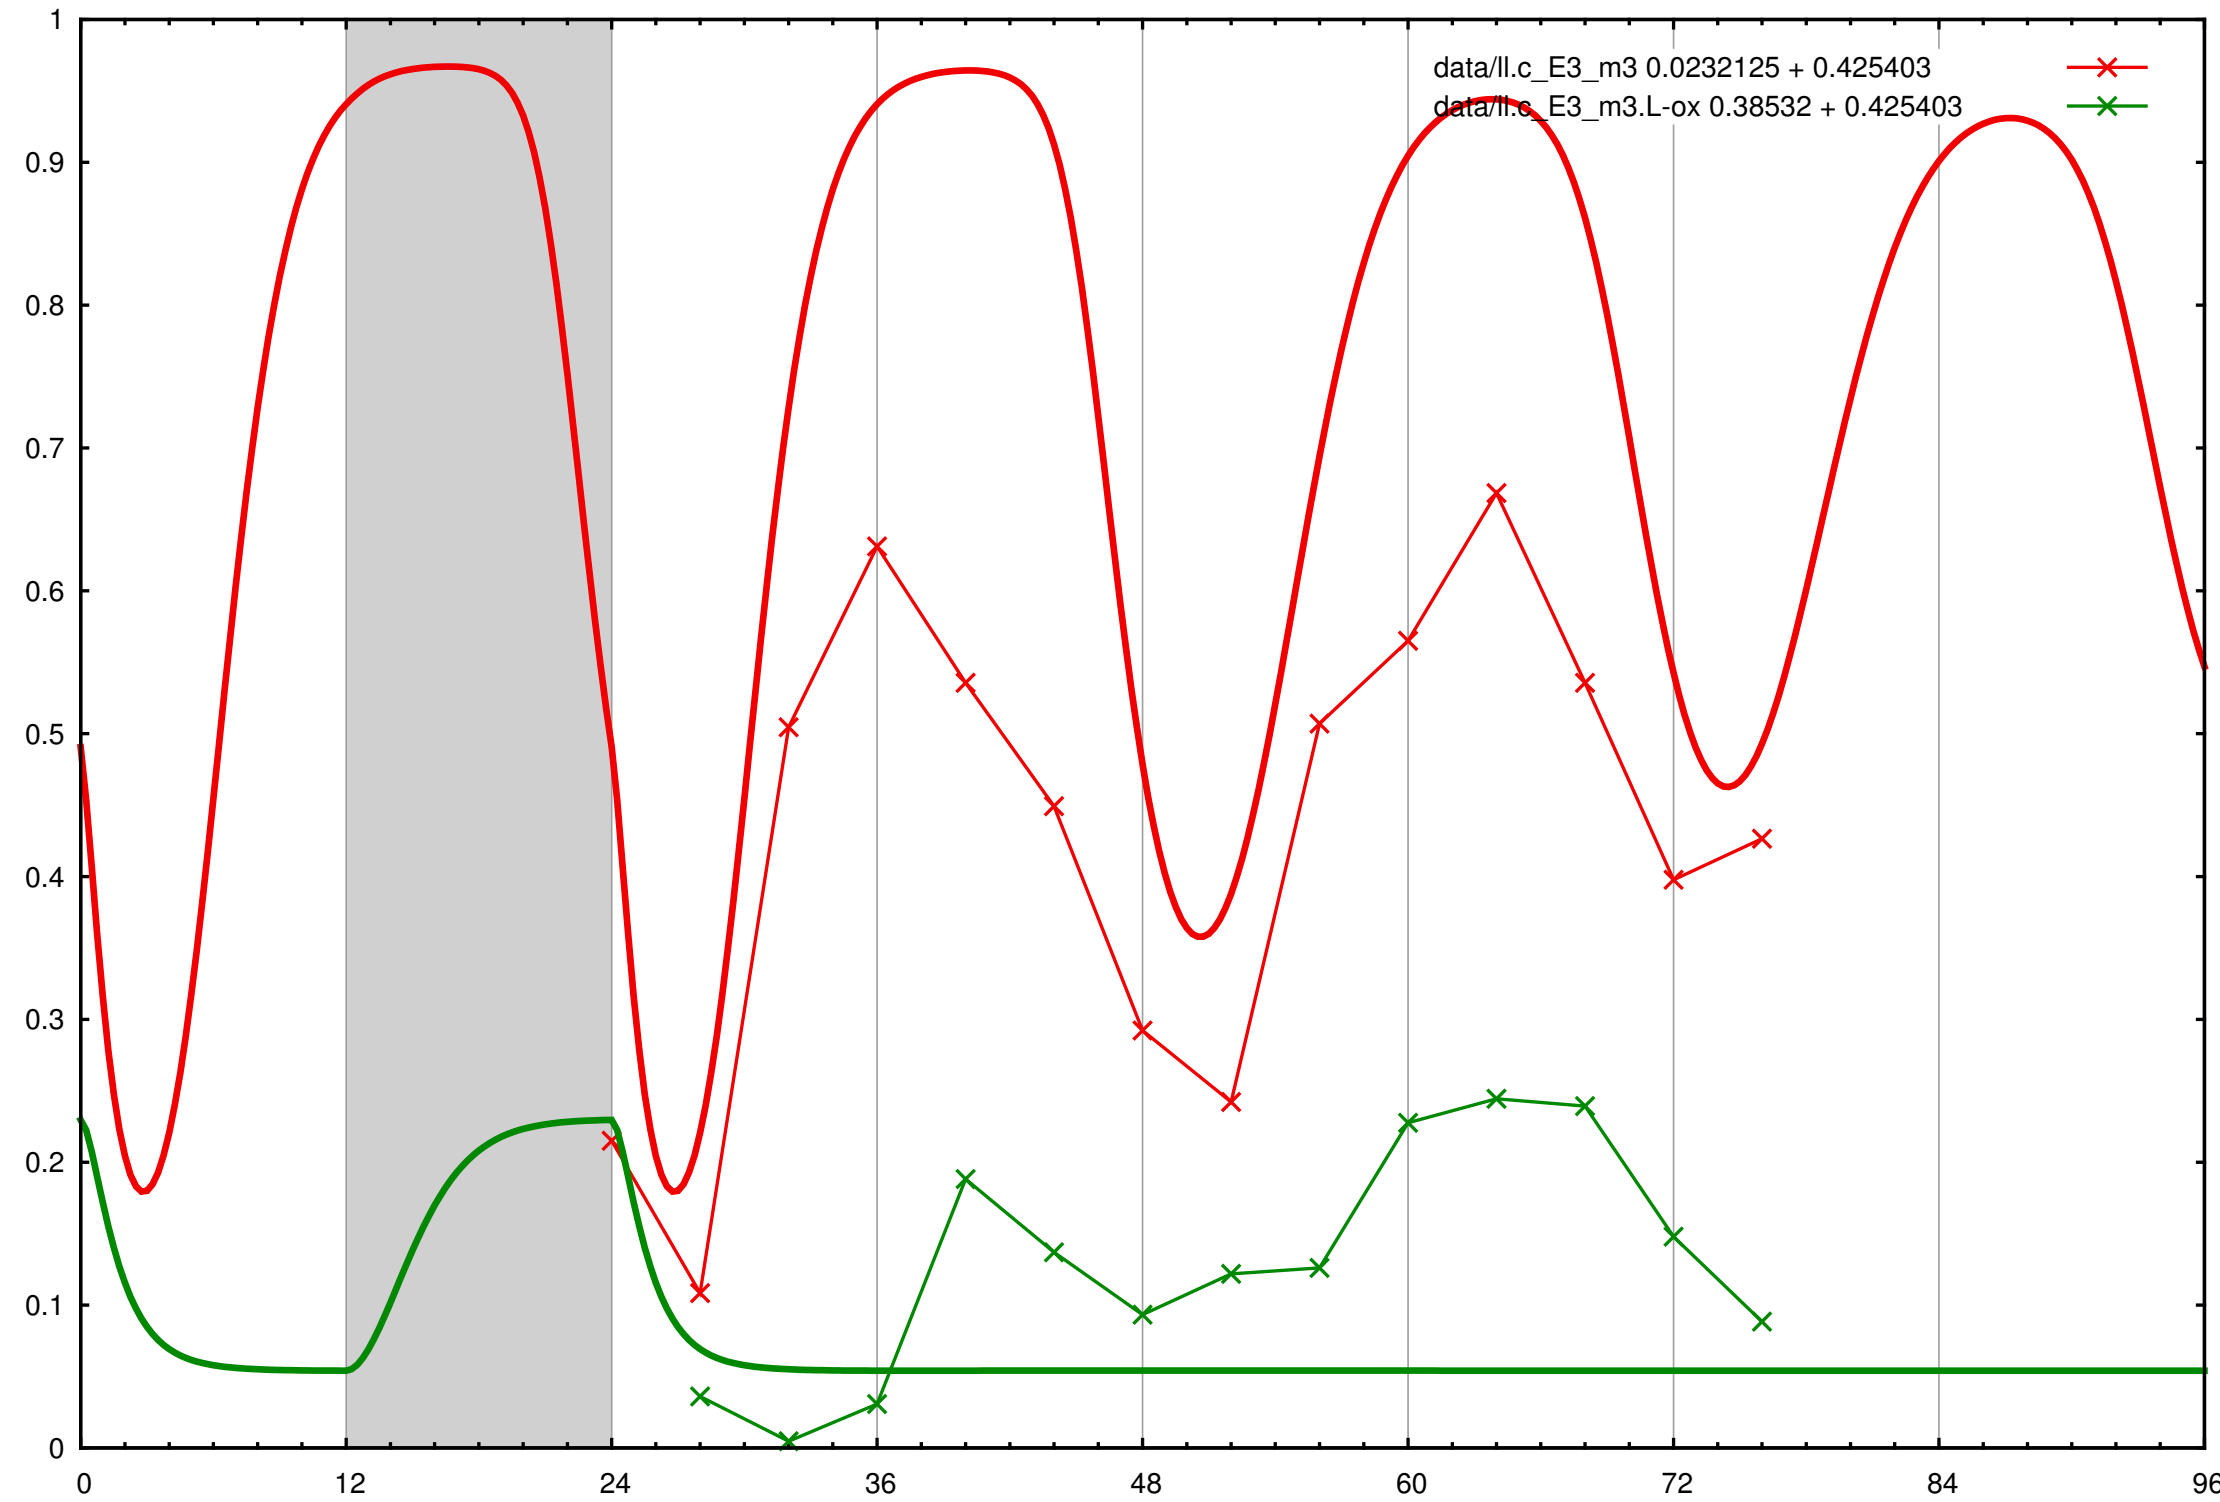

Scale group 117, scost 0

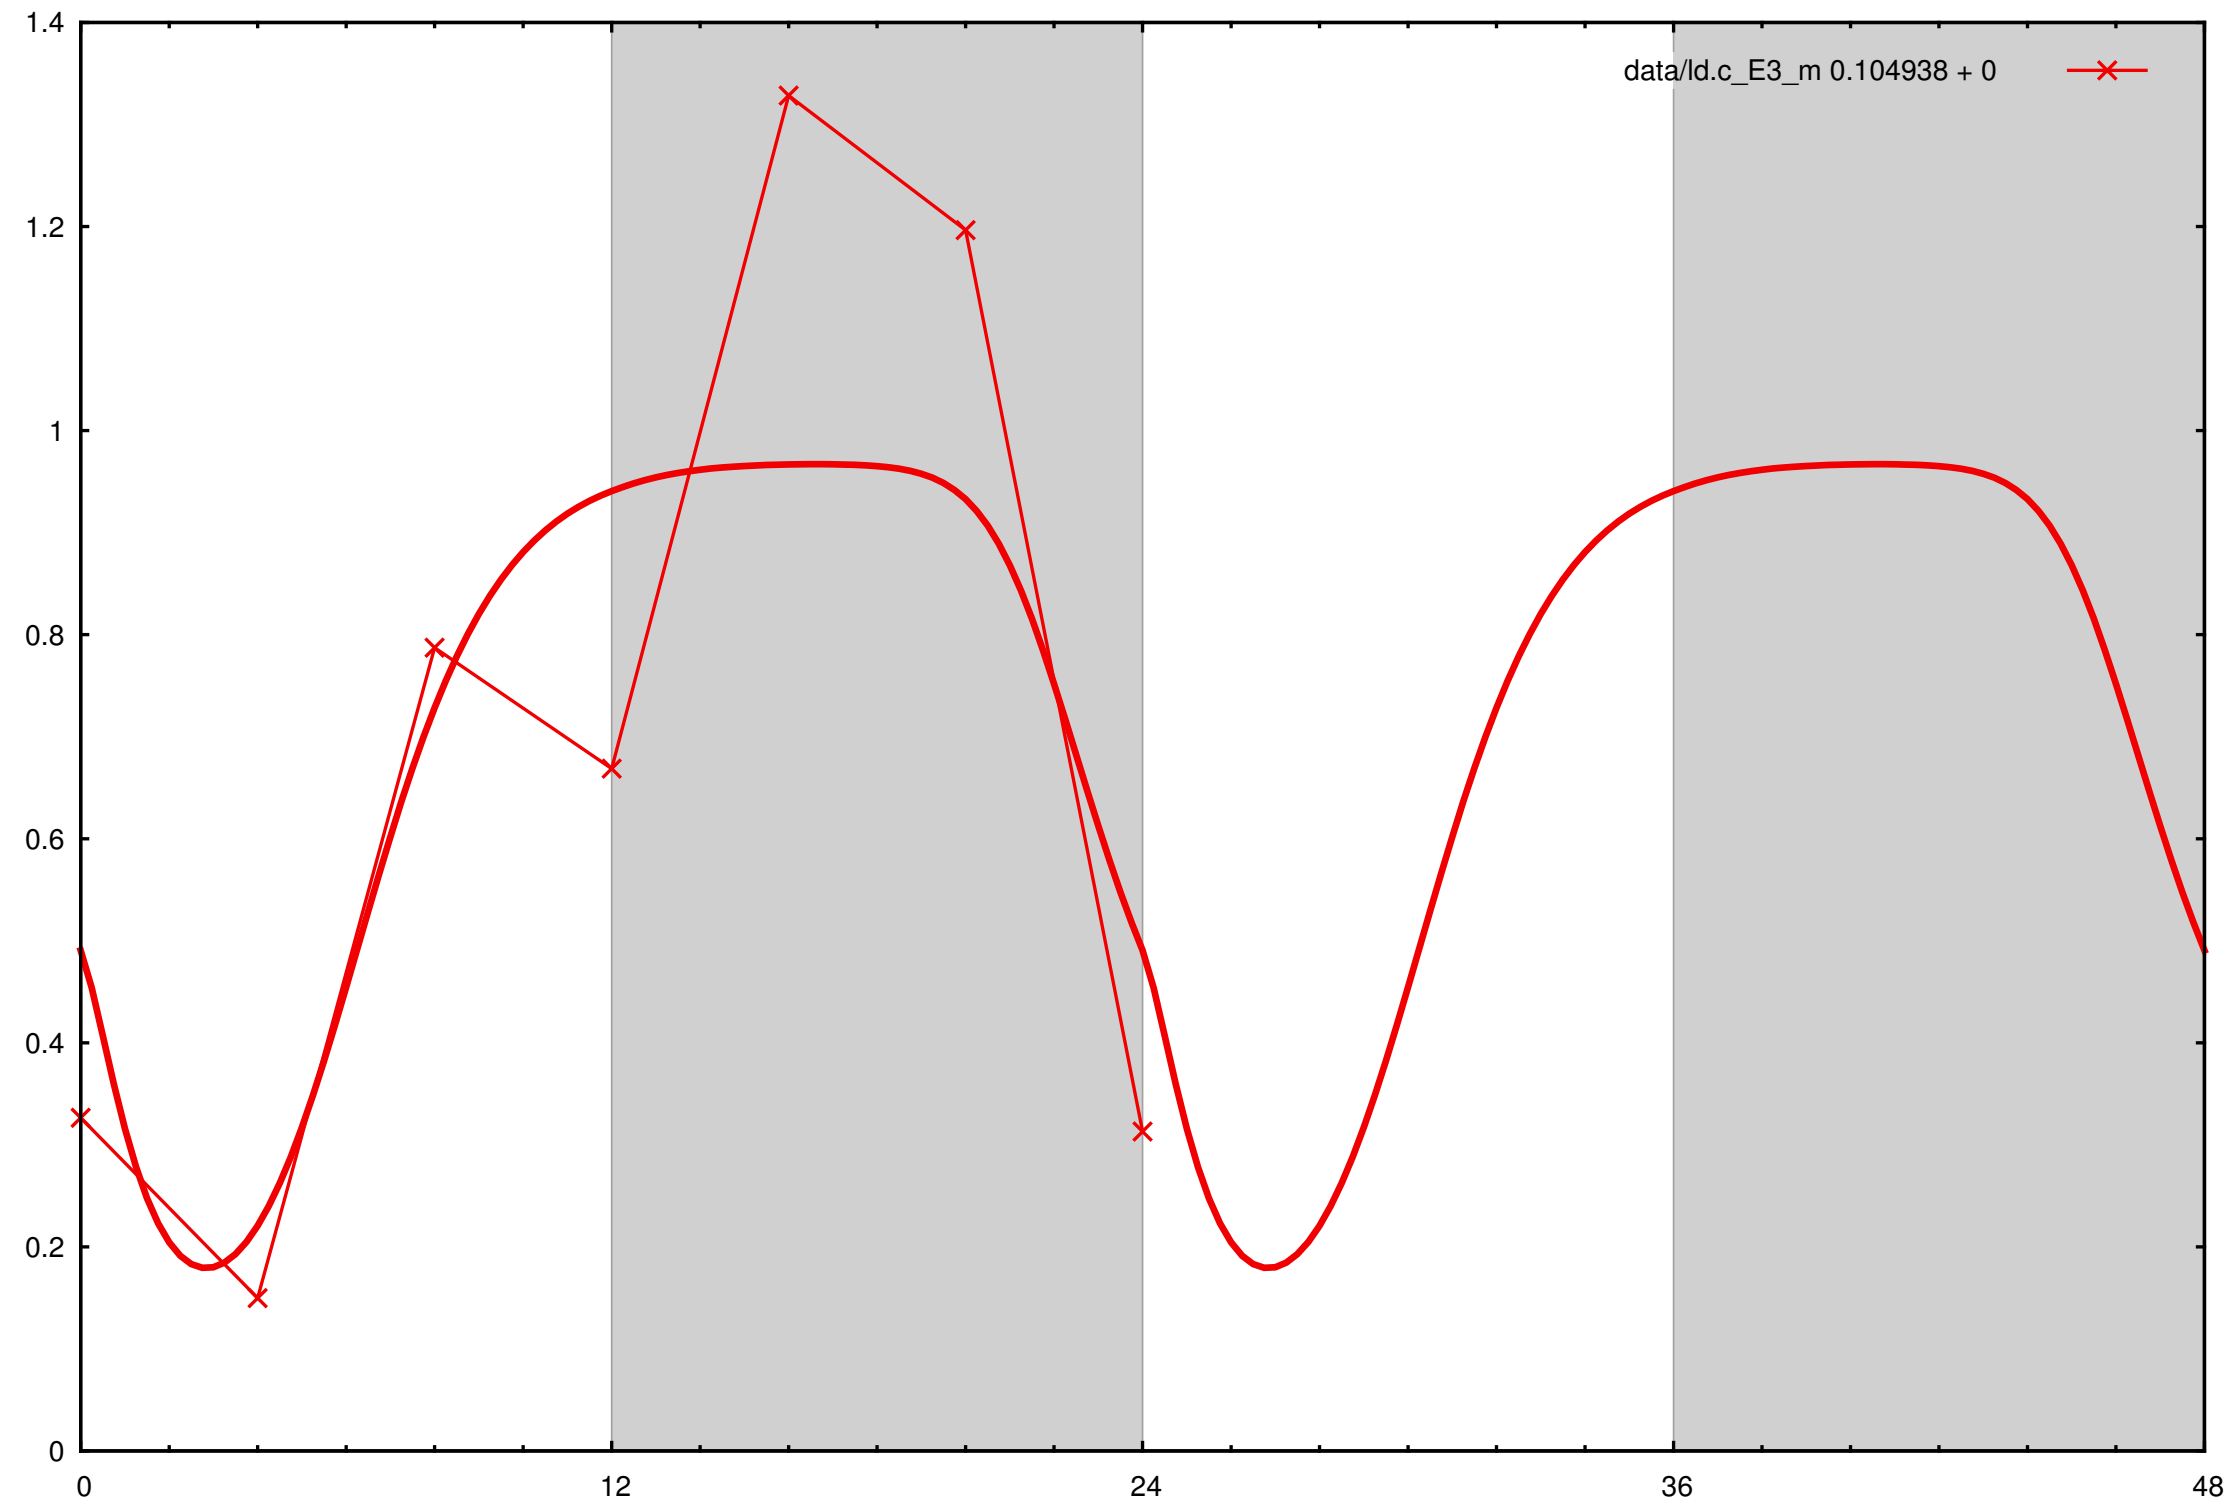

Scale group 118, scost 0.000707215

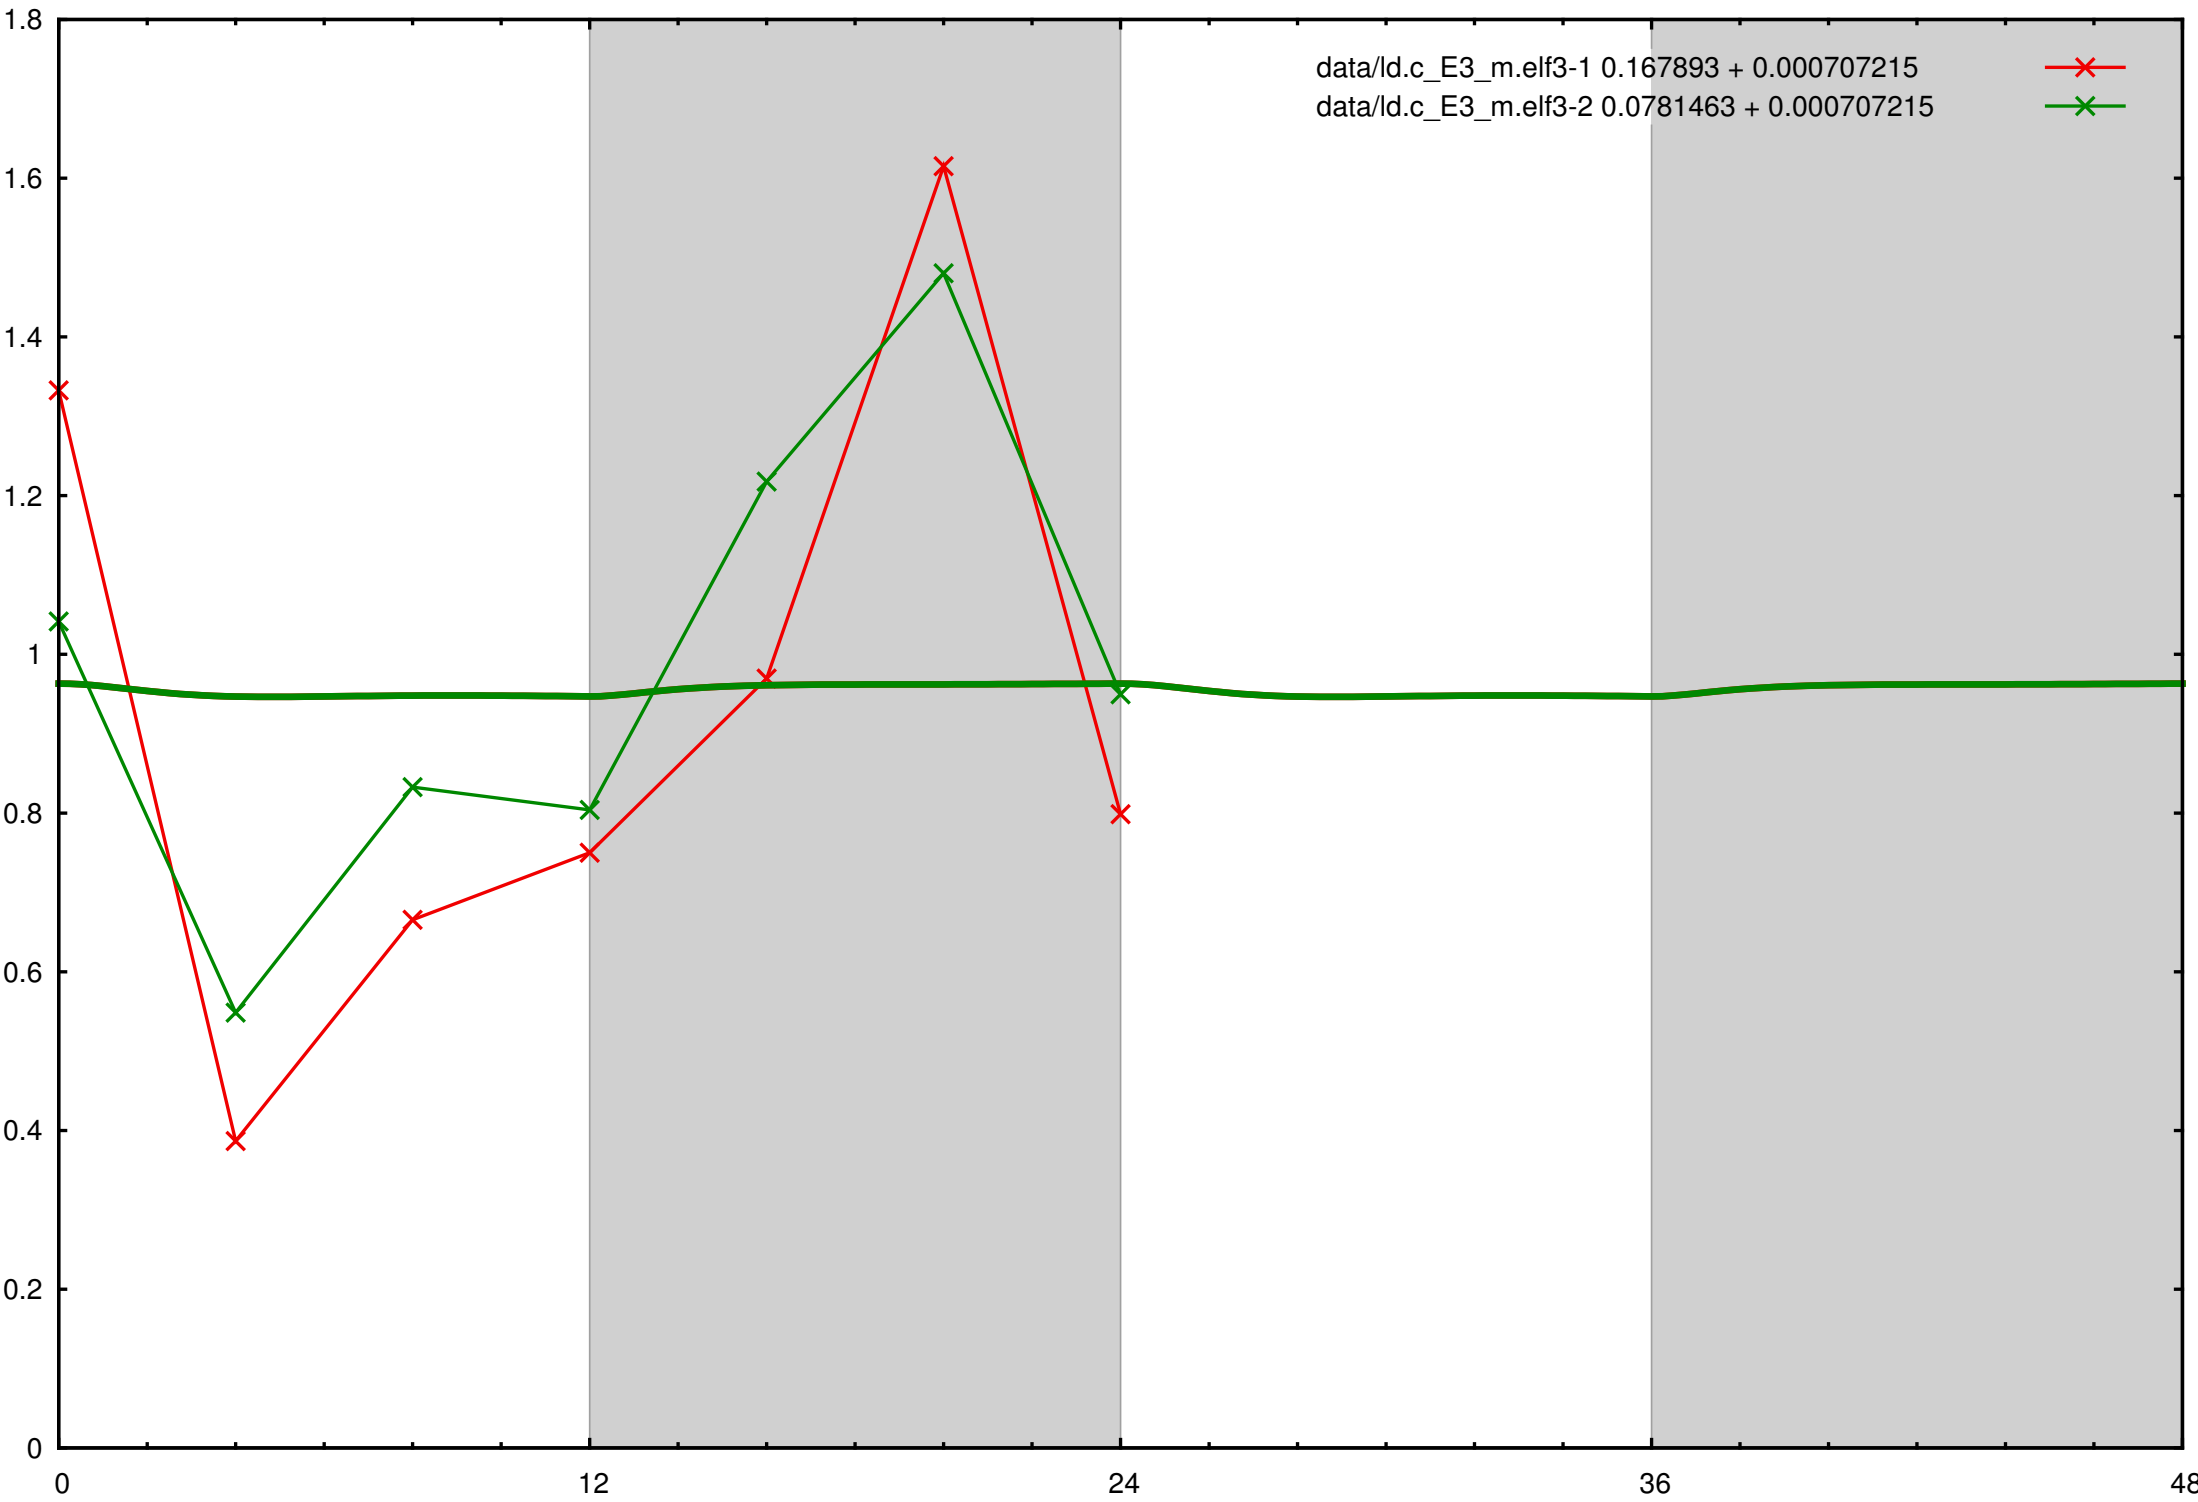

data/ld.c\_E3\_m.elf3-1 0.167893 + 0.000707215  
data/ld.c\_E3\_m.elf3-2 0.0781463 + 0.000707215

x  
x

Scale group 119, scost 0.00844774

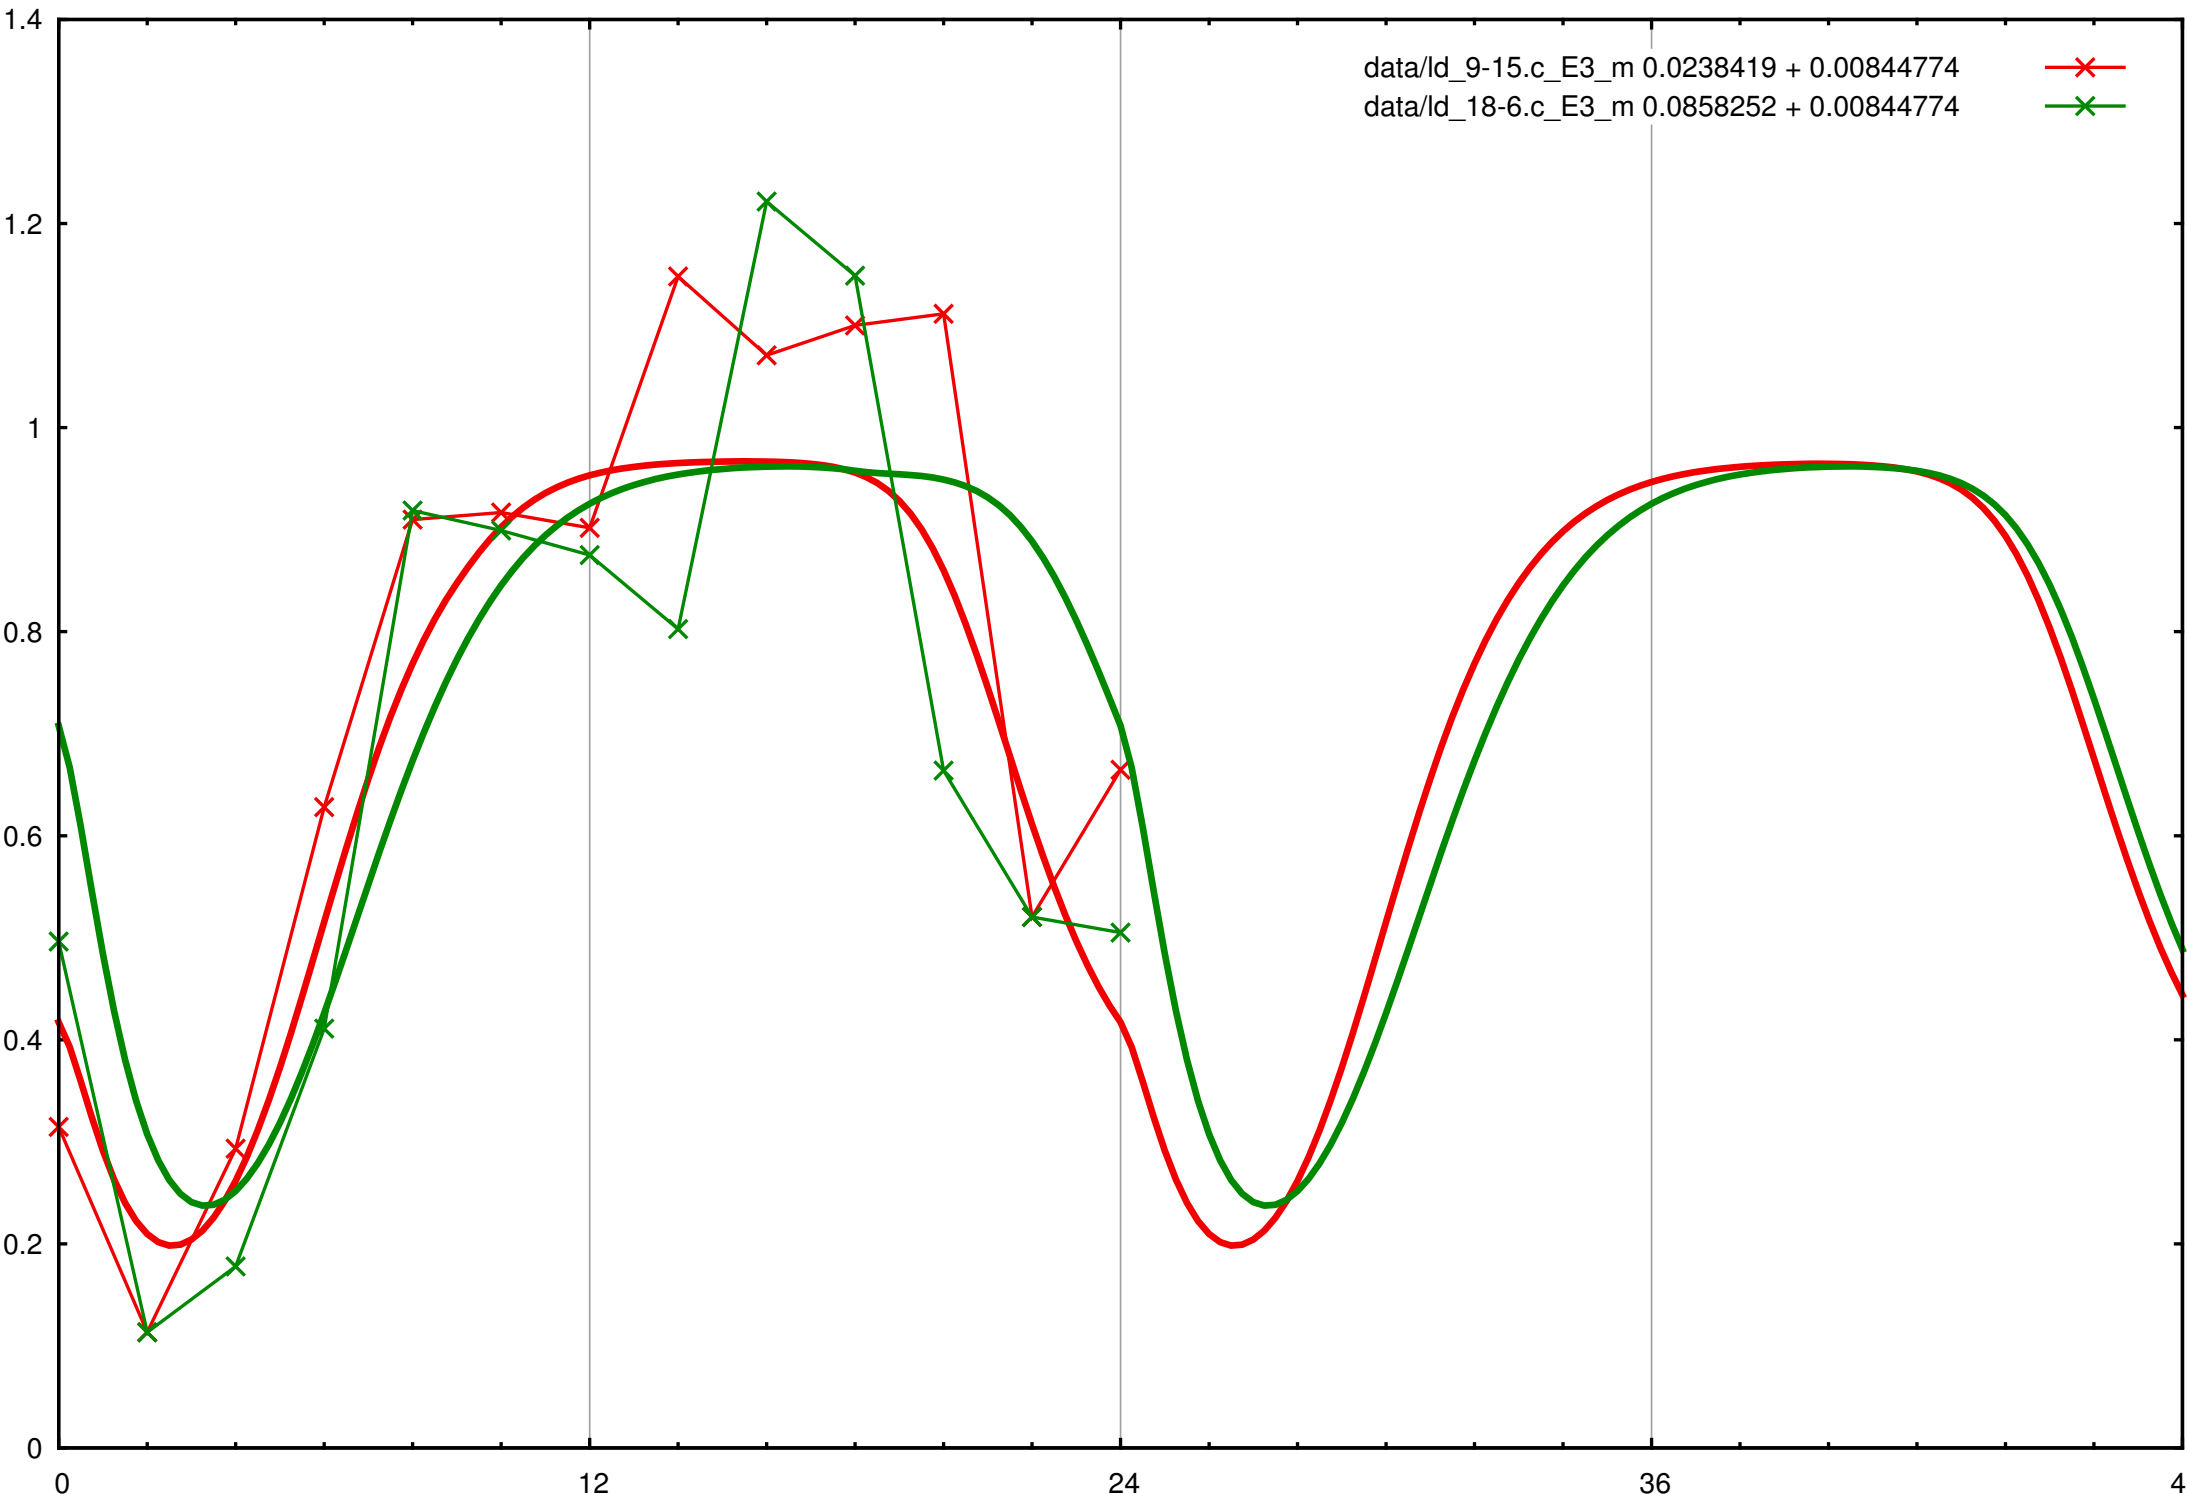

Scale group 120, scost 0.035042

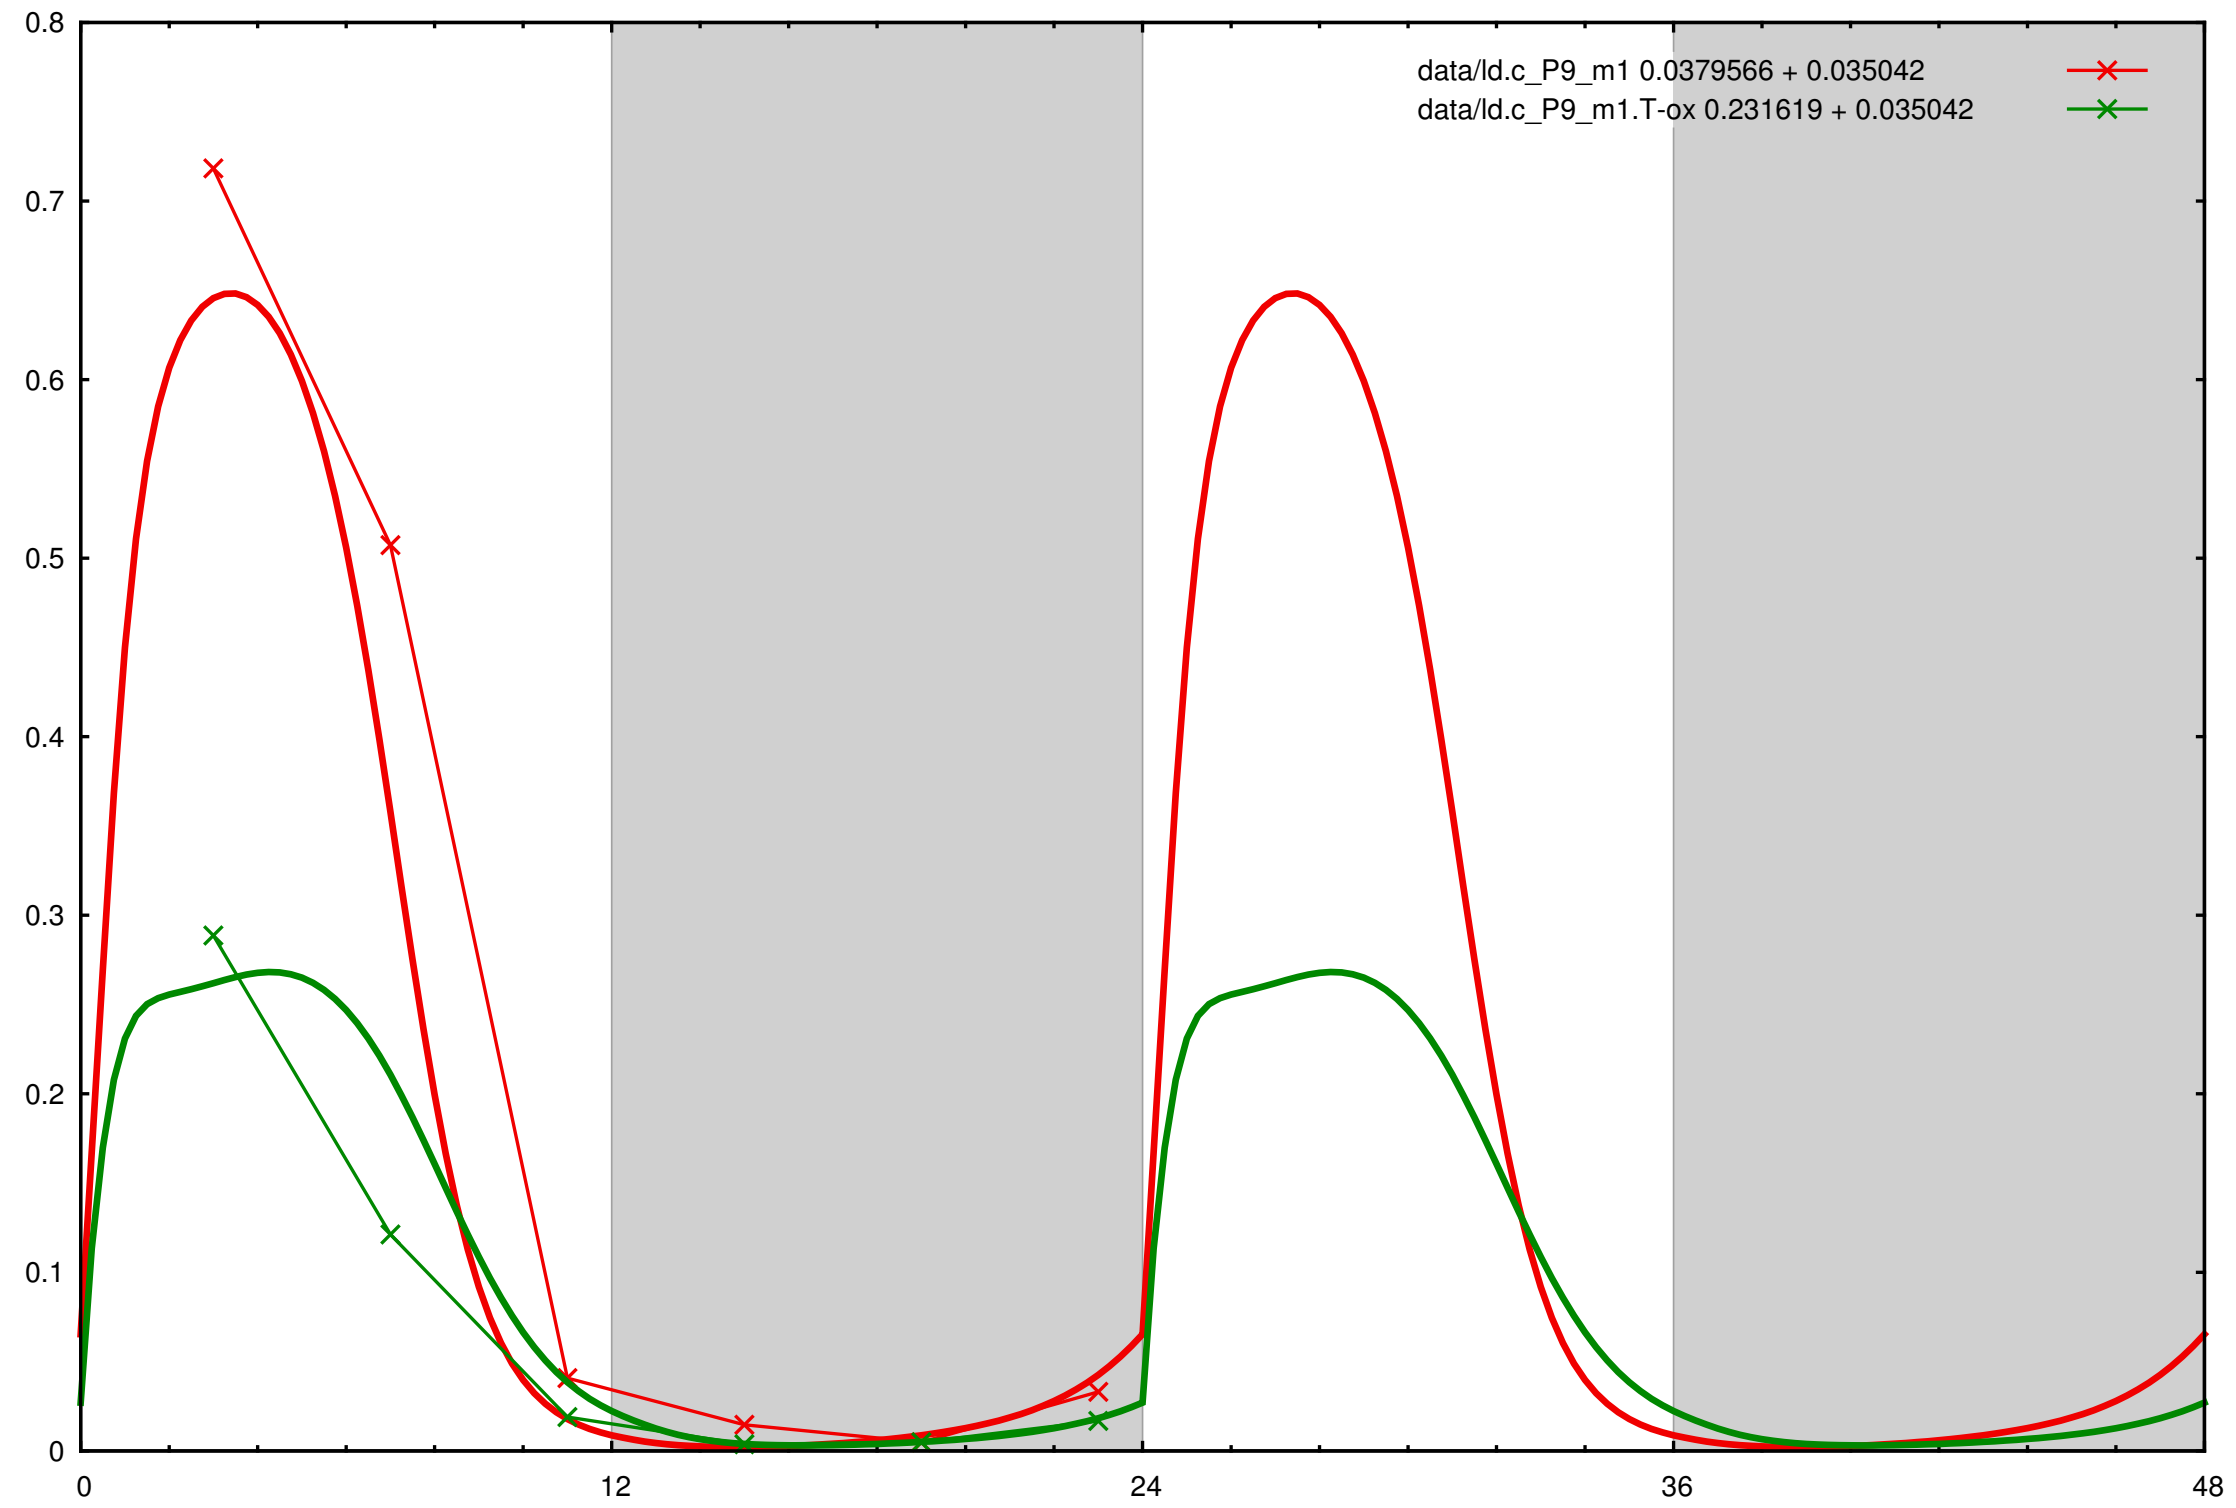



Scale group 121, scost 0.0458454

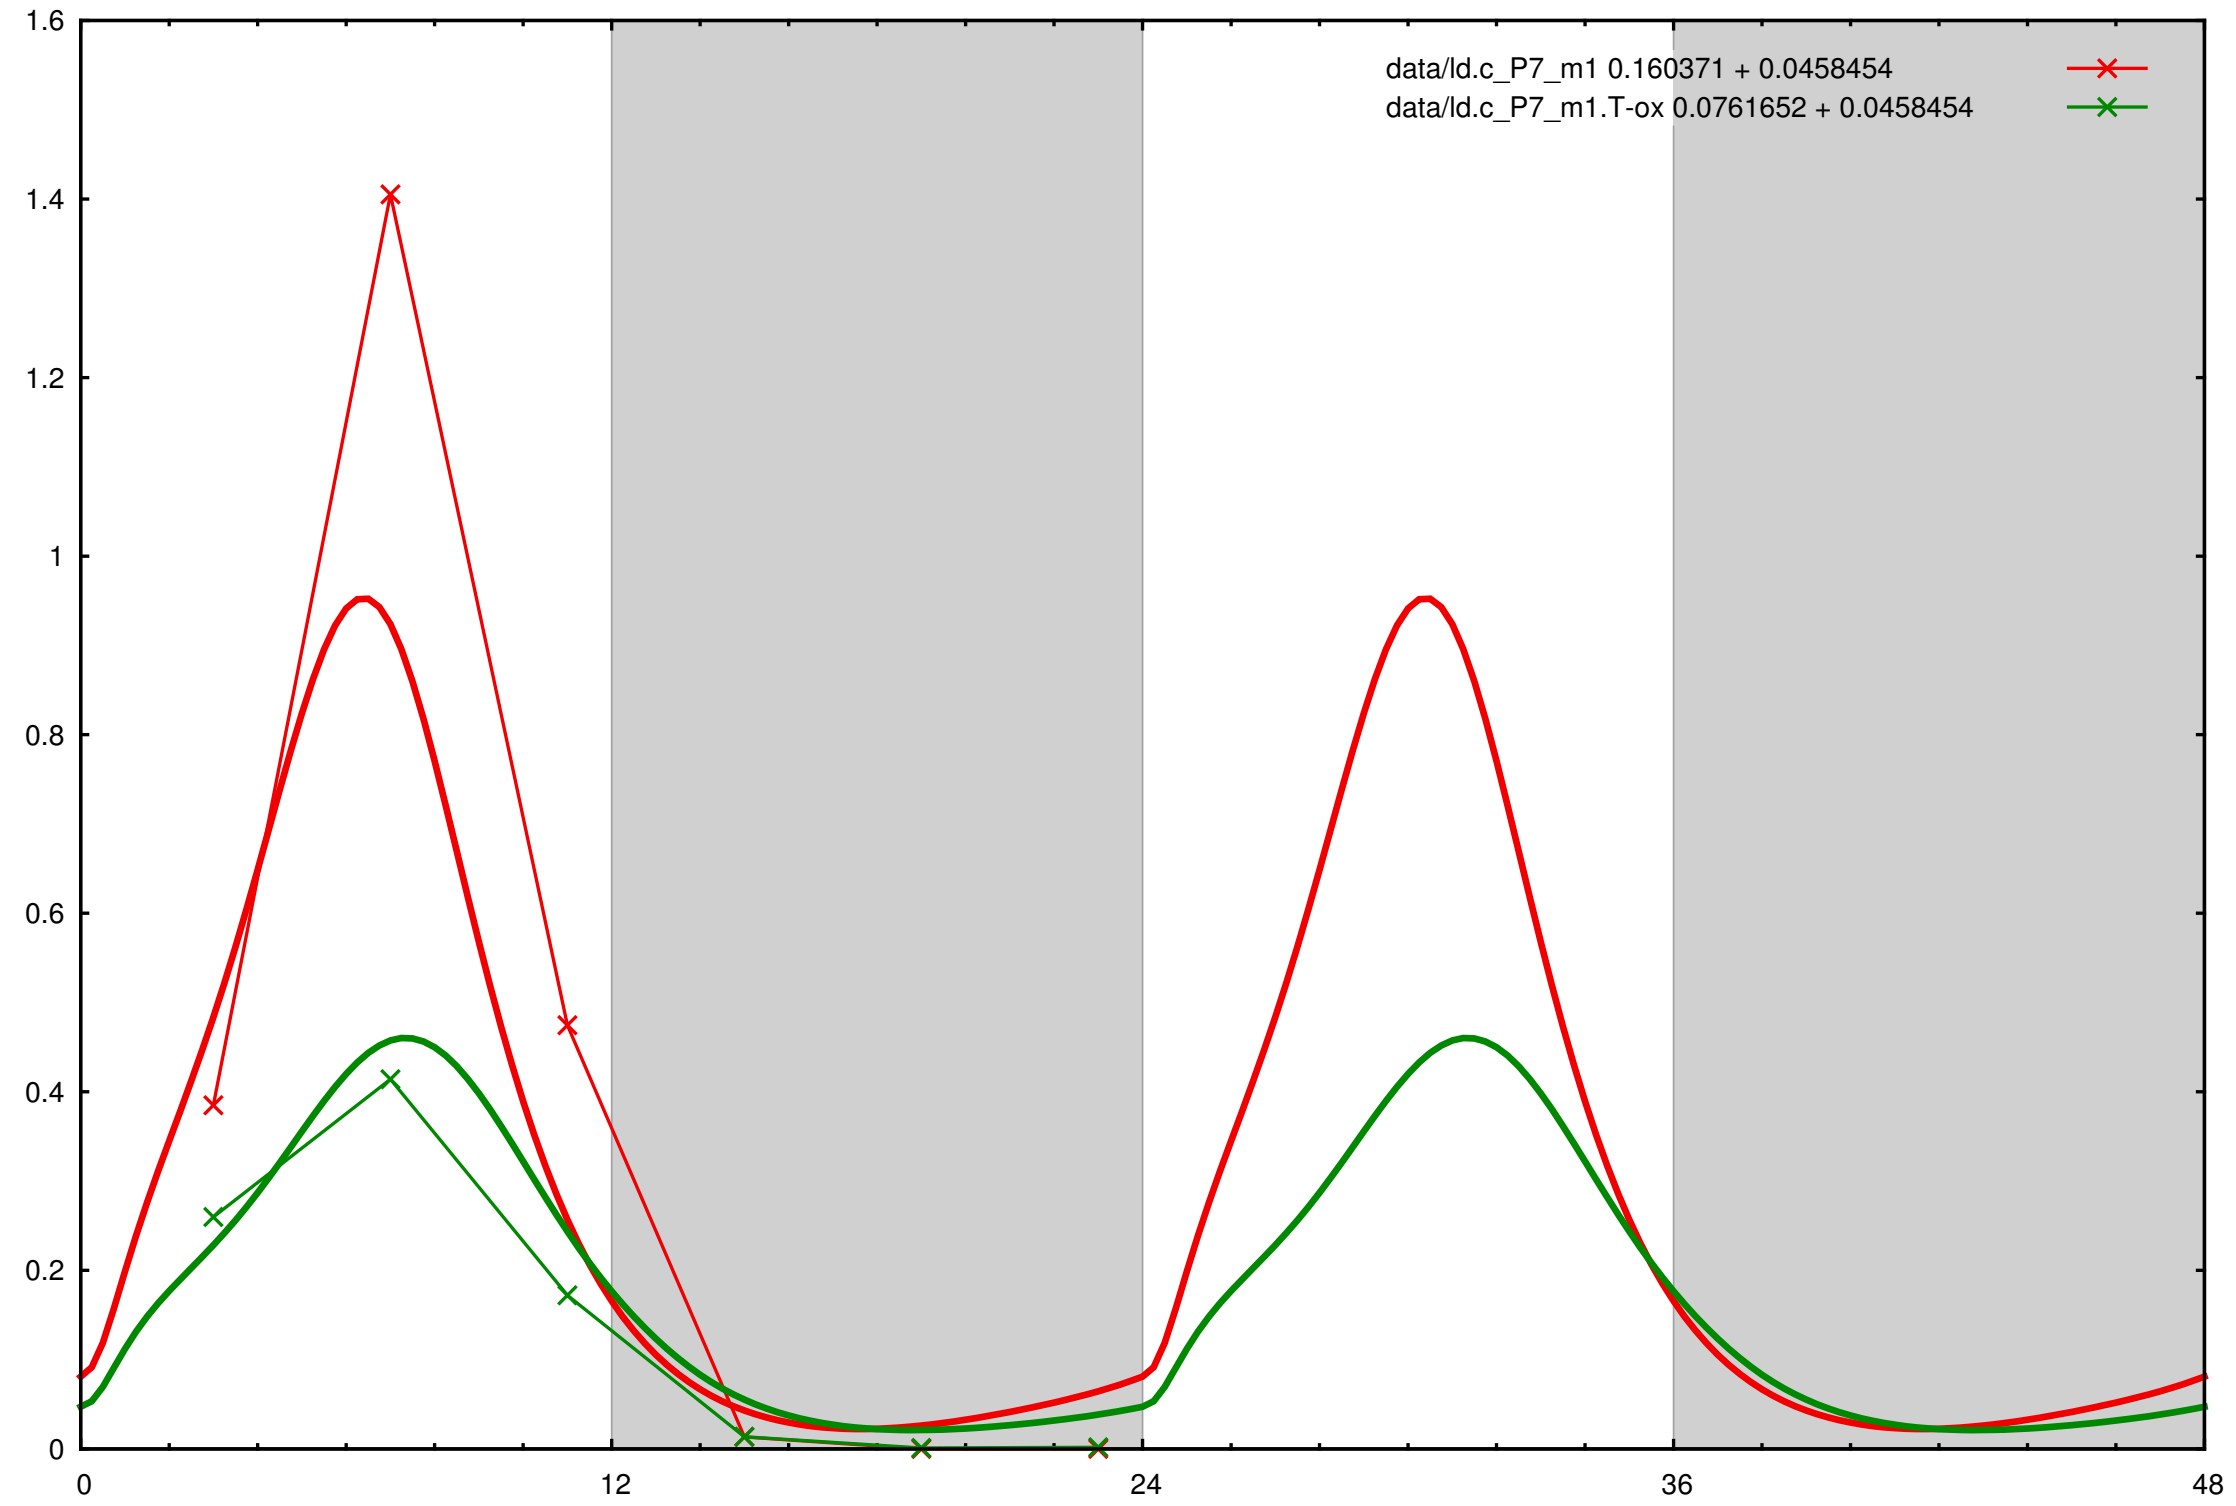

Scale group 122, scost 0.501903

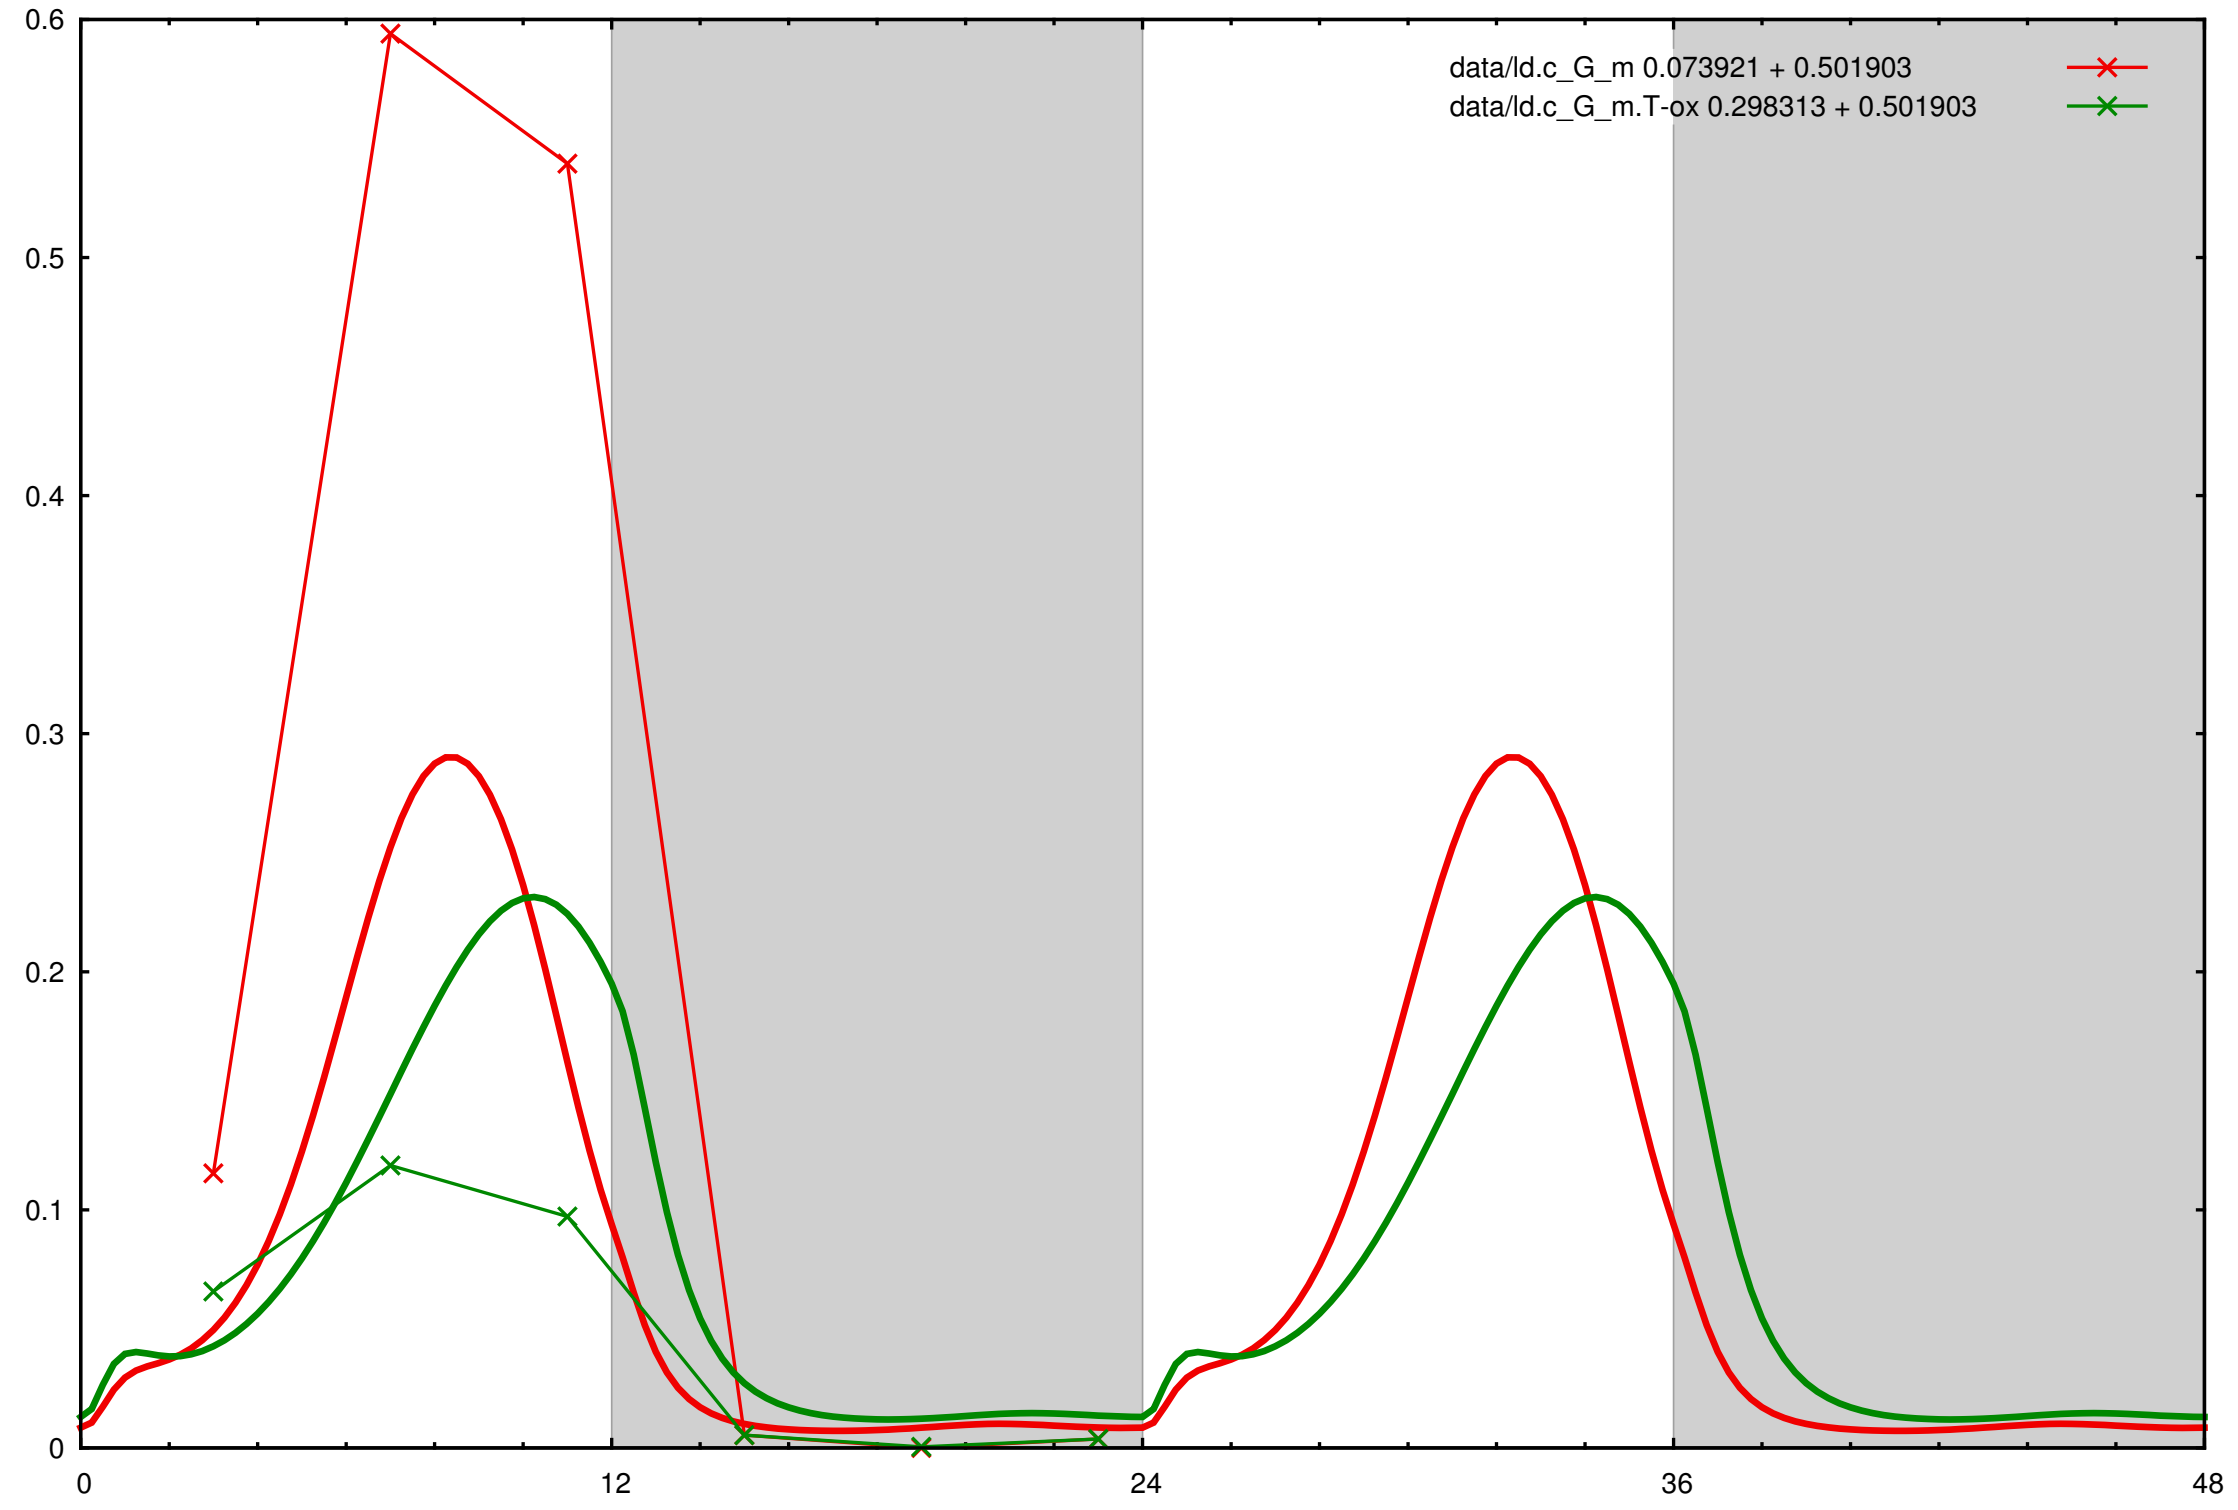

Scale group 123, scost 0.000597131

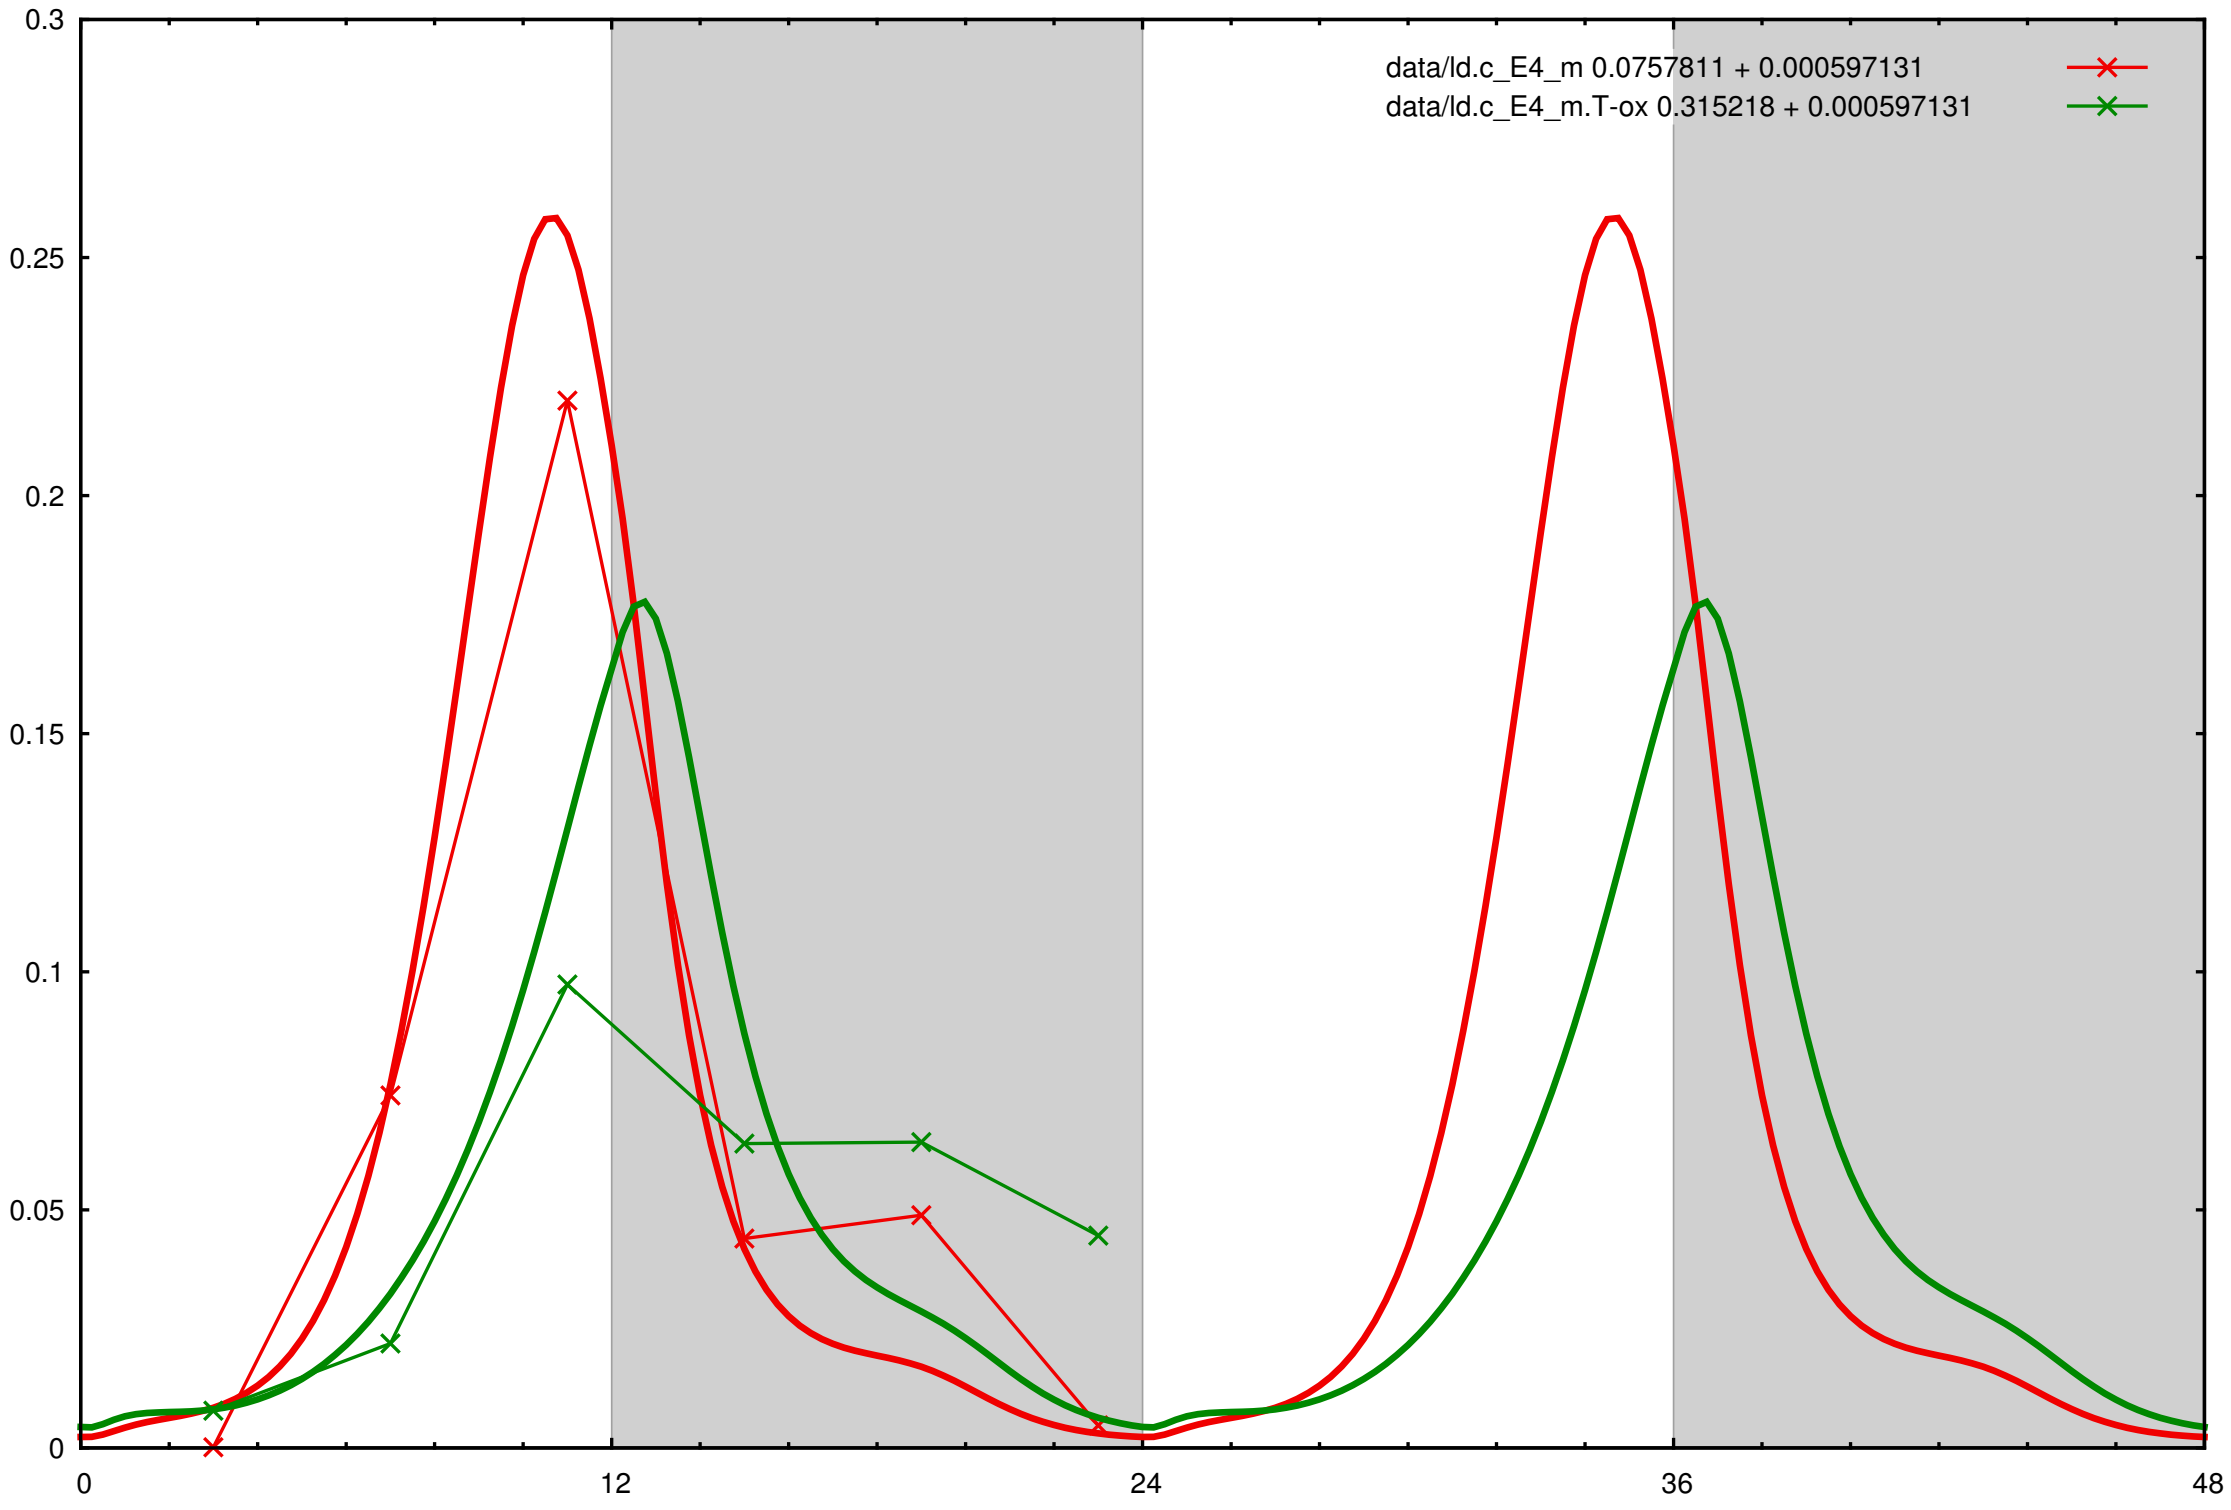

Scale group 124, scost 0.0417362

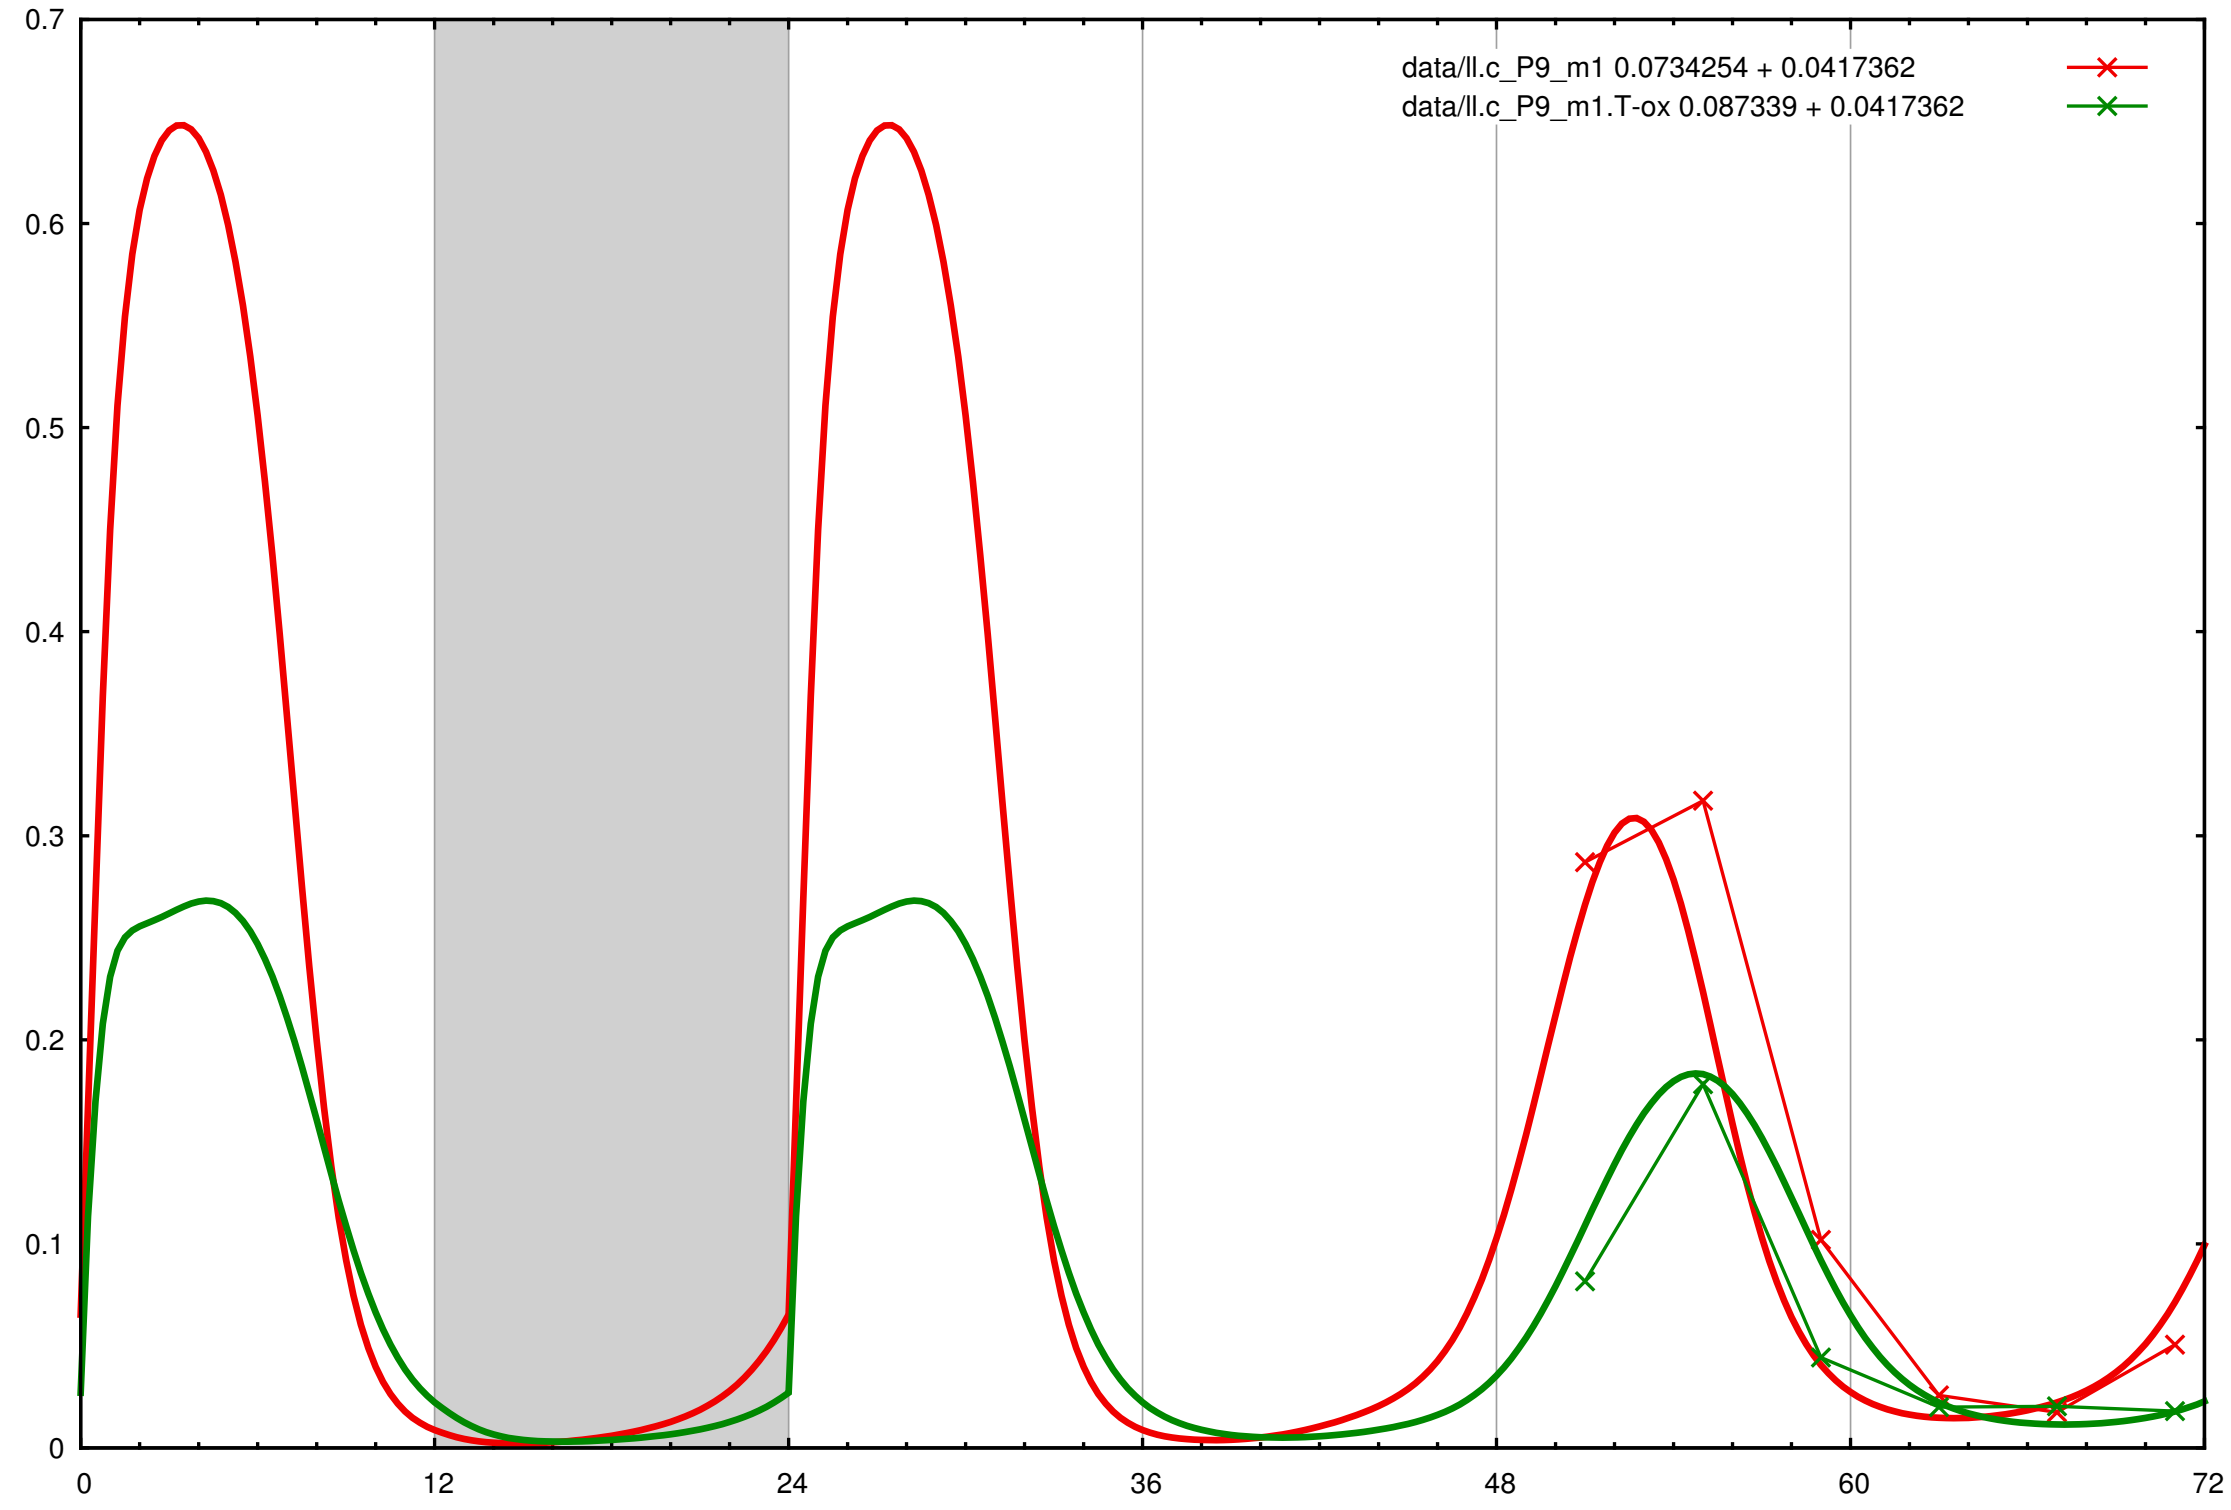

Scale group 125, scost 0.0102123

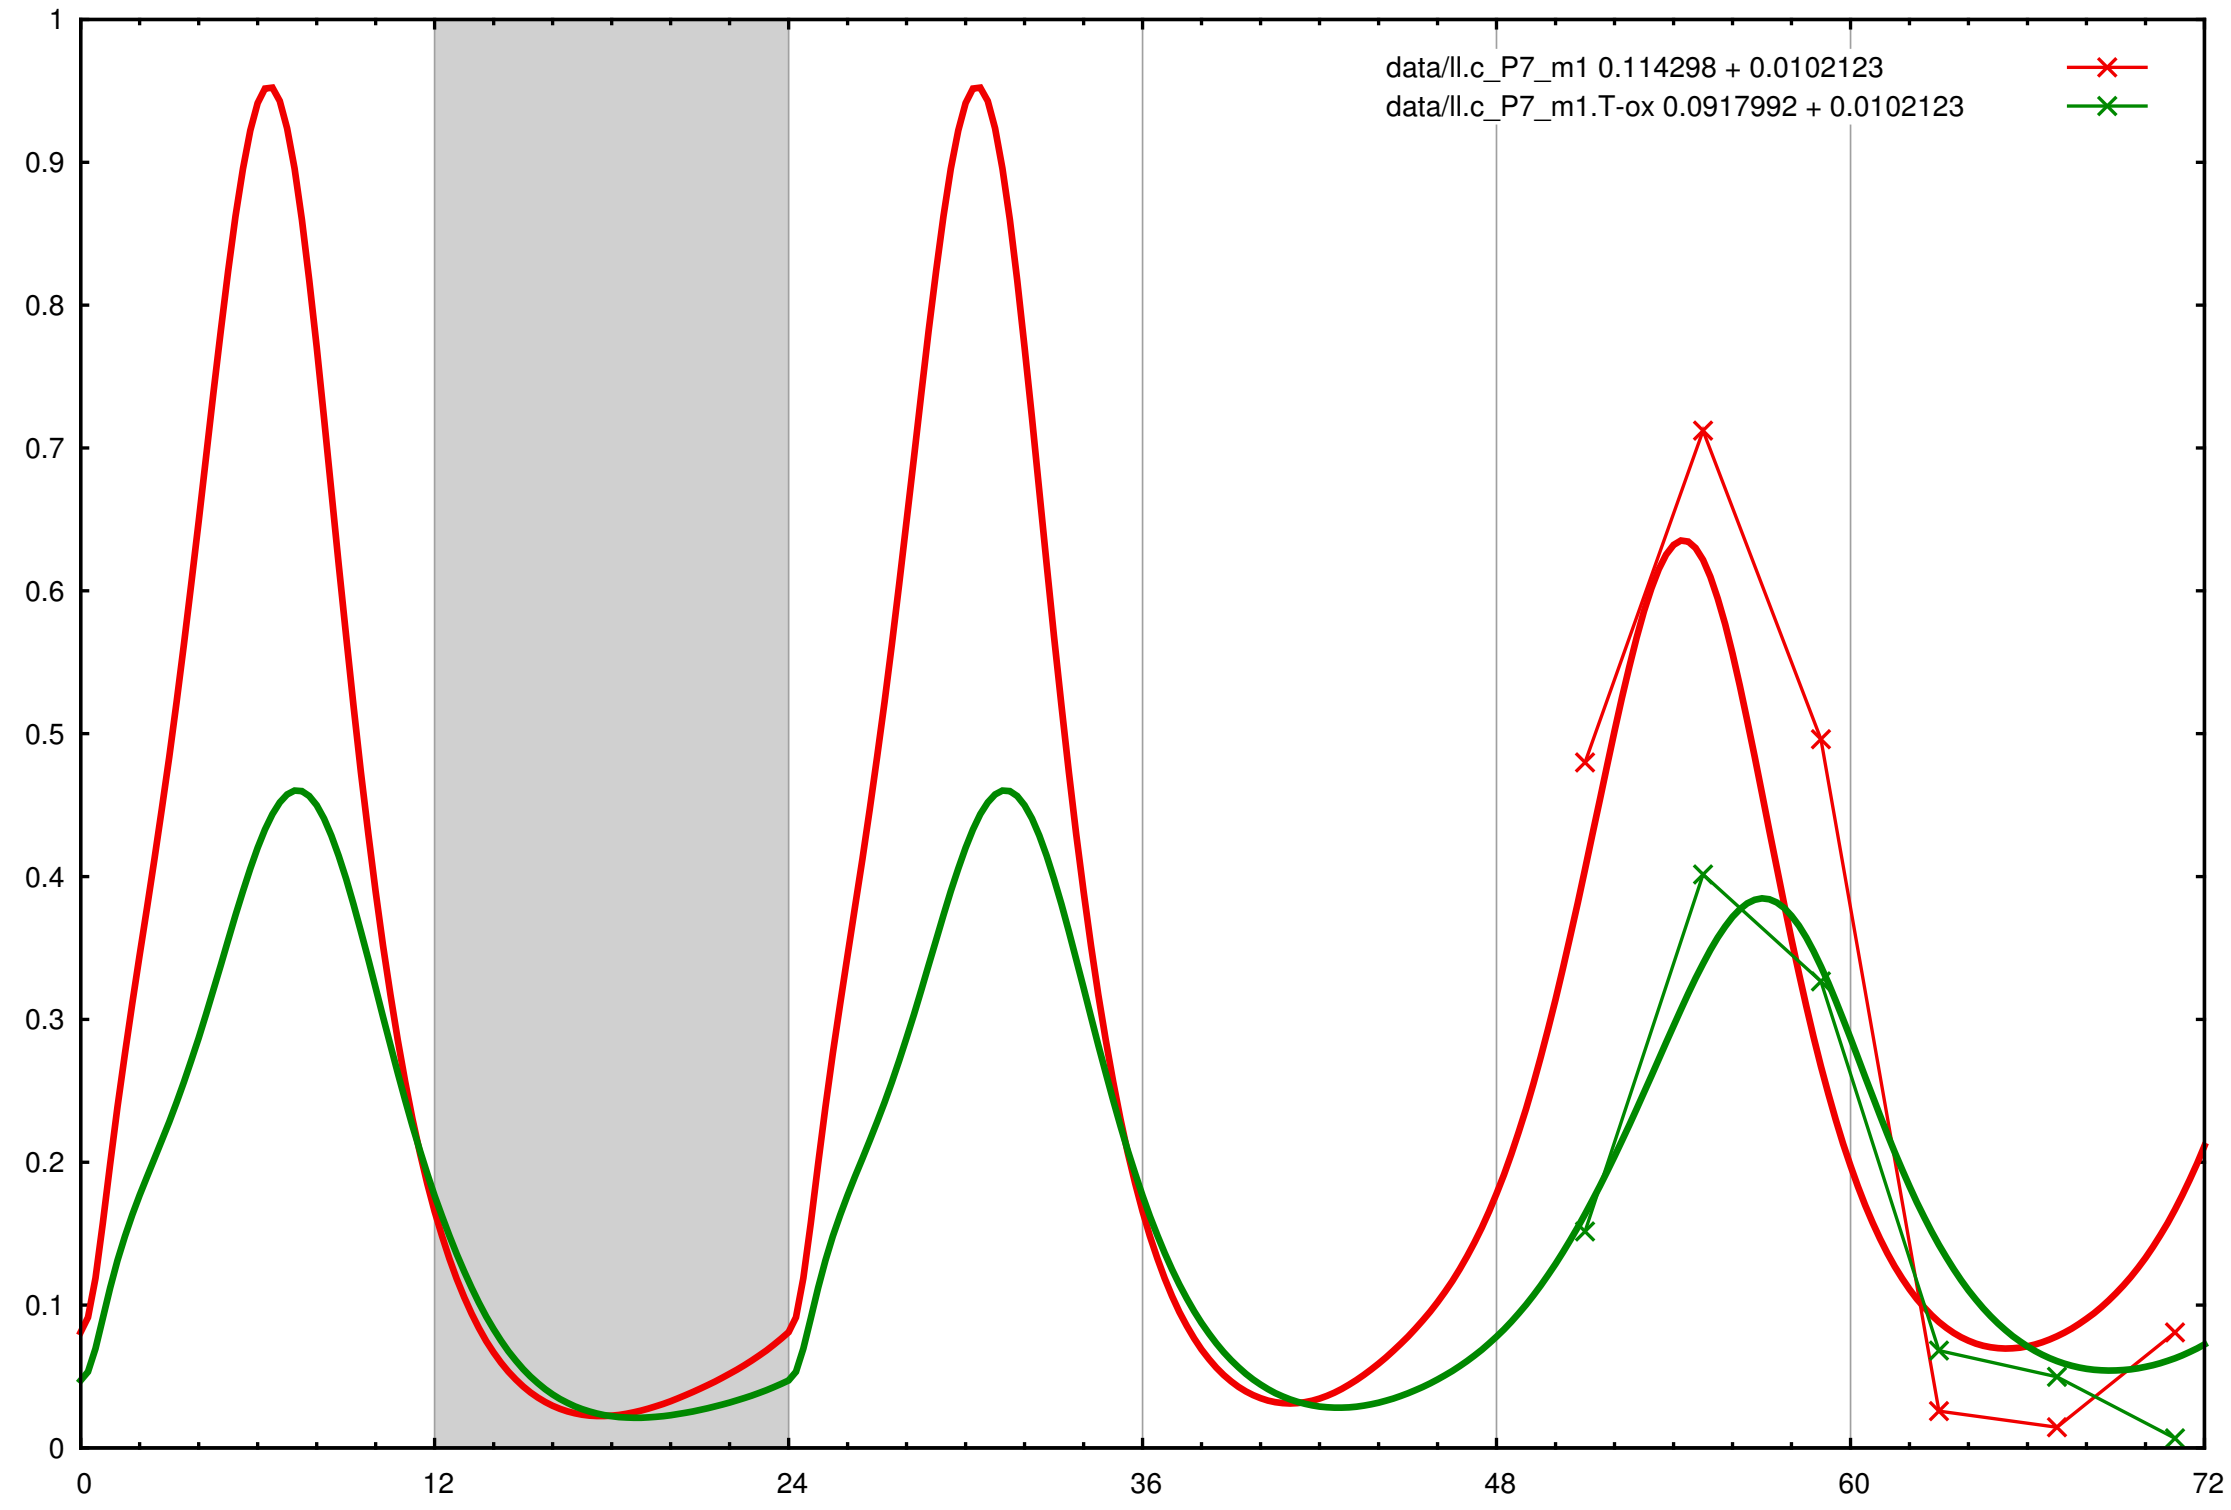

Scale group 126, scost 0.296285

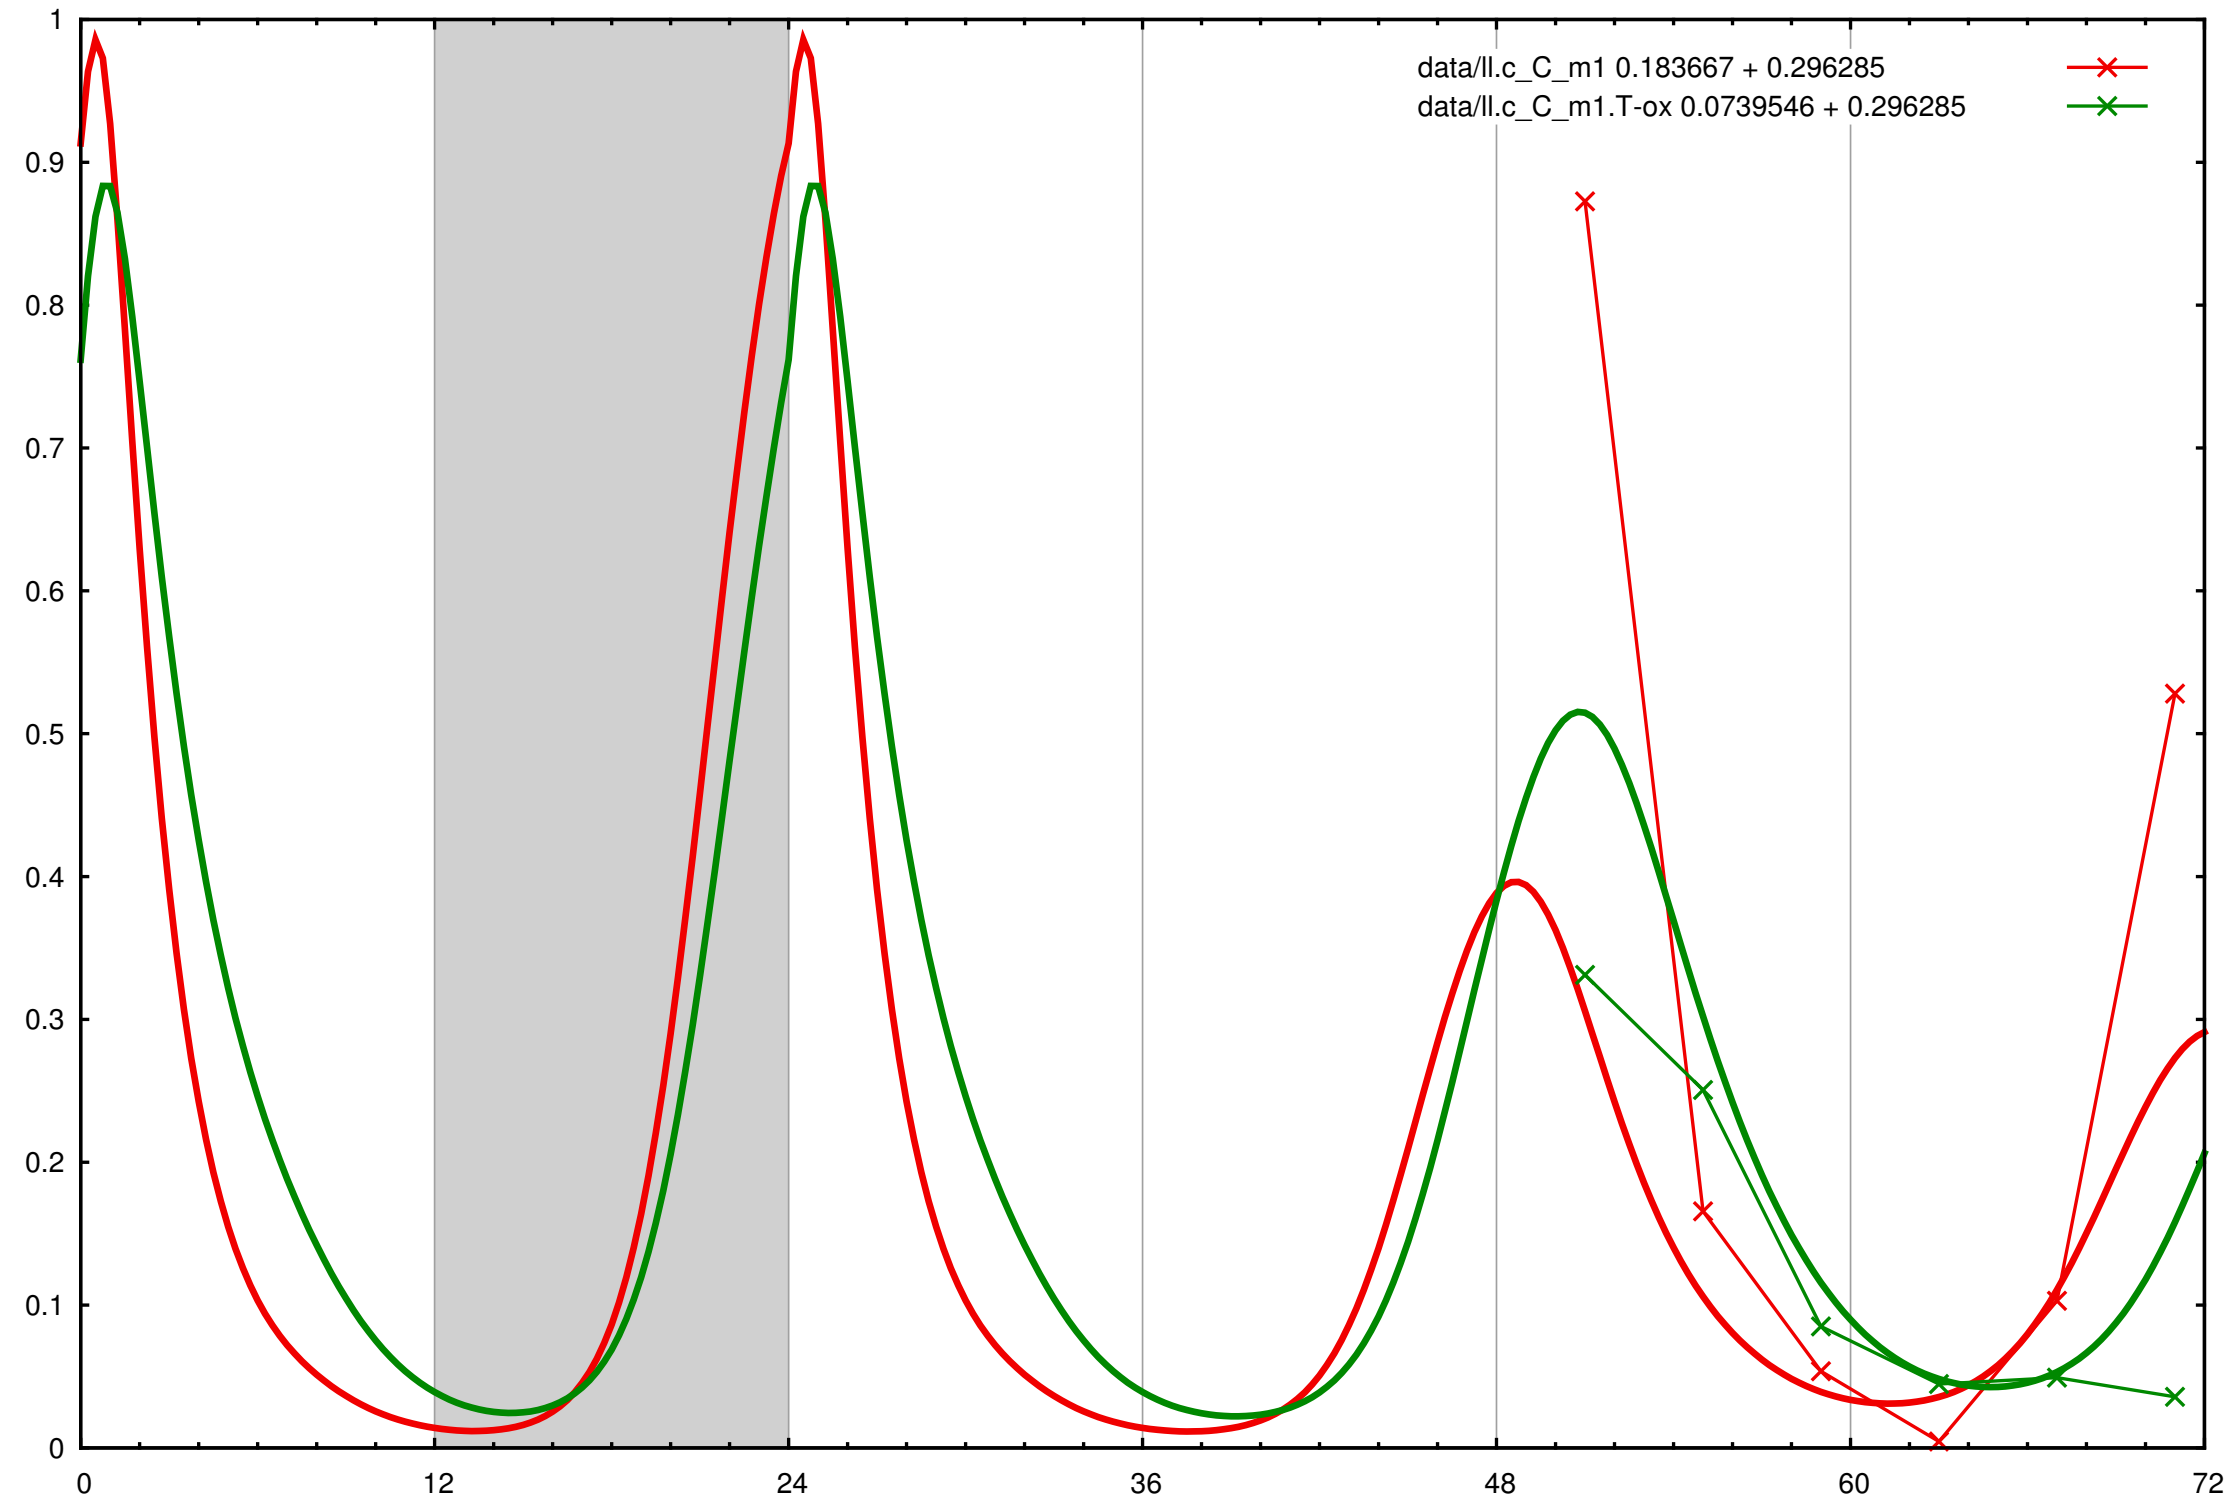

Scale group 127, scost 0.2459

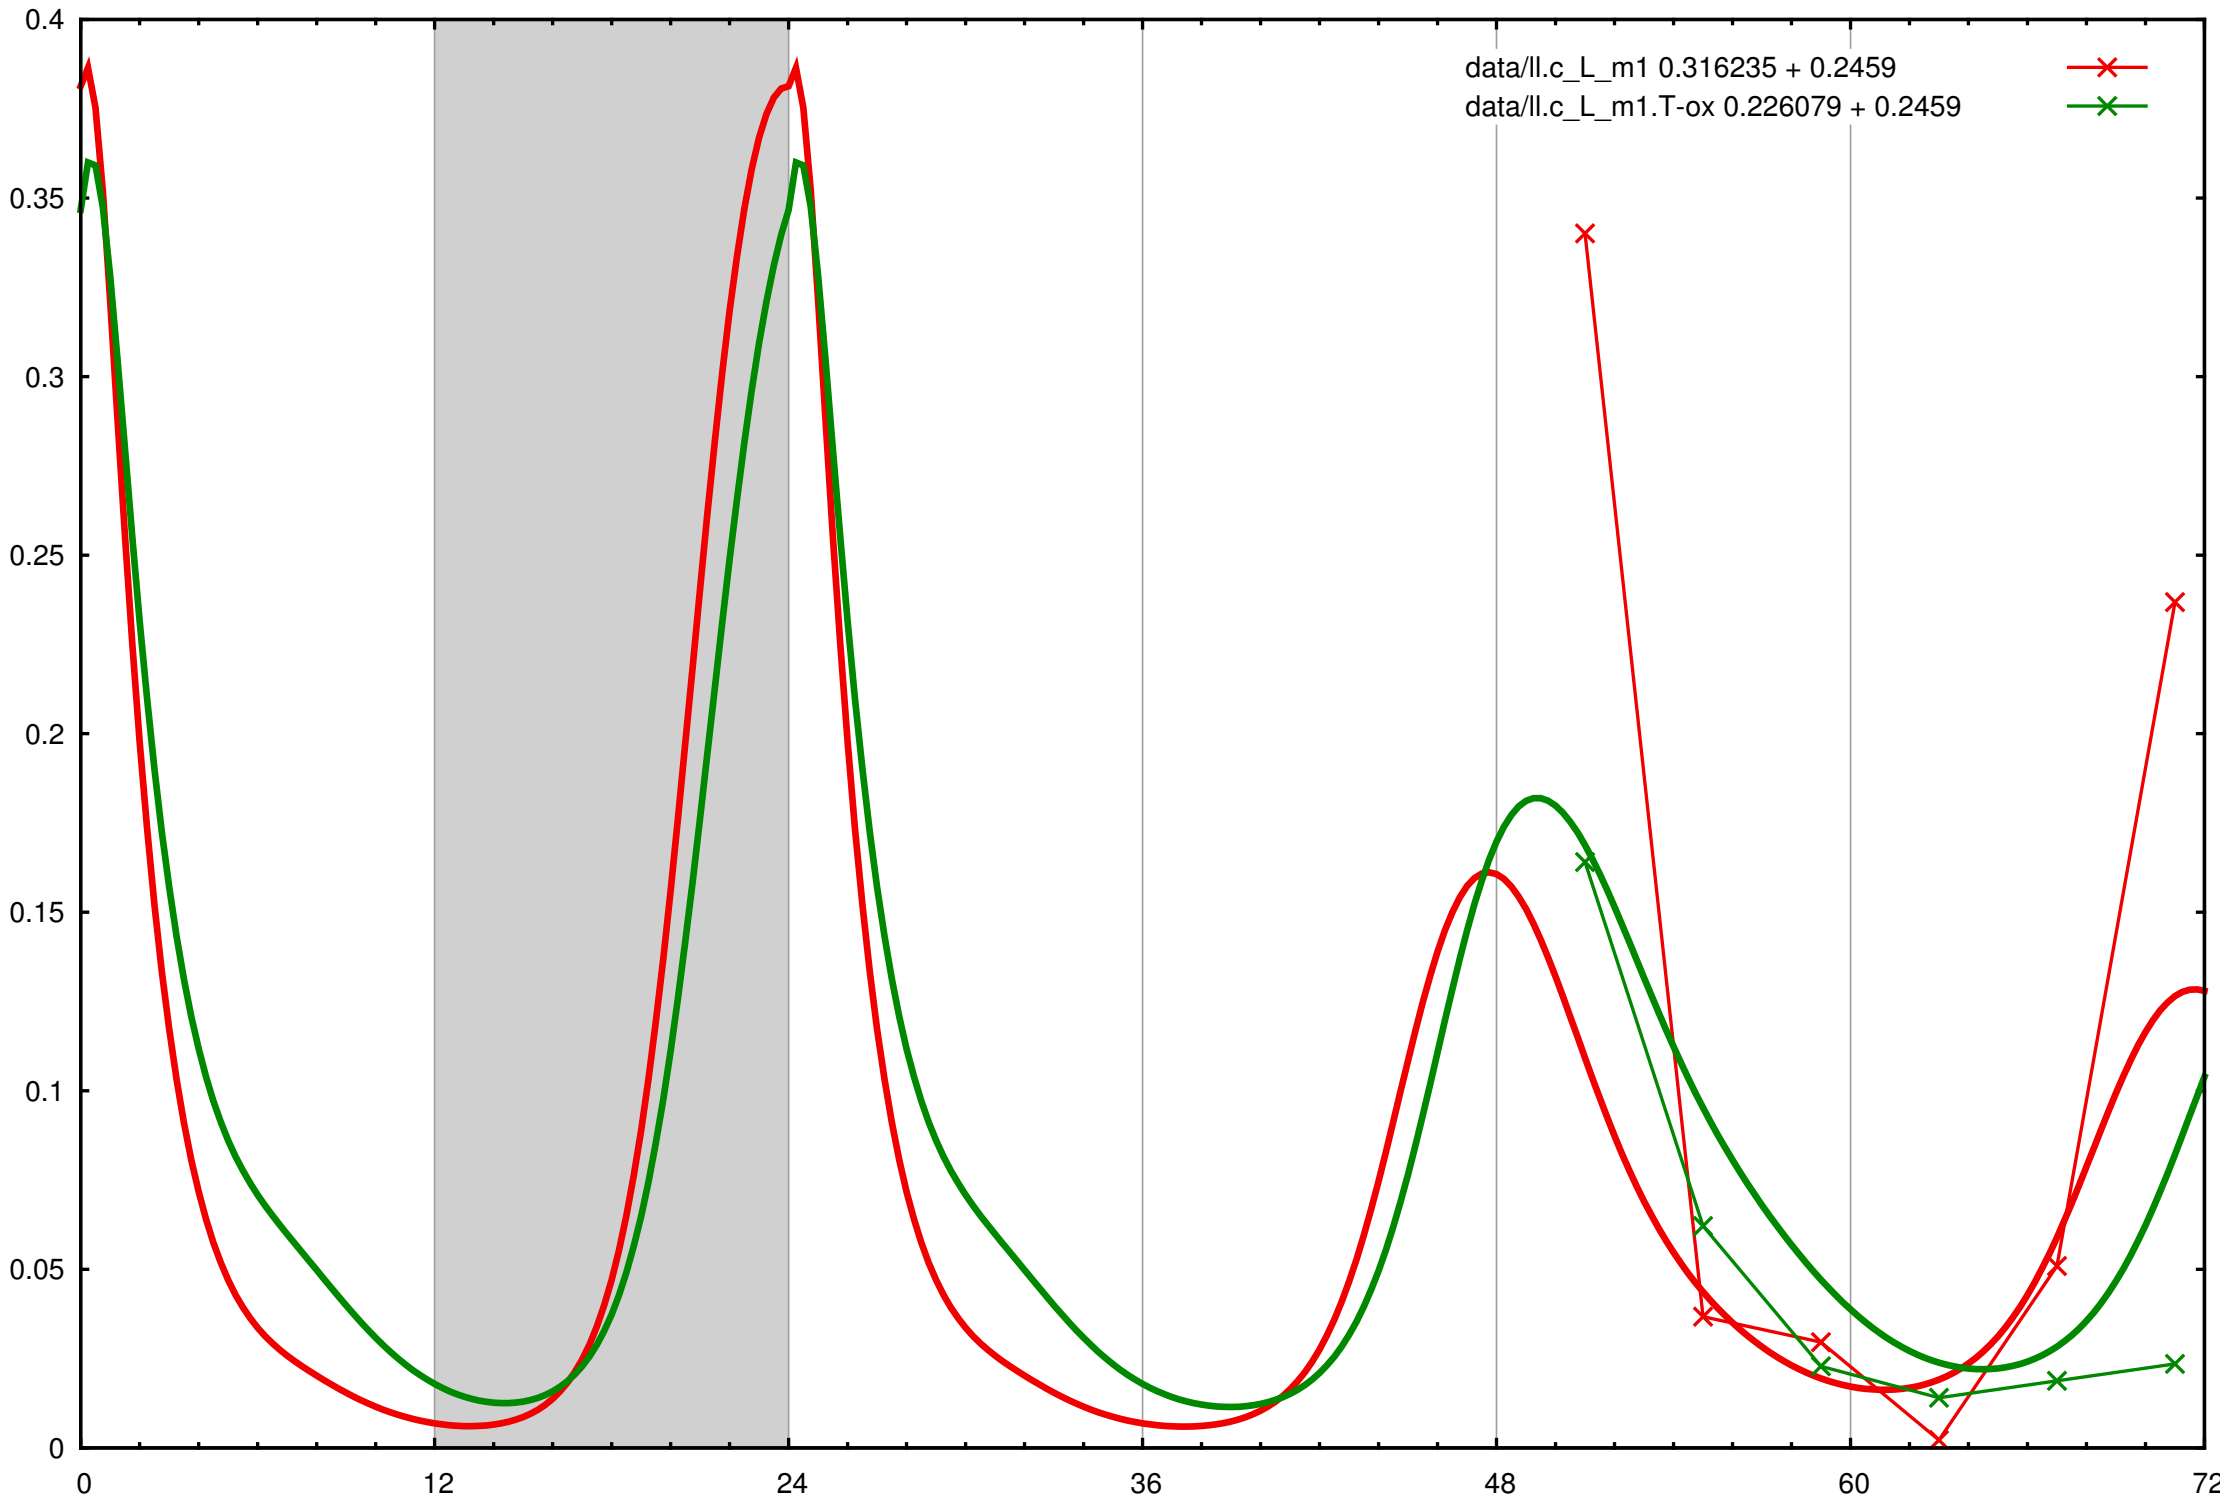

Scale group 128, scost 0.0370857

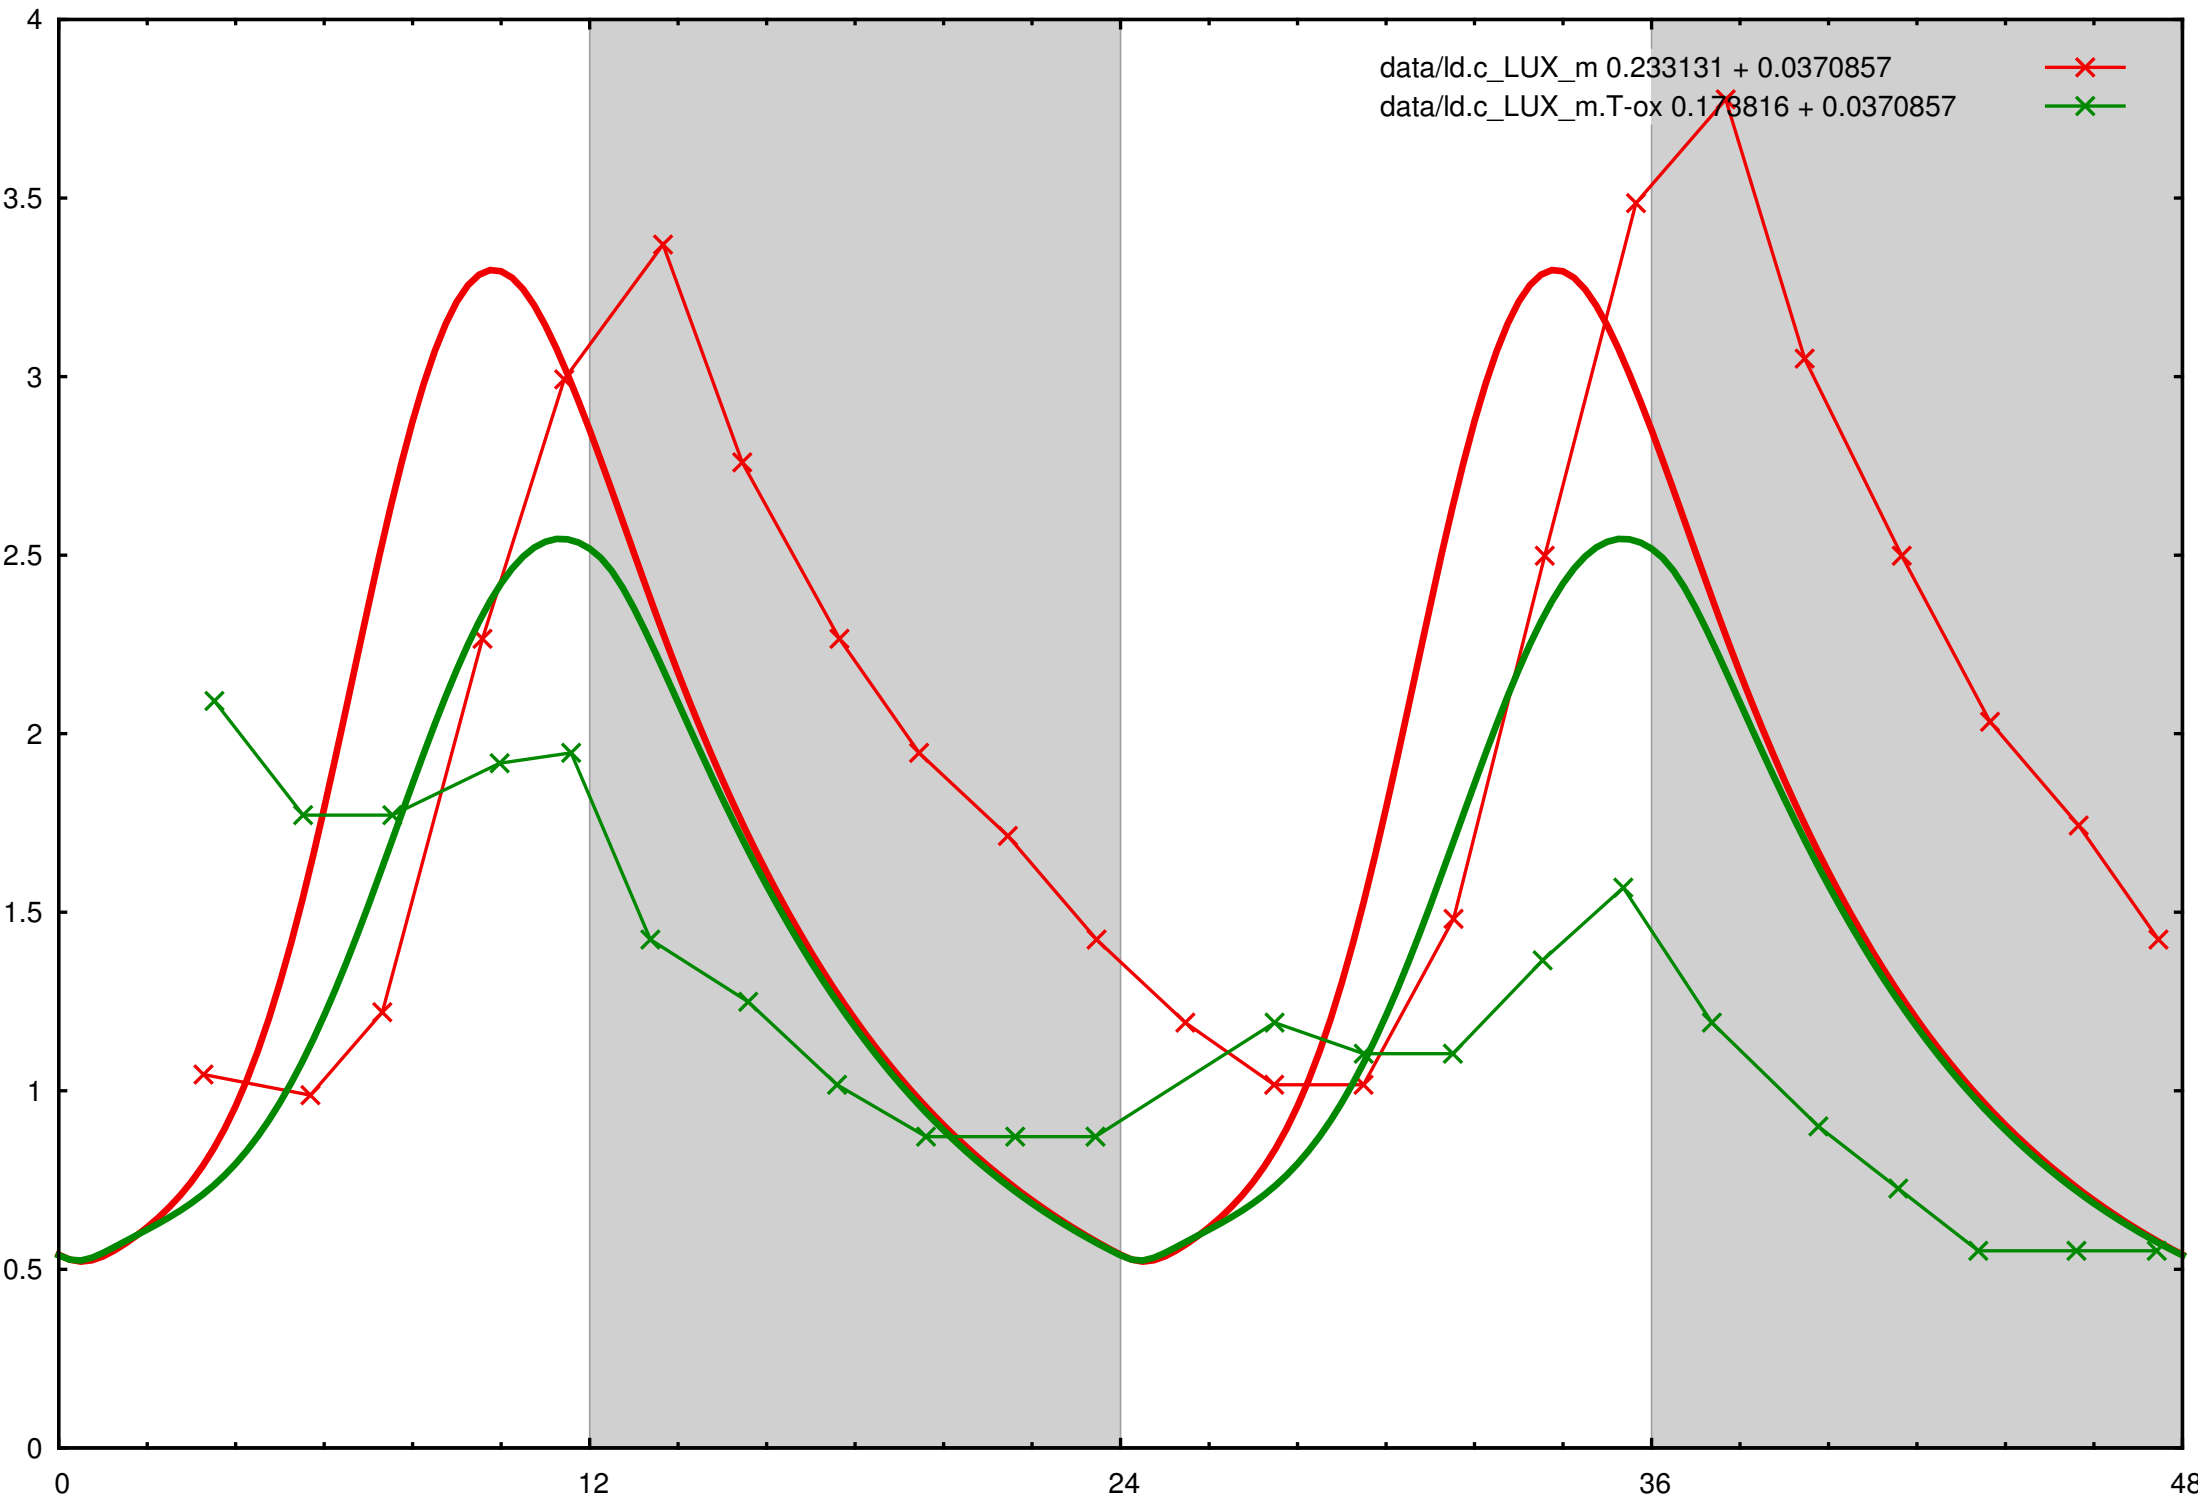



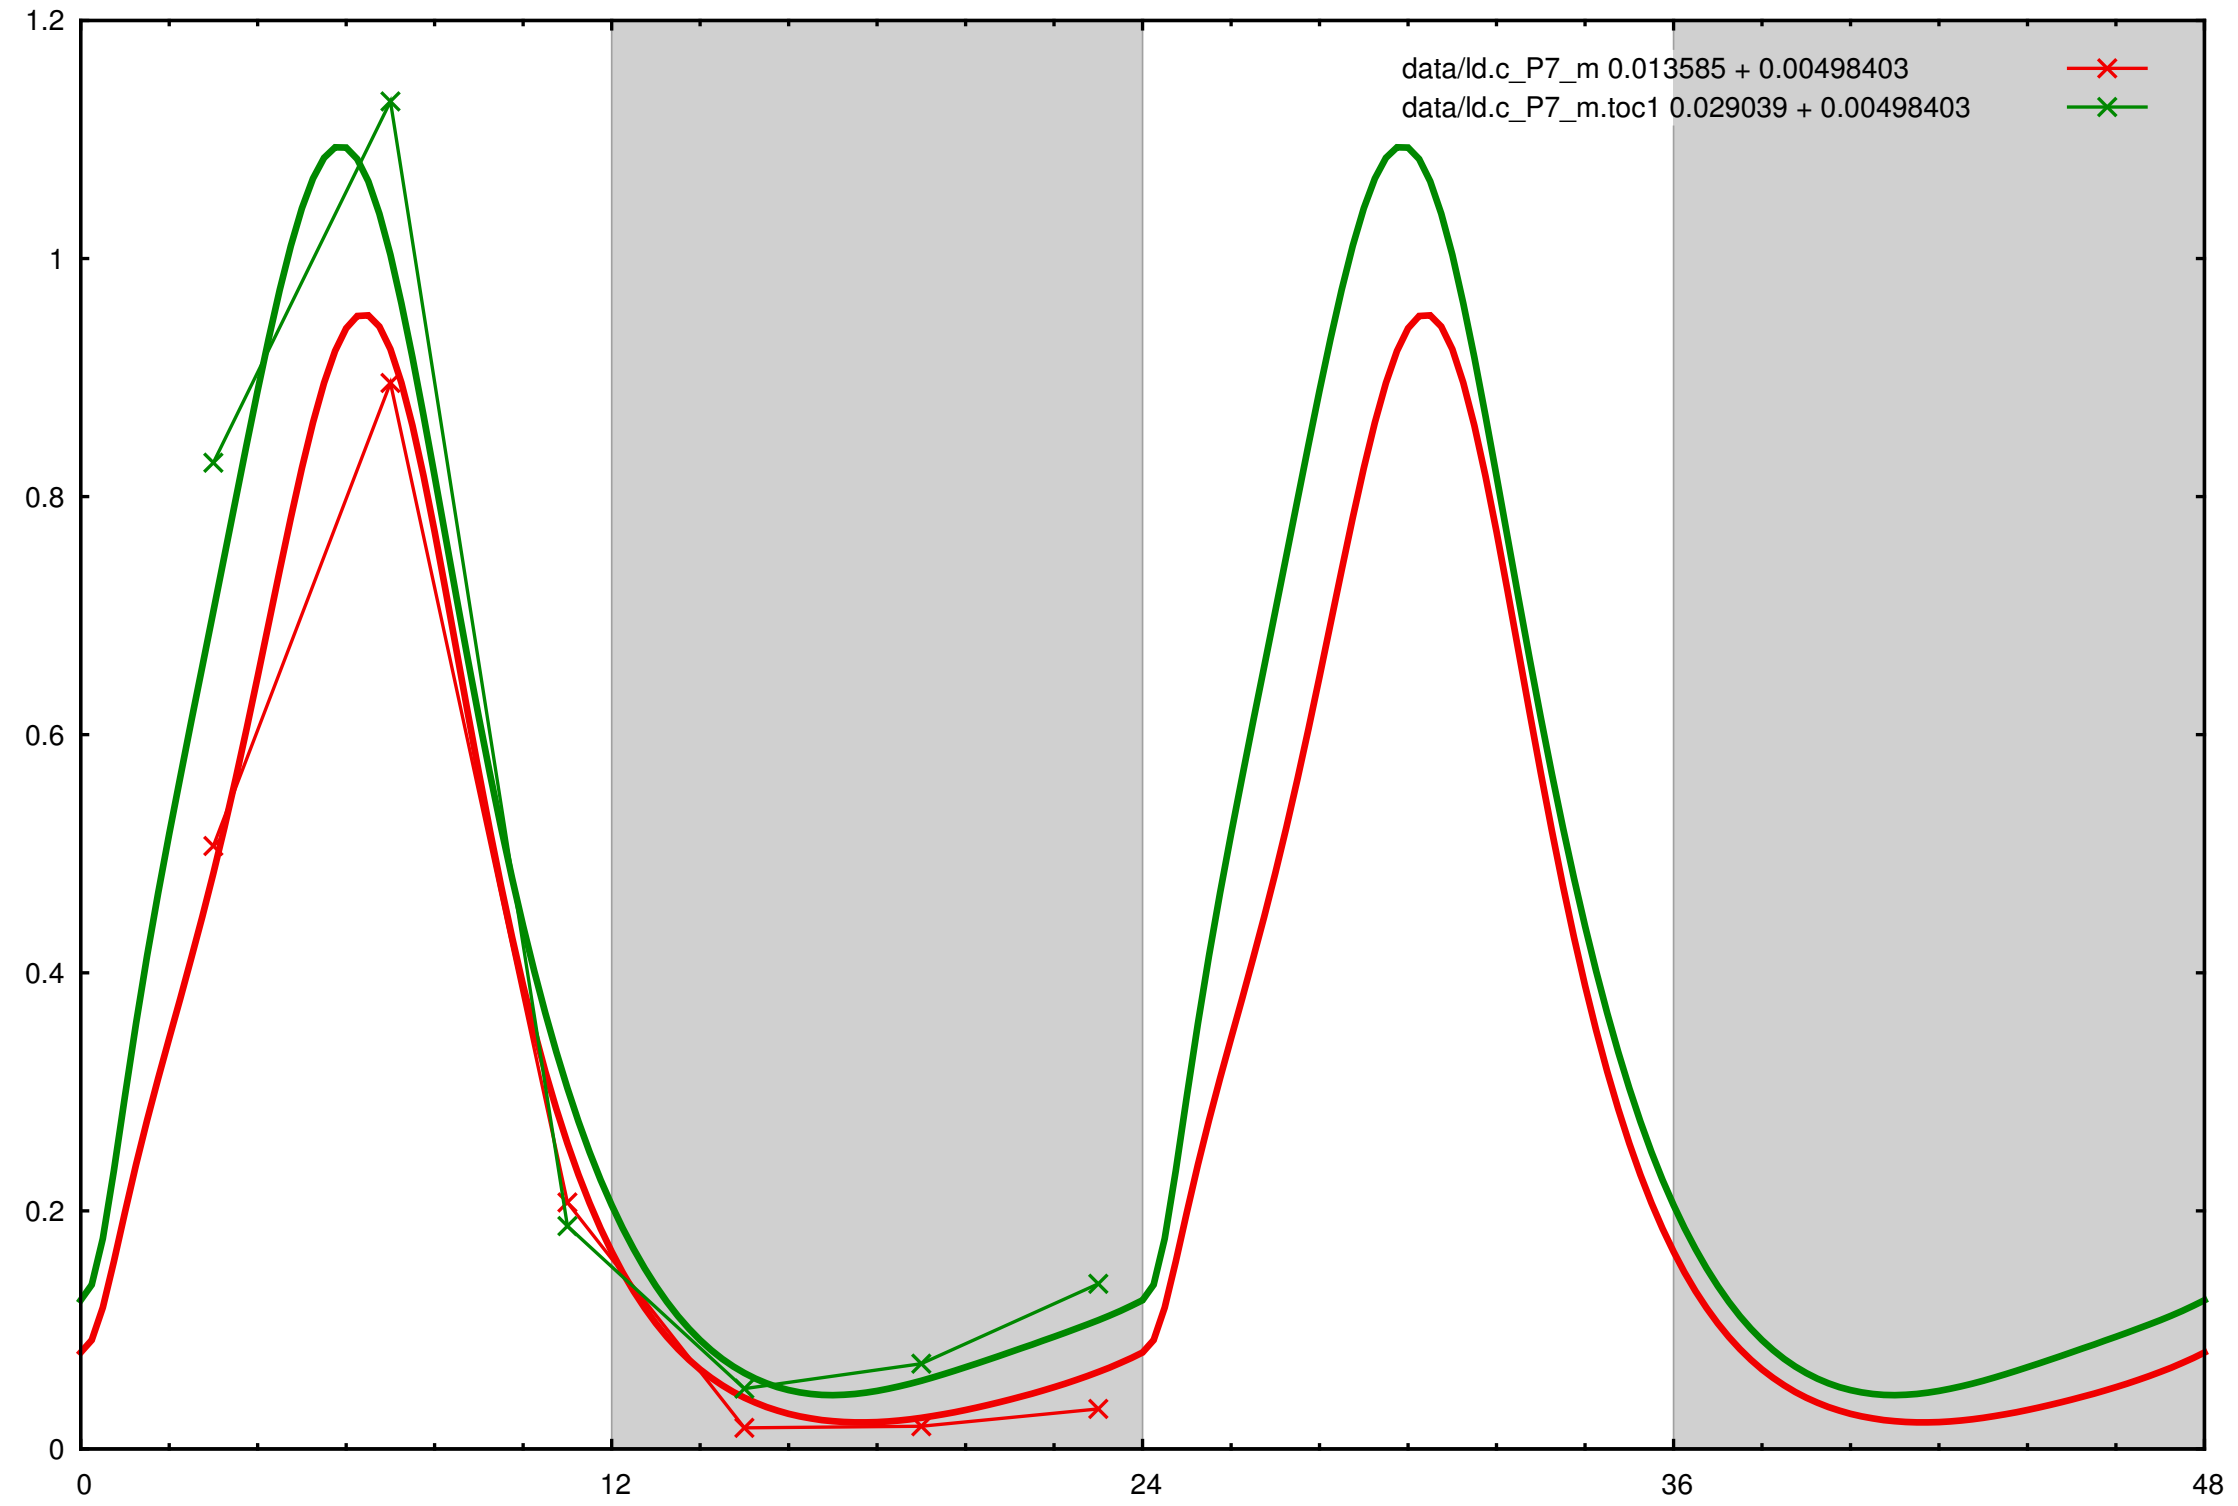

Scale group 130, scost 0.0229249

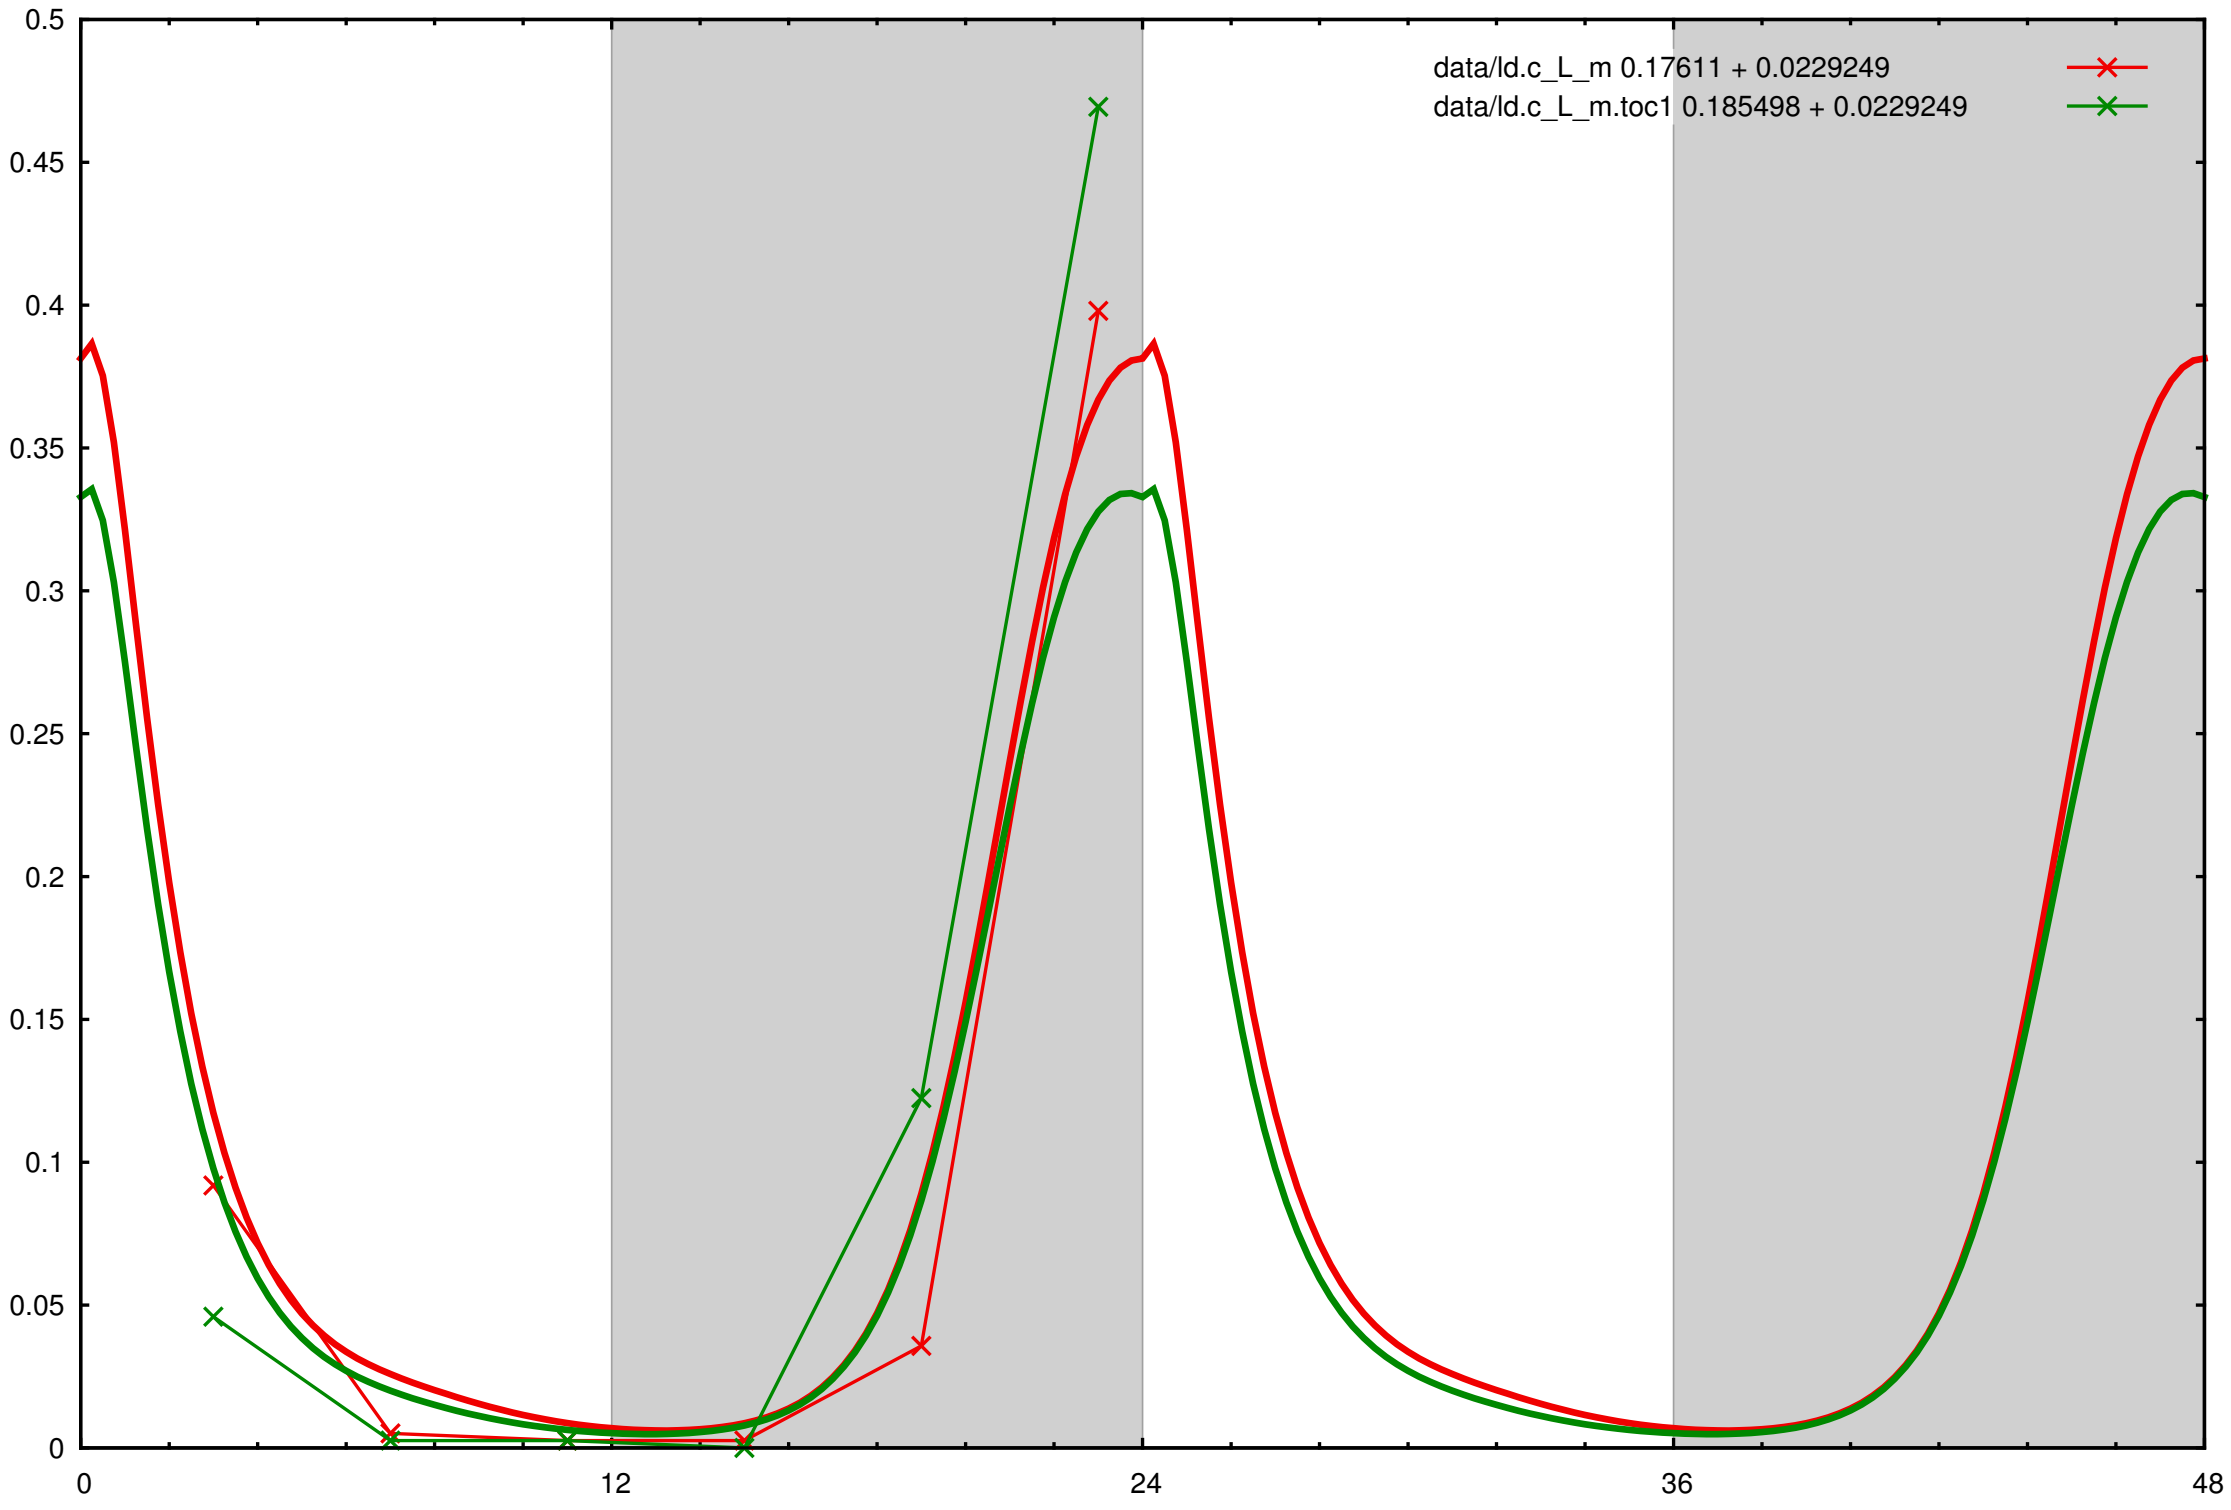

Scale group 131, scost 0.0851573

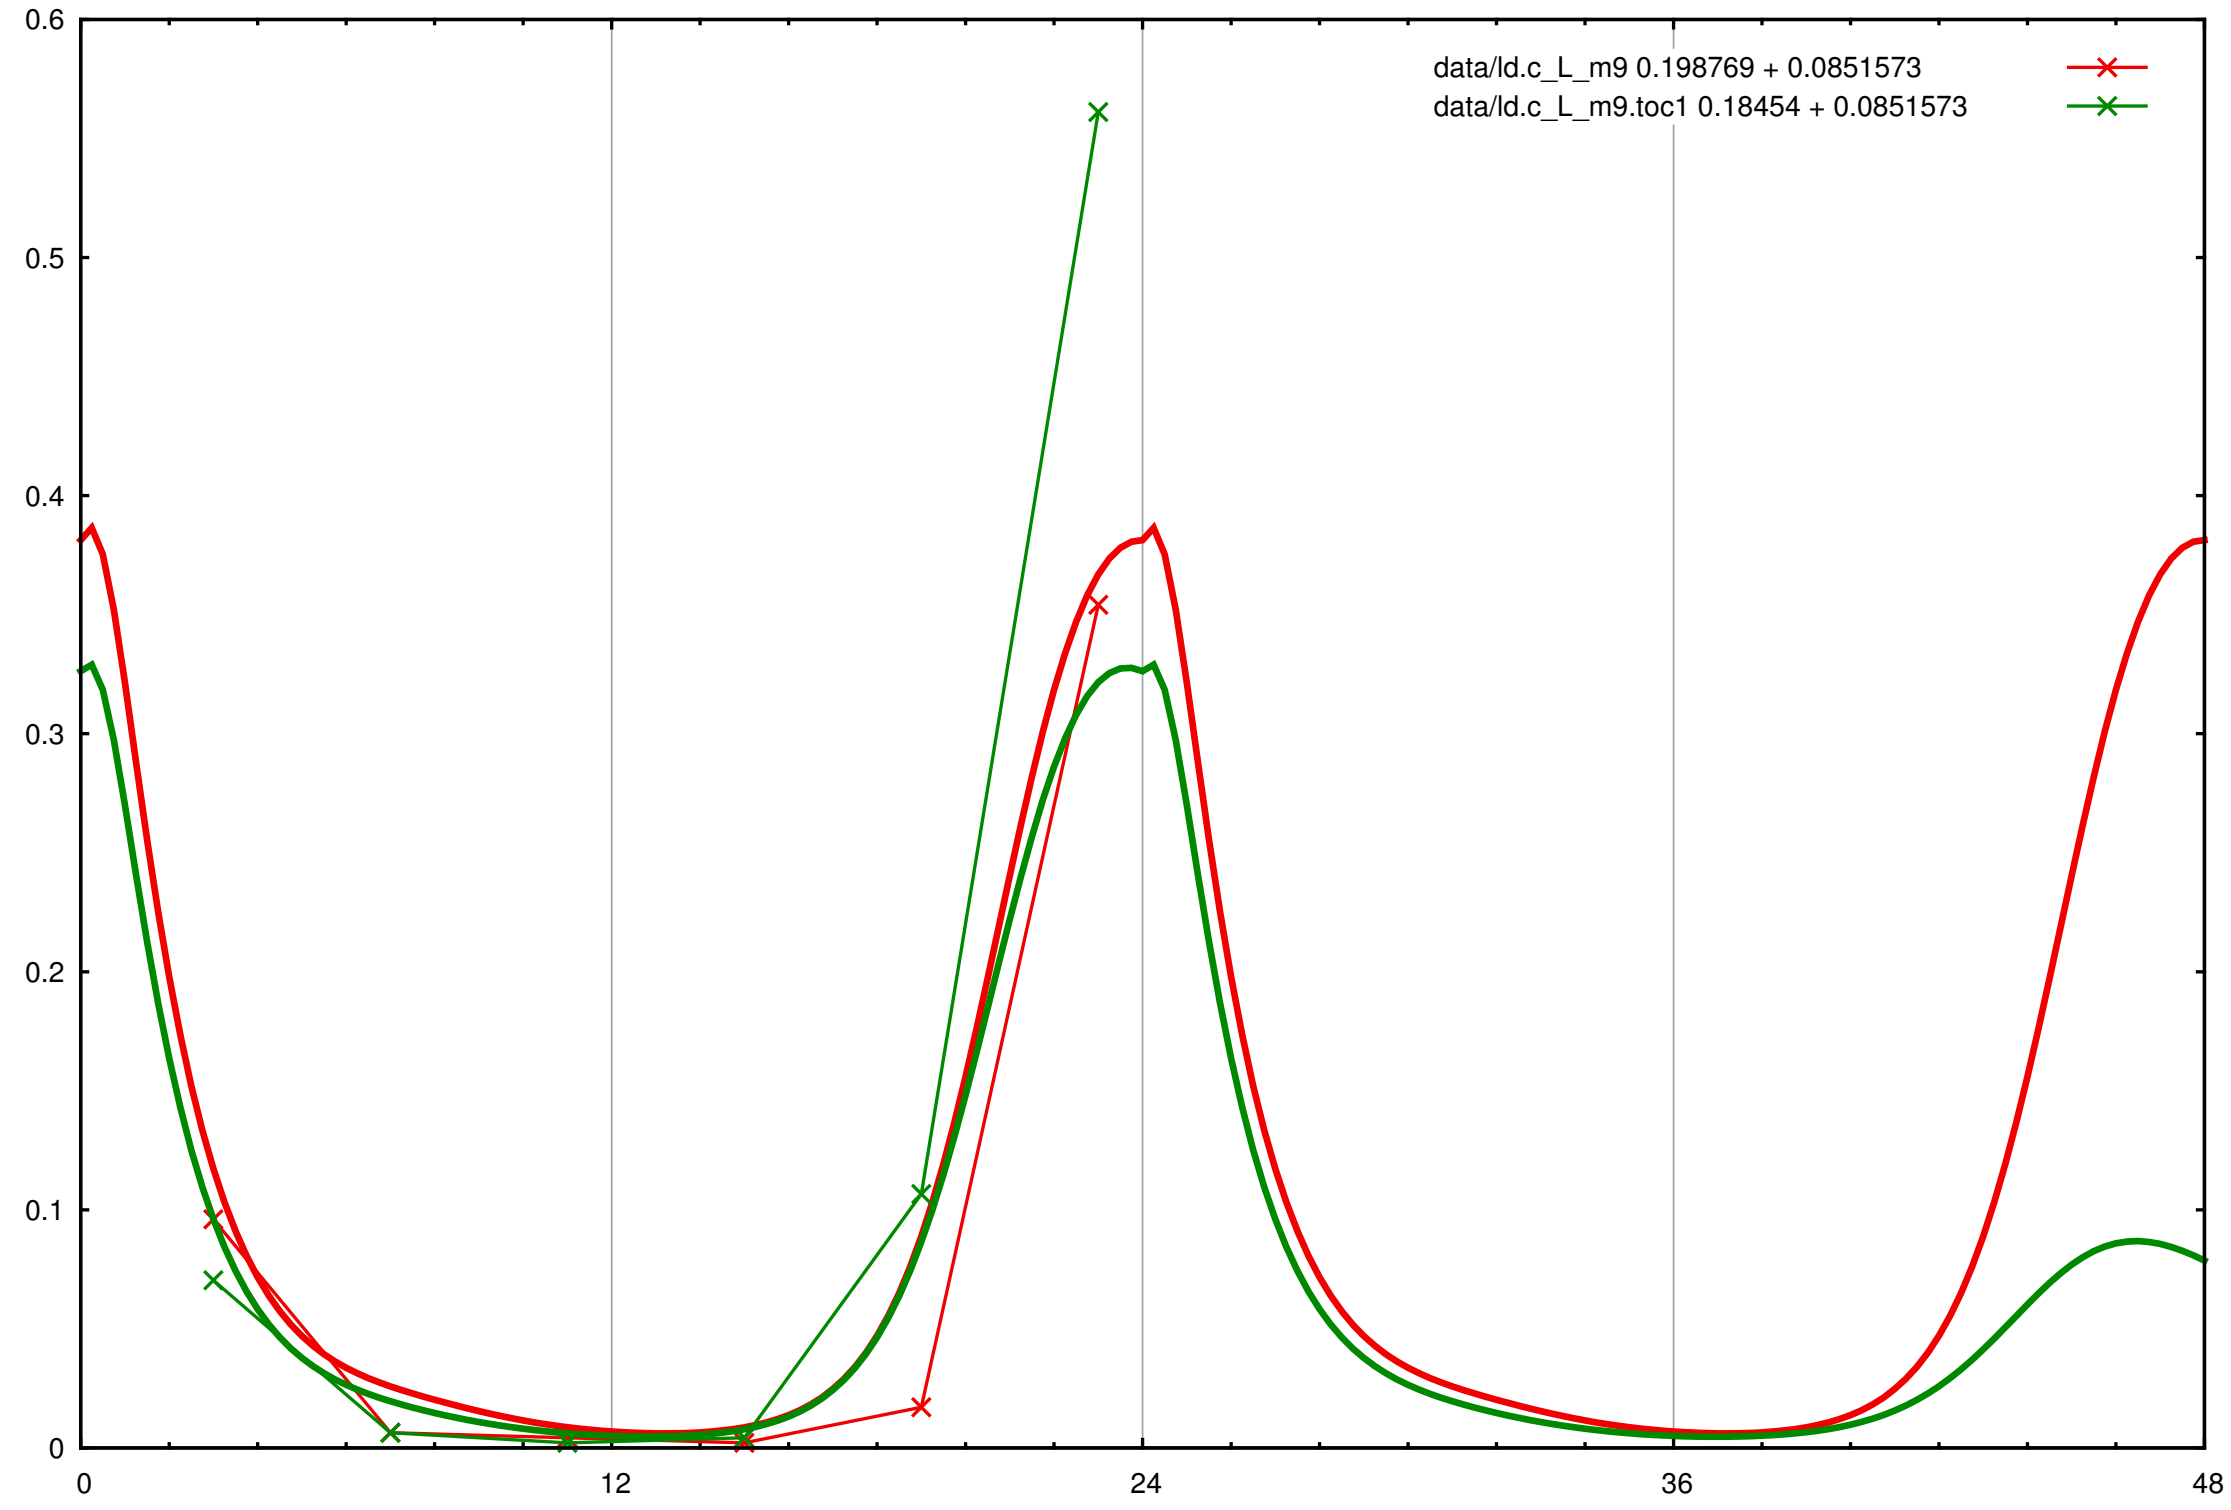

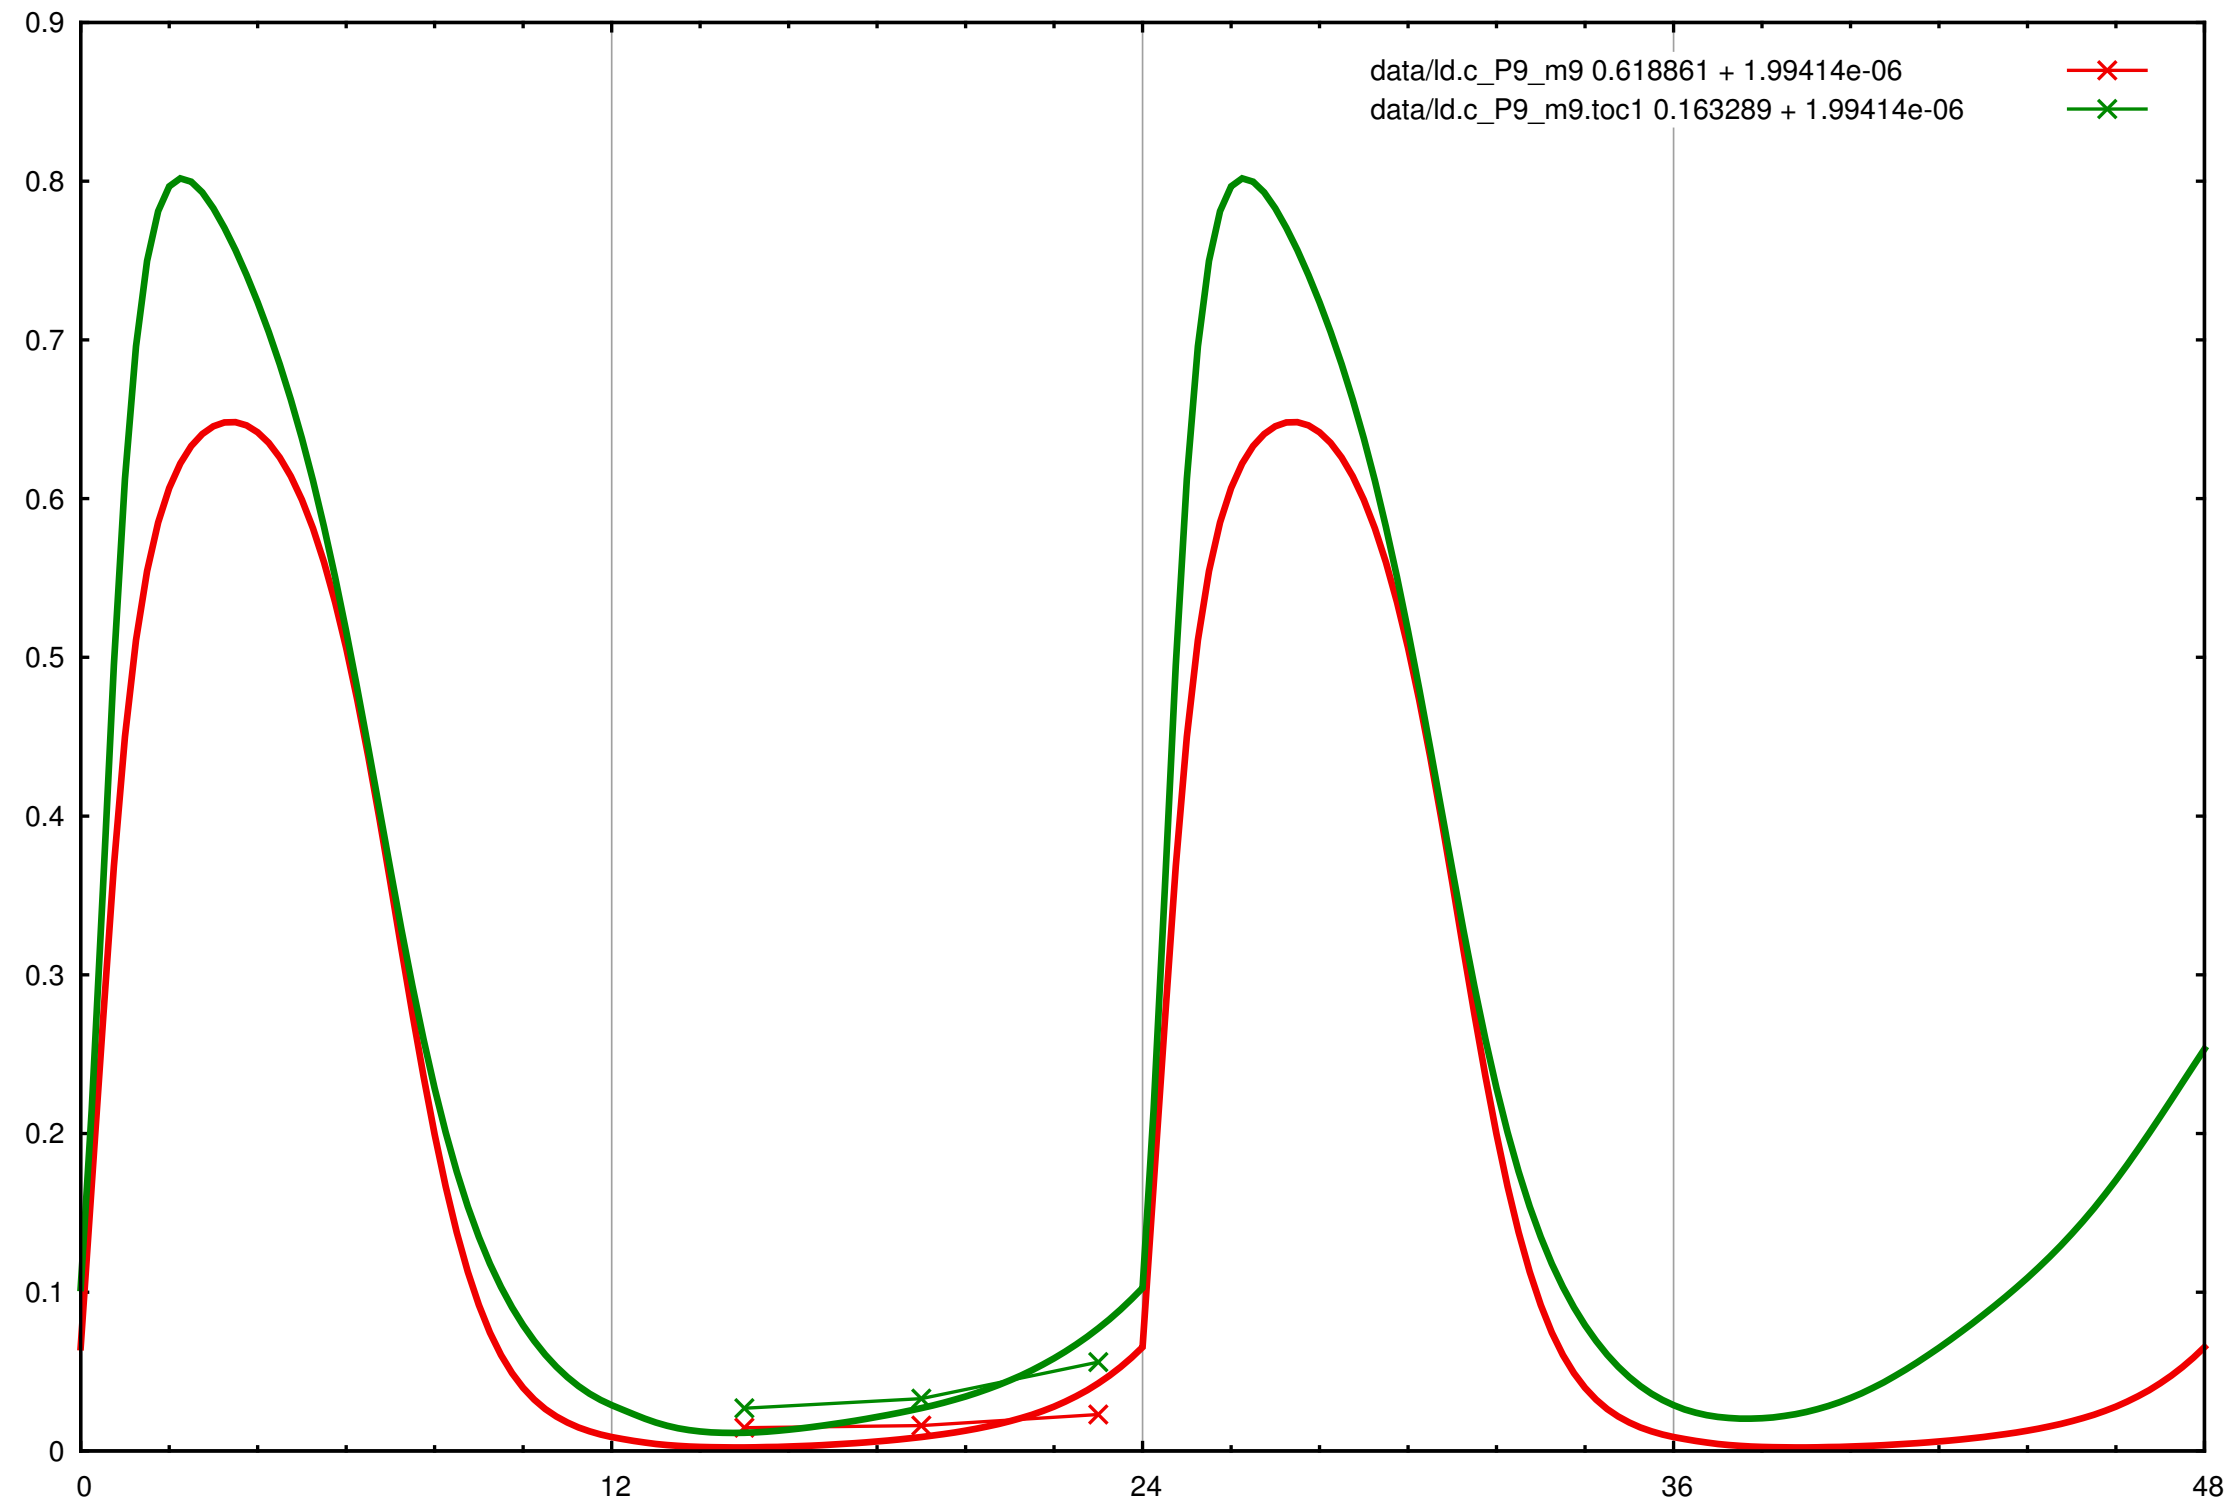

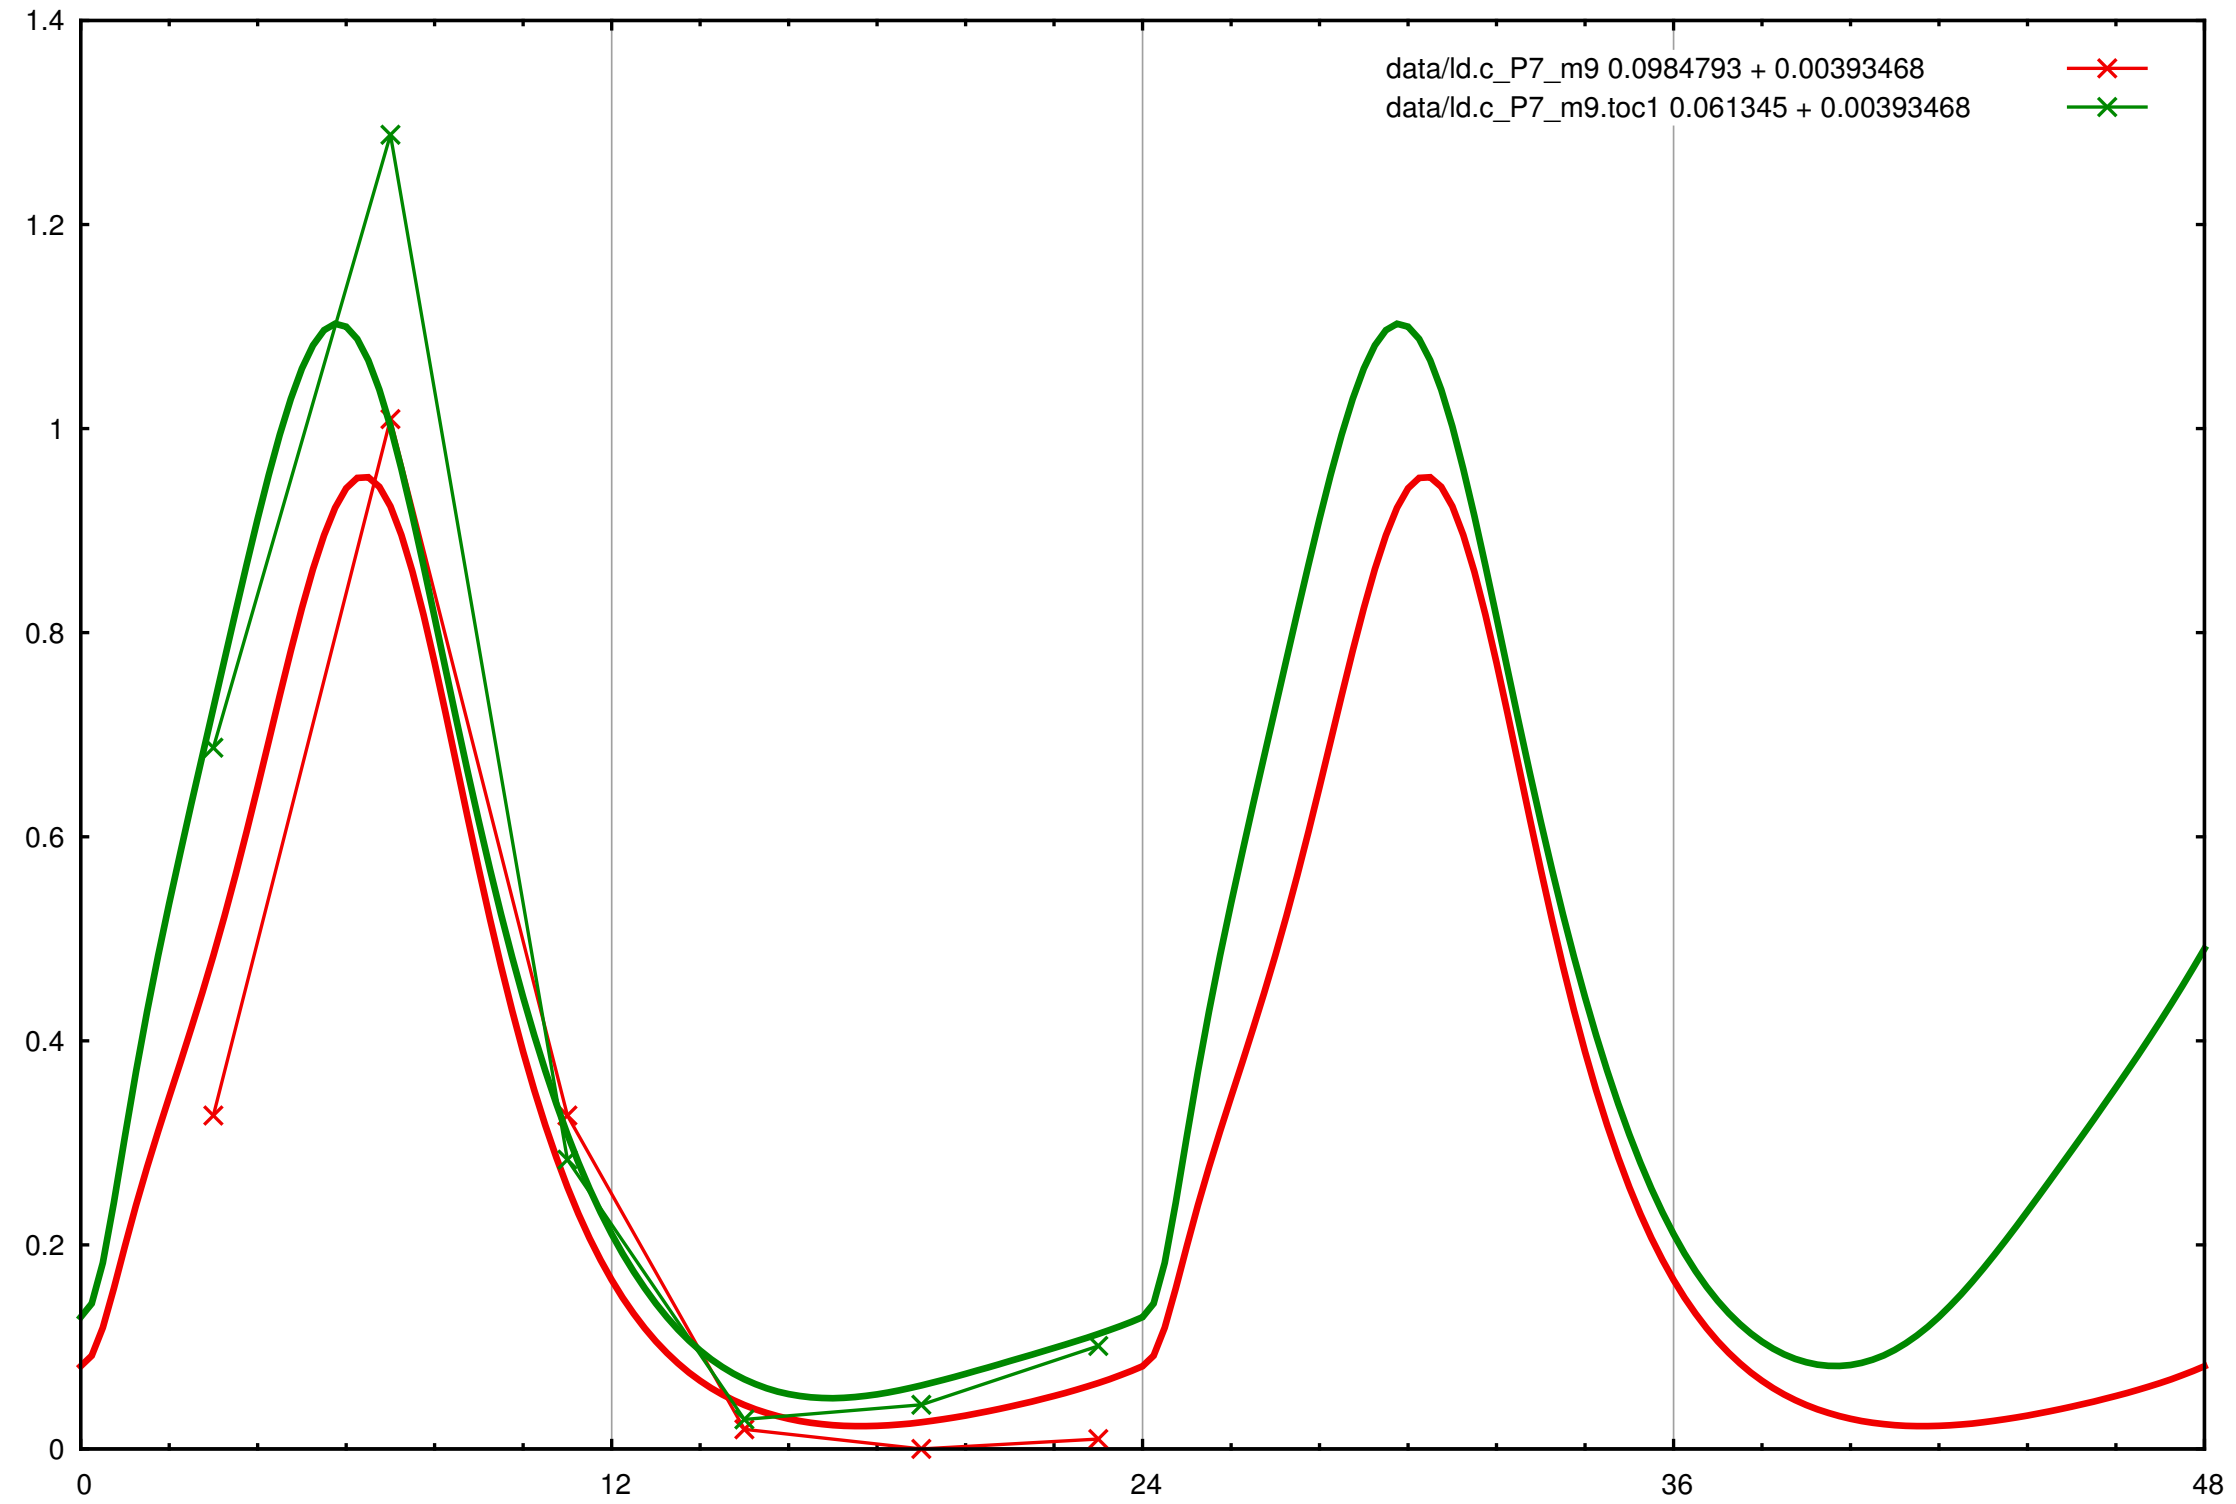

Scale group 134, scost 0.184465

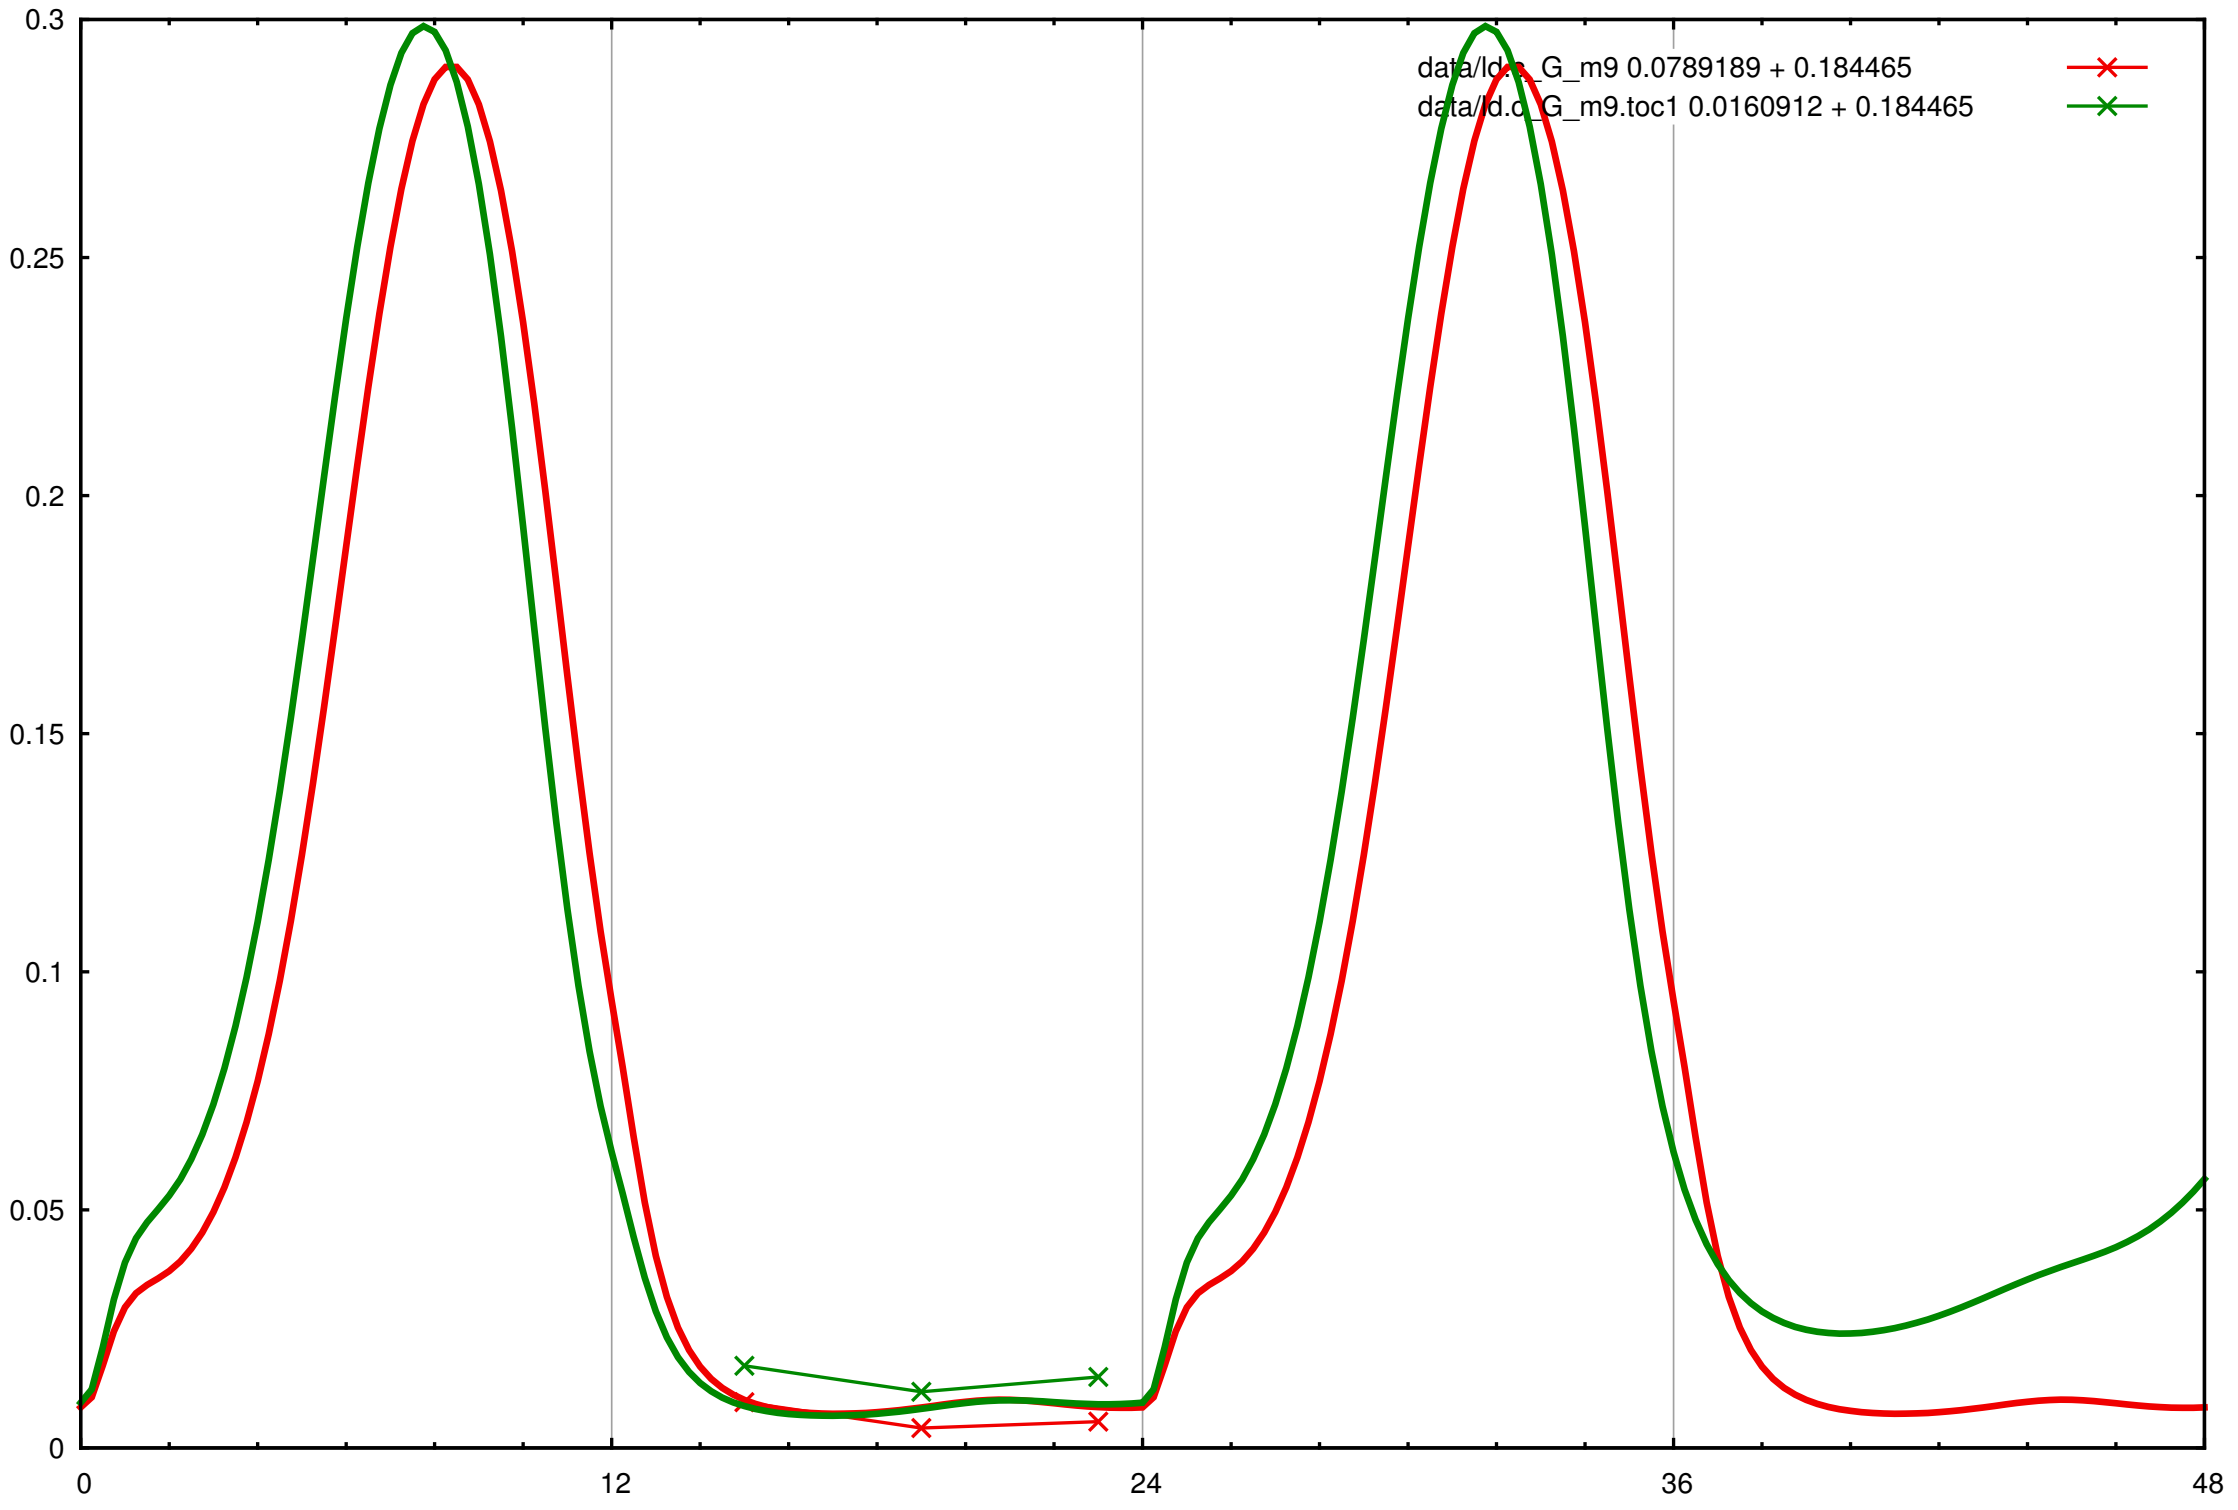

Scale group 135, scost 1.15626

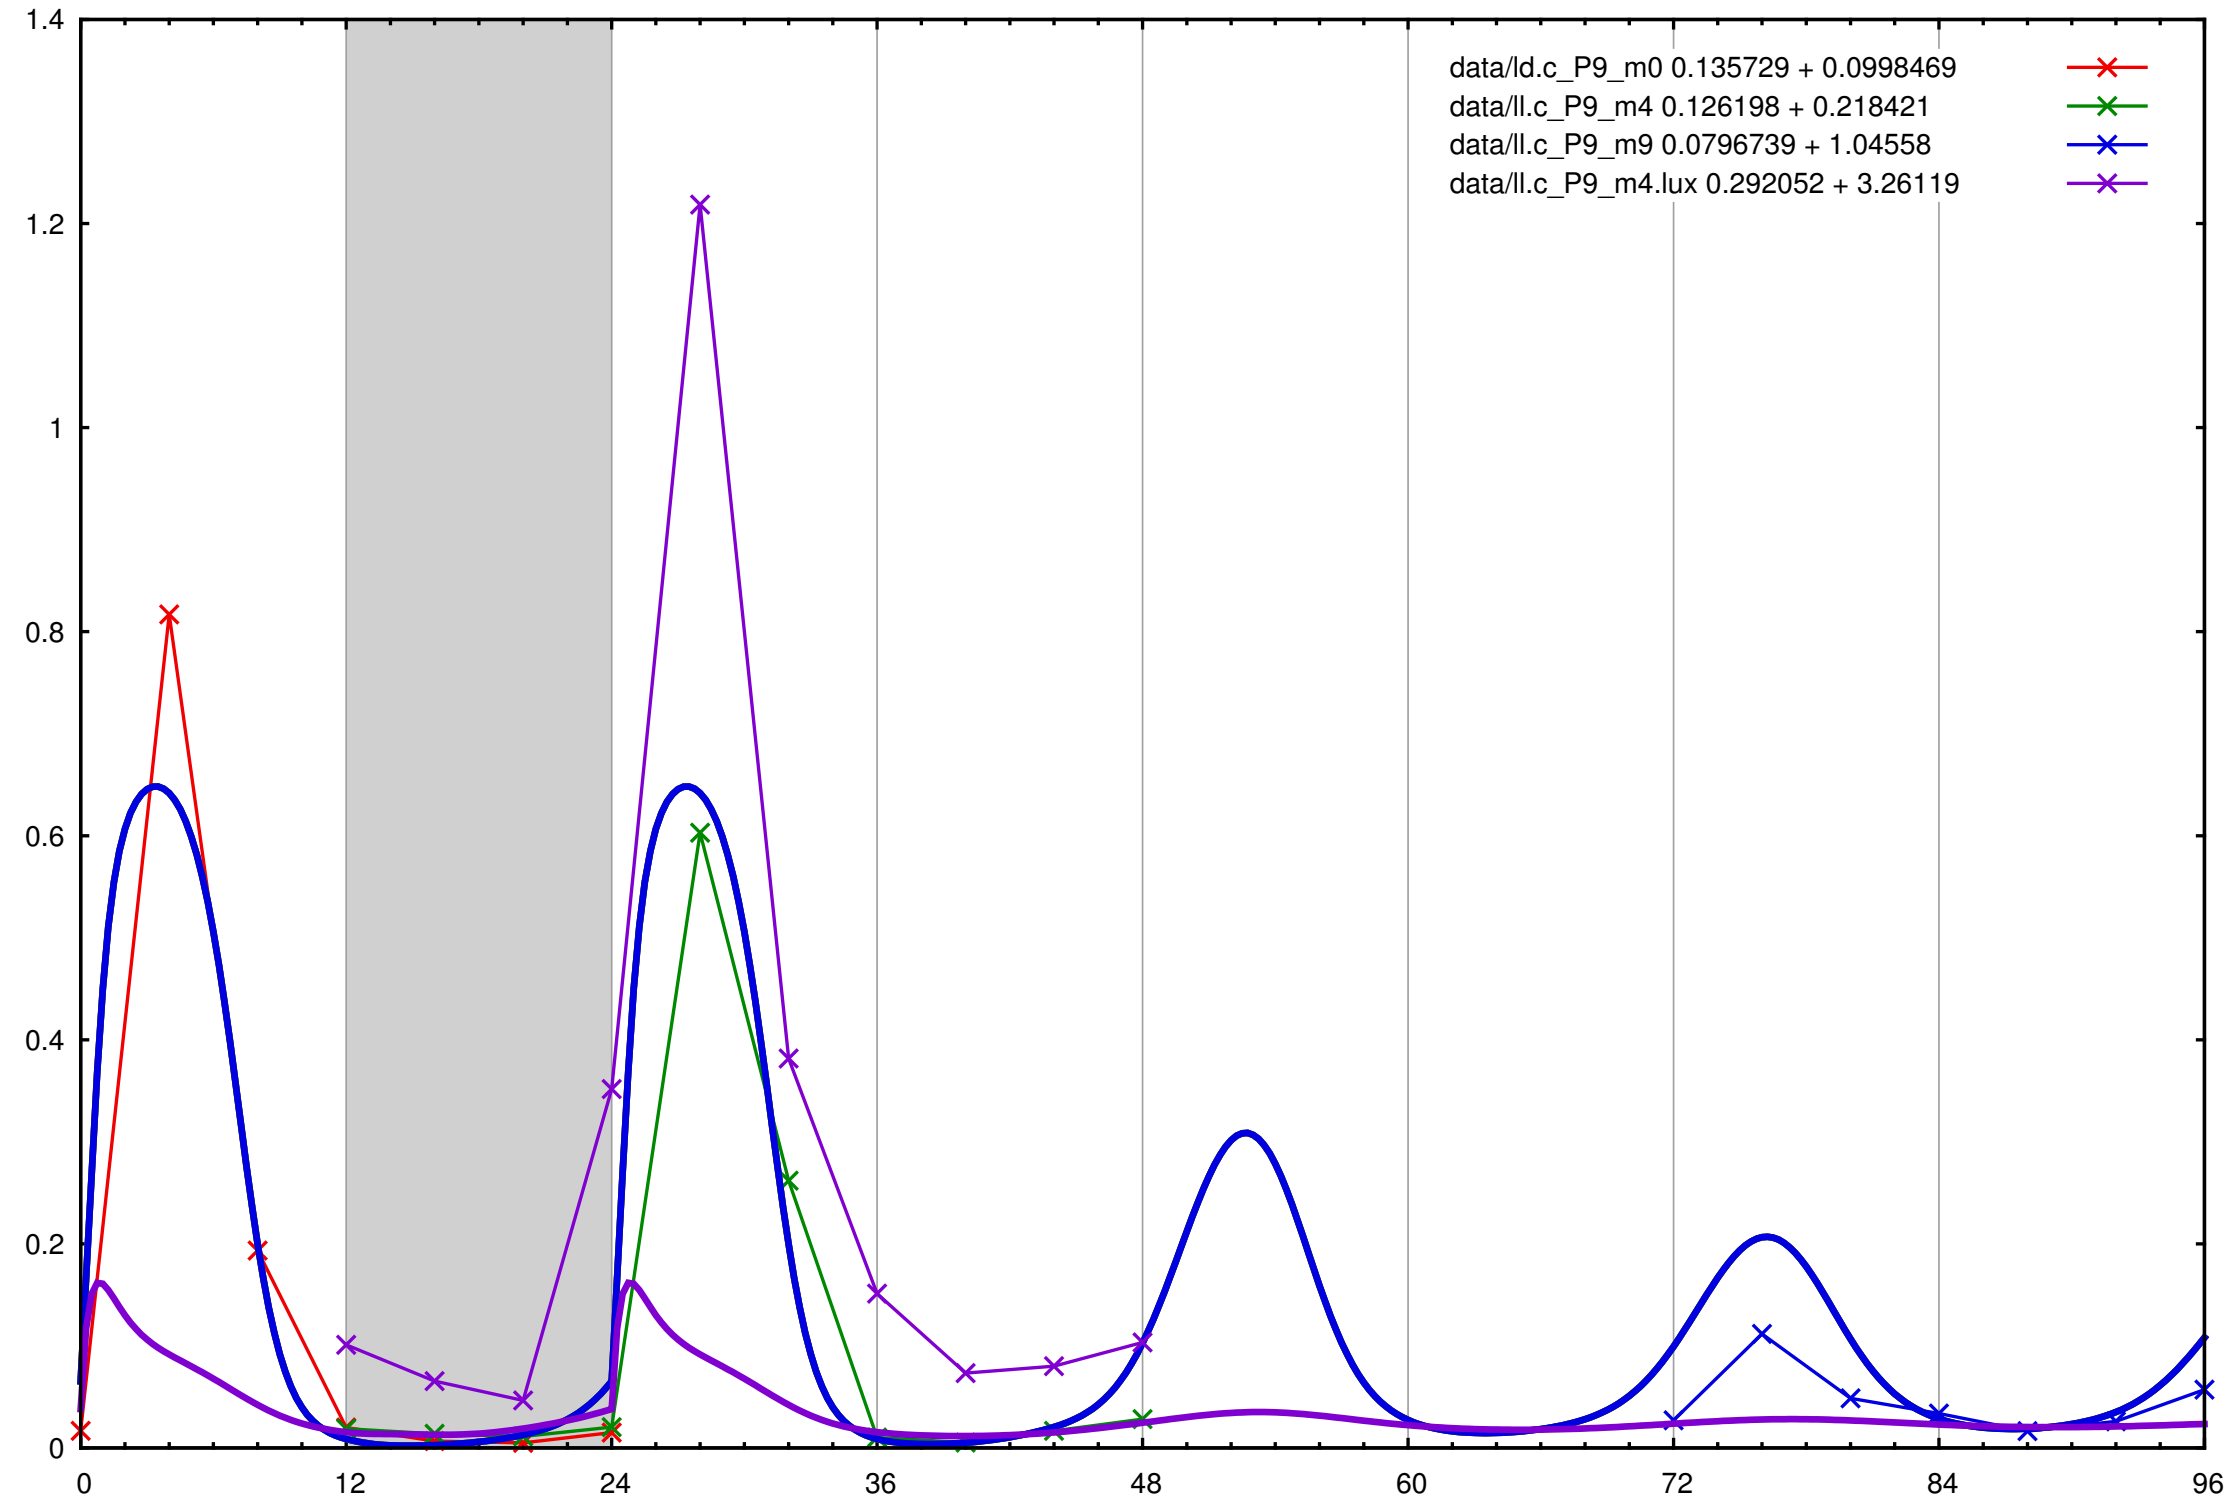

Scale group 136, scost 0.0138535

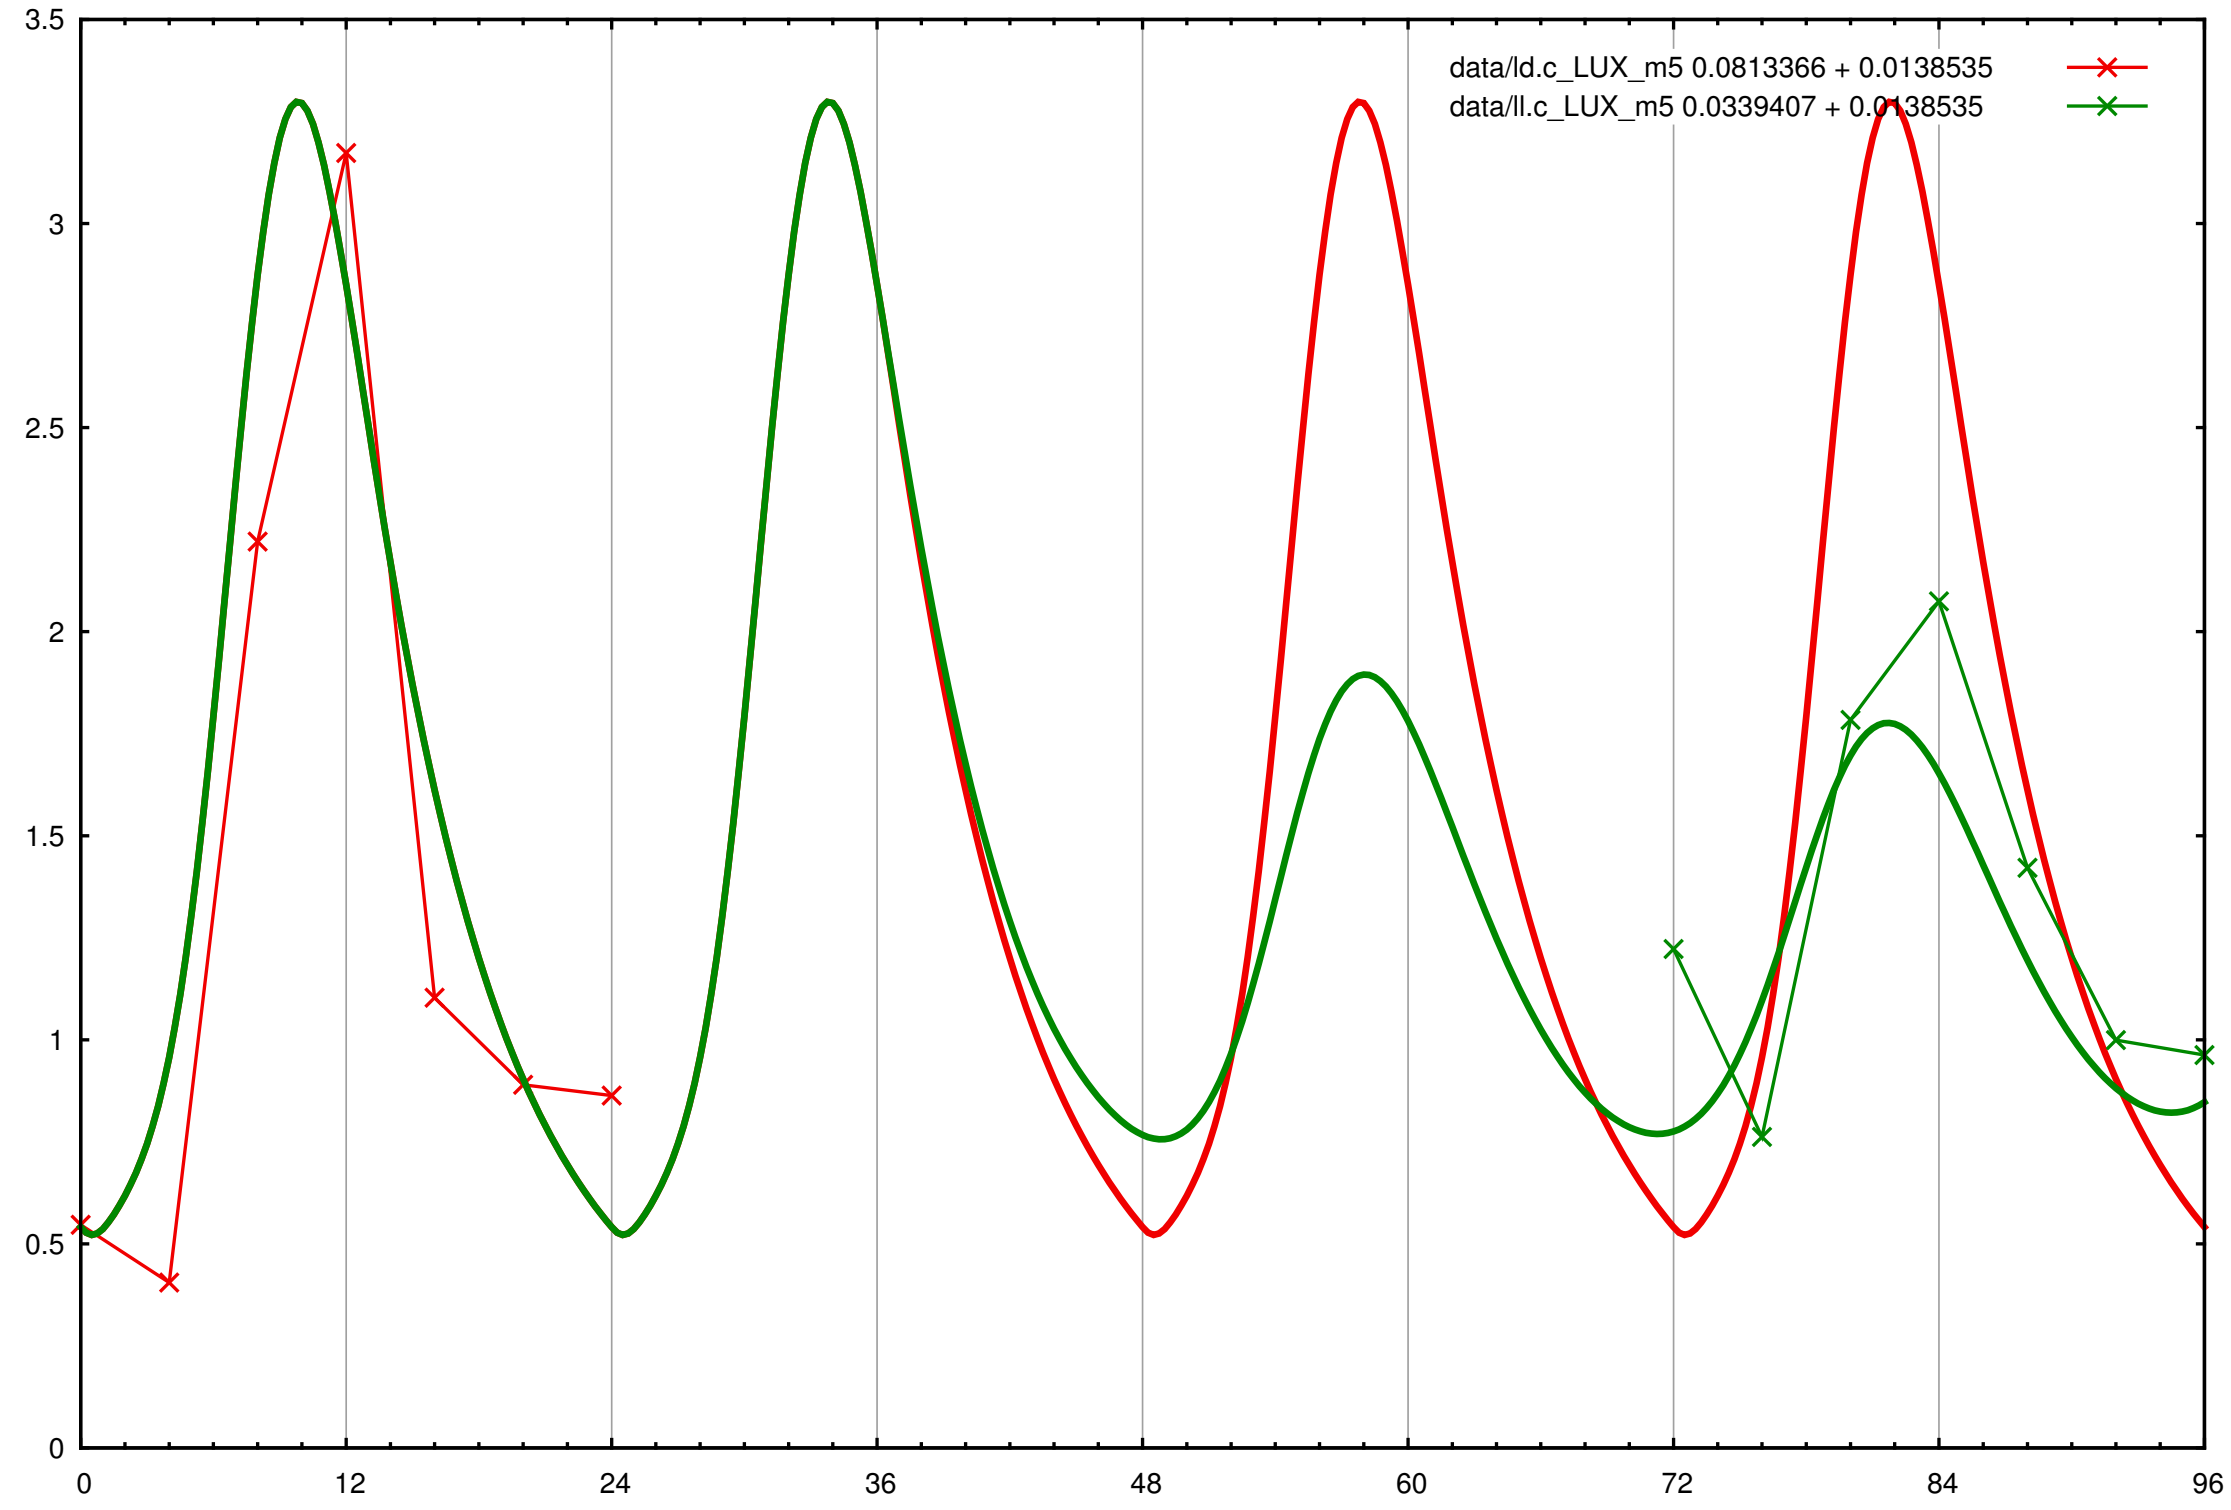



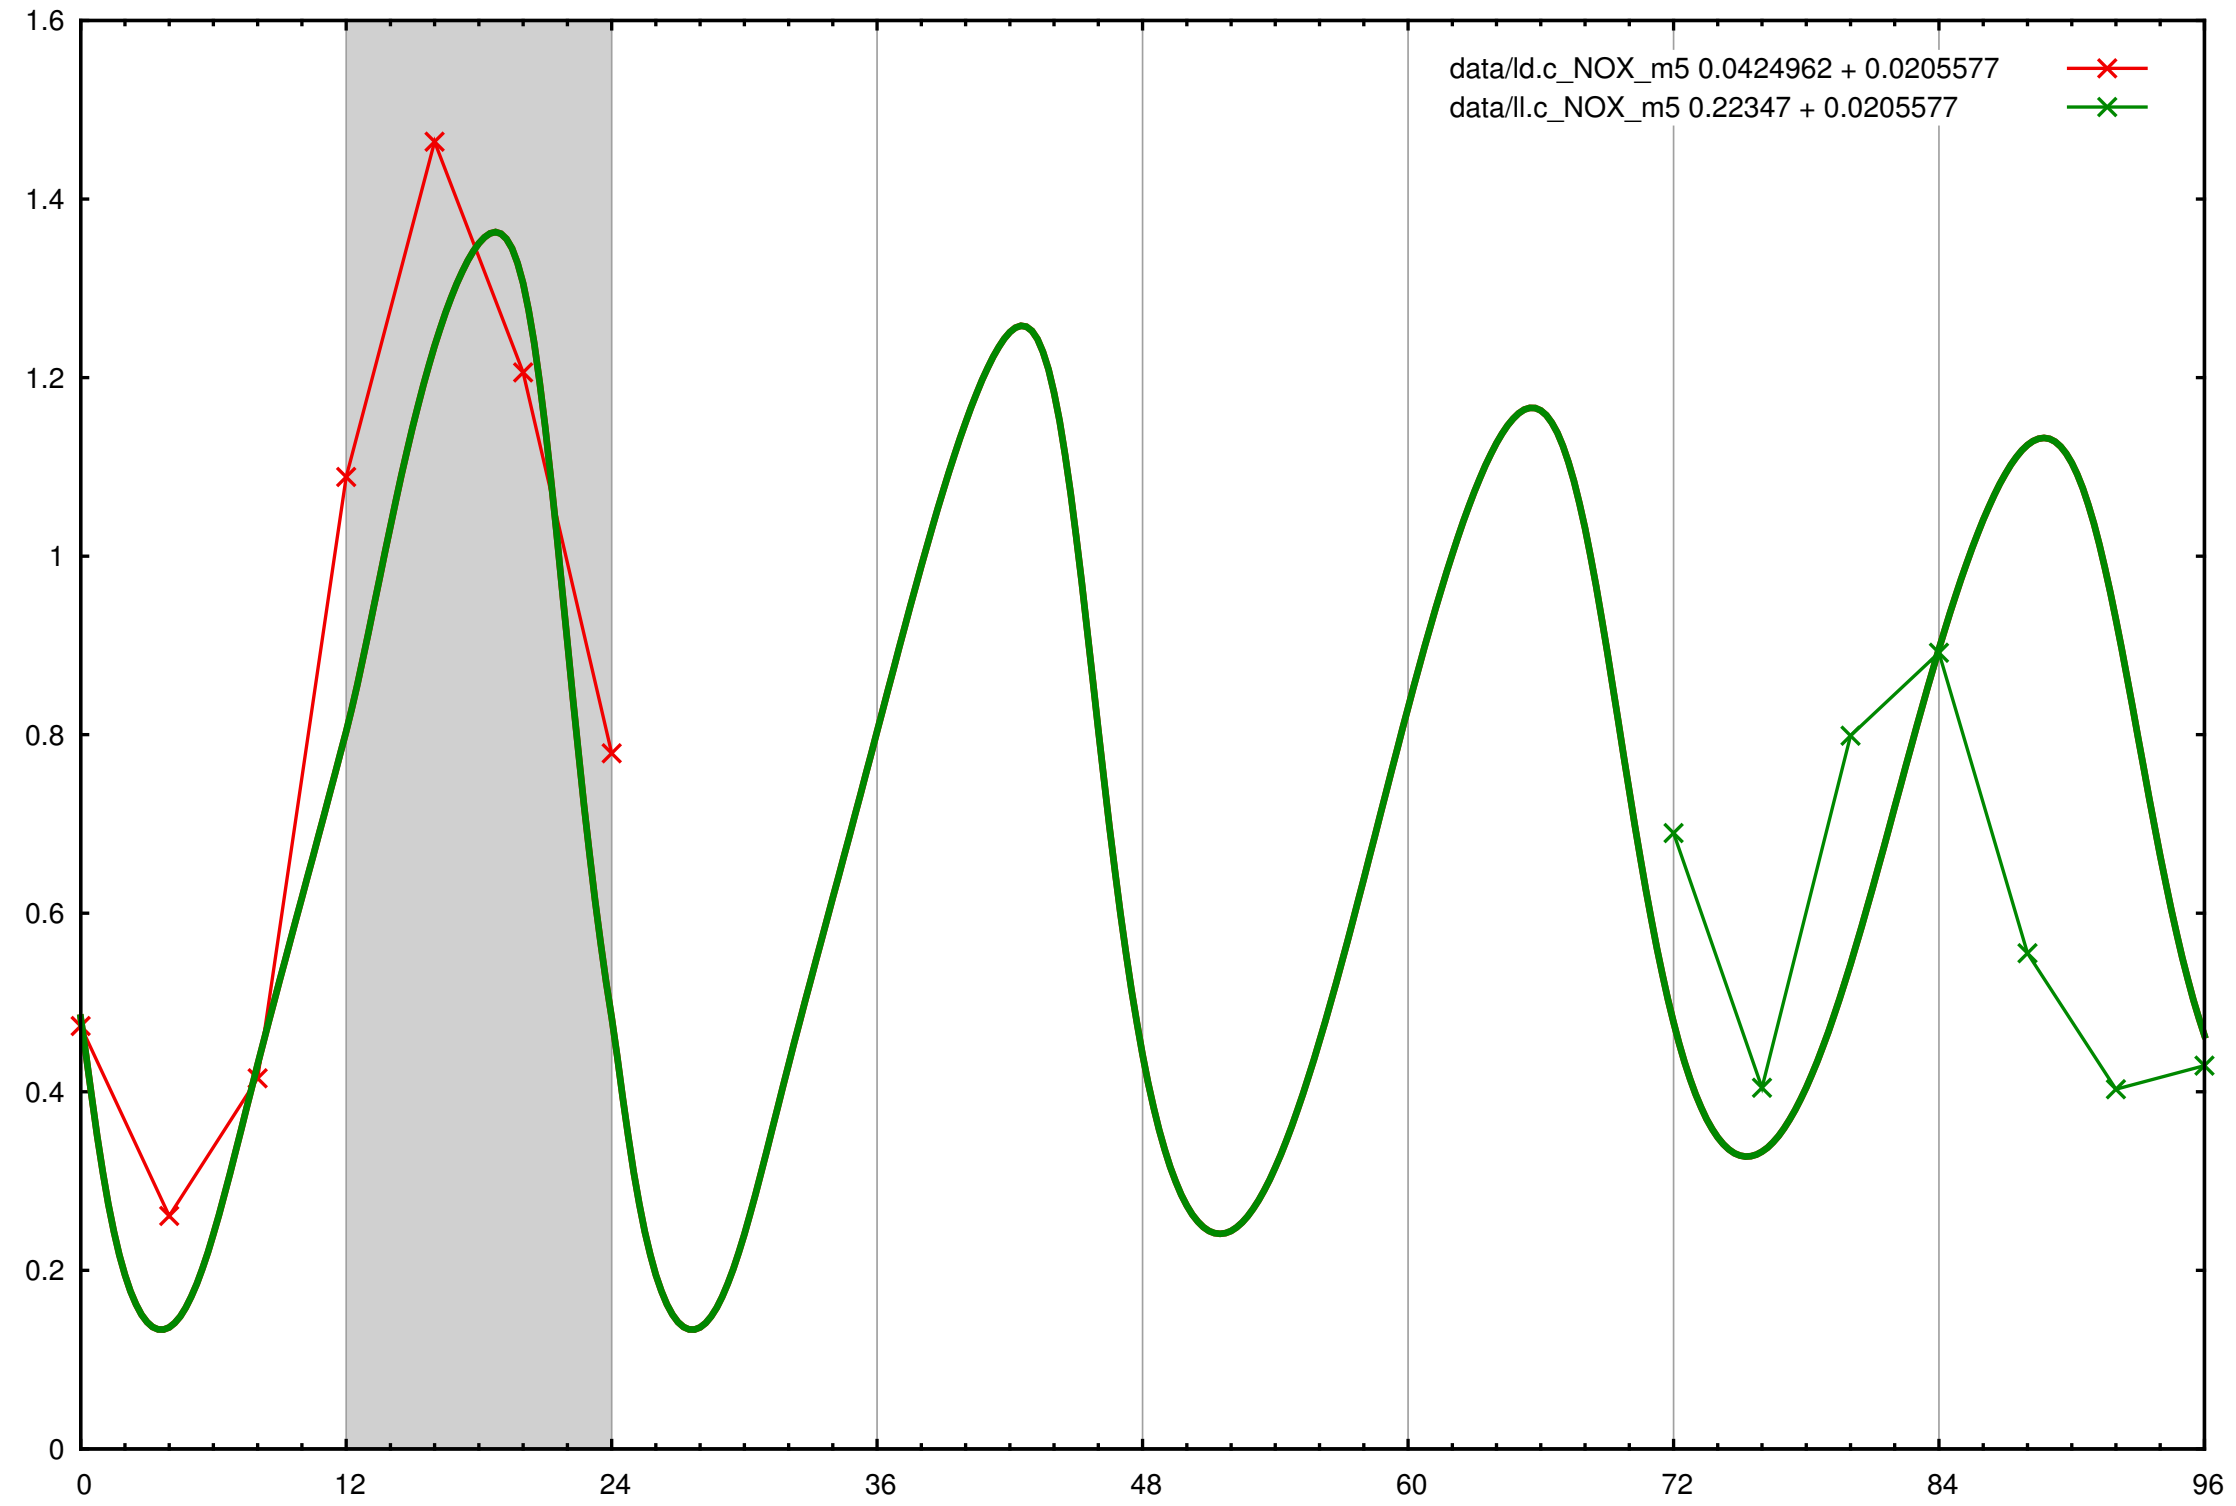

Scale group 138, scost 0.0318656

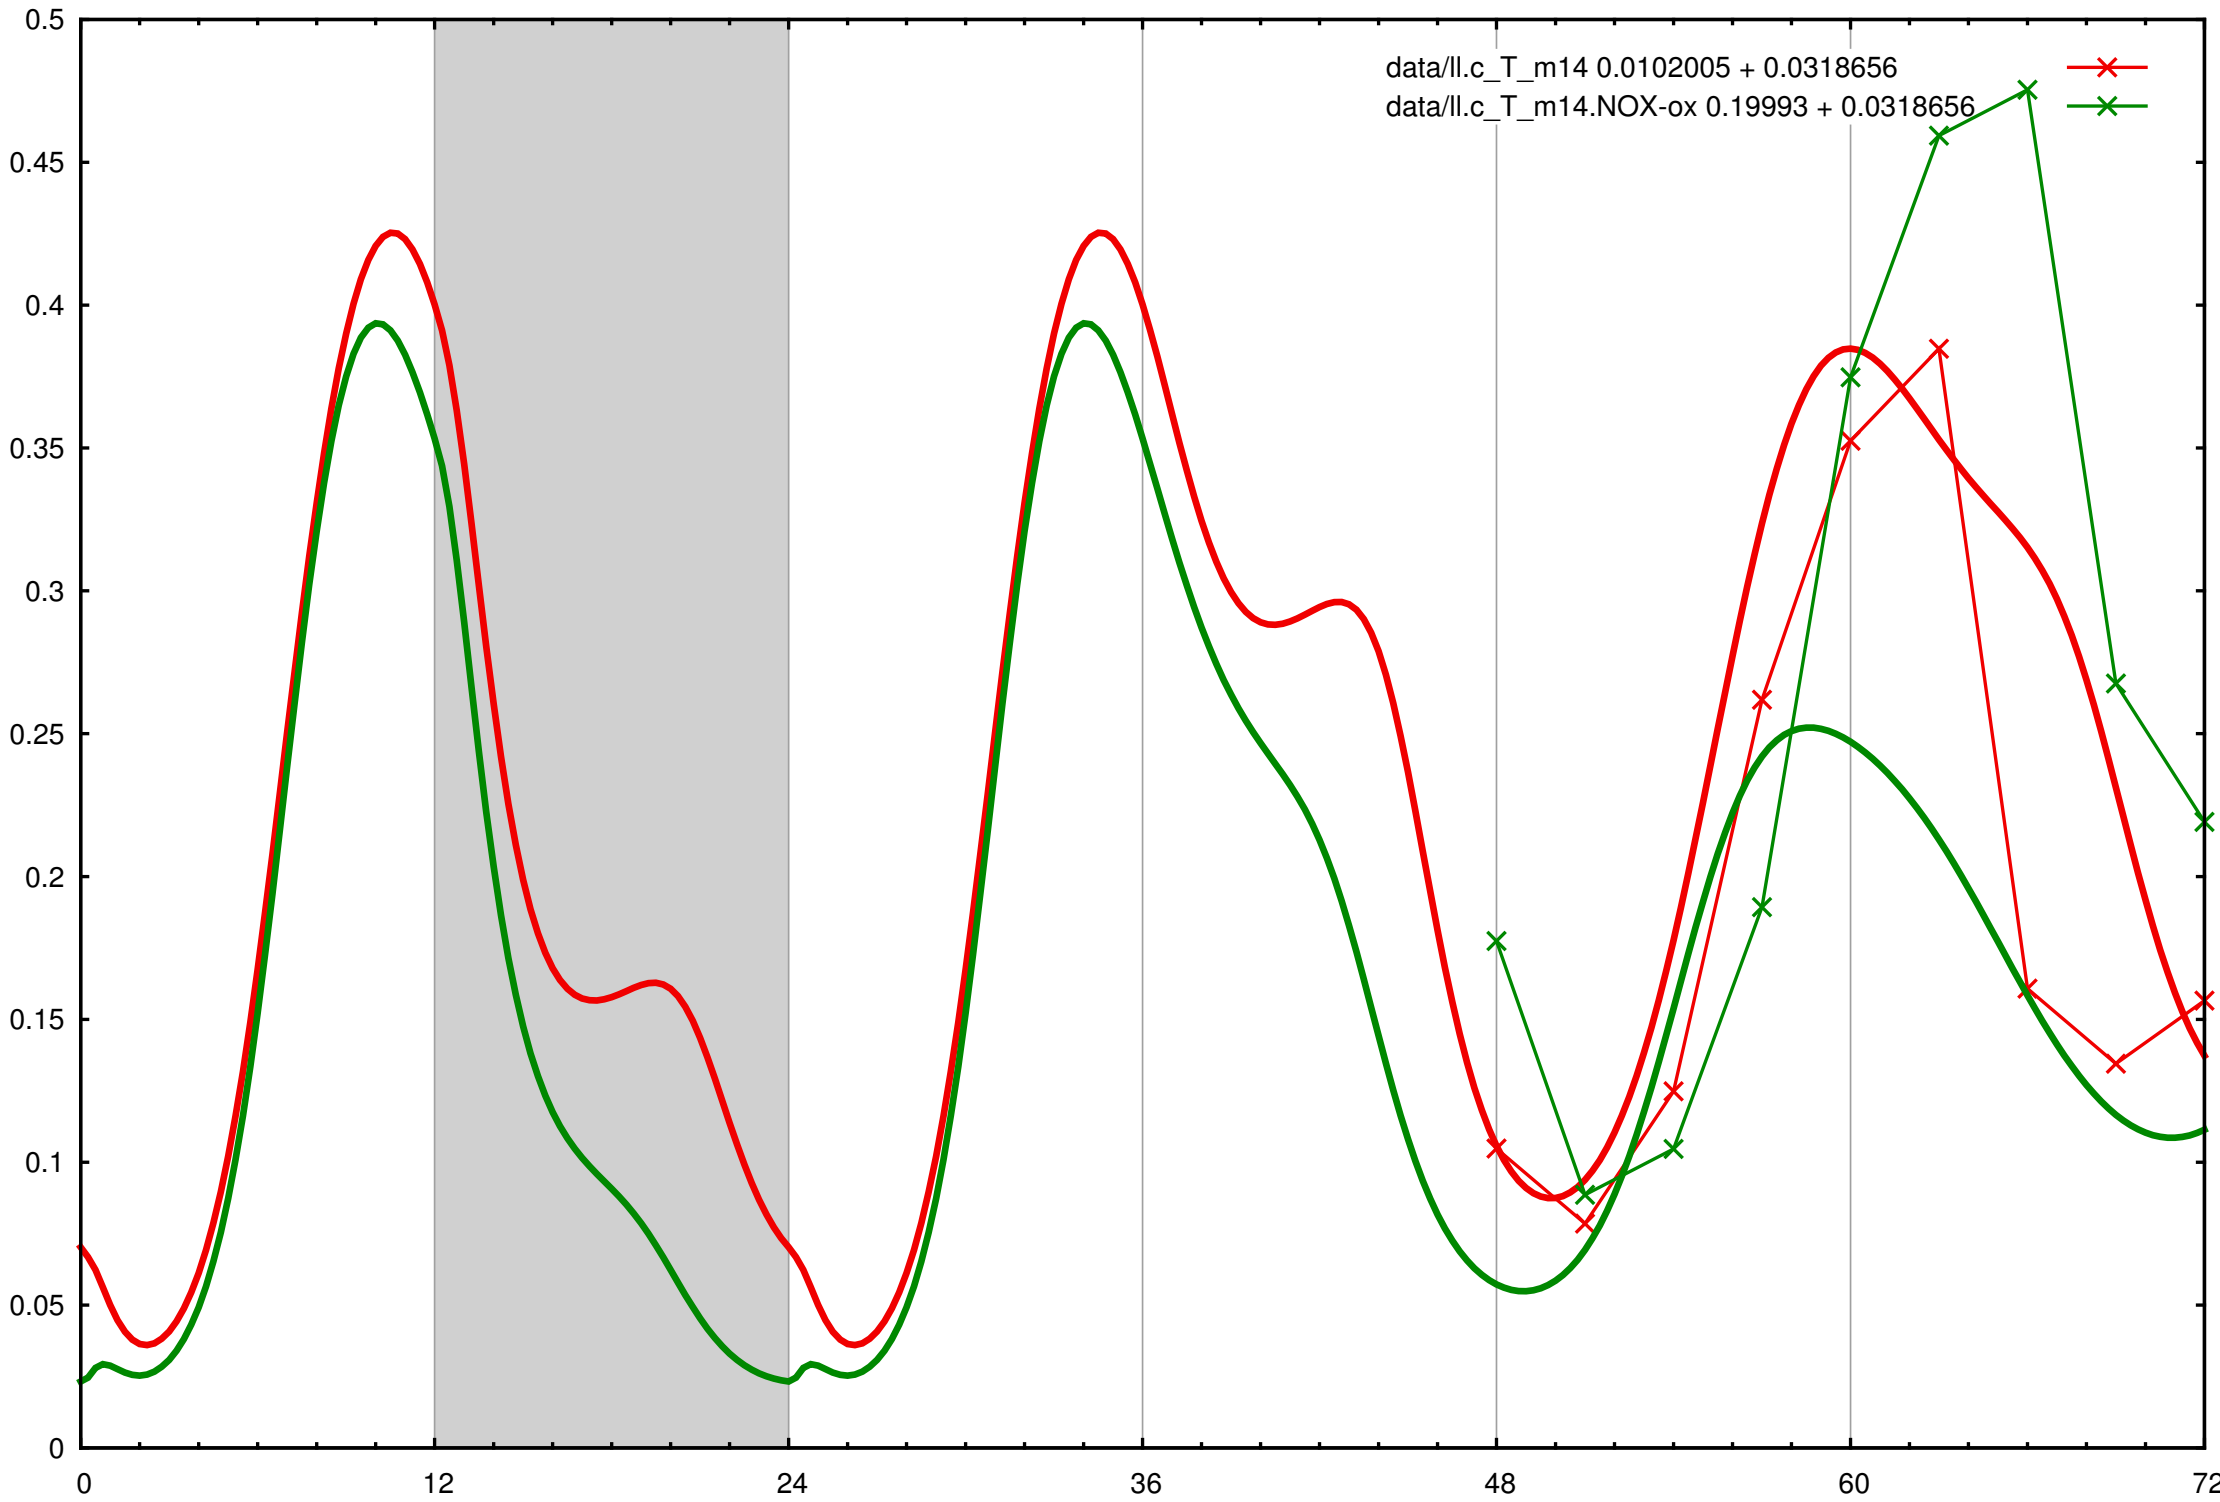

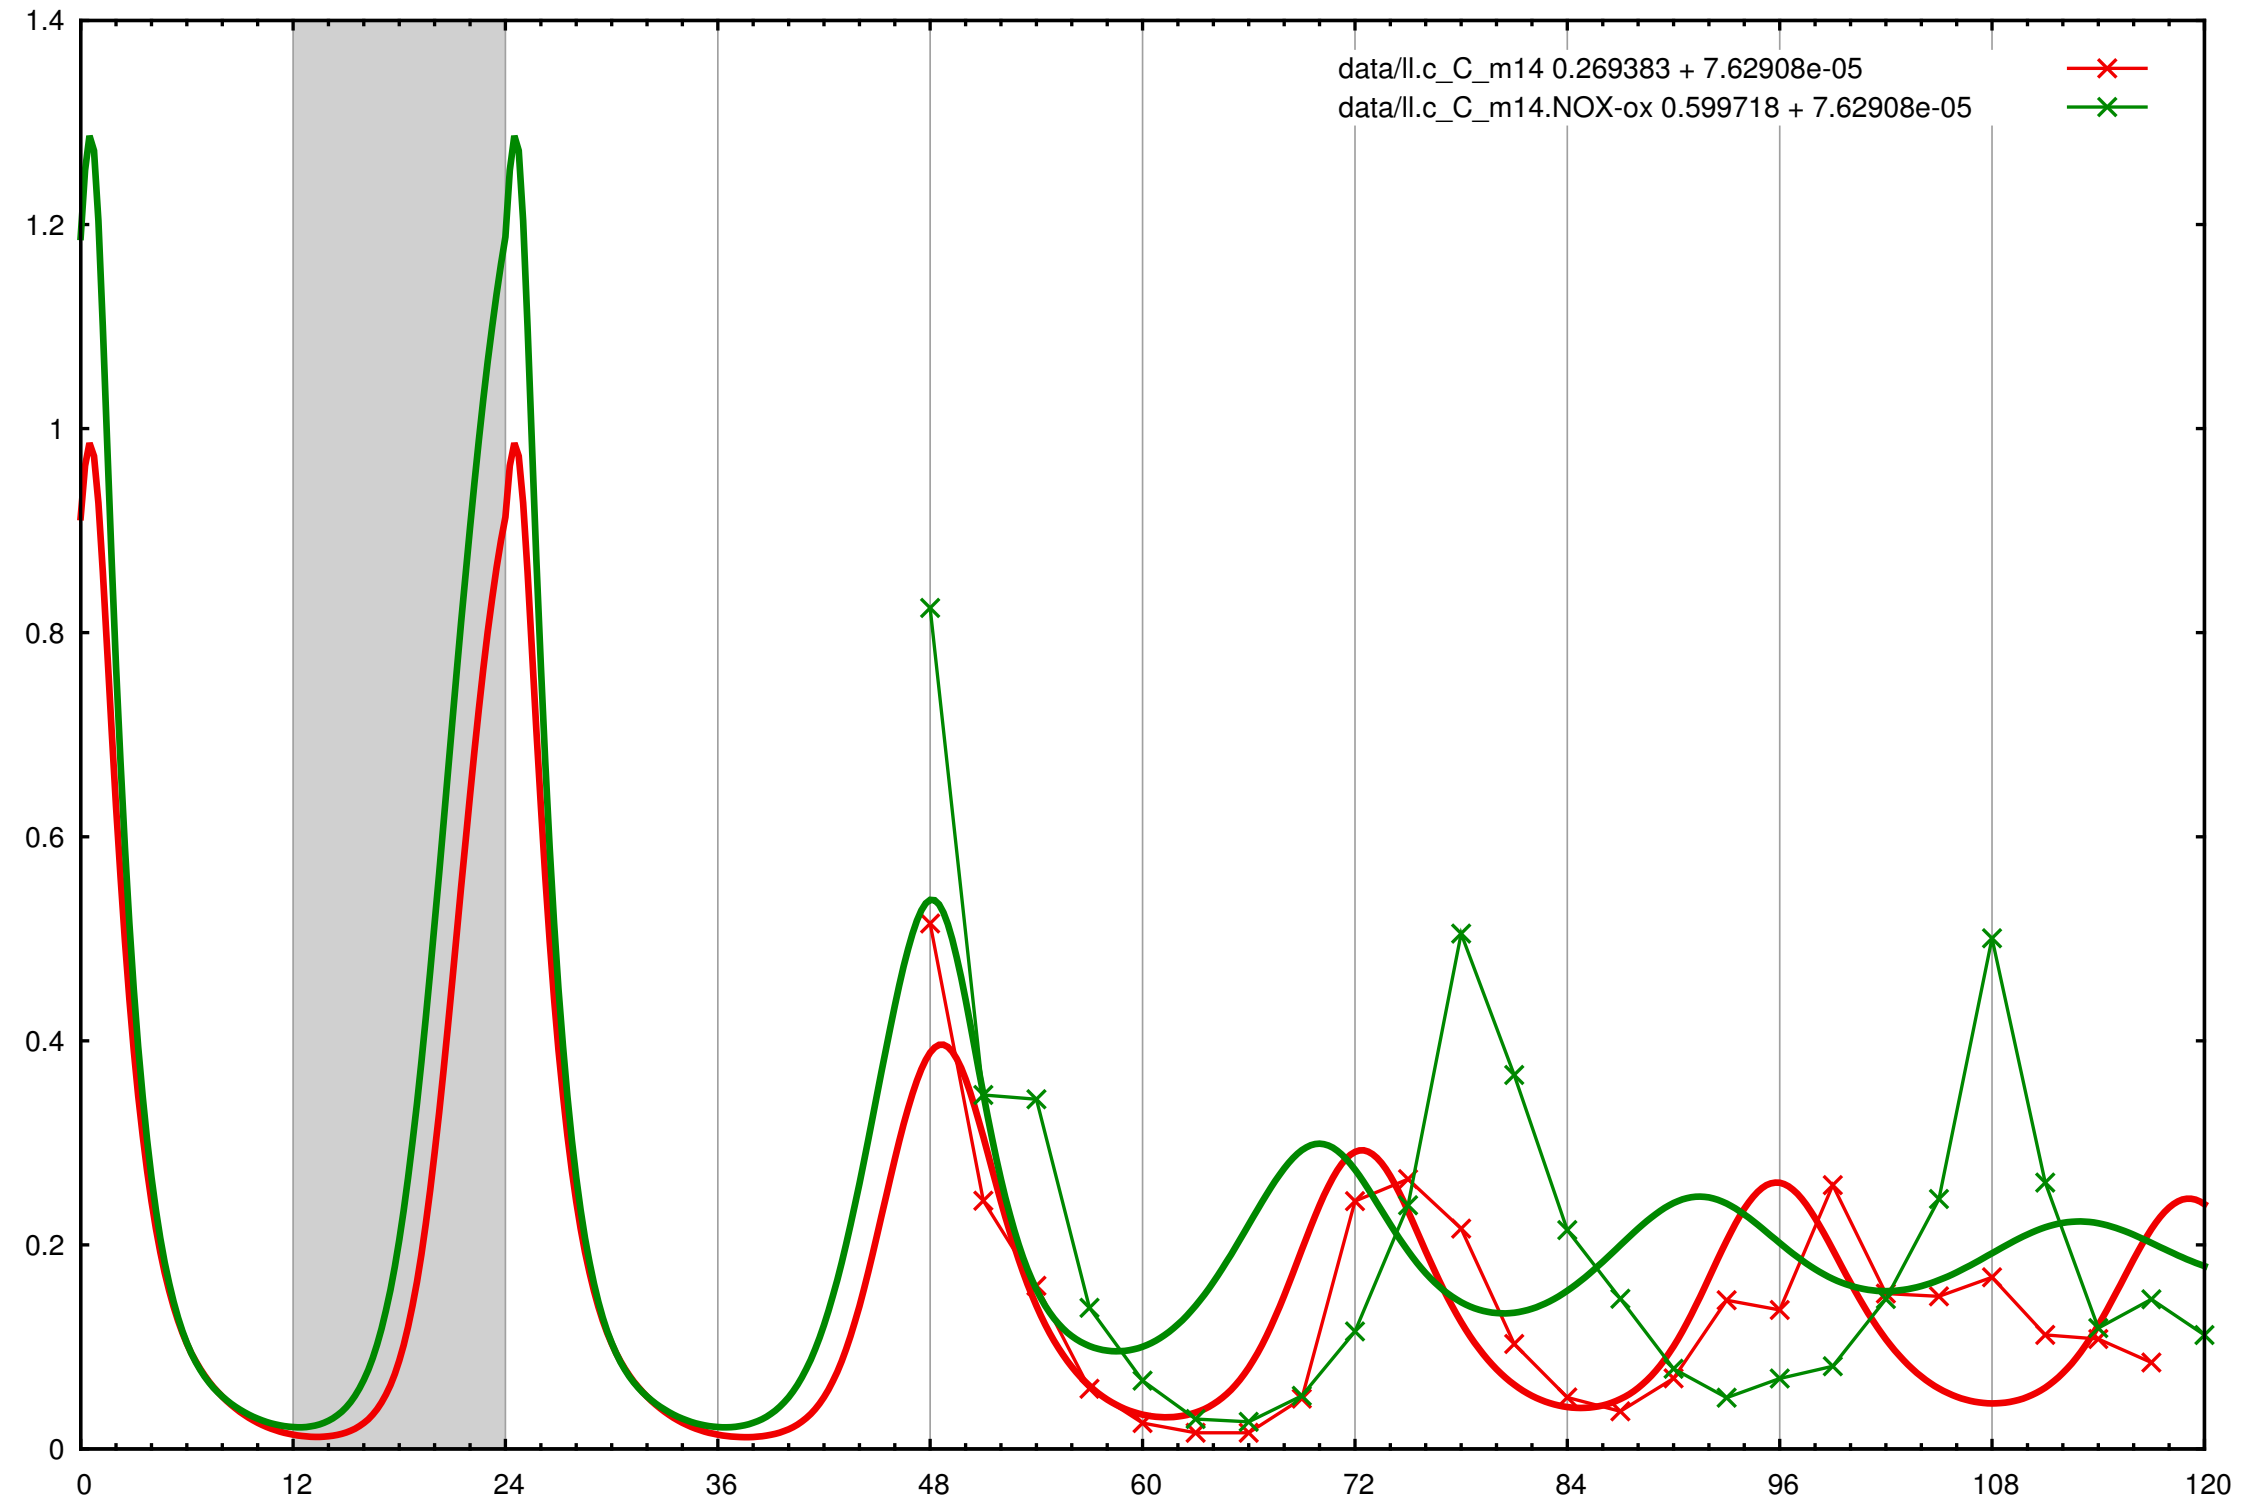

Scale group 140, scost 0.0319599

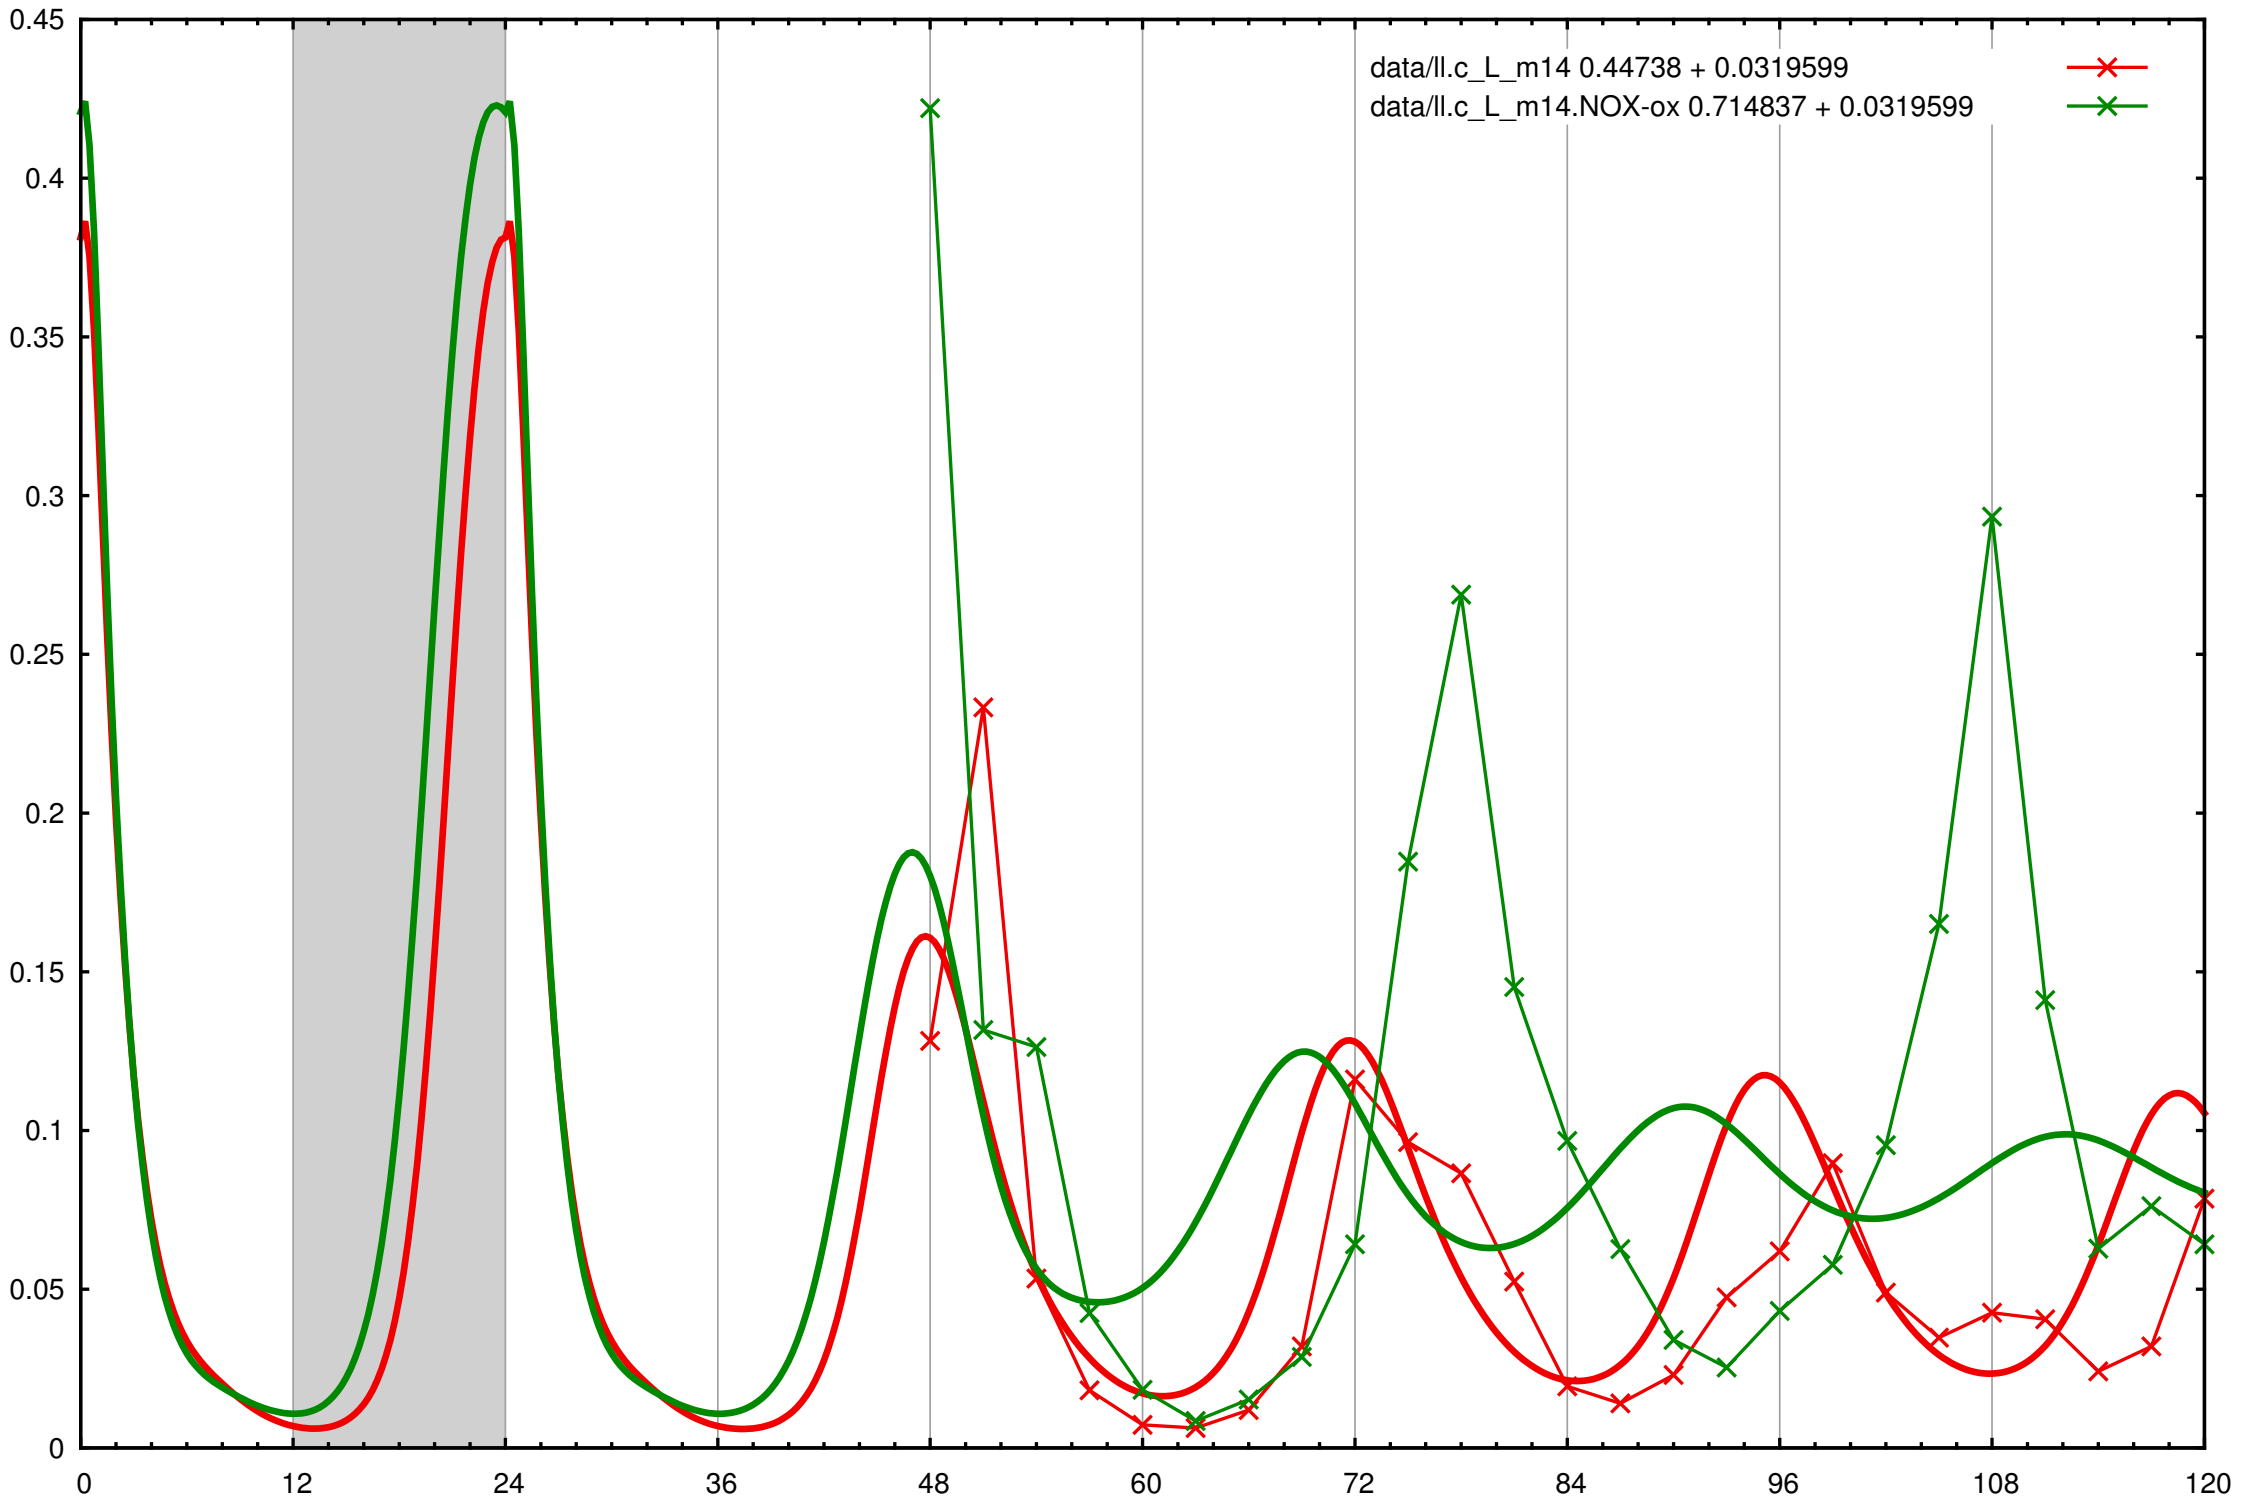

Scale group 141, scost 0.078327

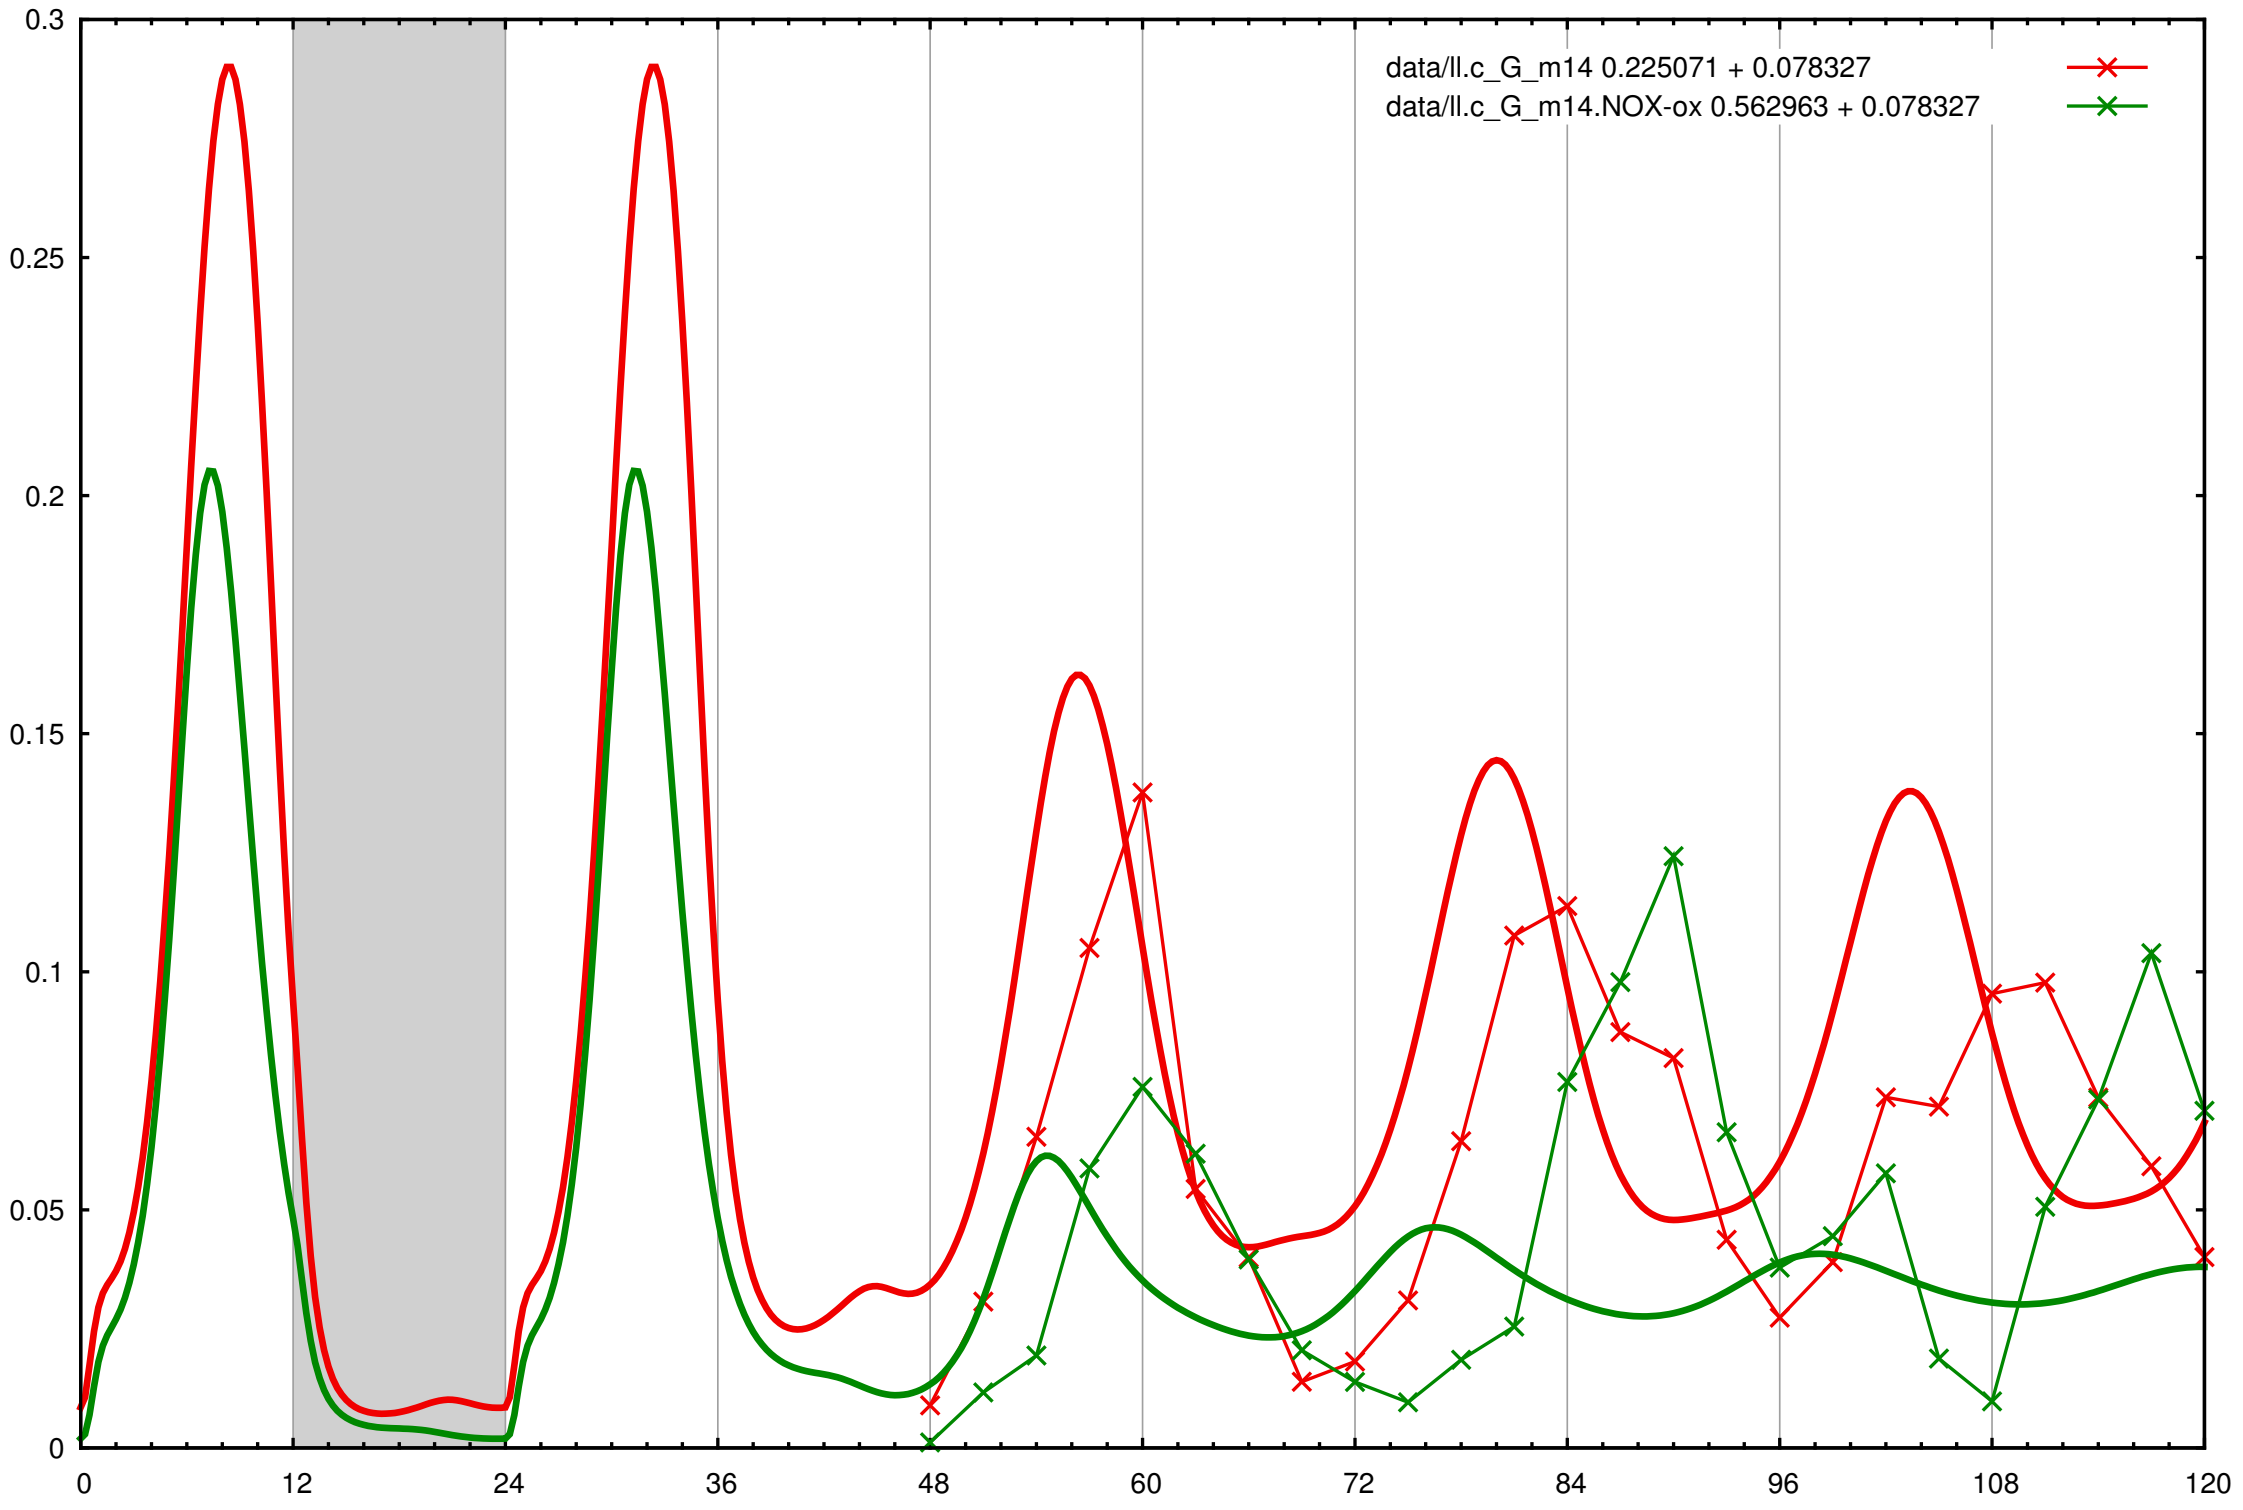

Scale group 142, scost 0.0233457

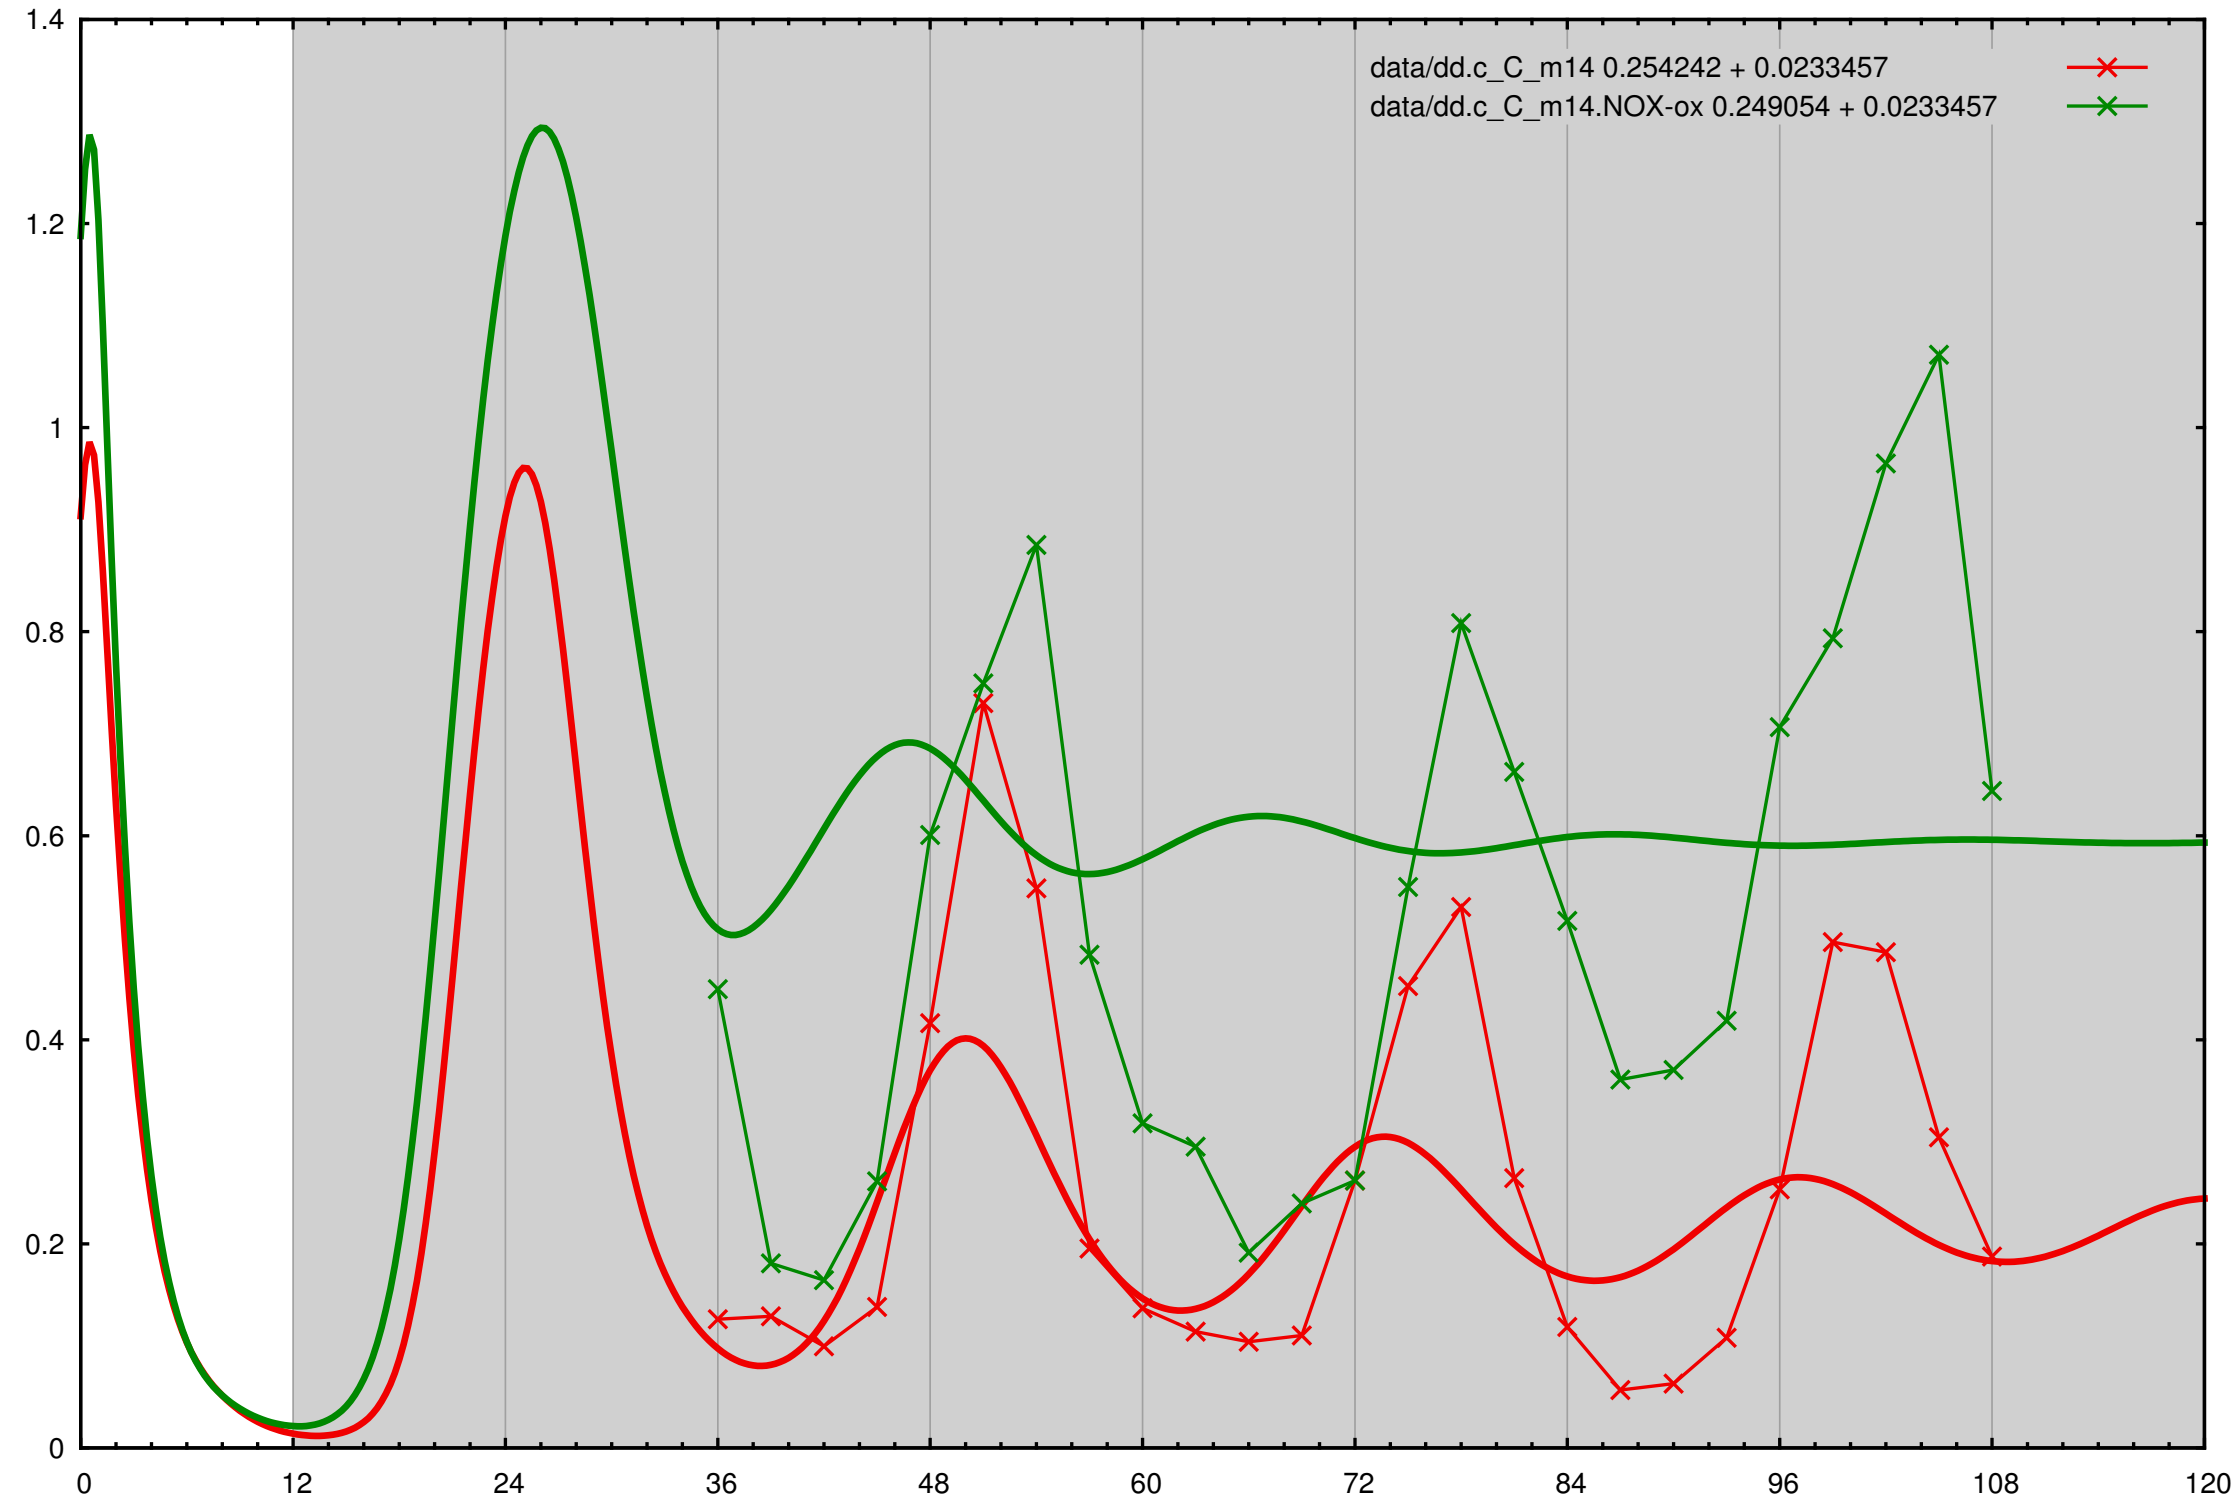

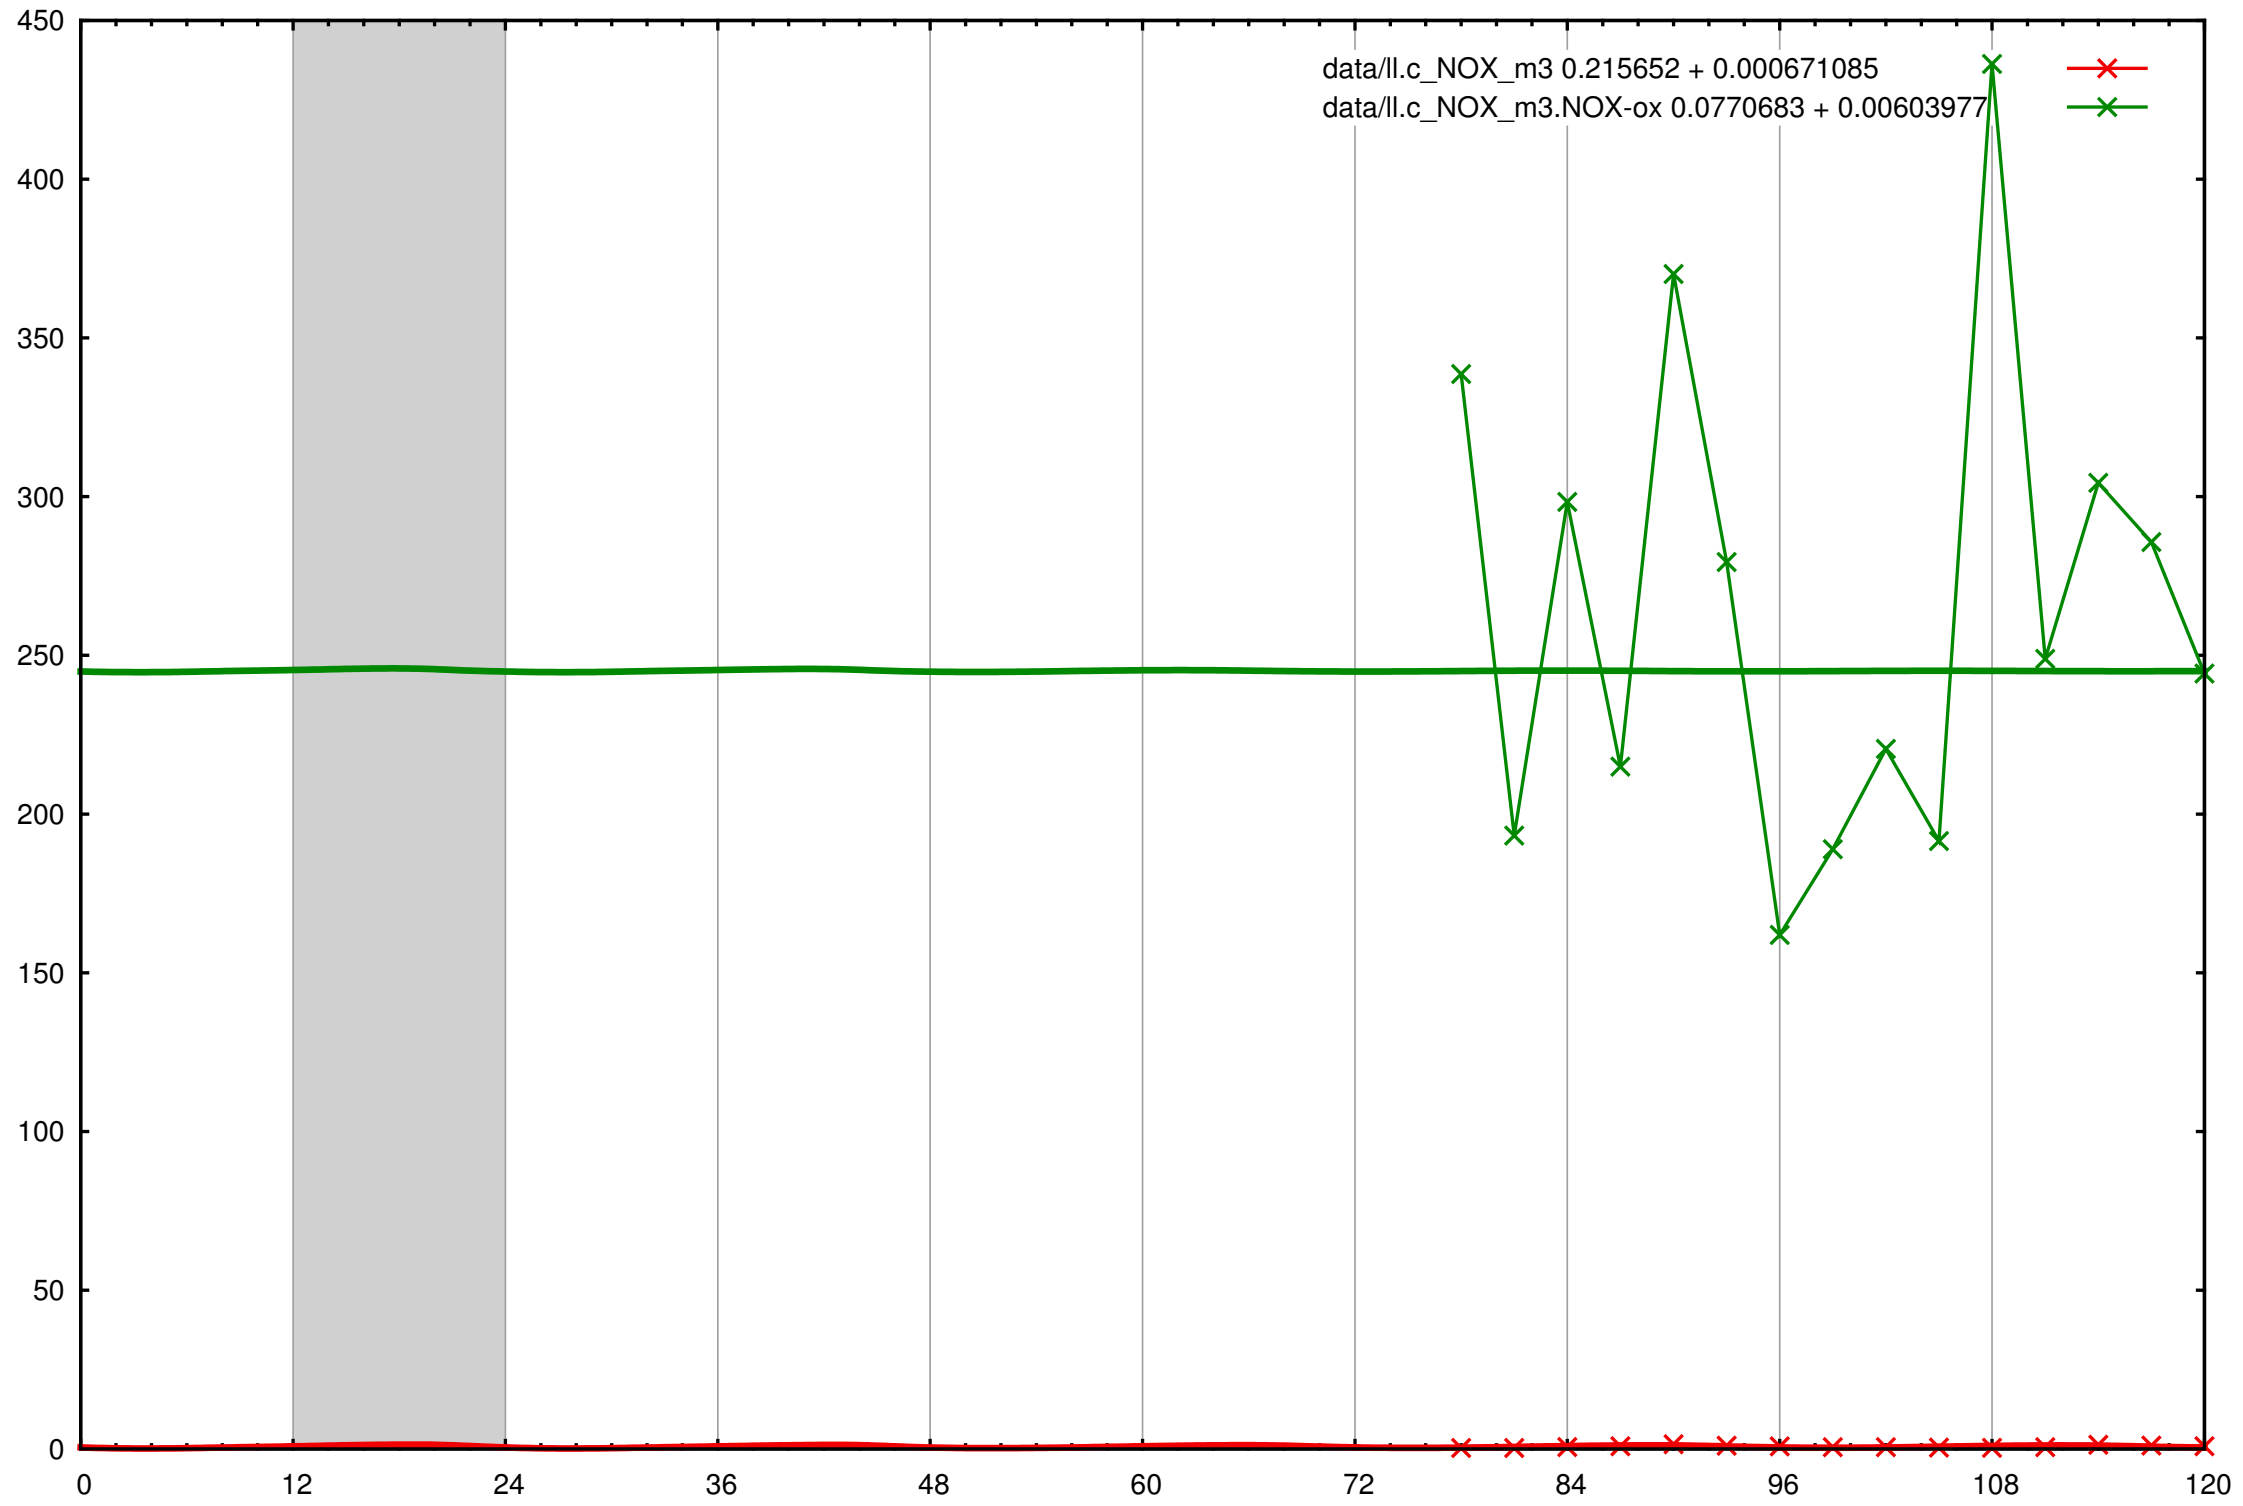

Scale group 144, scost 0.165835

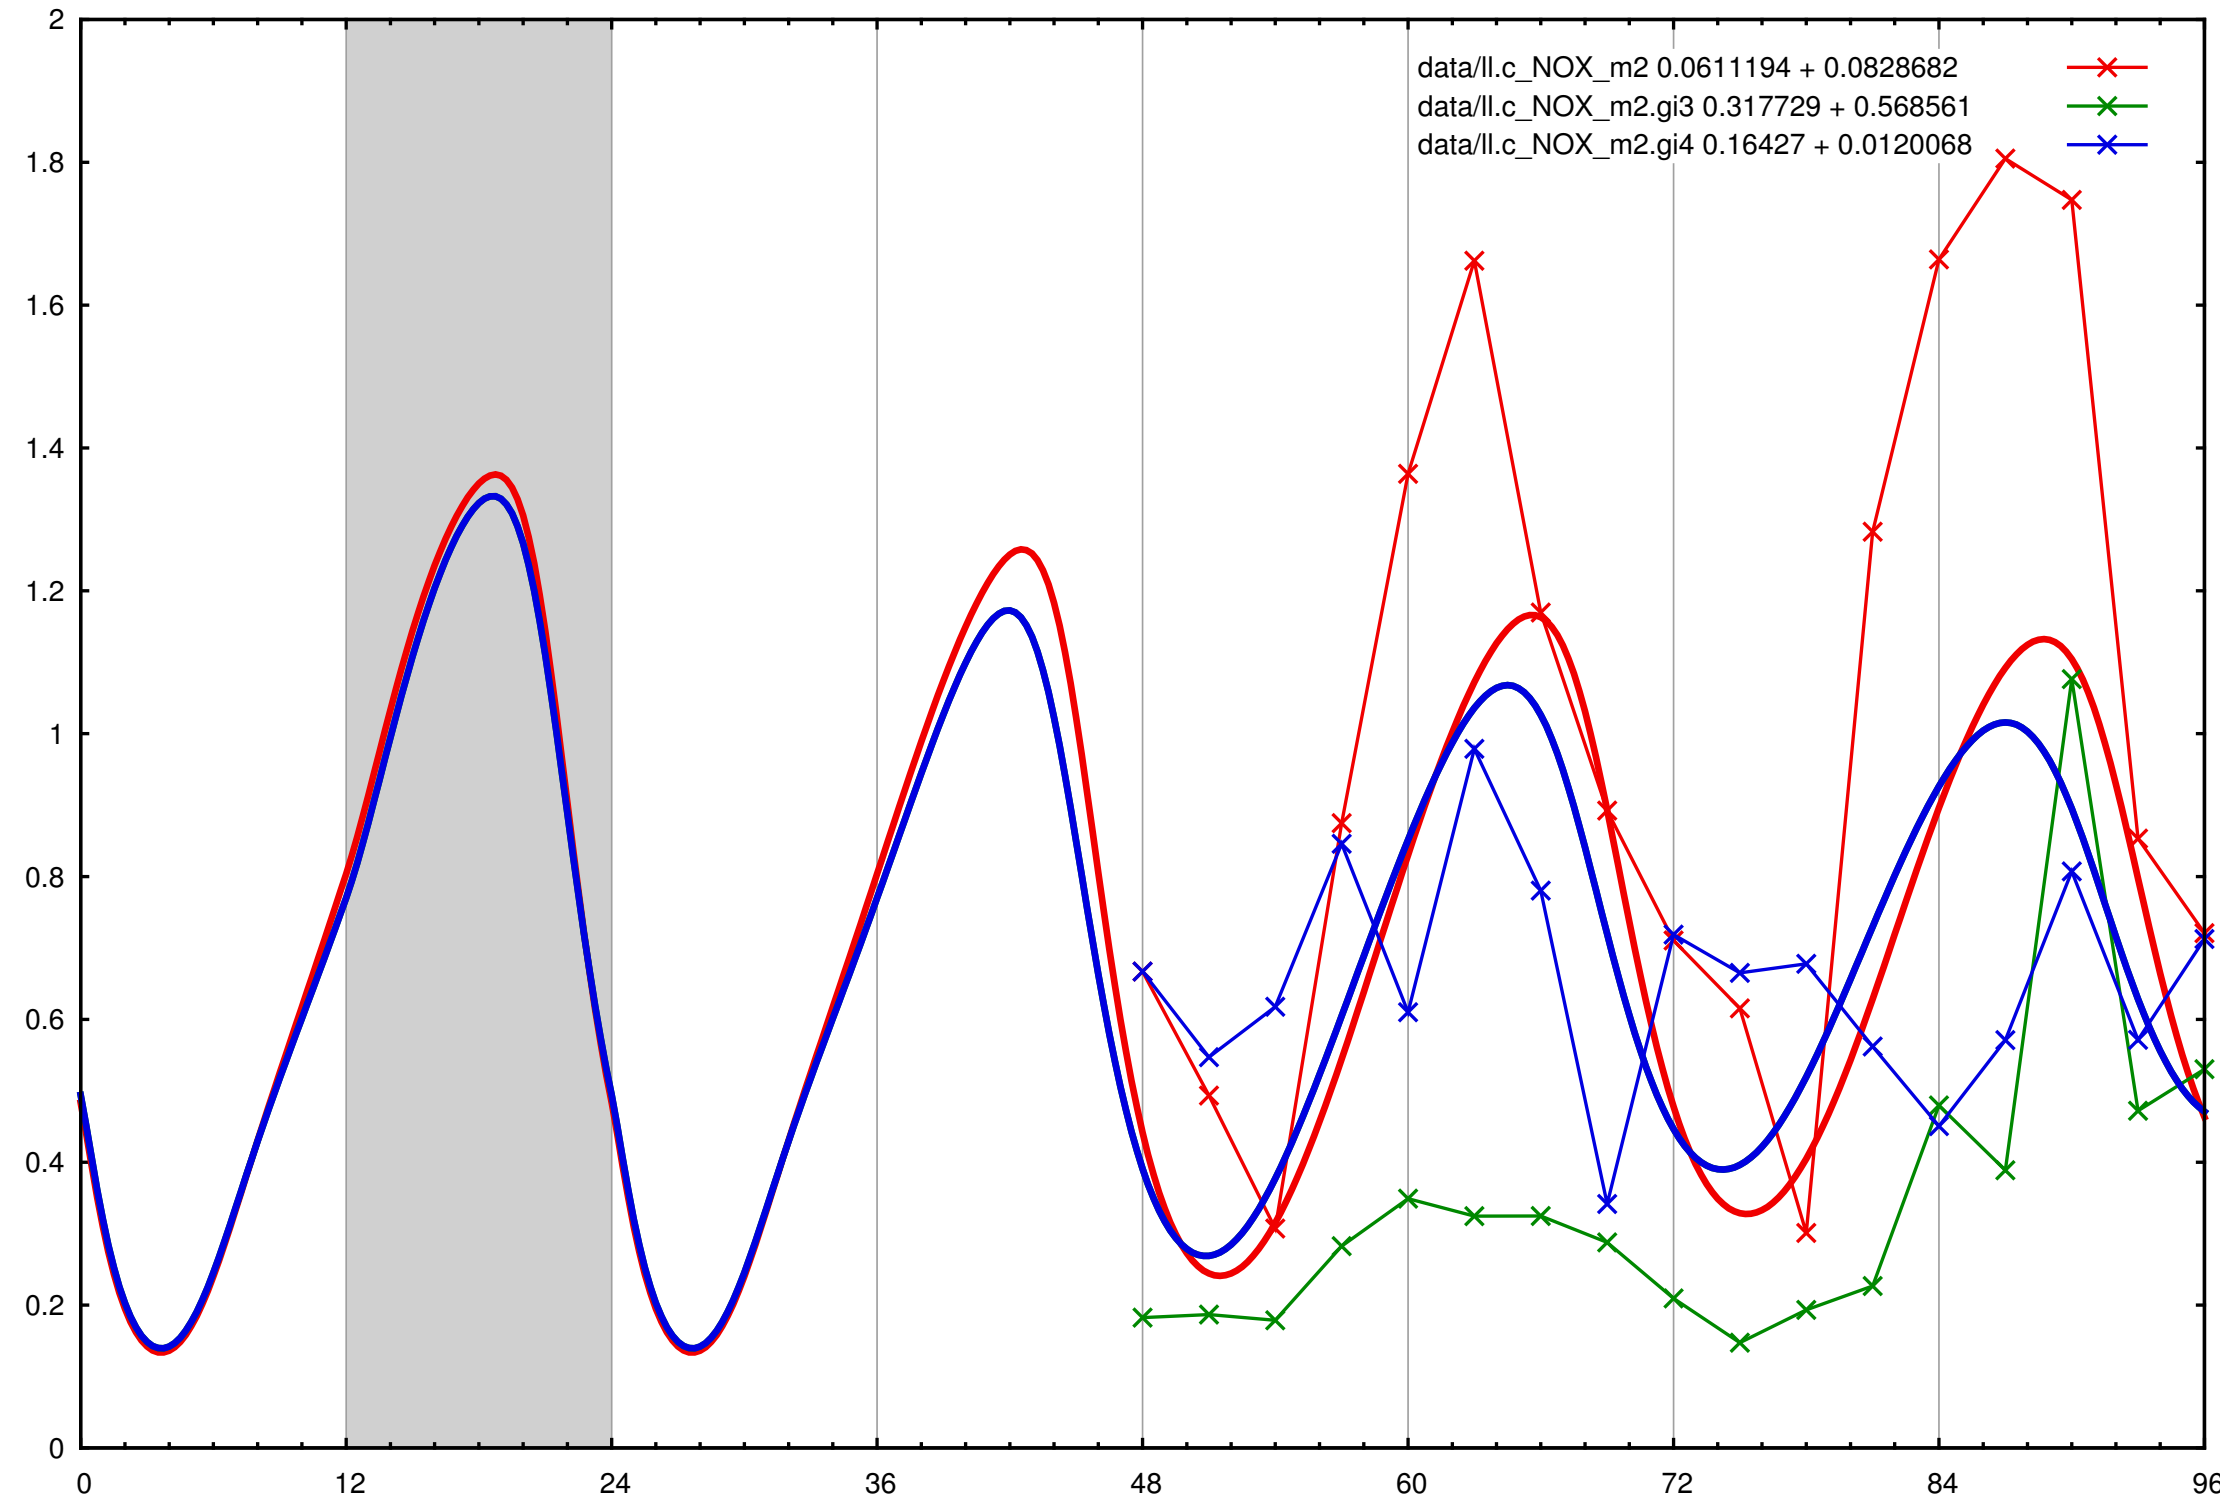



Scale group 145, scost 0.0499578

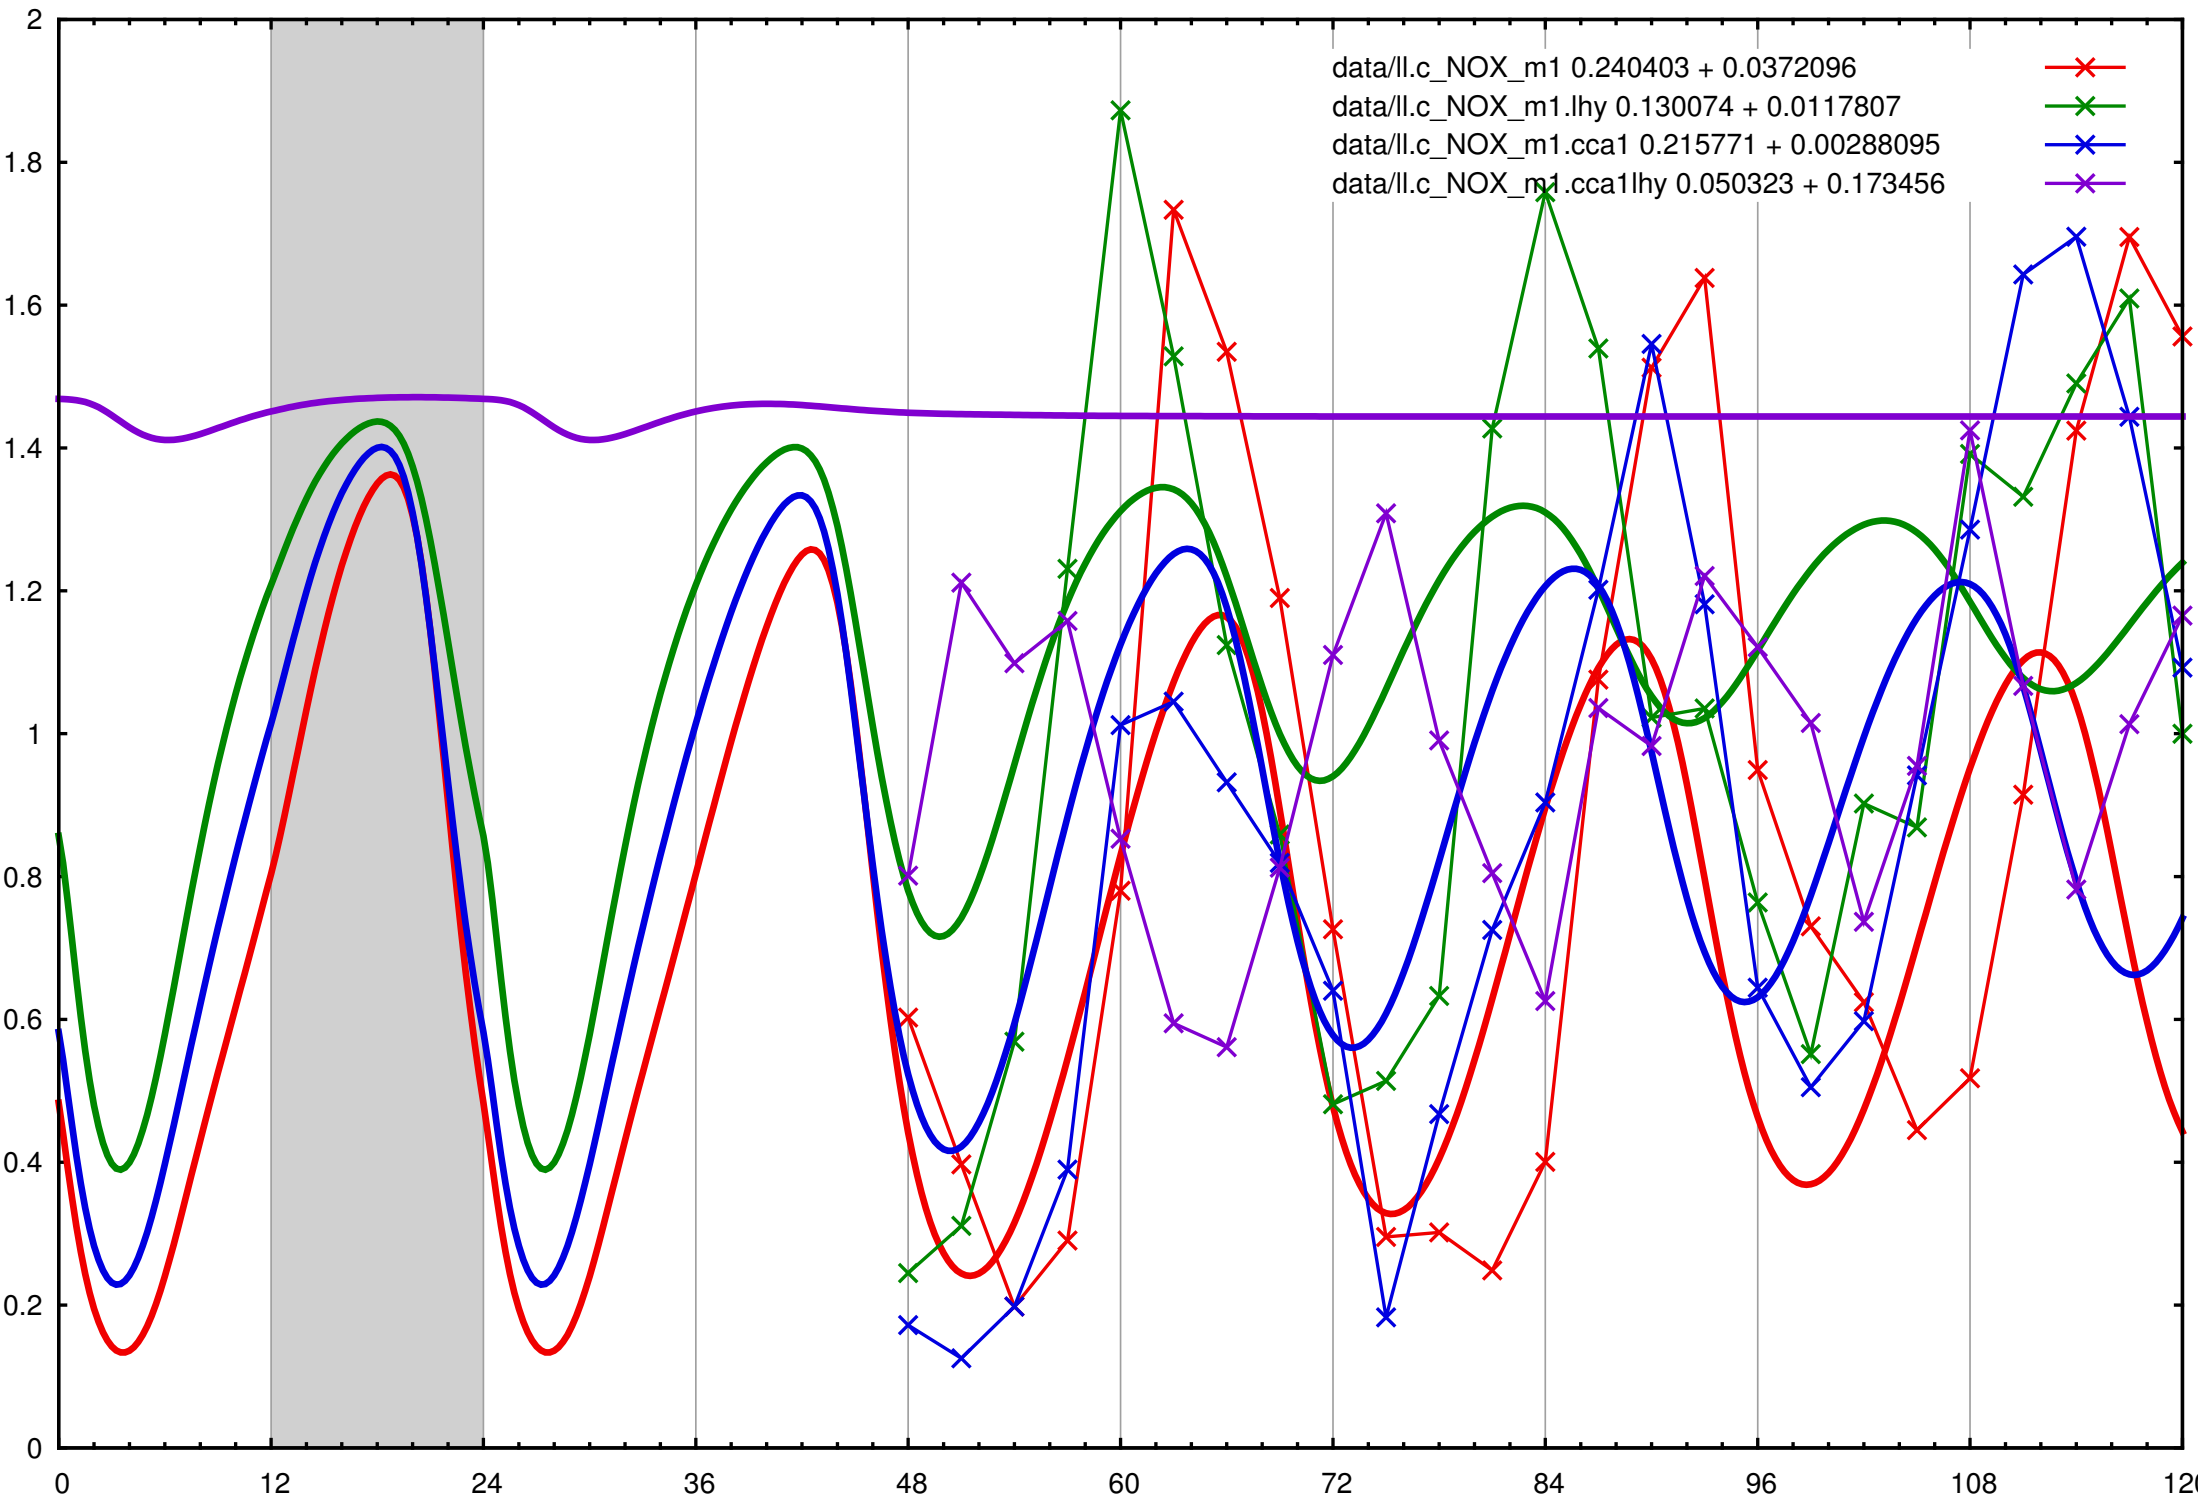

Scale group 146, scost 0.000258172

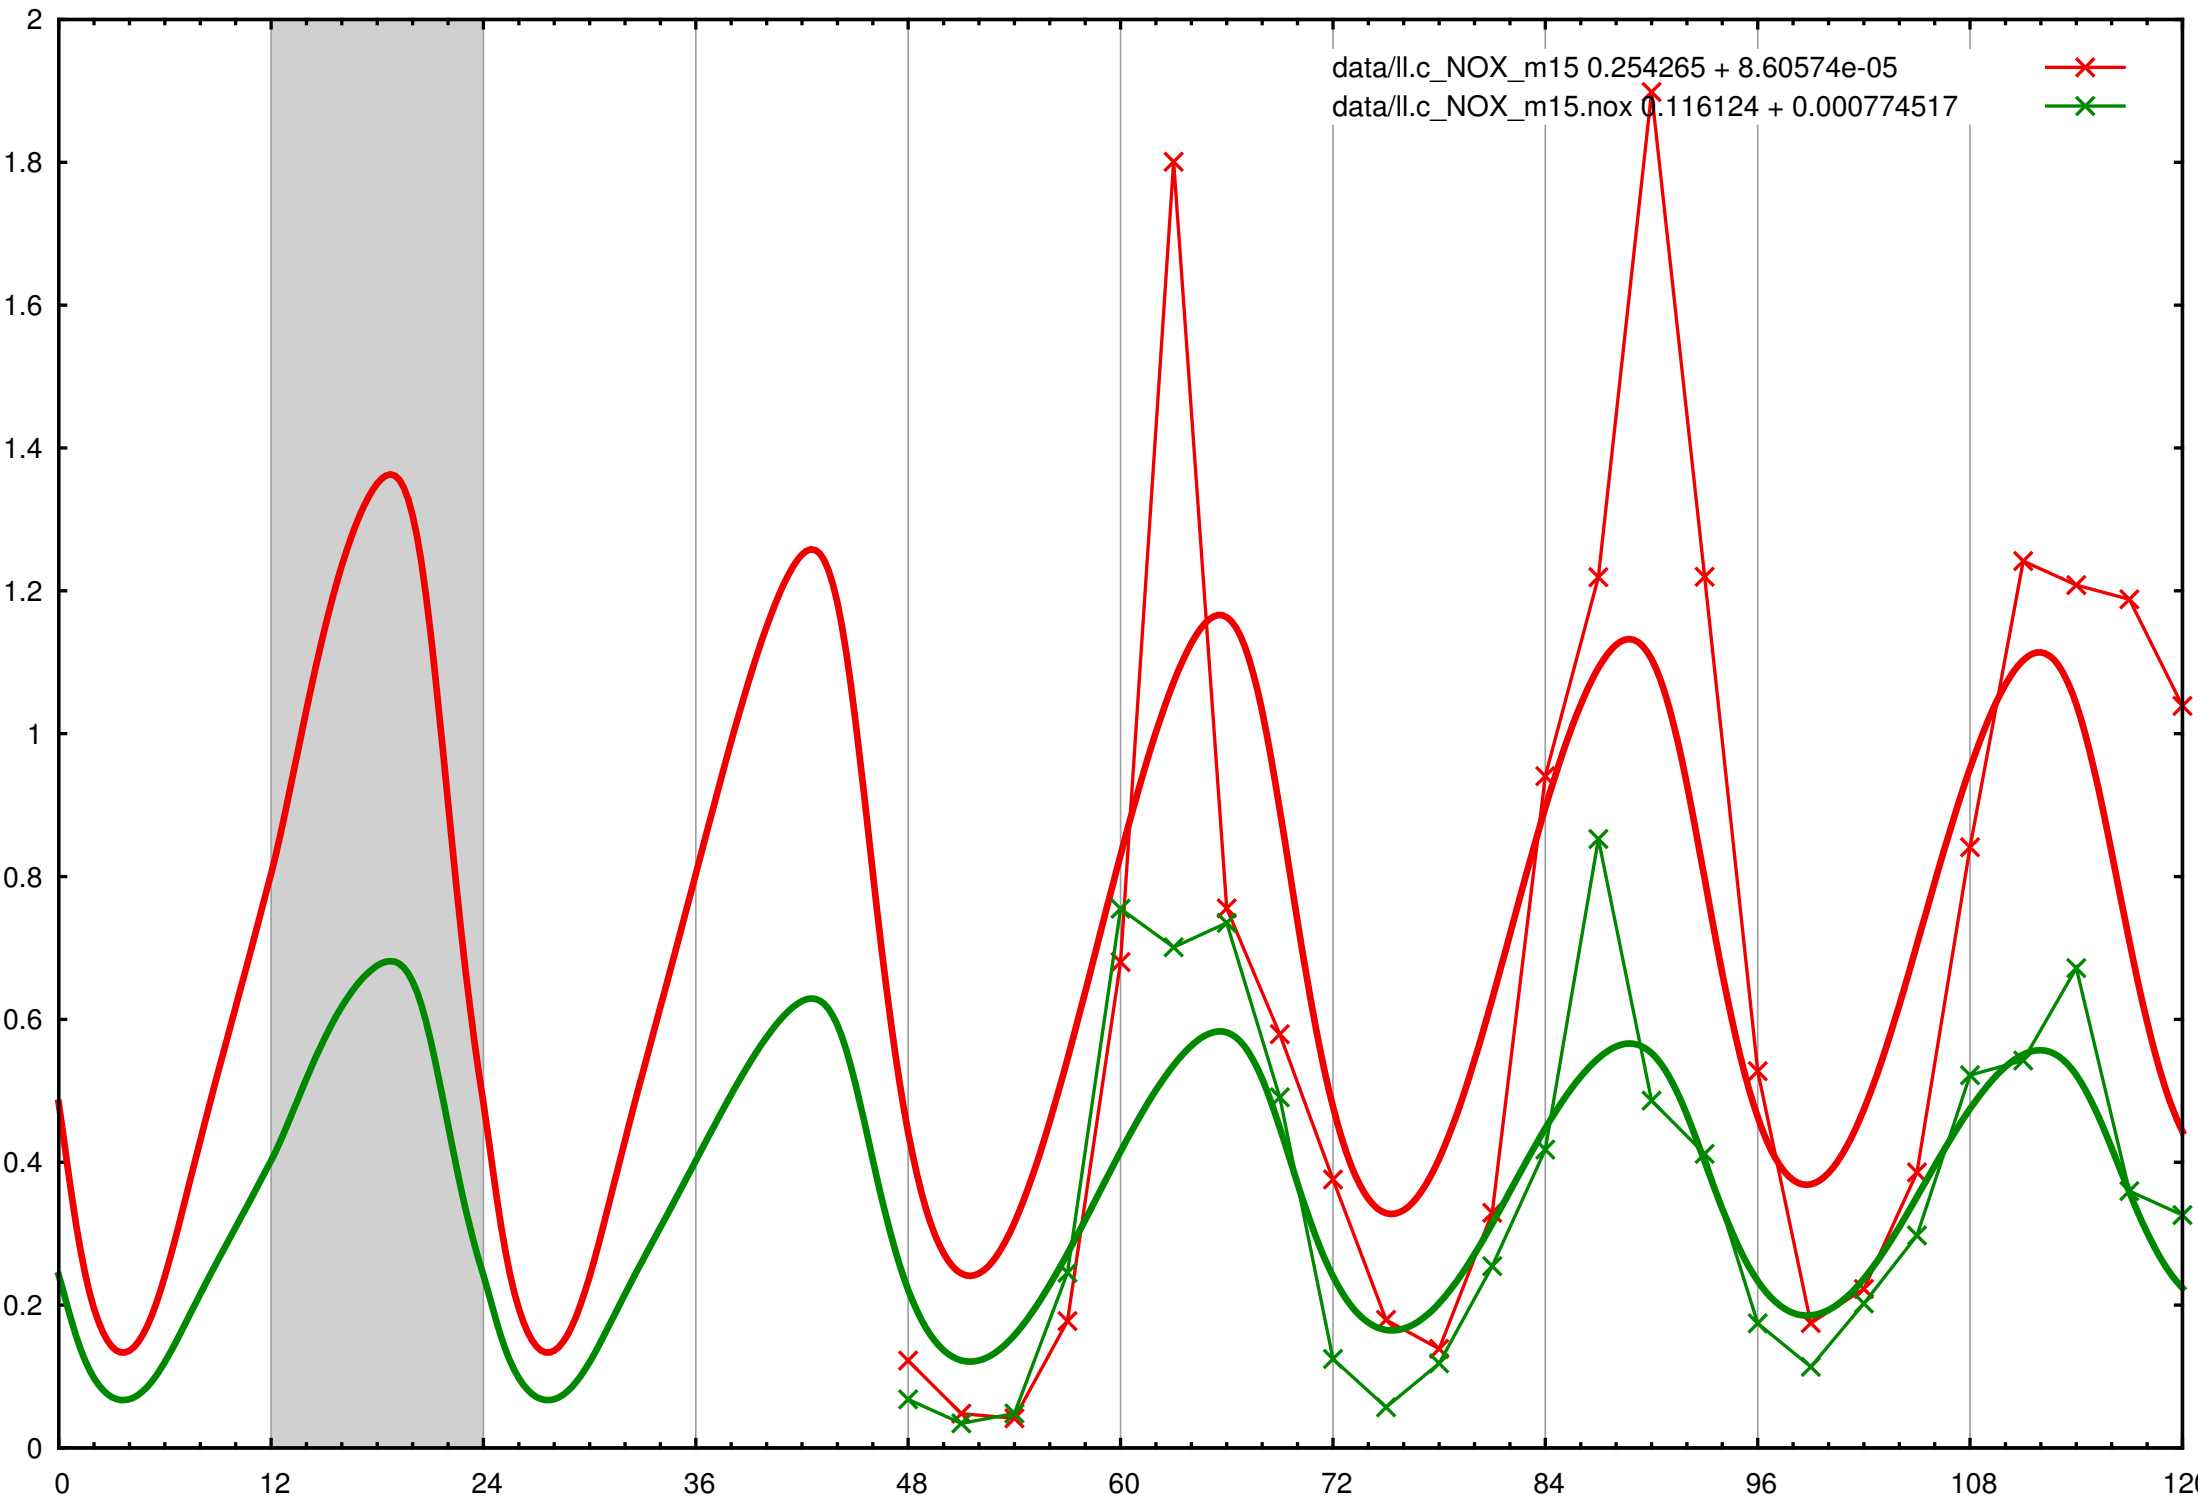

Scale group 147, scost 0.0636117

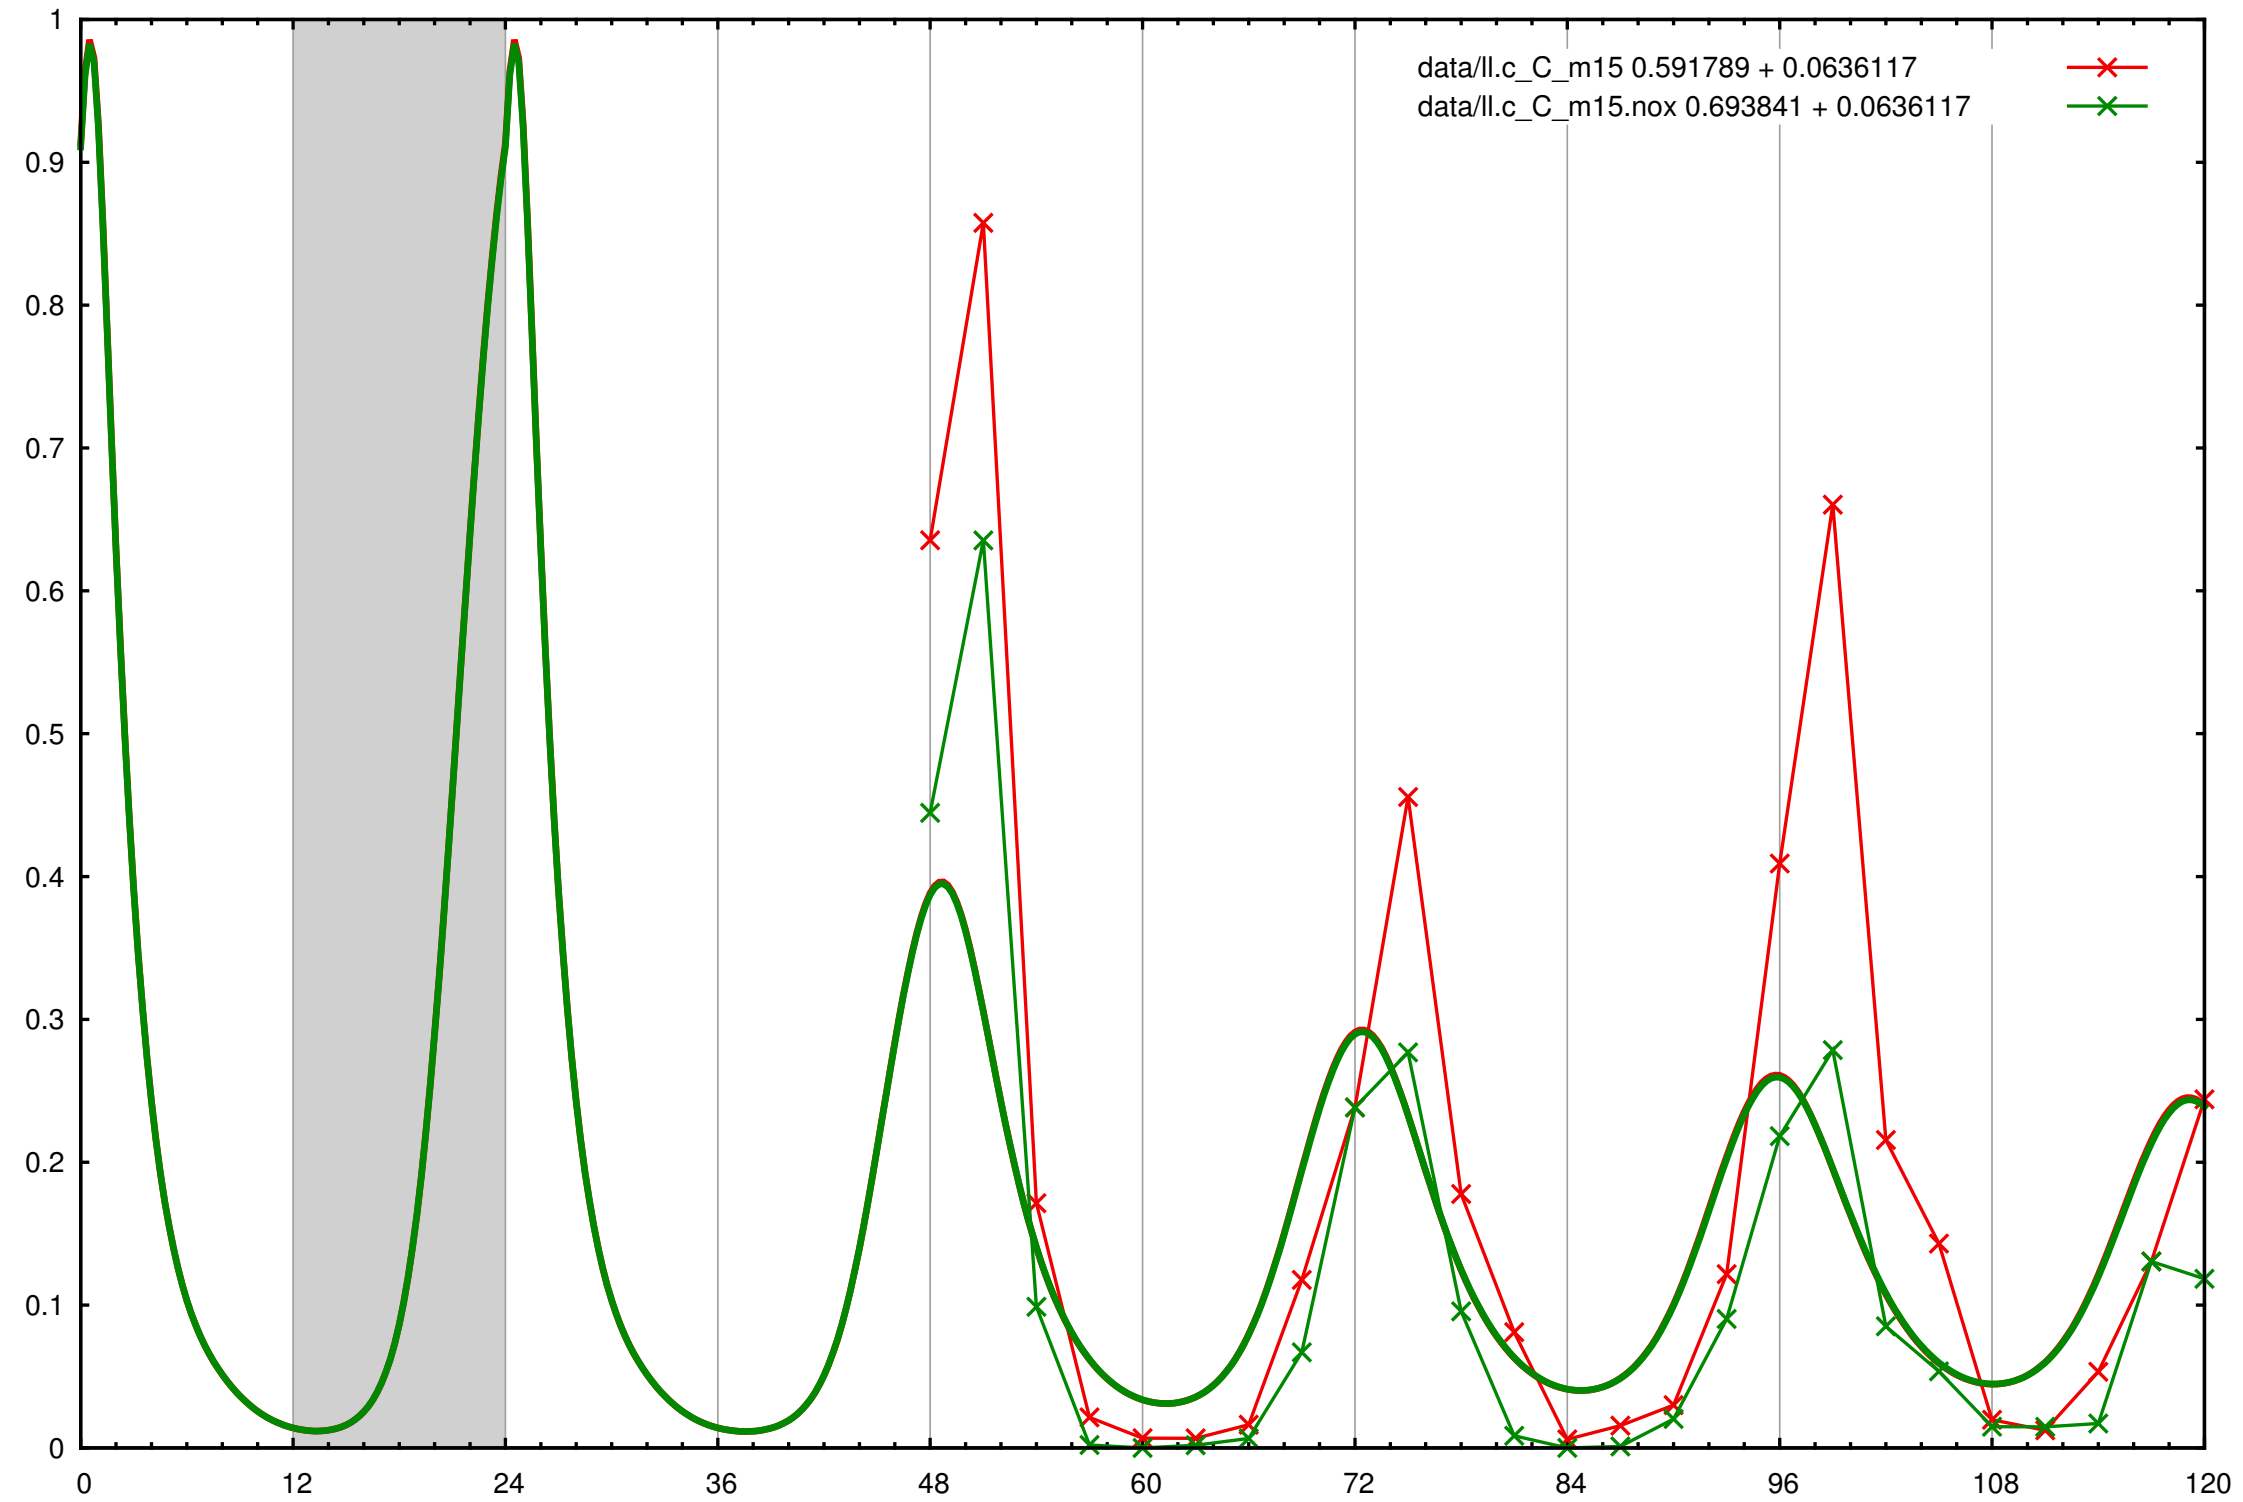

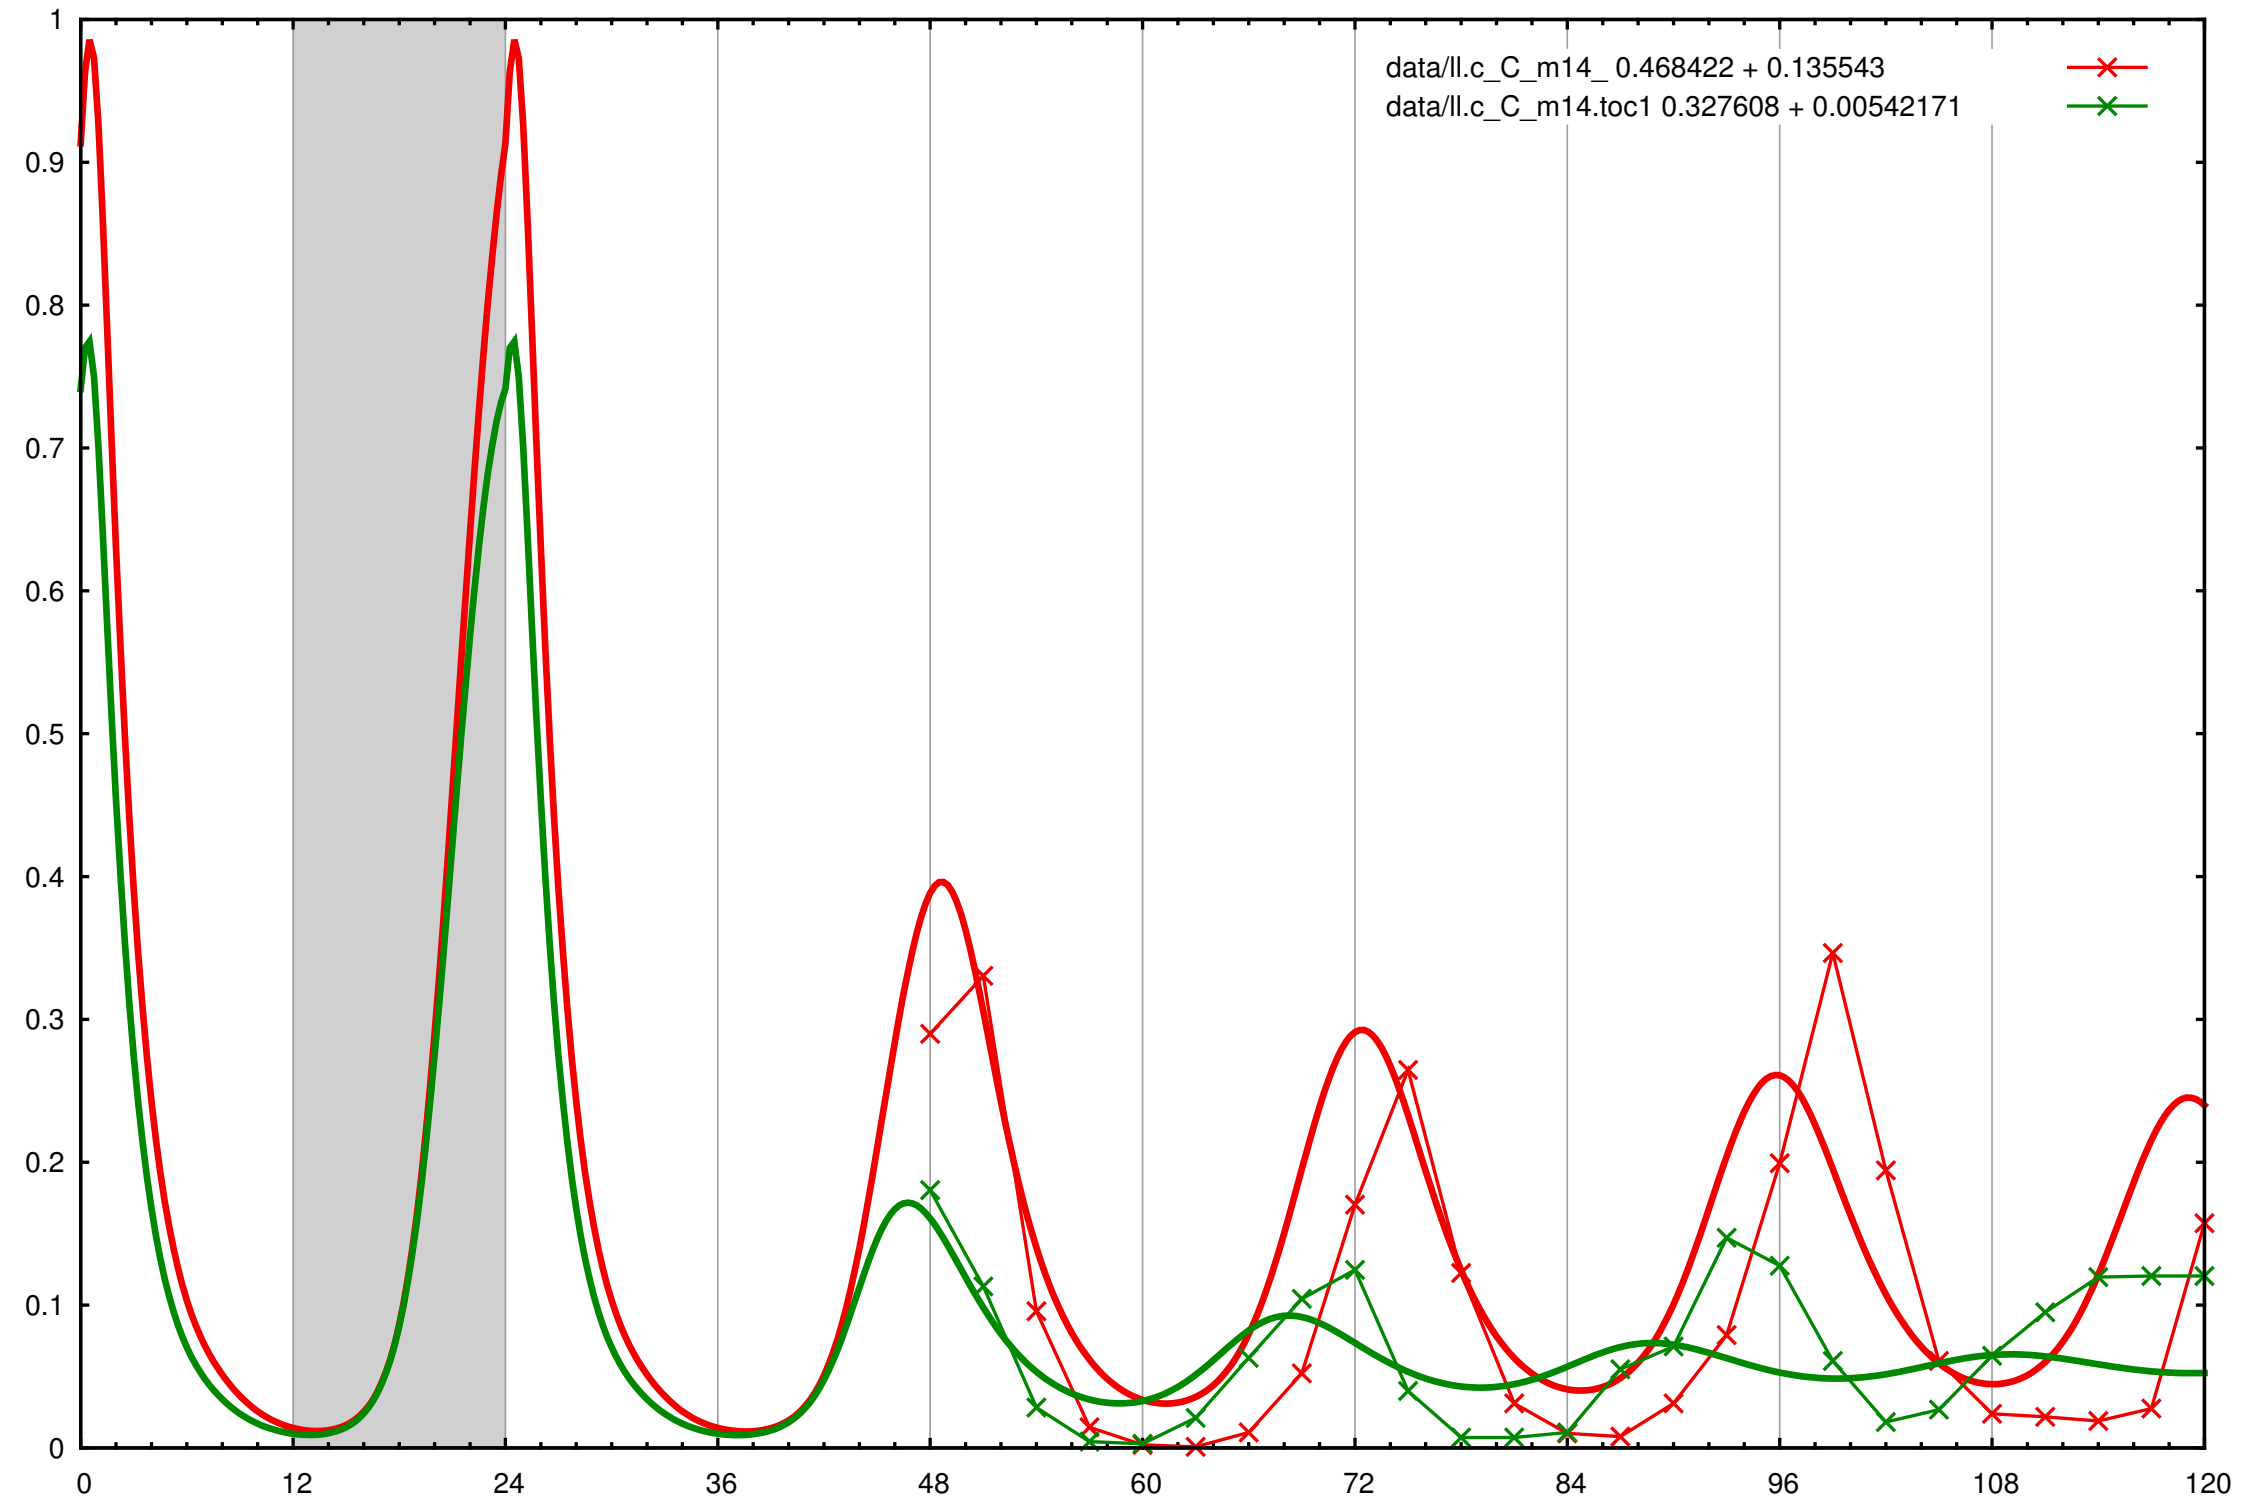

Scale group 149, scost 0.1329

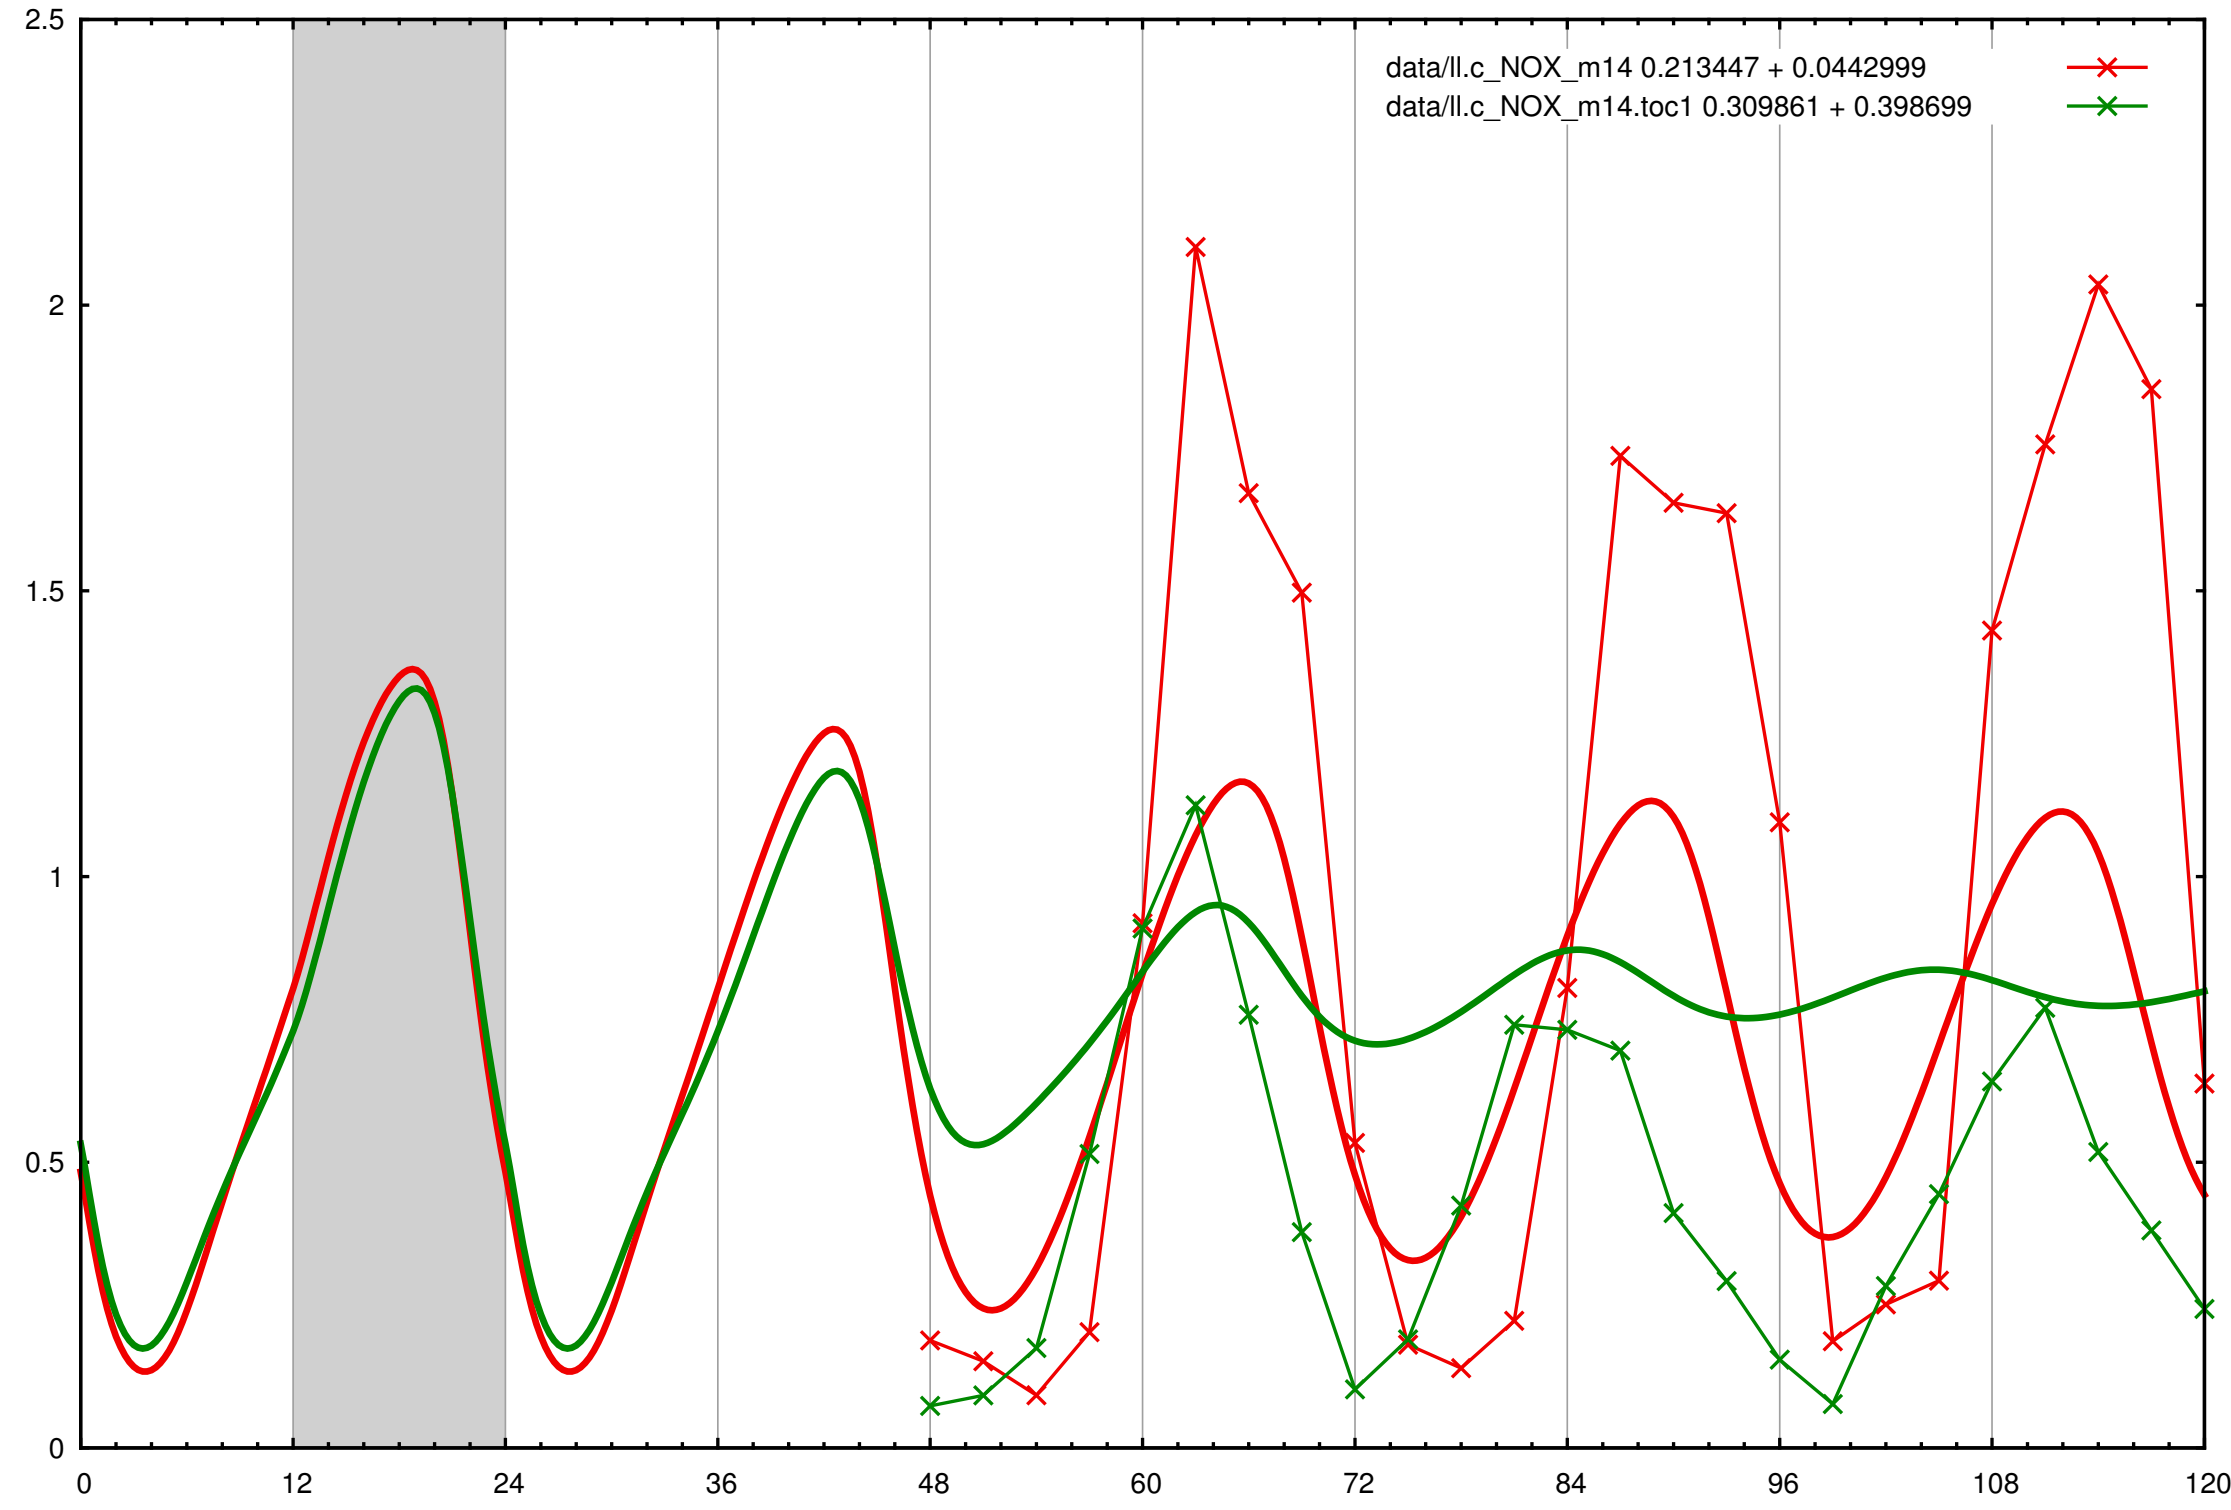

Scale group 150, scost 0.0688543

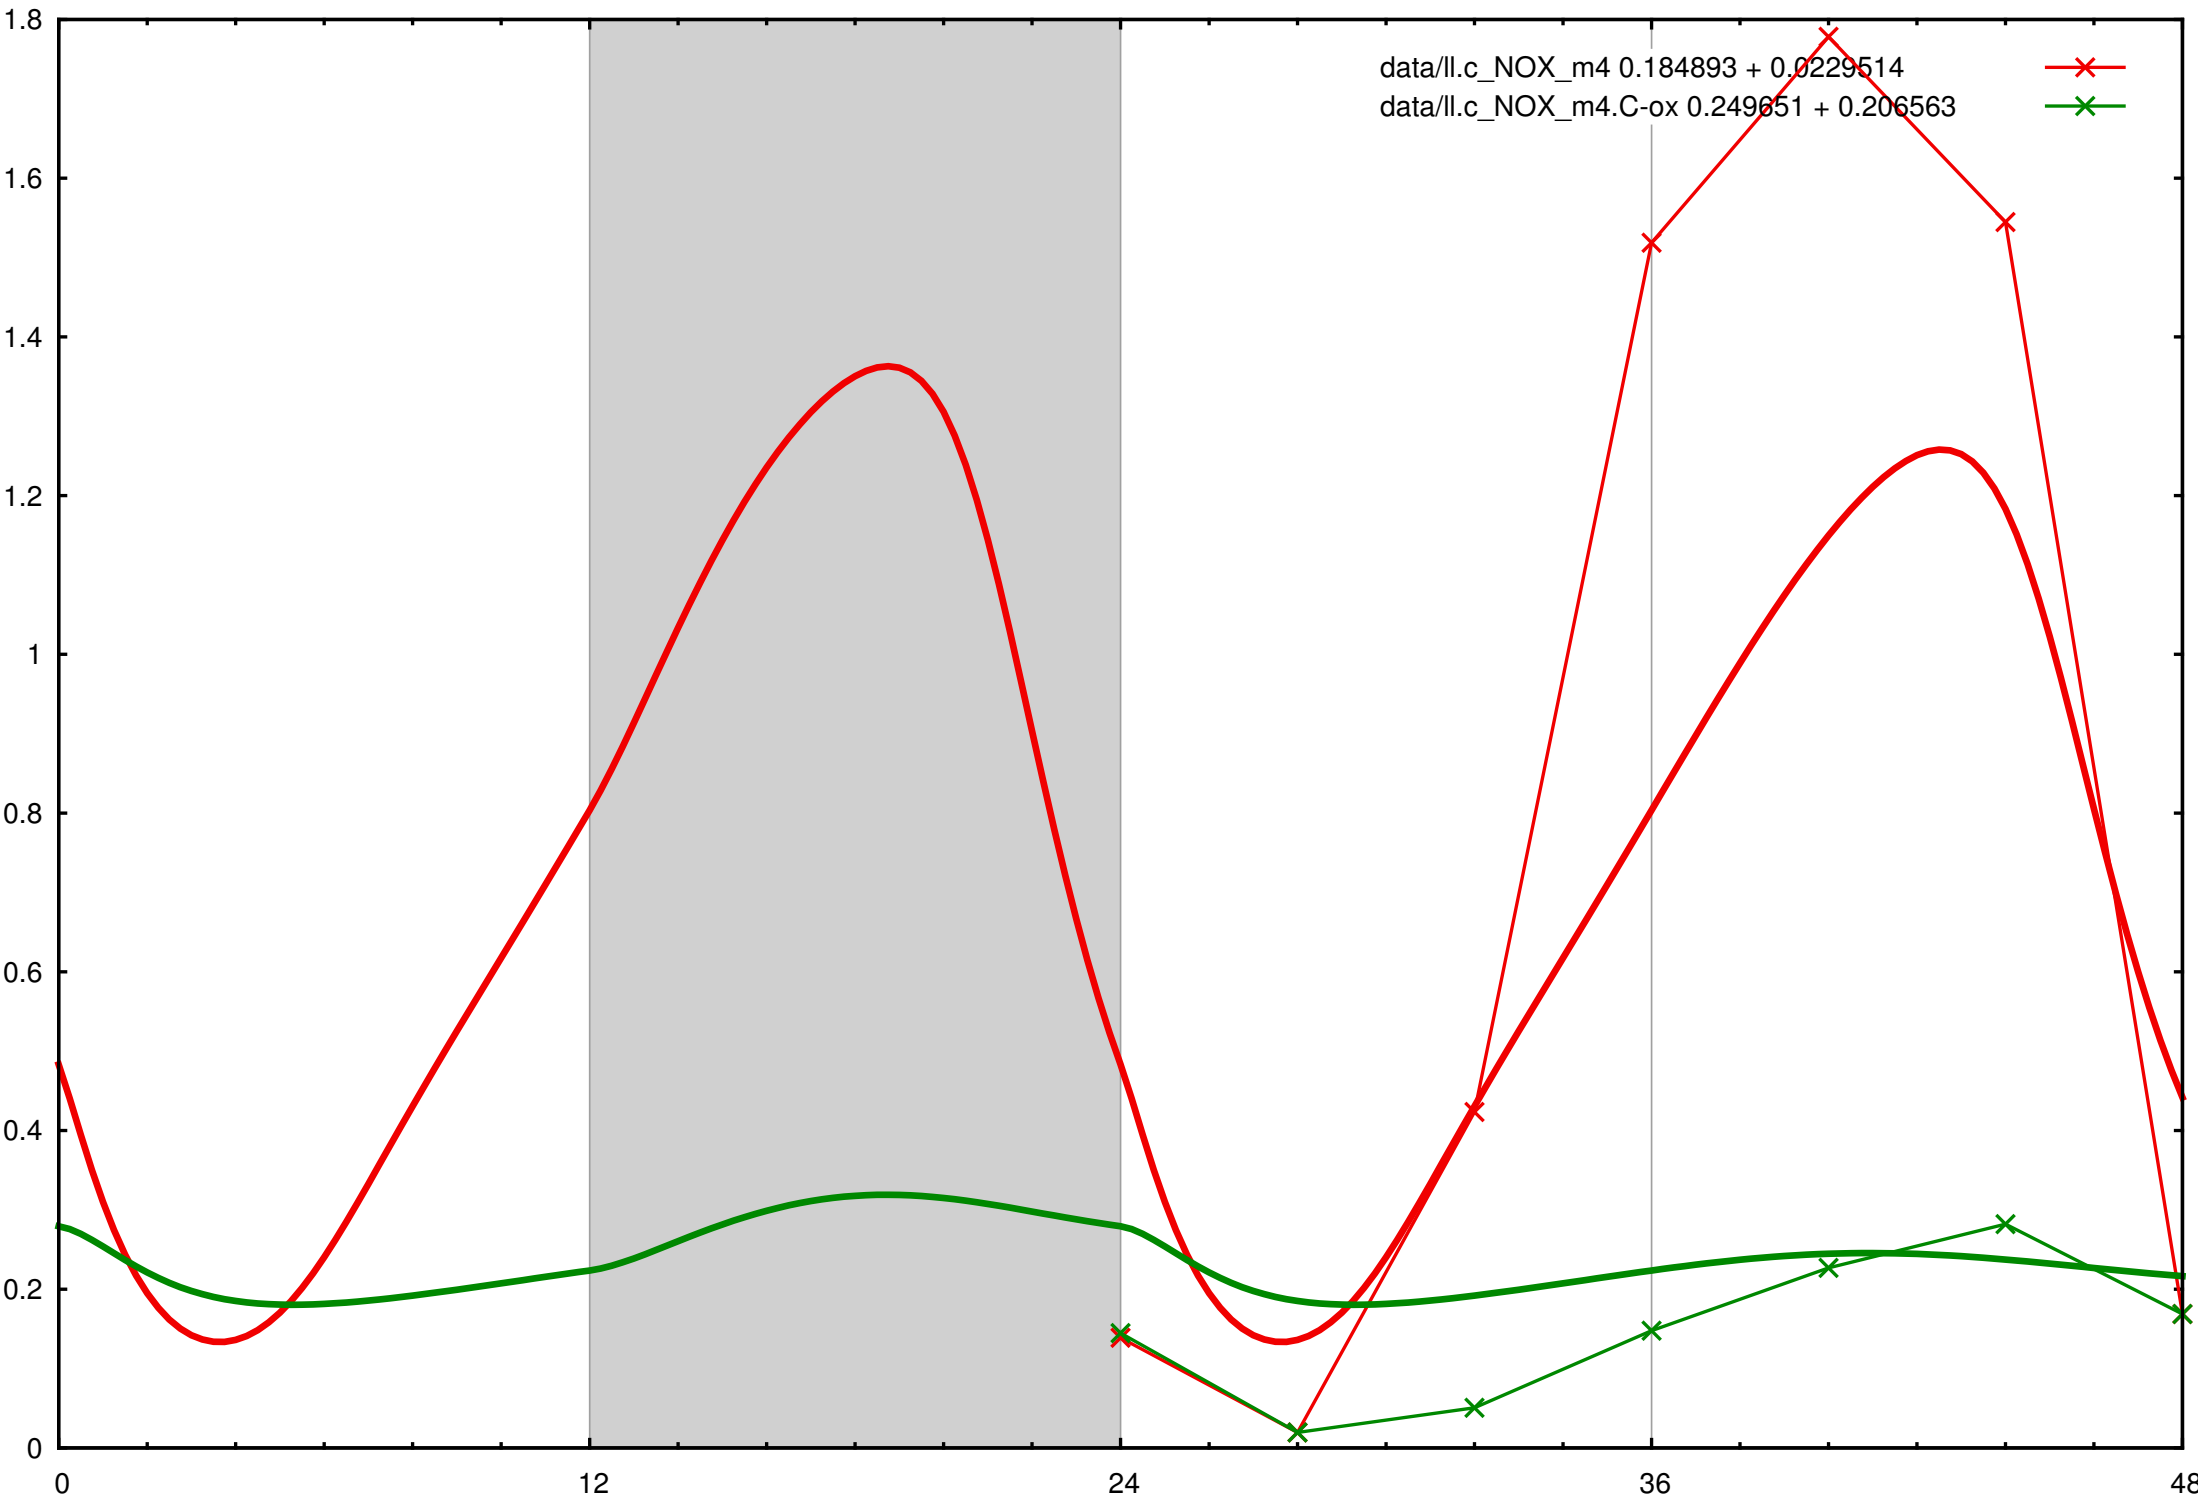

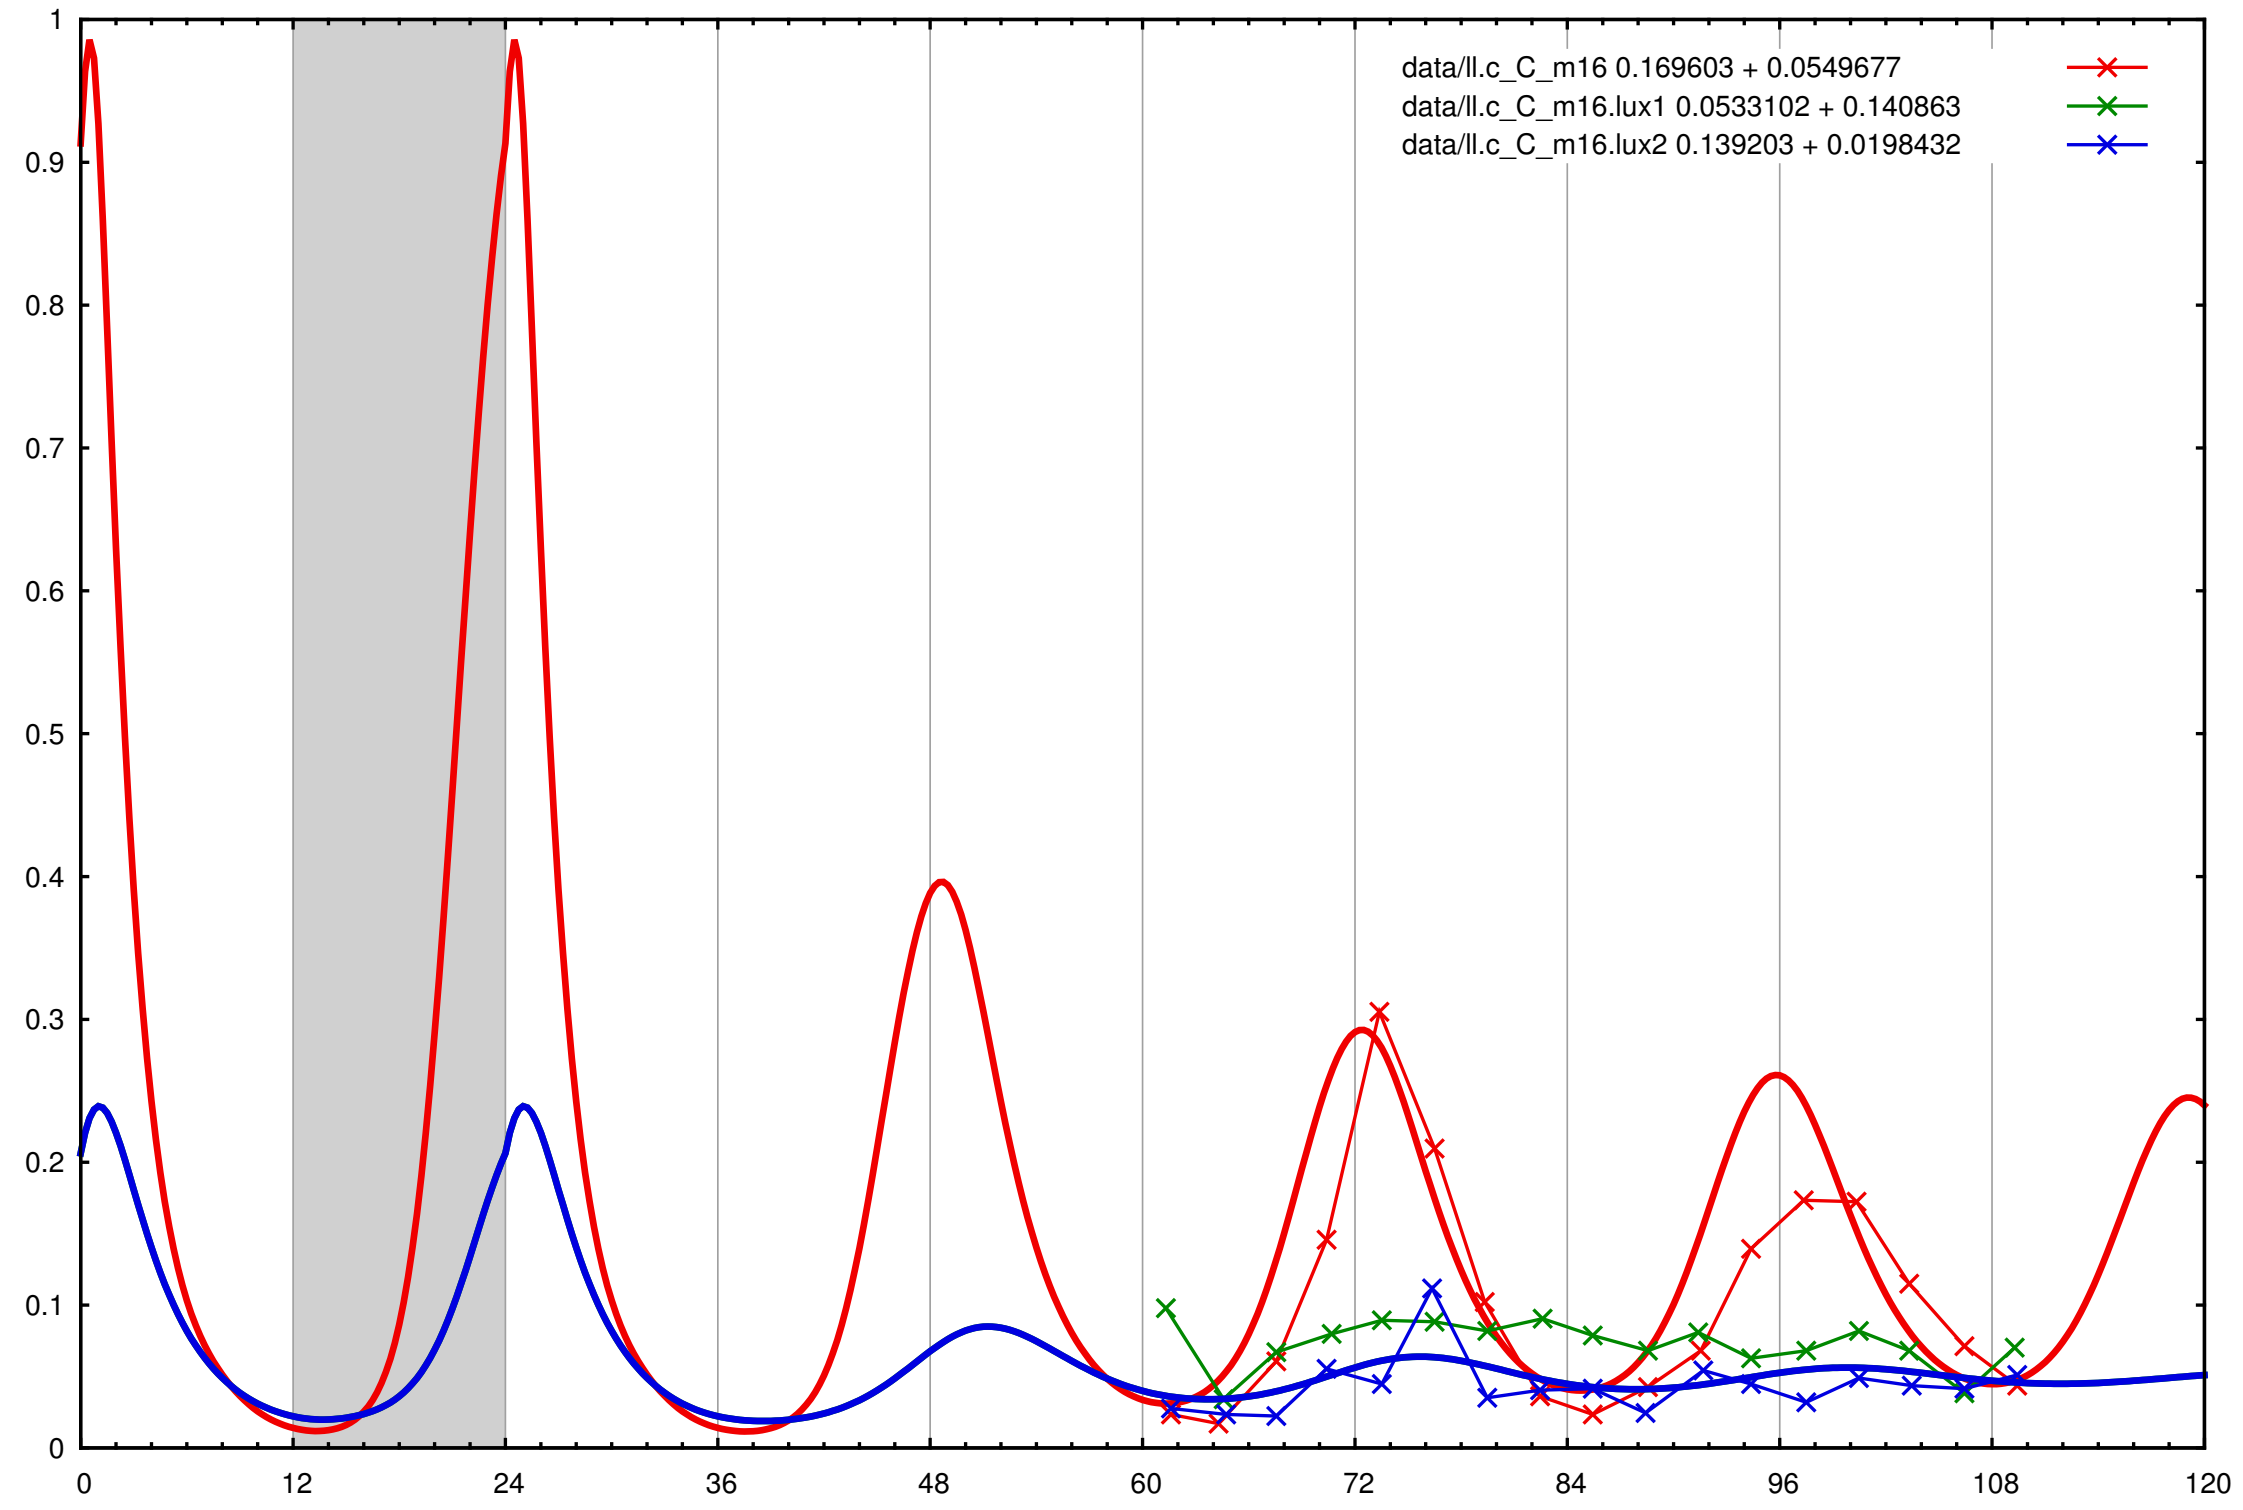

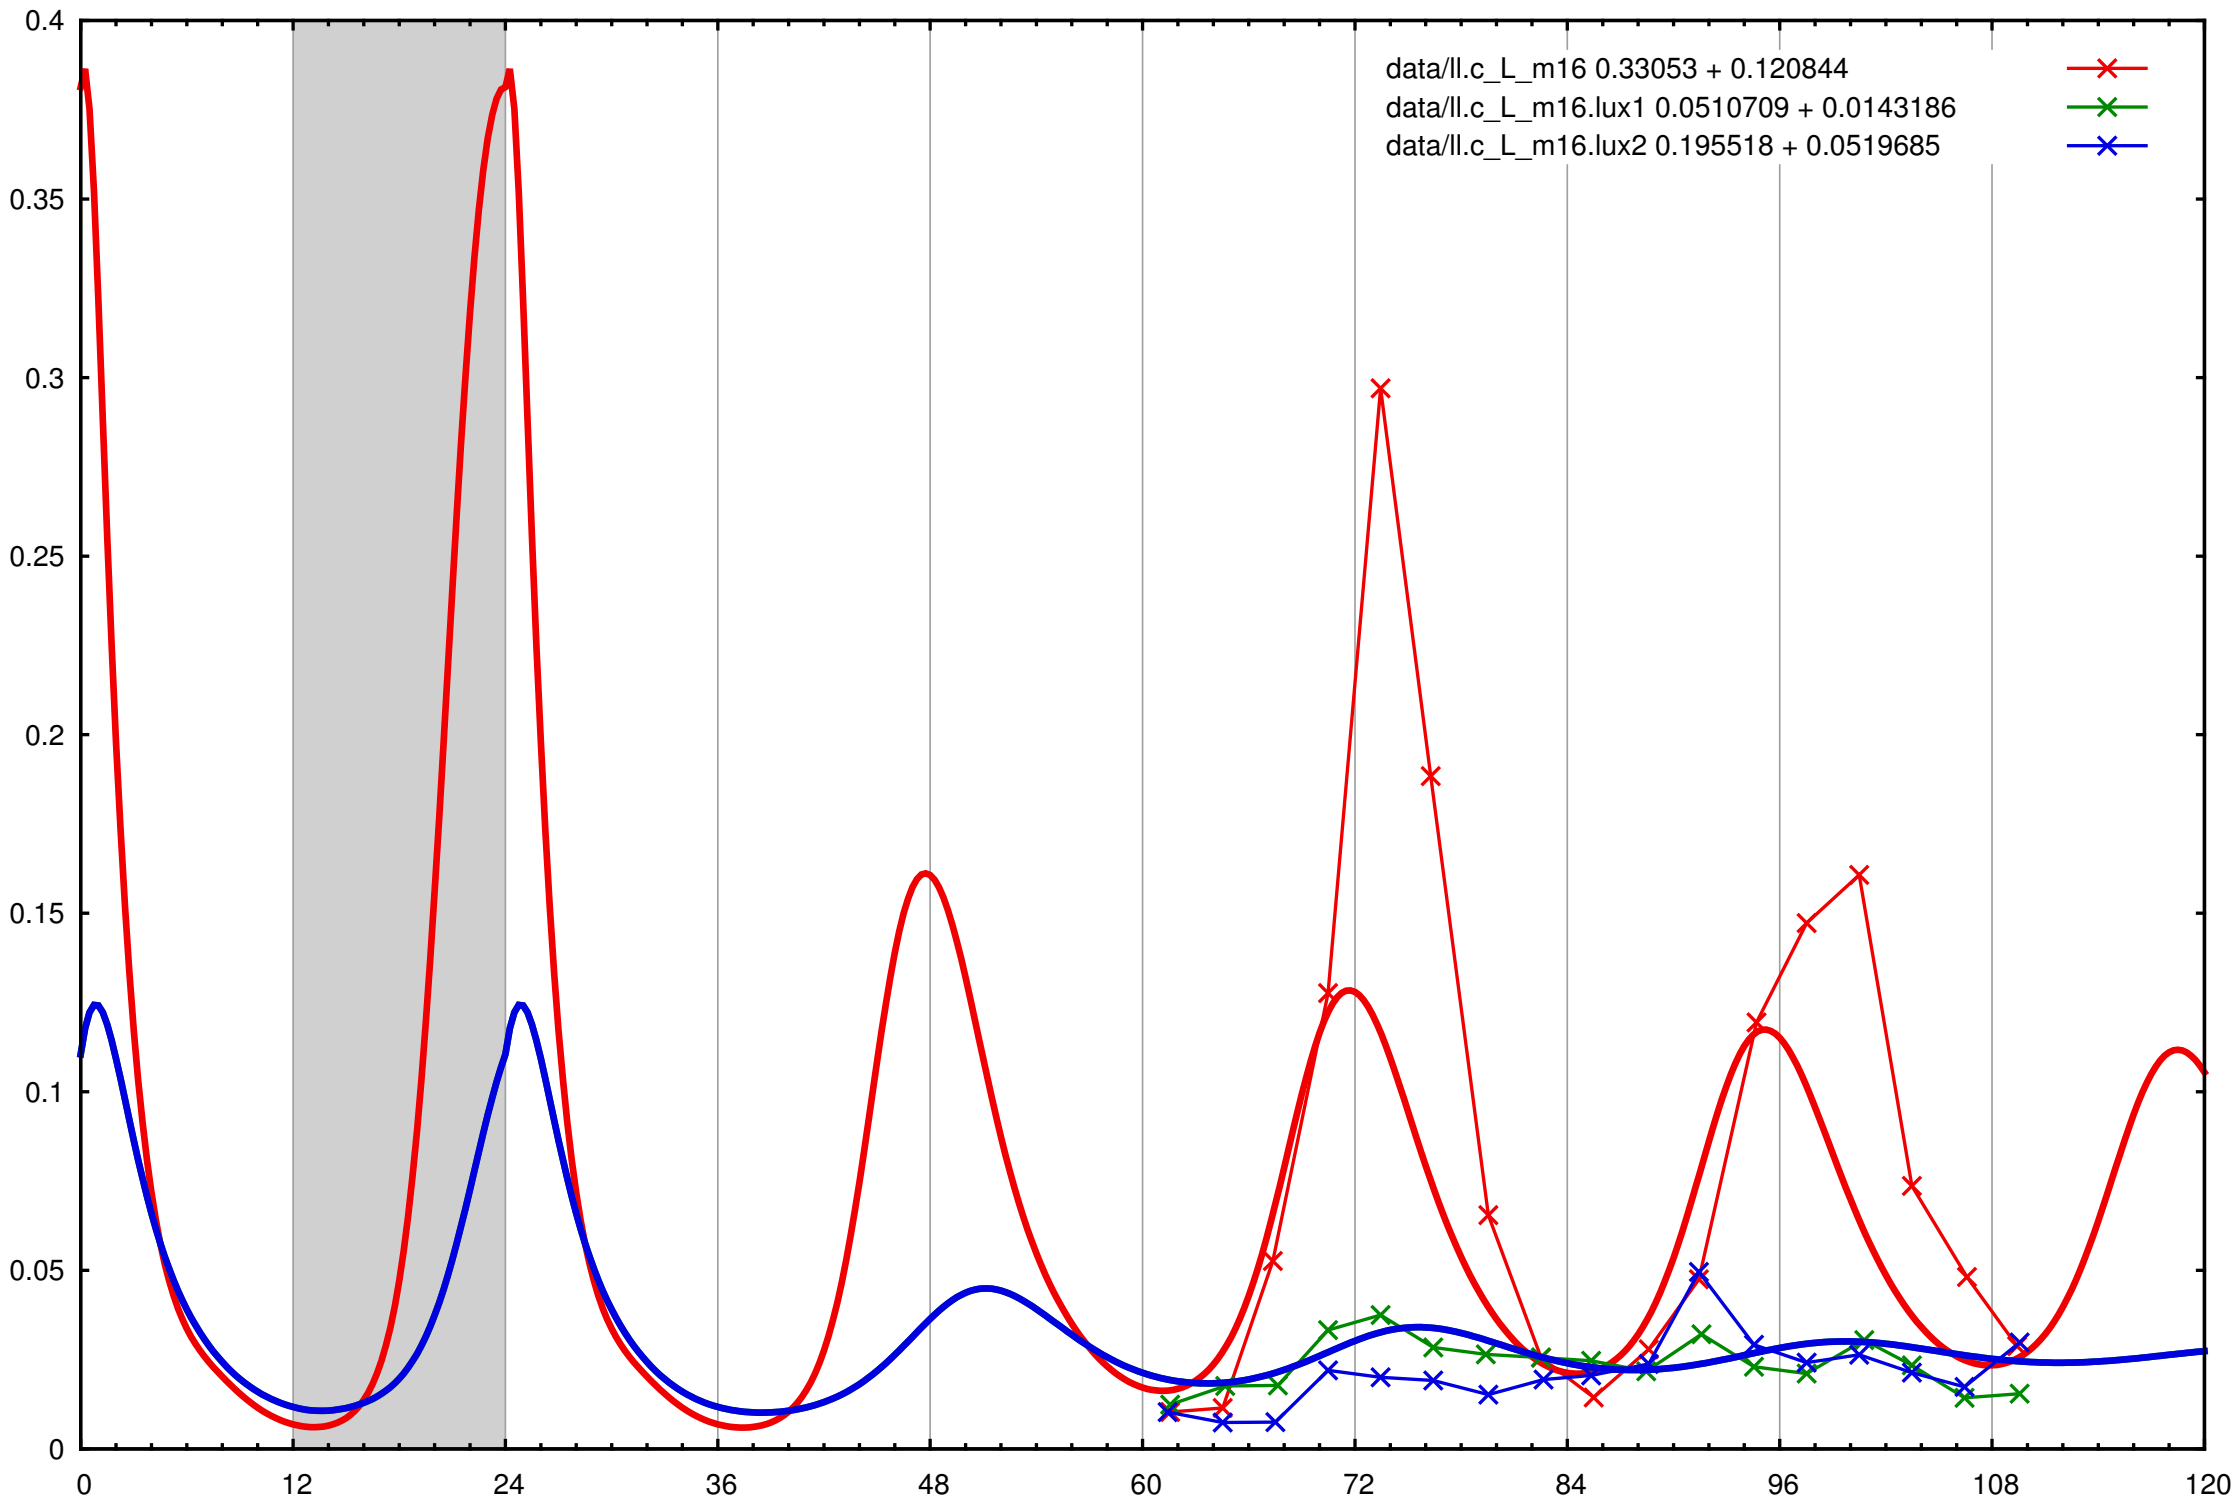



Scale group 153, scost 8.21025e-05

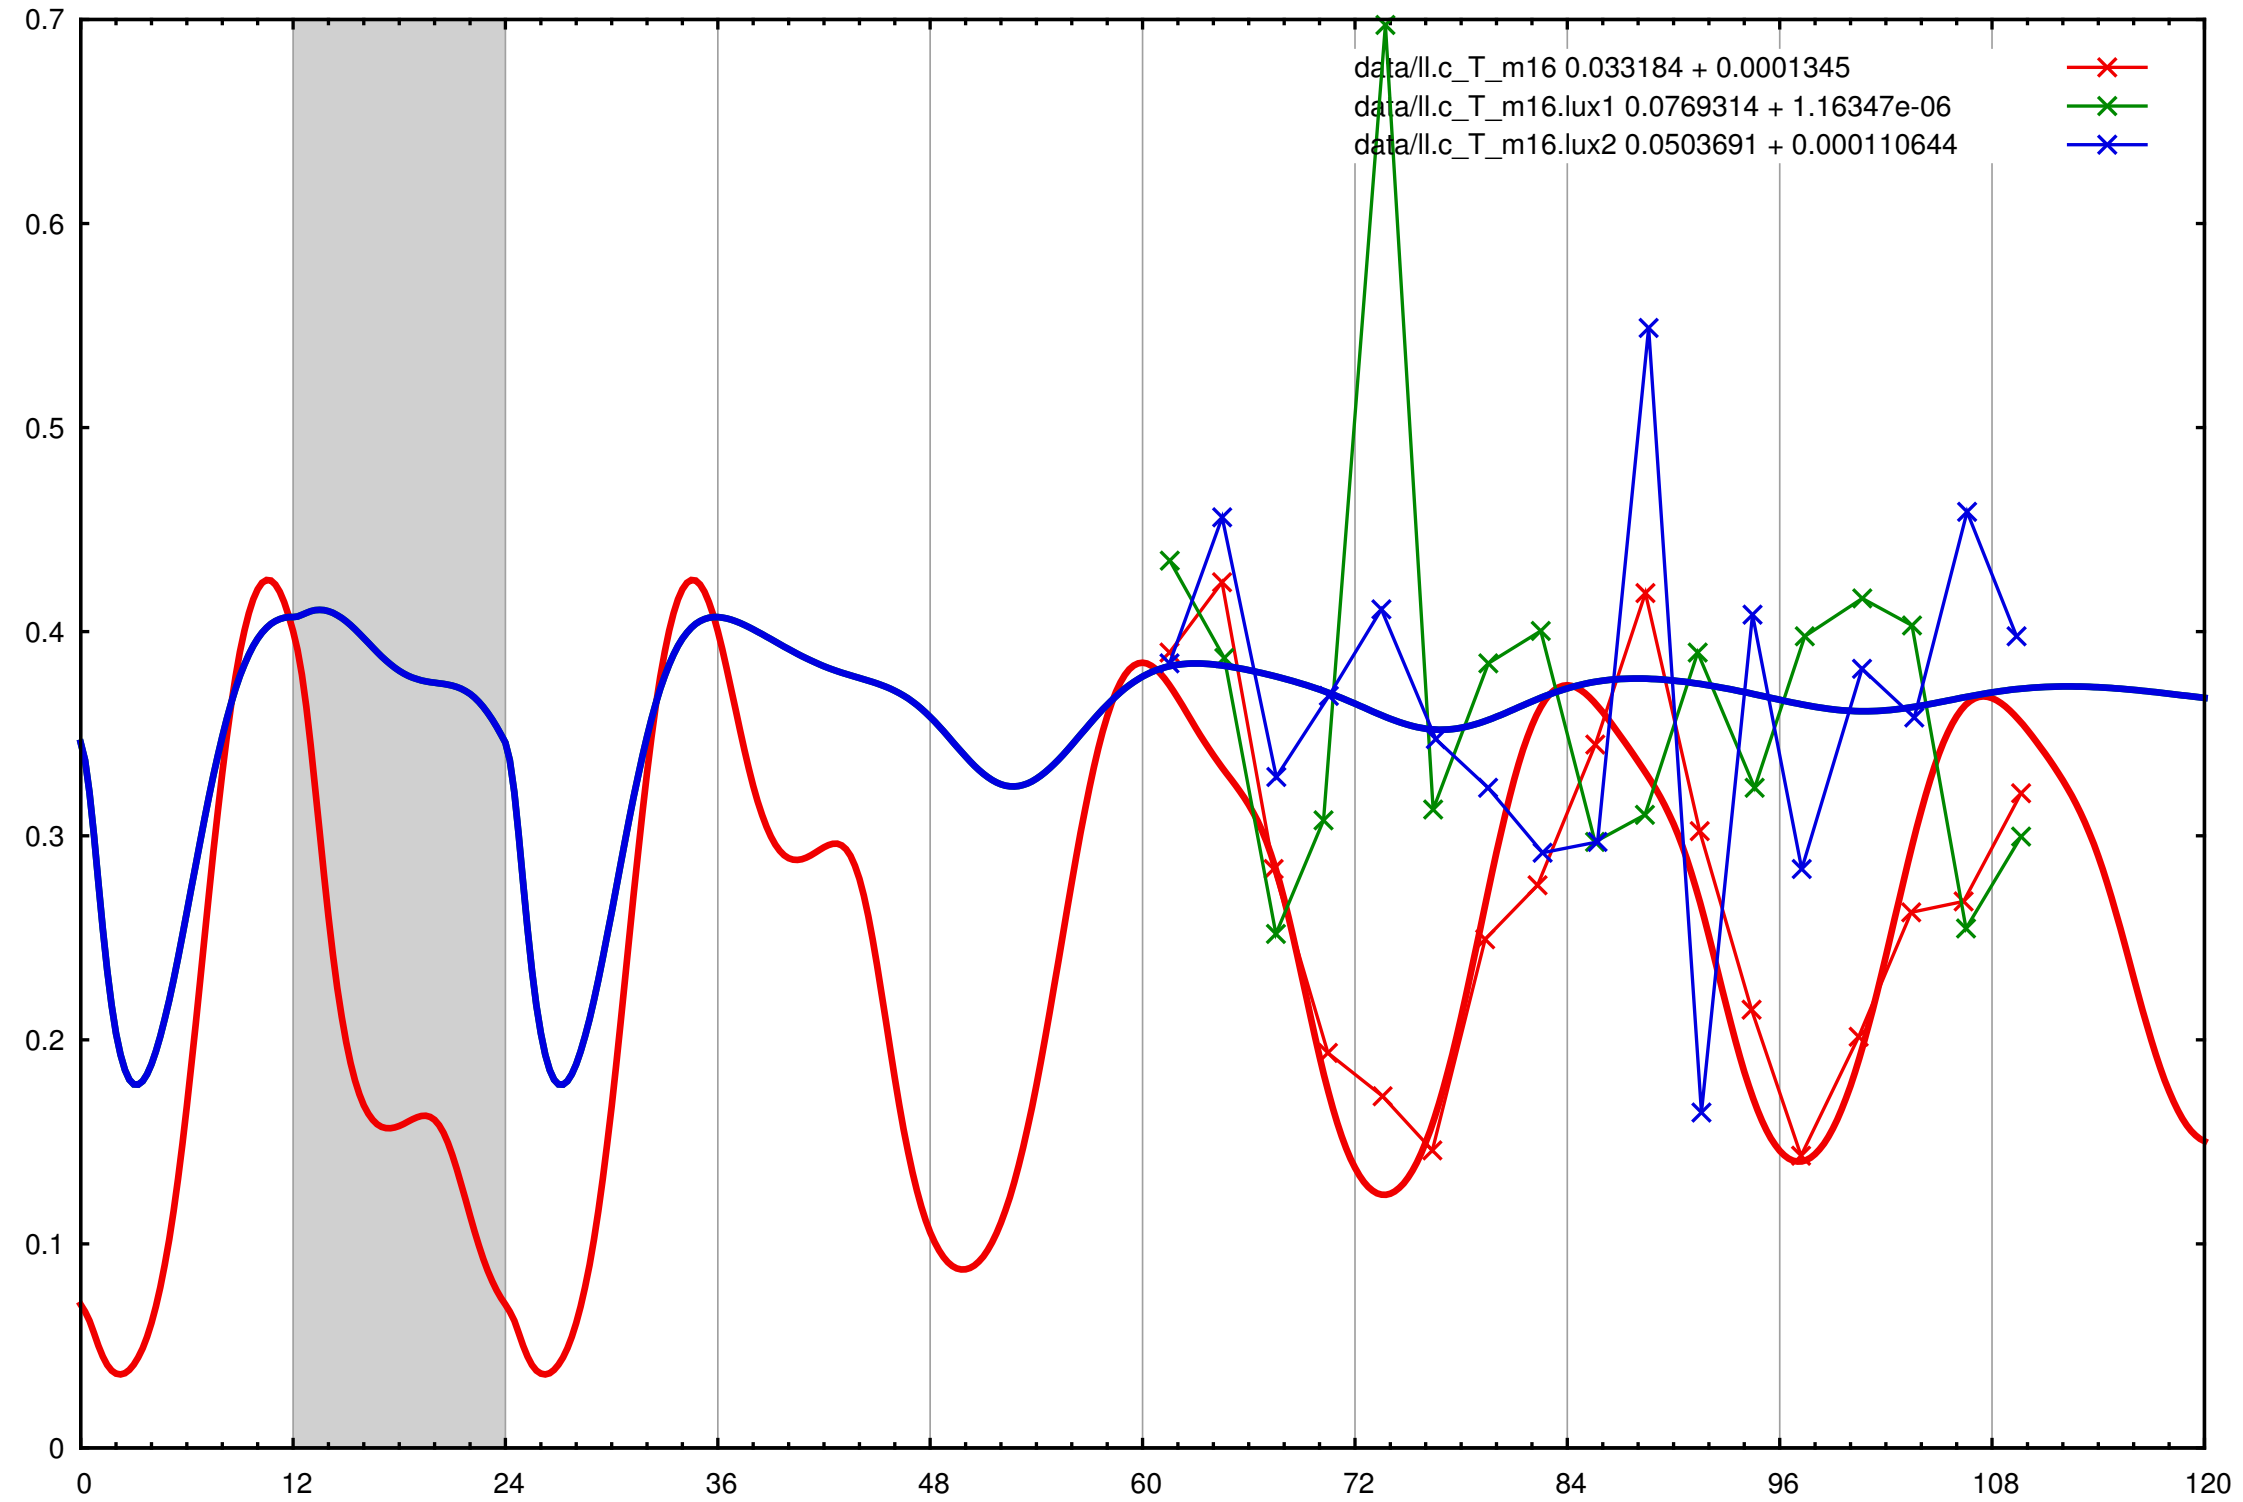

Scale group 154, scost 0.0324891

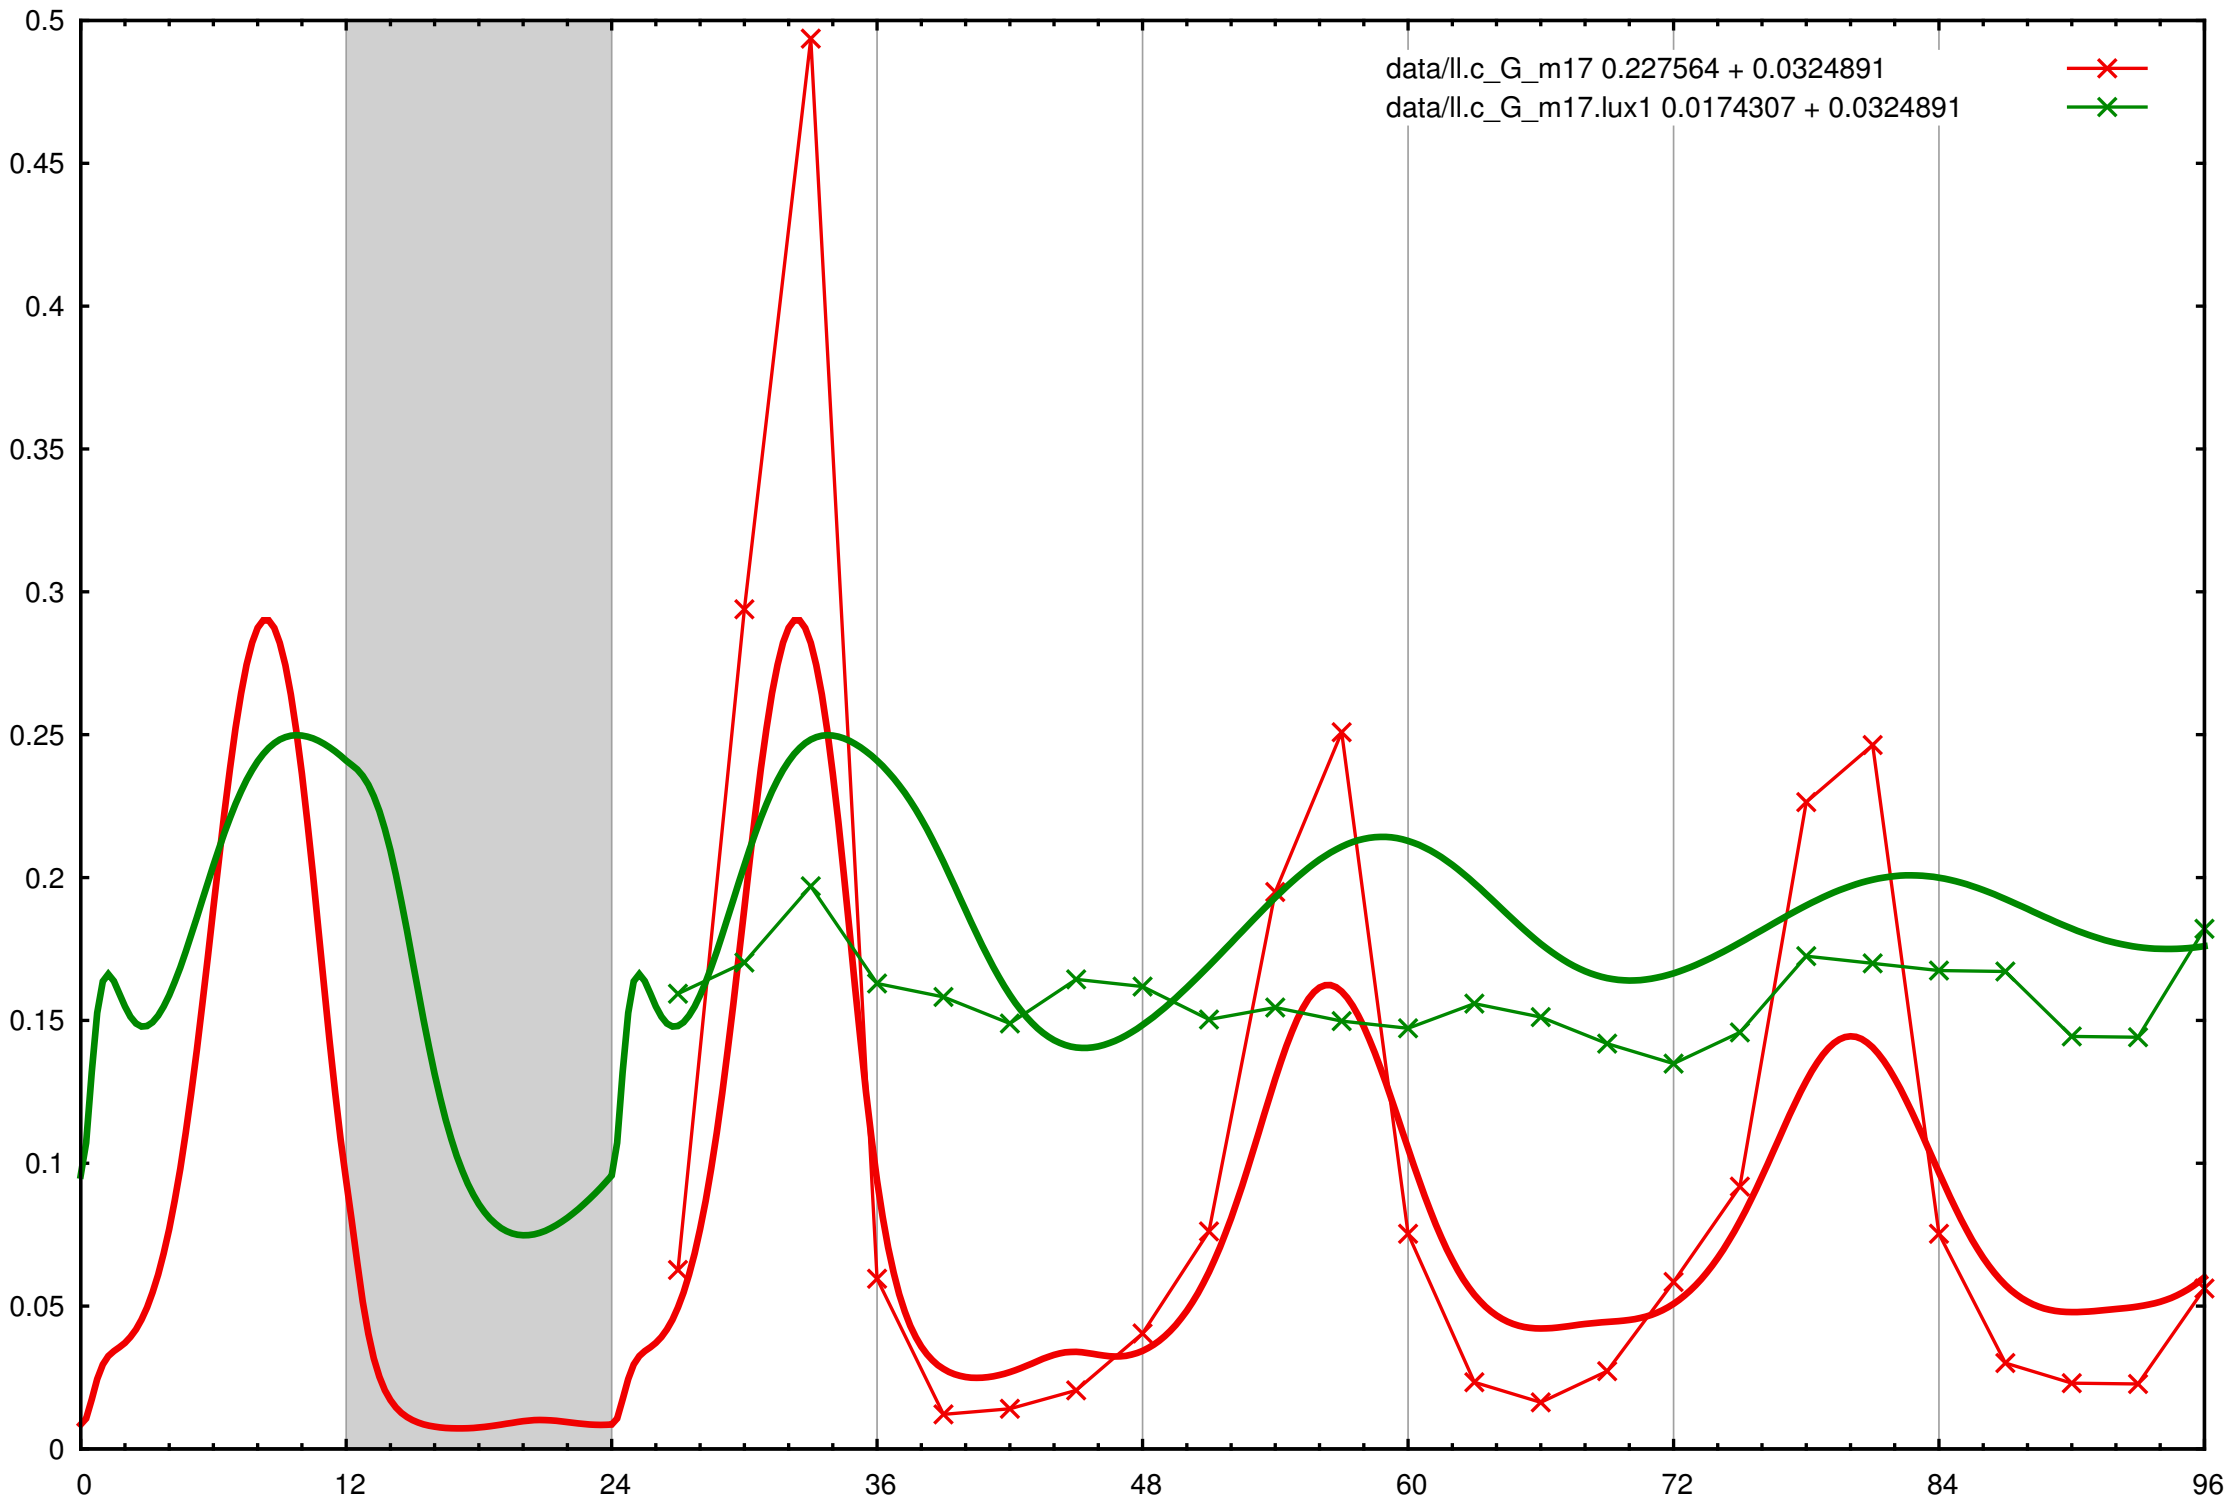

Scale group 155, scost 0.000593322

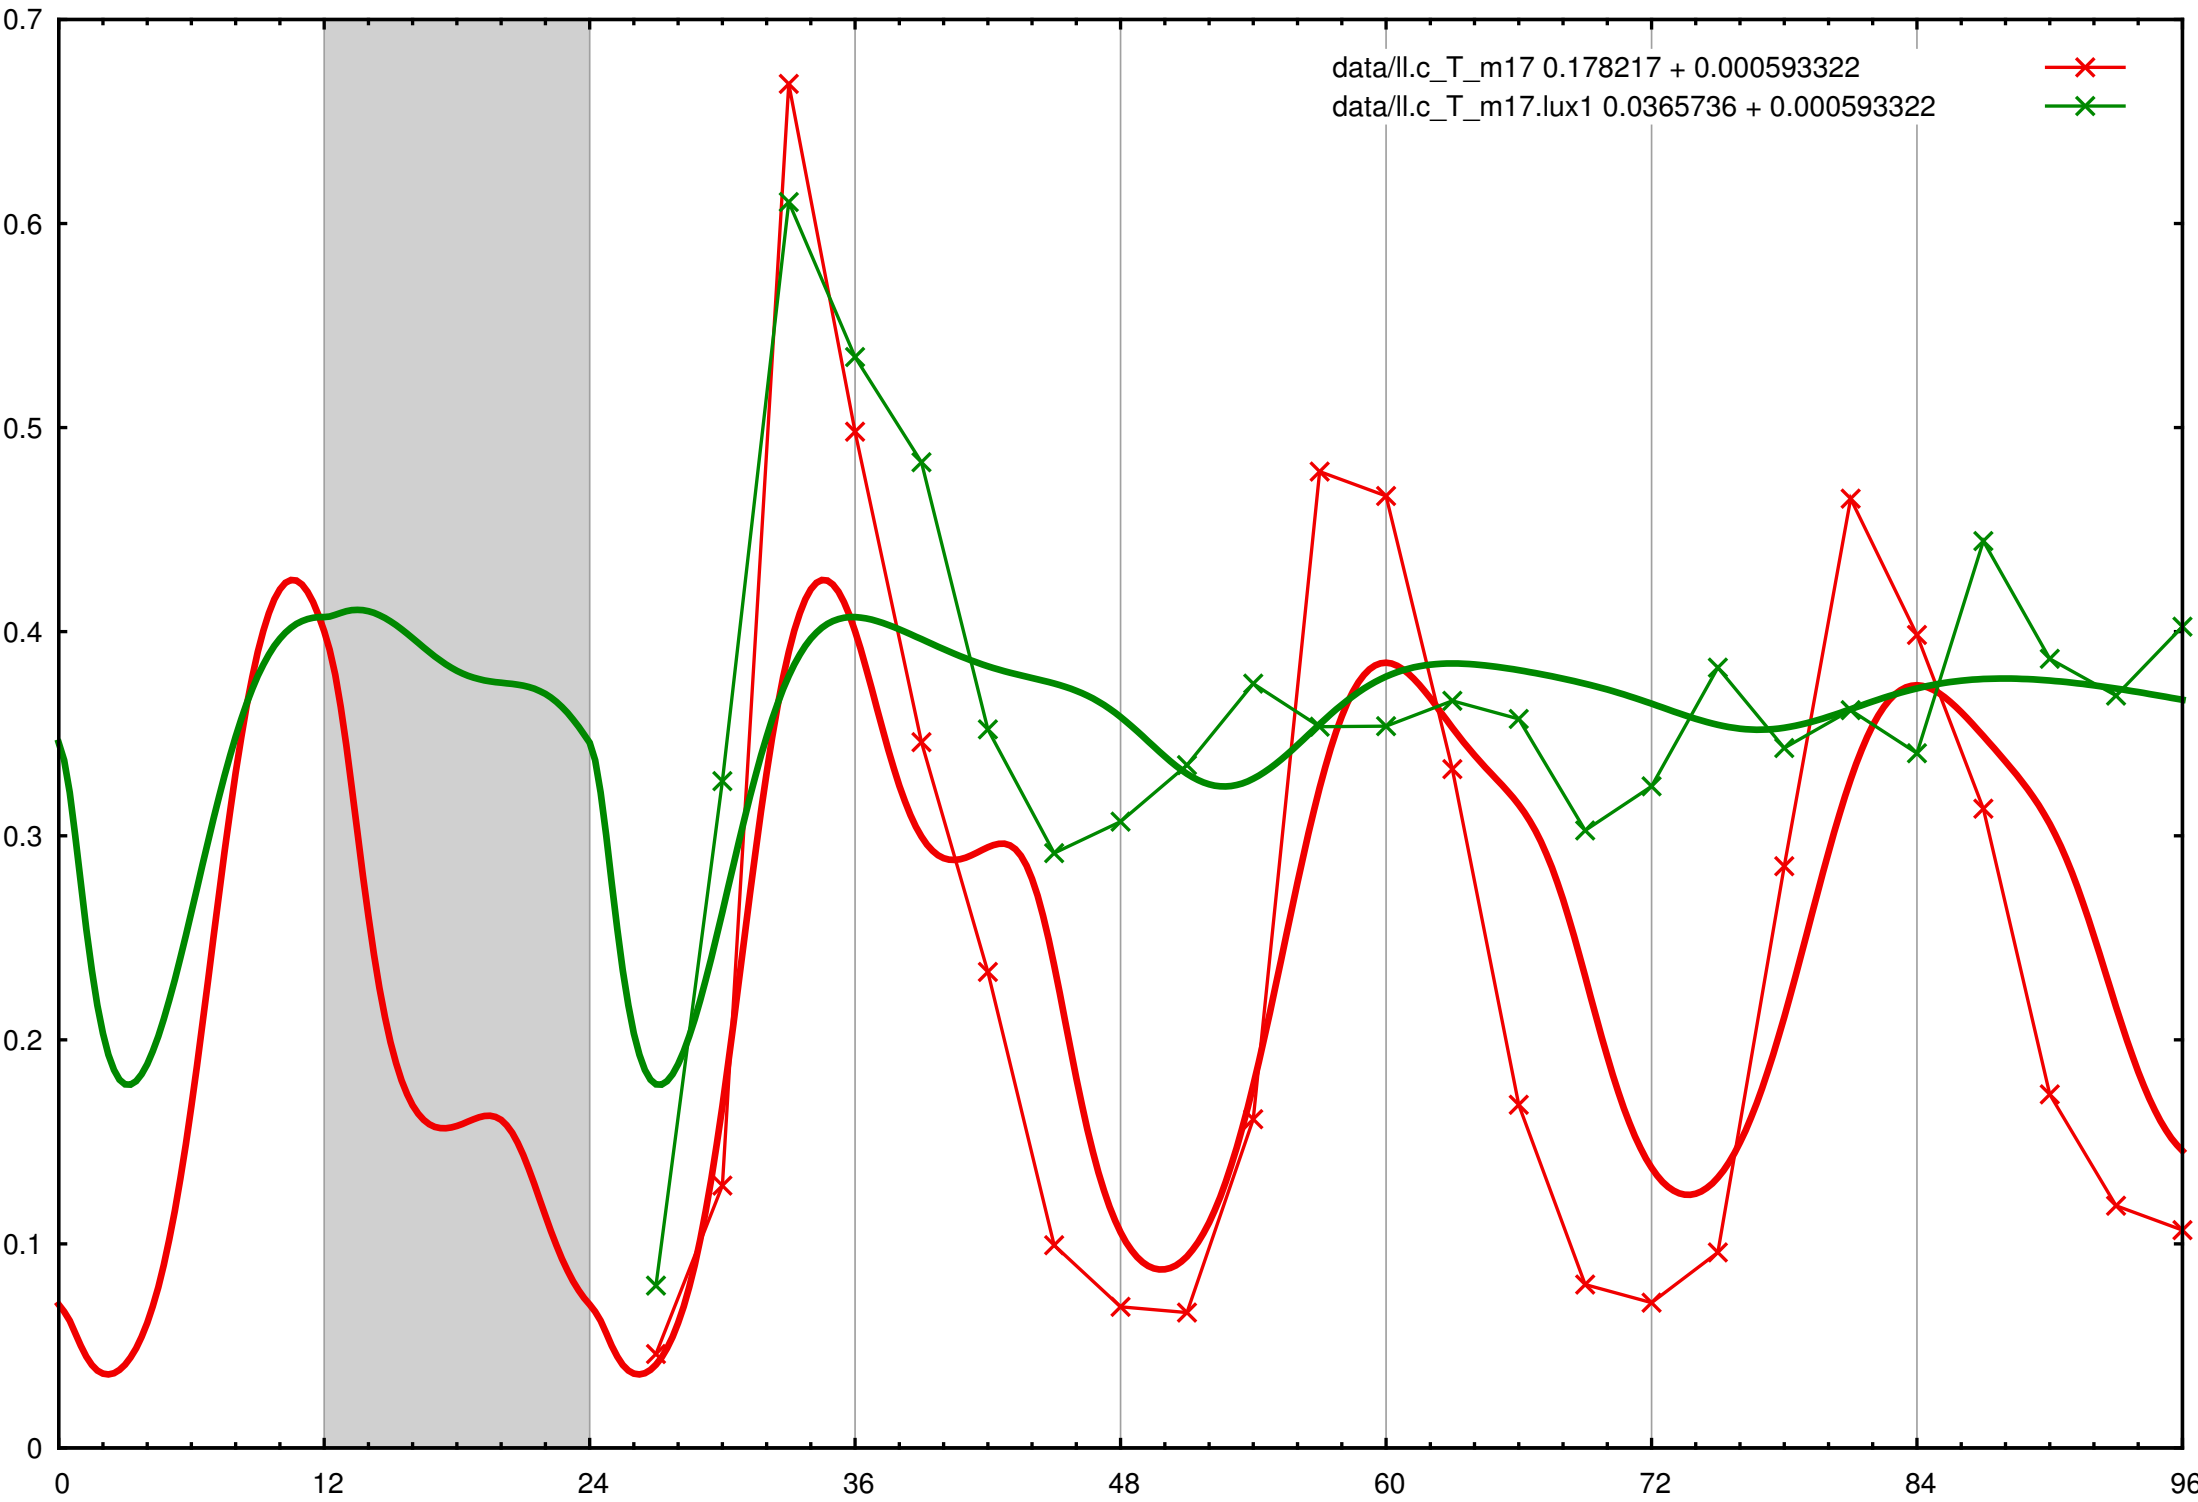

Scale group 156, scost 0.523717

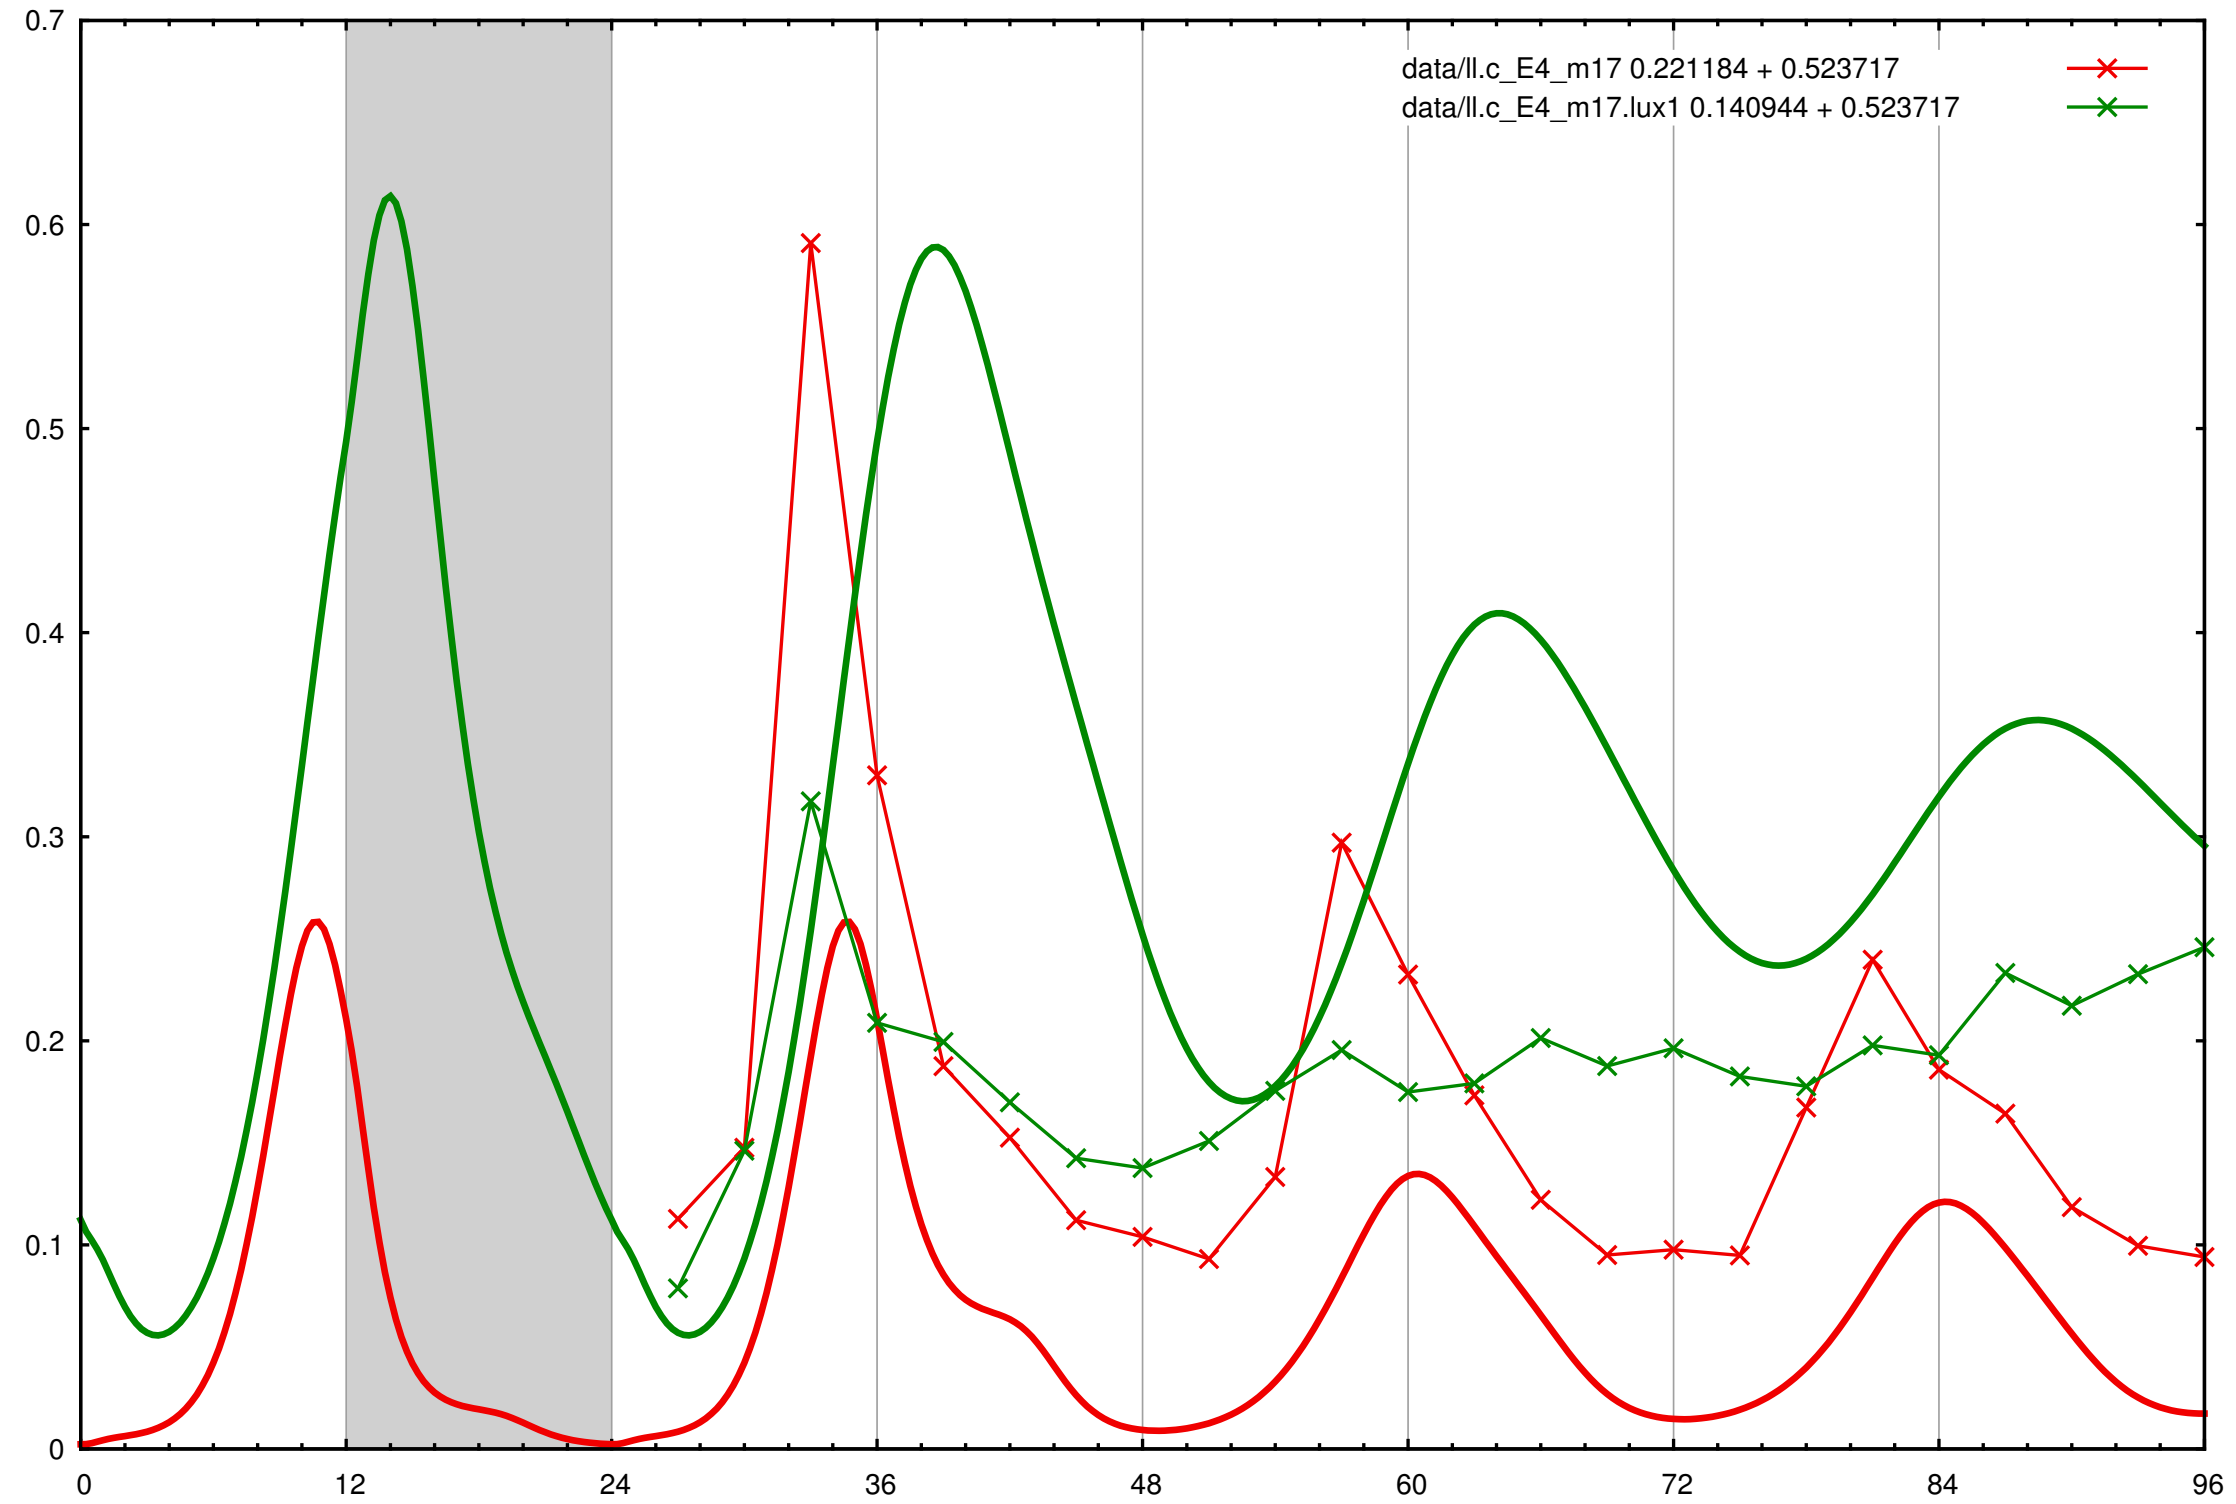

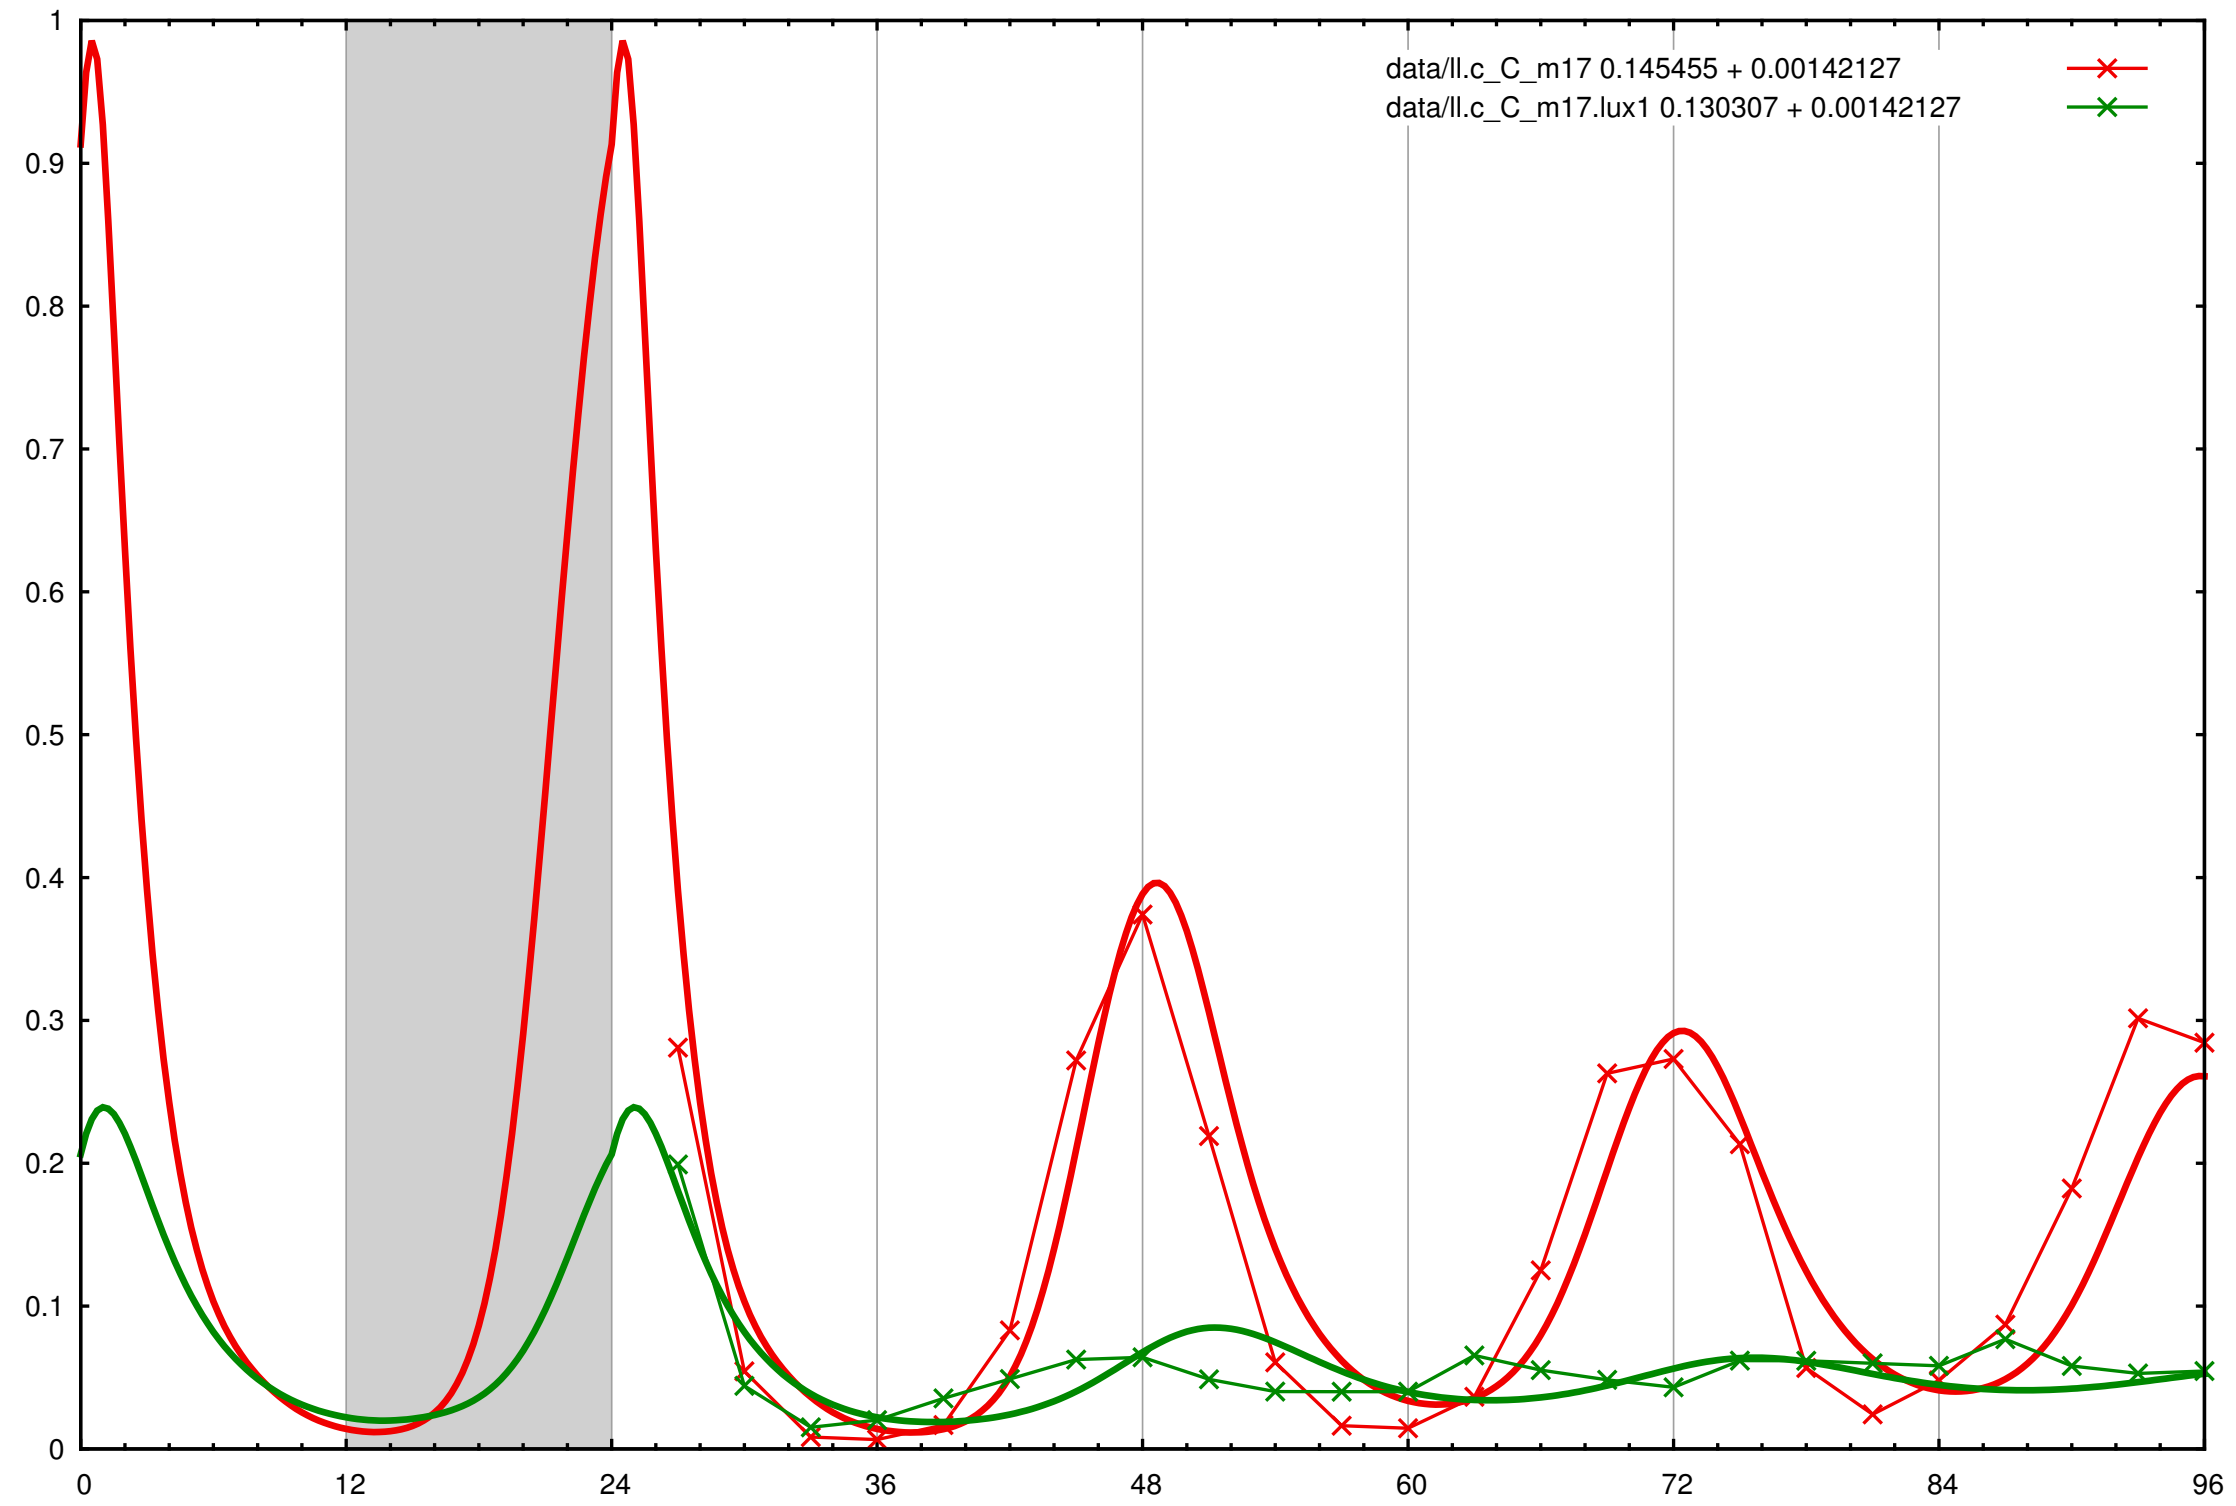

Scale group 158, scost 0.597649

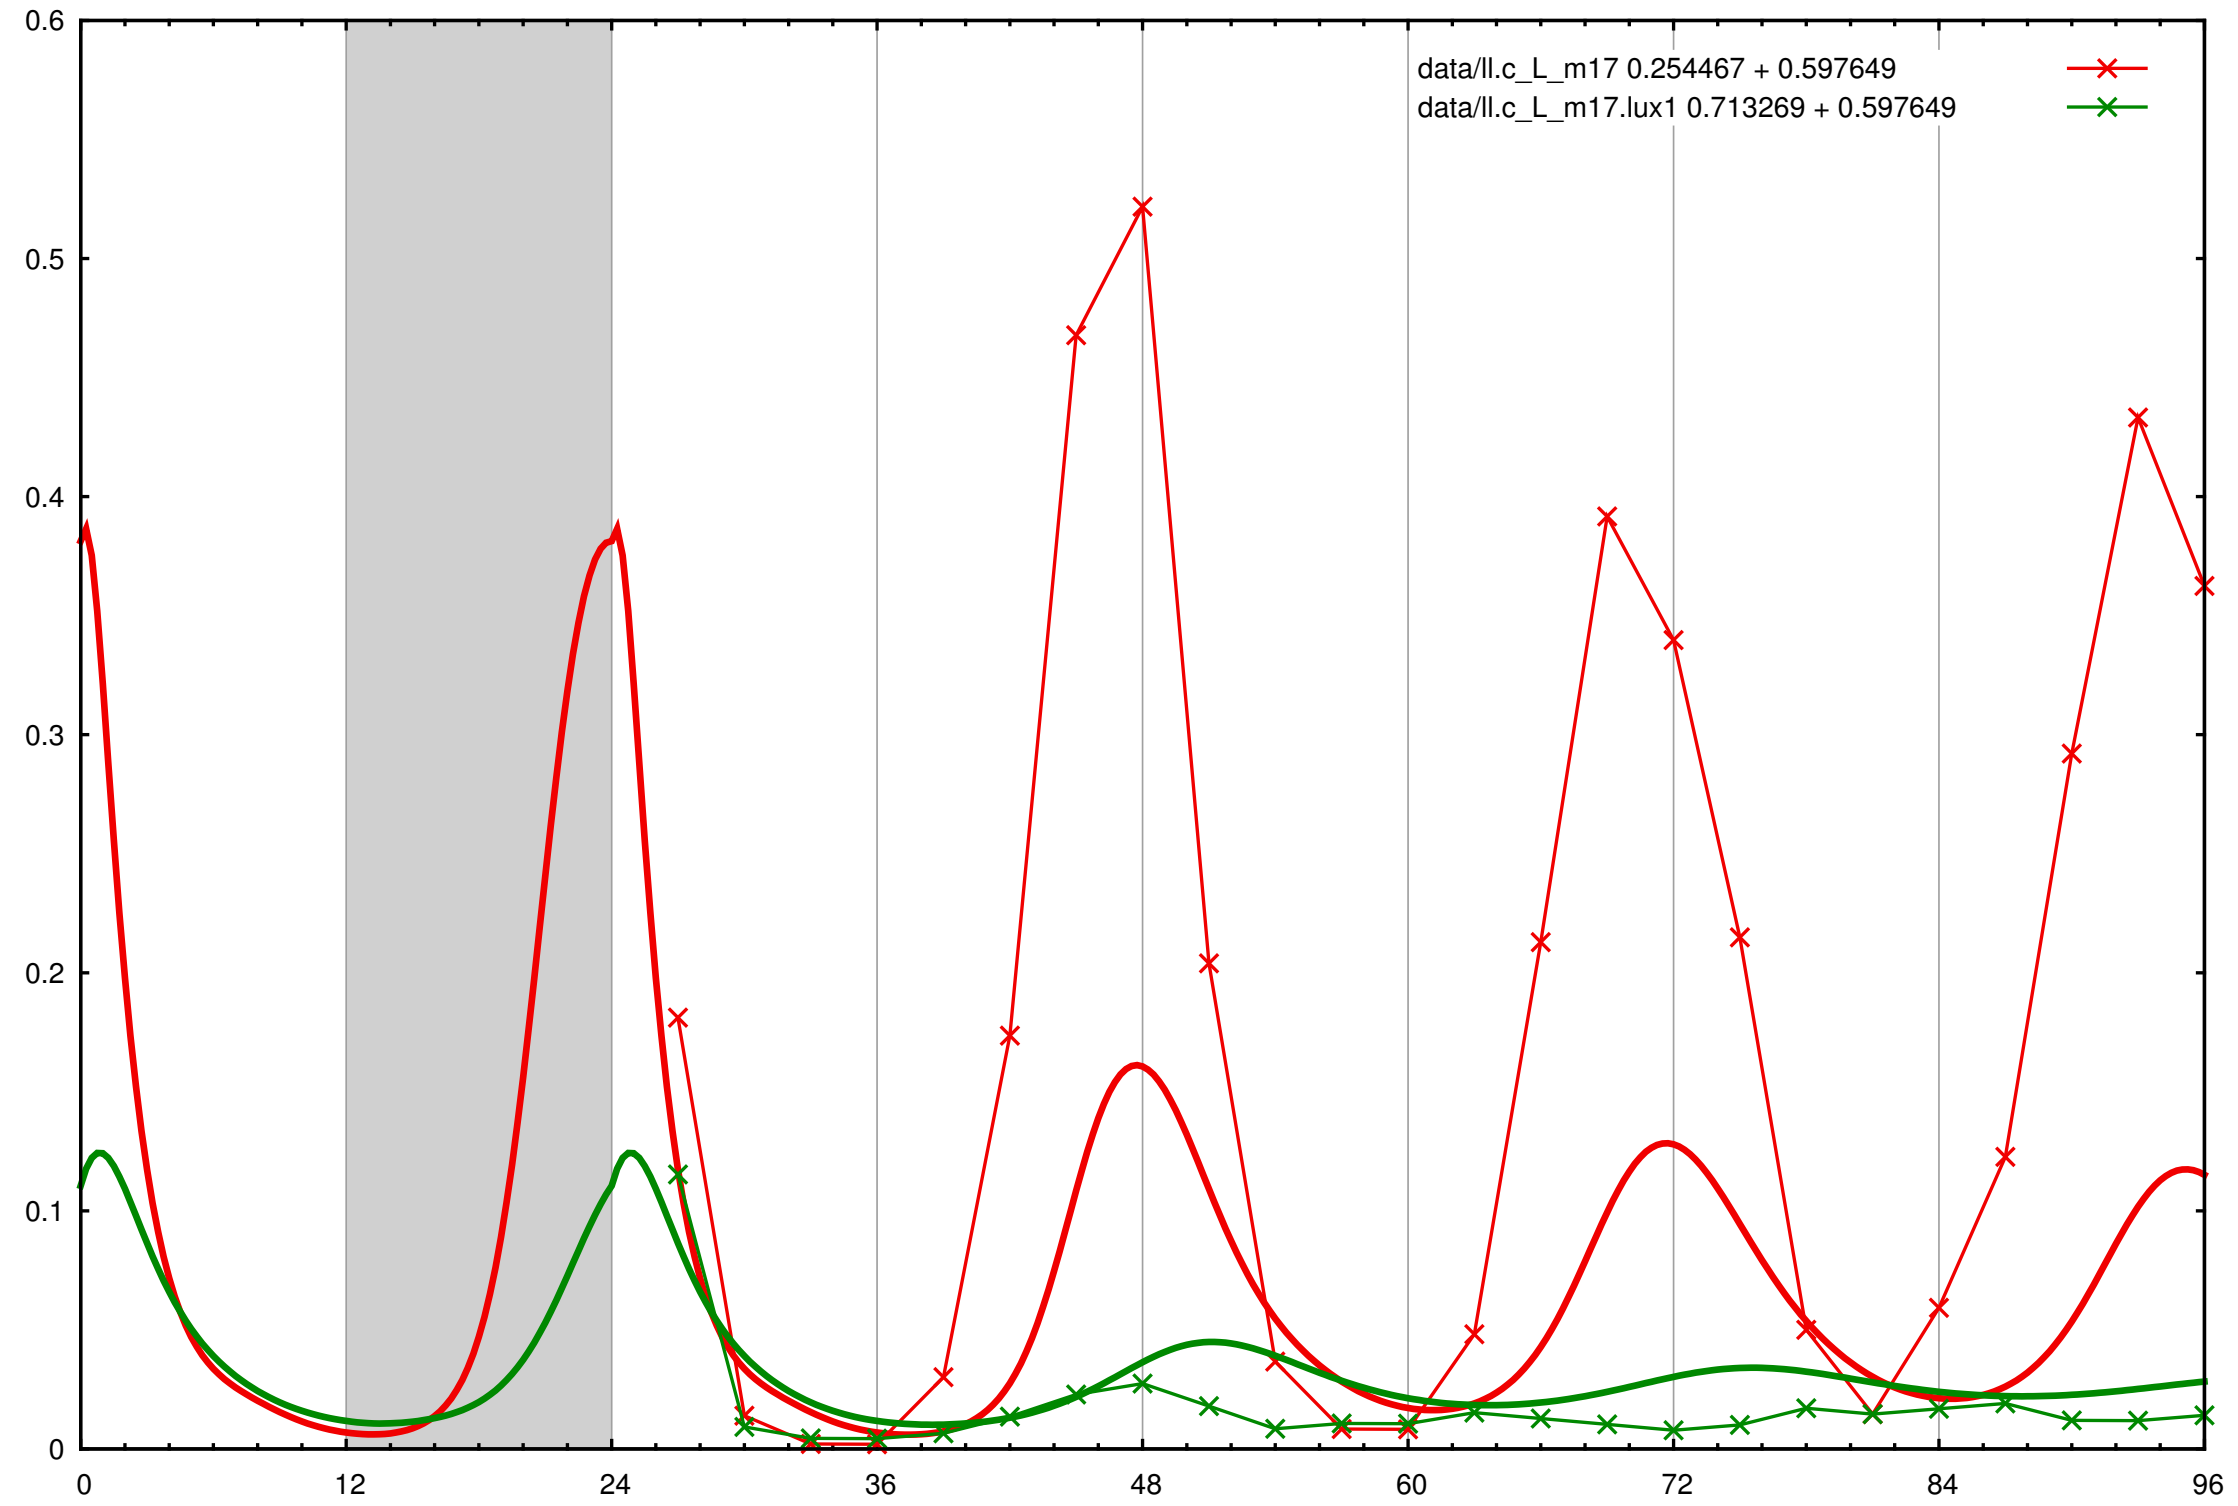

Scale group 159, scost 0.0498983

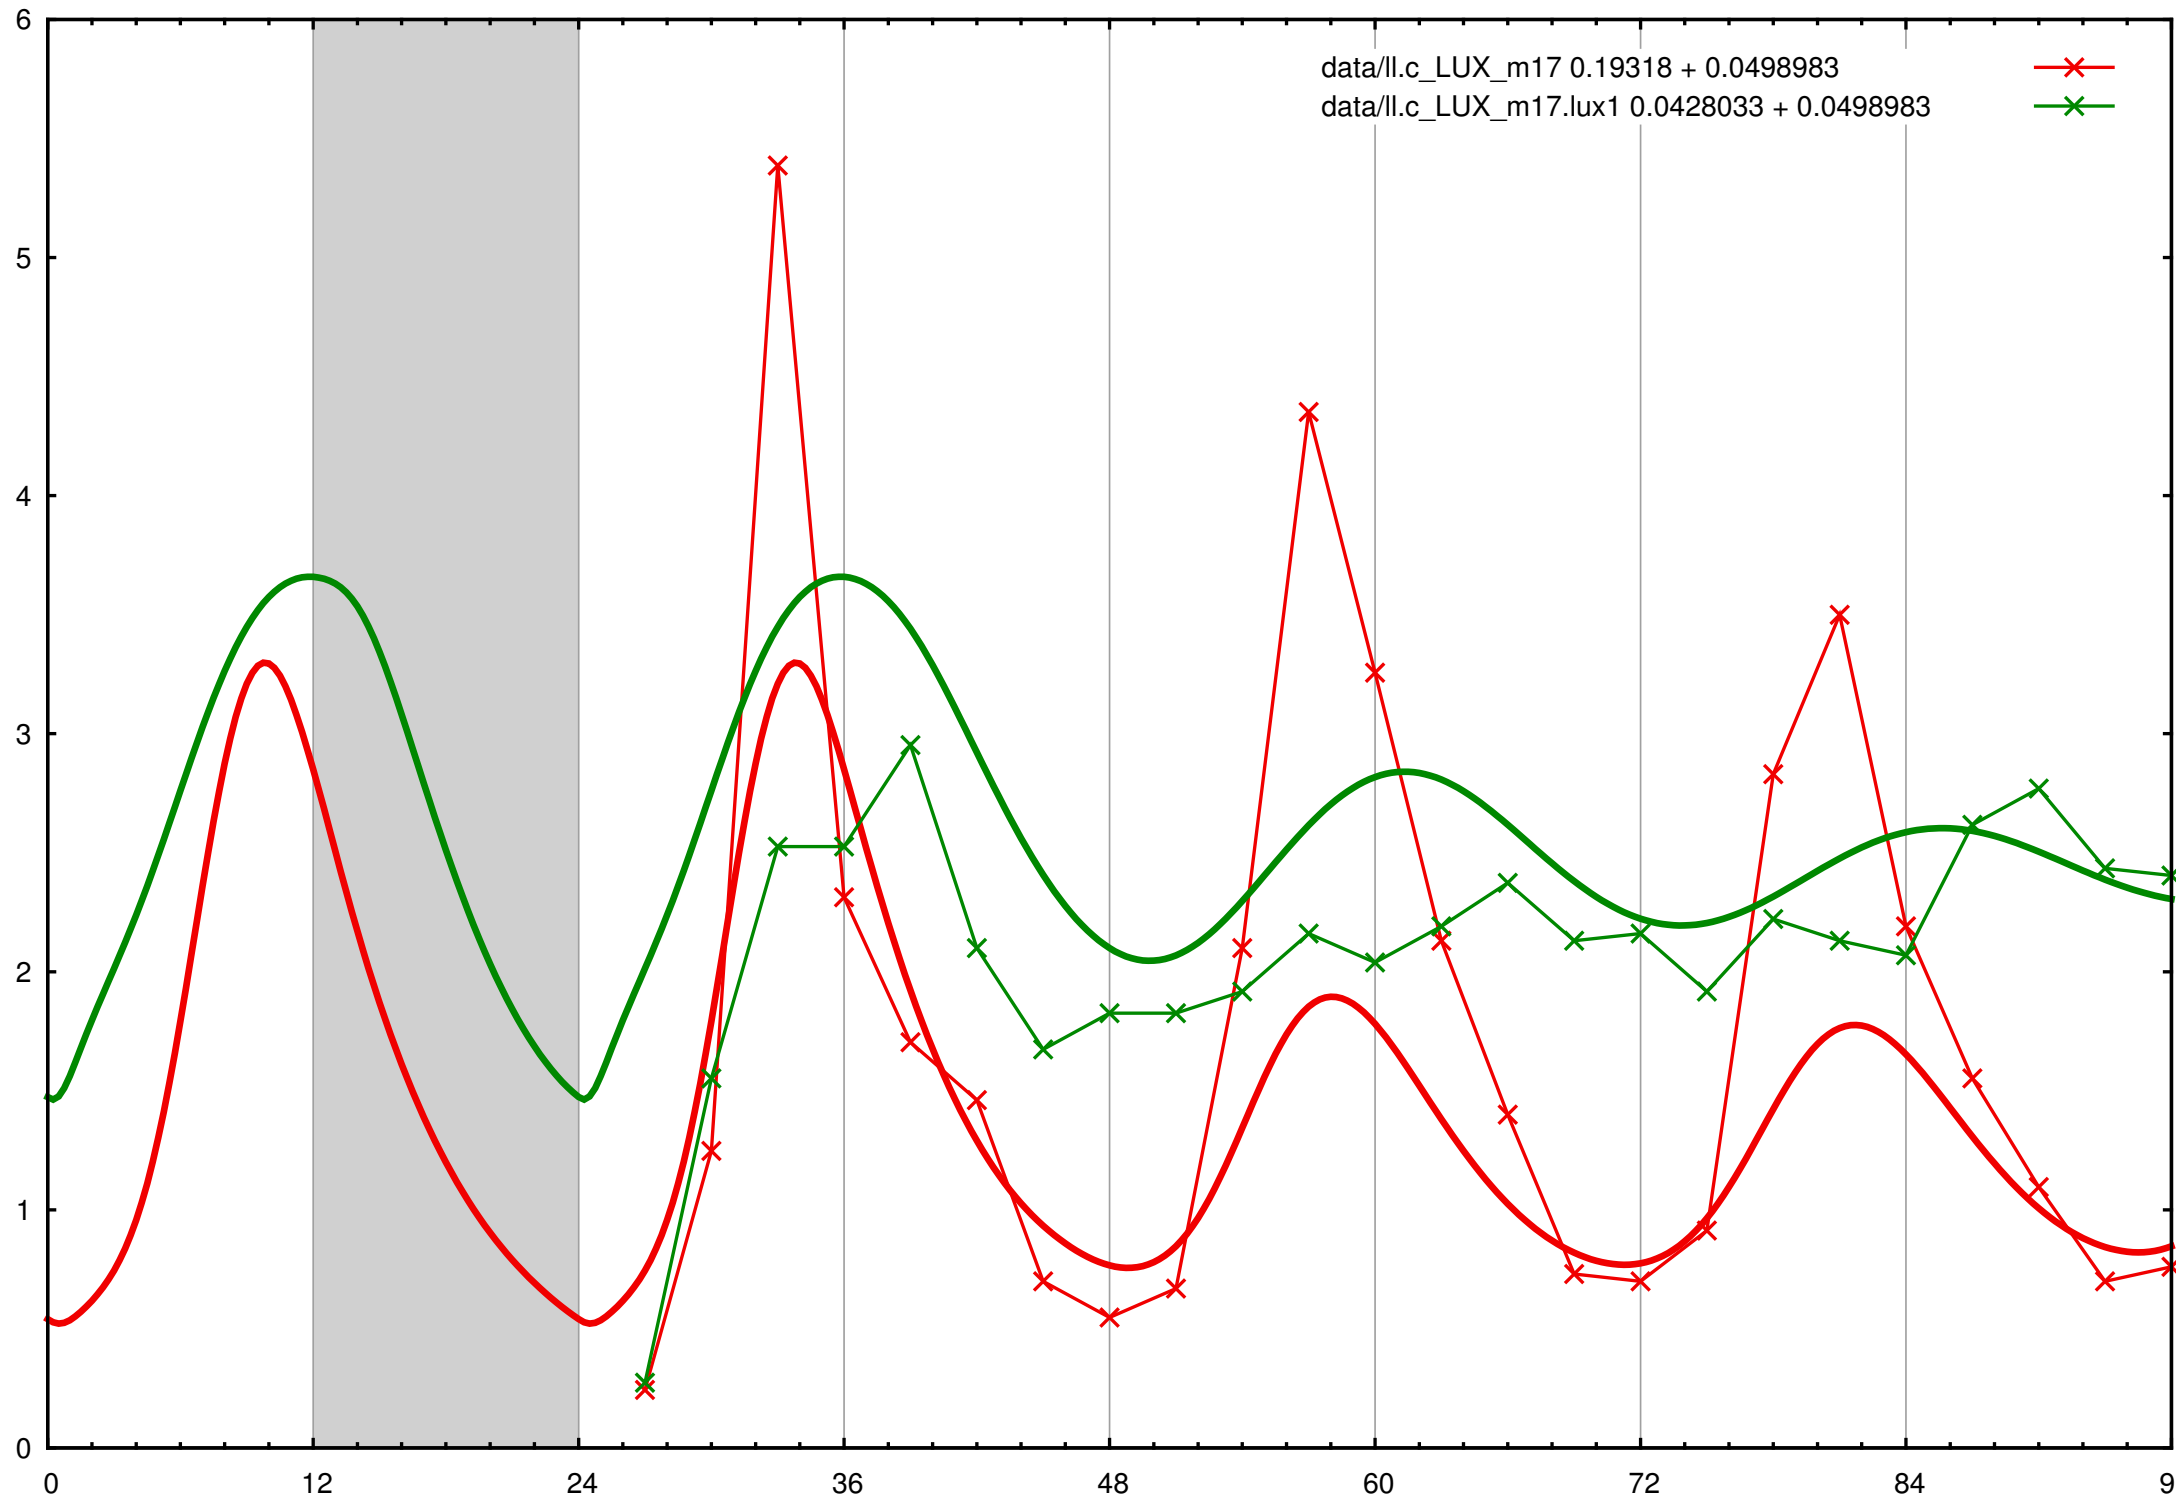

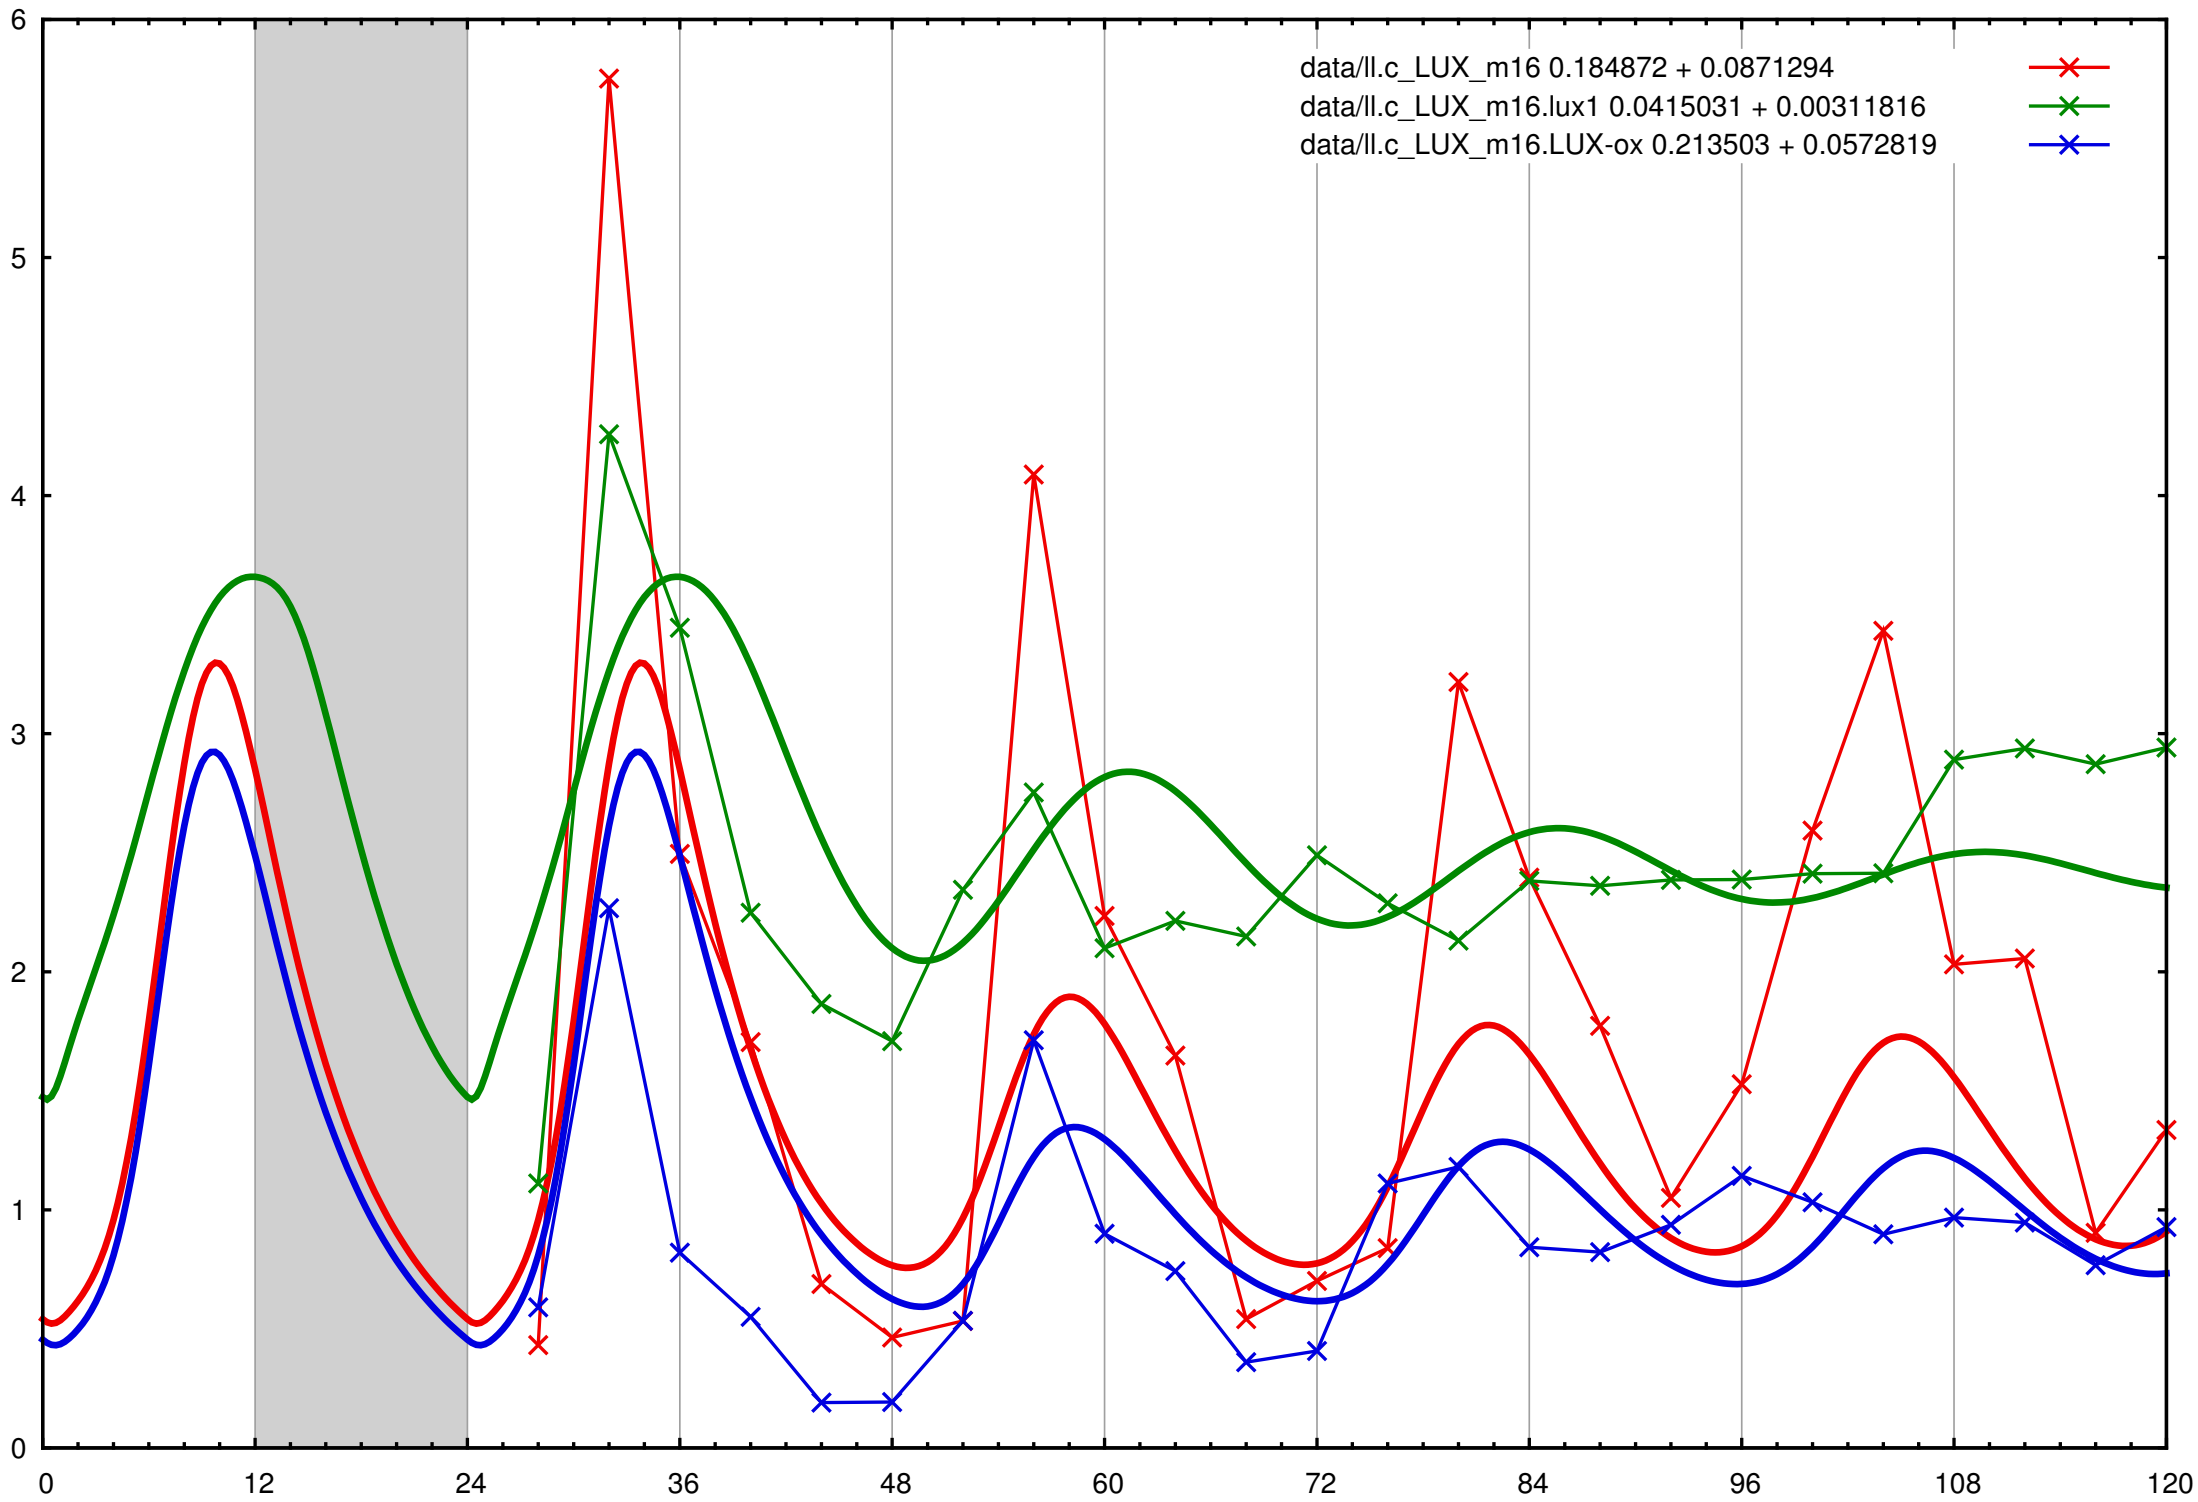



Scale group 161, scost 0.069416

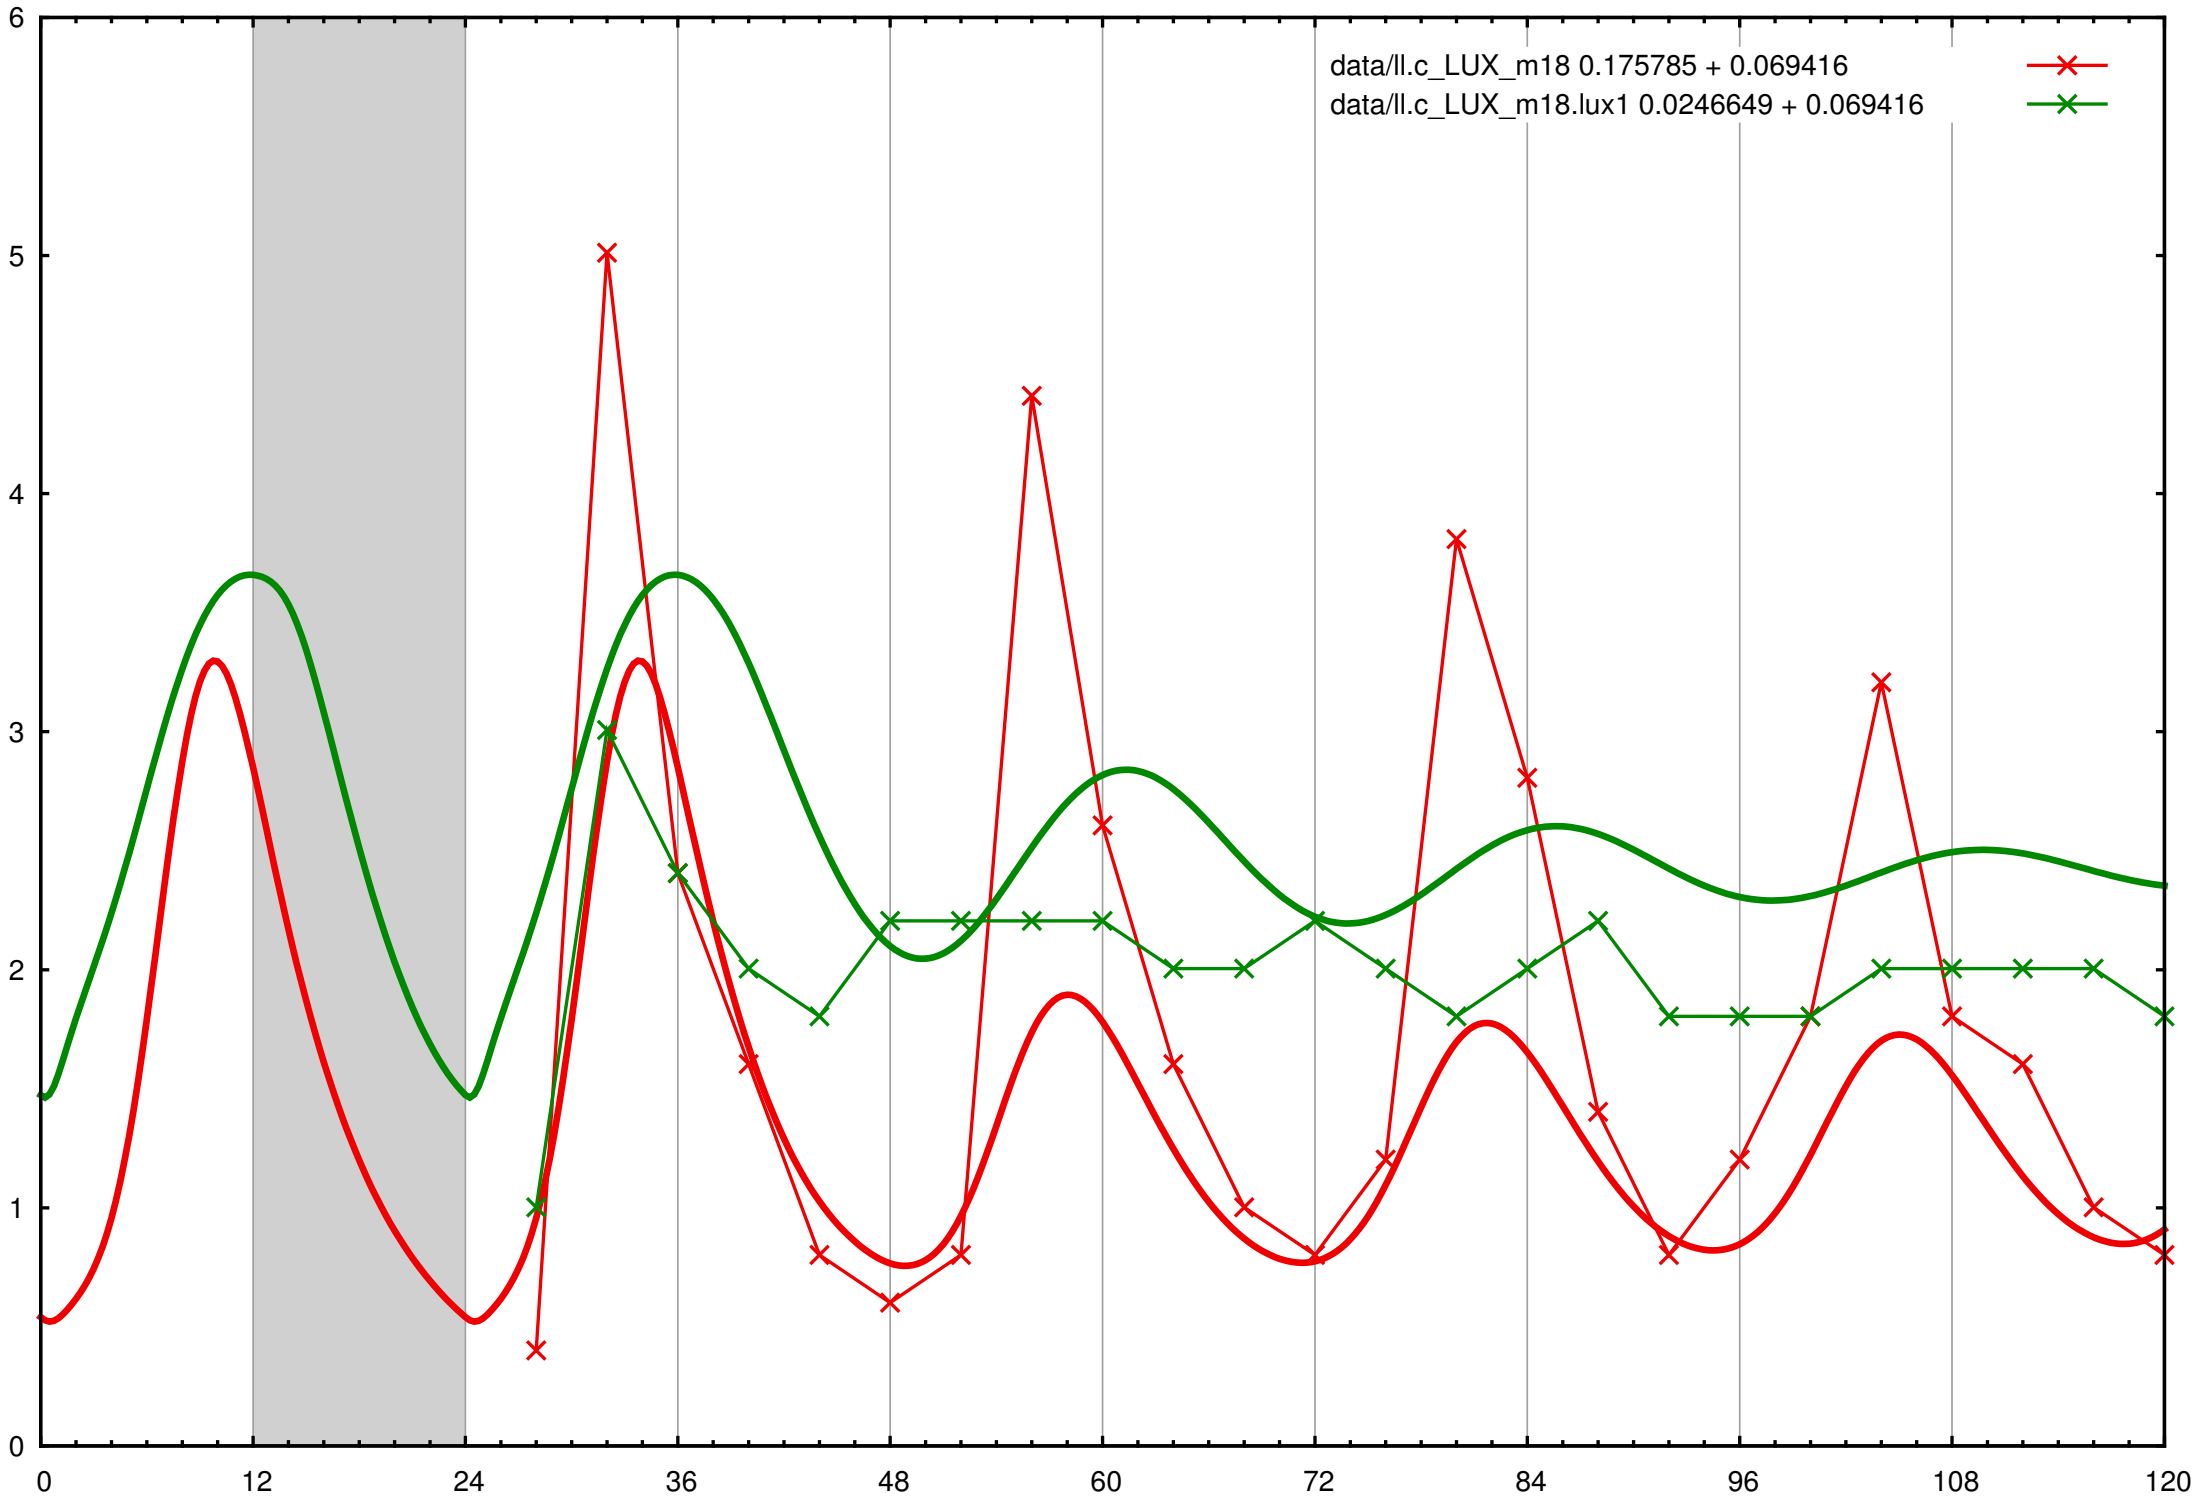

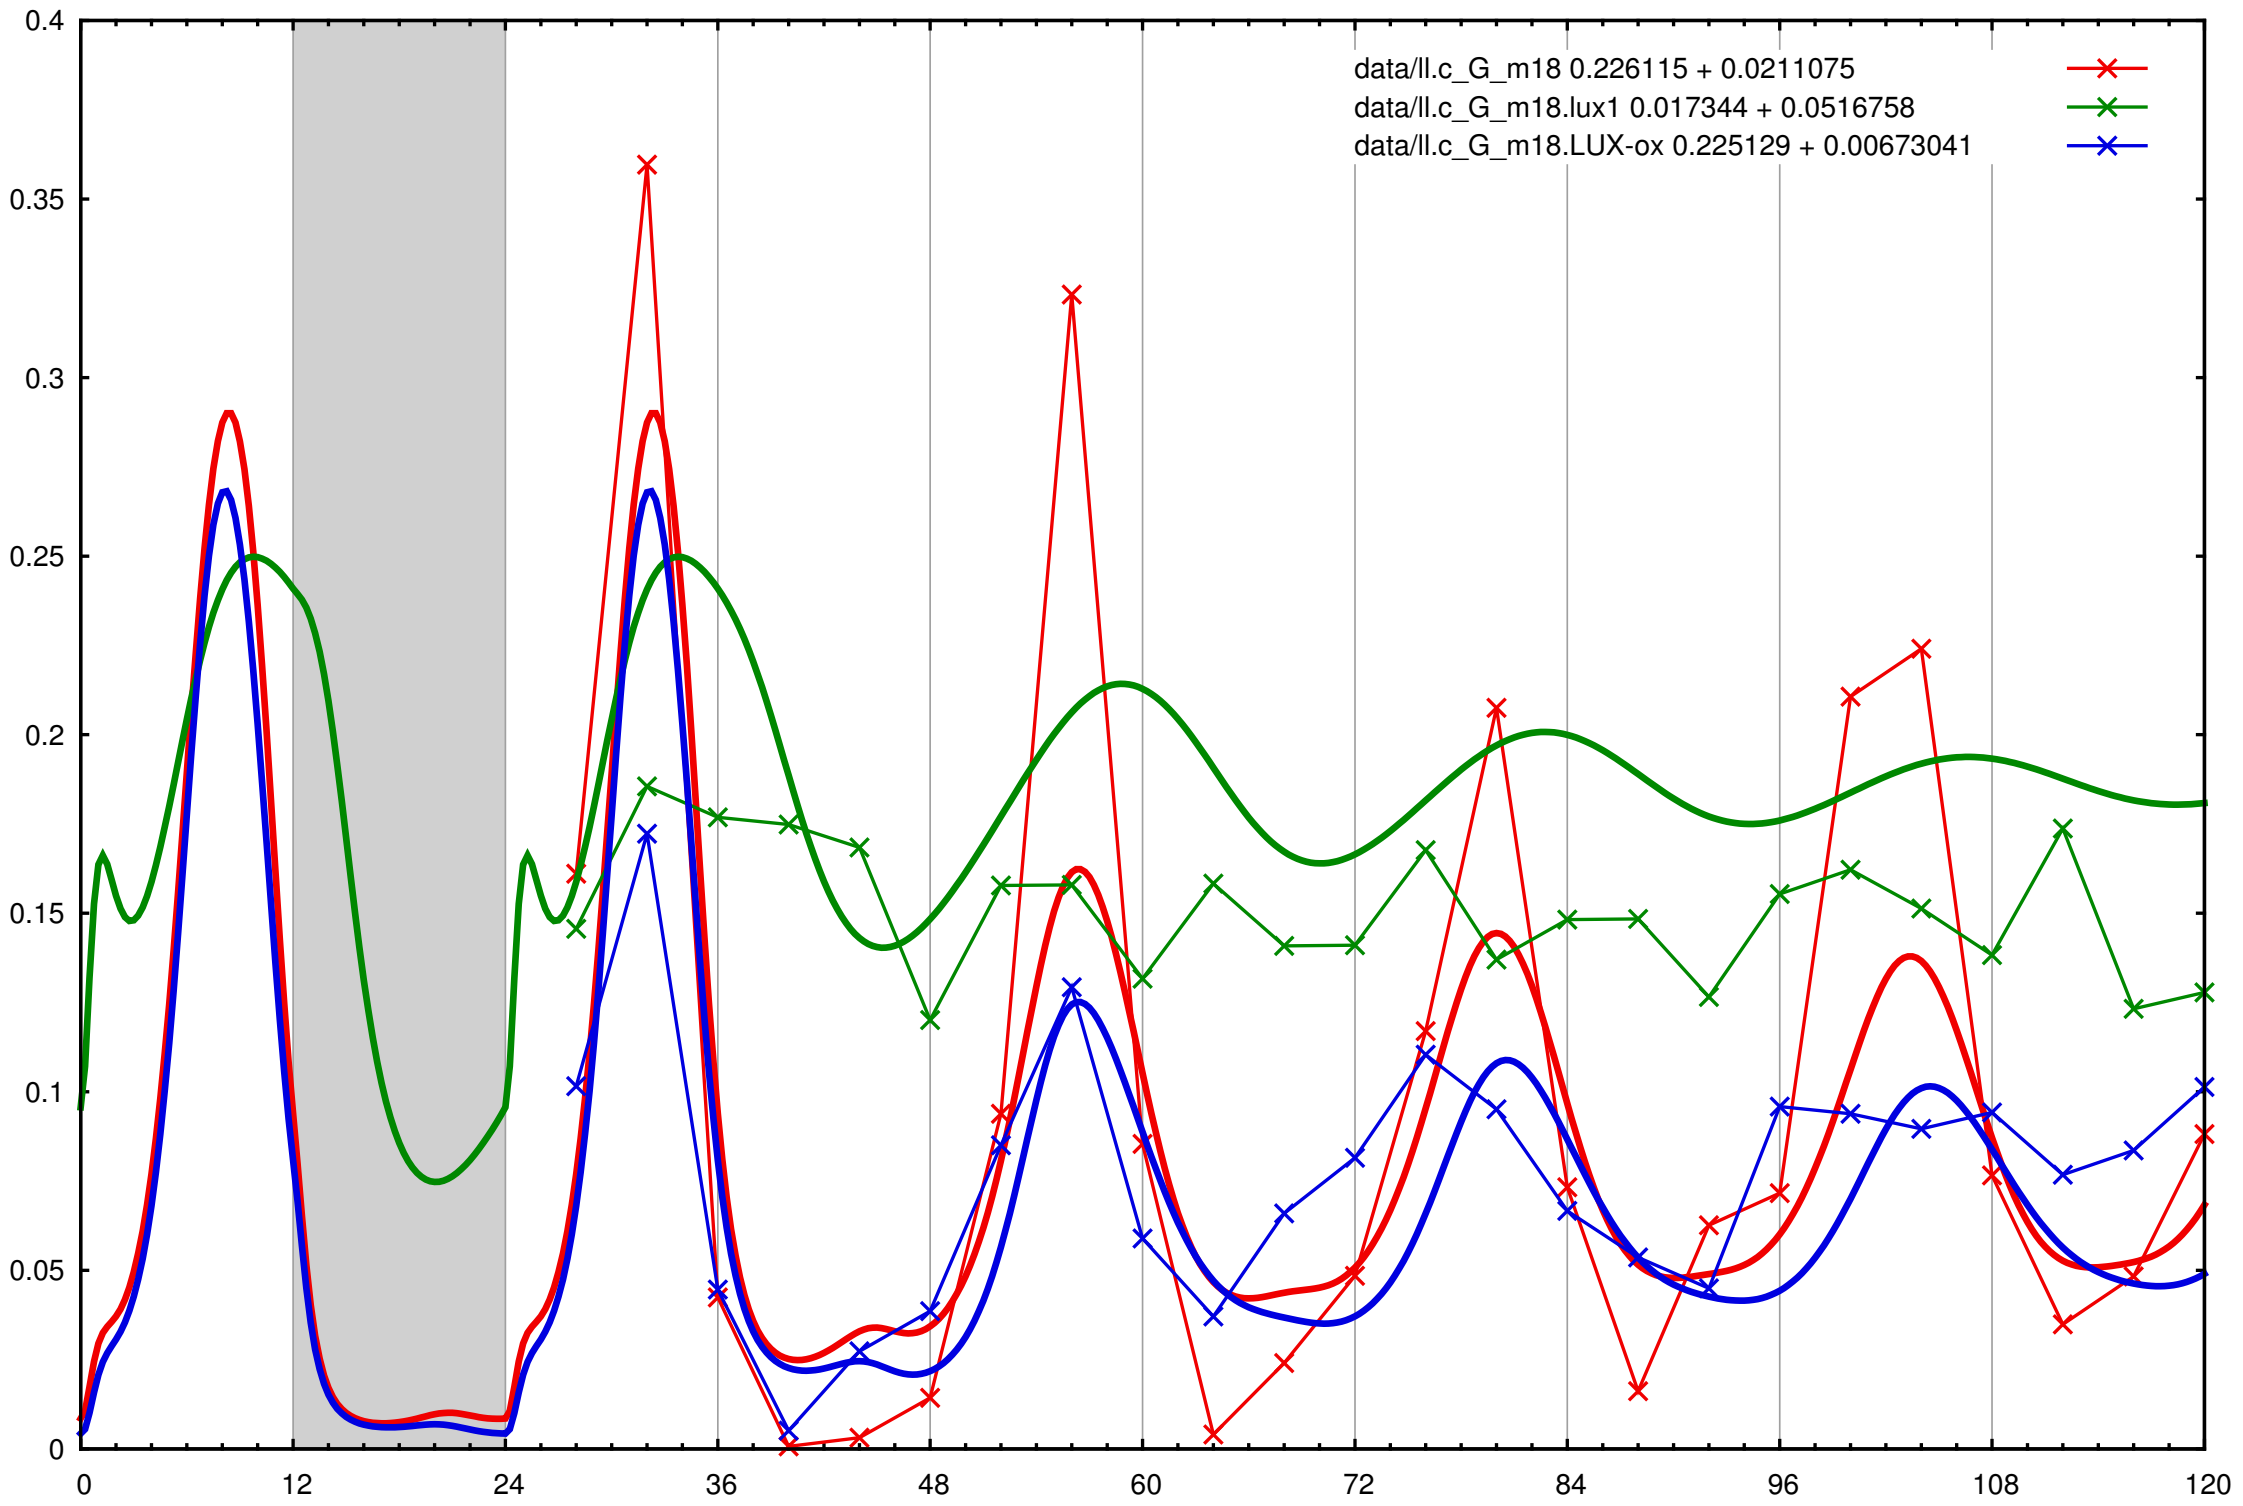

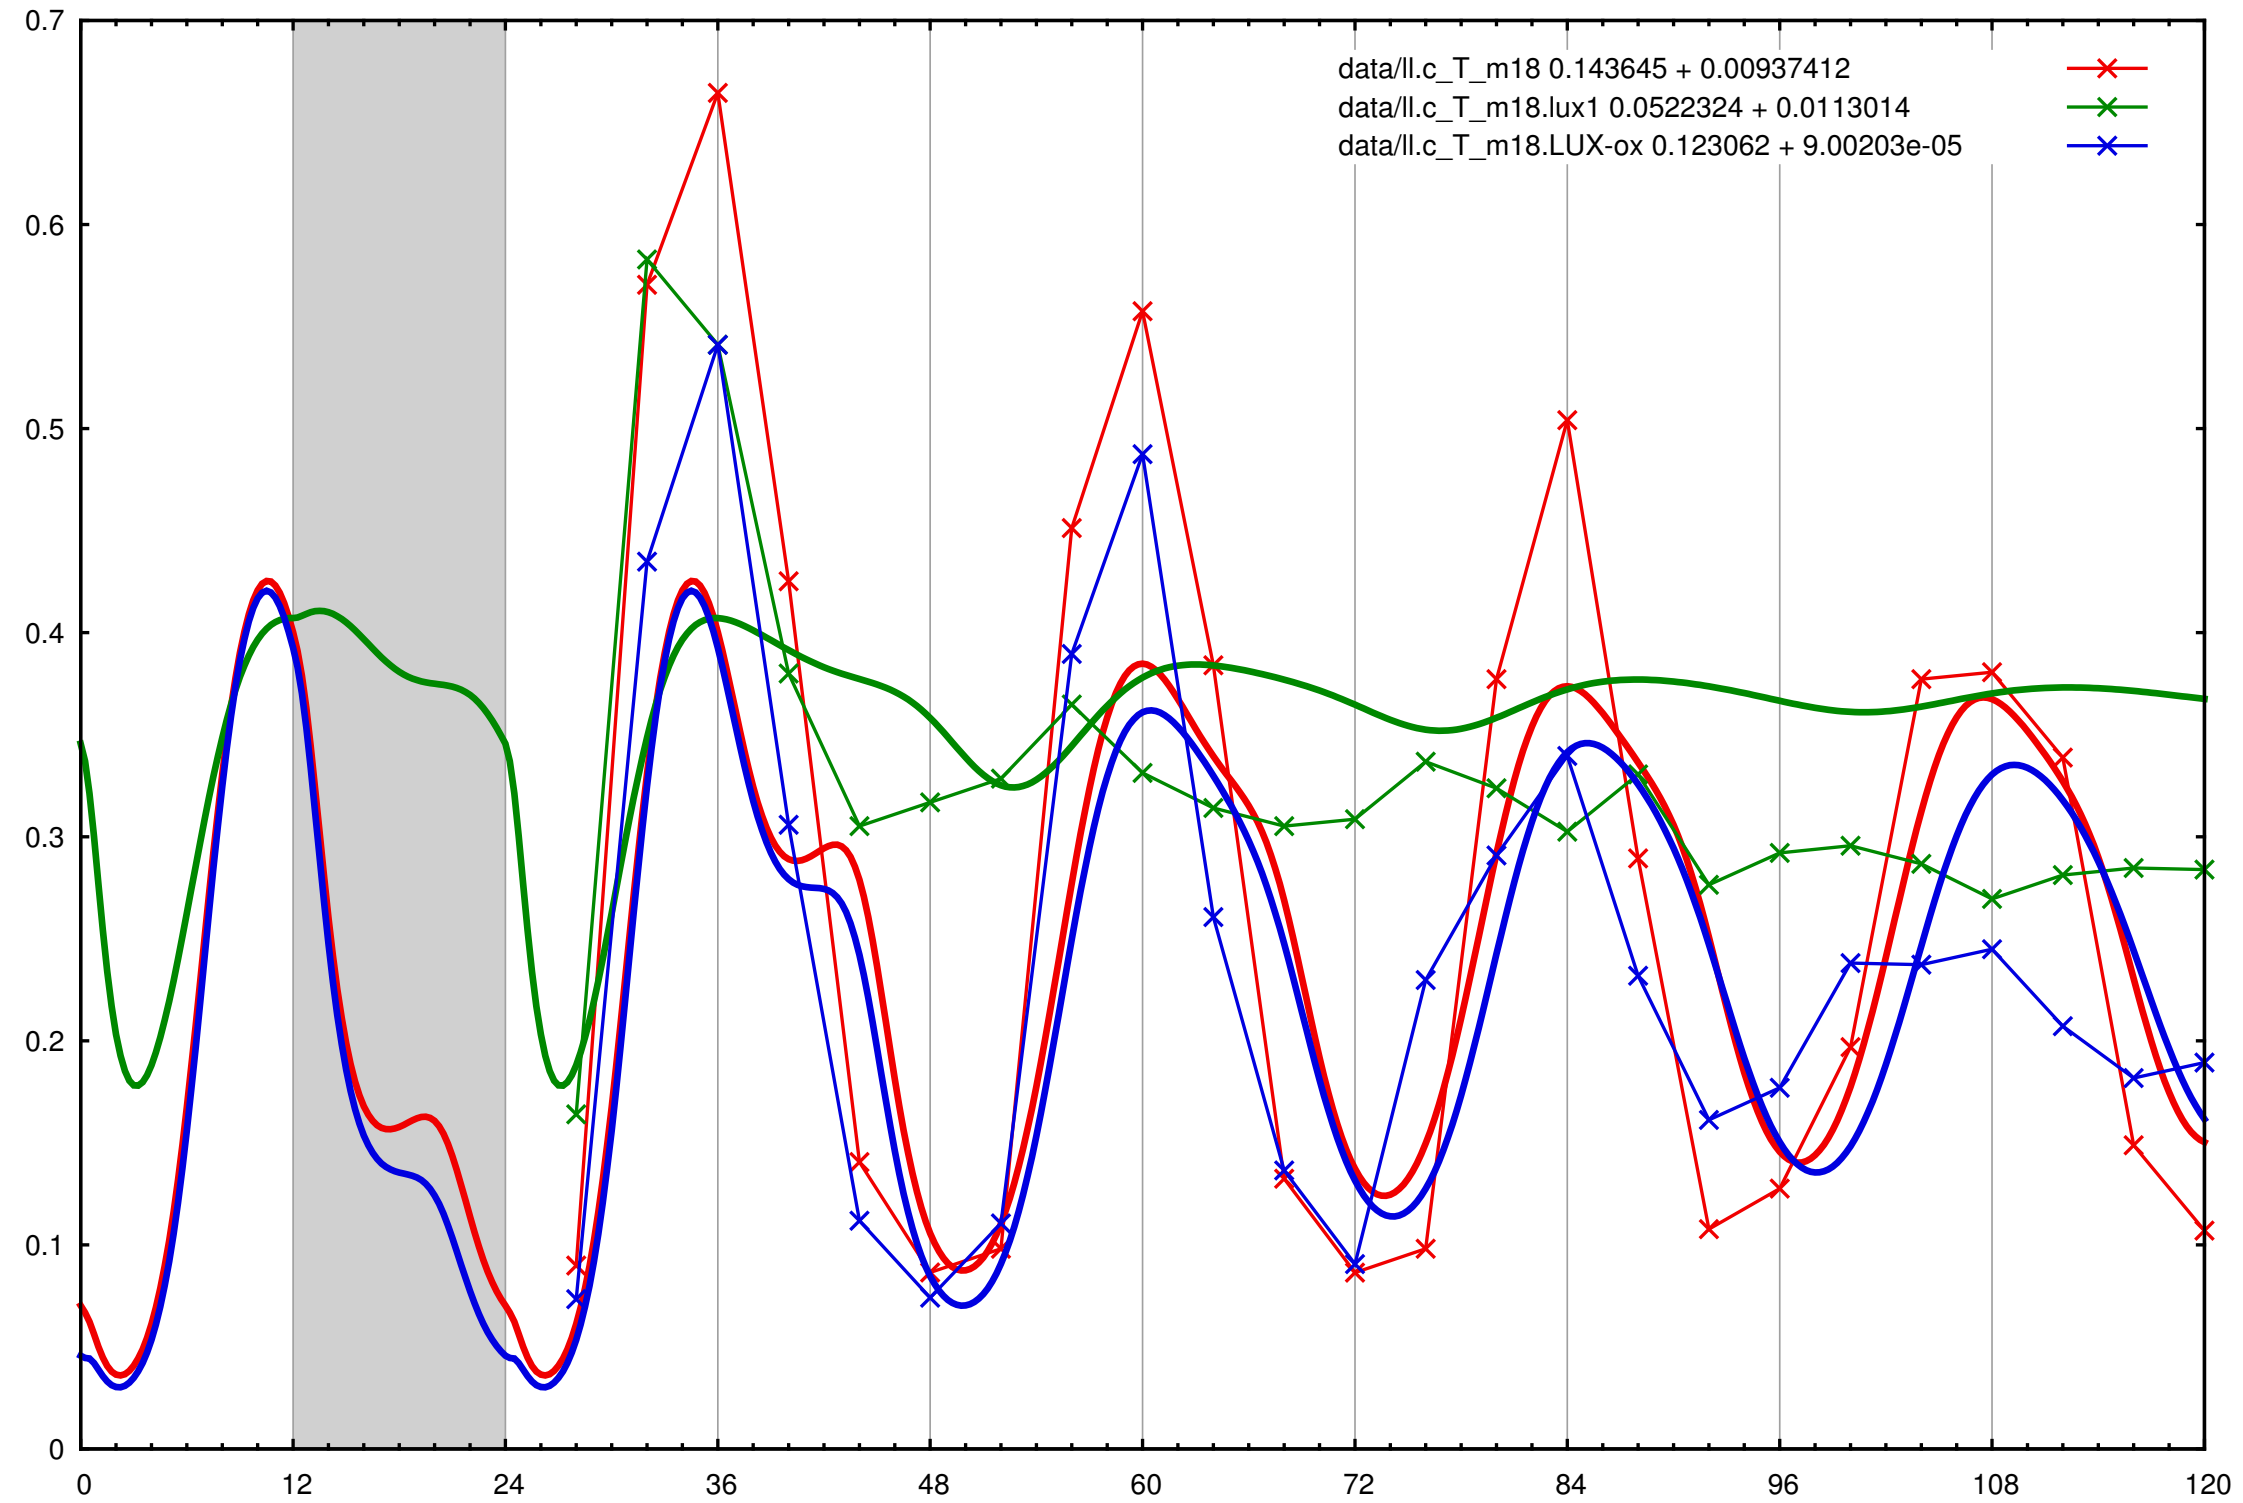

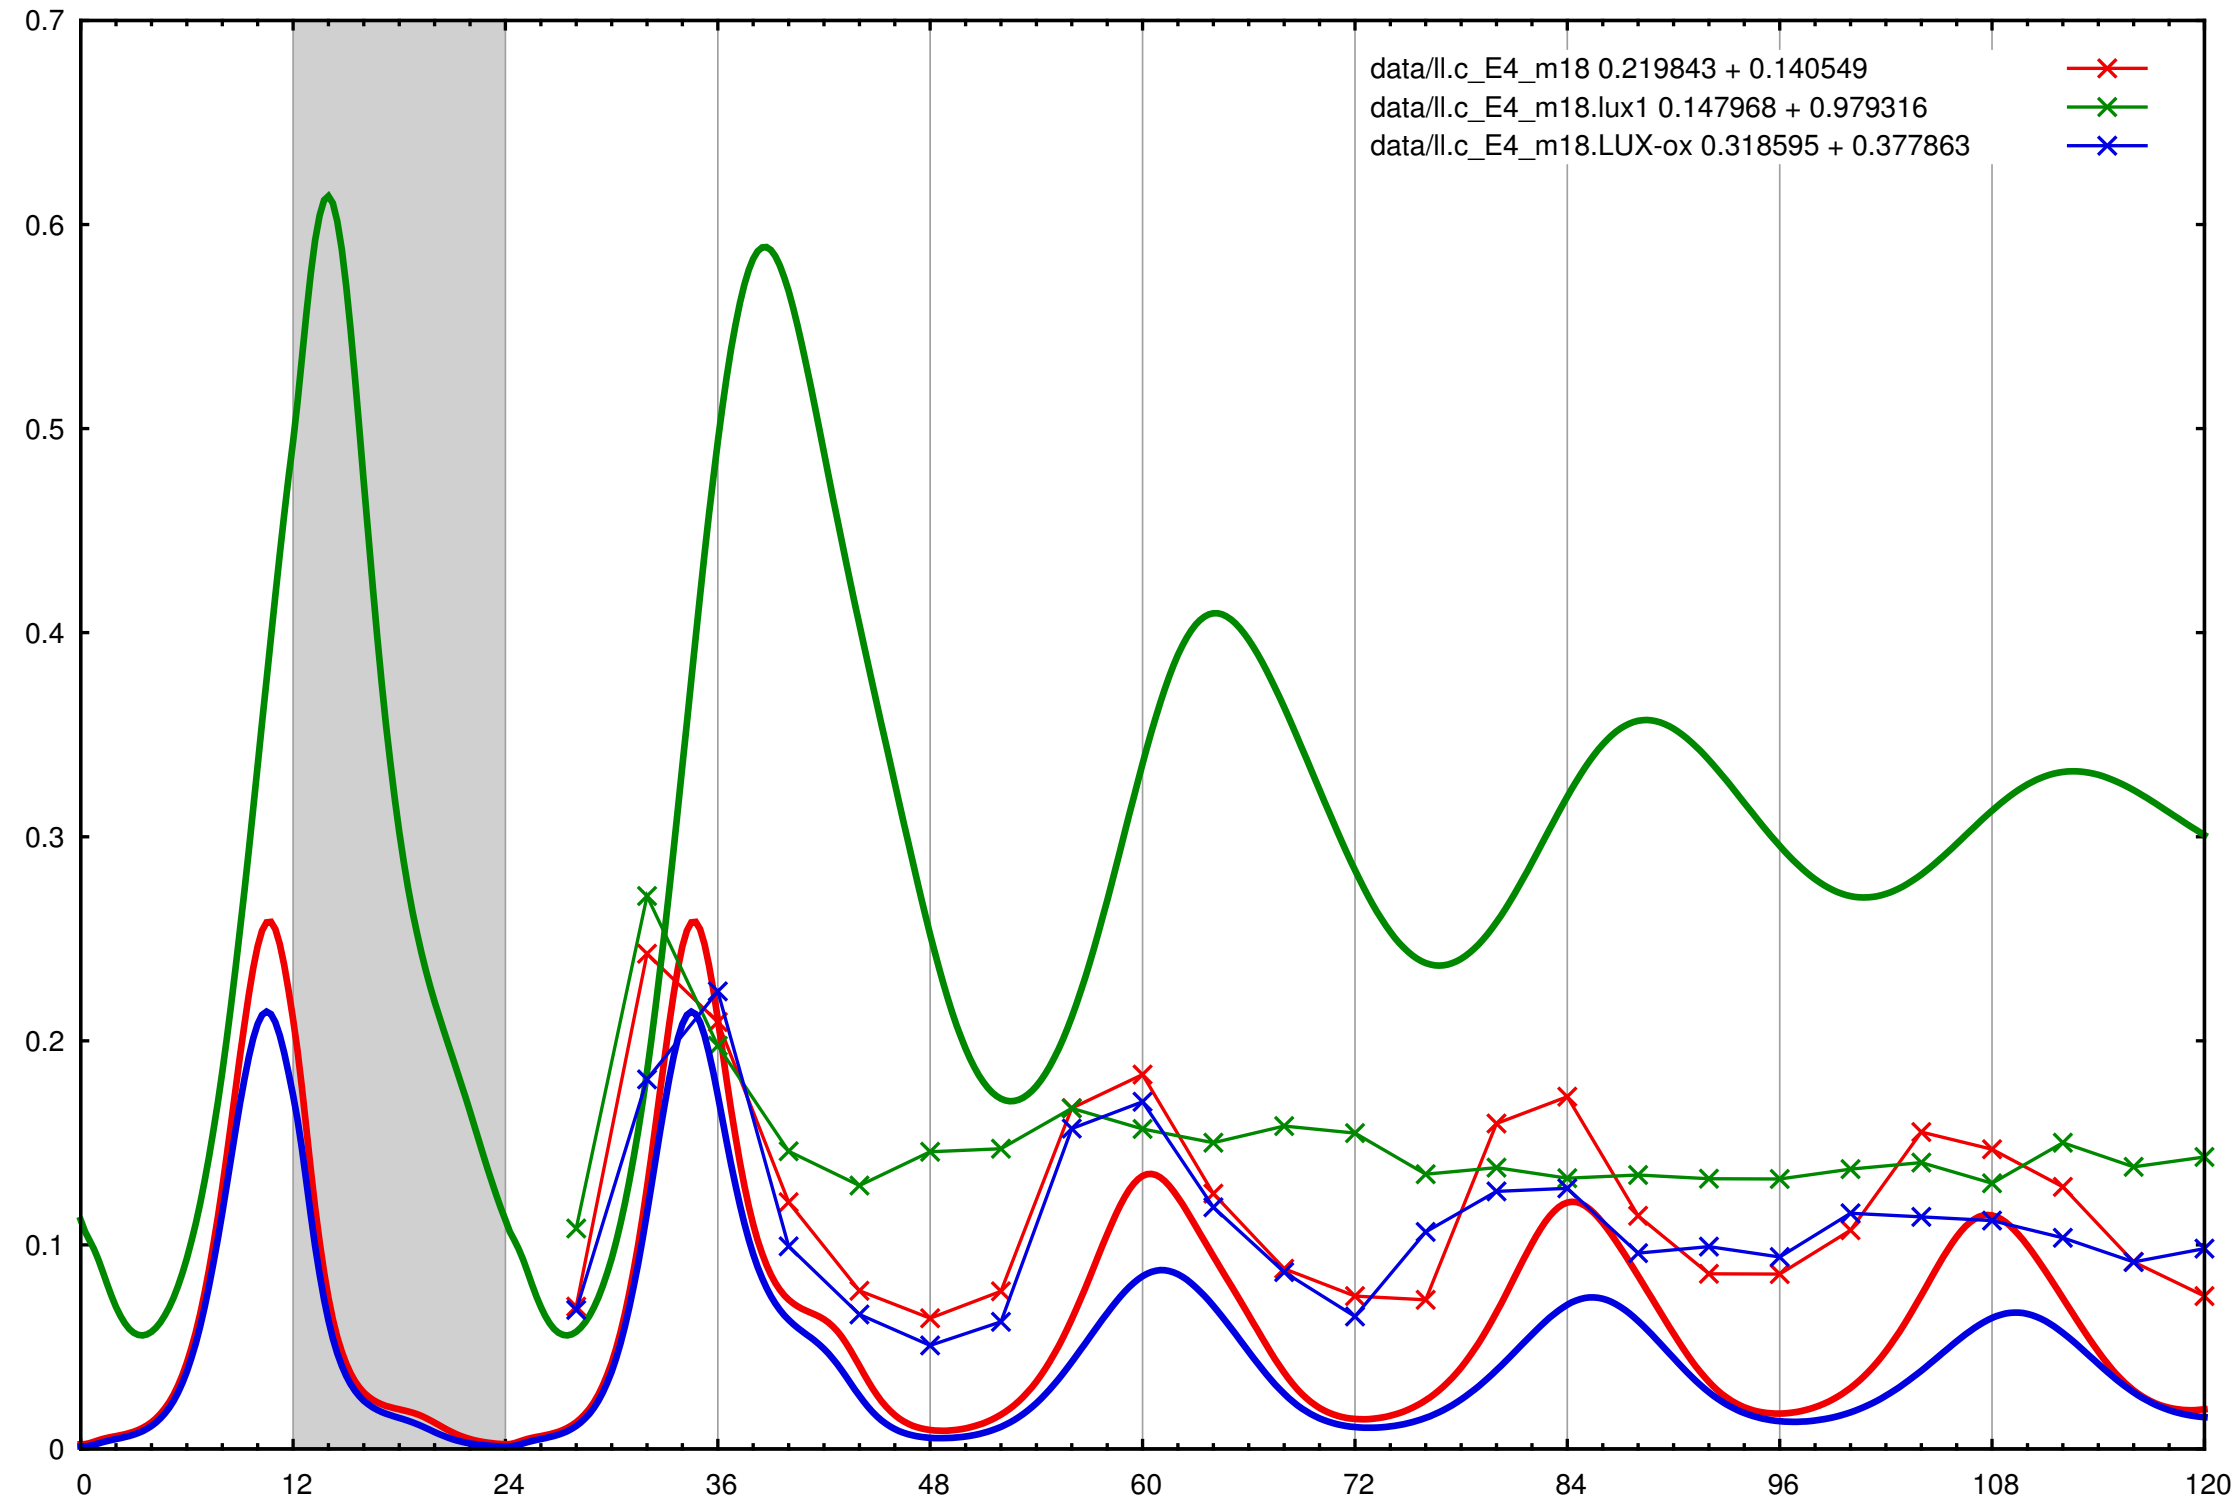

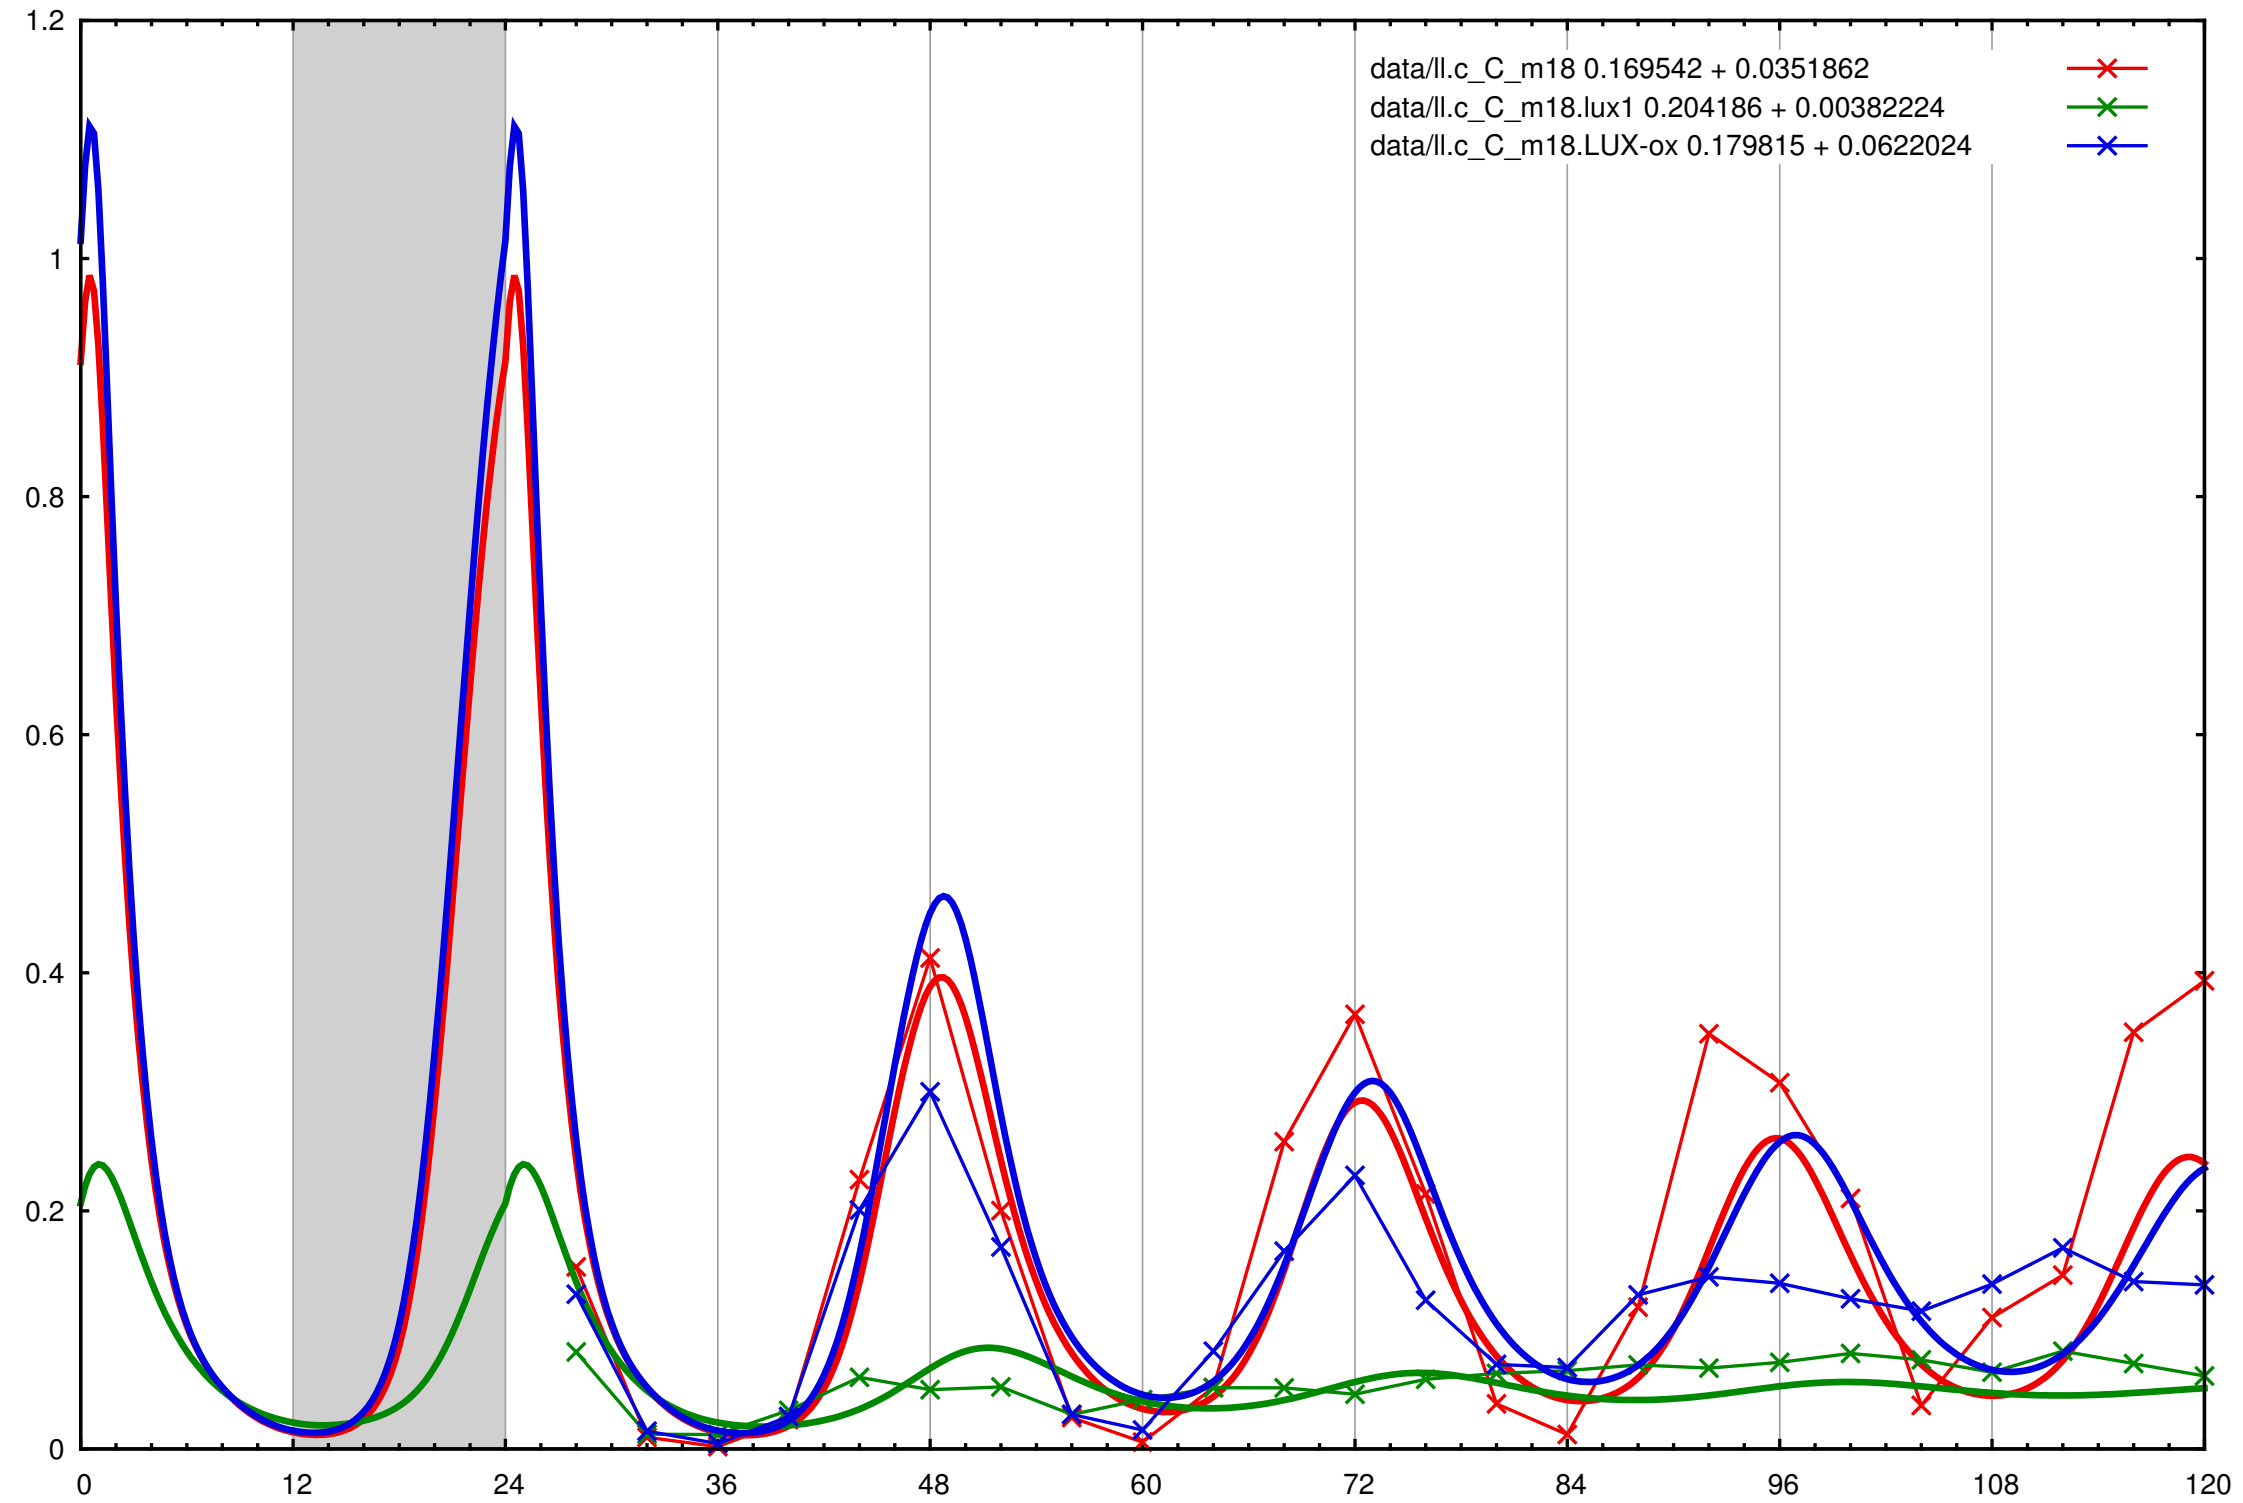

Scale group 166, scost 0.384376

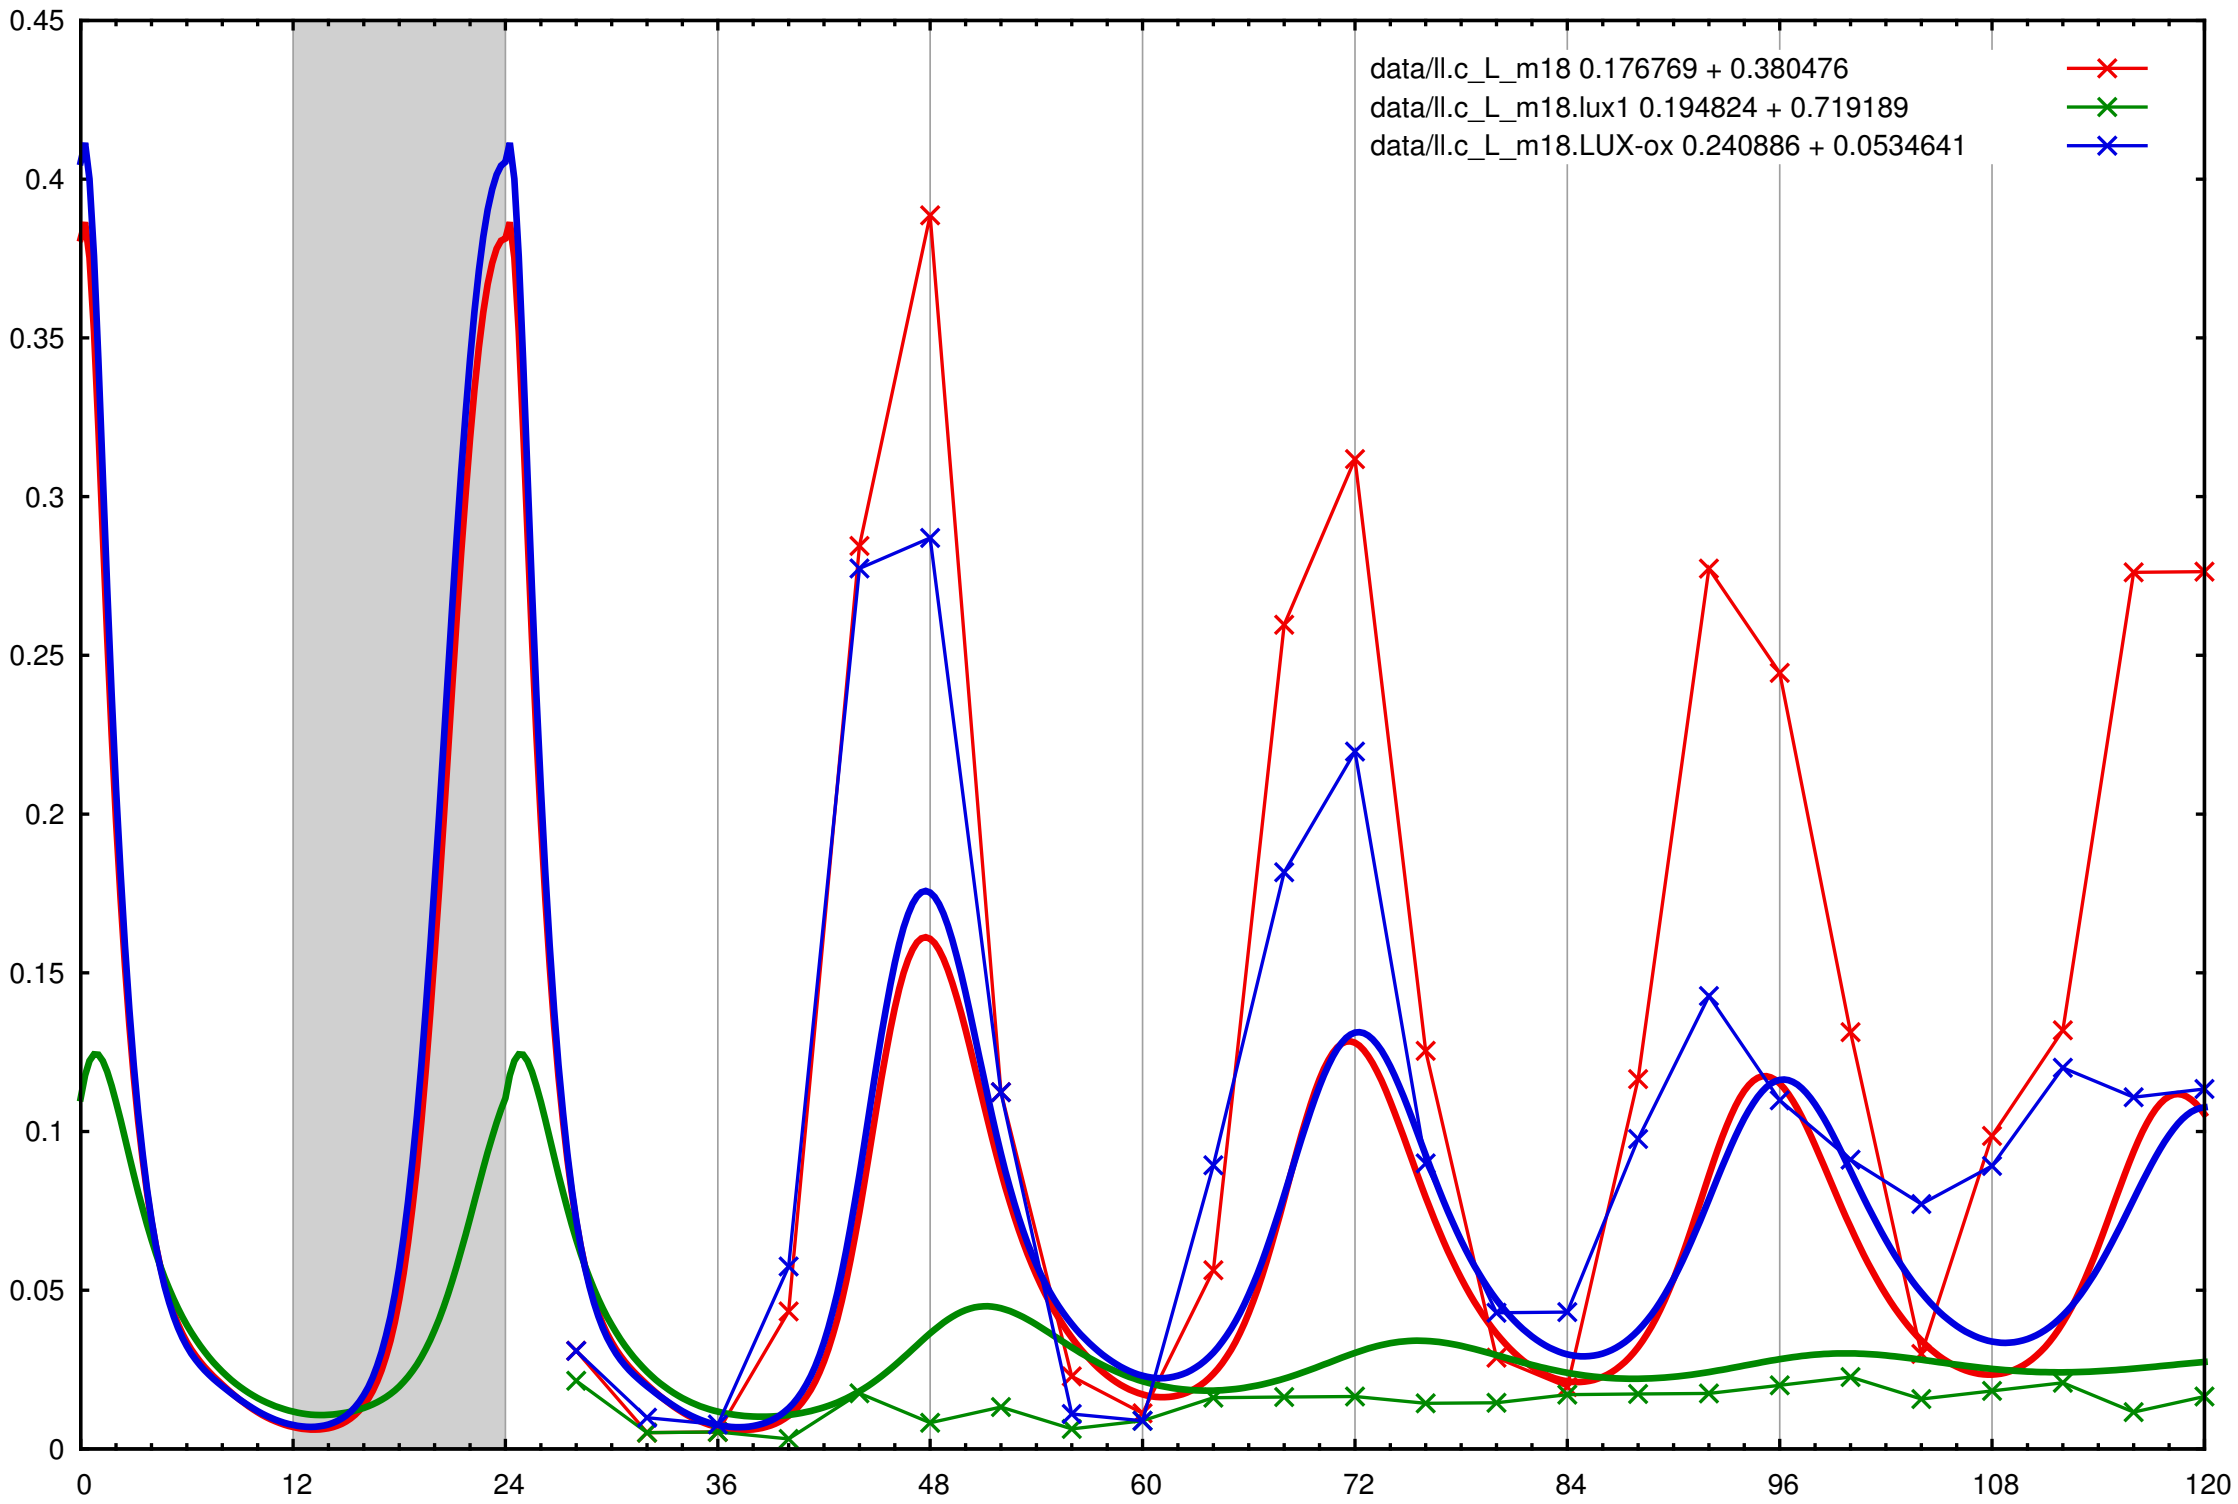

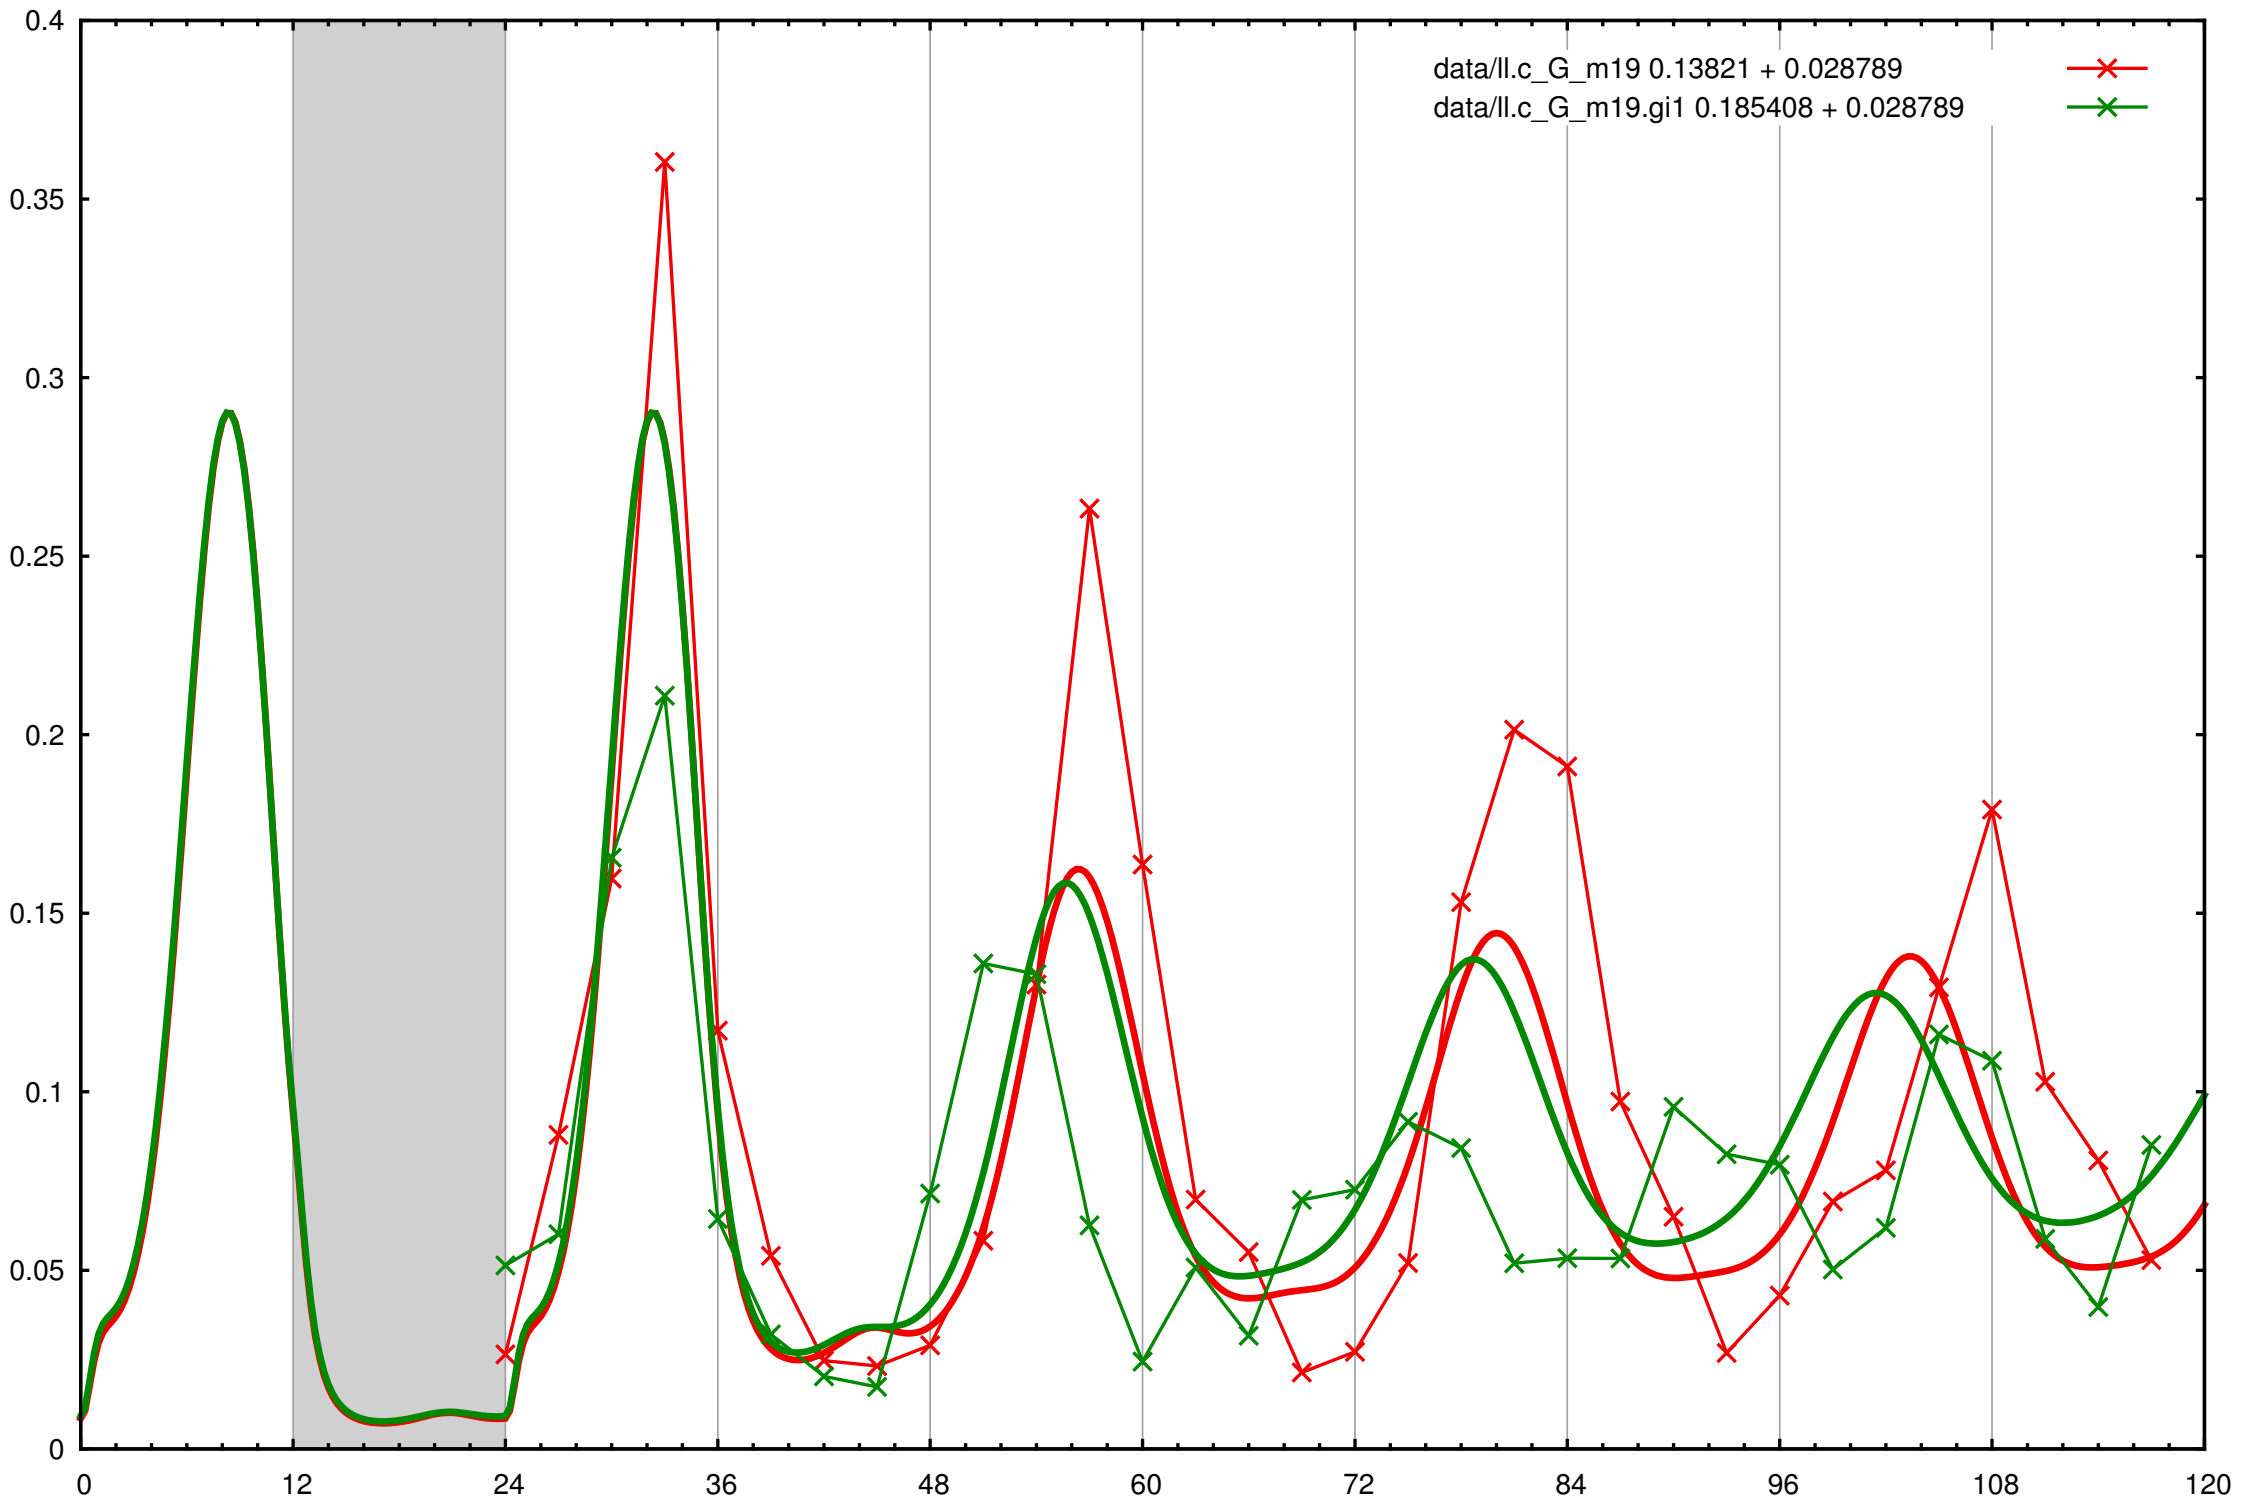

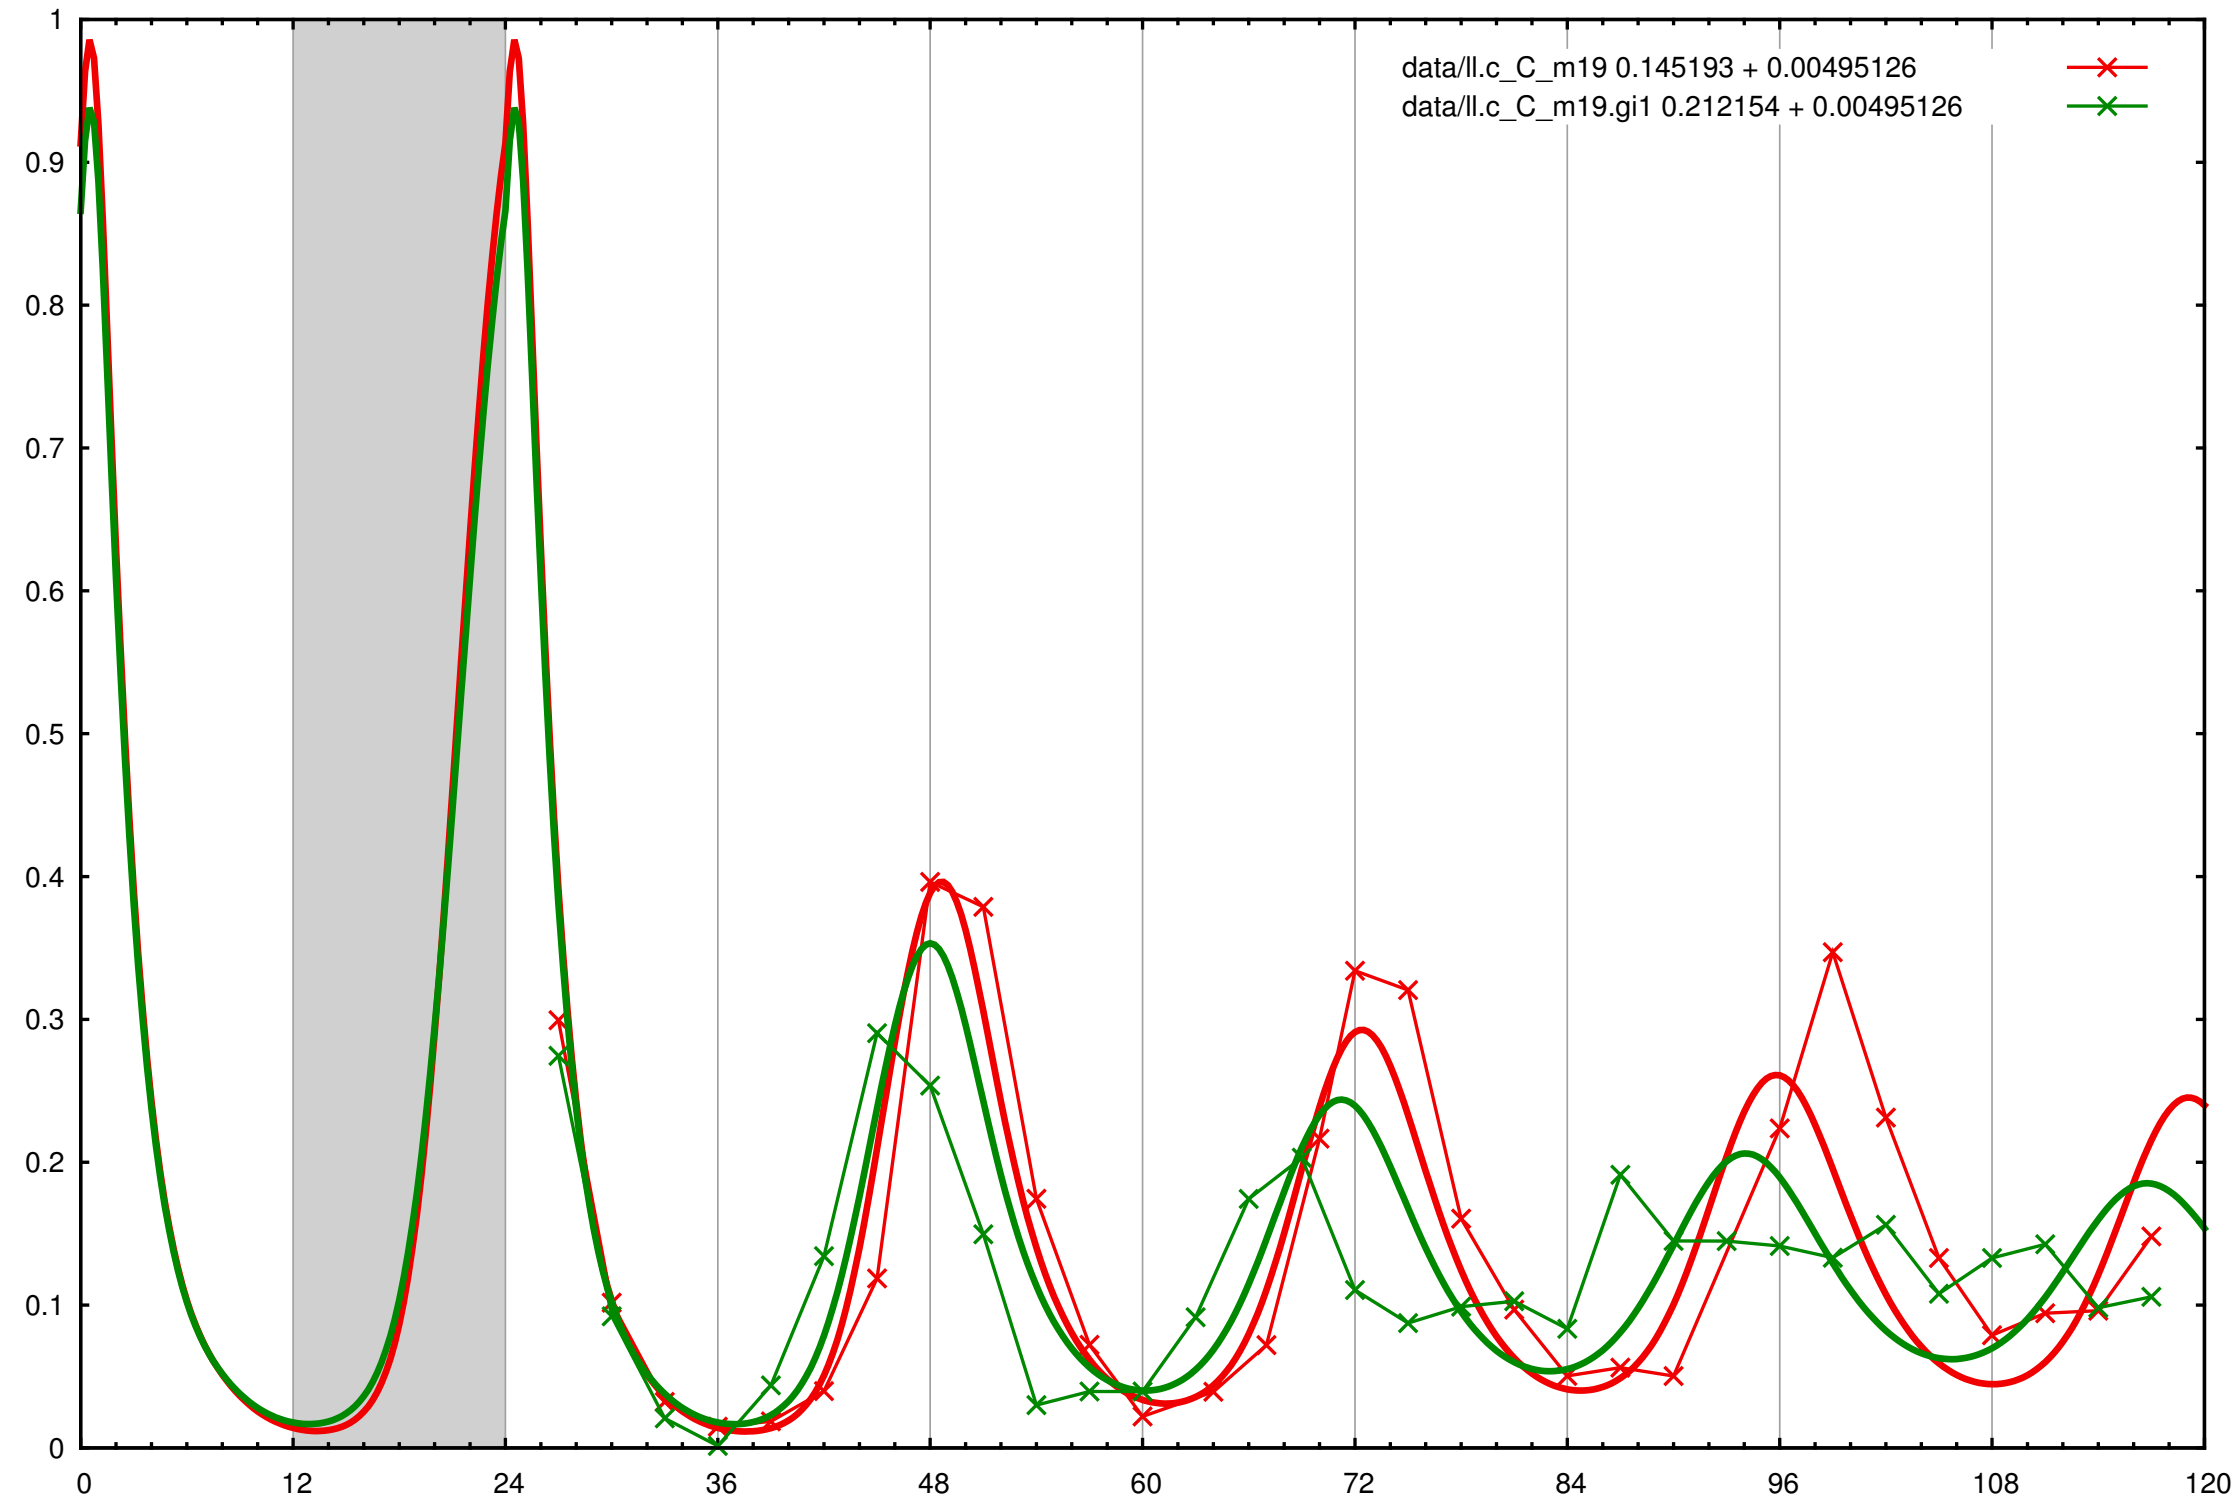



Scale group 169, scost 0.115327

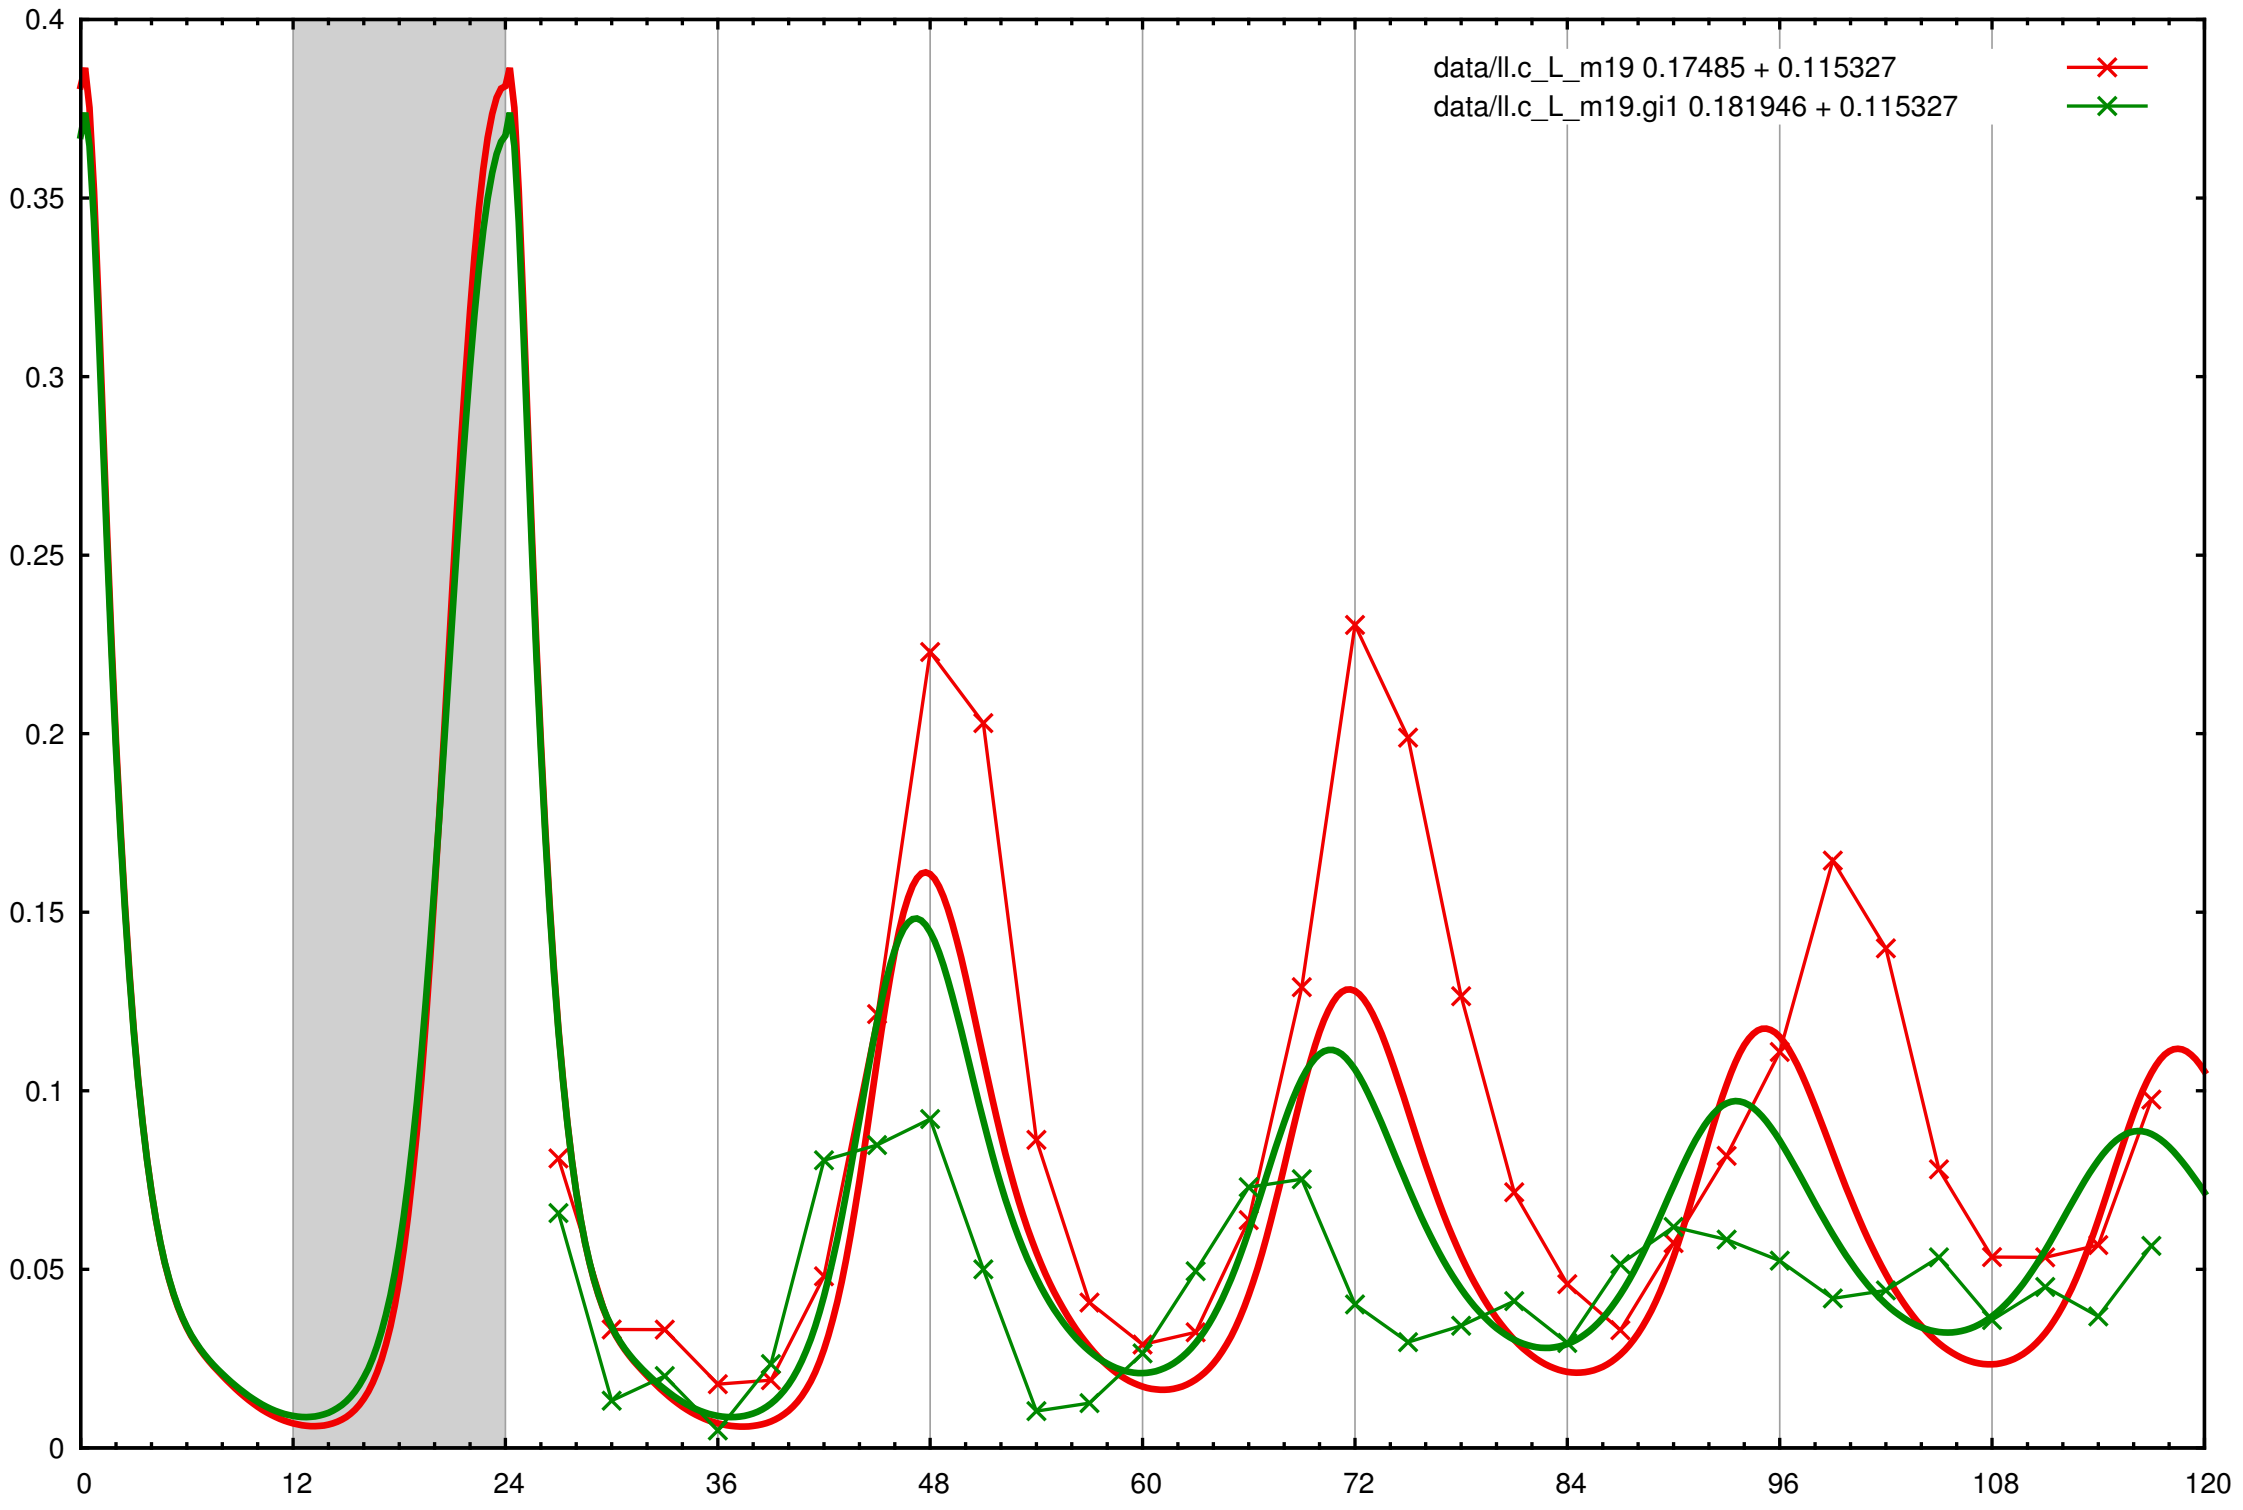

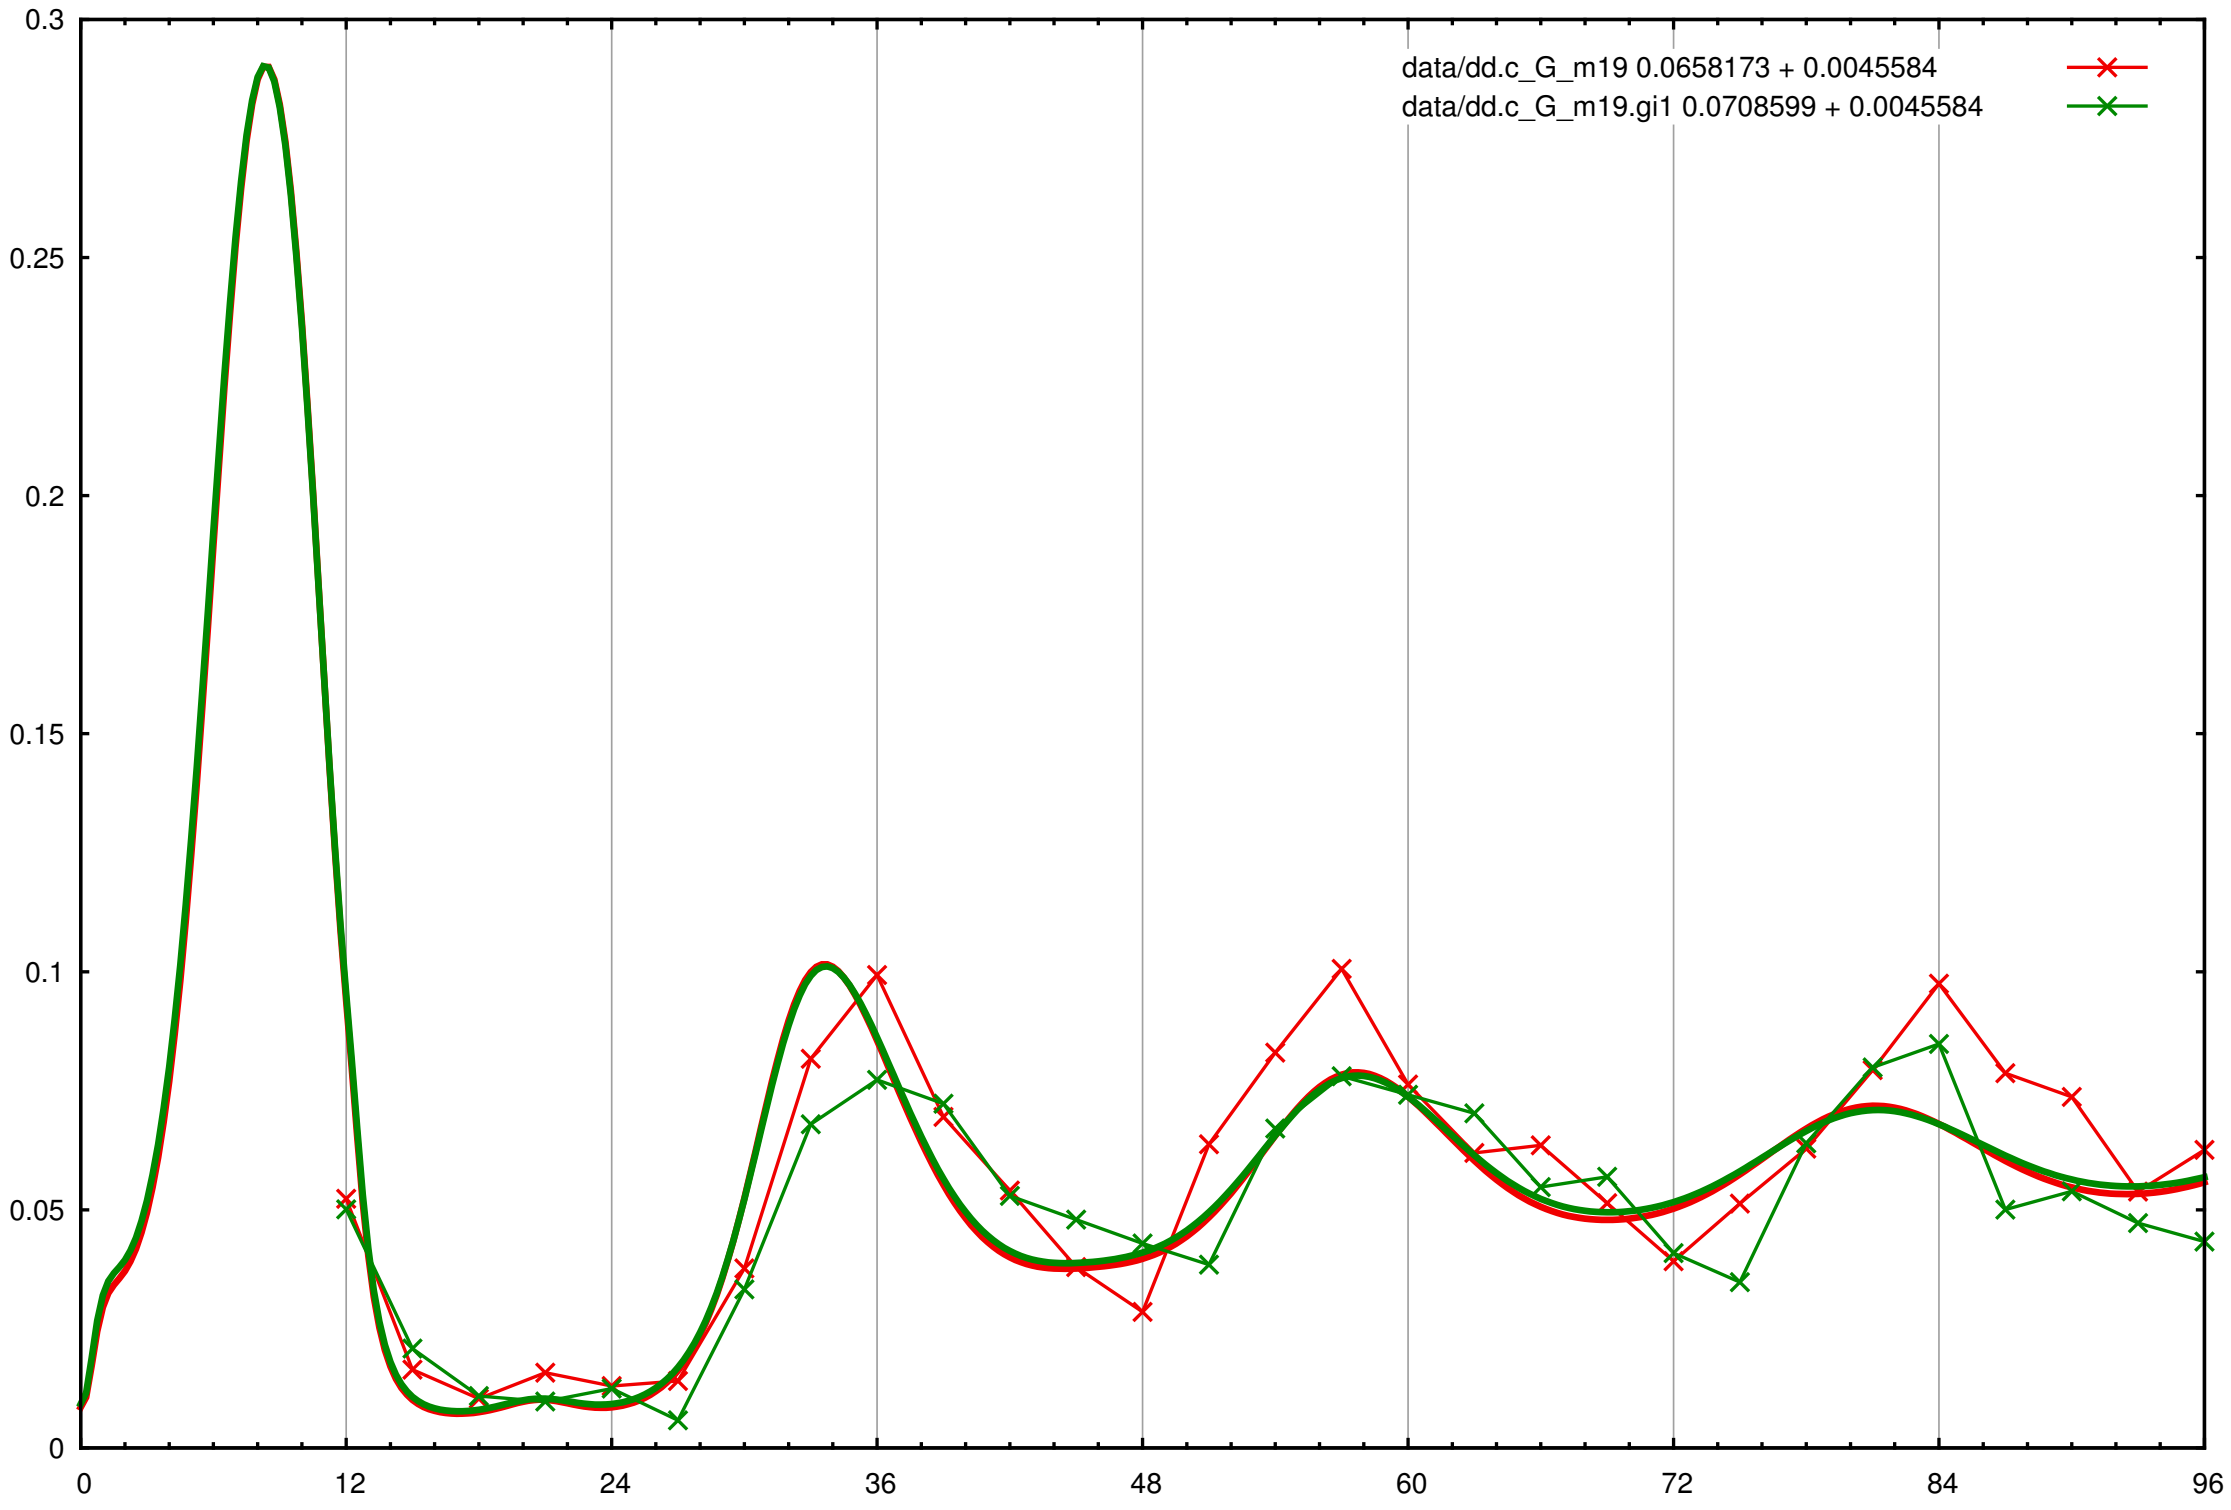

Scale group 171, scost 0.00101555

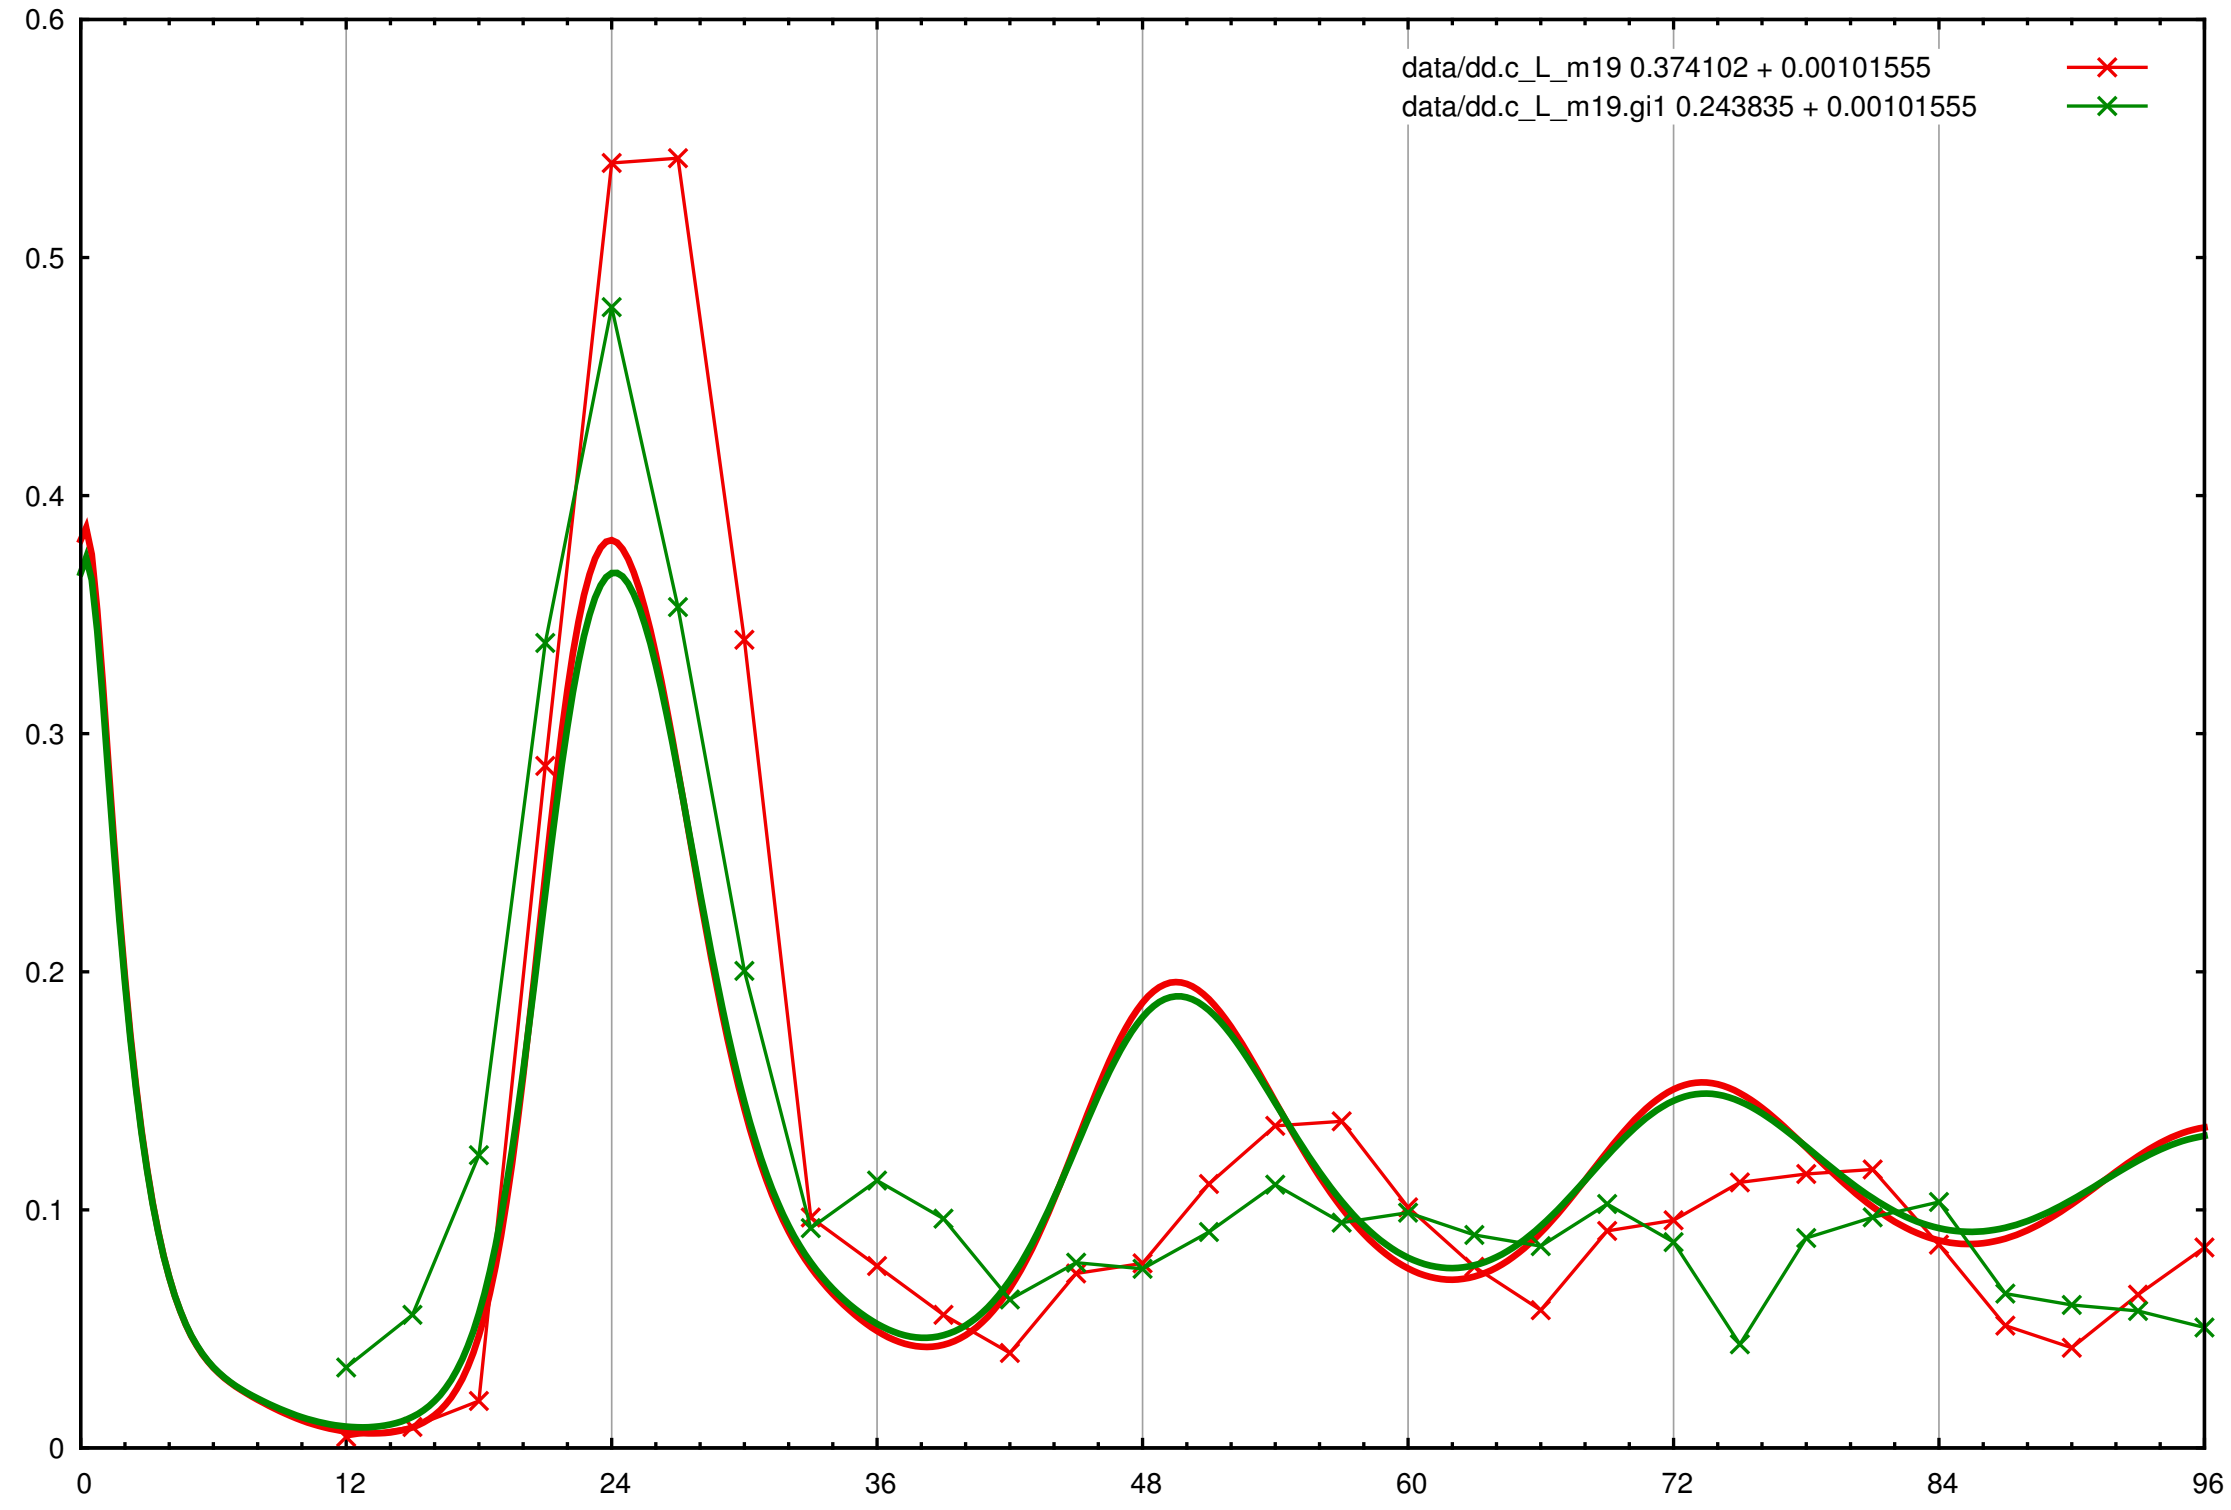

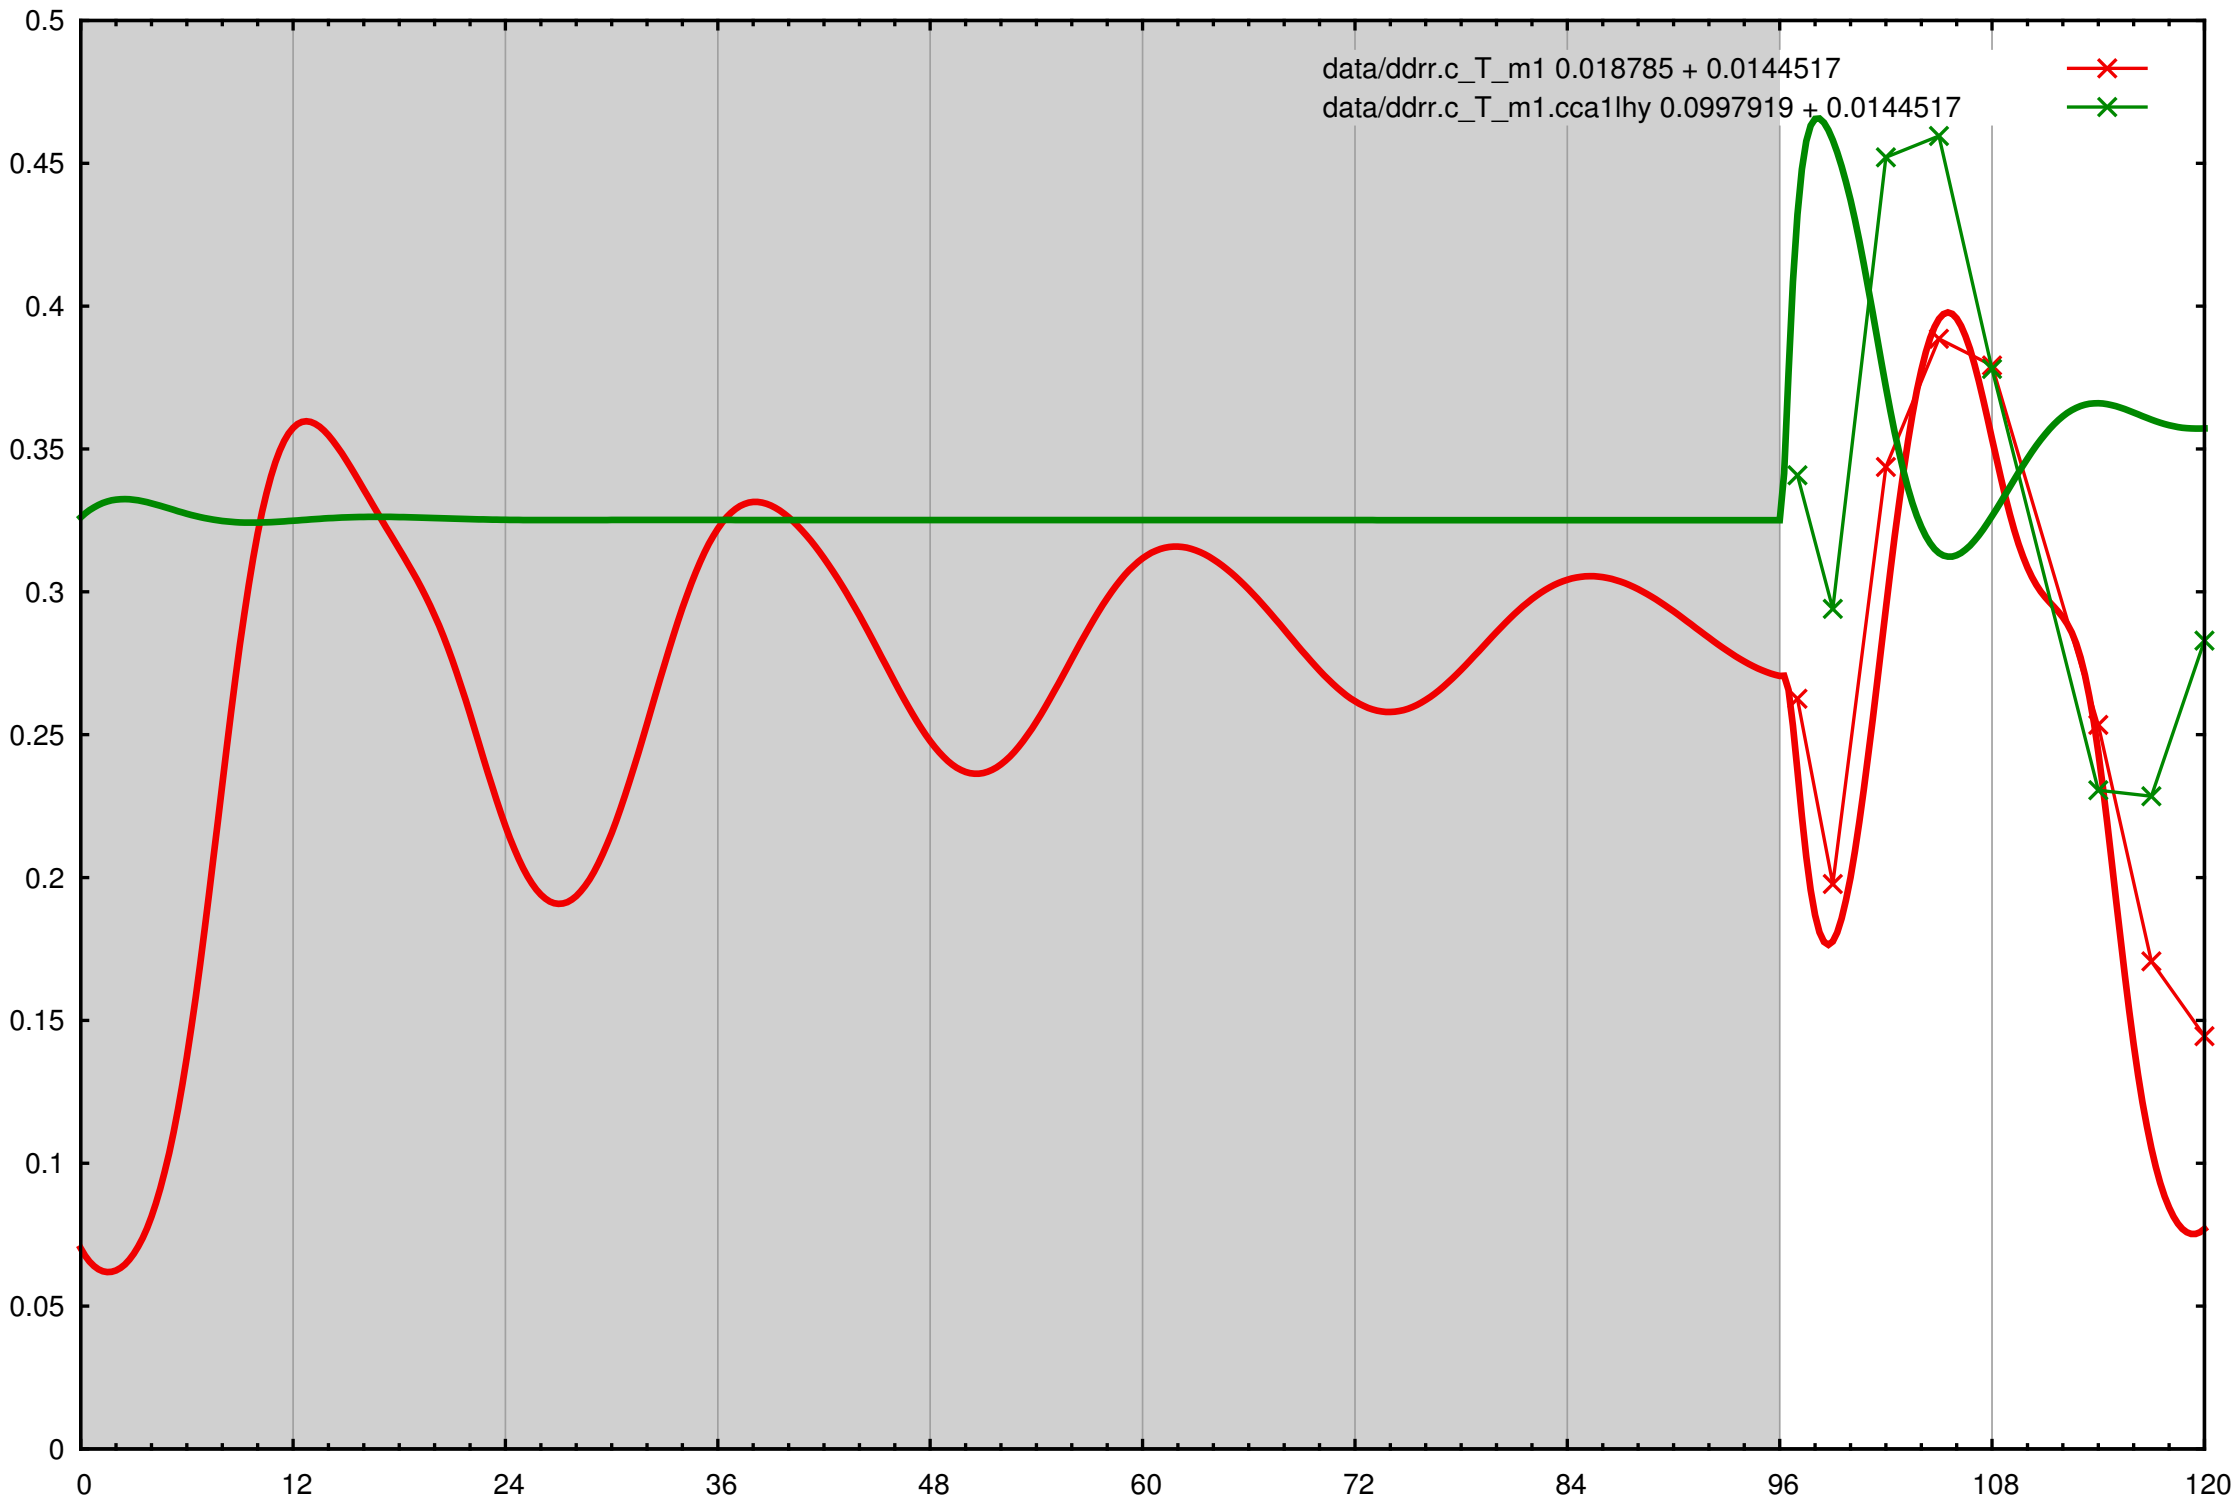

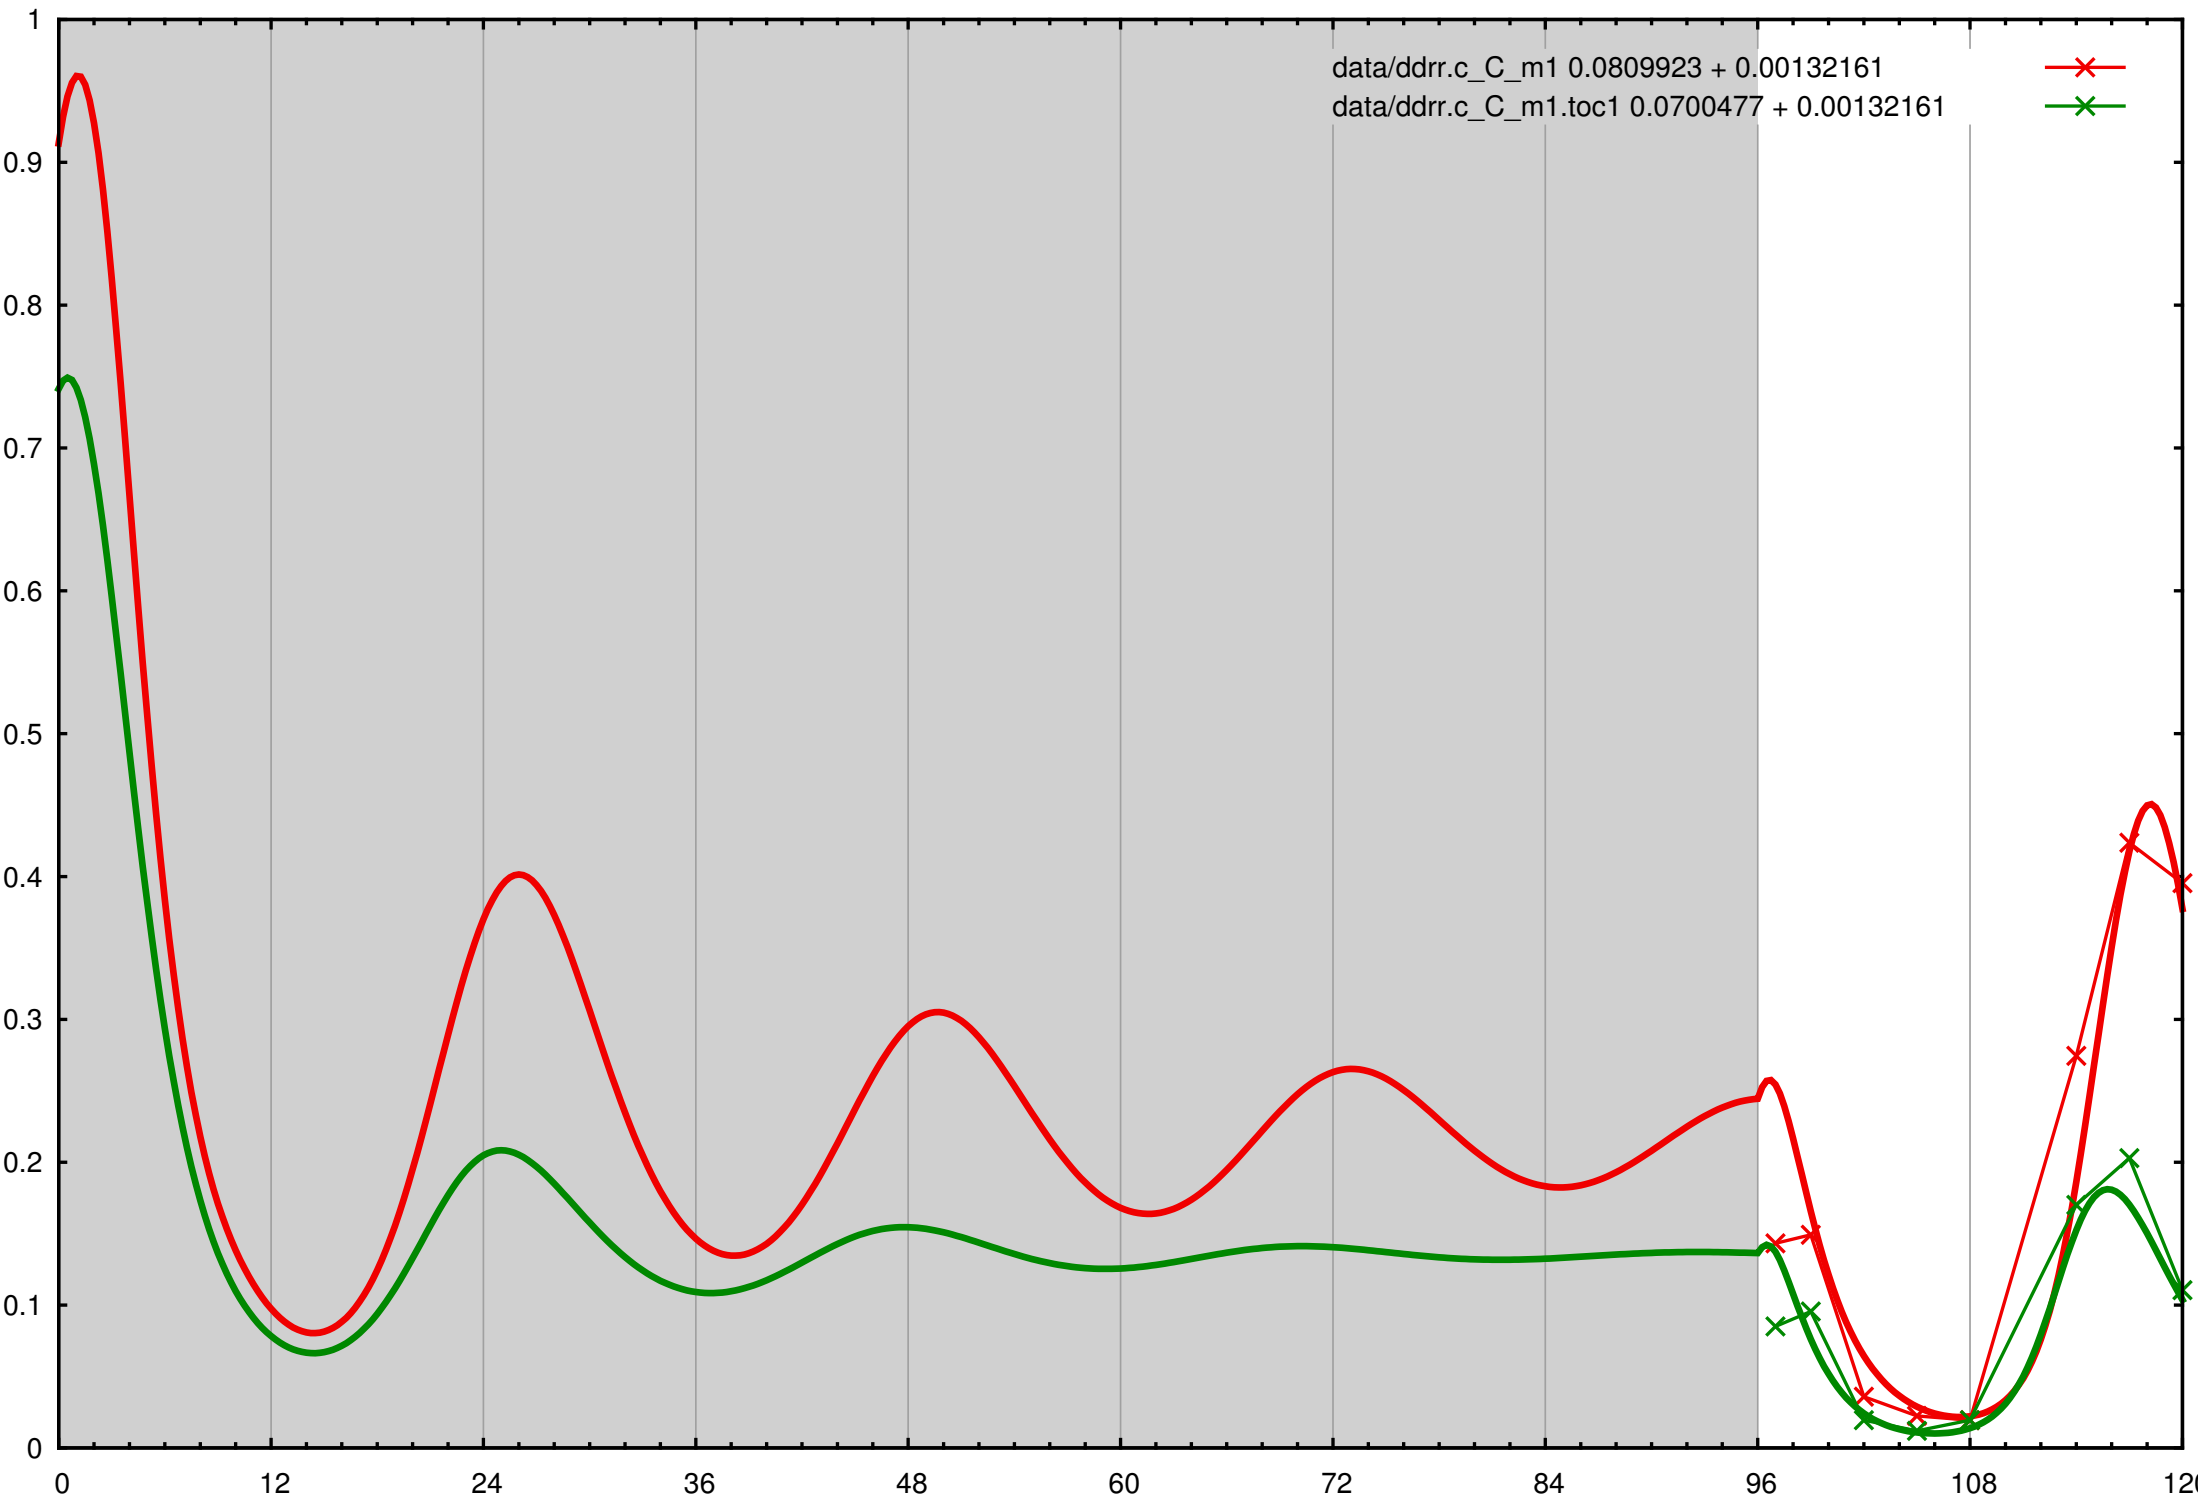

Scale group 174, scost 0.000214854

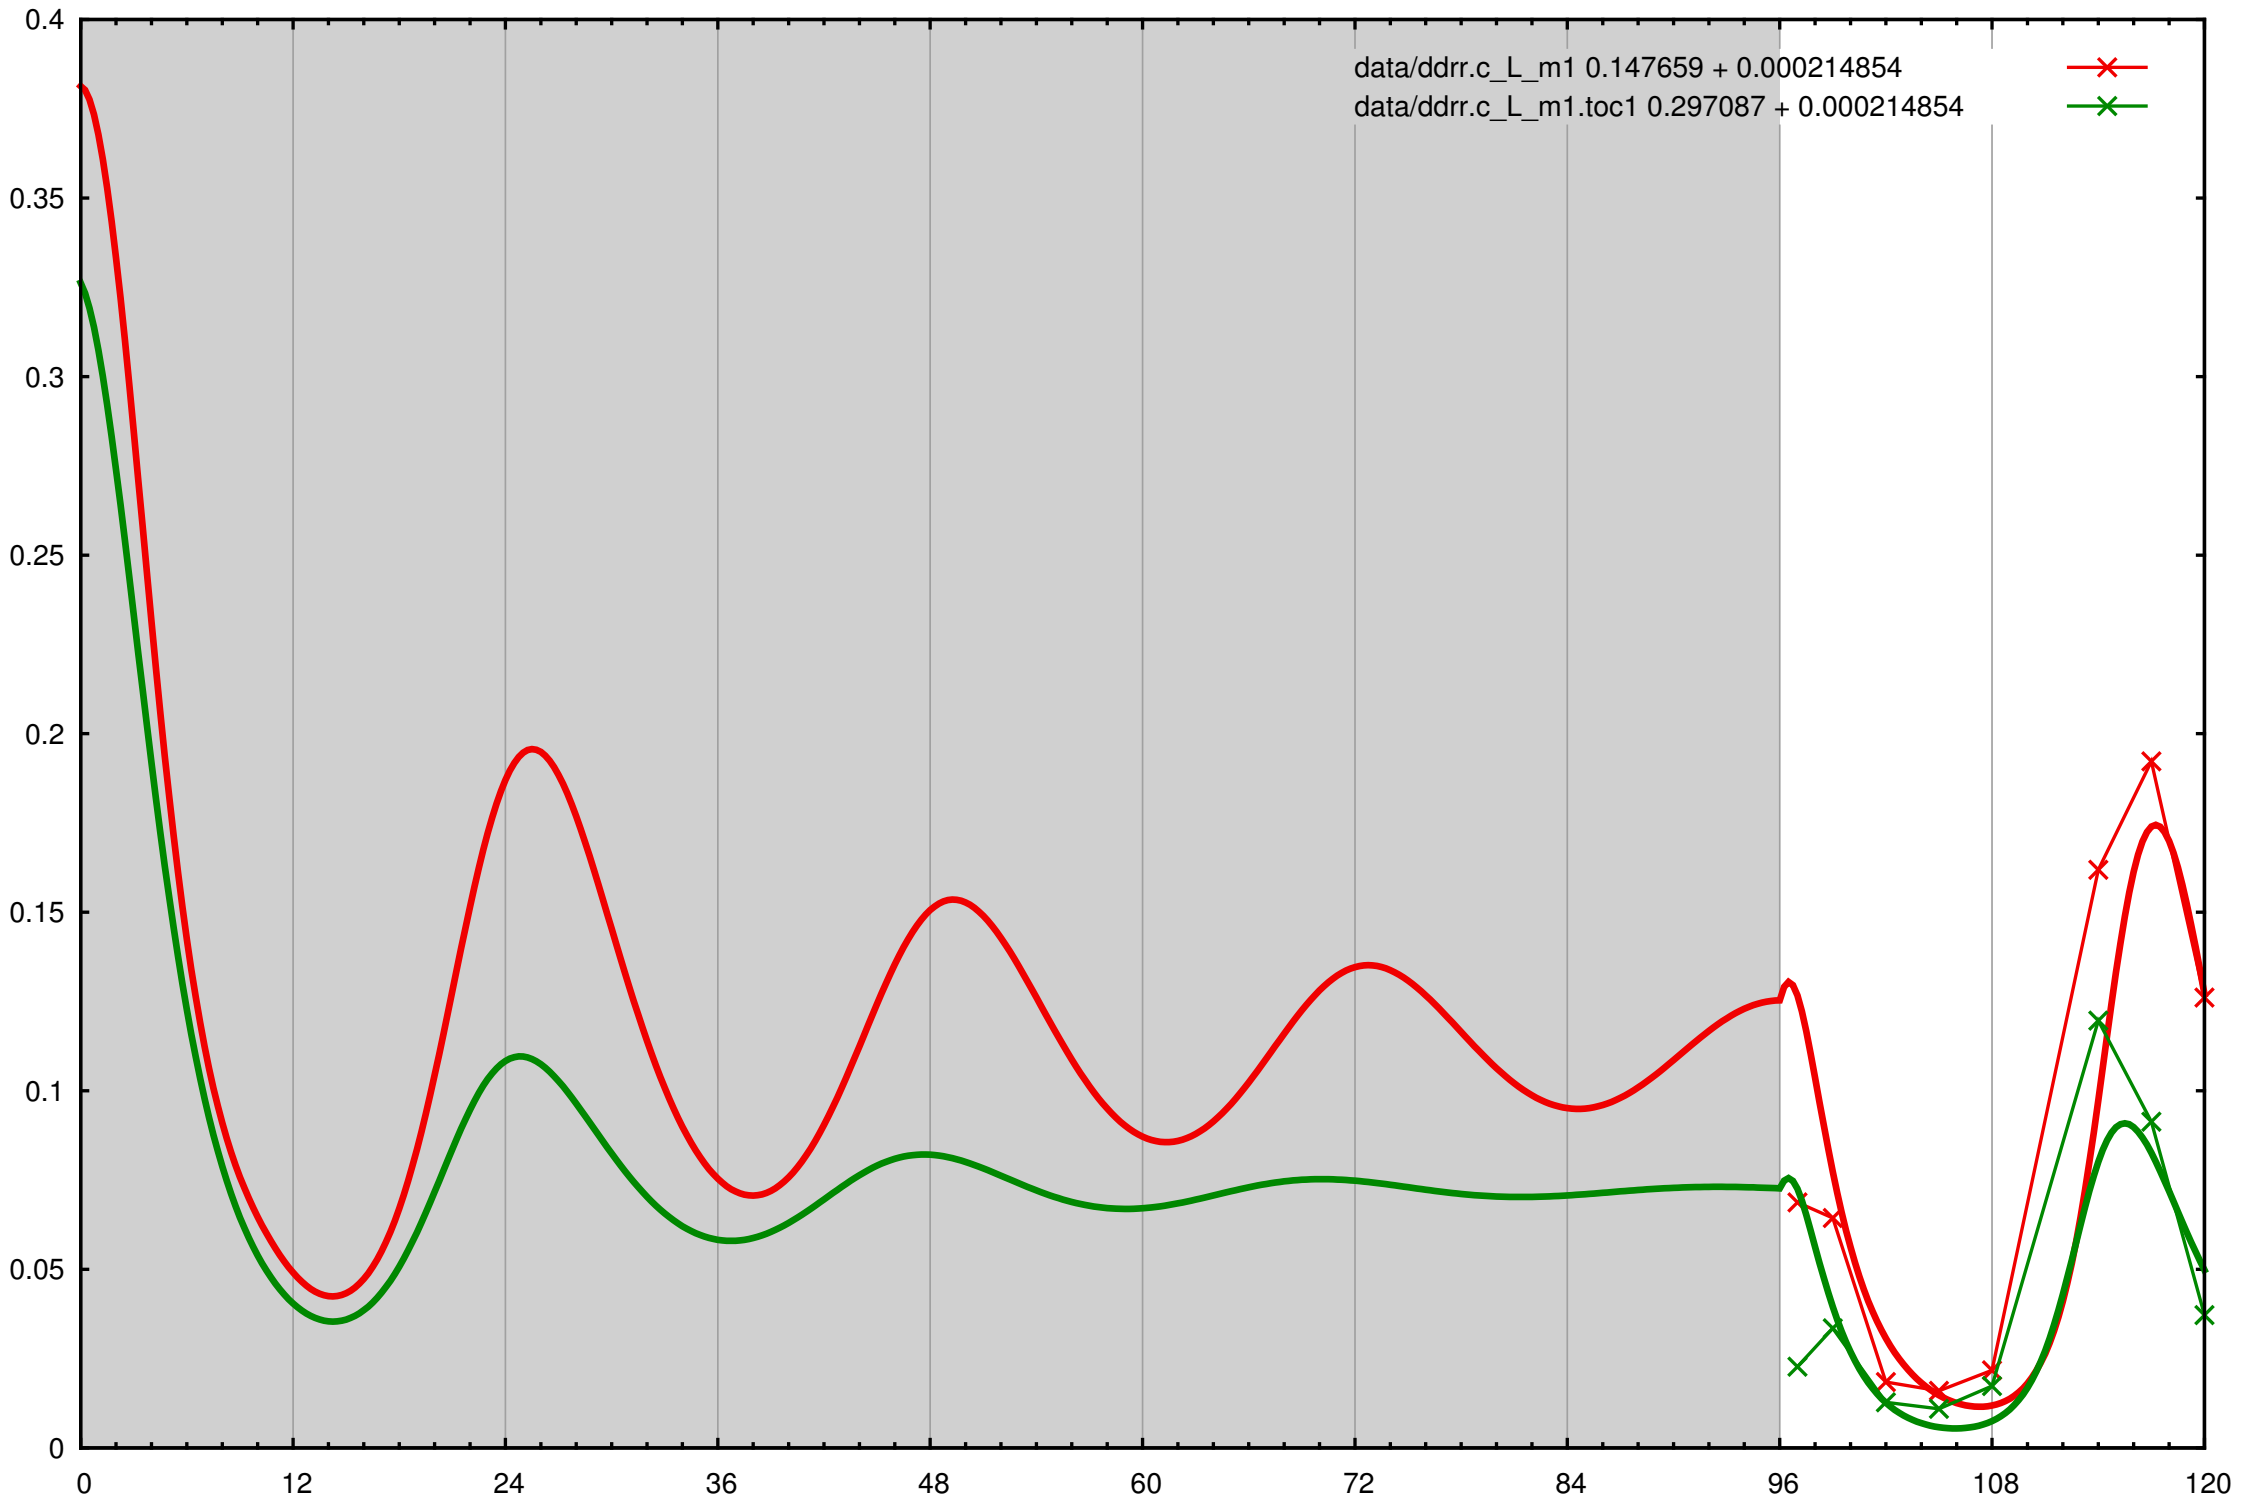

Scale group 175, scost 0.0107923

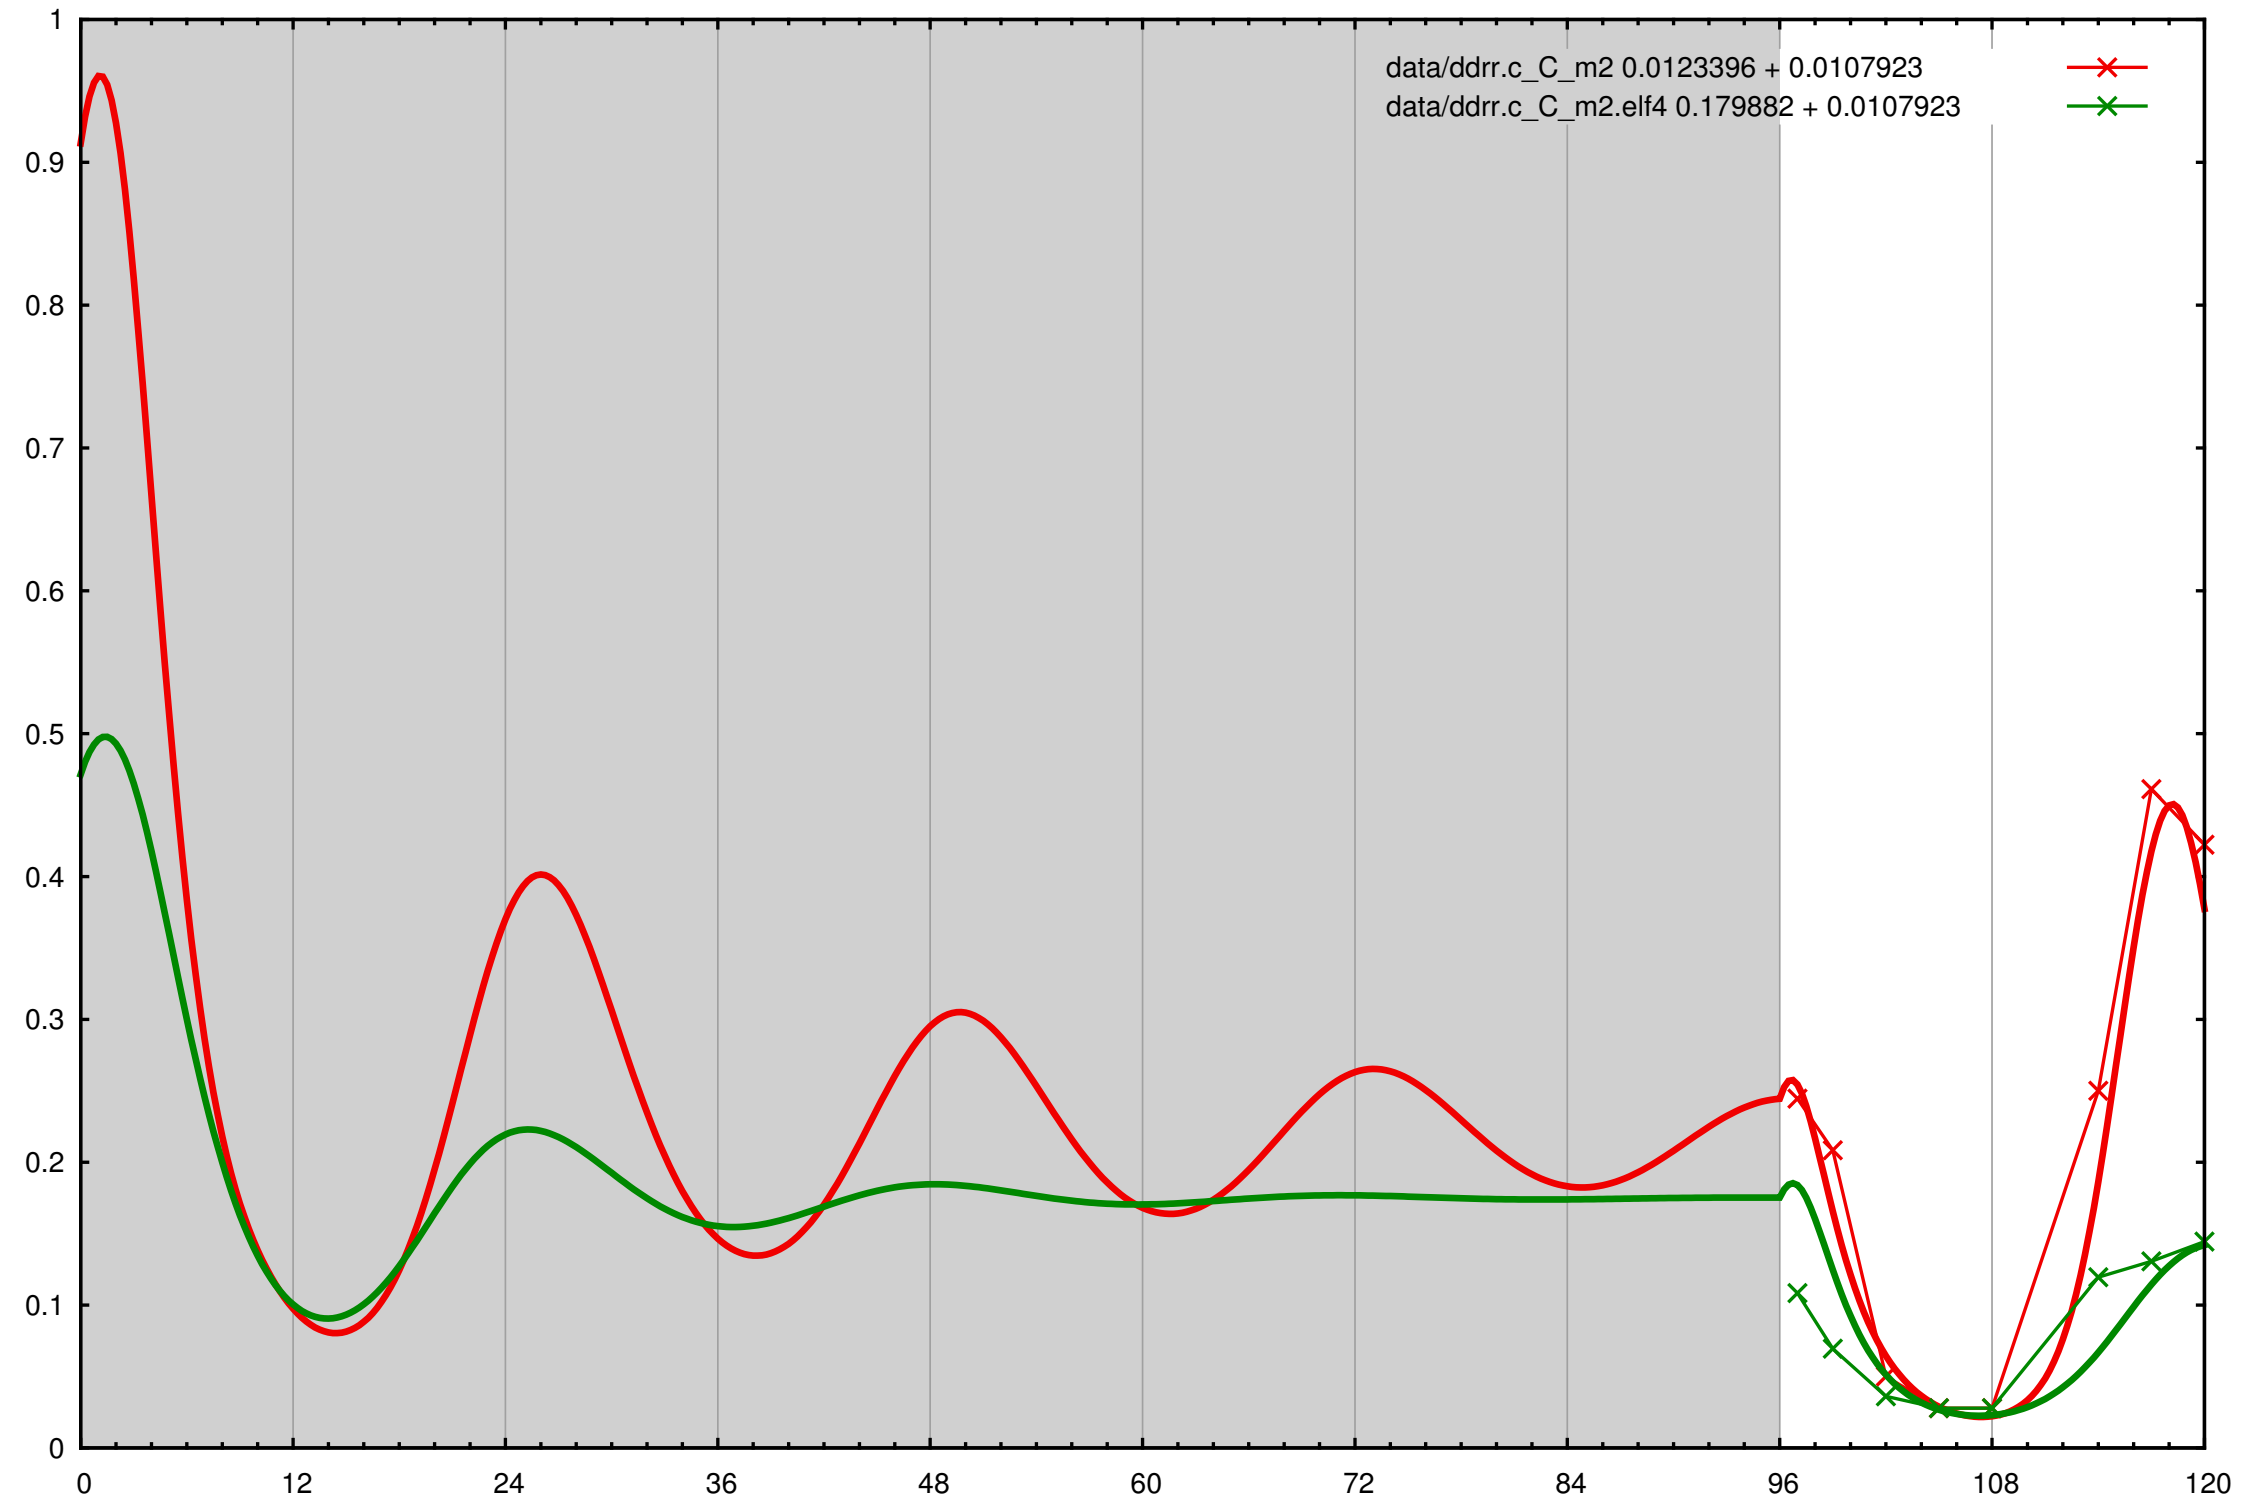

Scale group 176, scost 0.220816

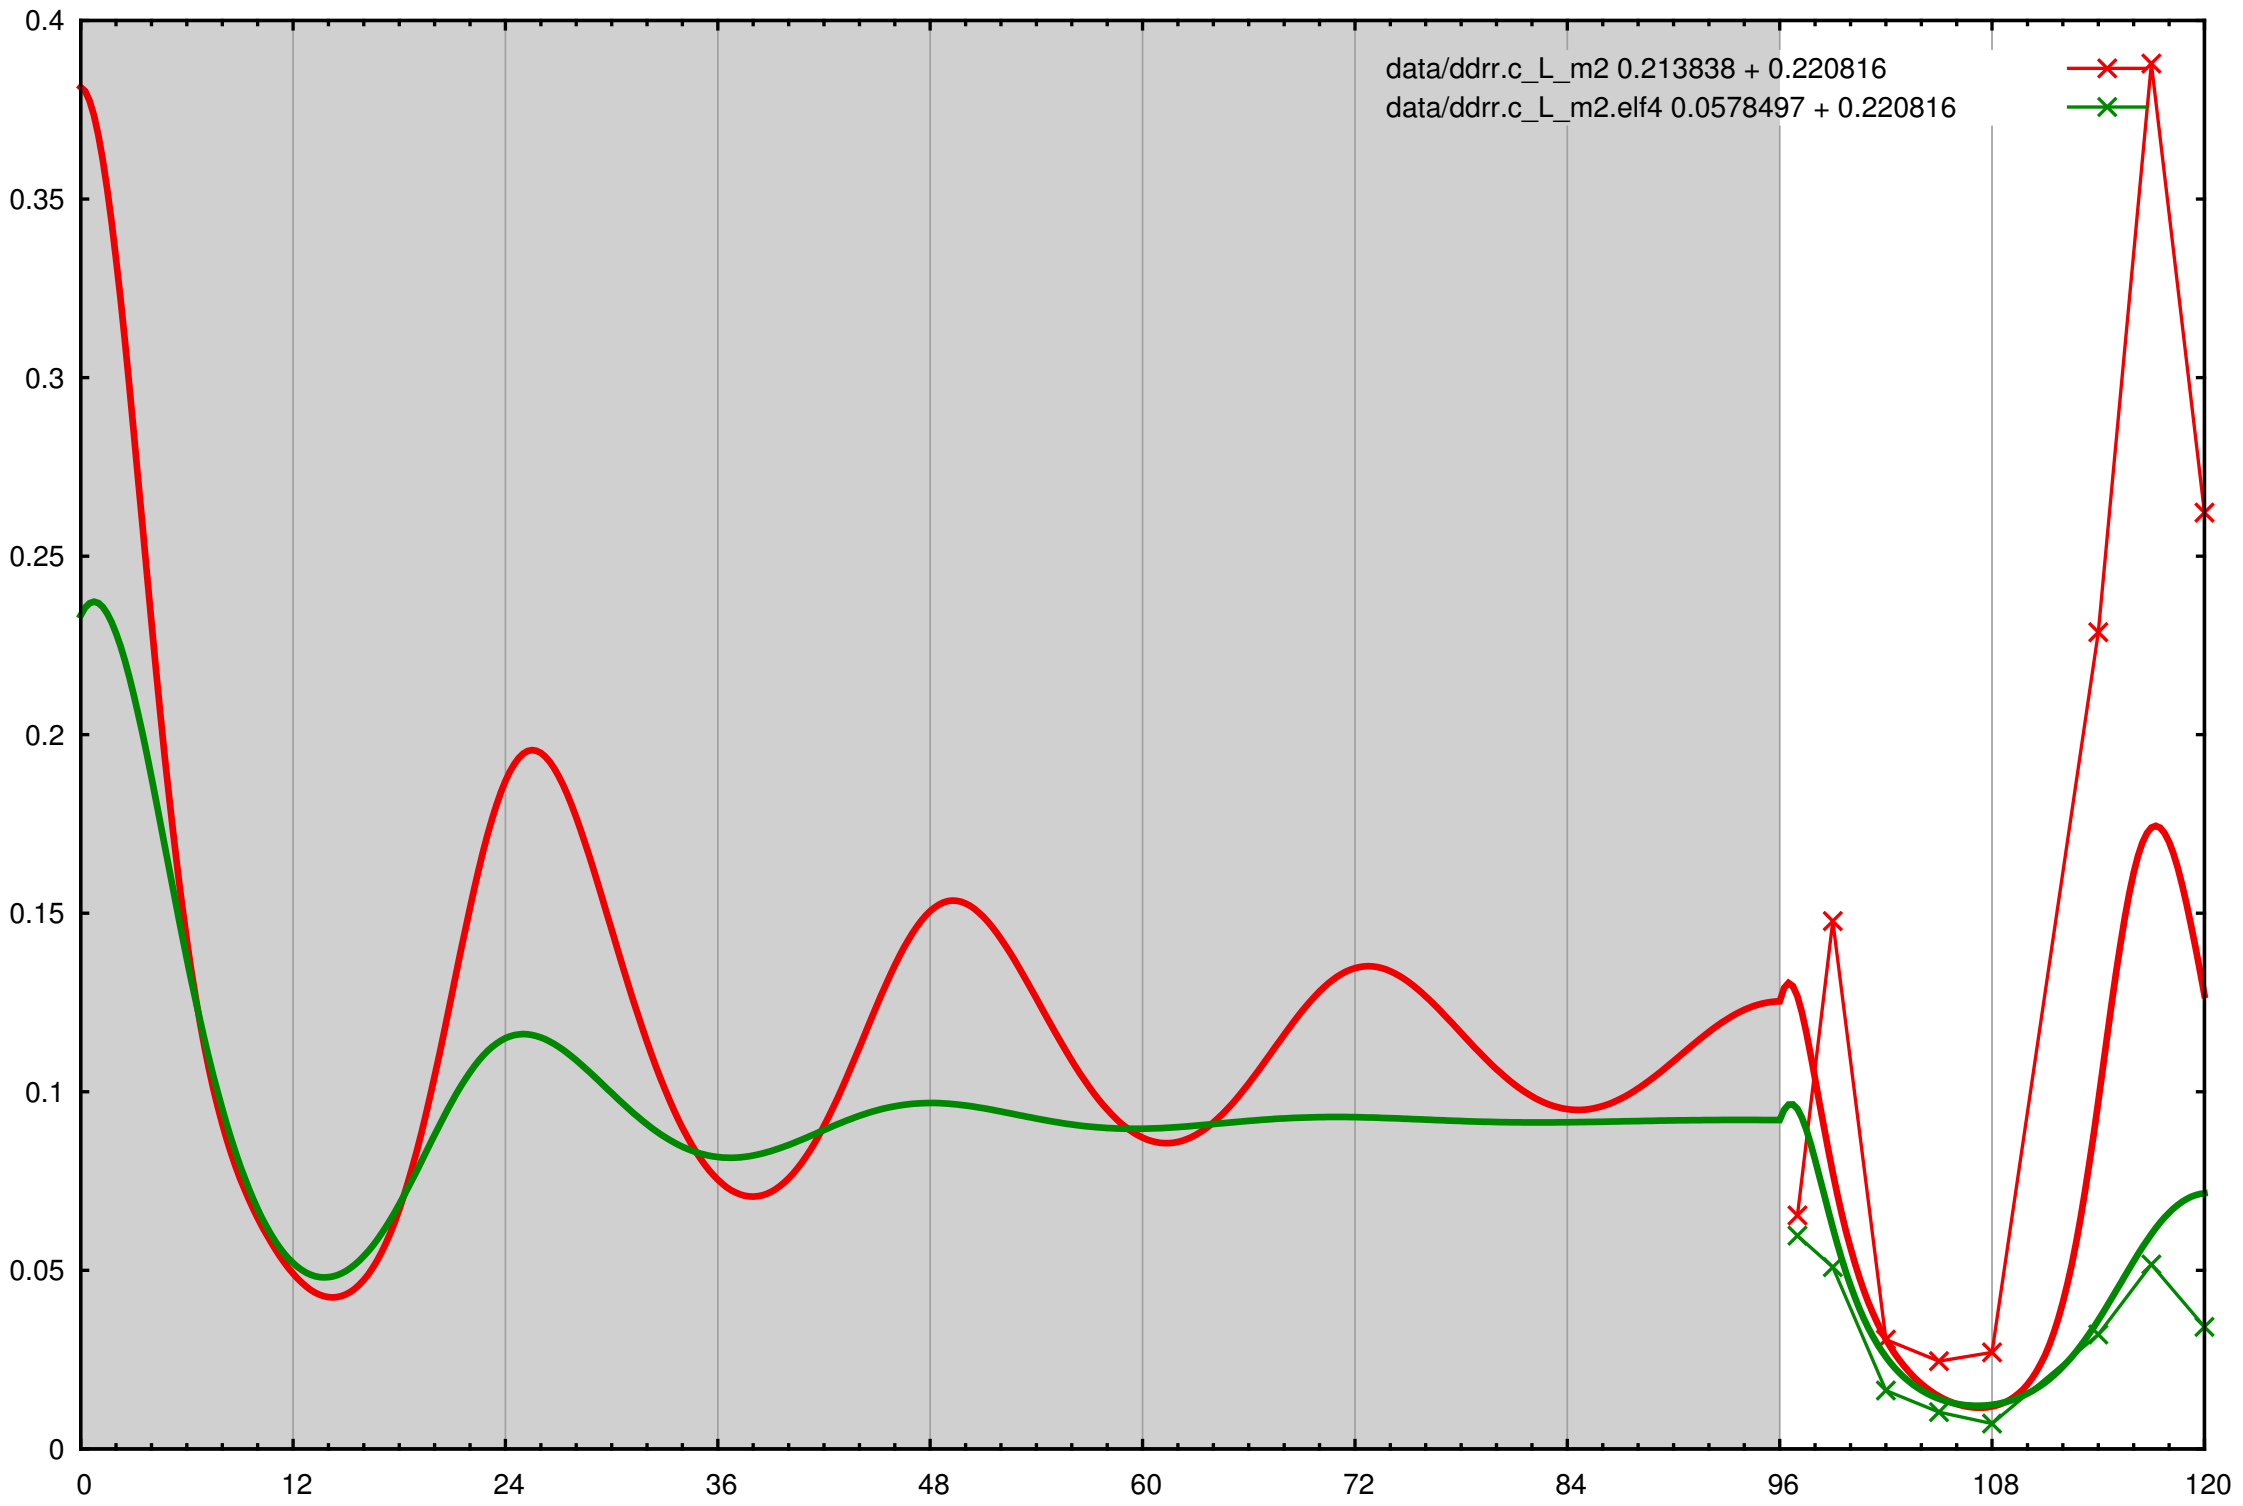



Scale group 177, scost 0.0217163

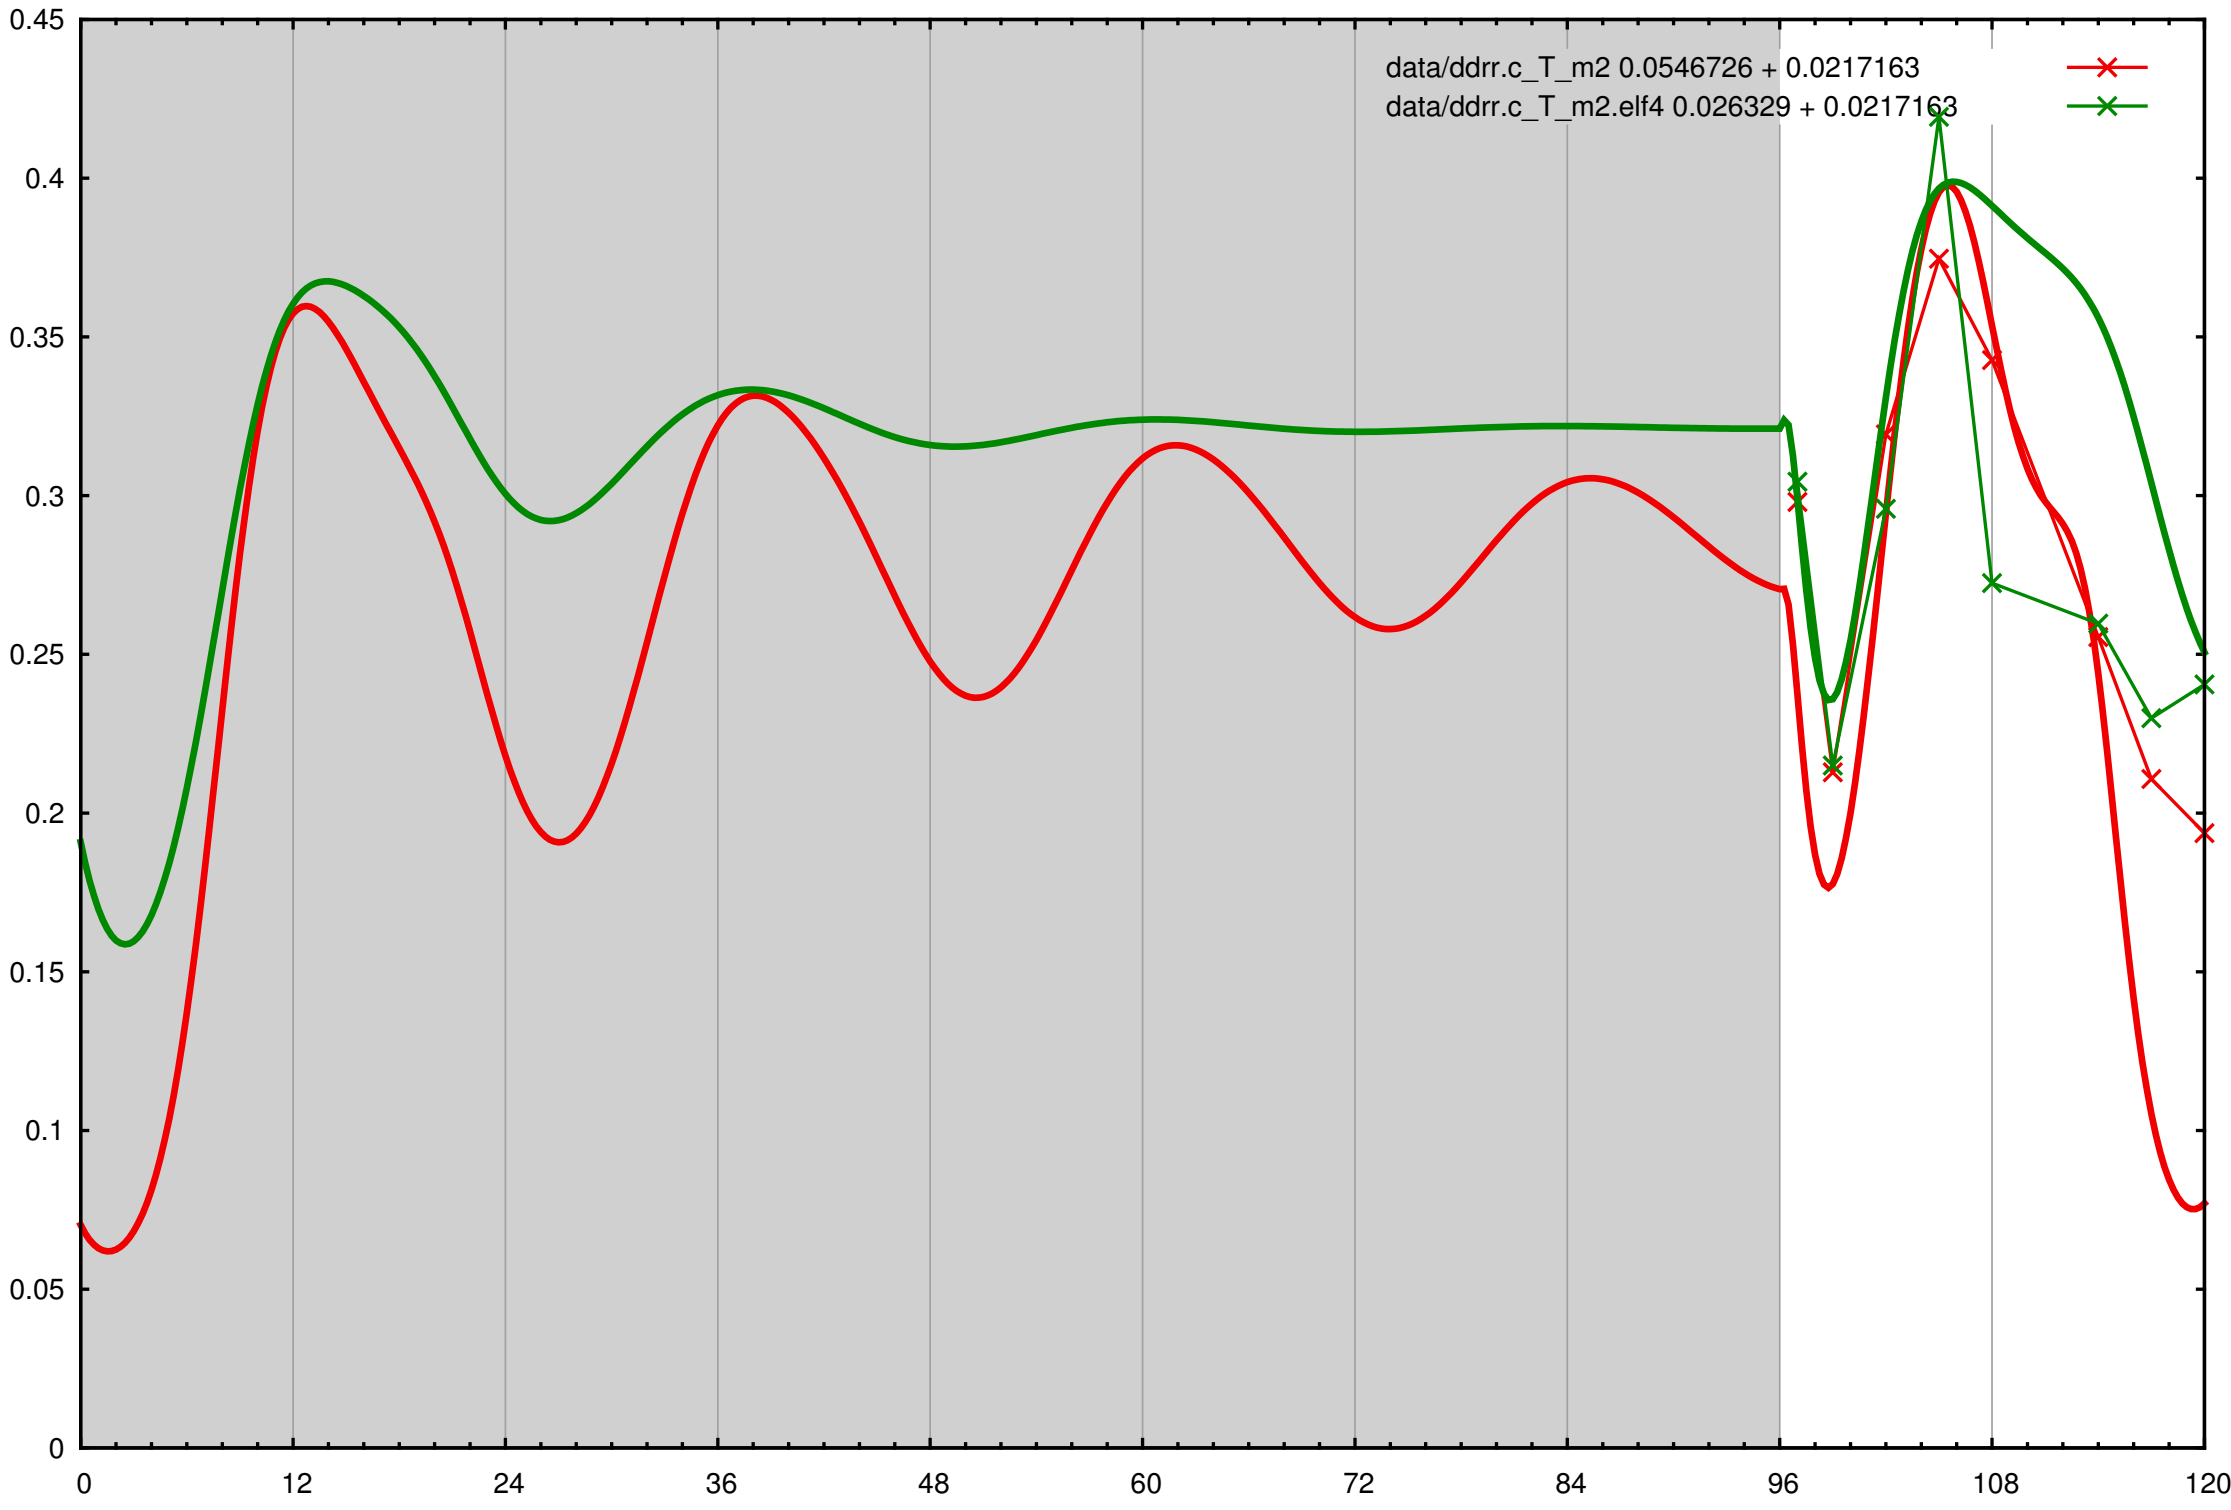

Scale group 178, scost 0.112783

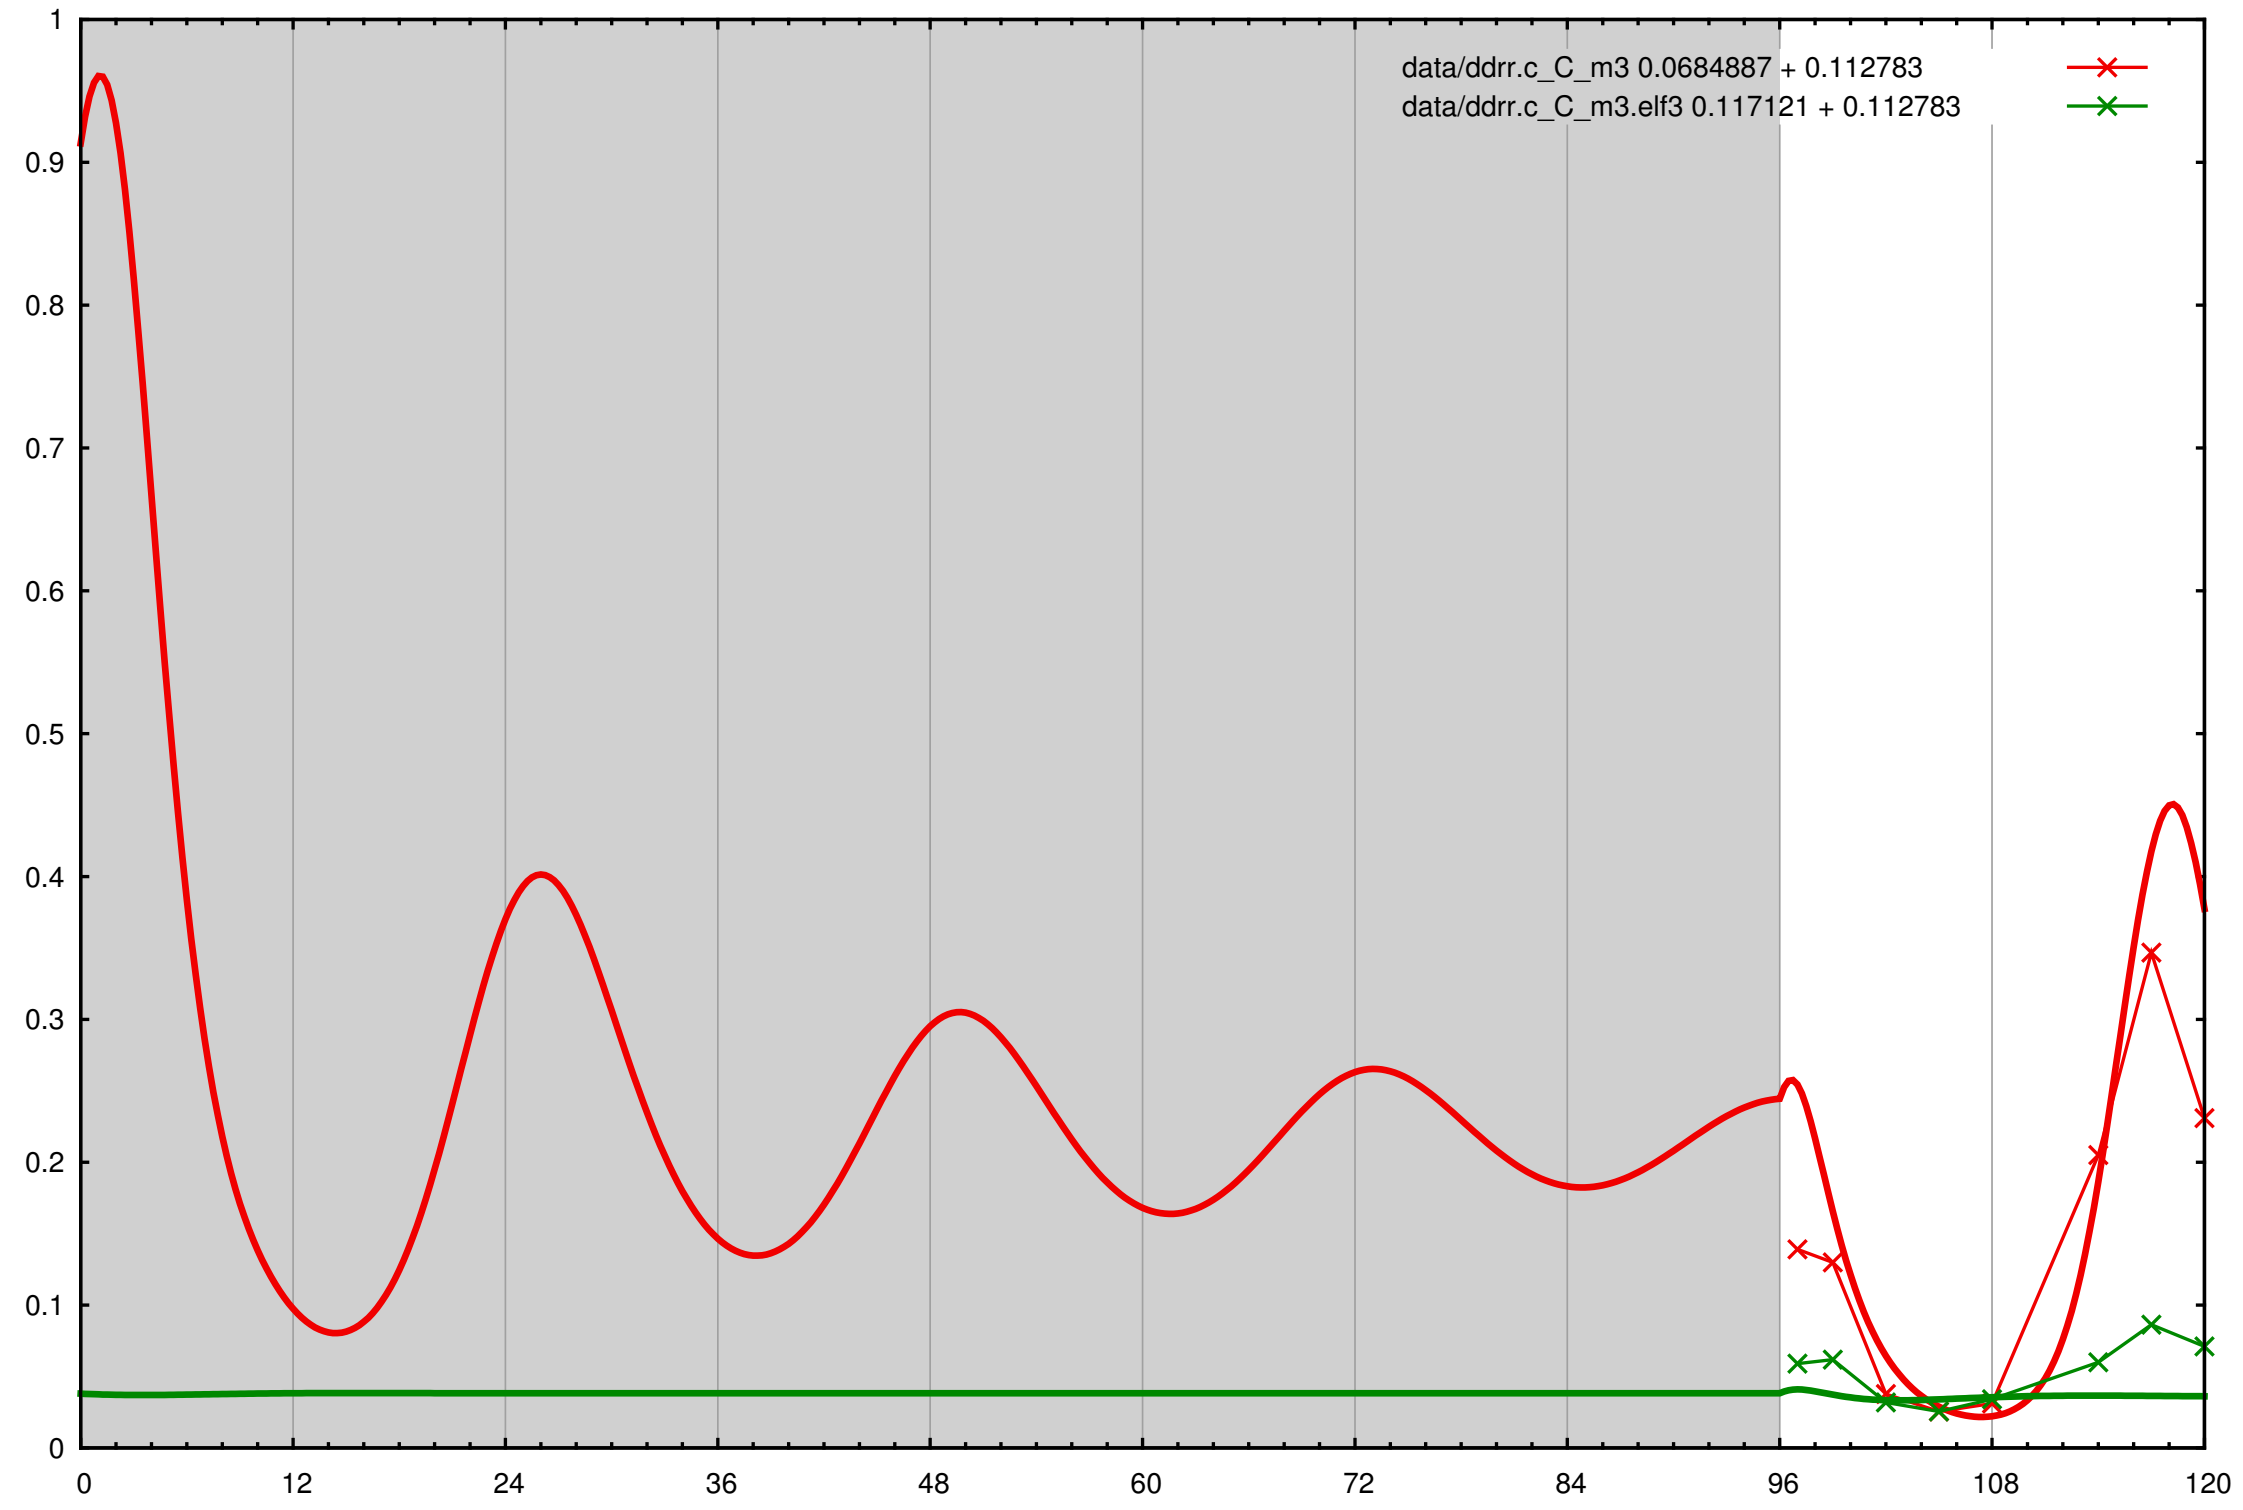

Scale group 179, scost 0.000581673

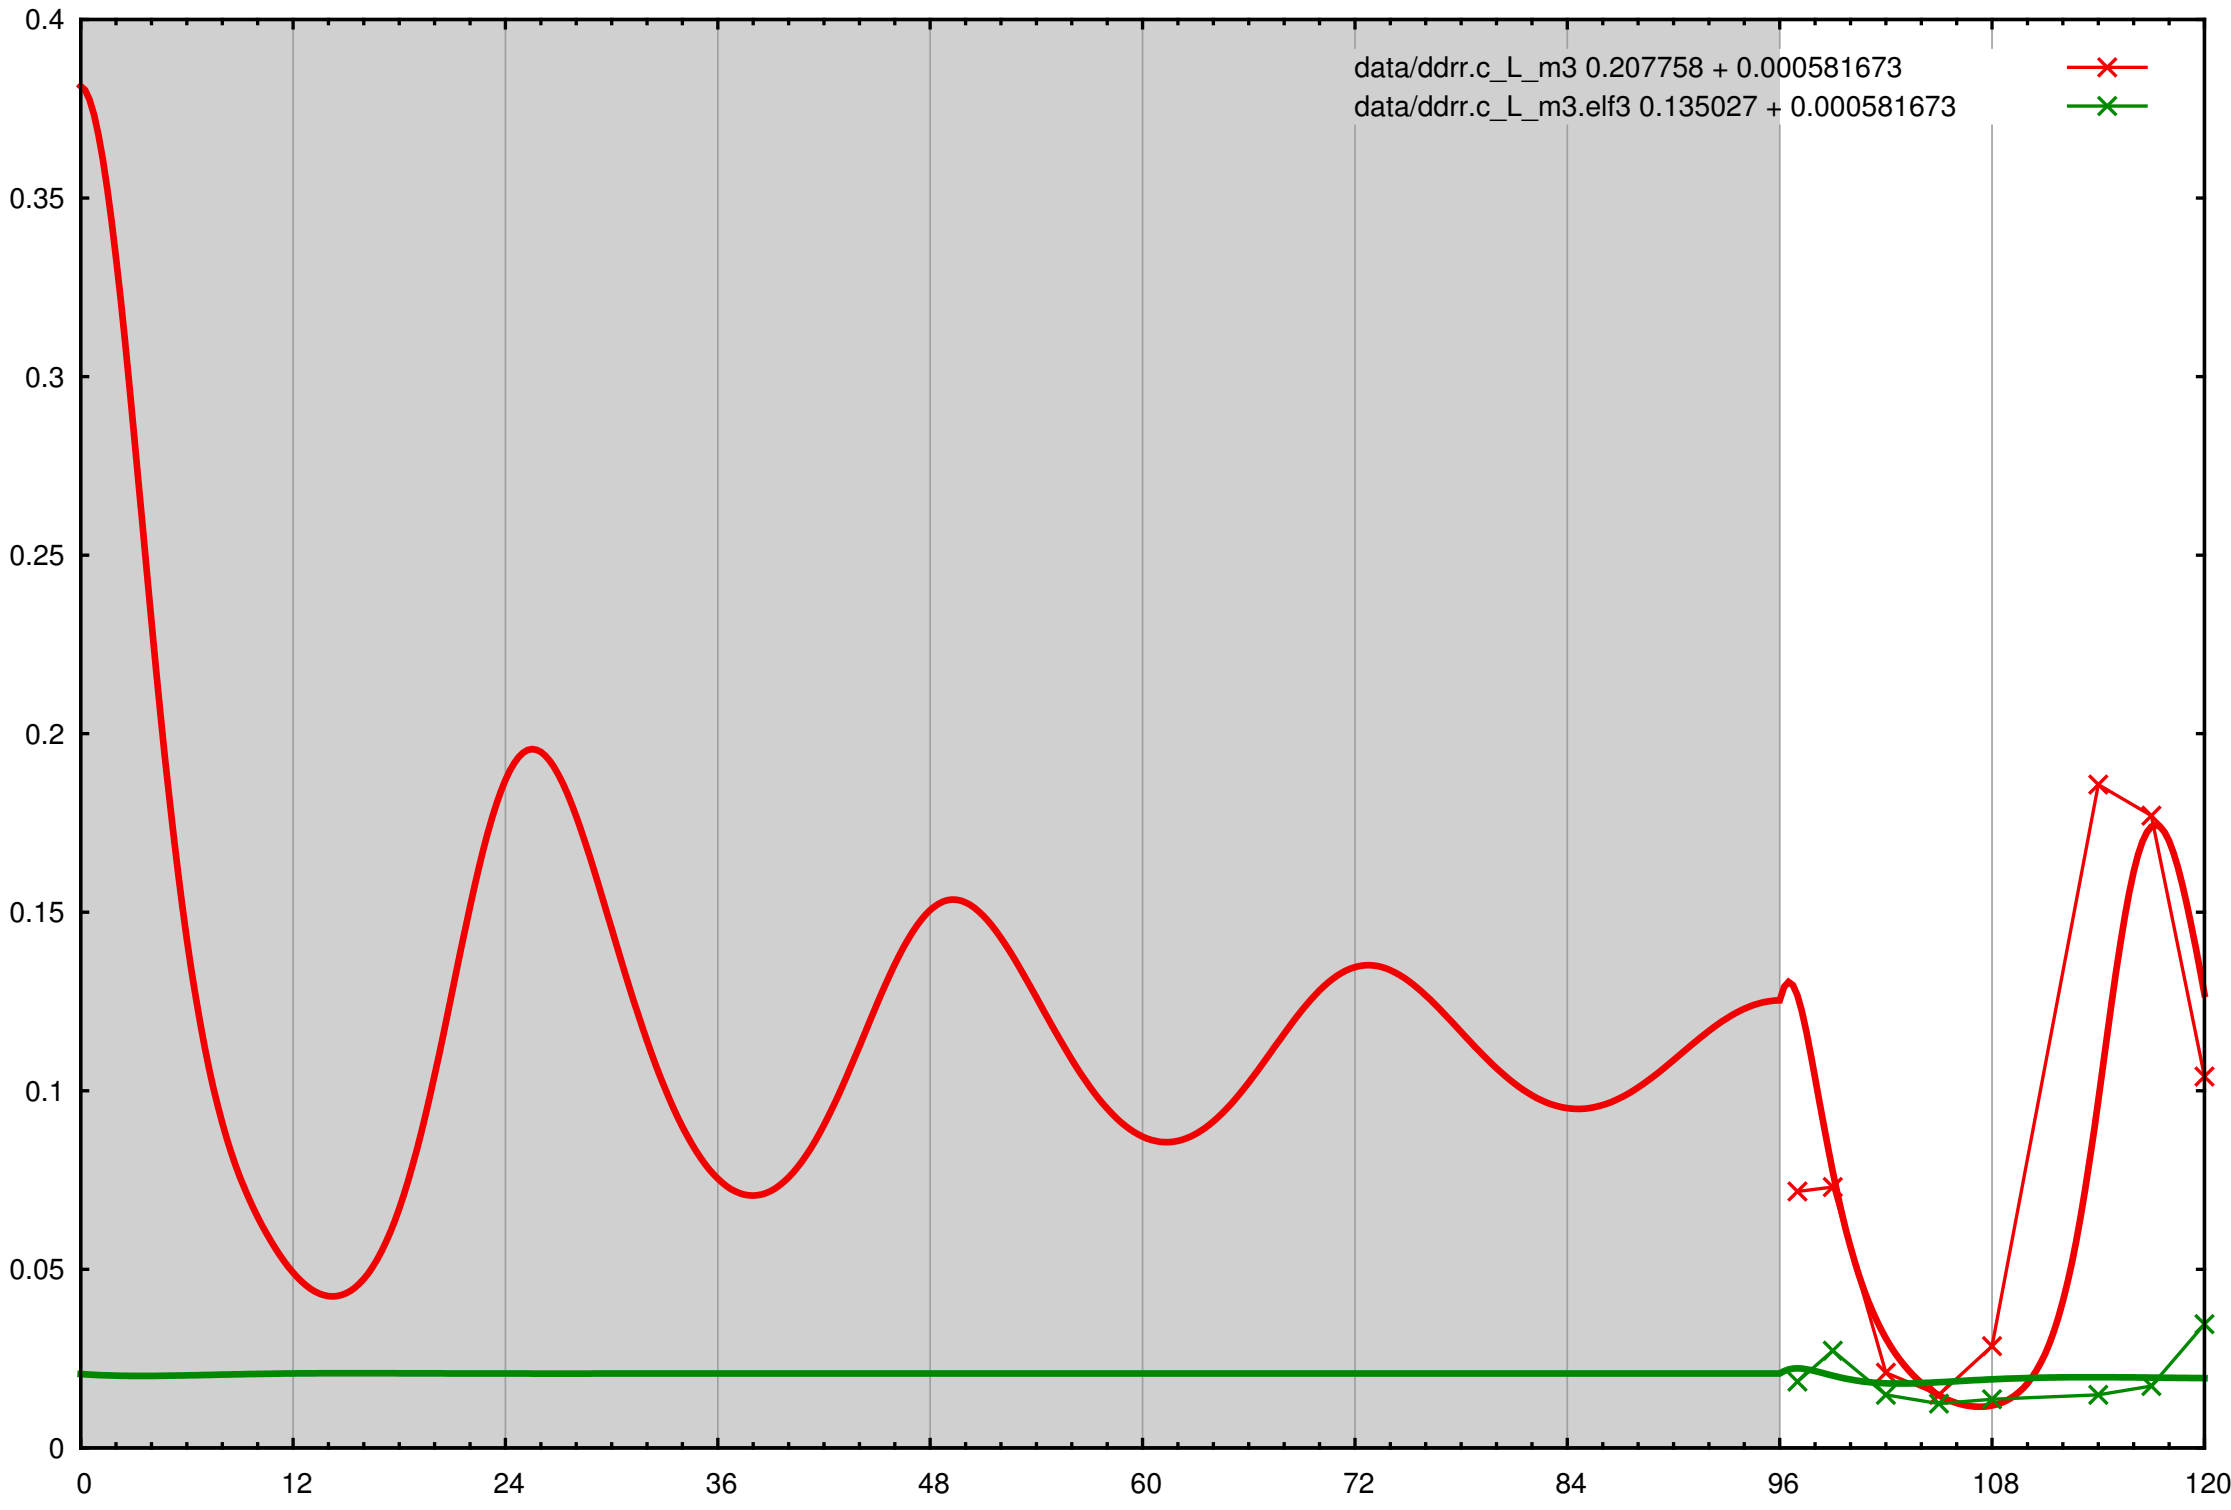

Scale group 180, scost 0.0147319

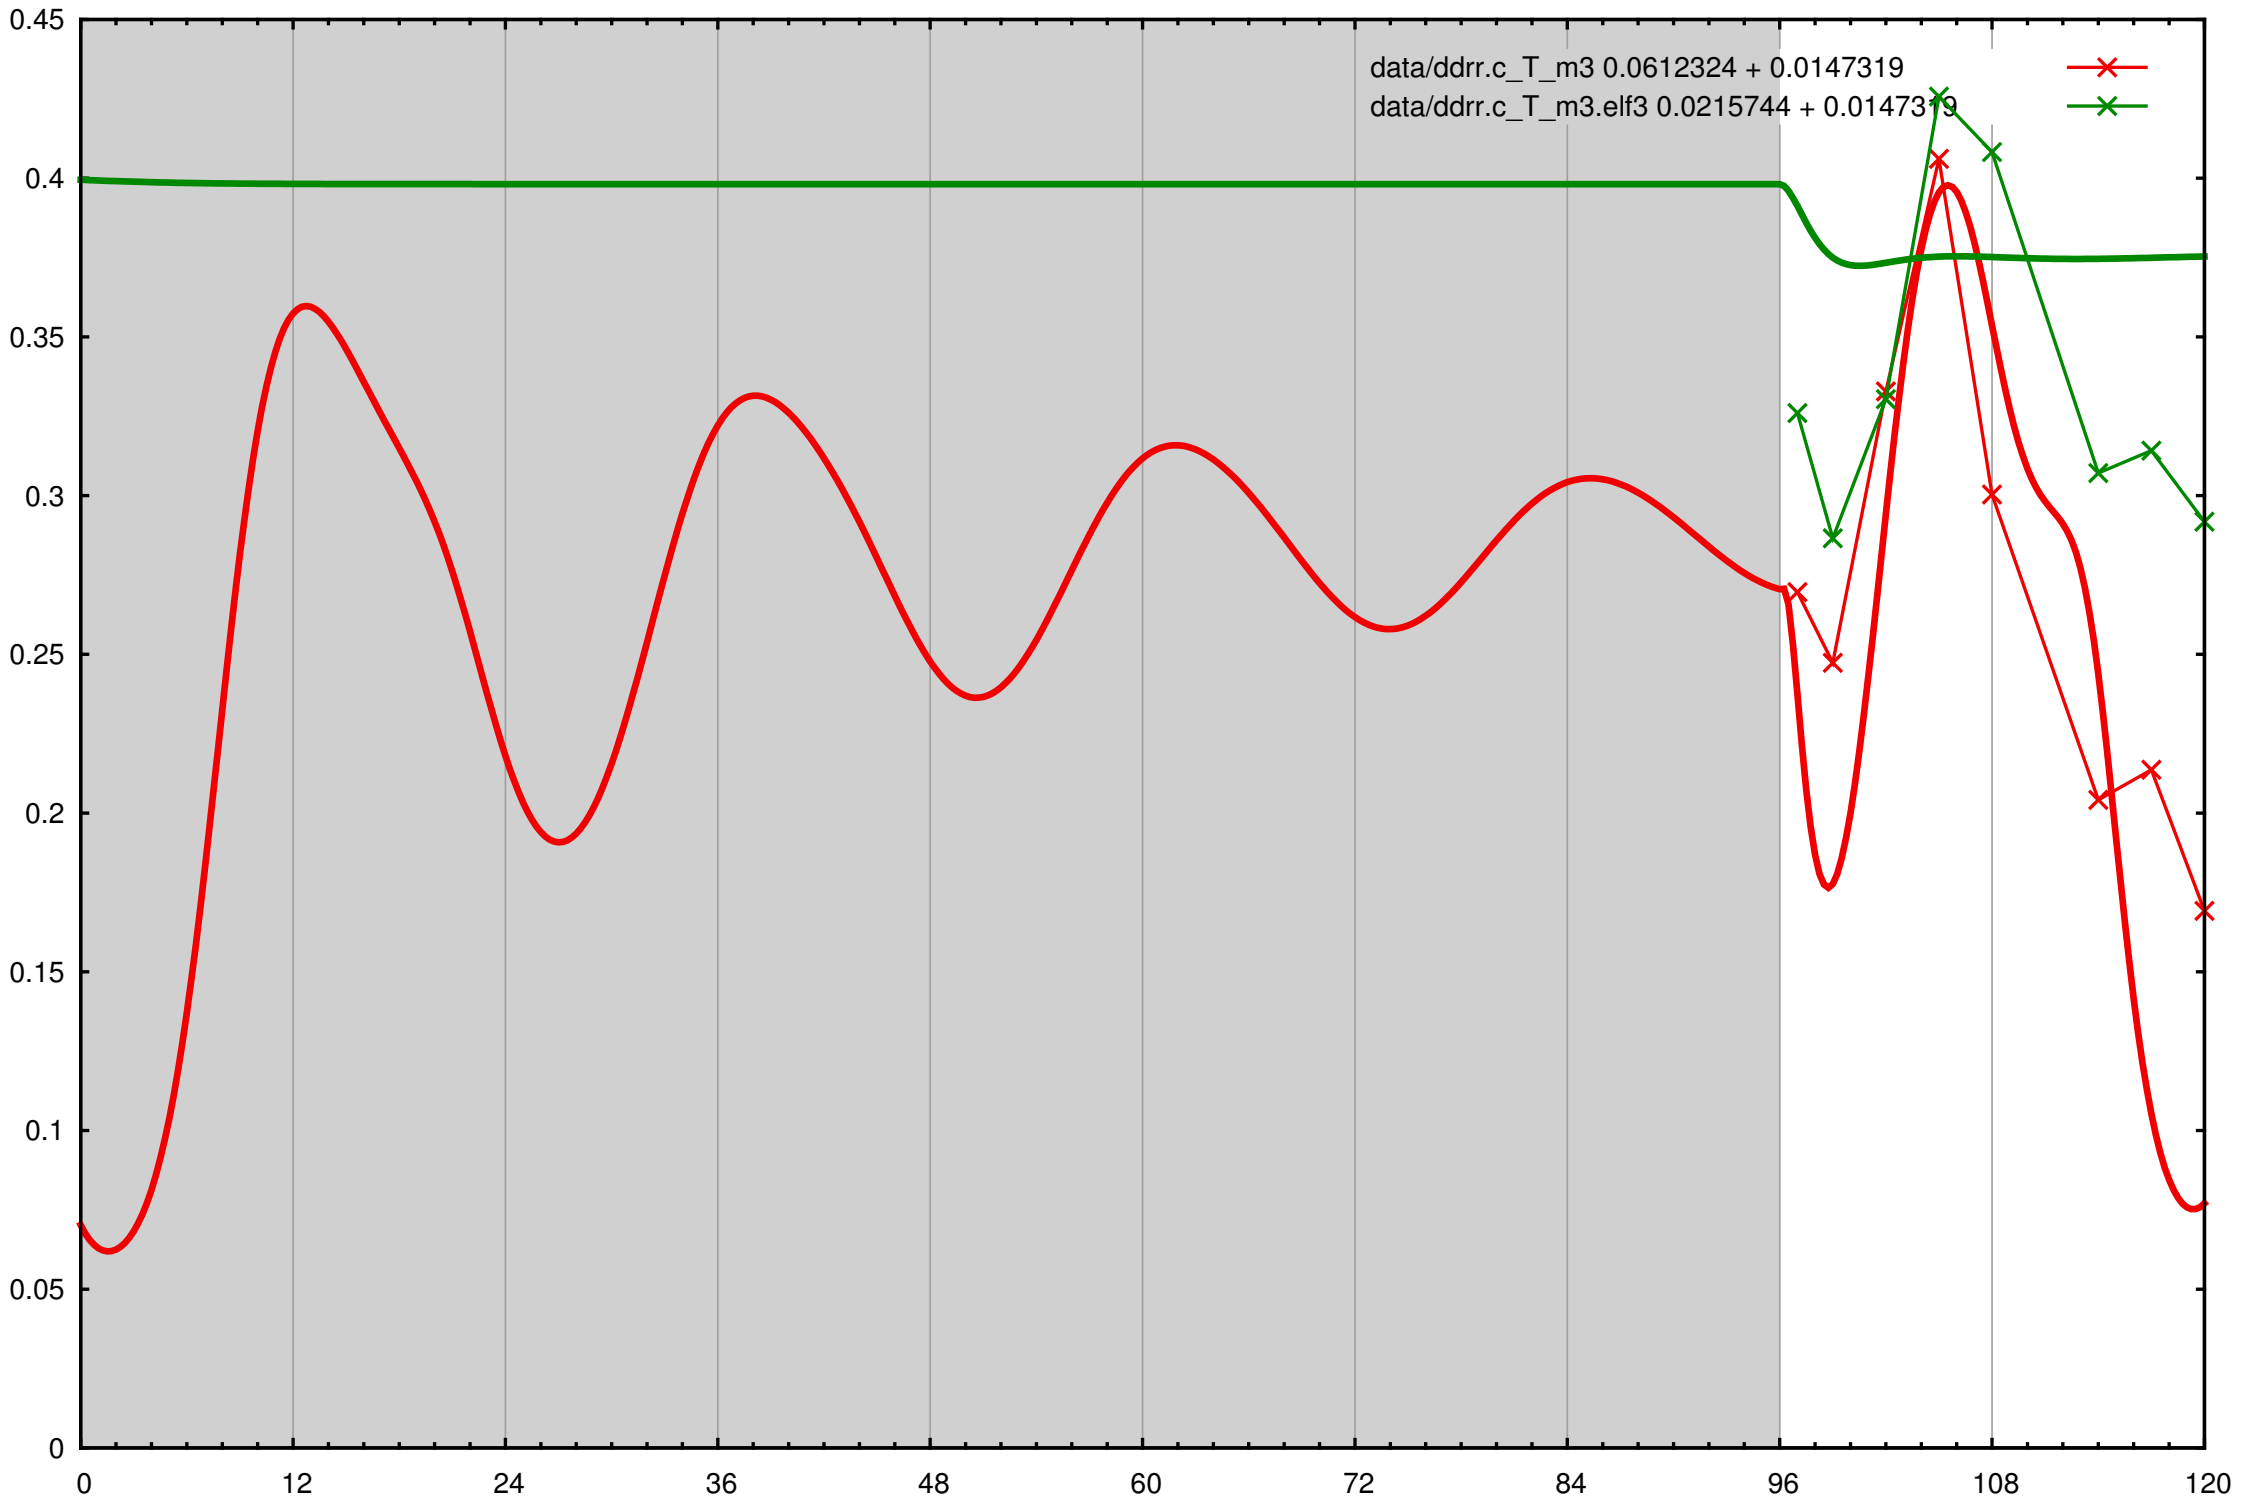

Scale group 181, scost 0.365397

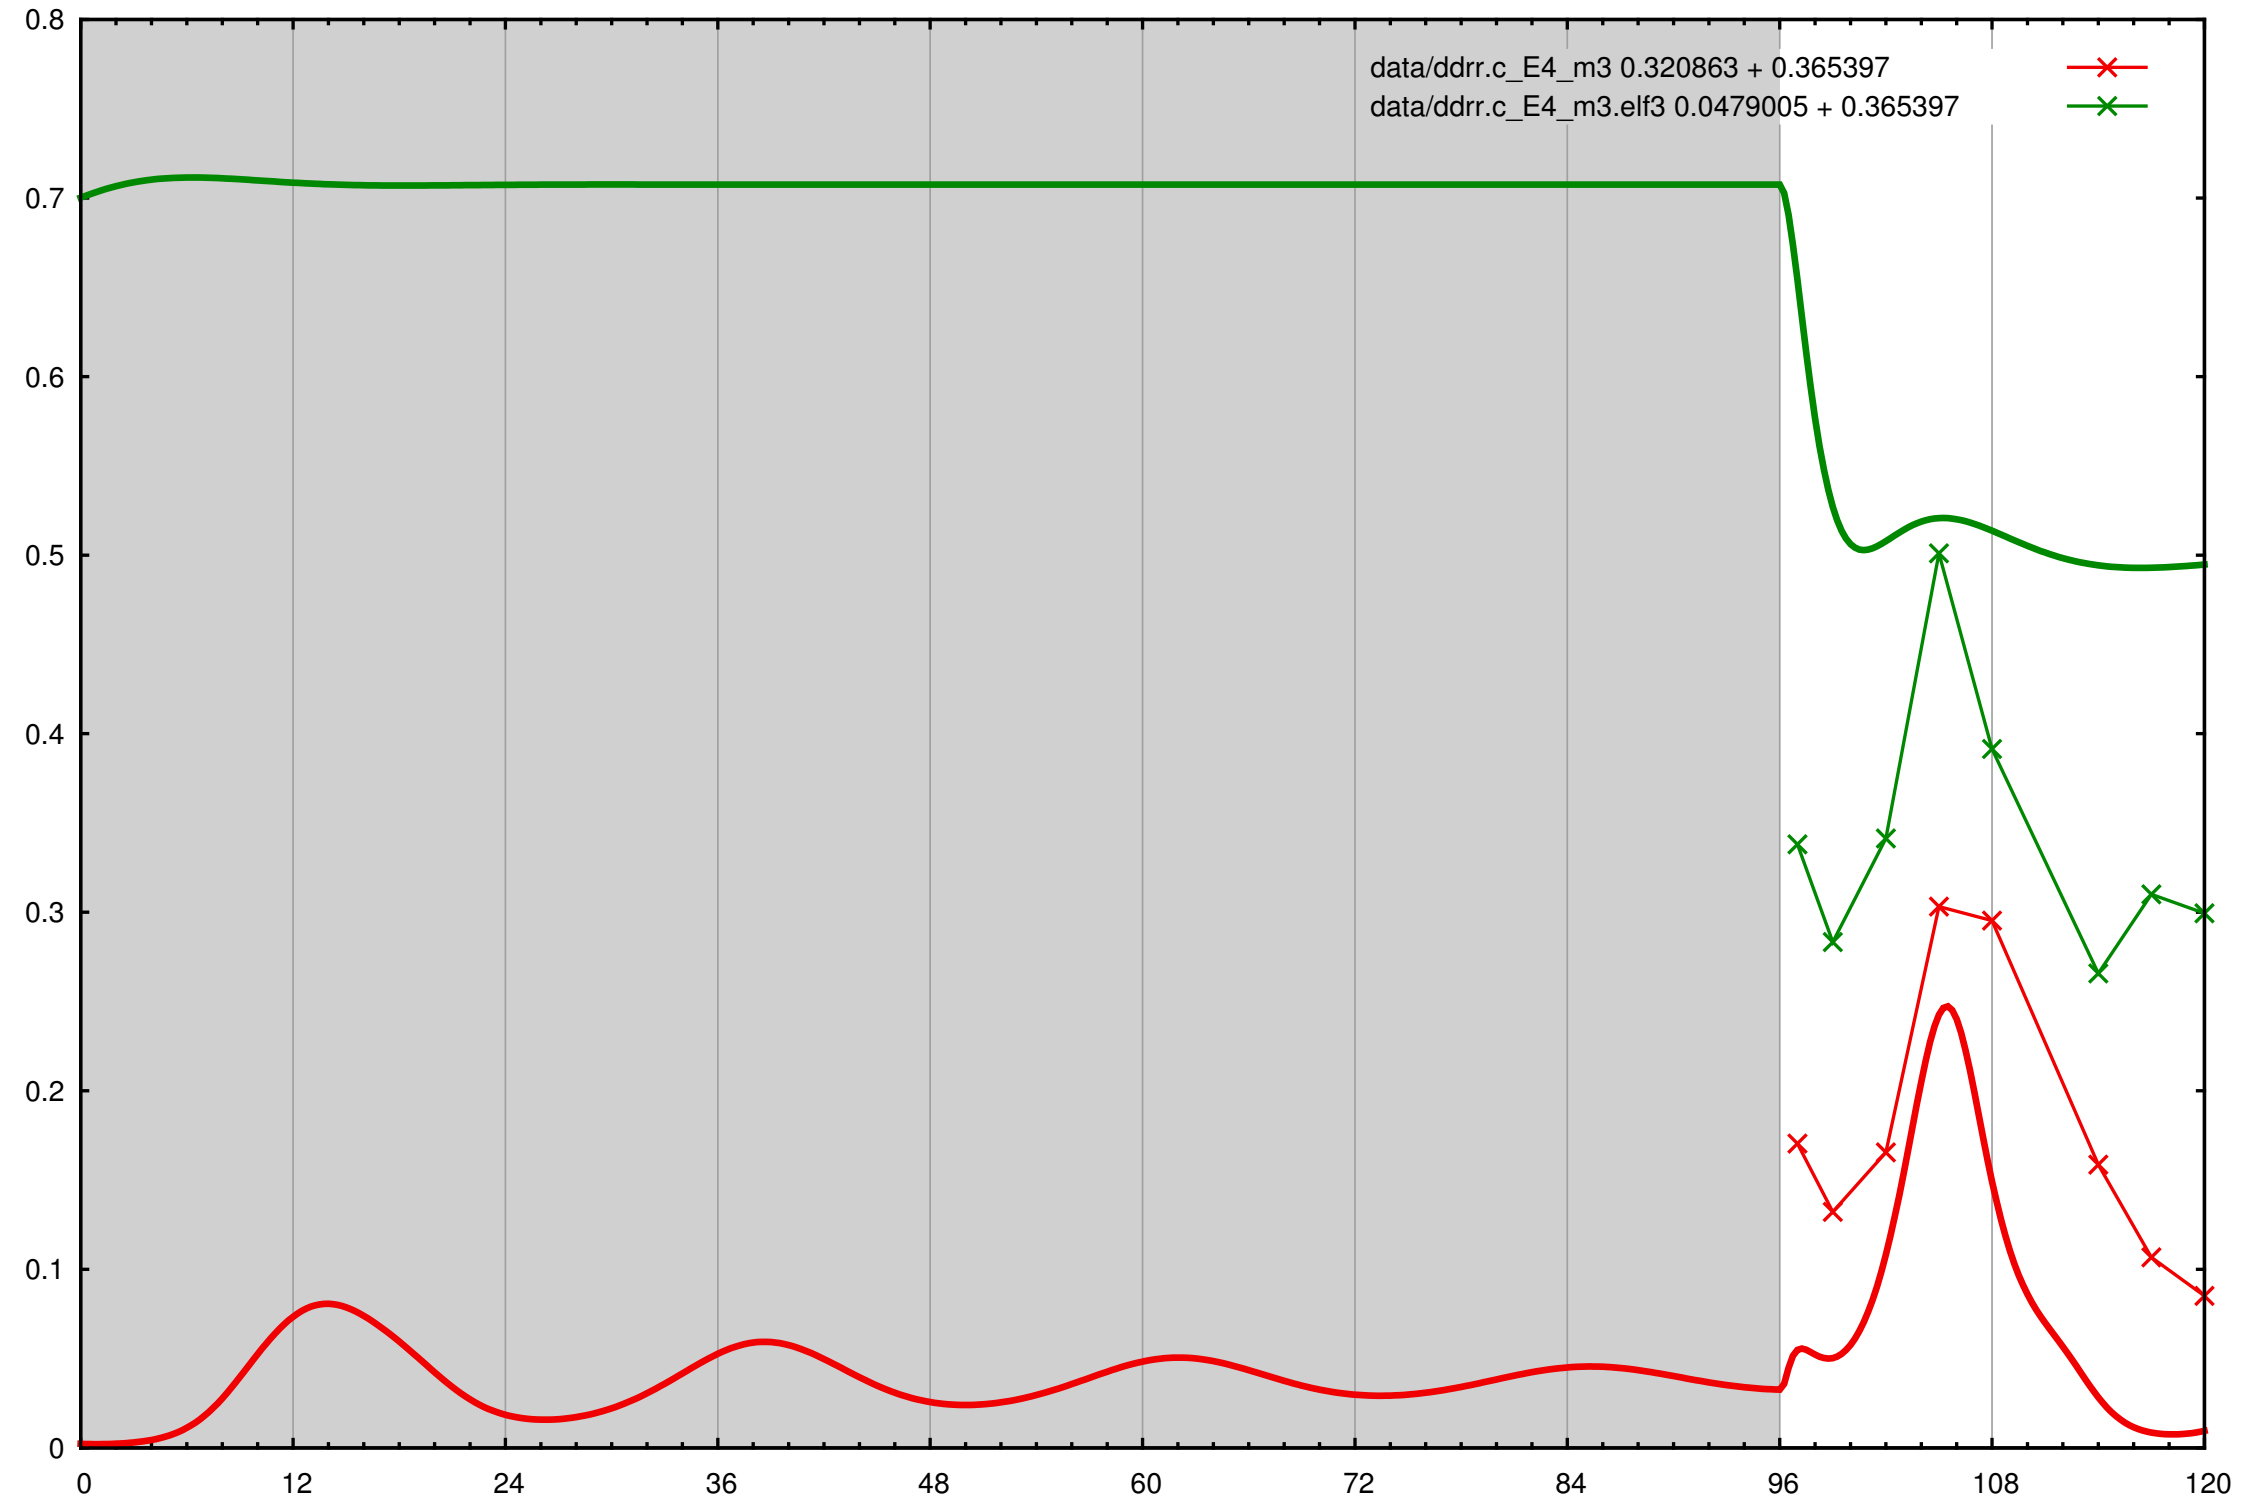

Scale group 182, scost 0.0139329

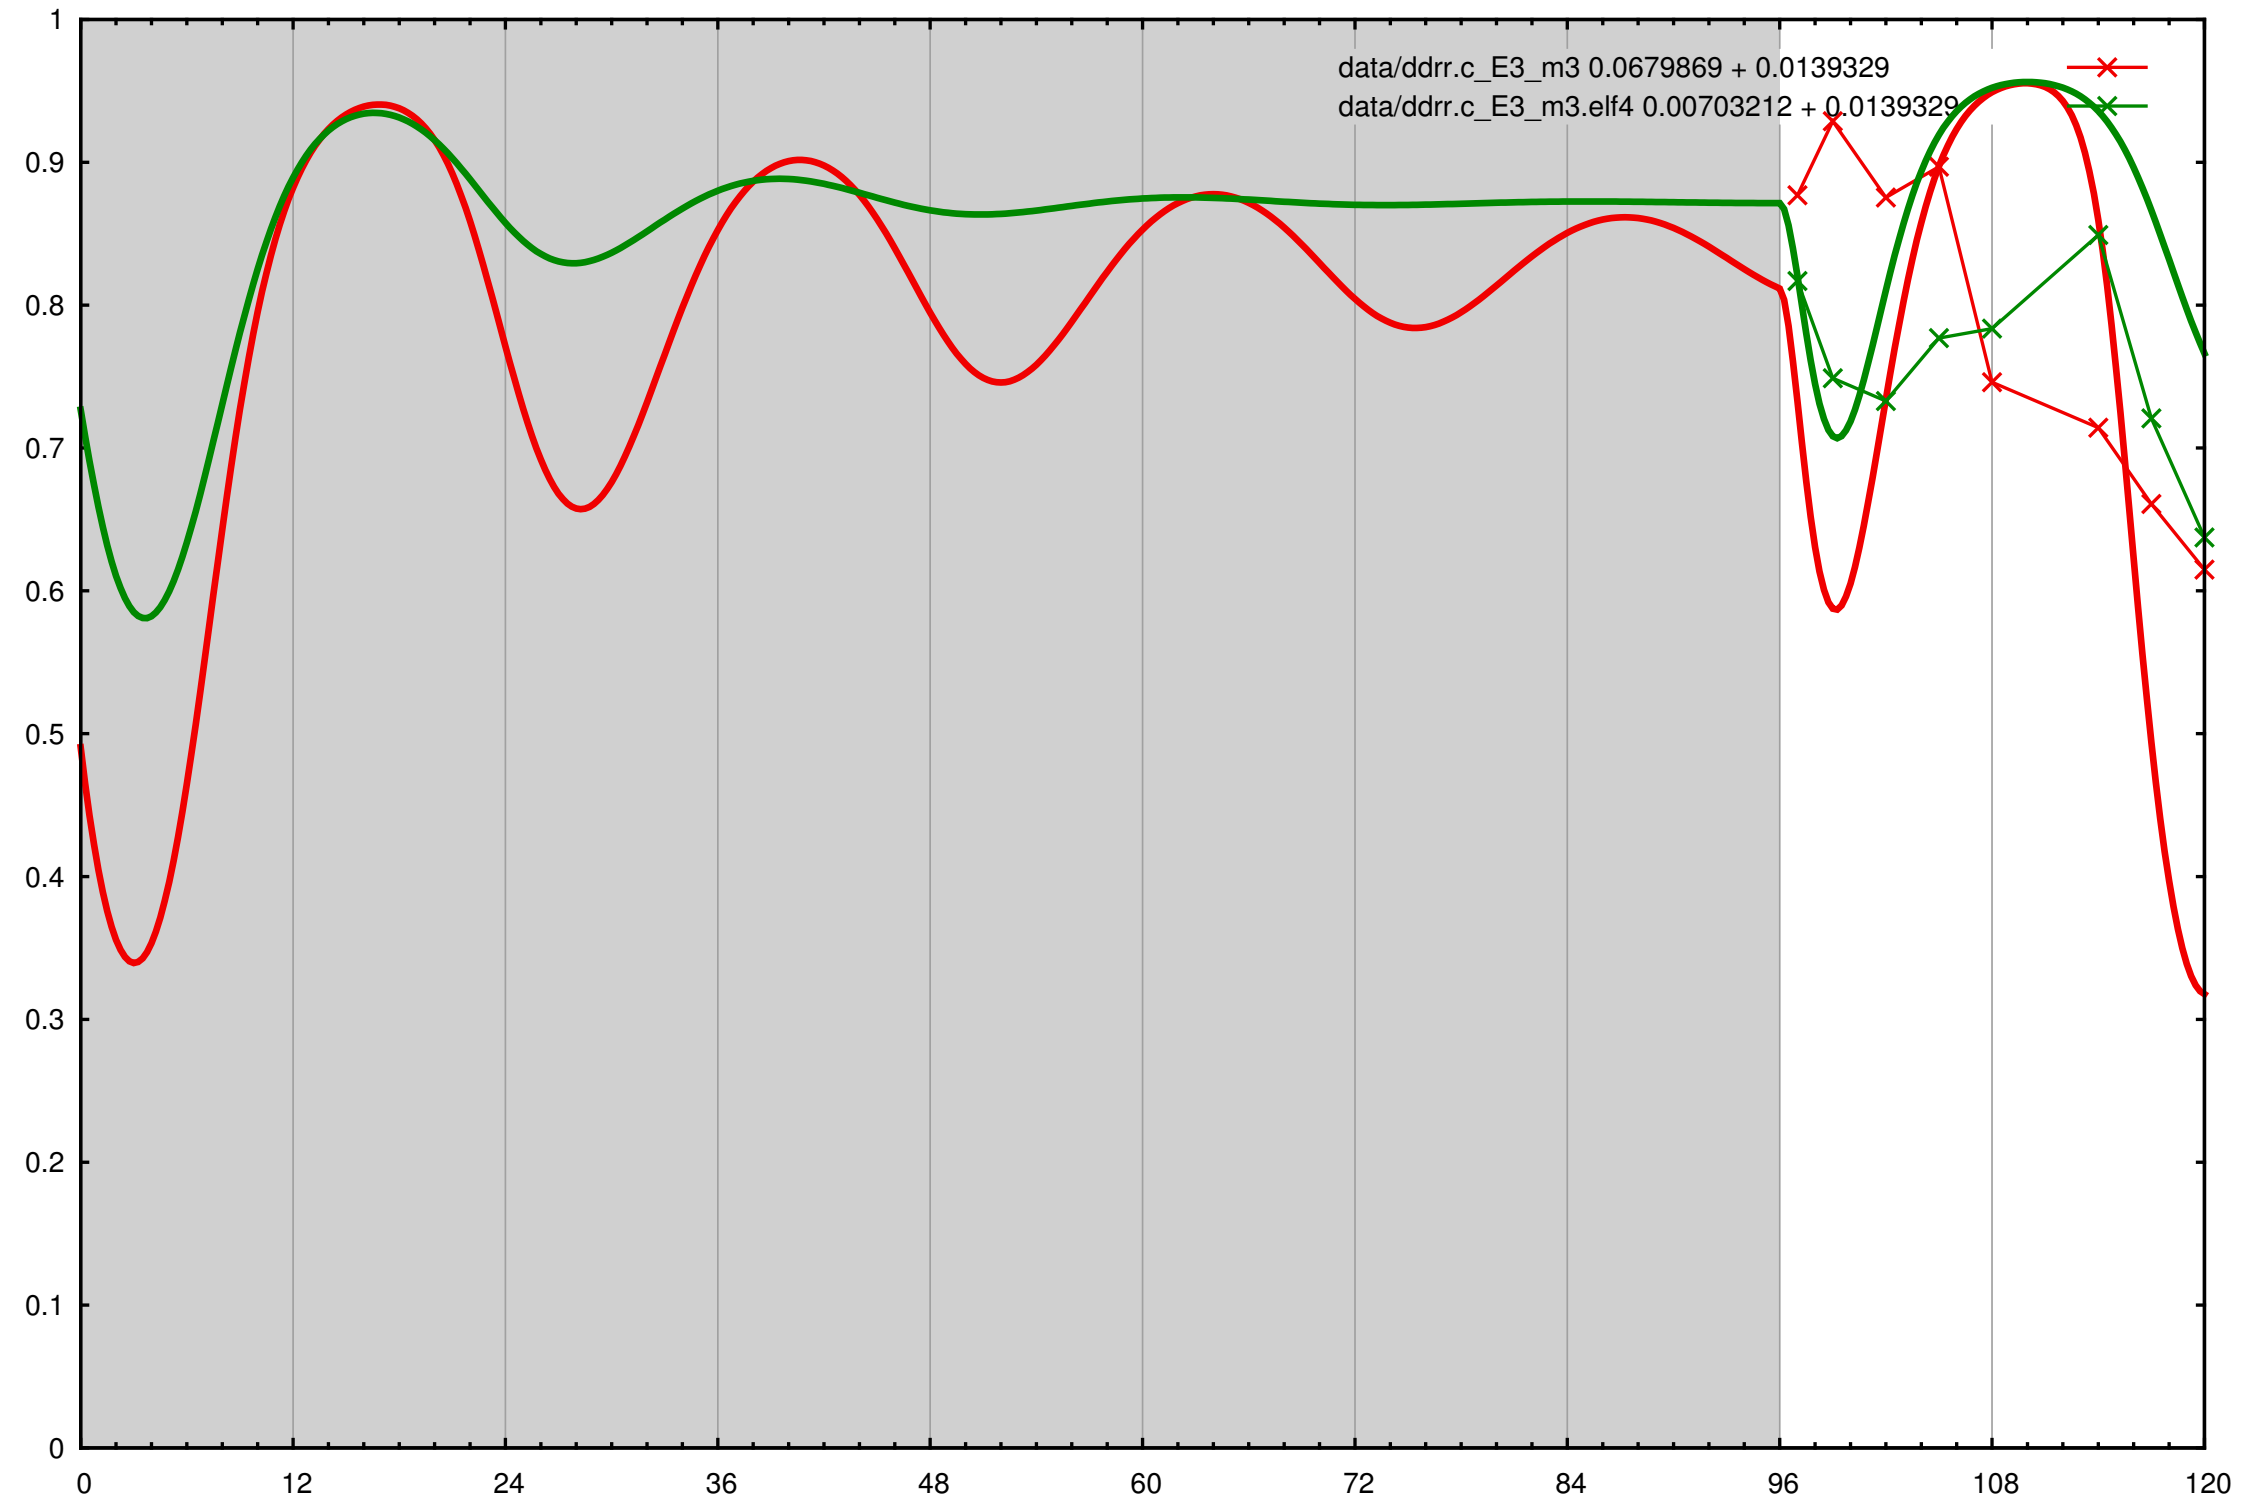

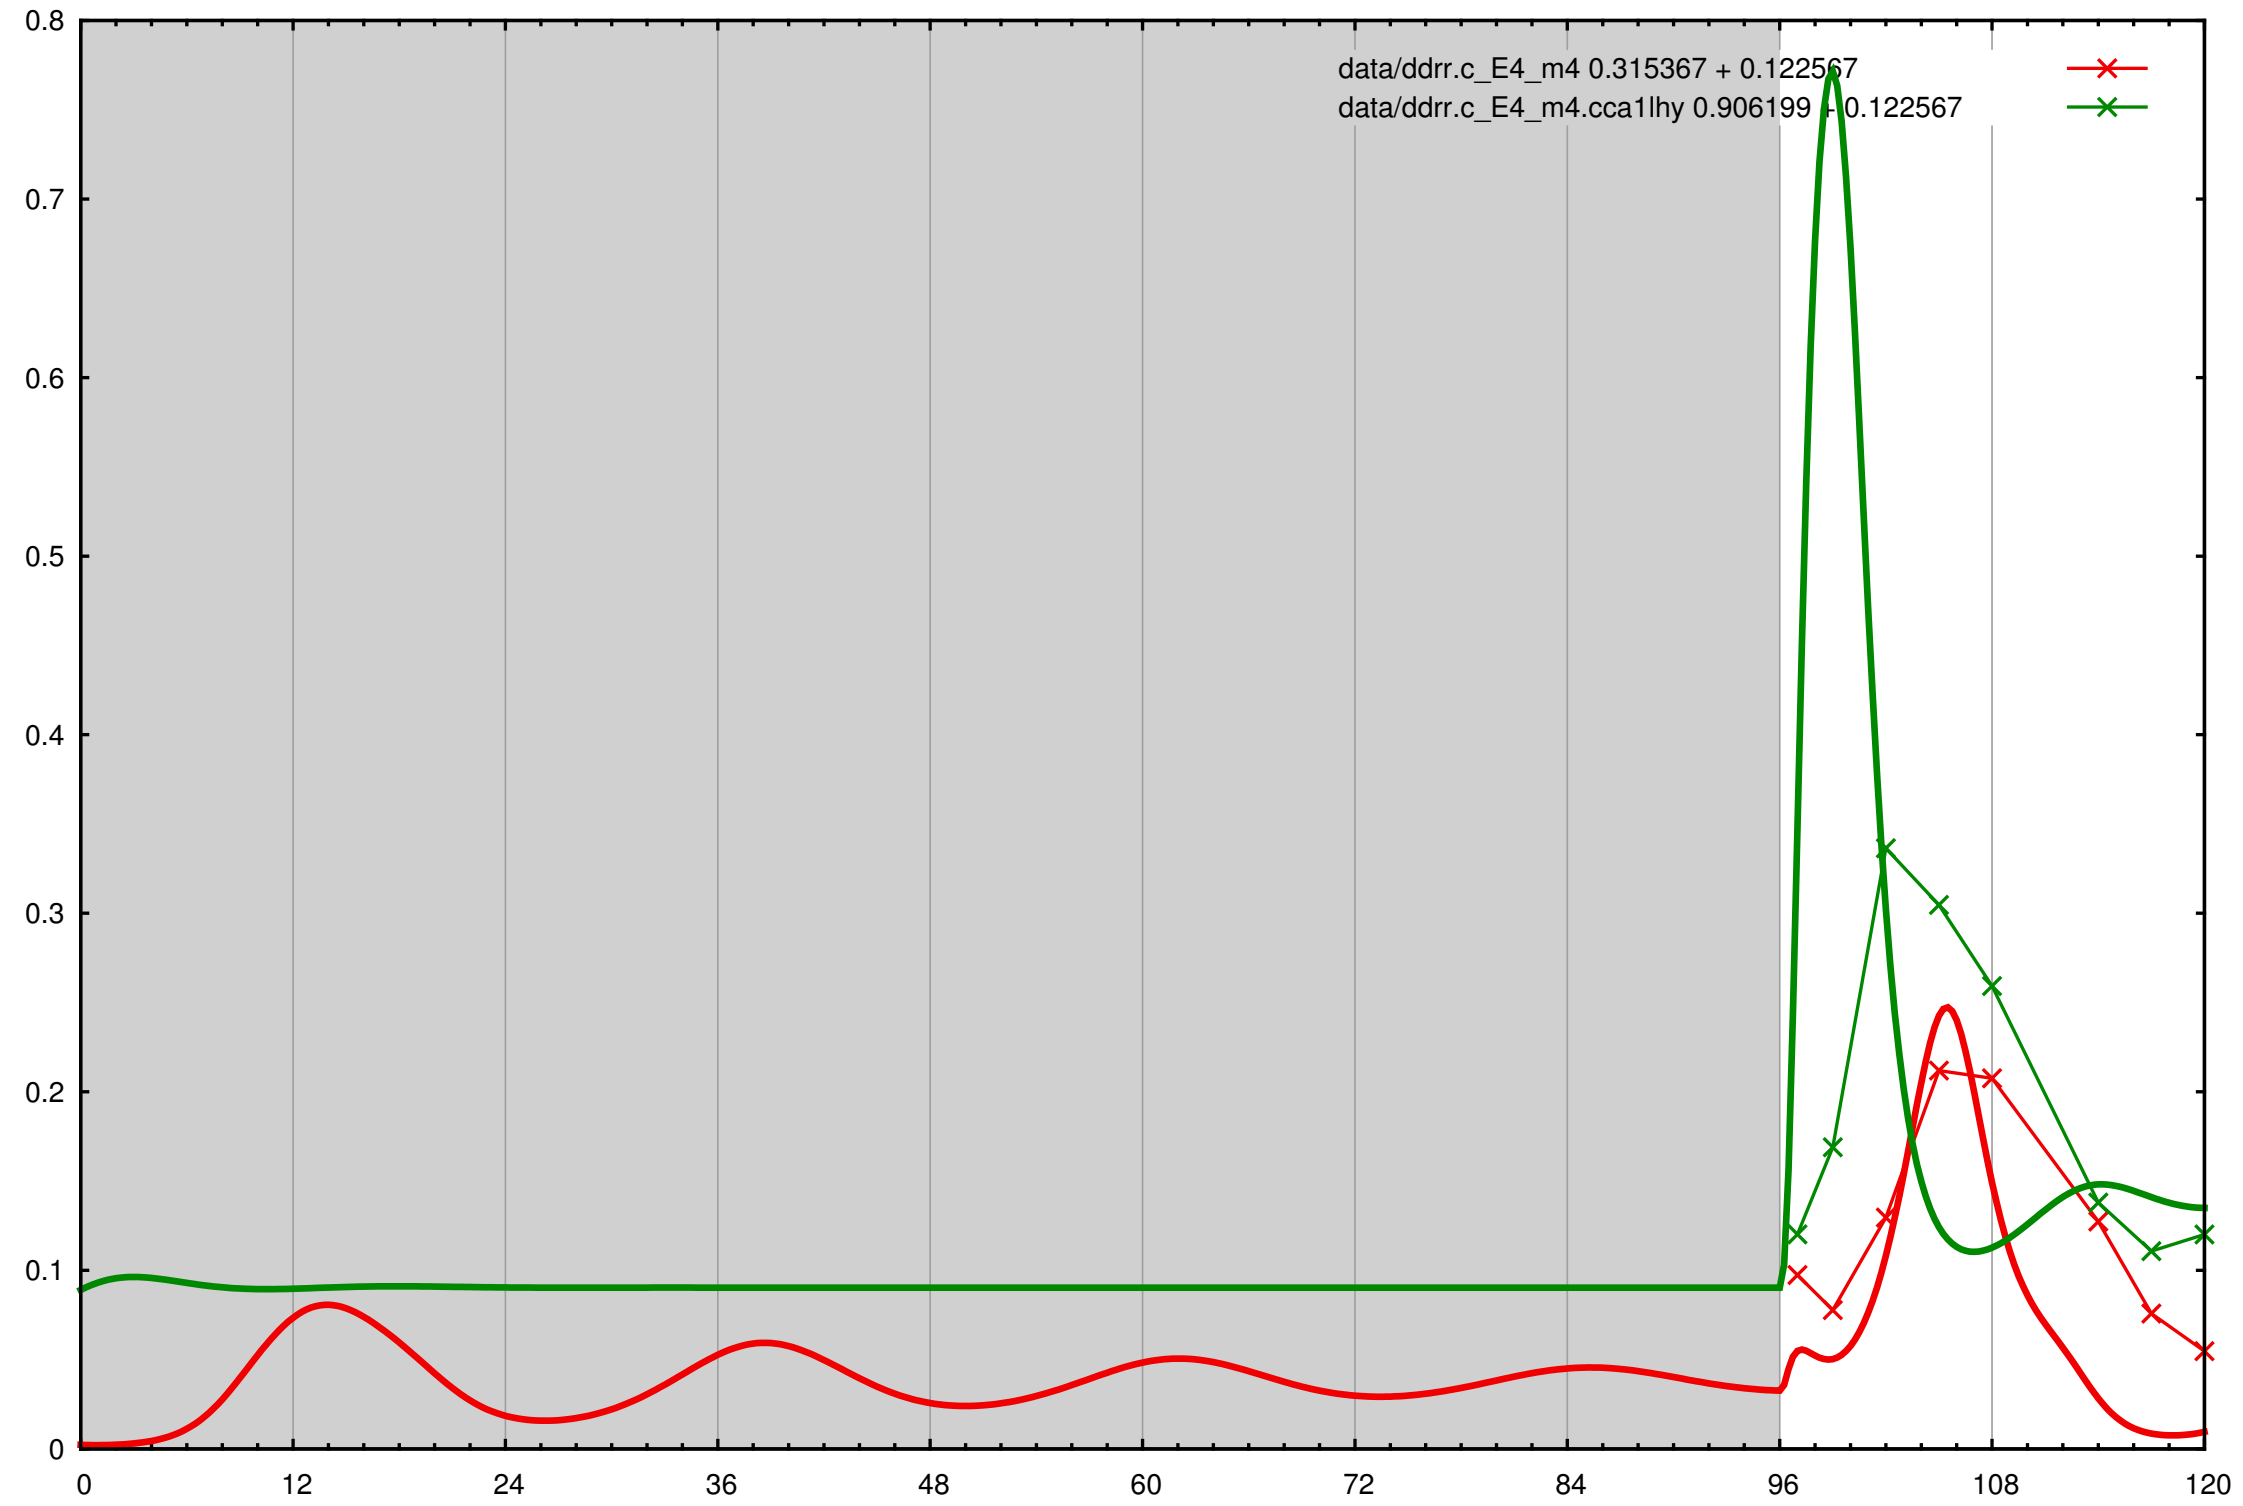

Scale group 184, scost 0.483485

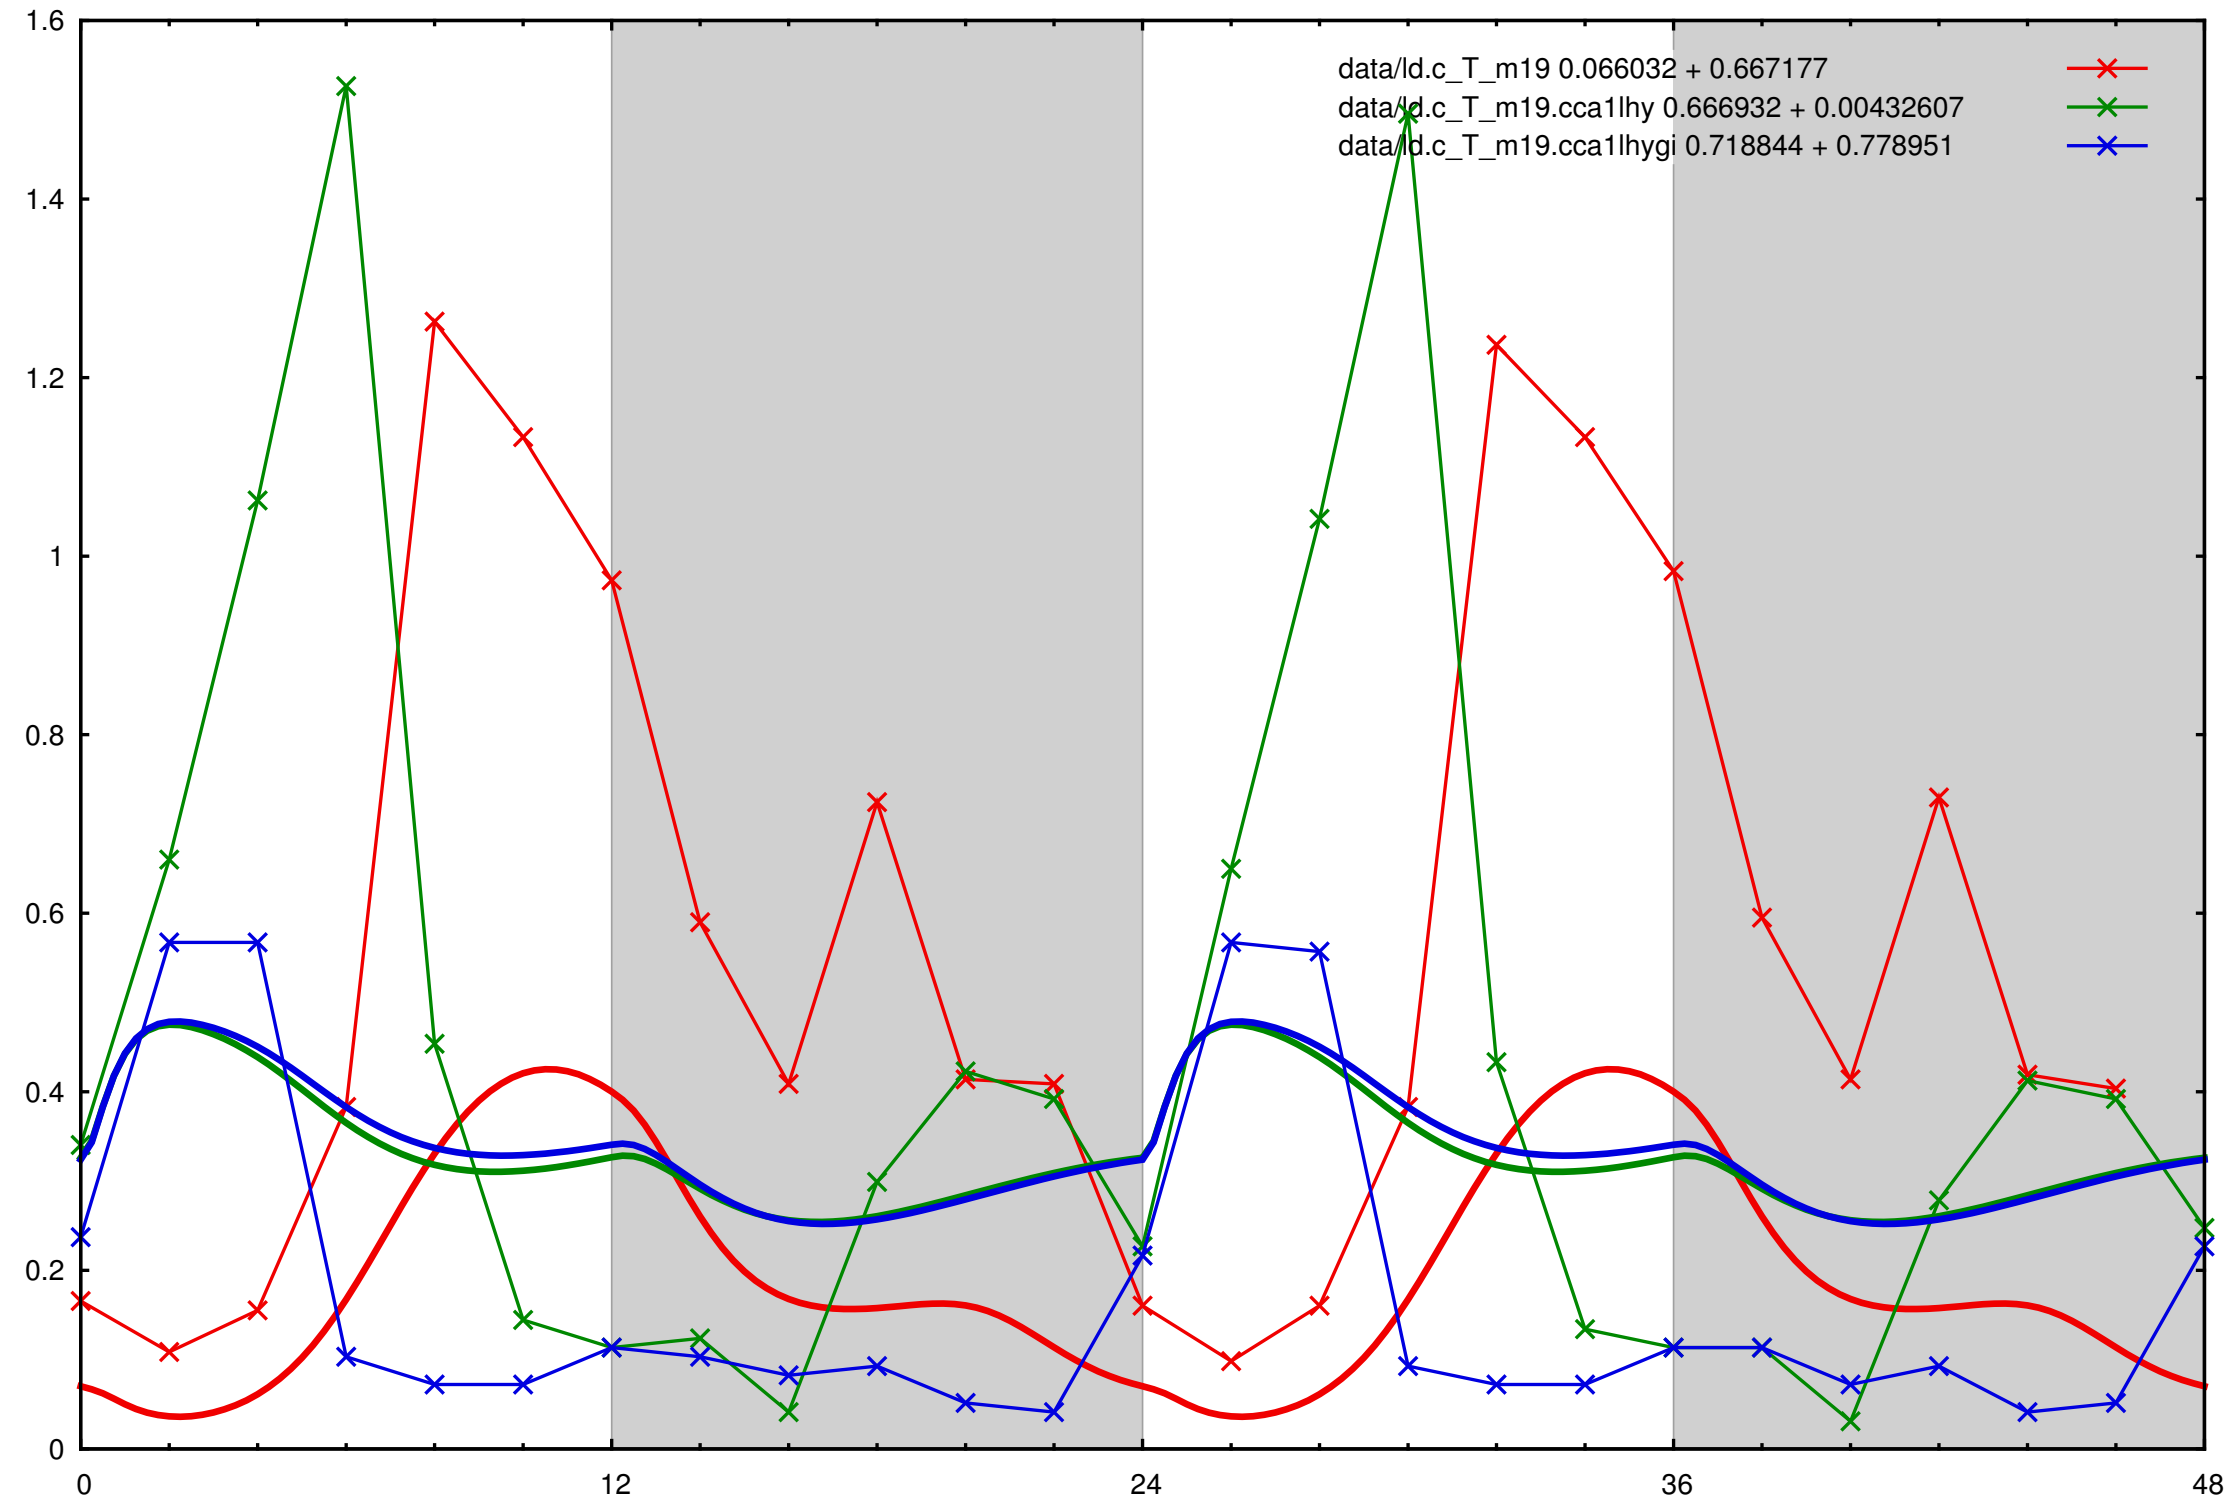



Scale group 185, scost 0.375006

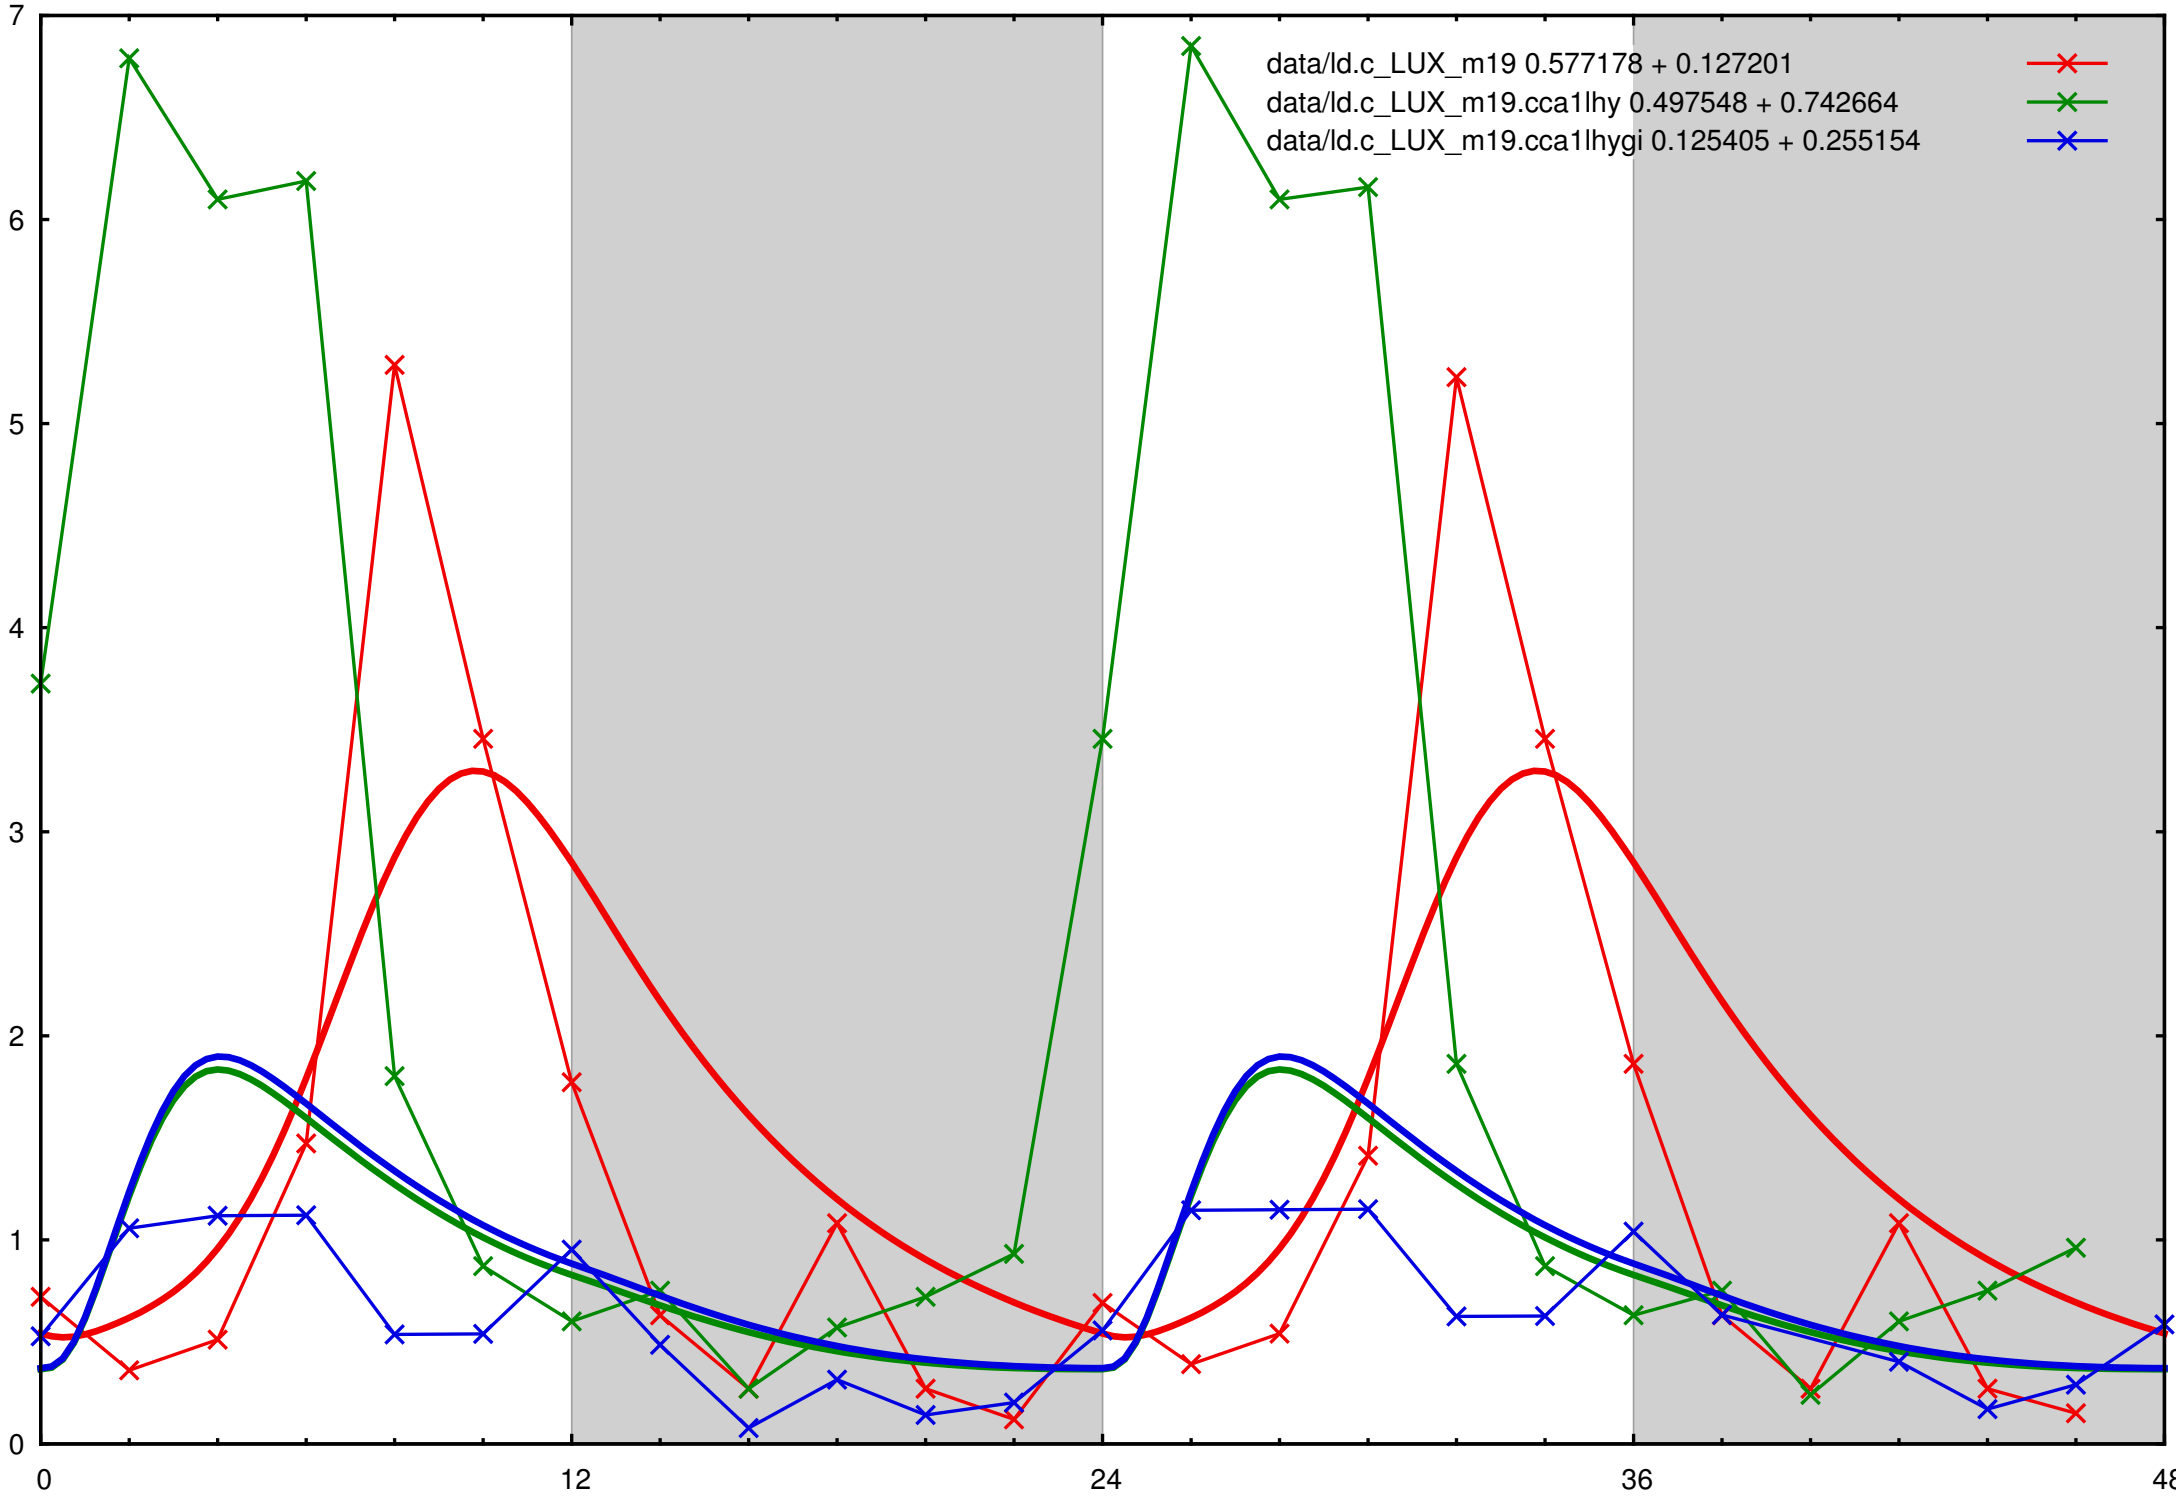

Scale group 186, scost 0.0750252

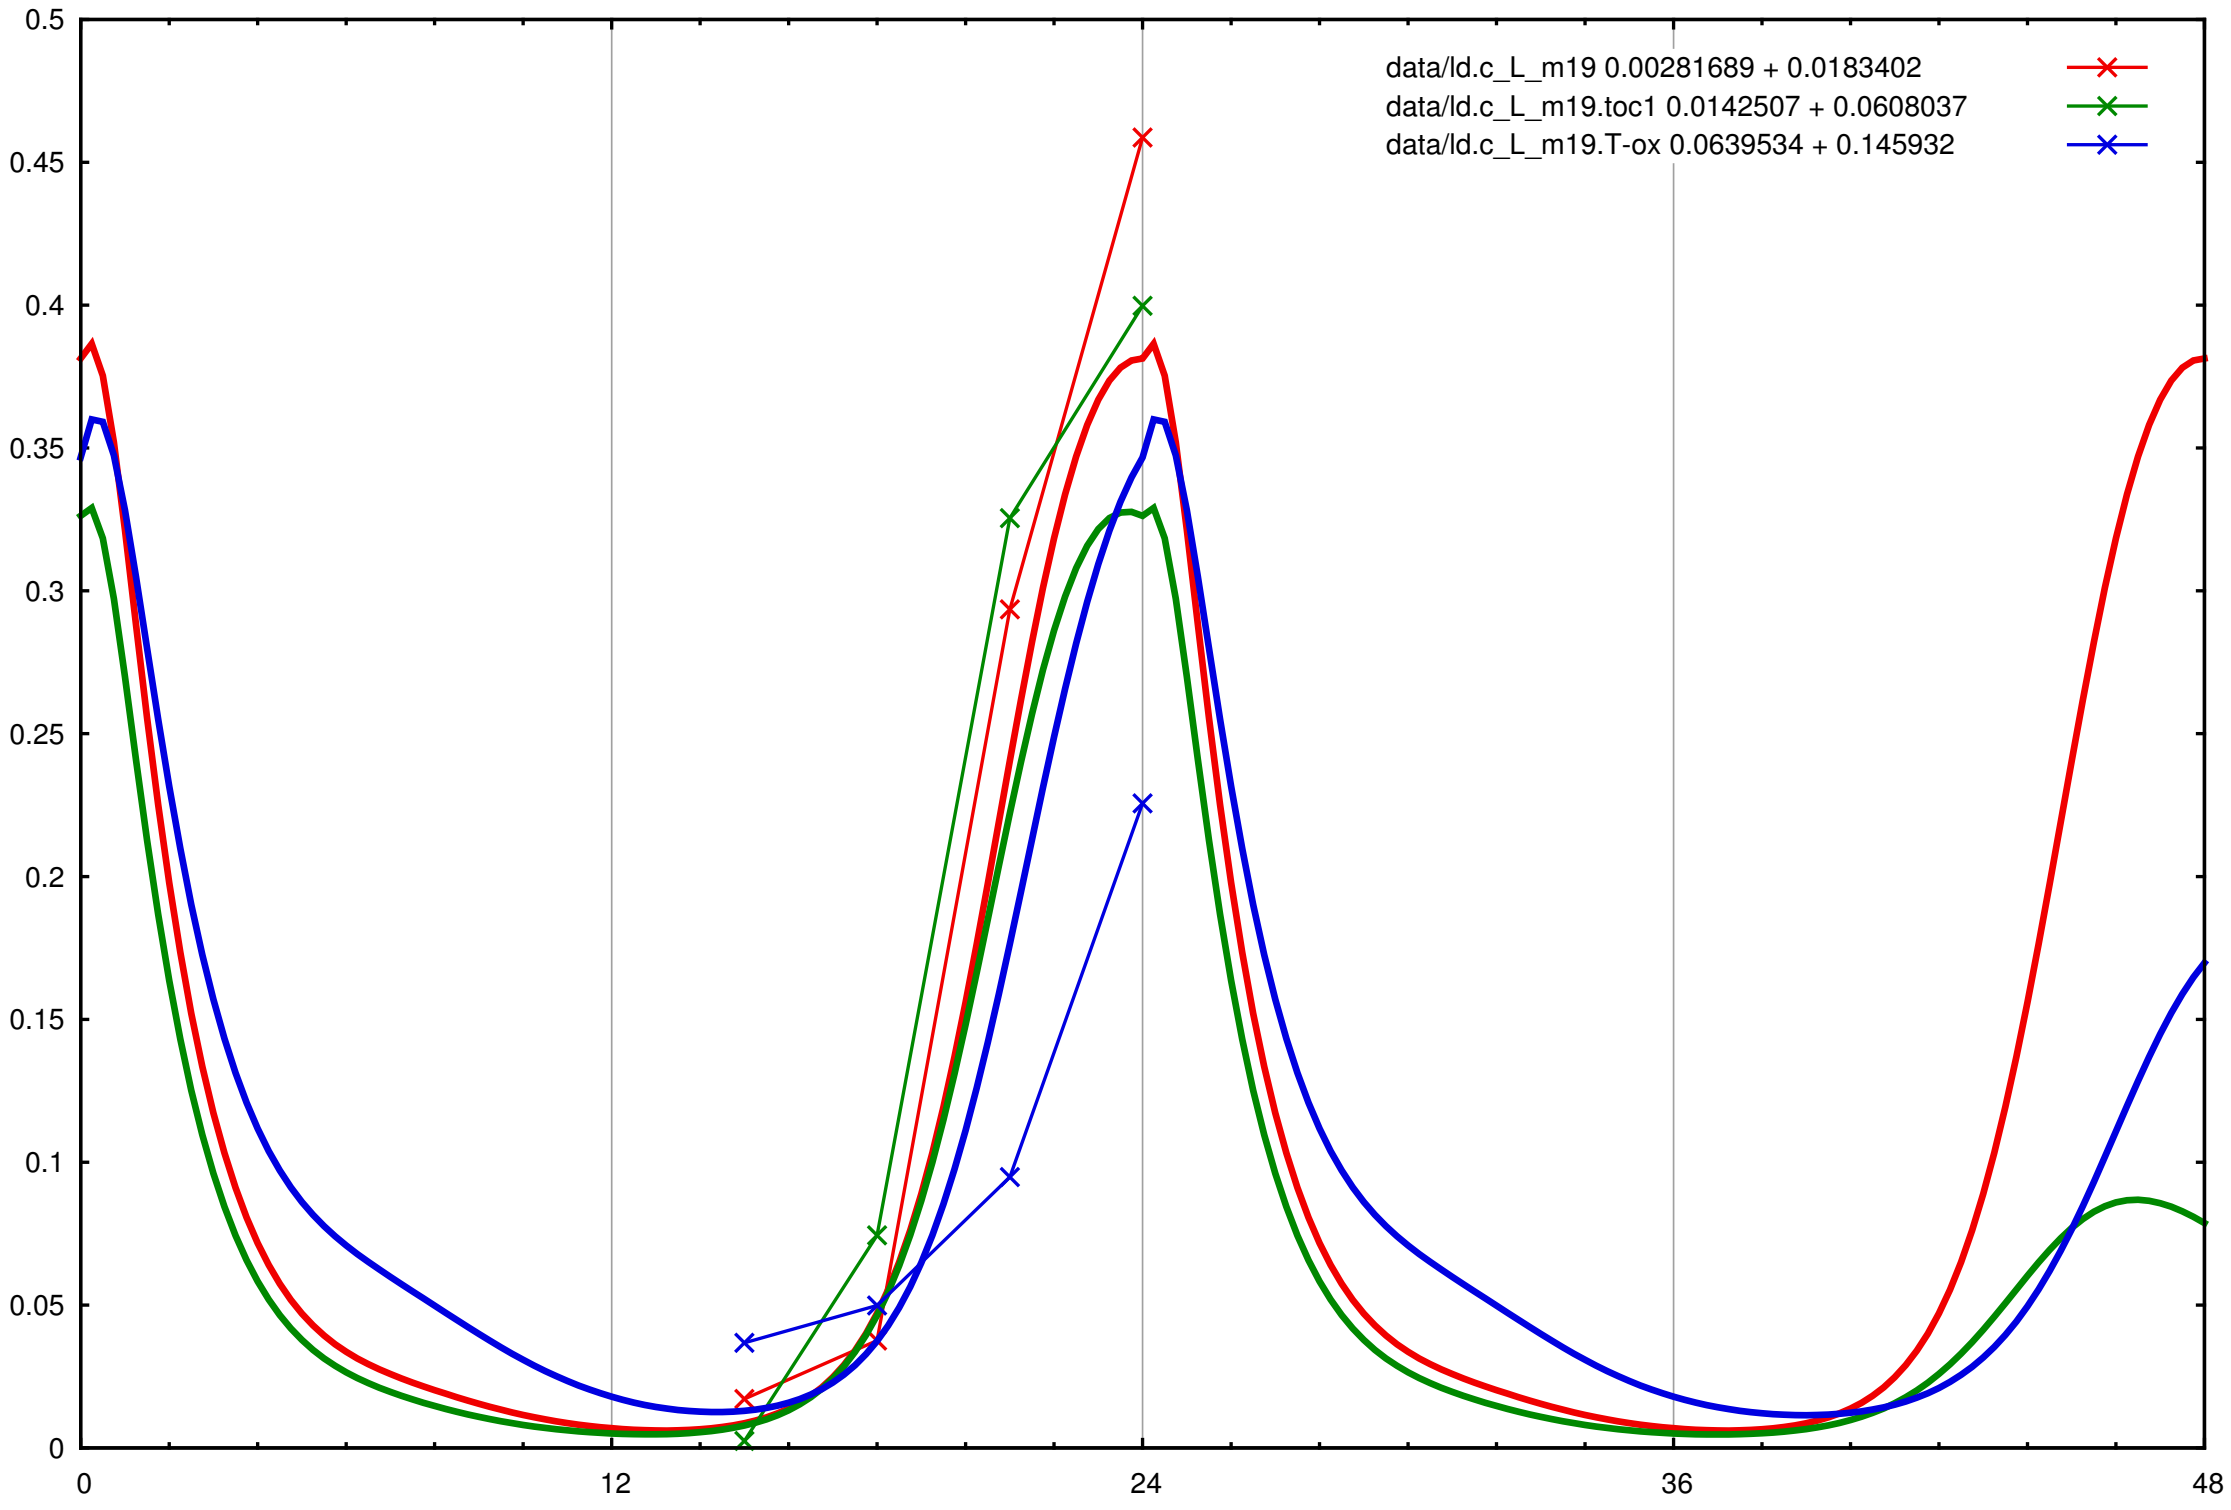

Scale group 187, scost 0.183415

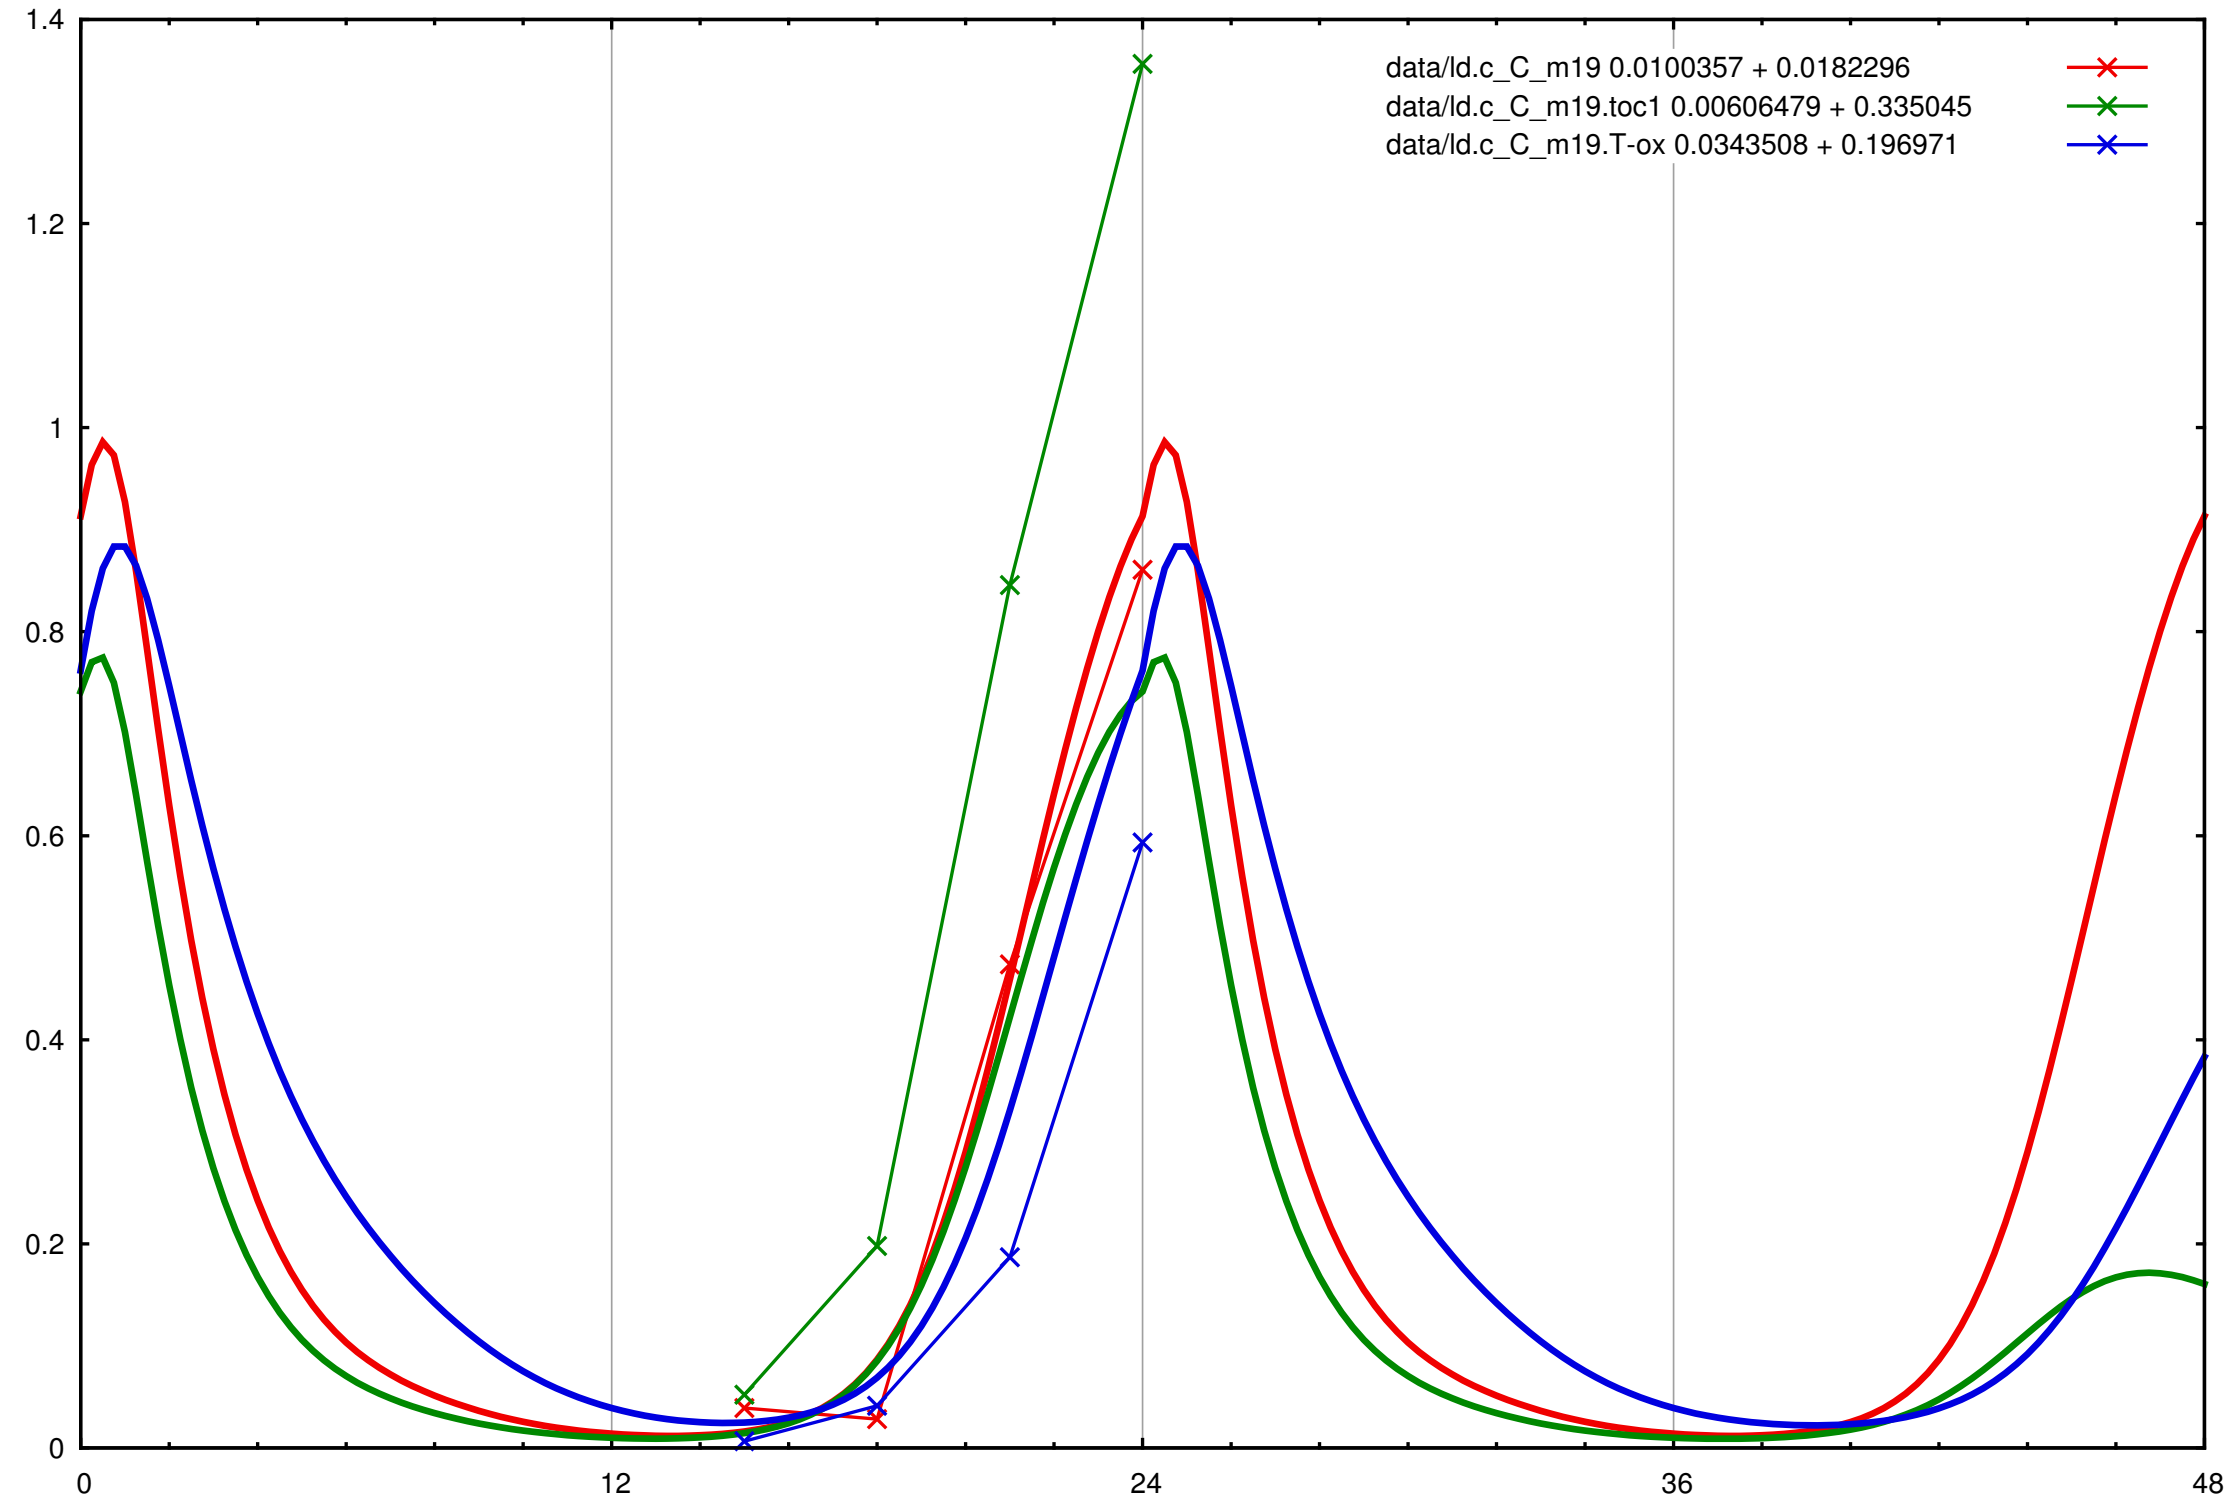

Scale group 188, scost 0.508801

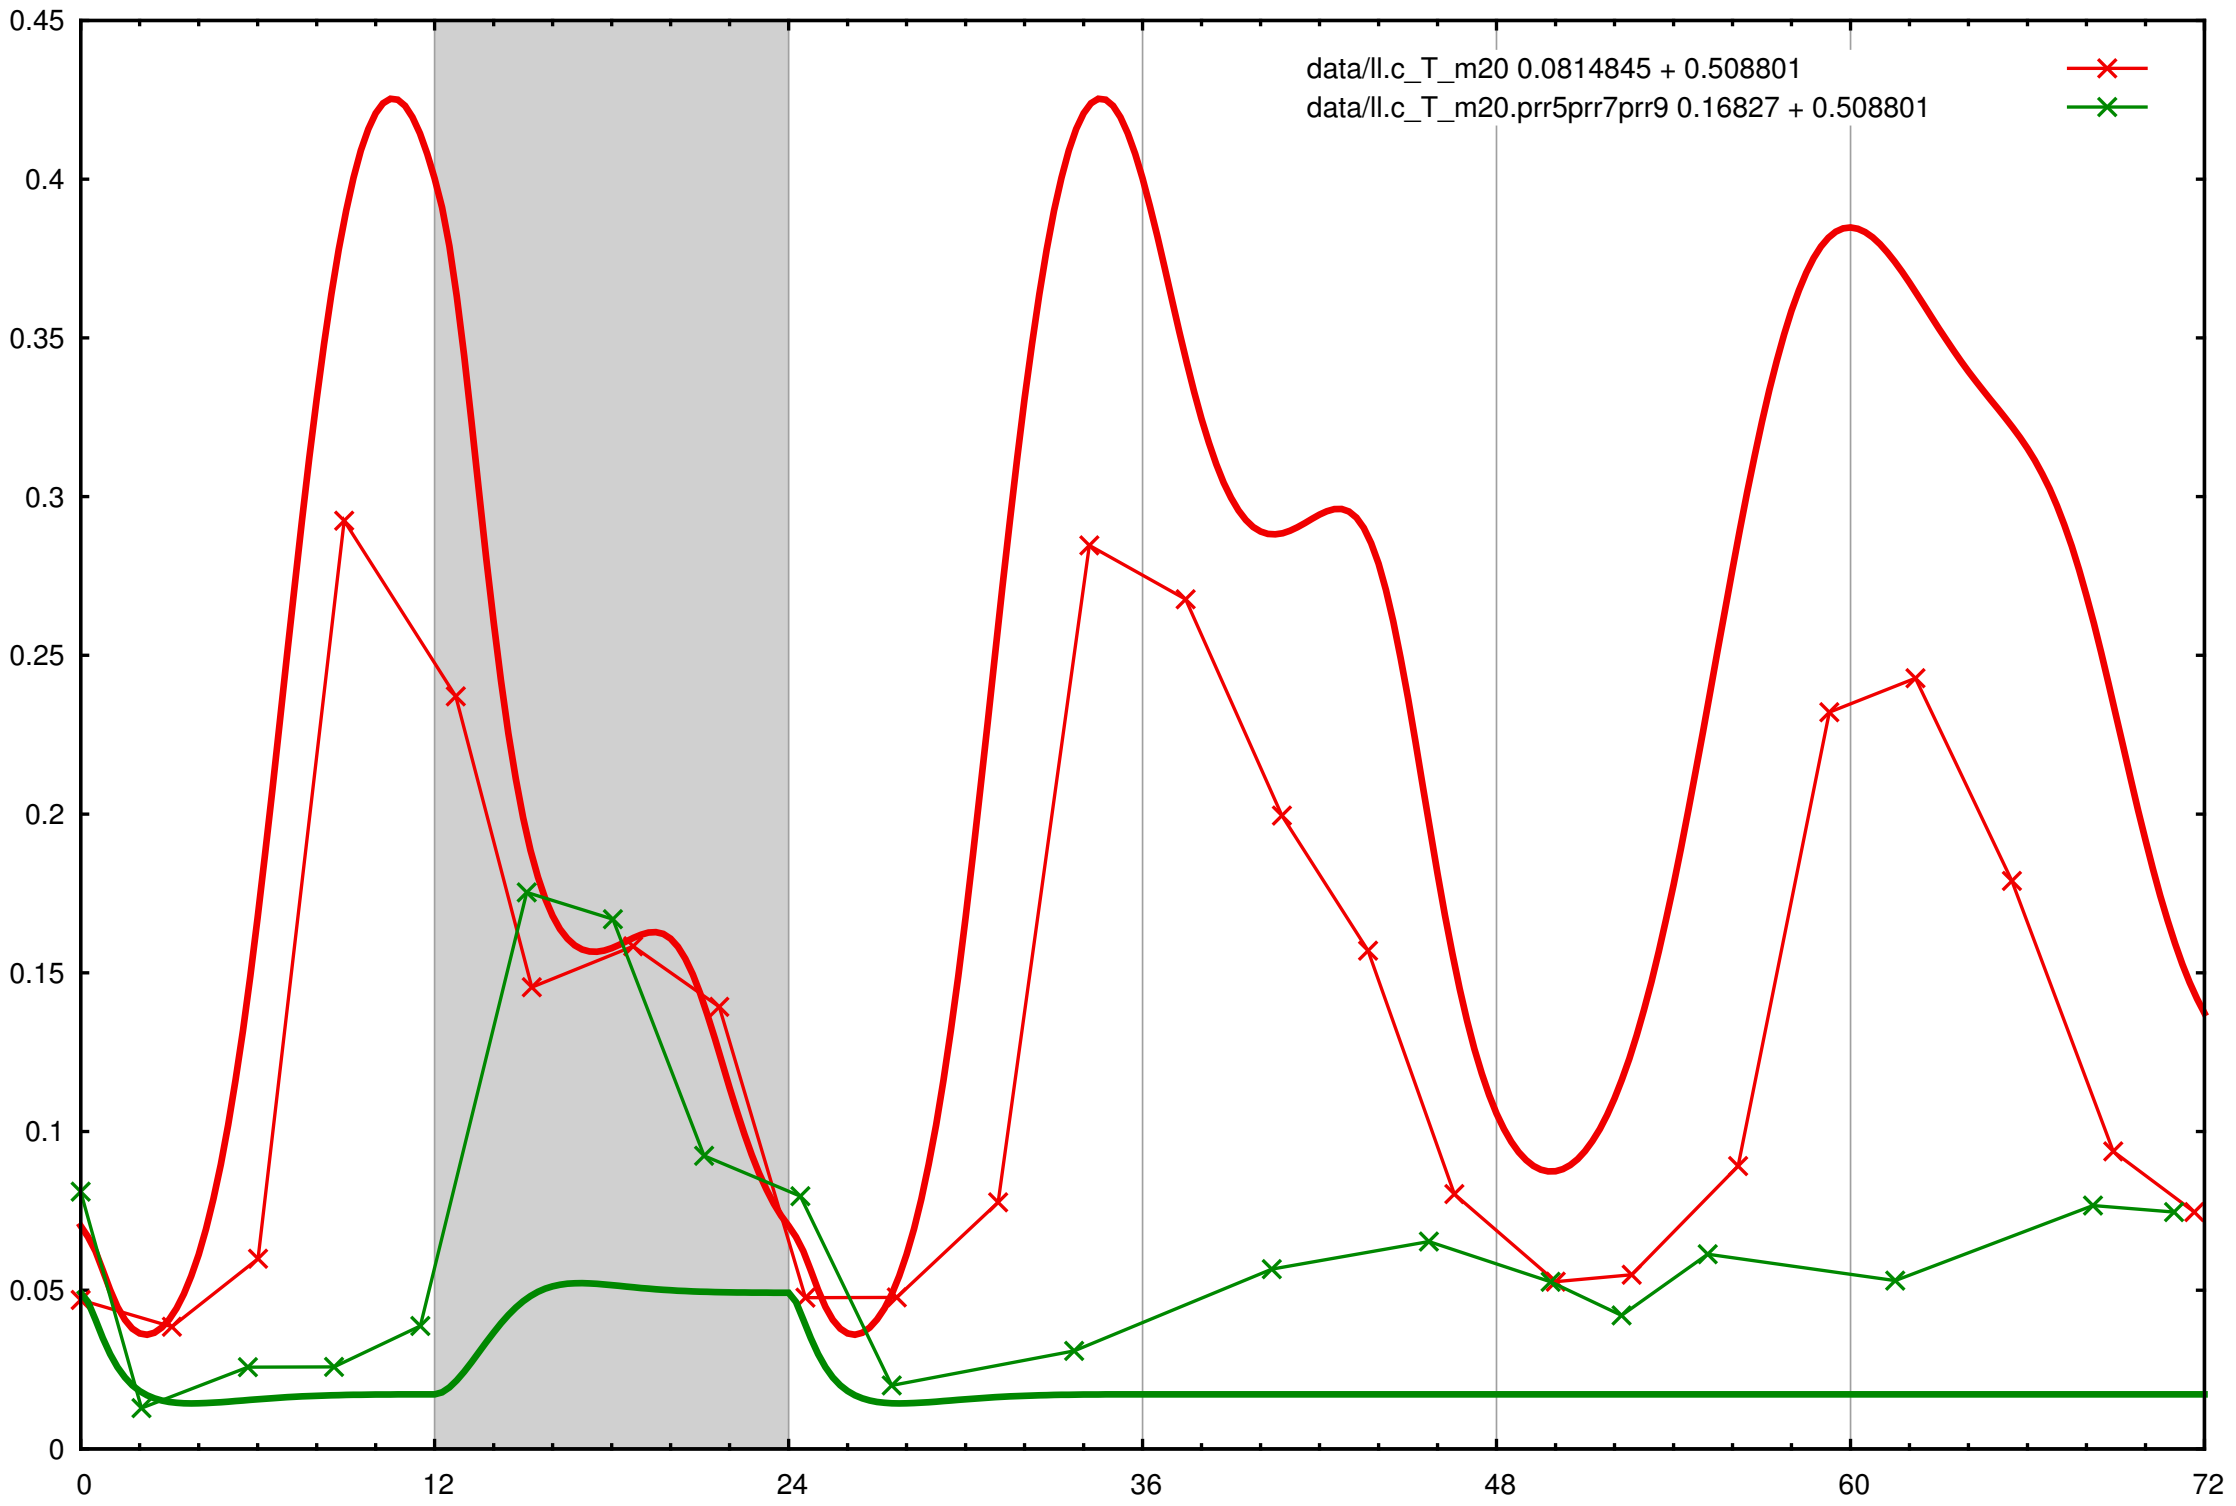

Scale group 189, scost 0.561743

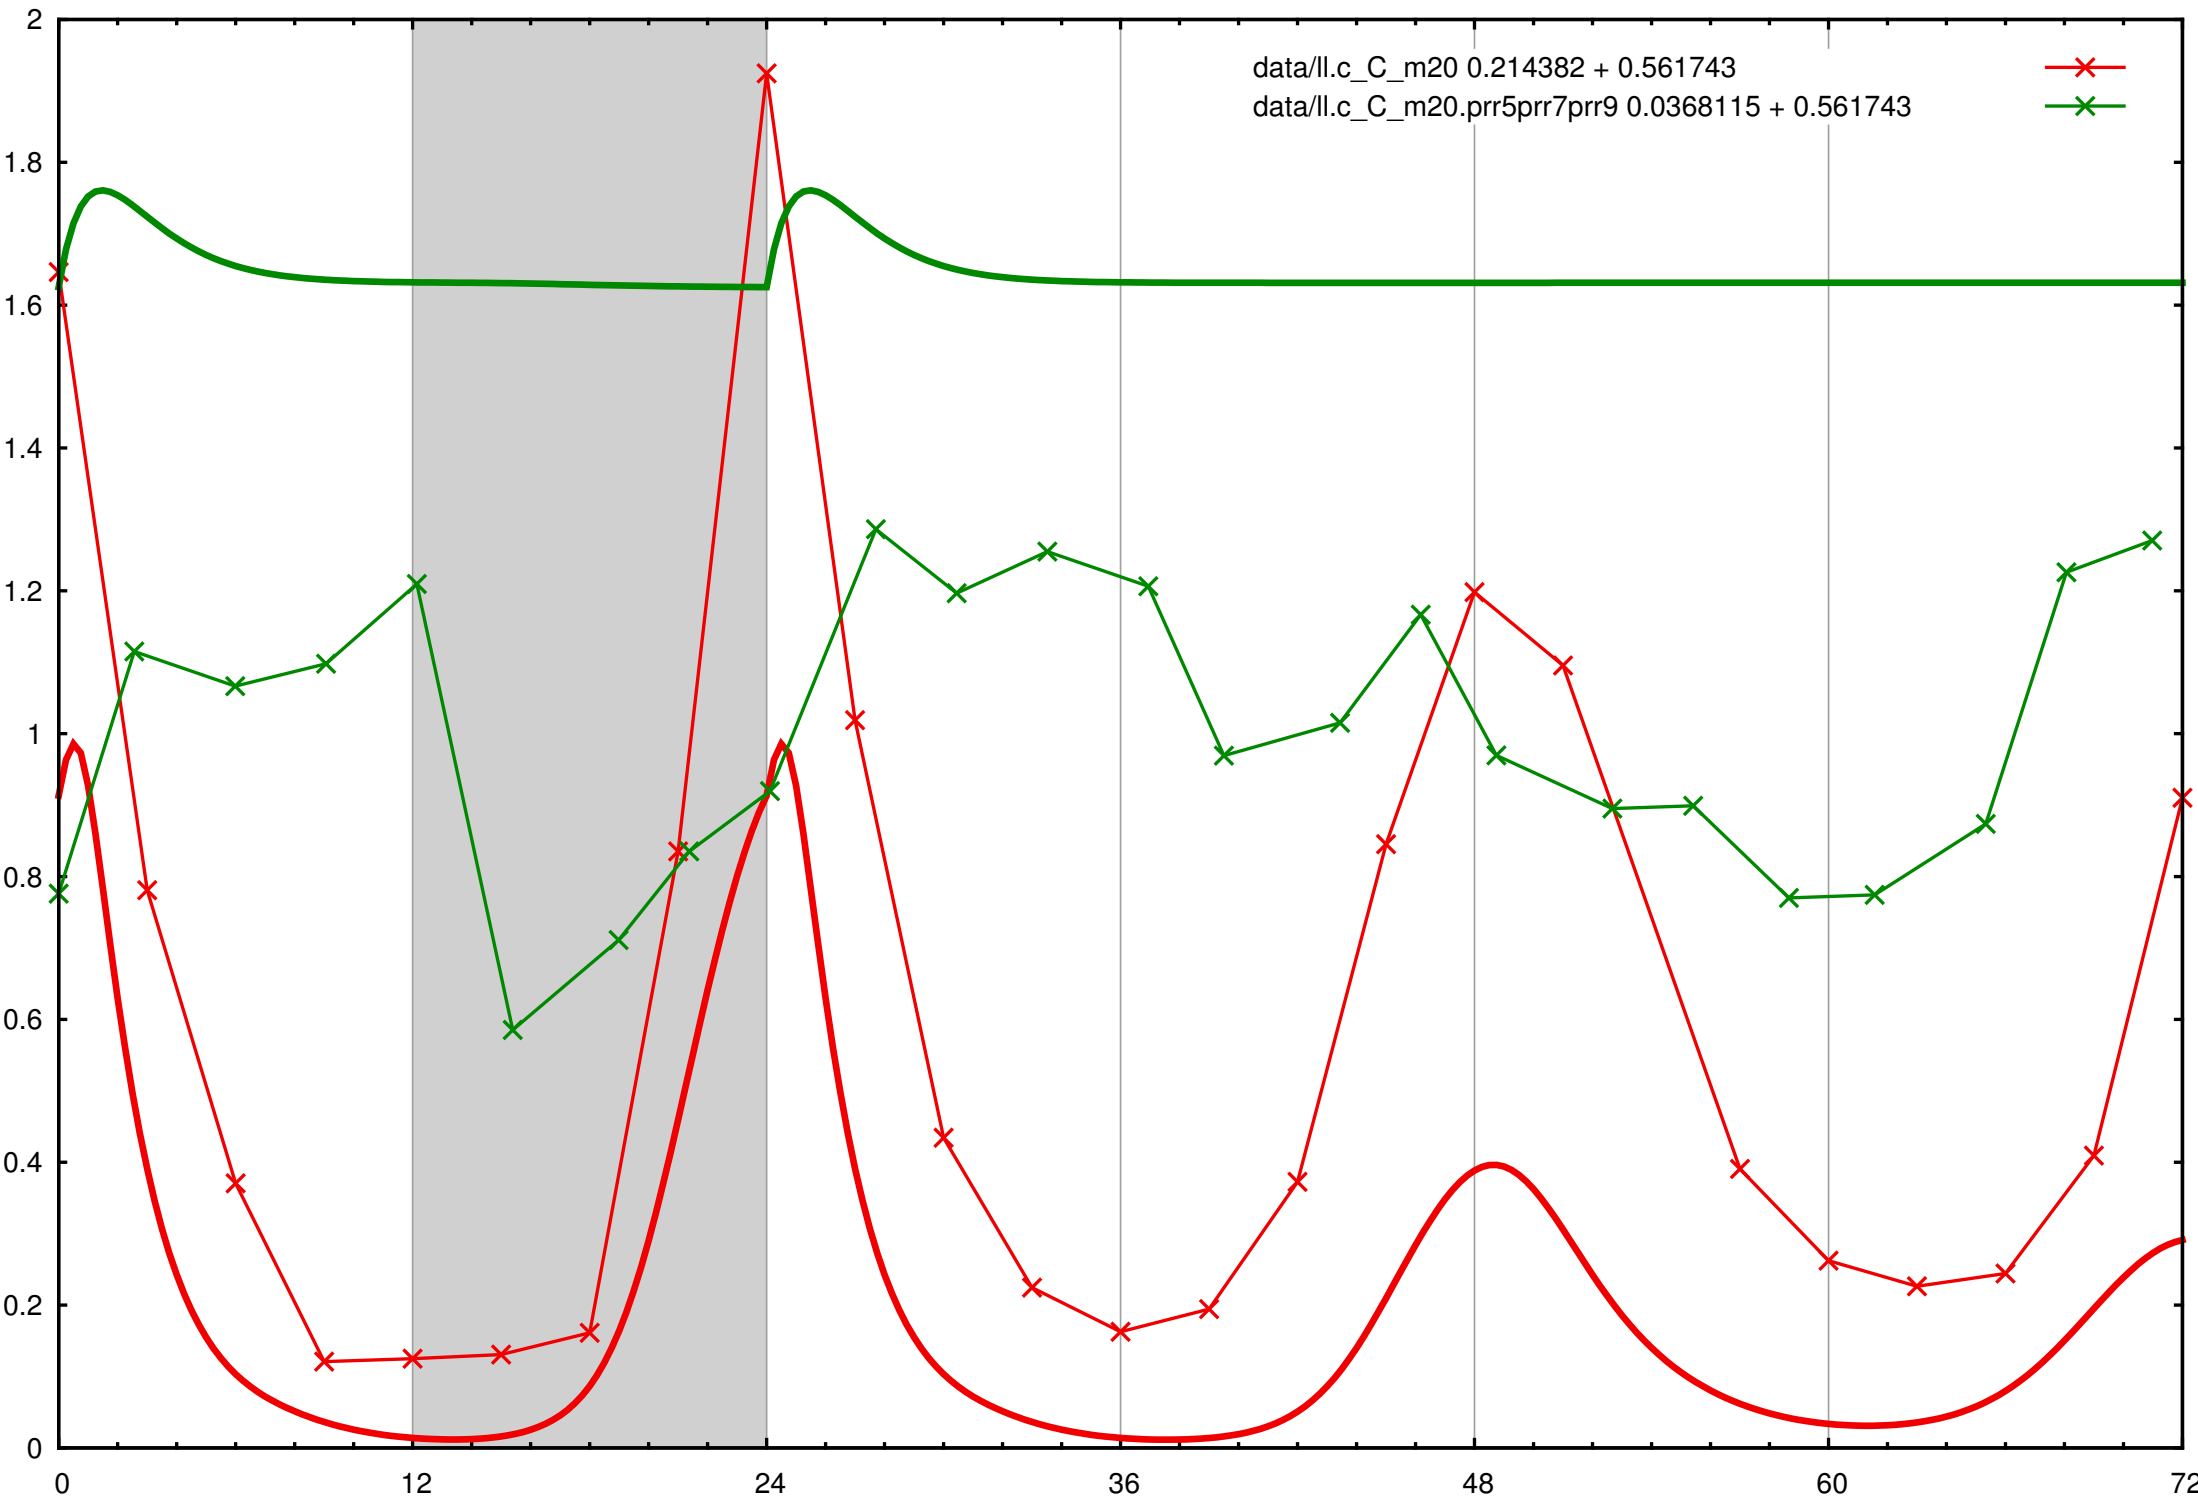

Scale group 190, scost 0.7104

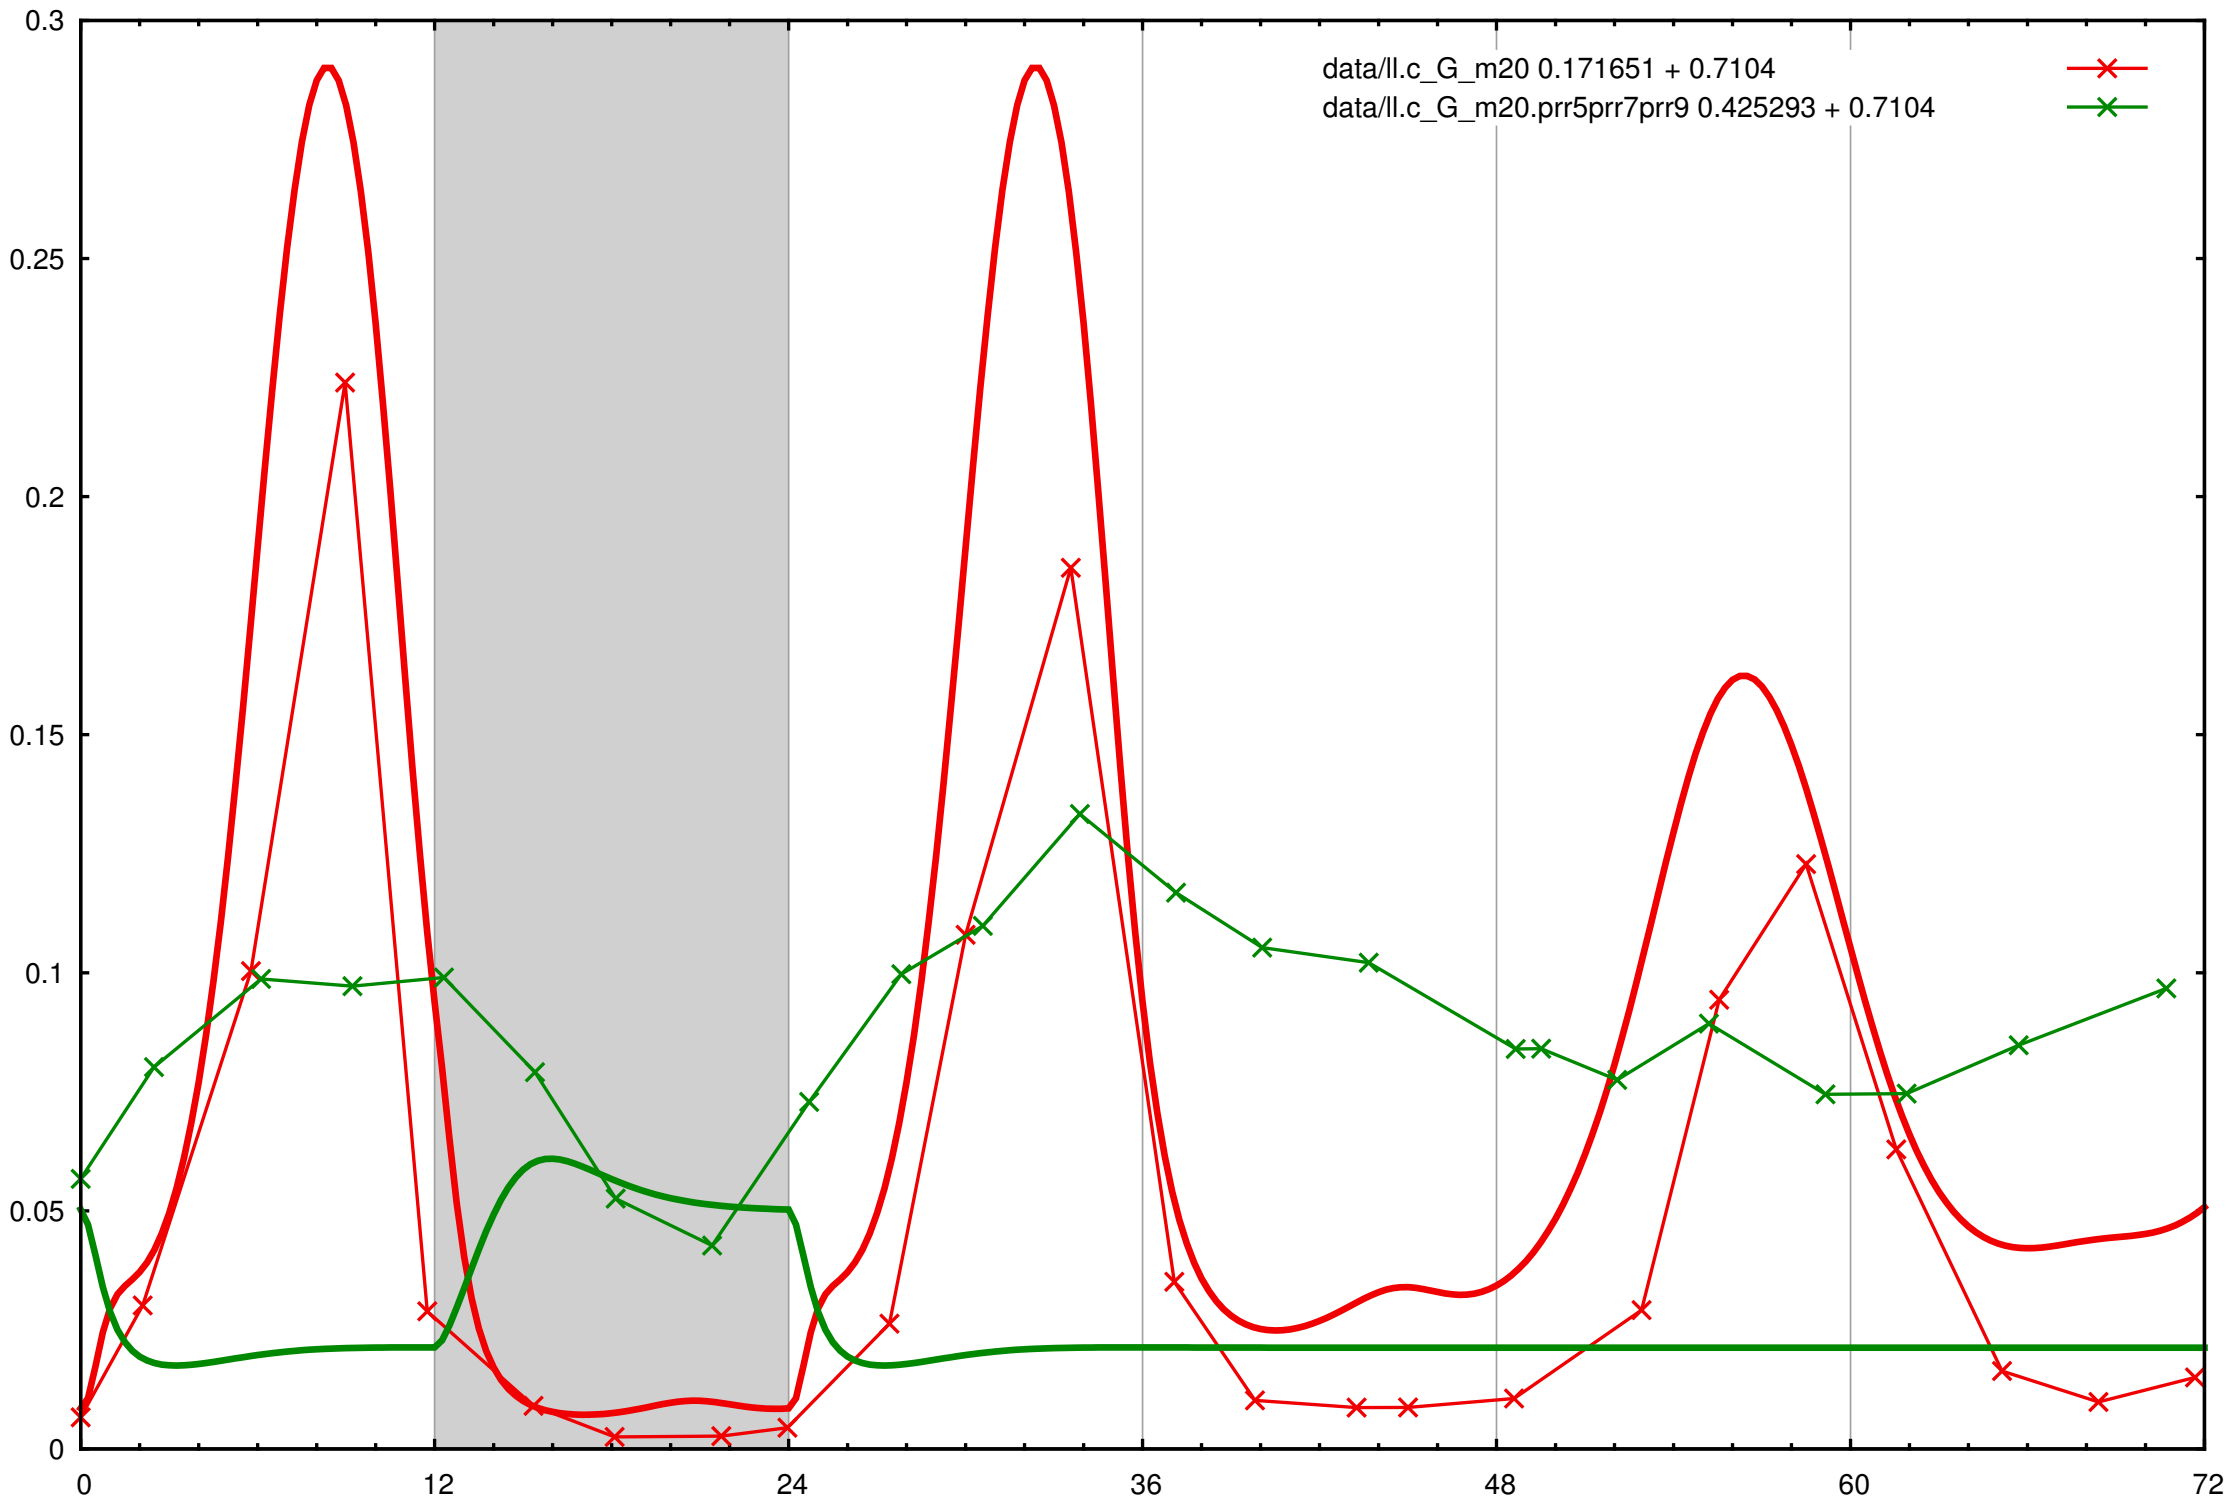

Scale group 191, scost 0.105025

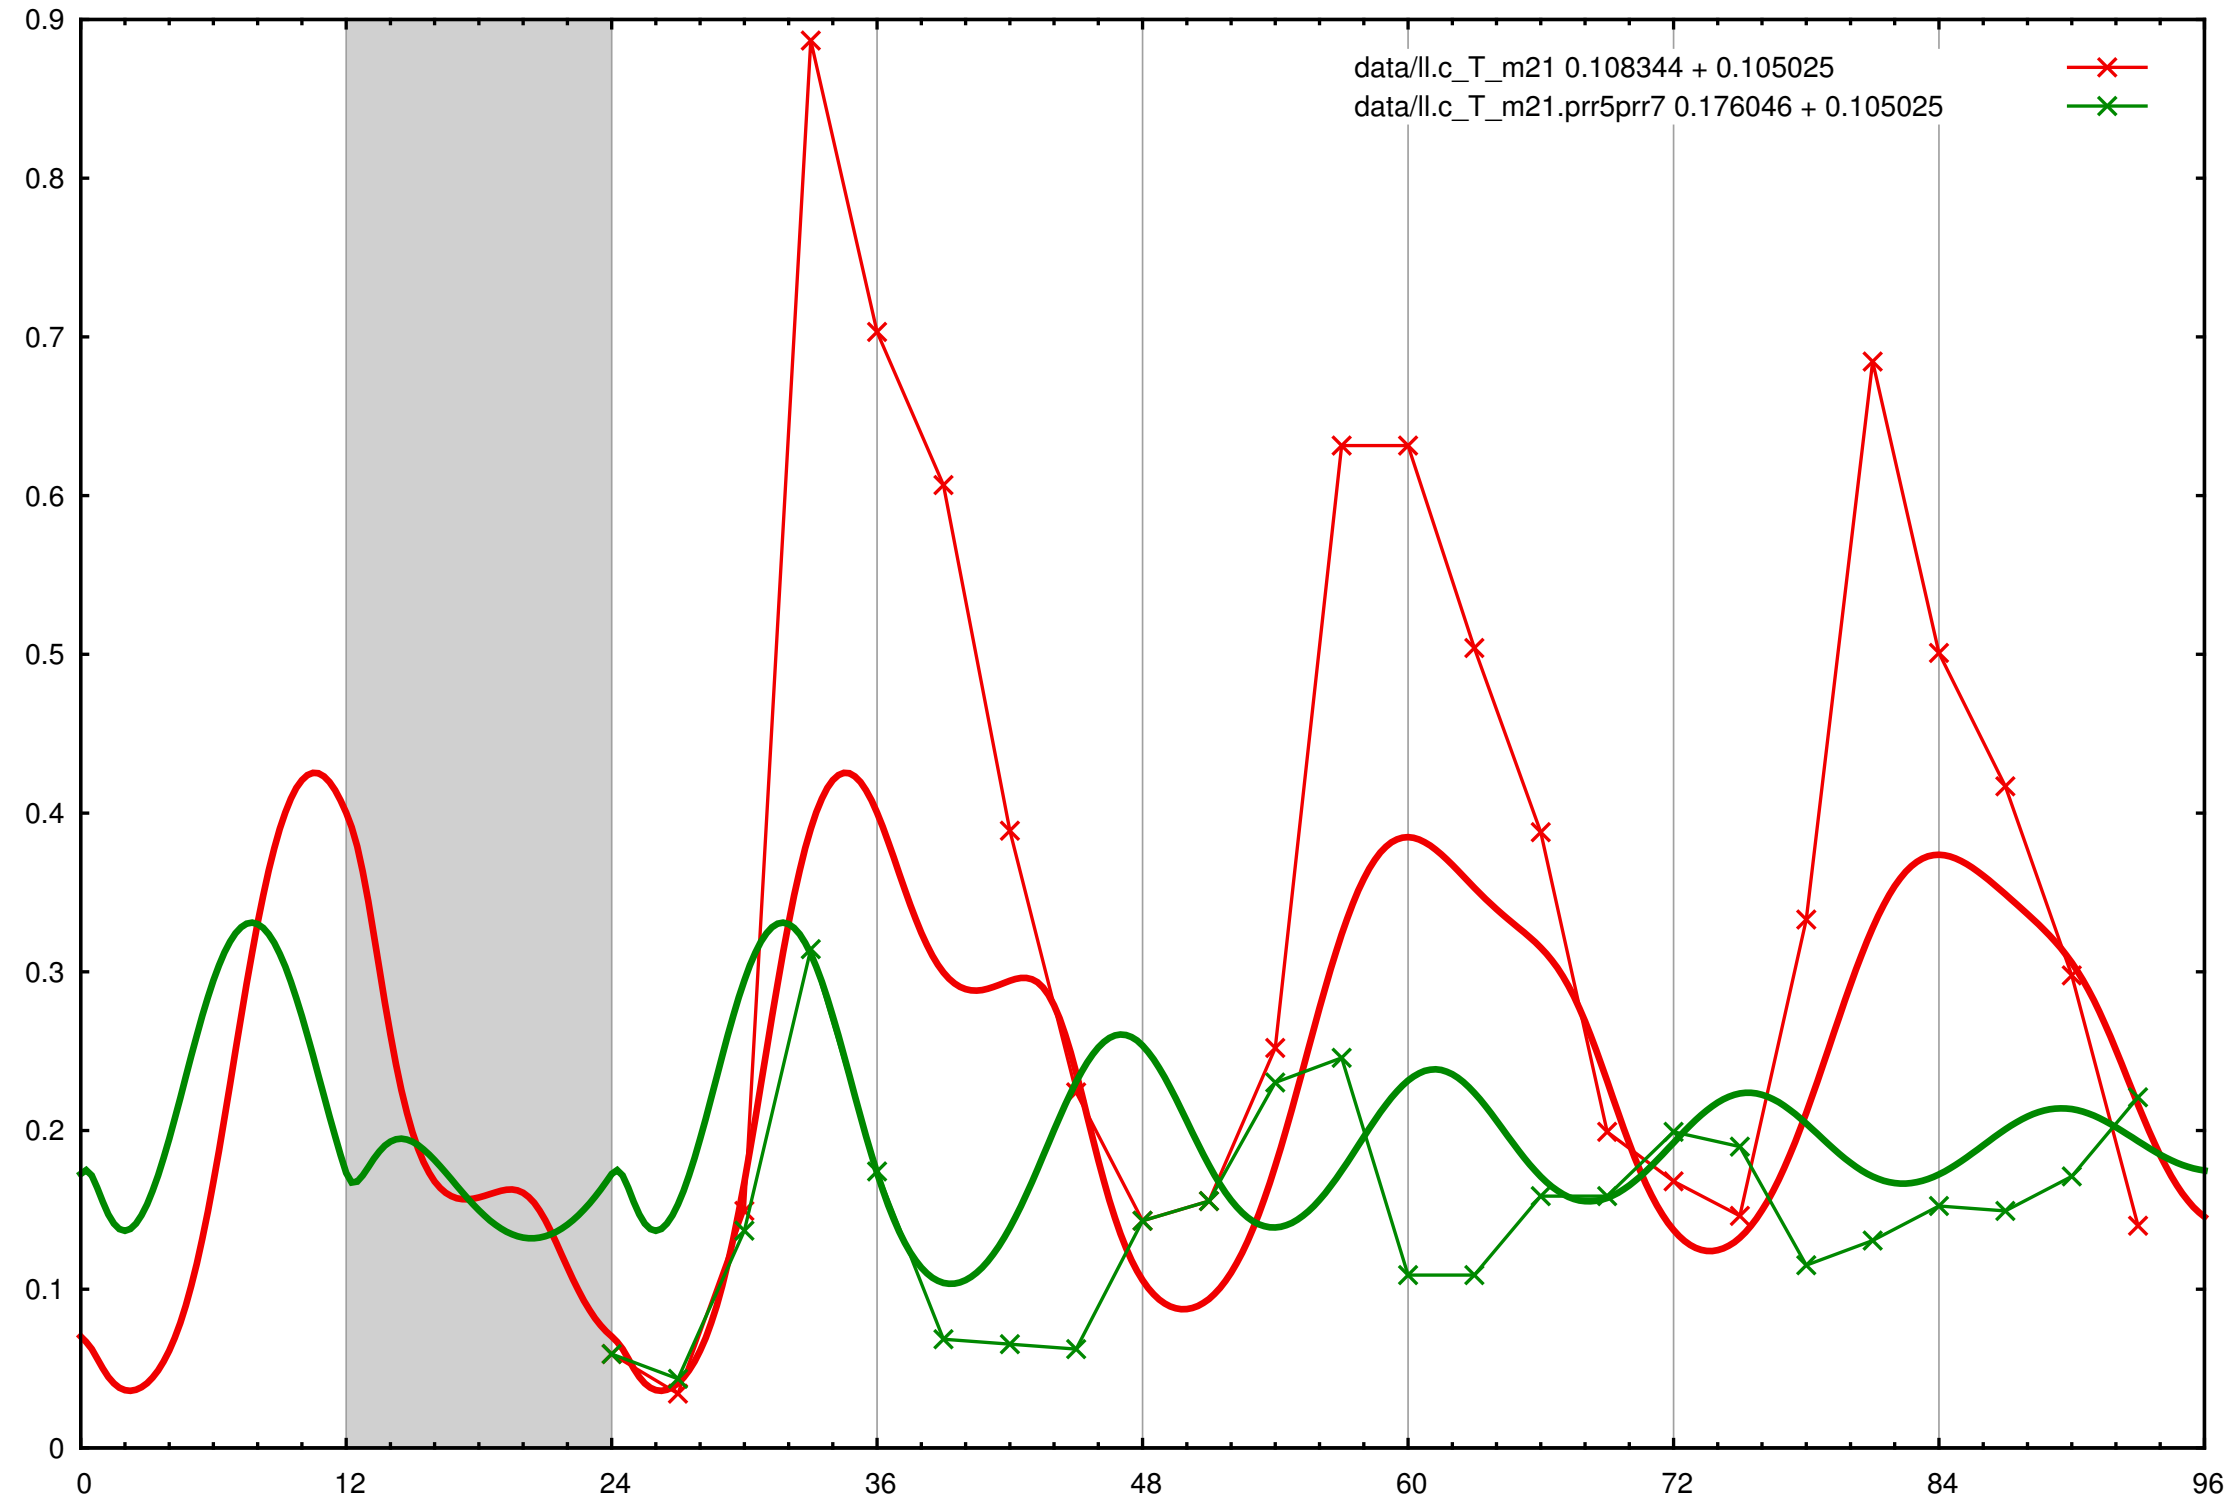

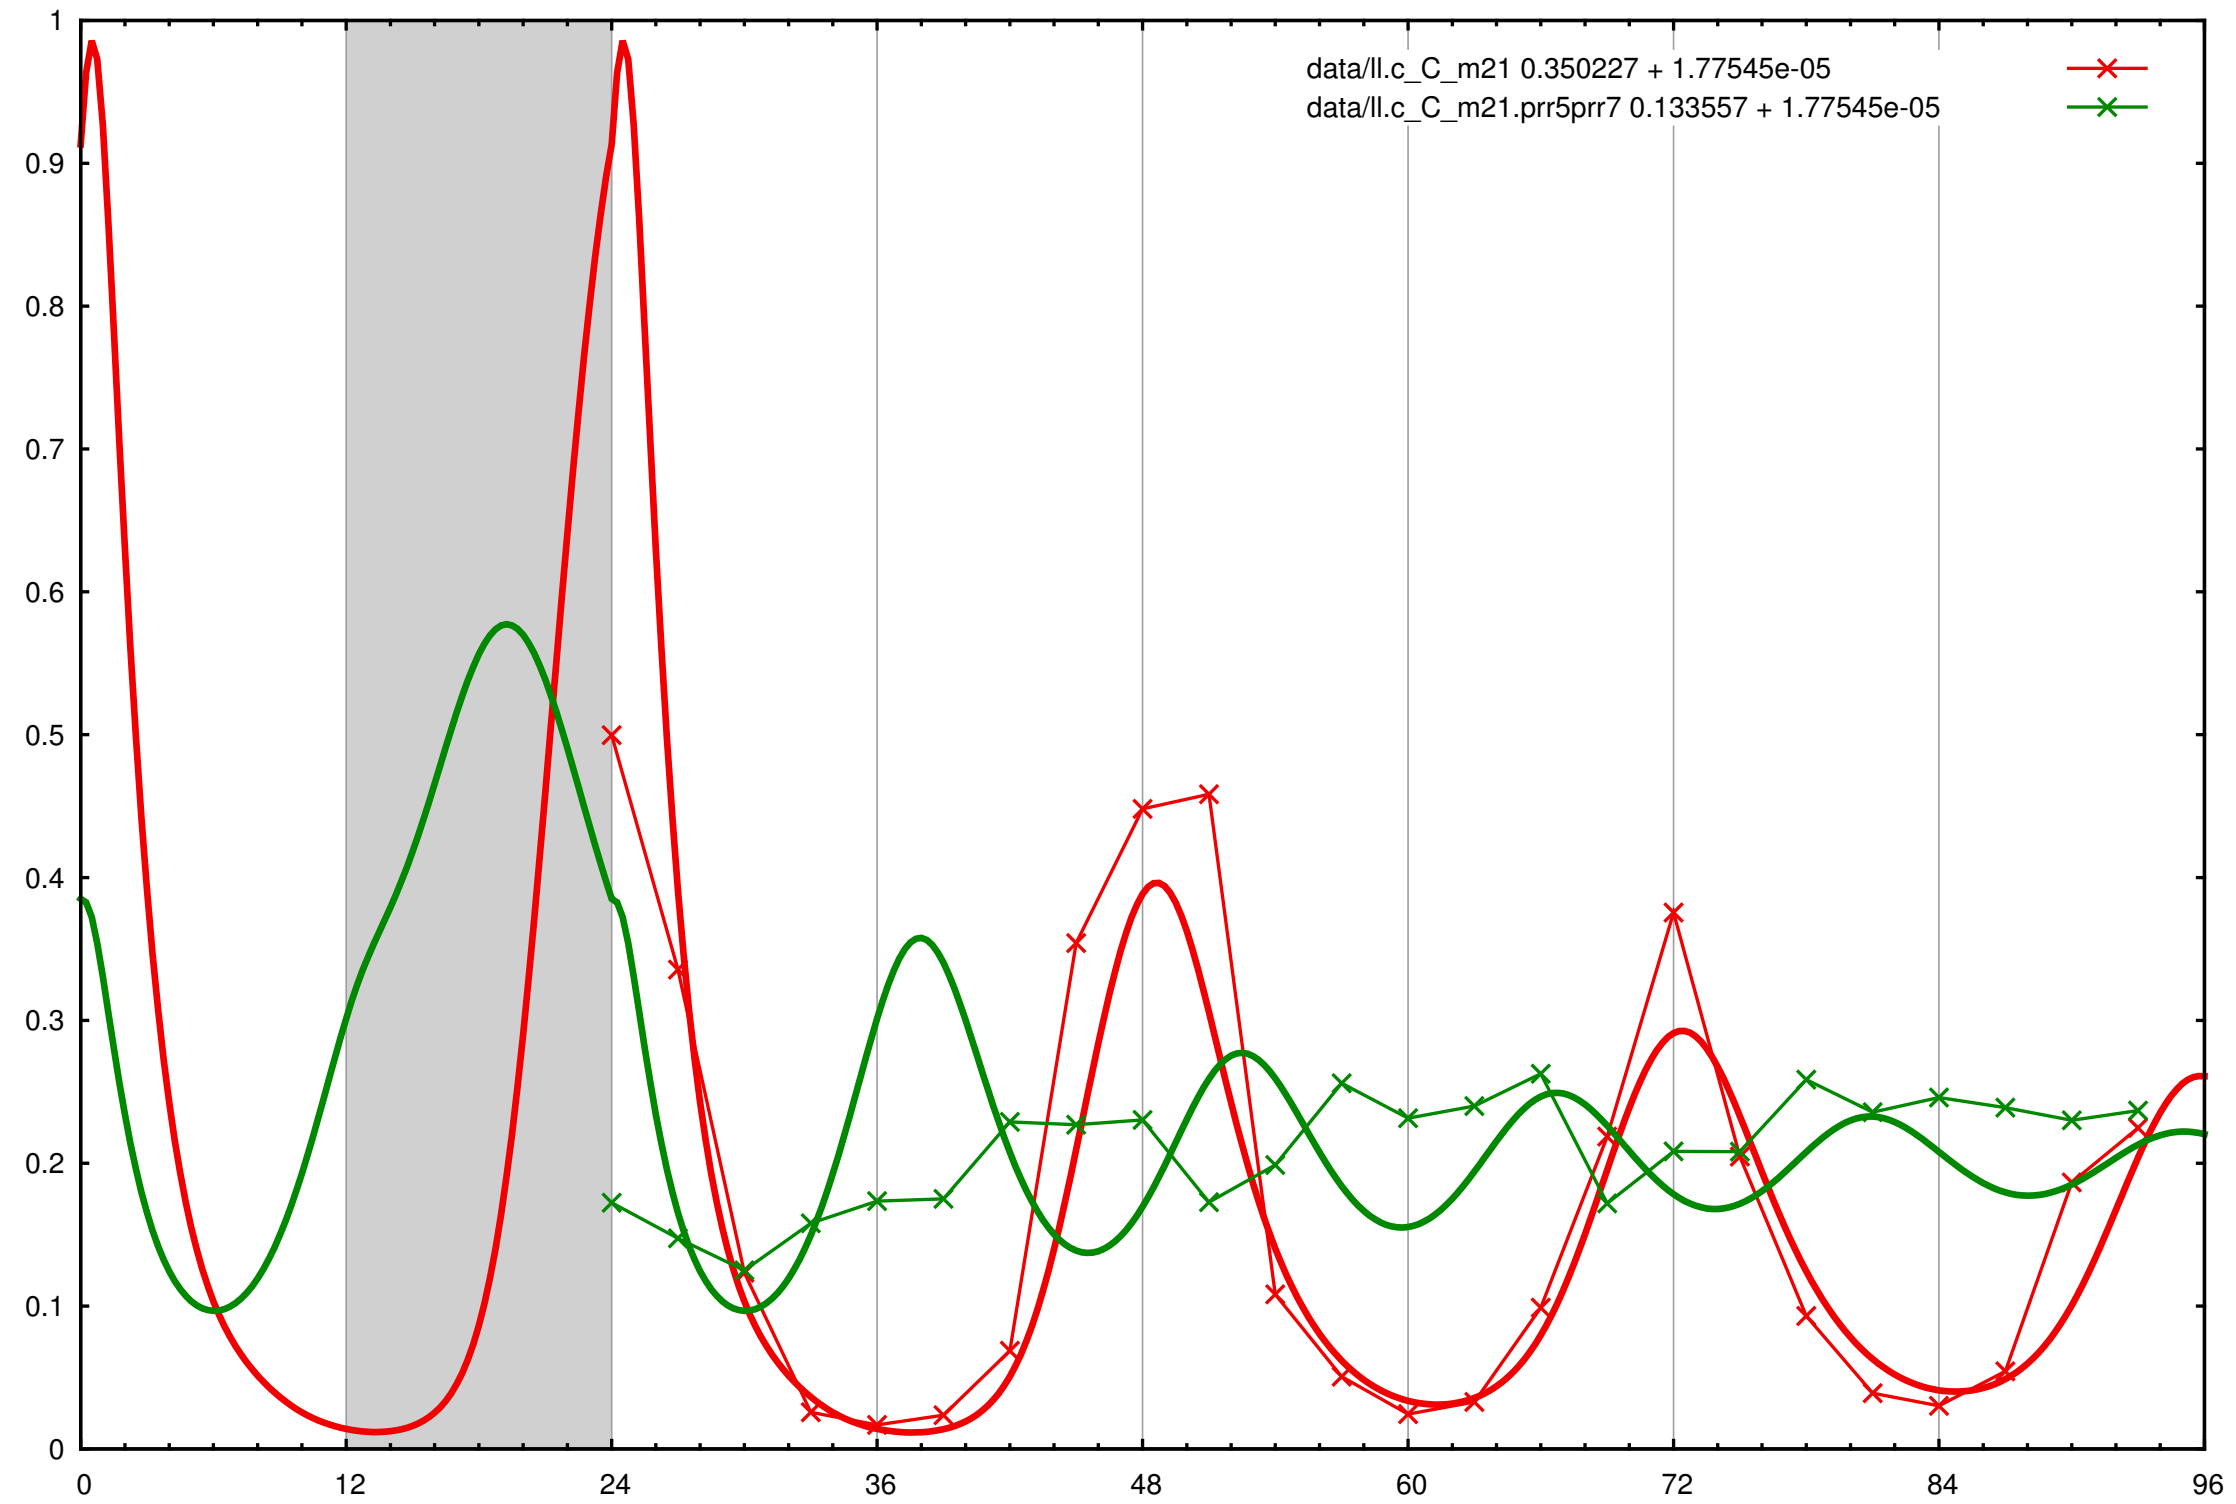



Scale group 193, scost 0.0639934

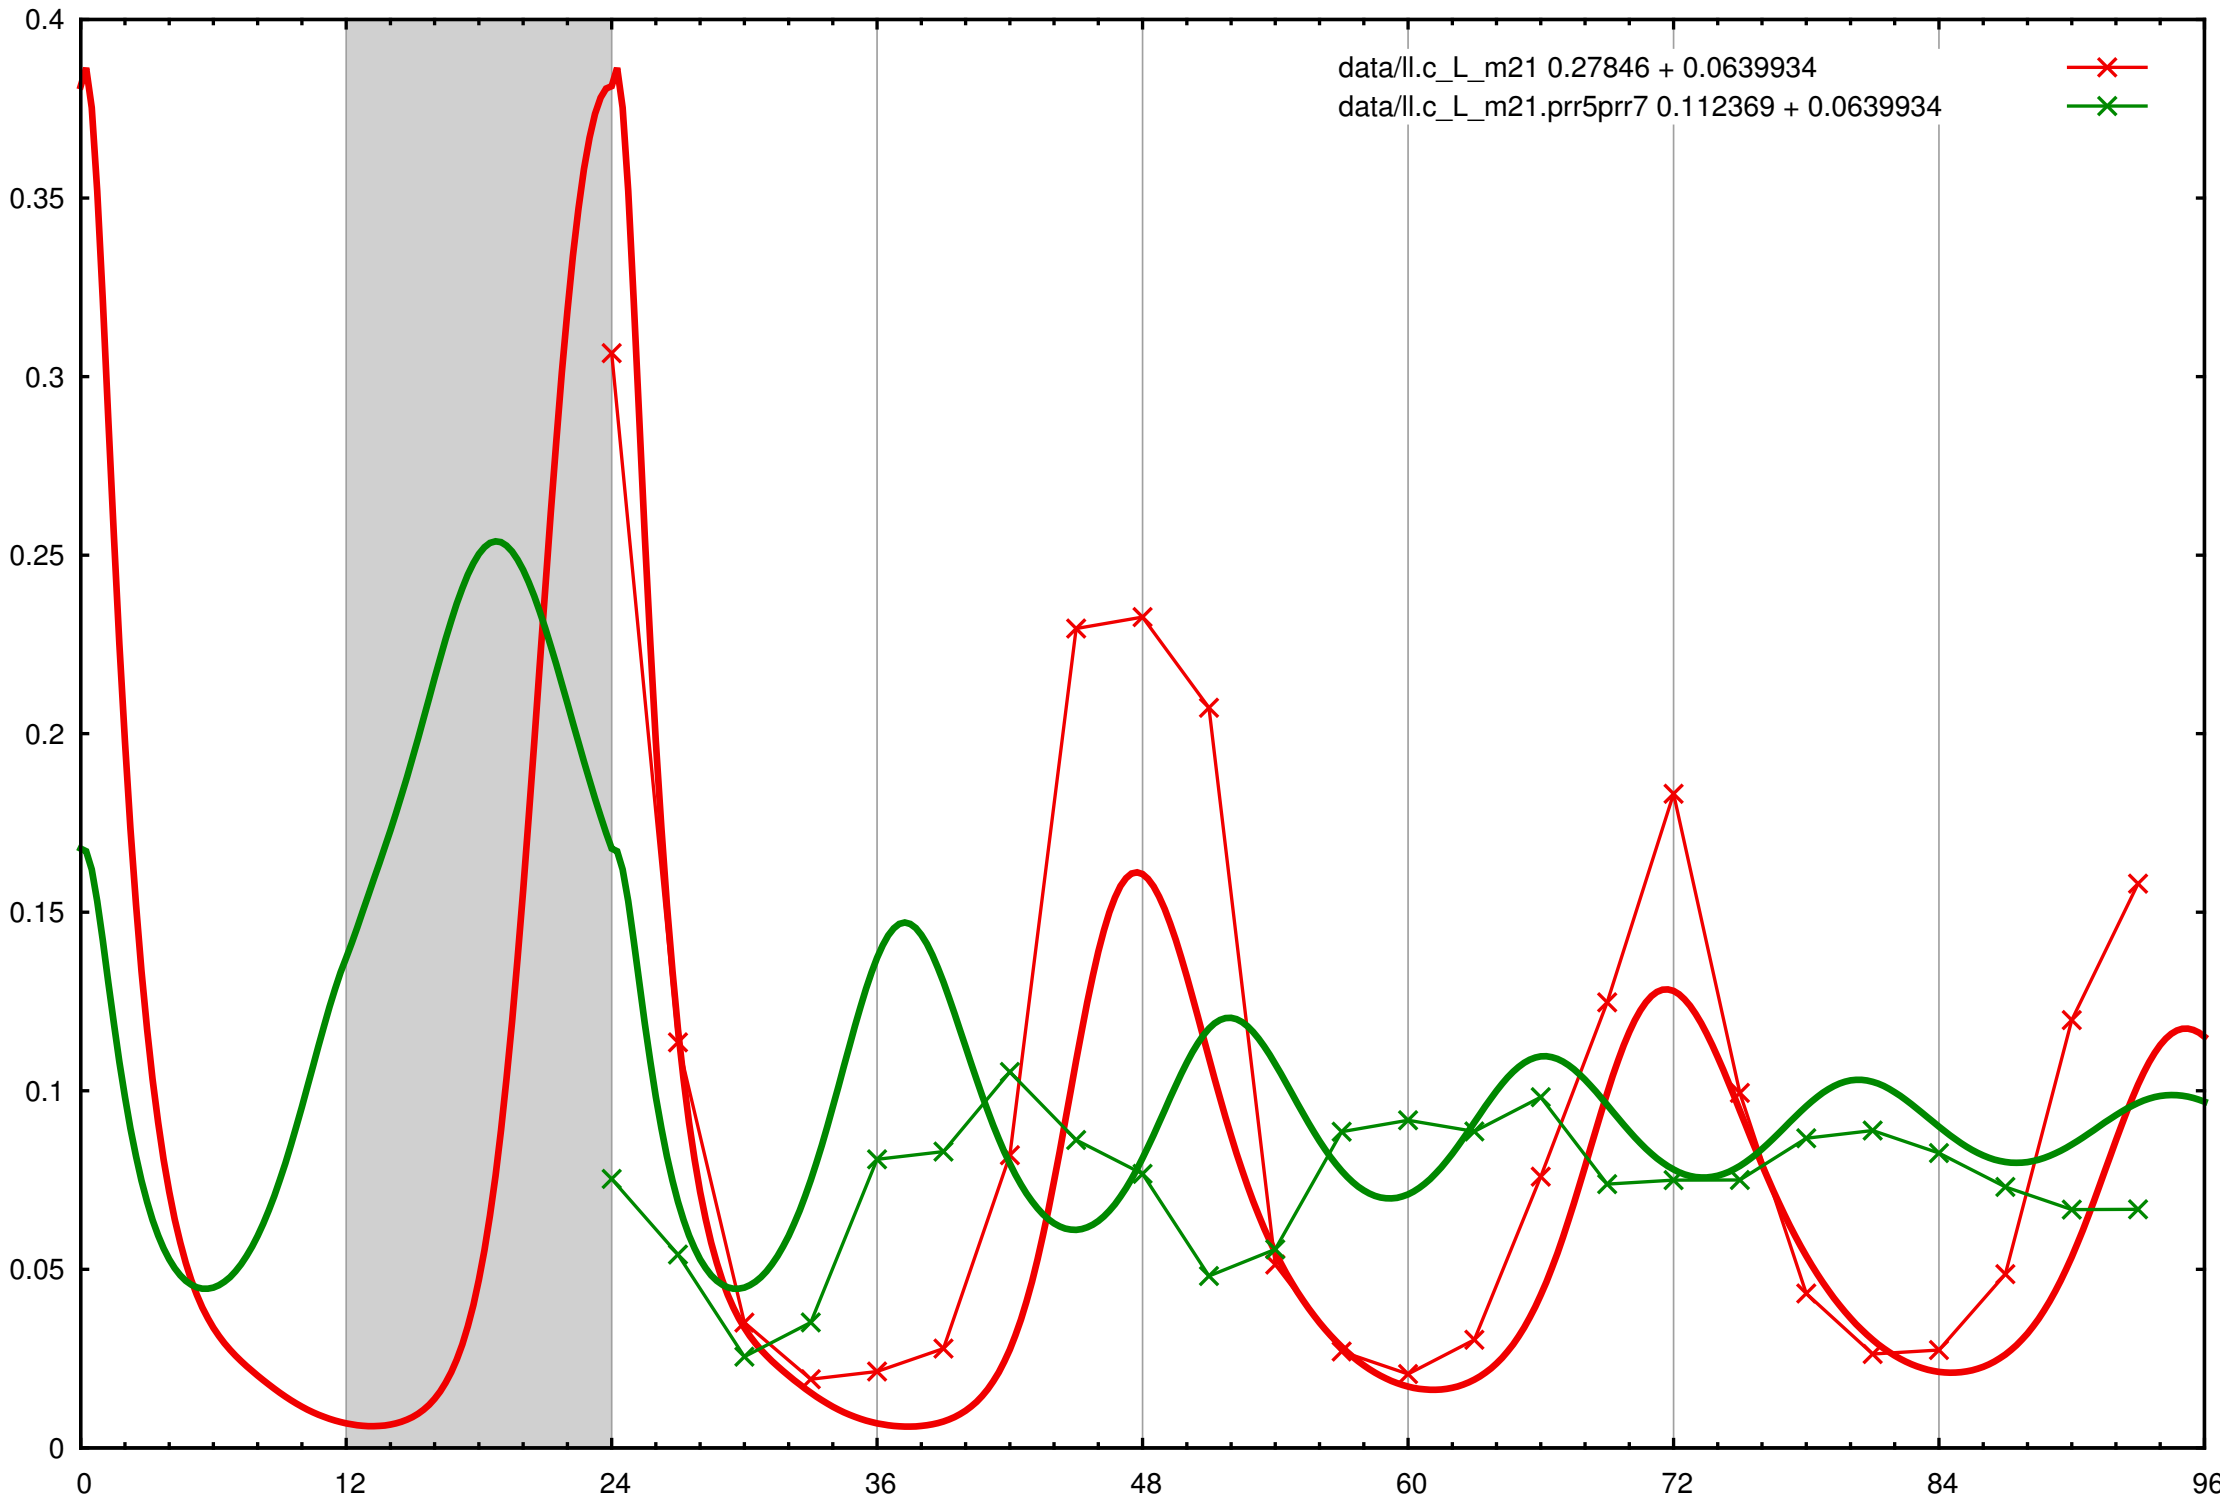

Scale group 194, scost 0.025693

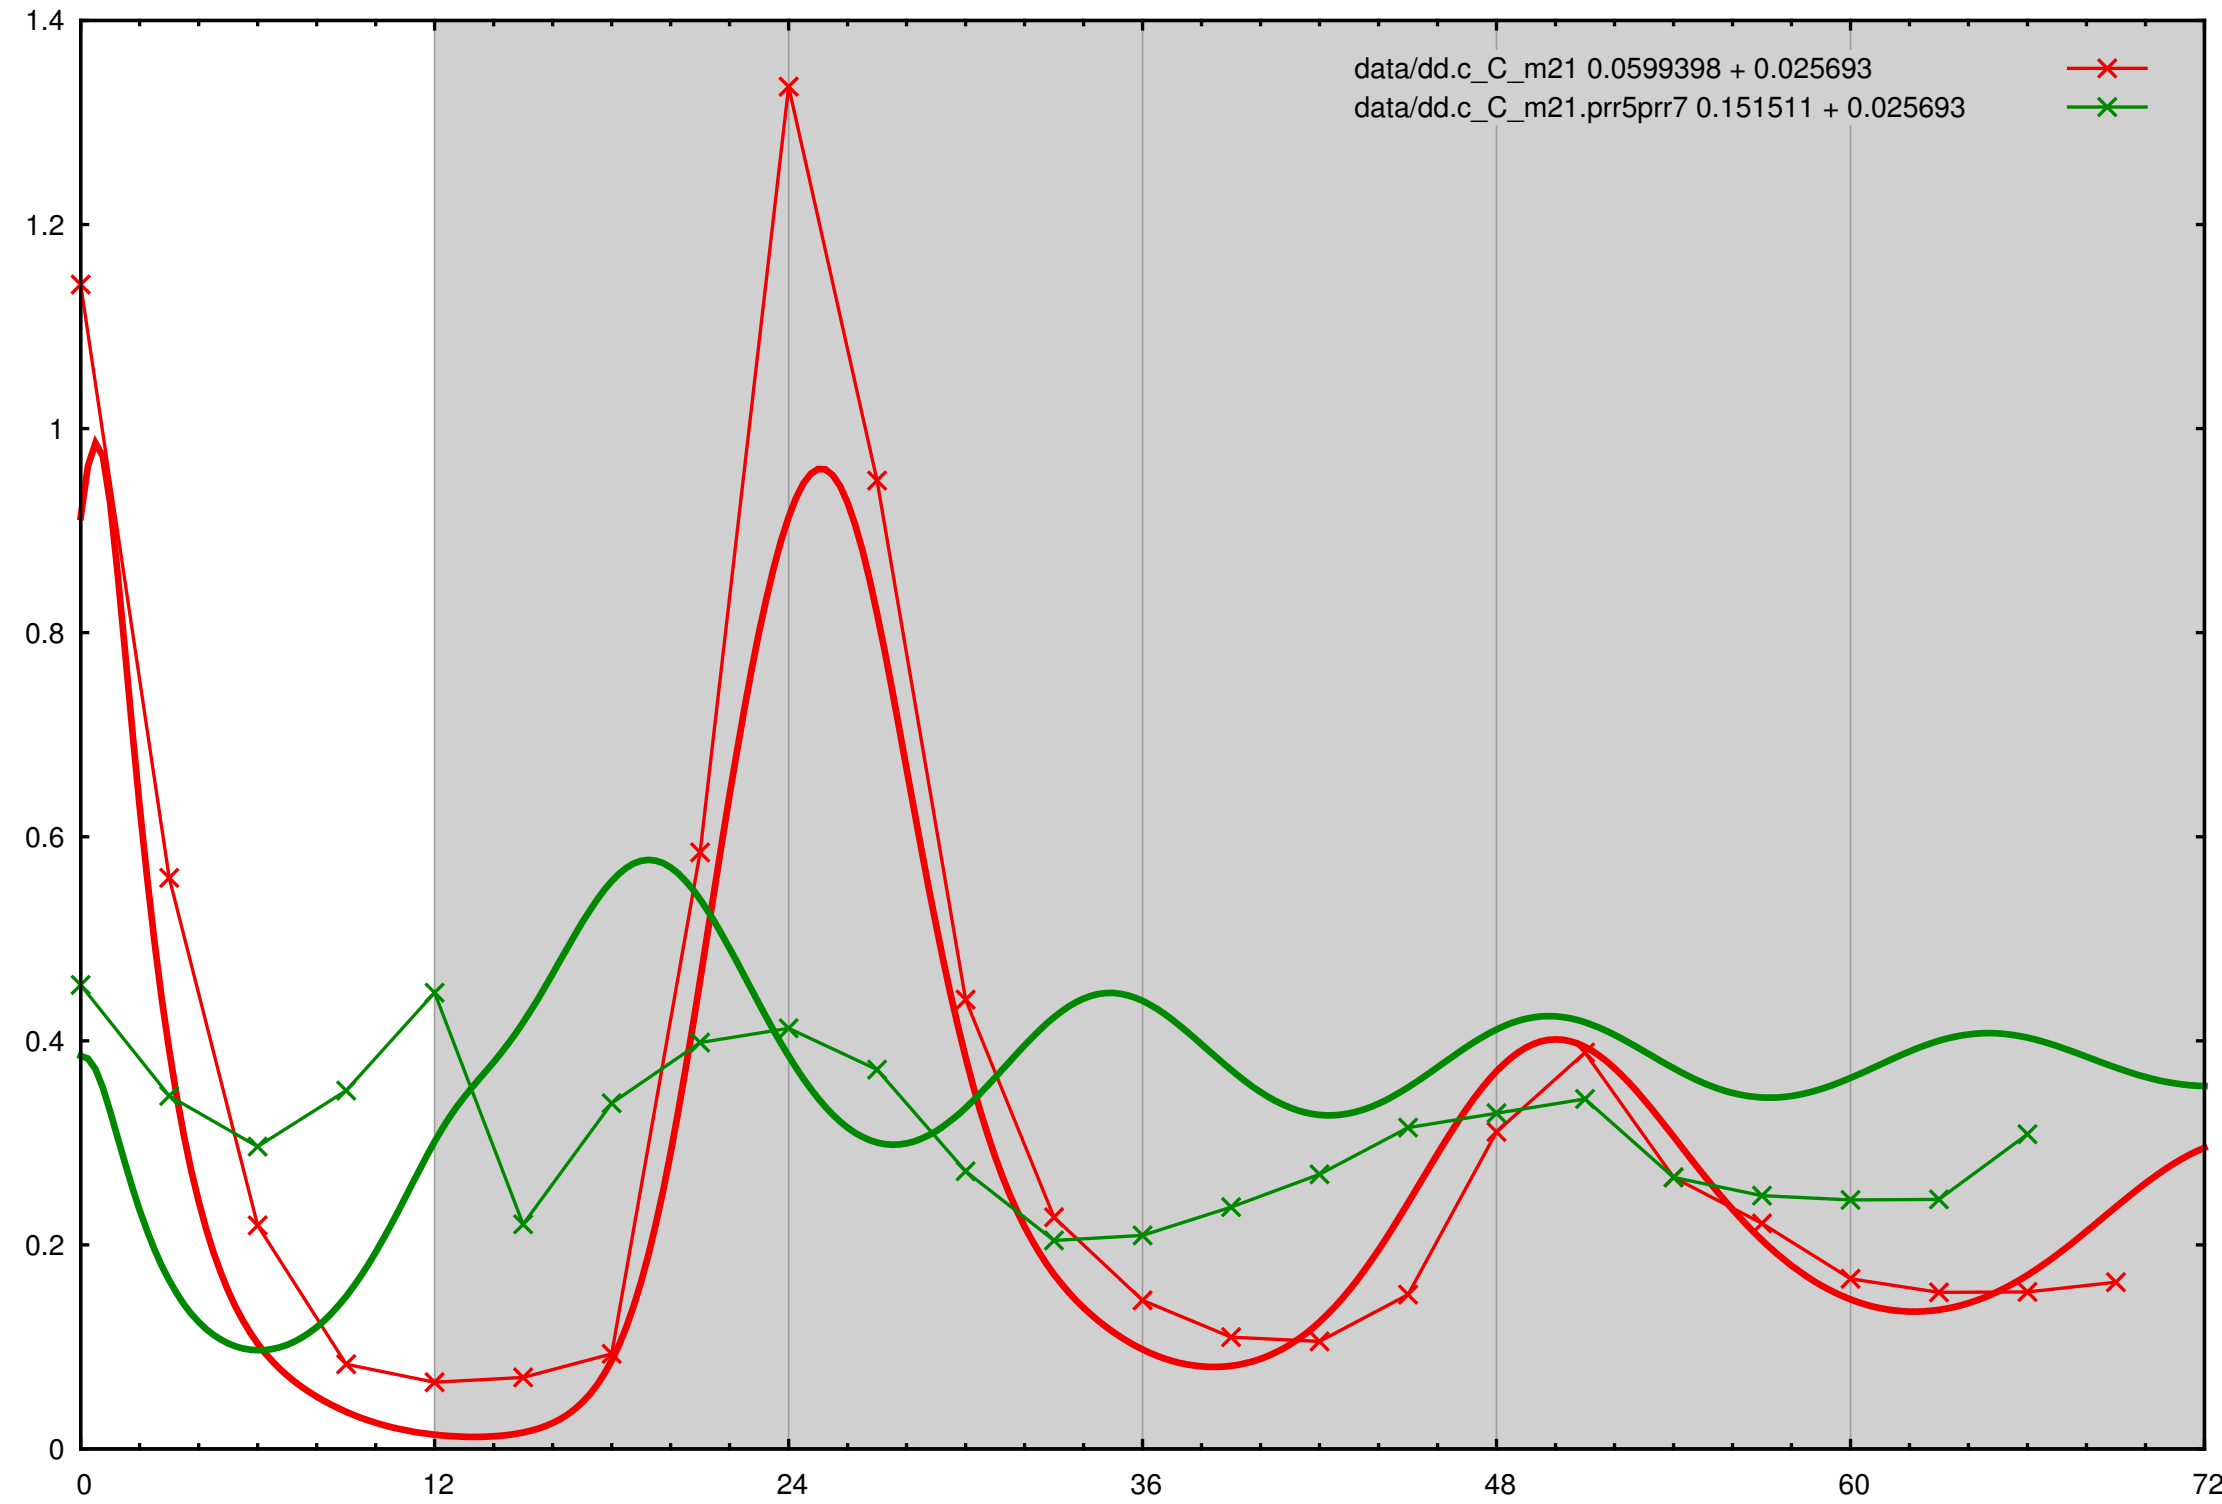

Scale group 195, scost 0.124901

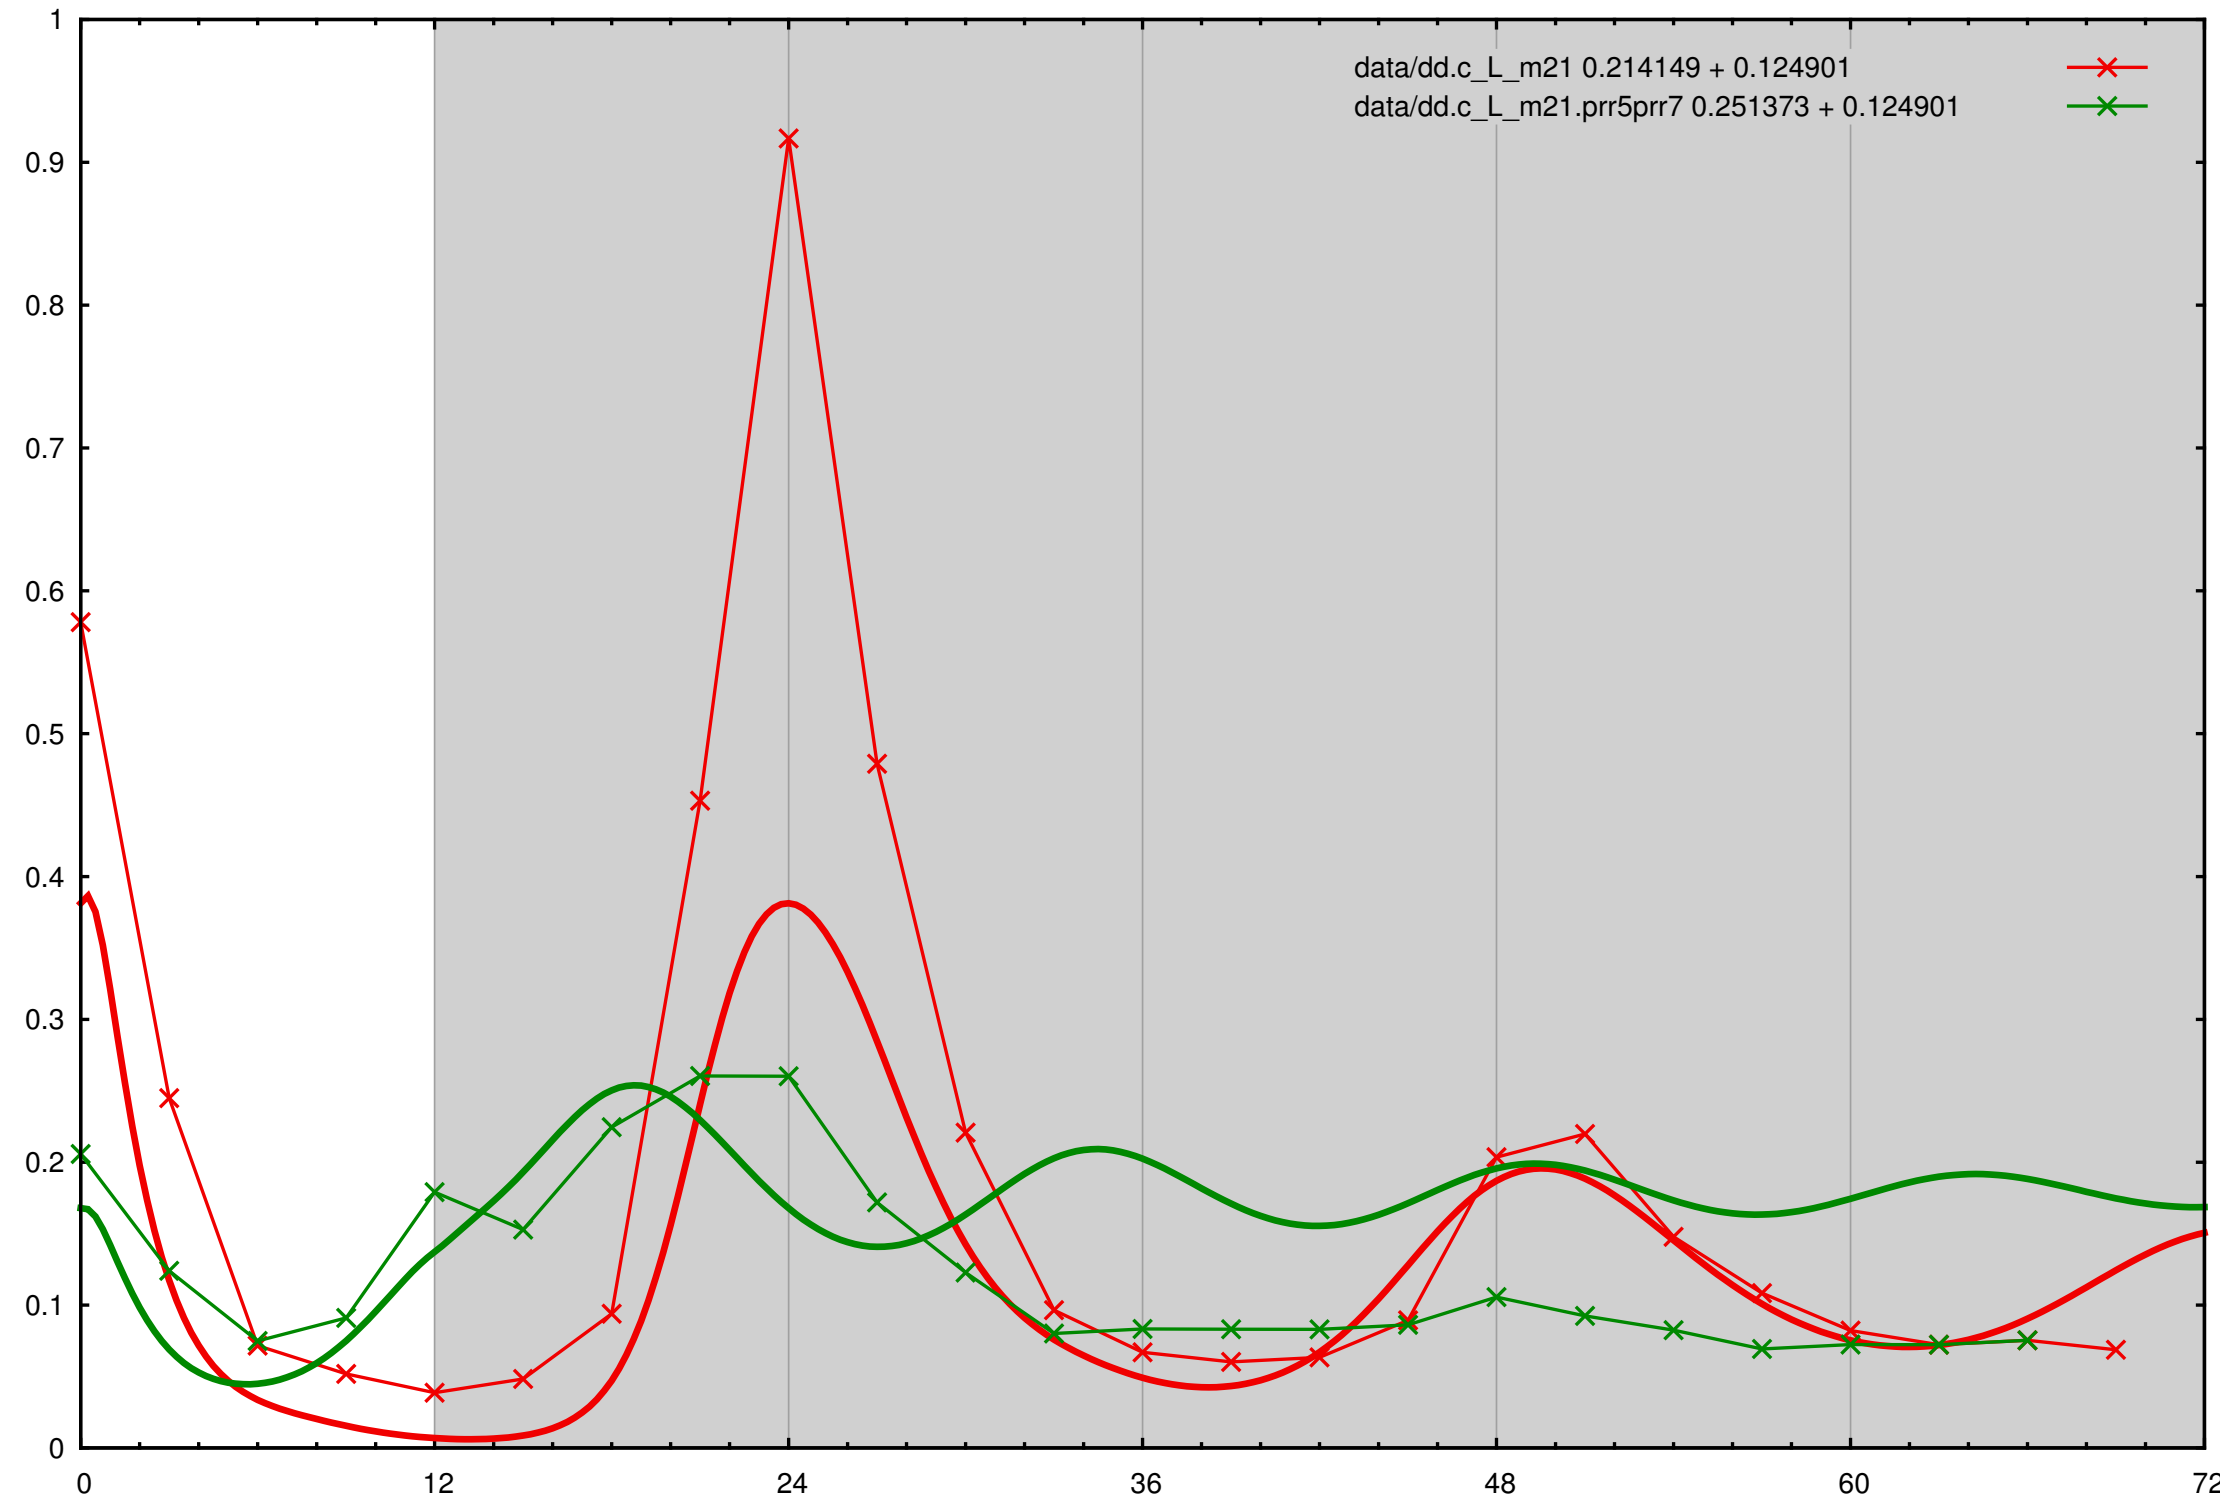

Scale group 196, scost 0.0392042

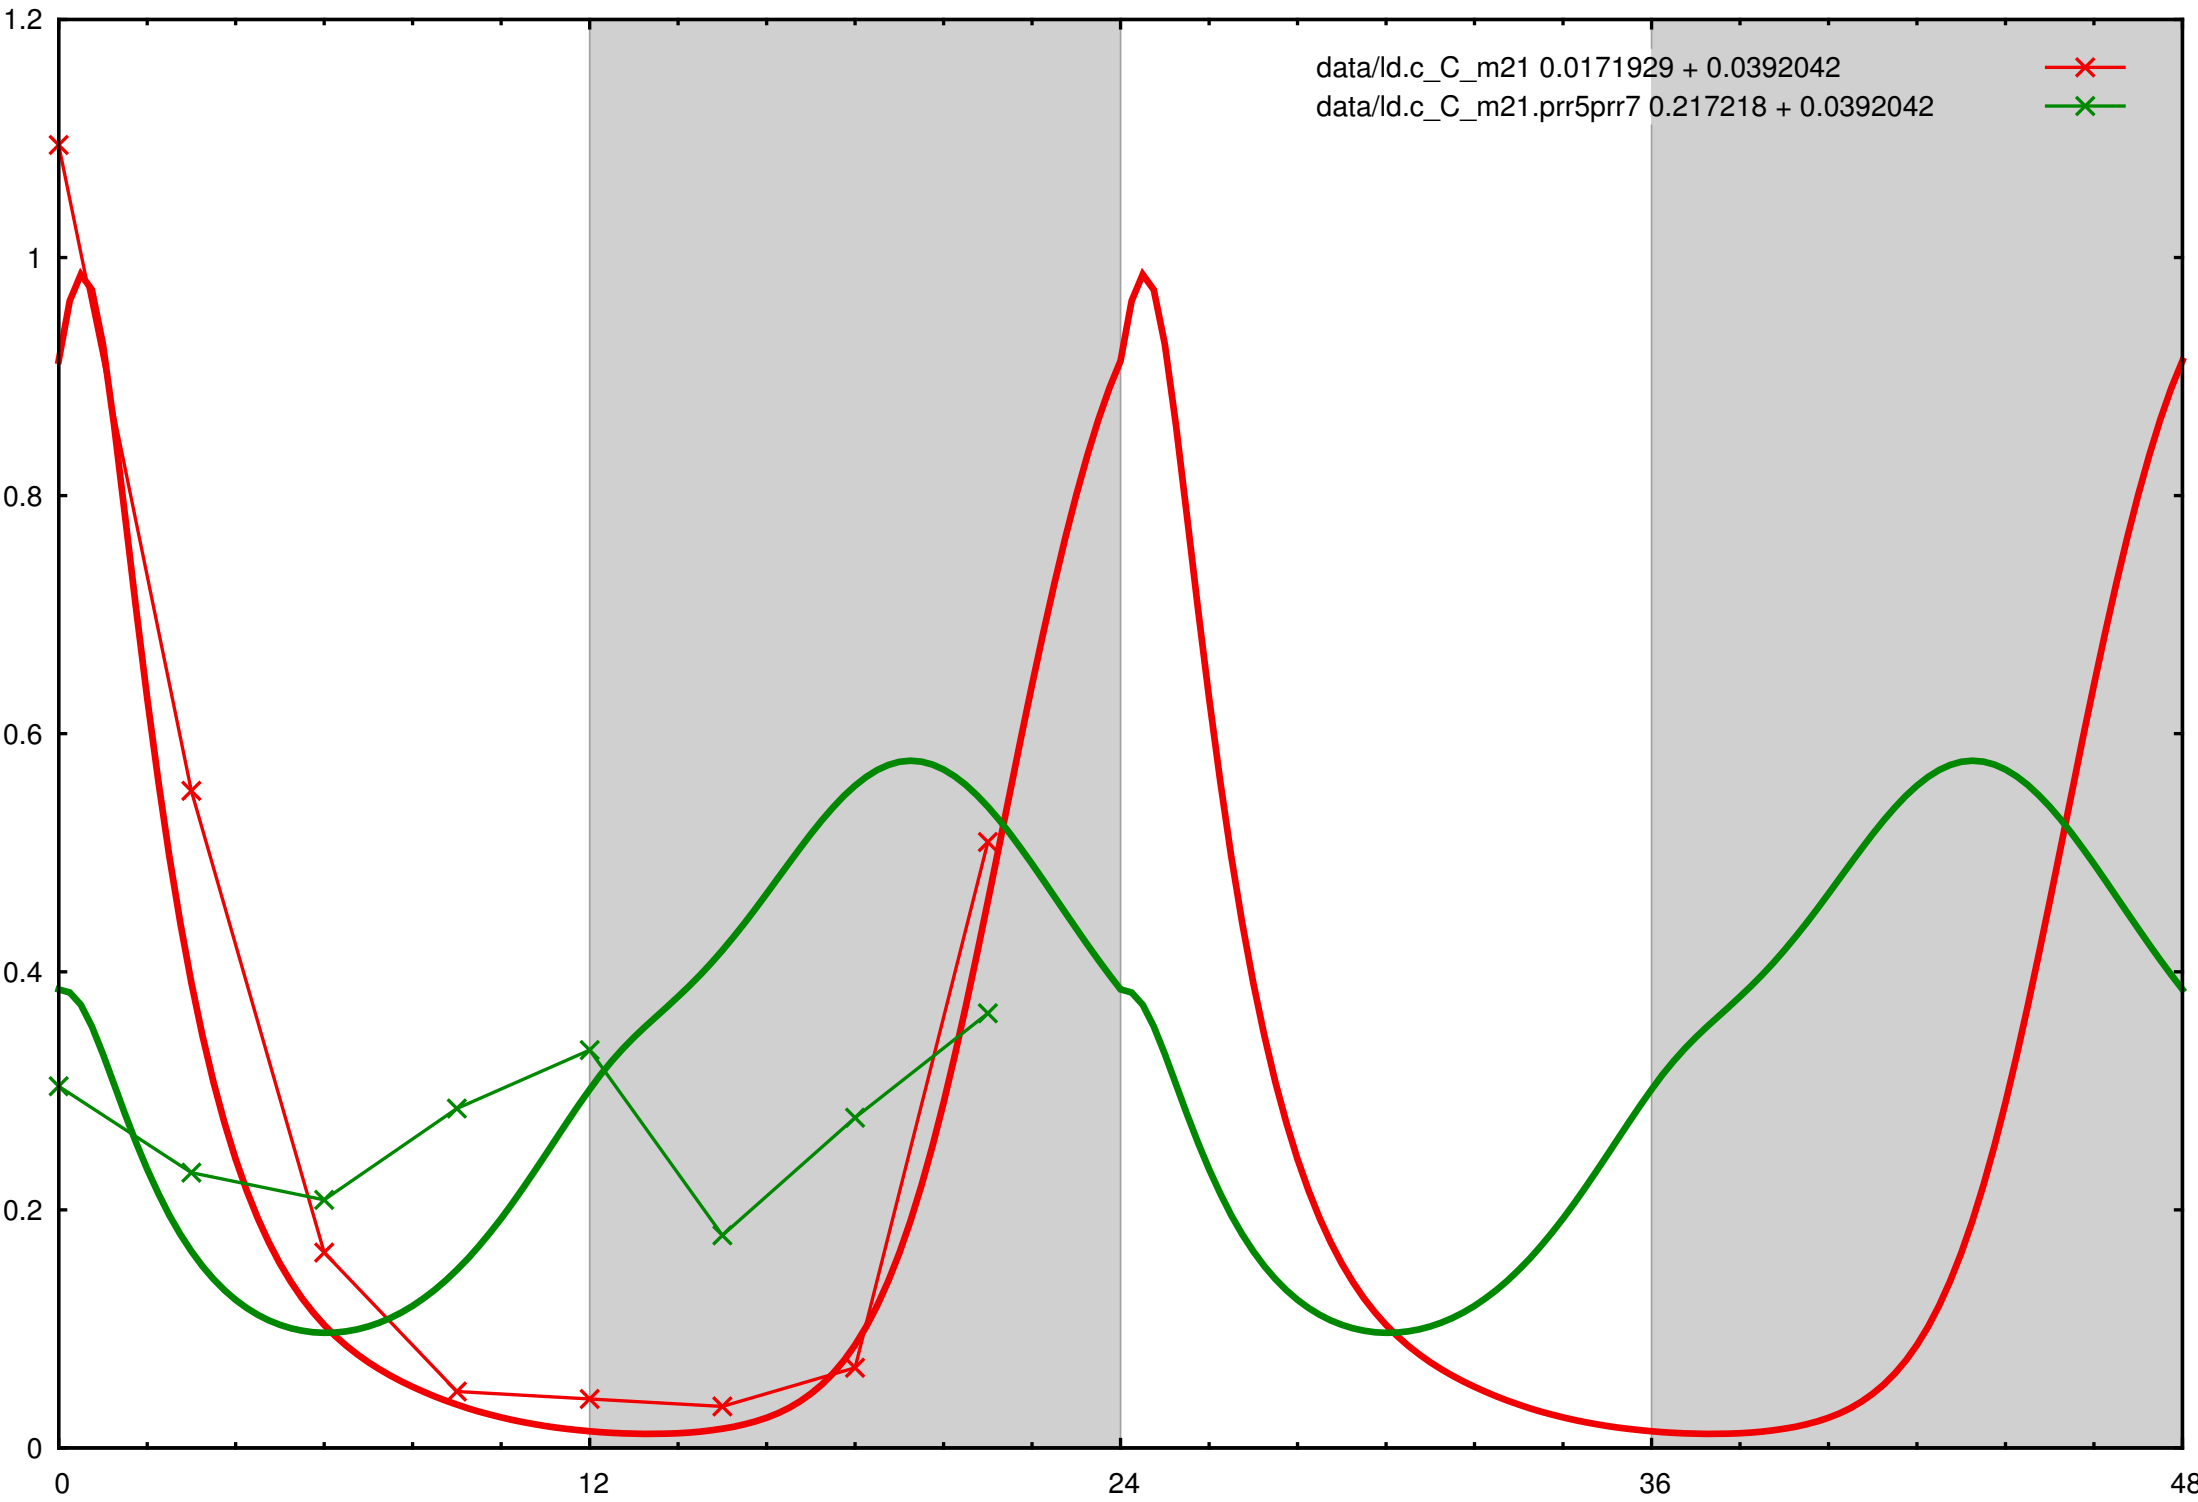

Scale group 197, scost 0.075929

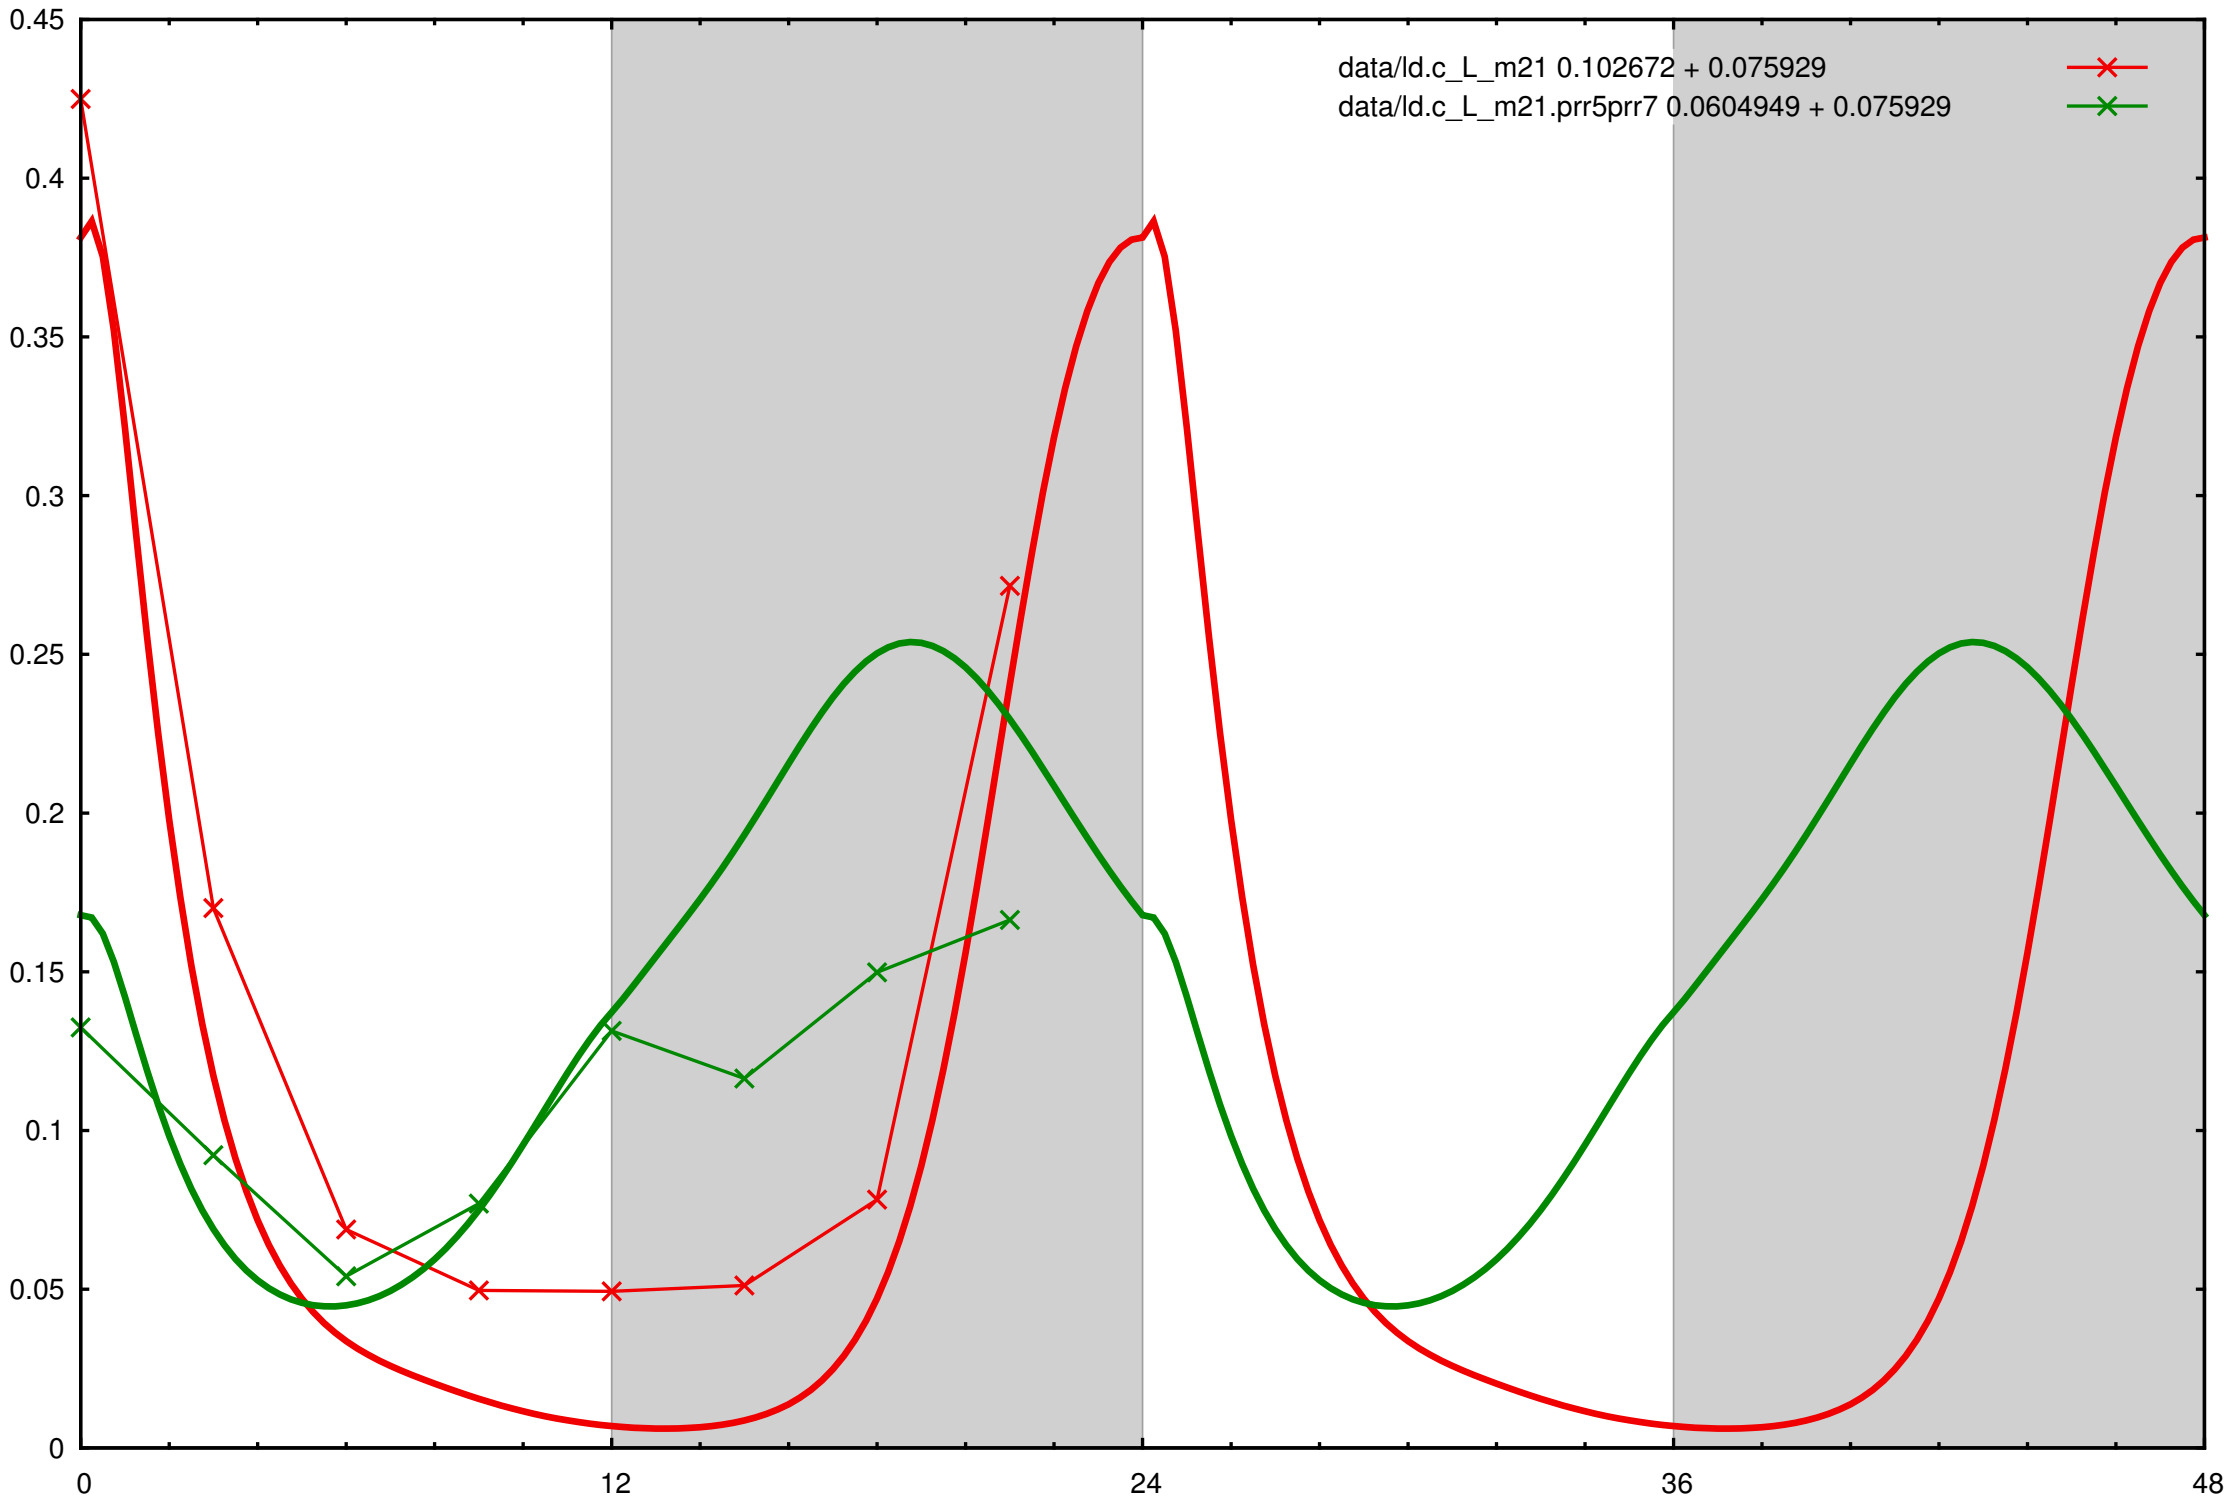

Scale group 198, scost 0.0339377

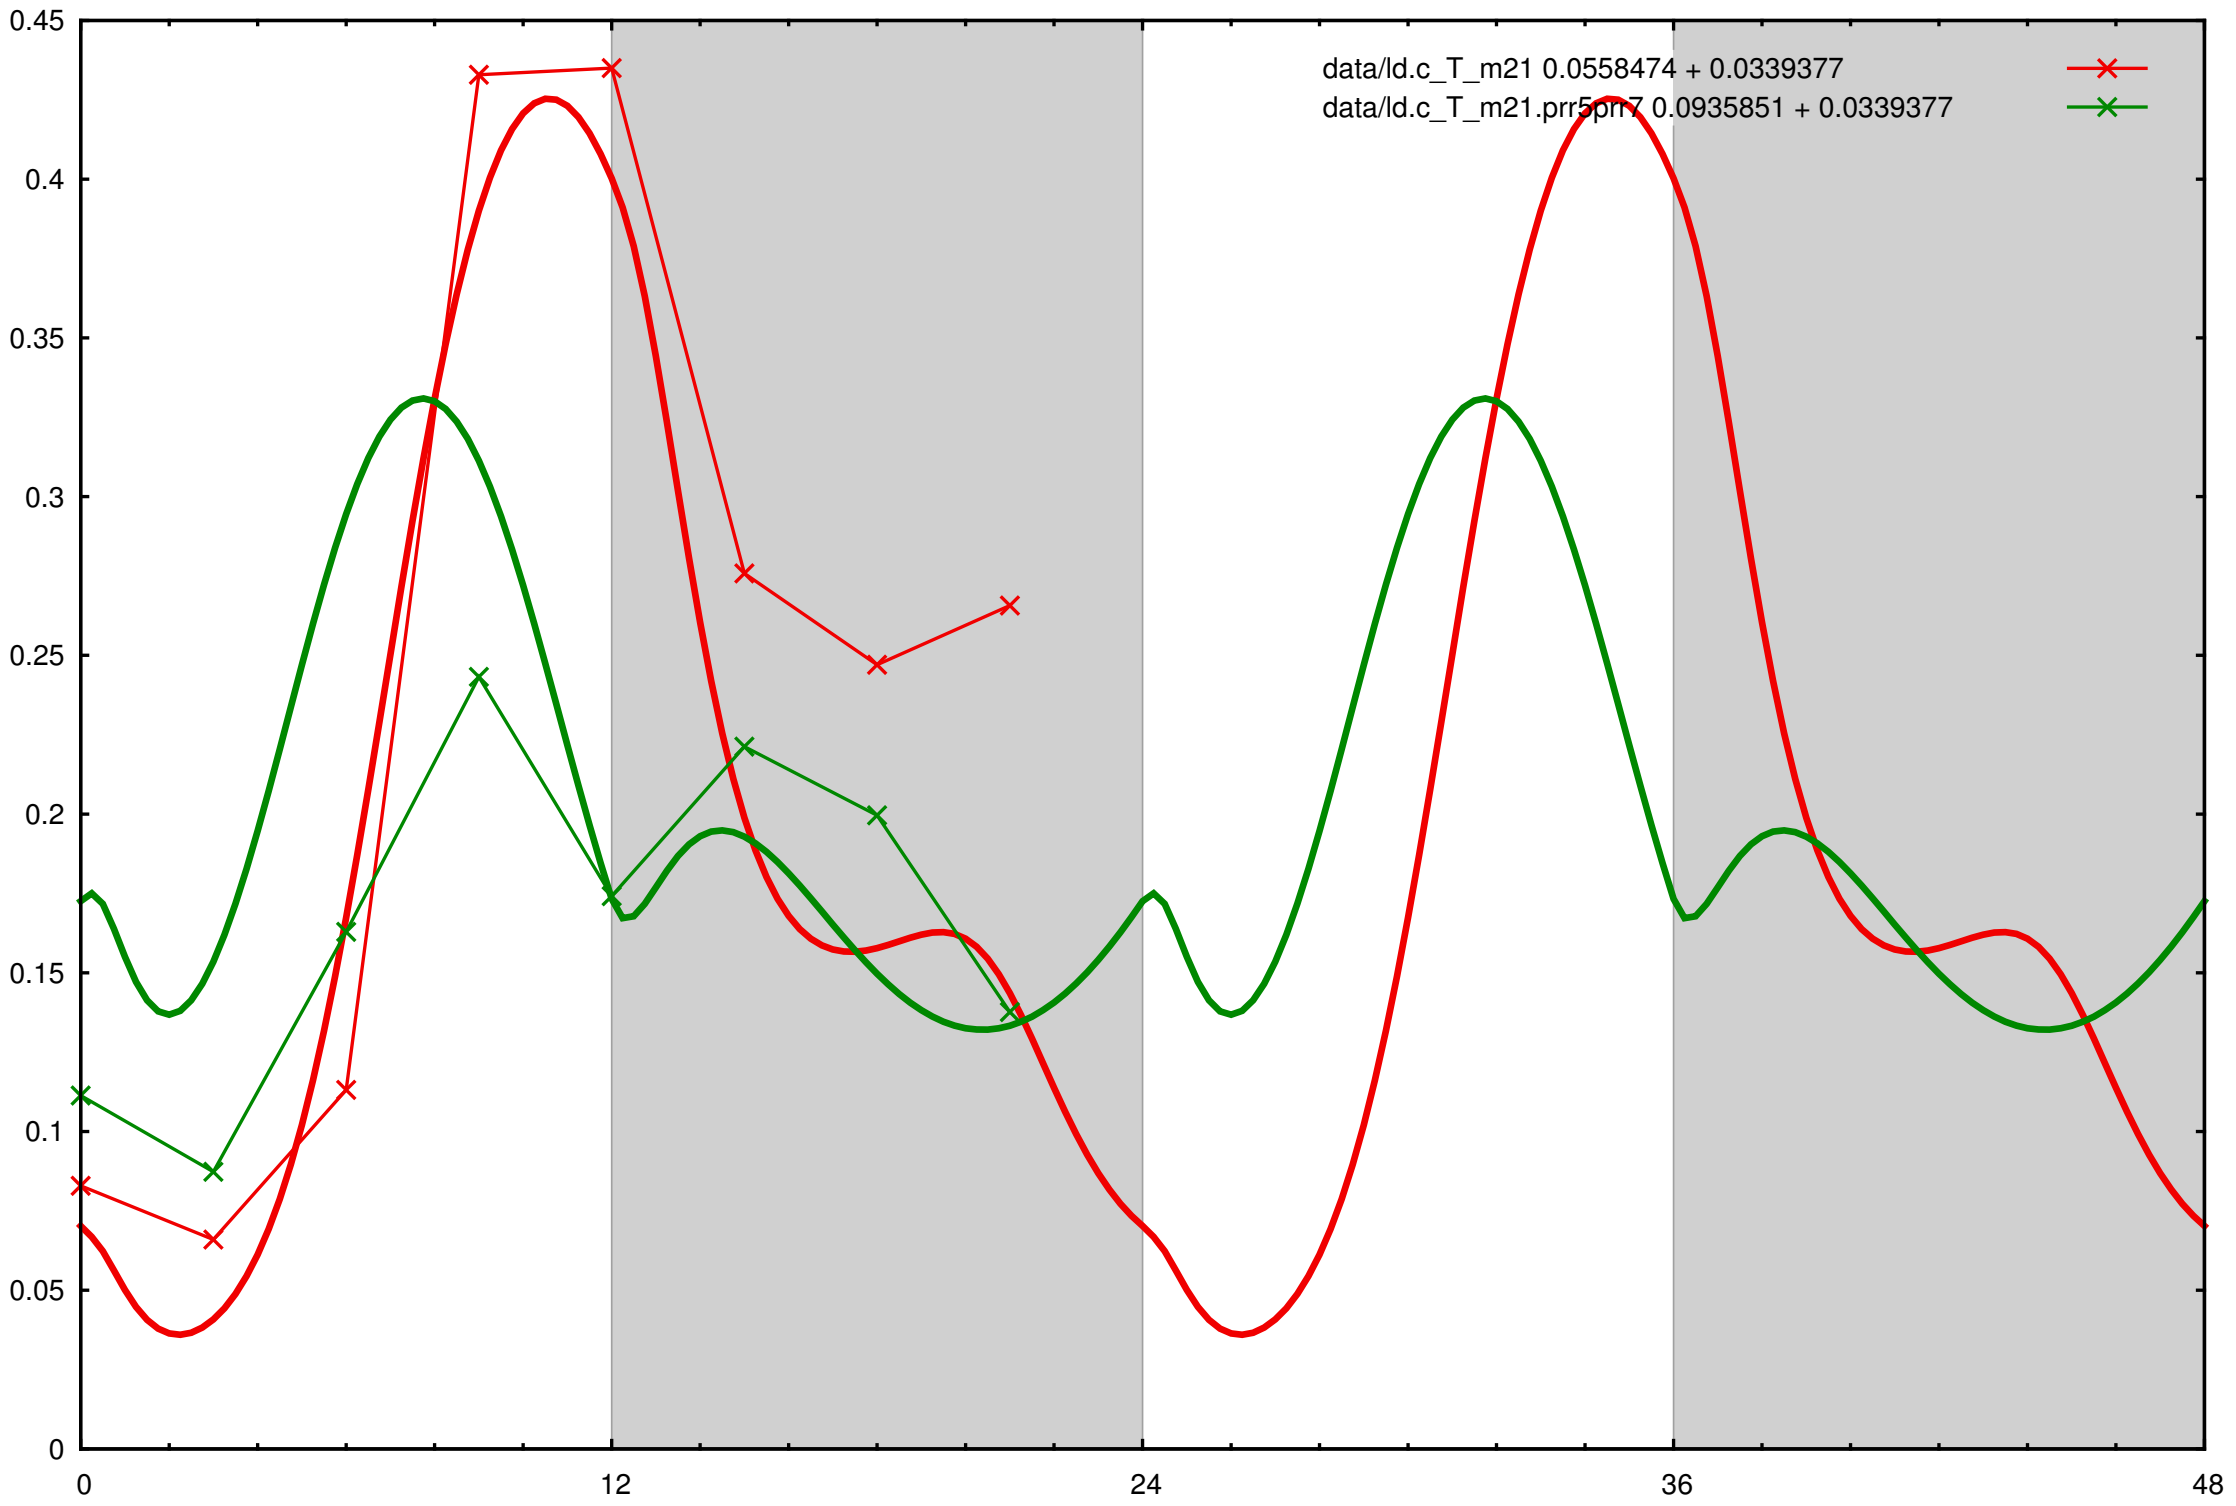

Scale group 199, scost 0.0112302

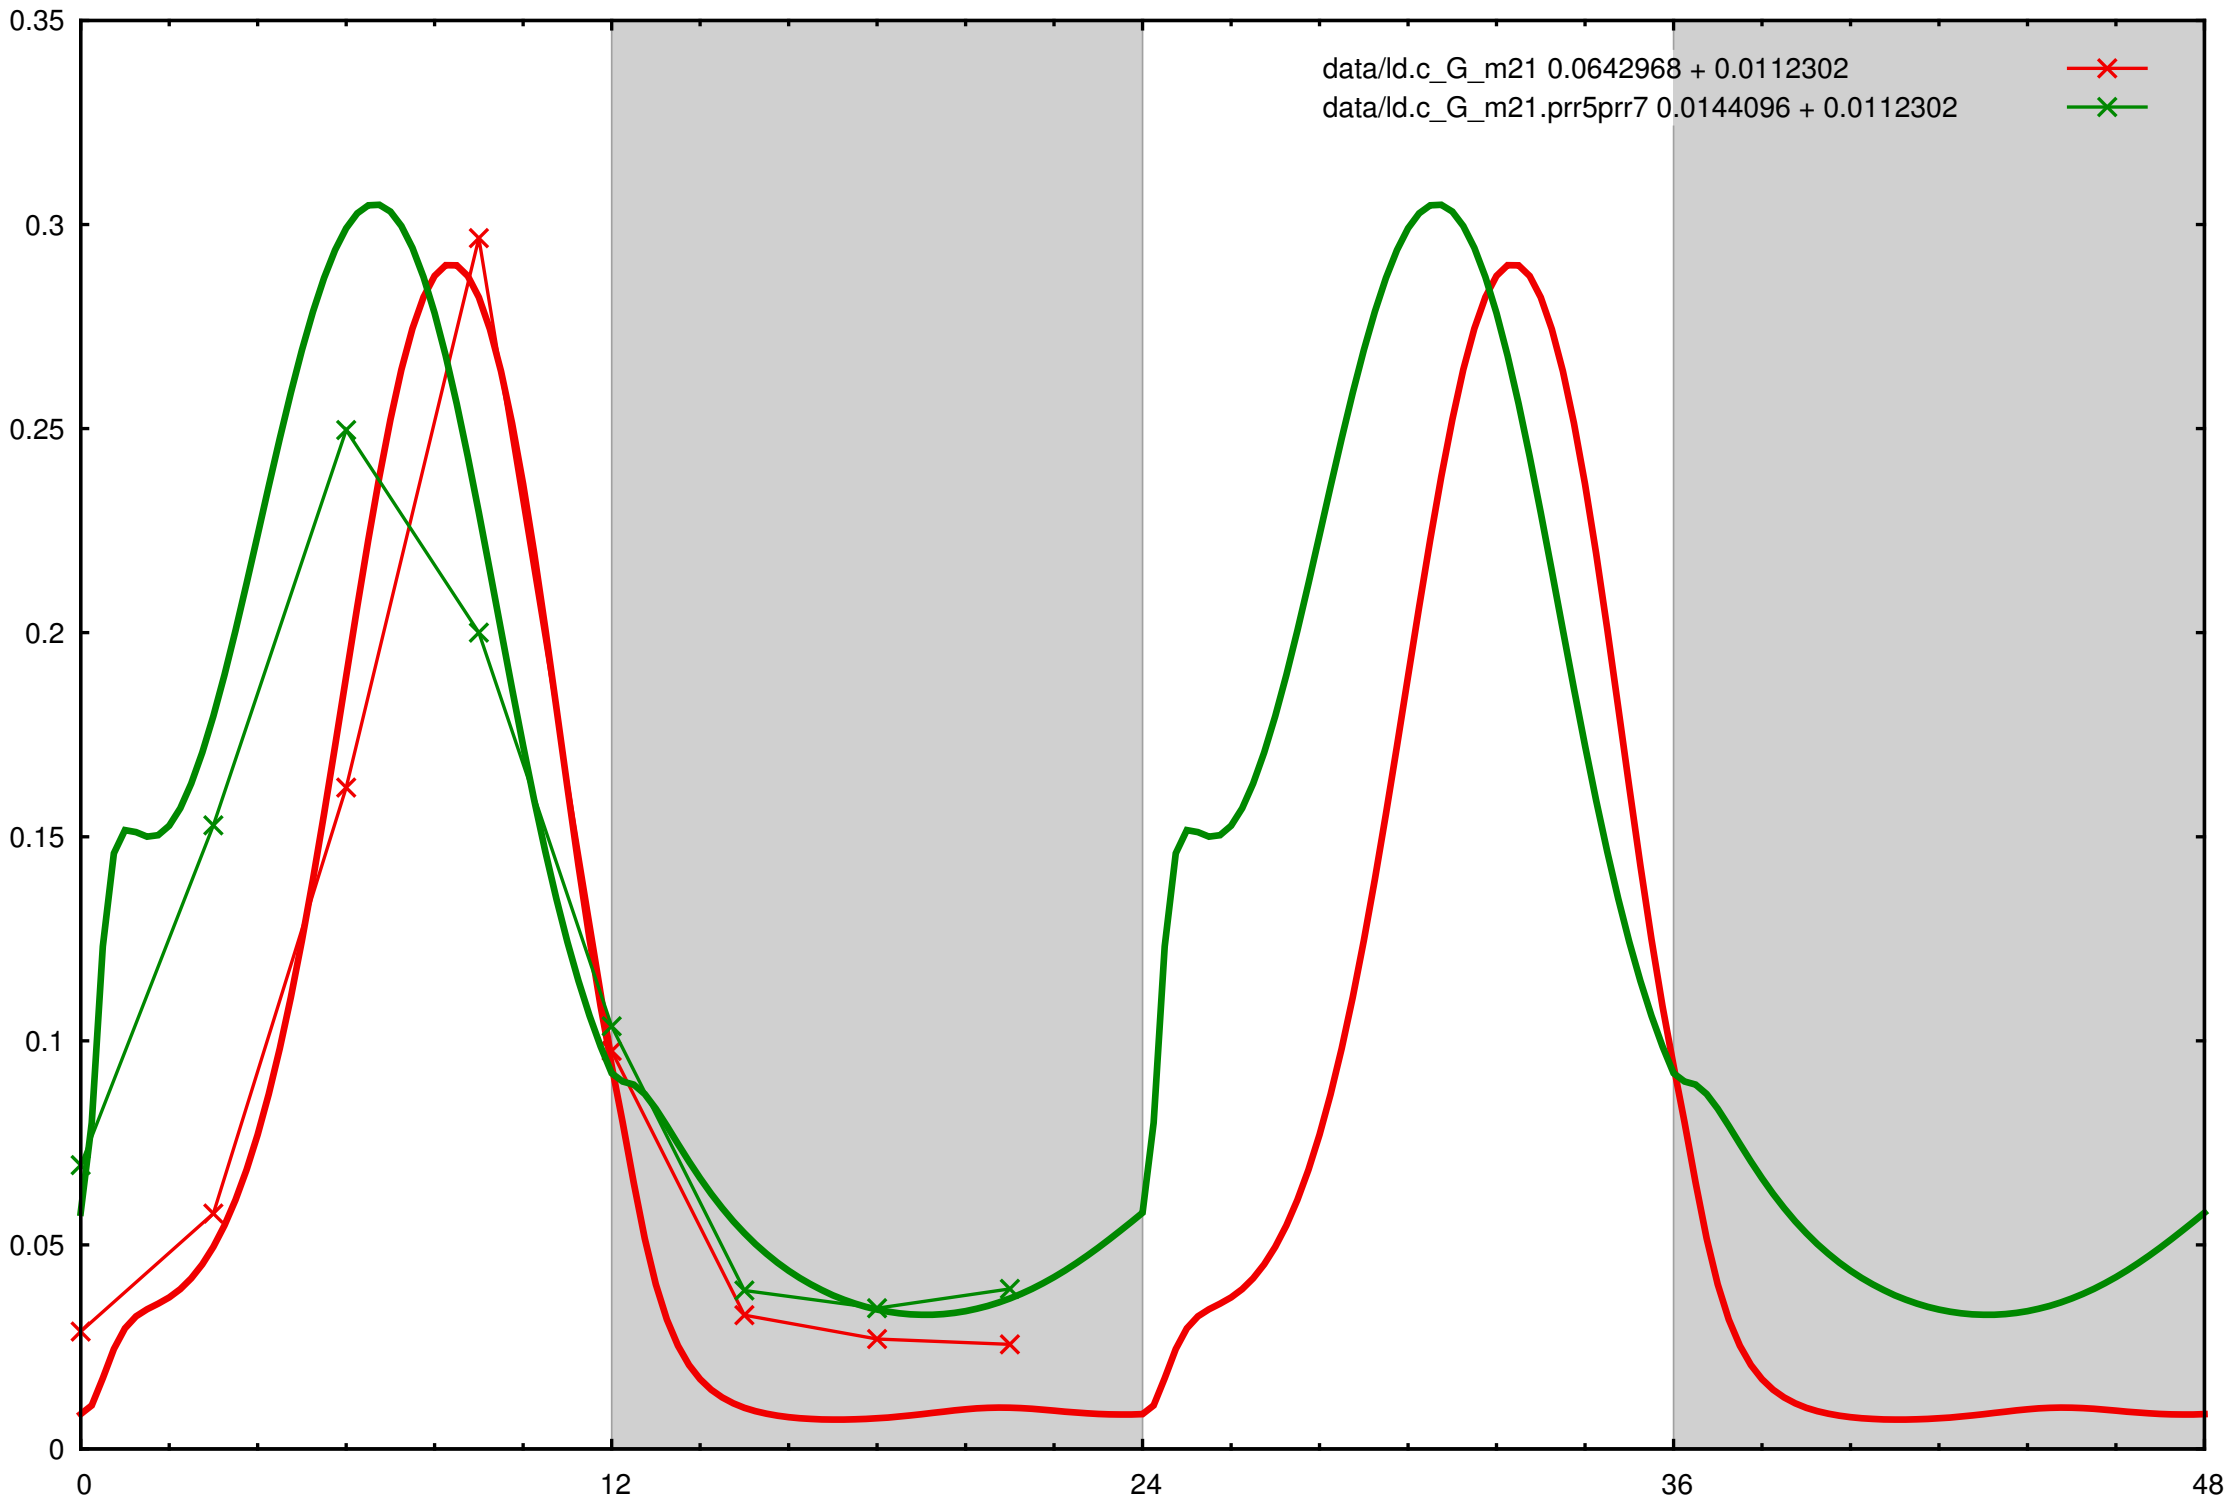

Scale group 200, scost 0.00539075

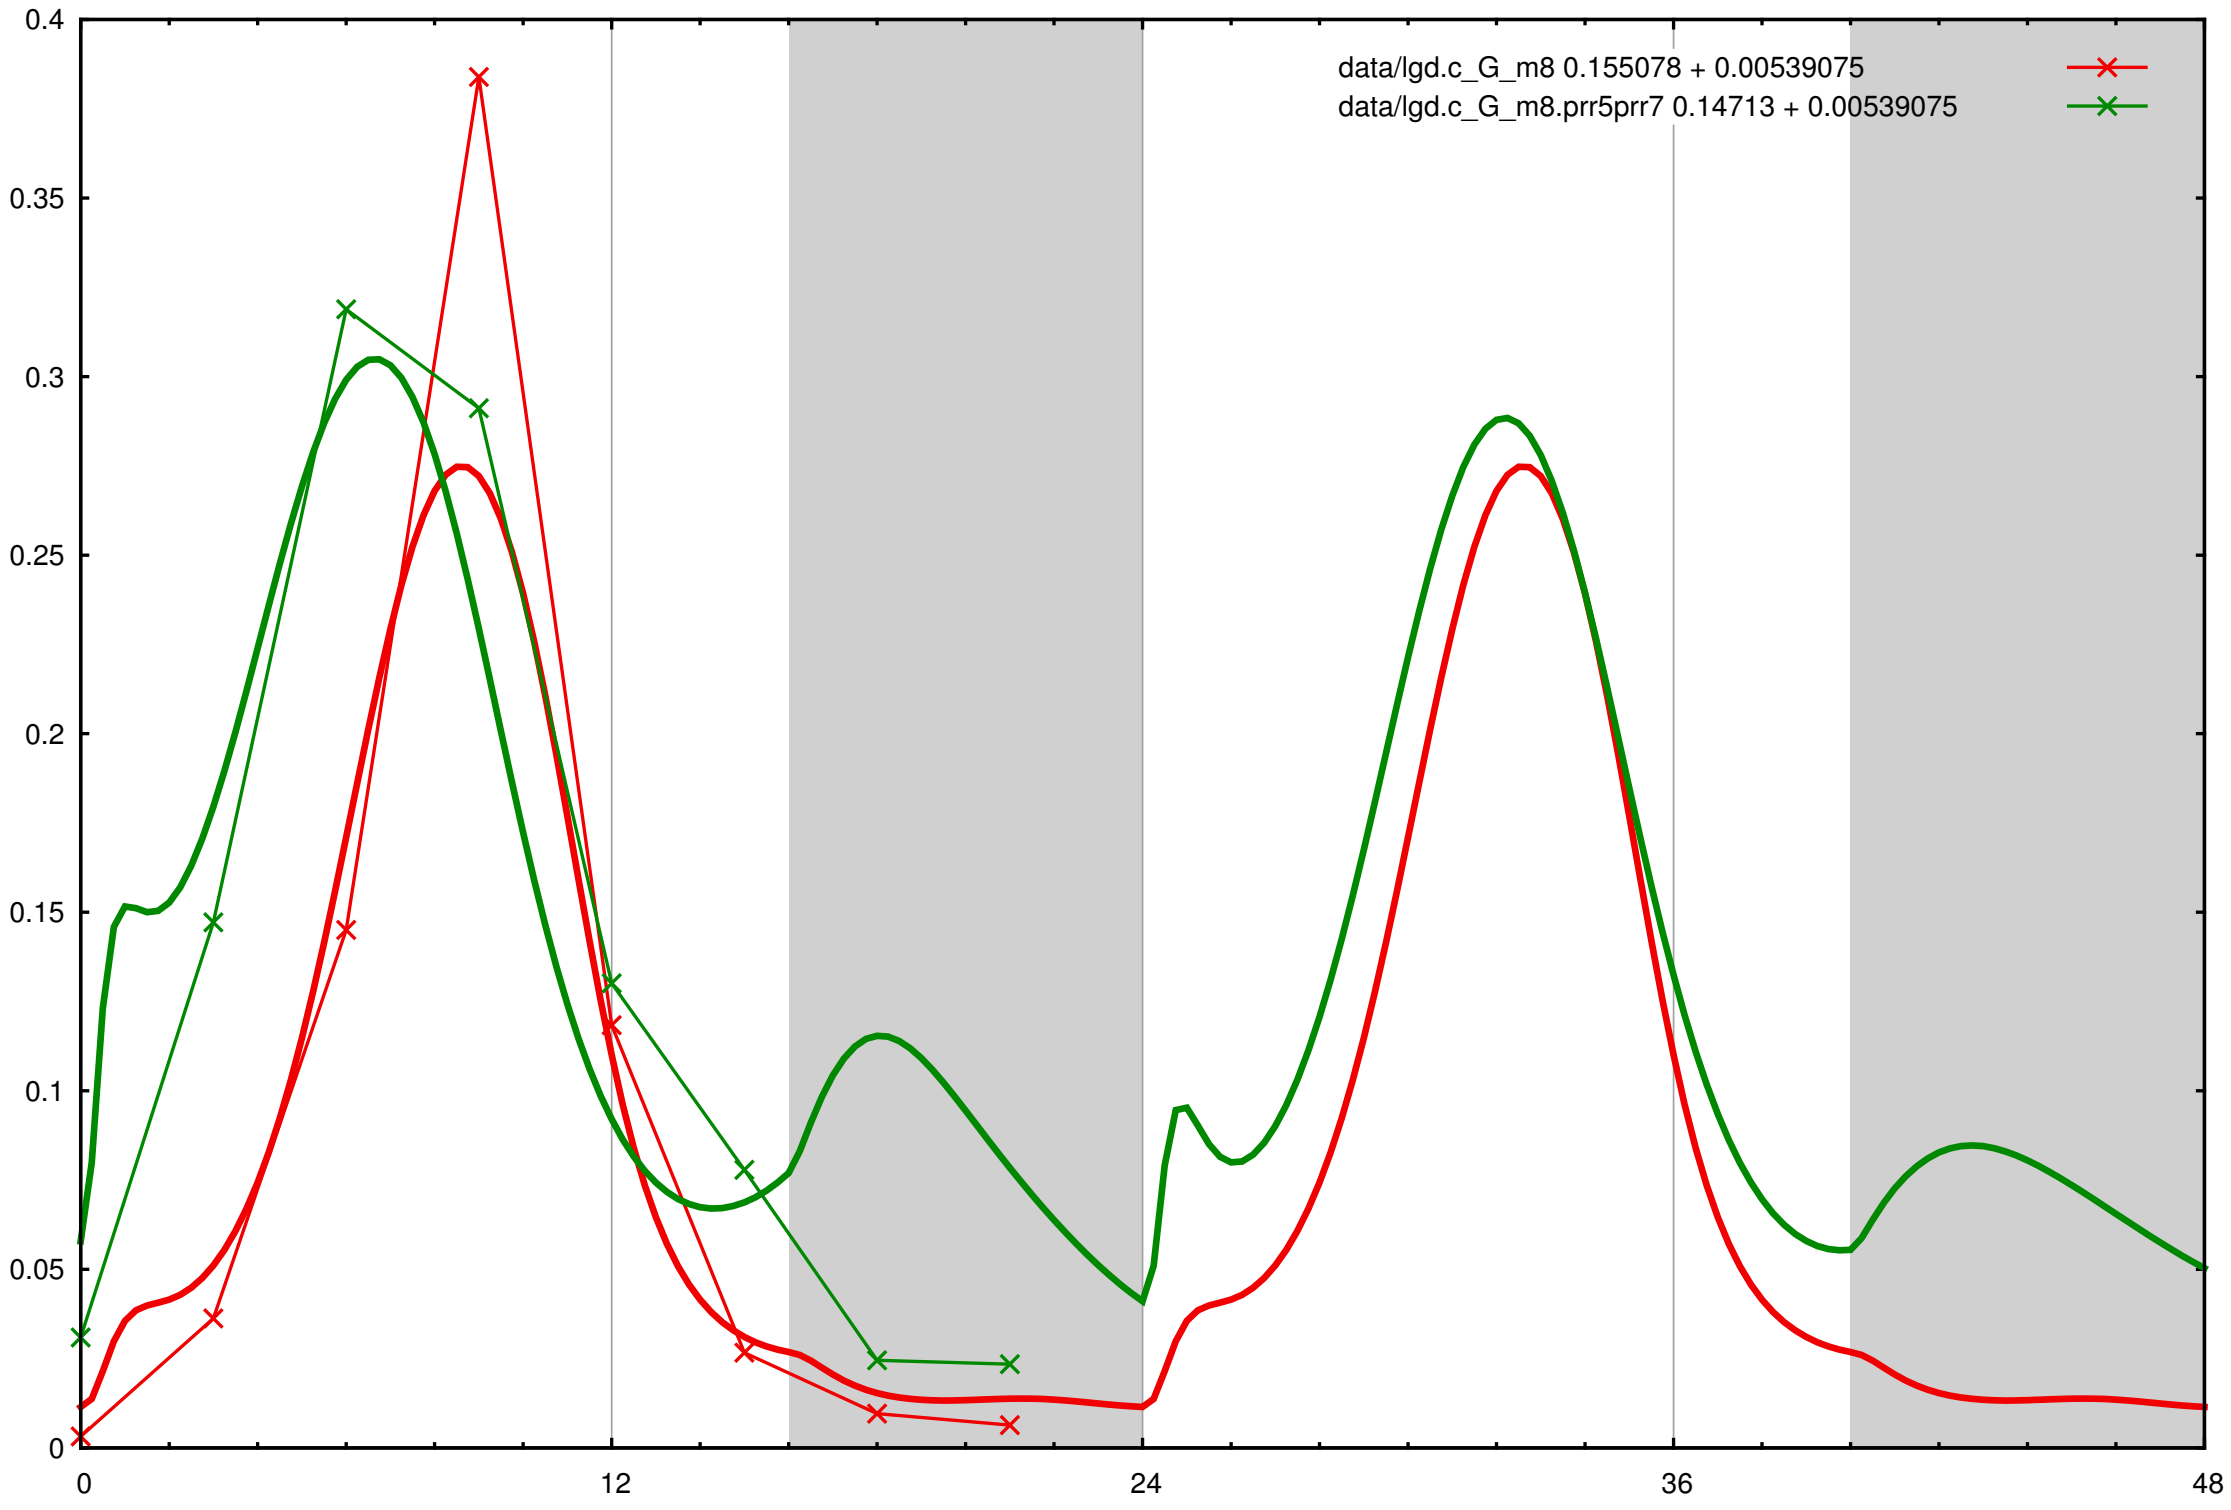



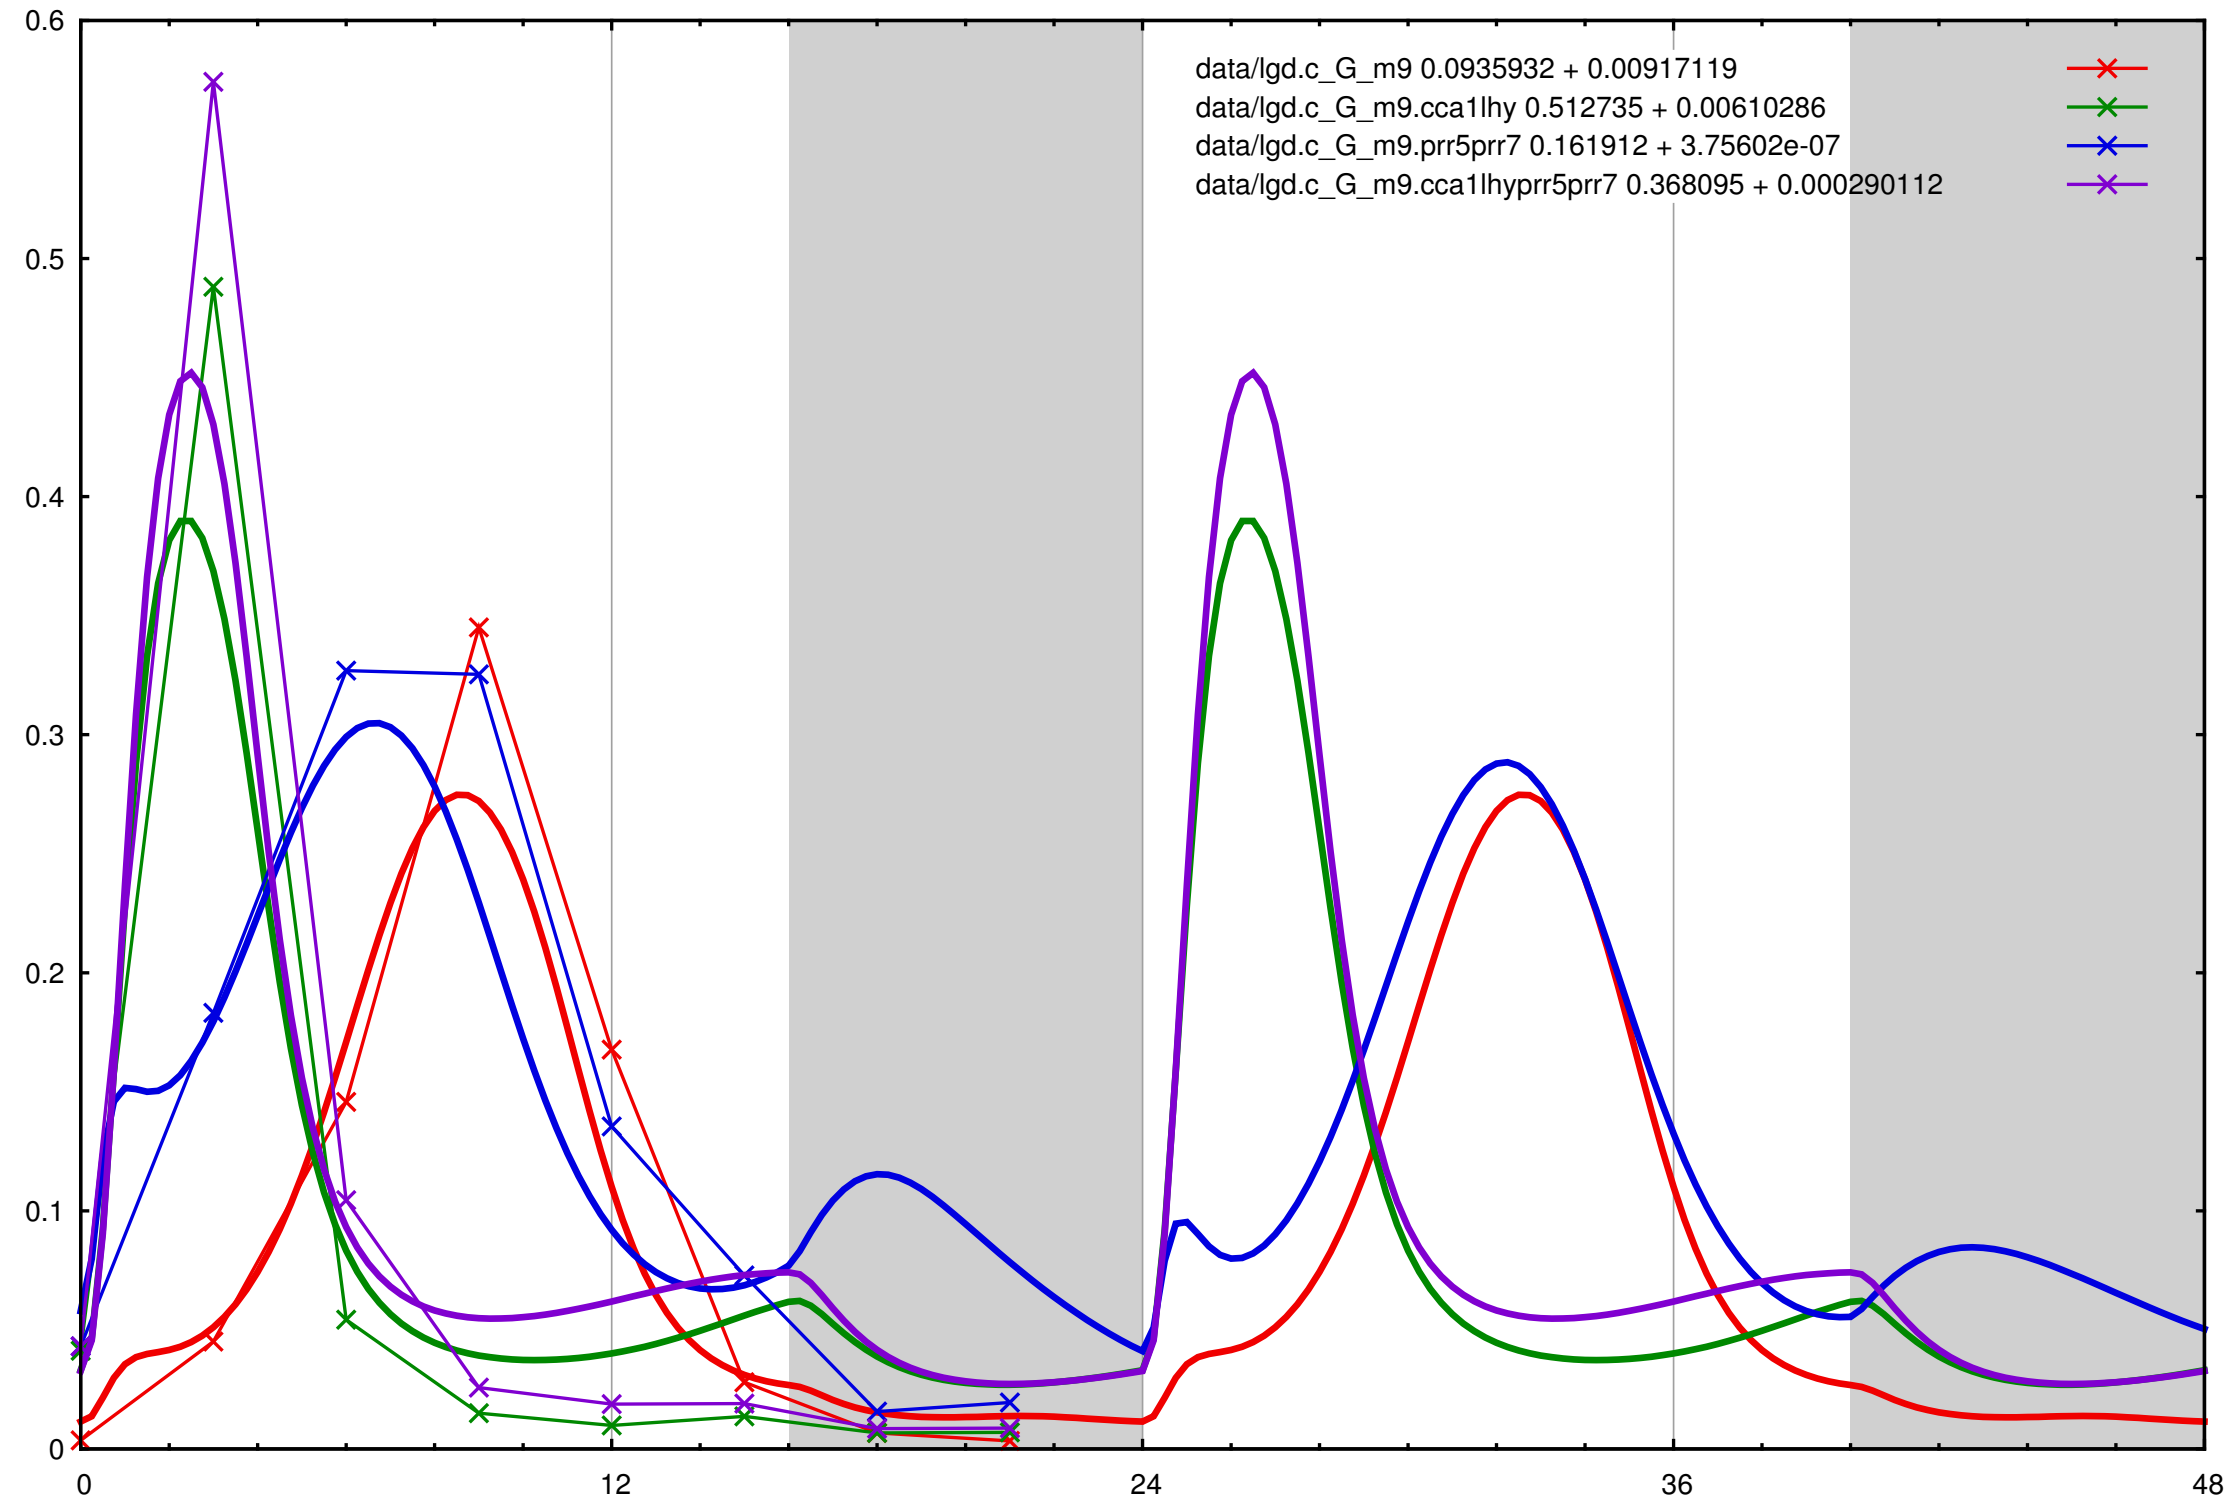

Scale group 202, scost 0.00169269

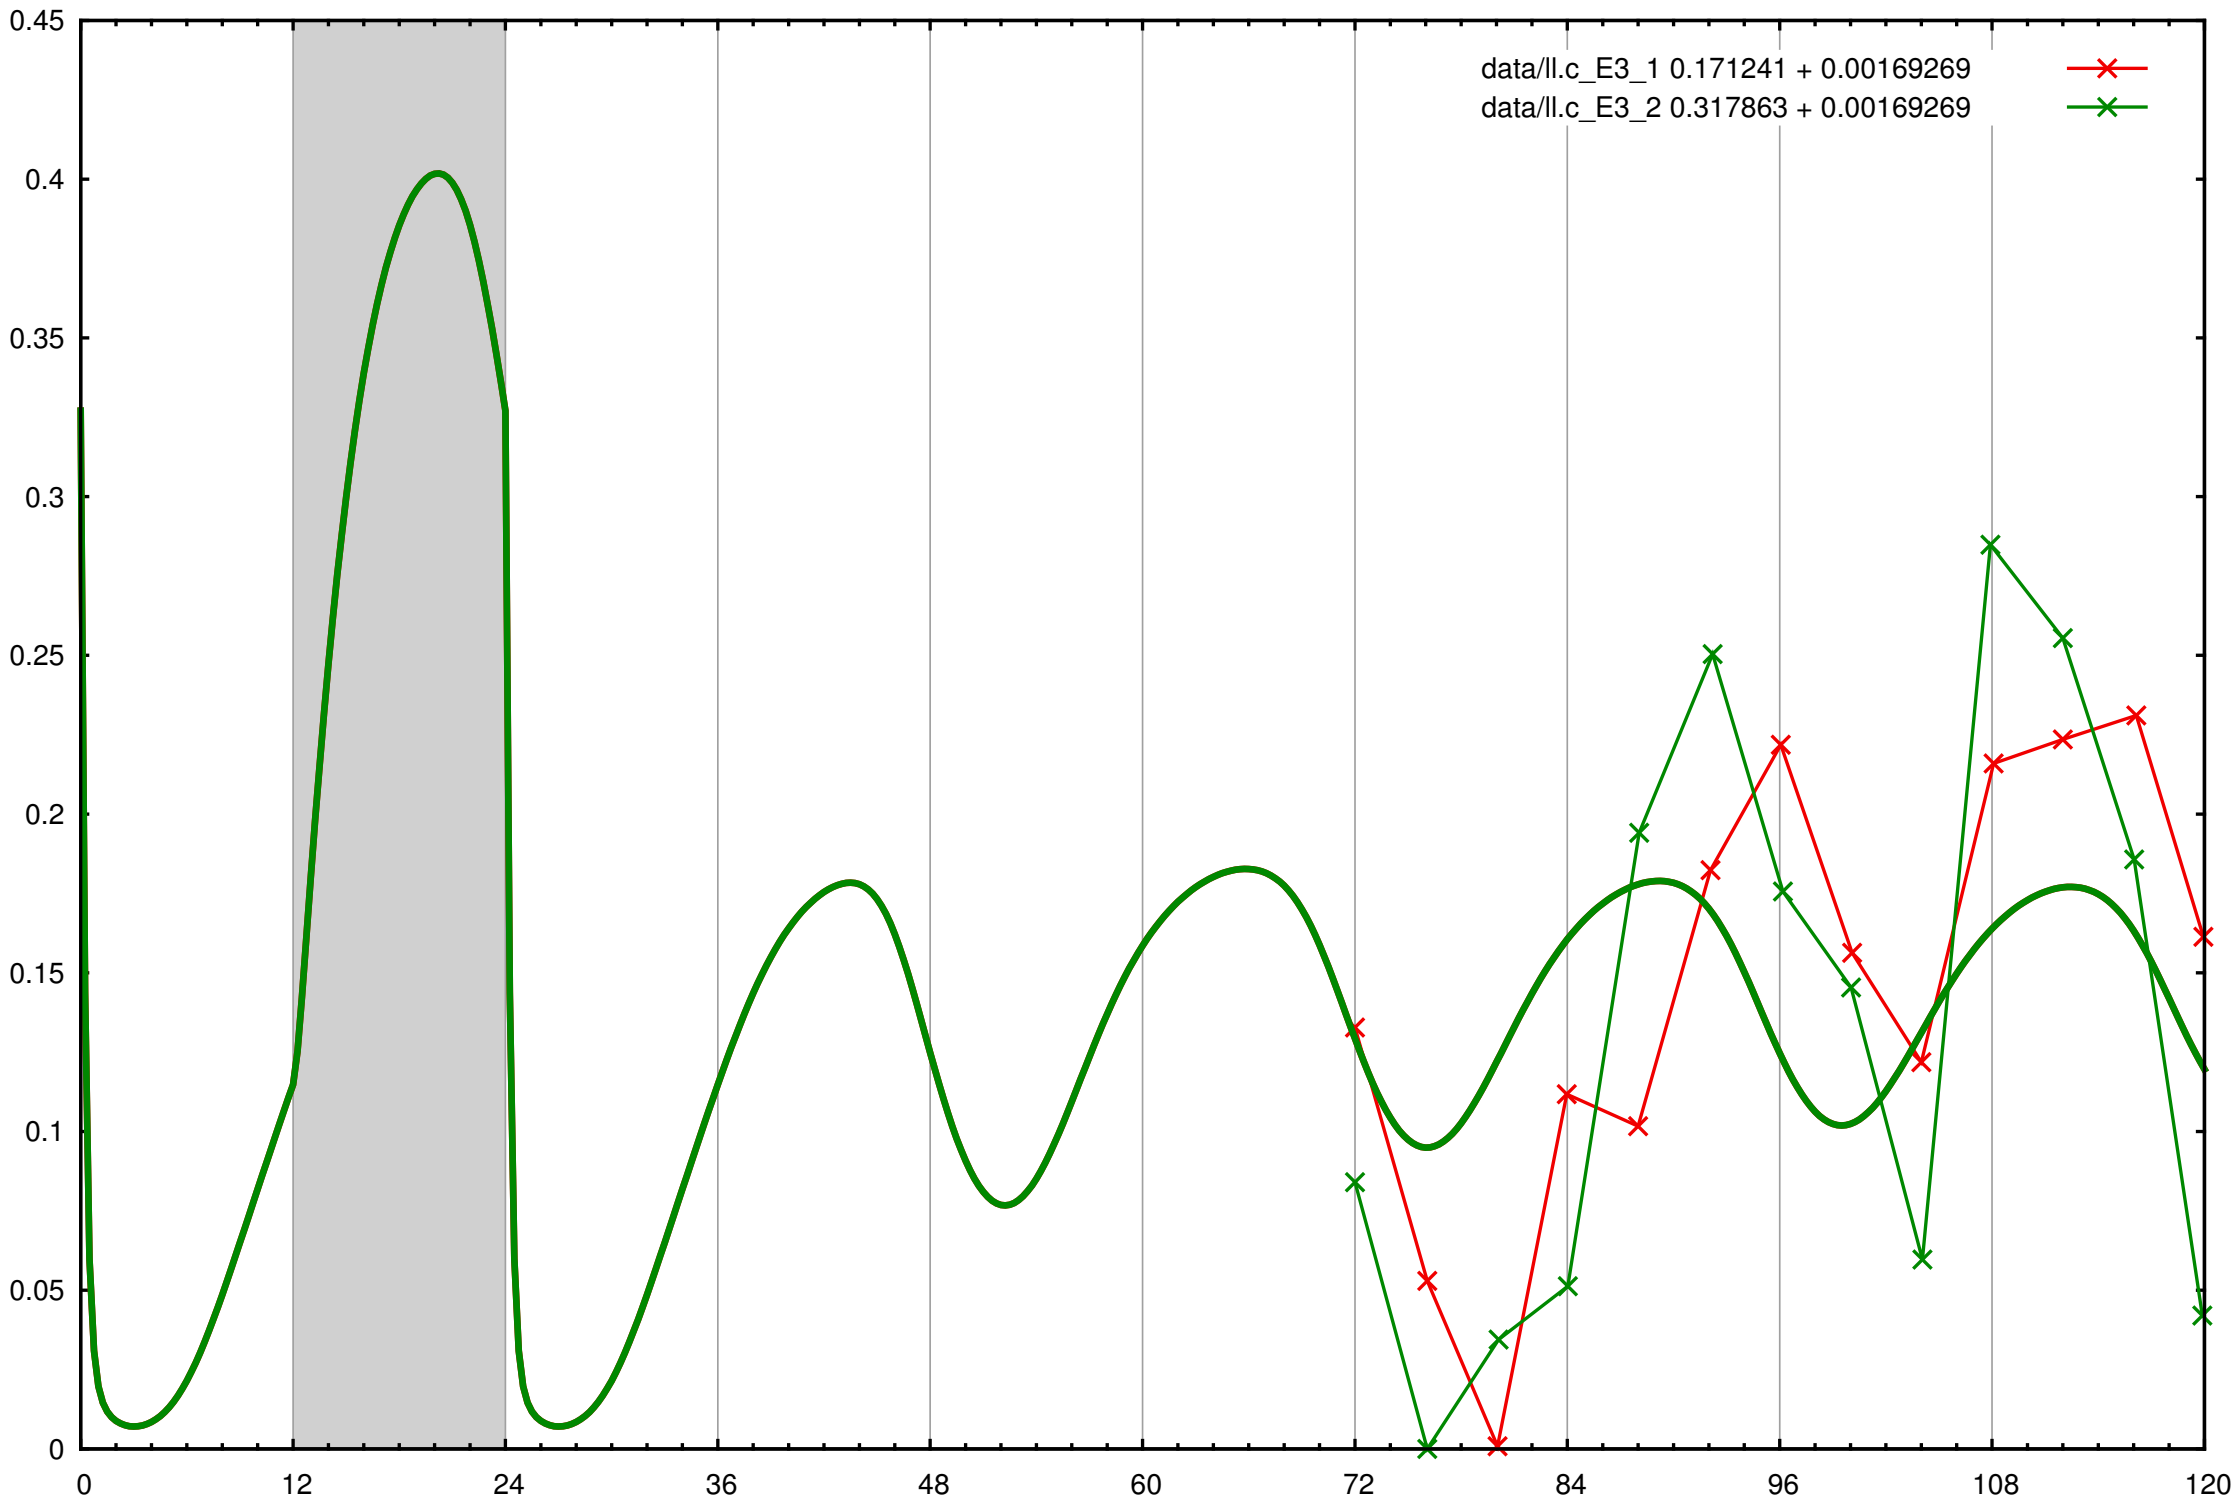

Scale group 203, scost 1.27822

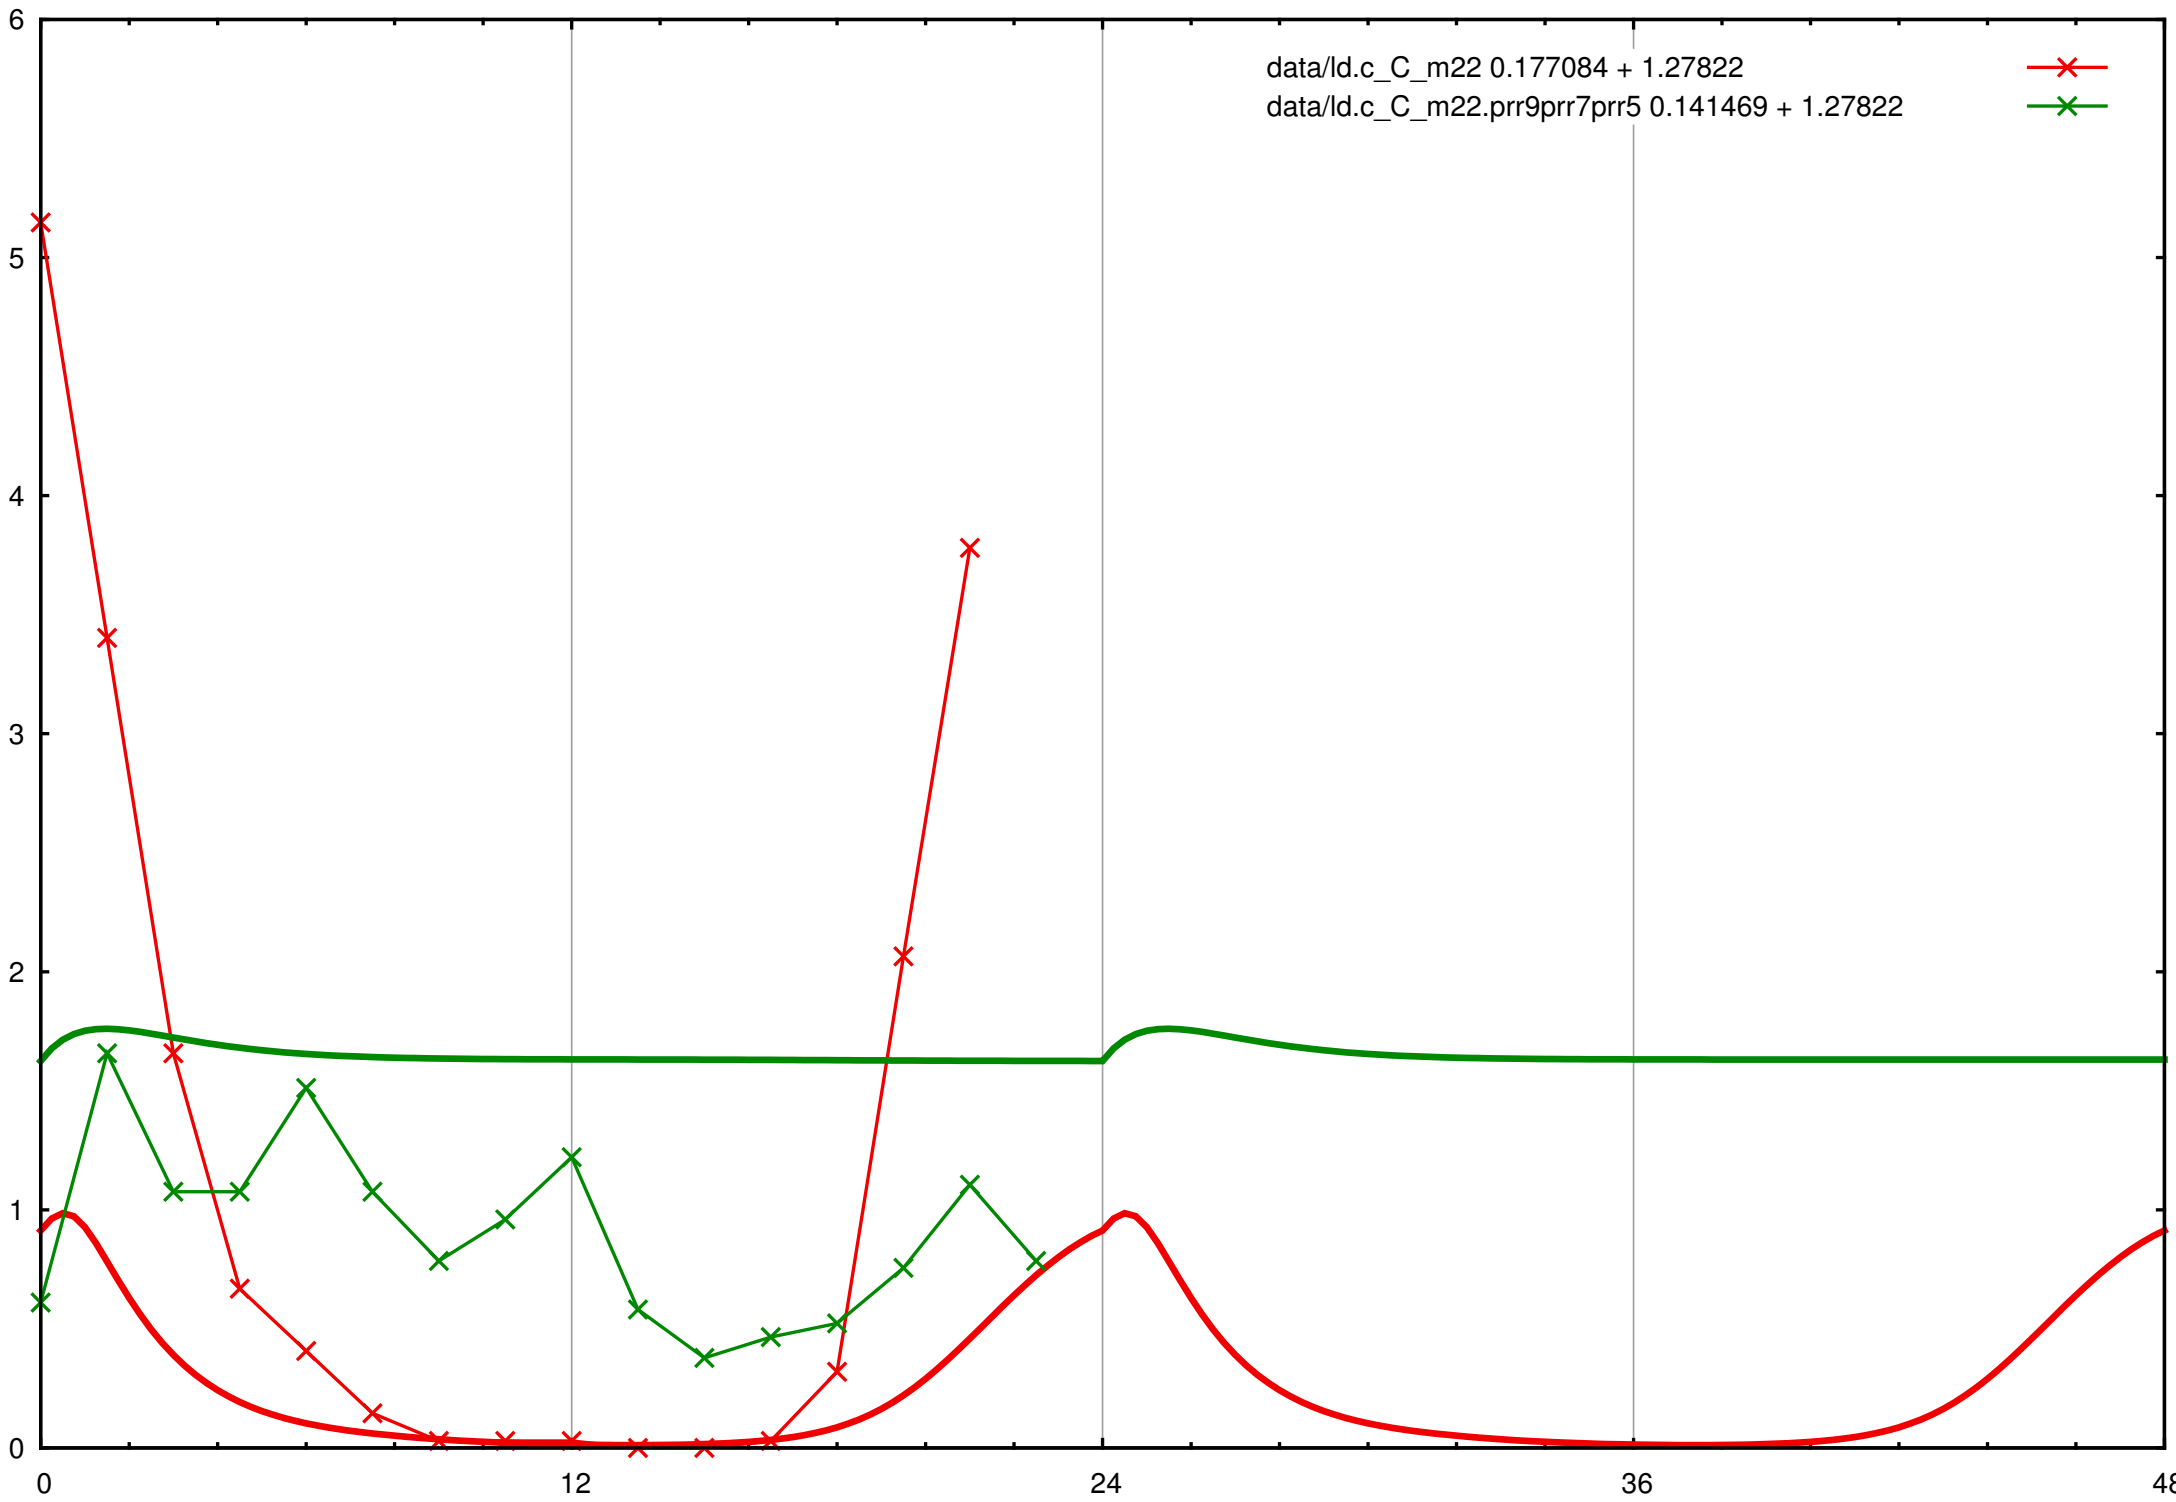

Scale group 204, scost 0.368897

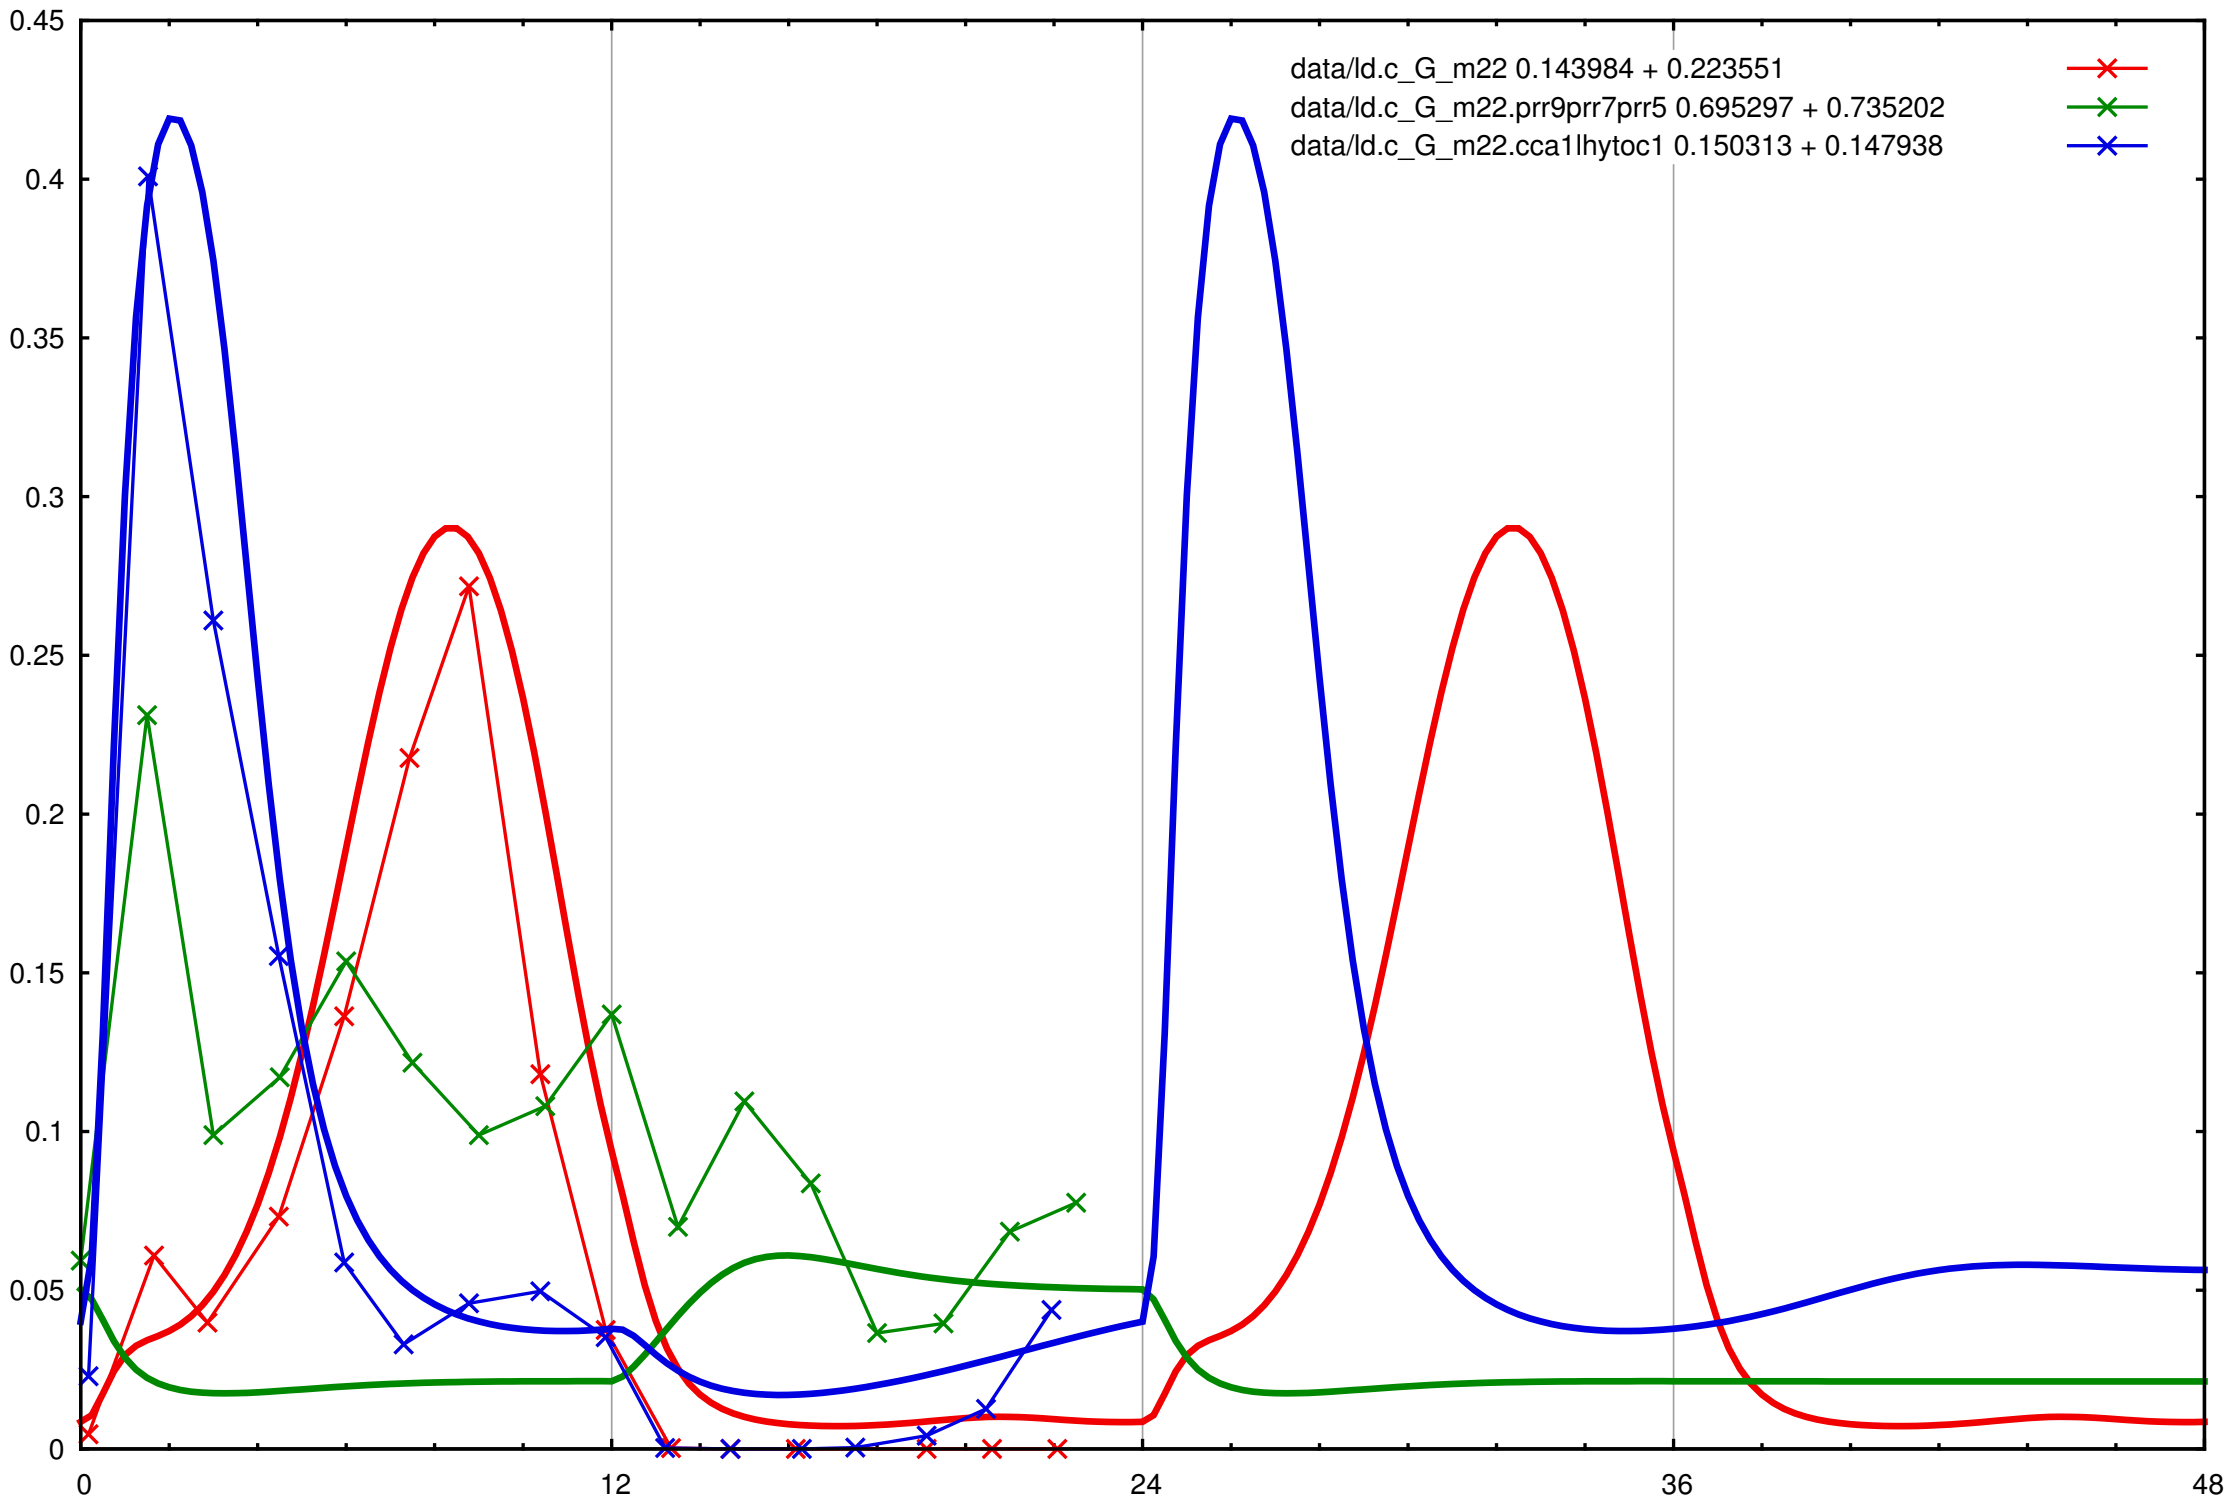

Scale group 205, scost 0.597055

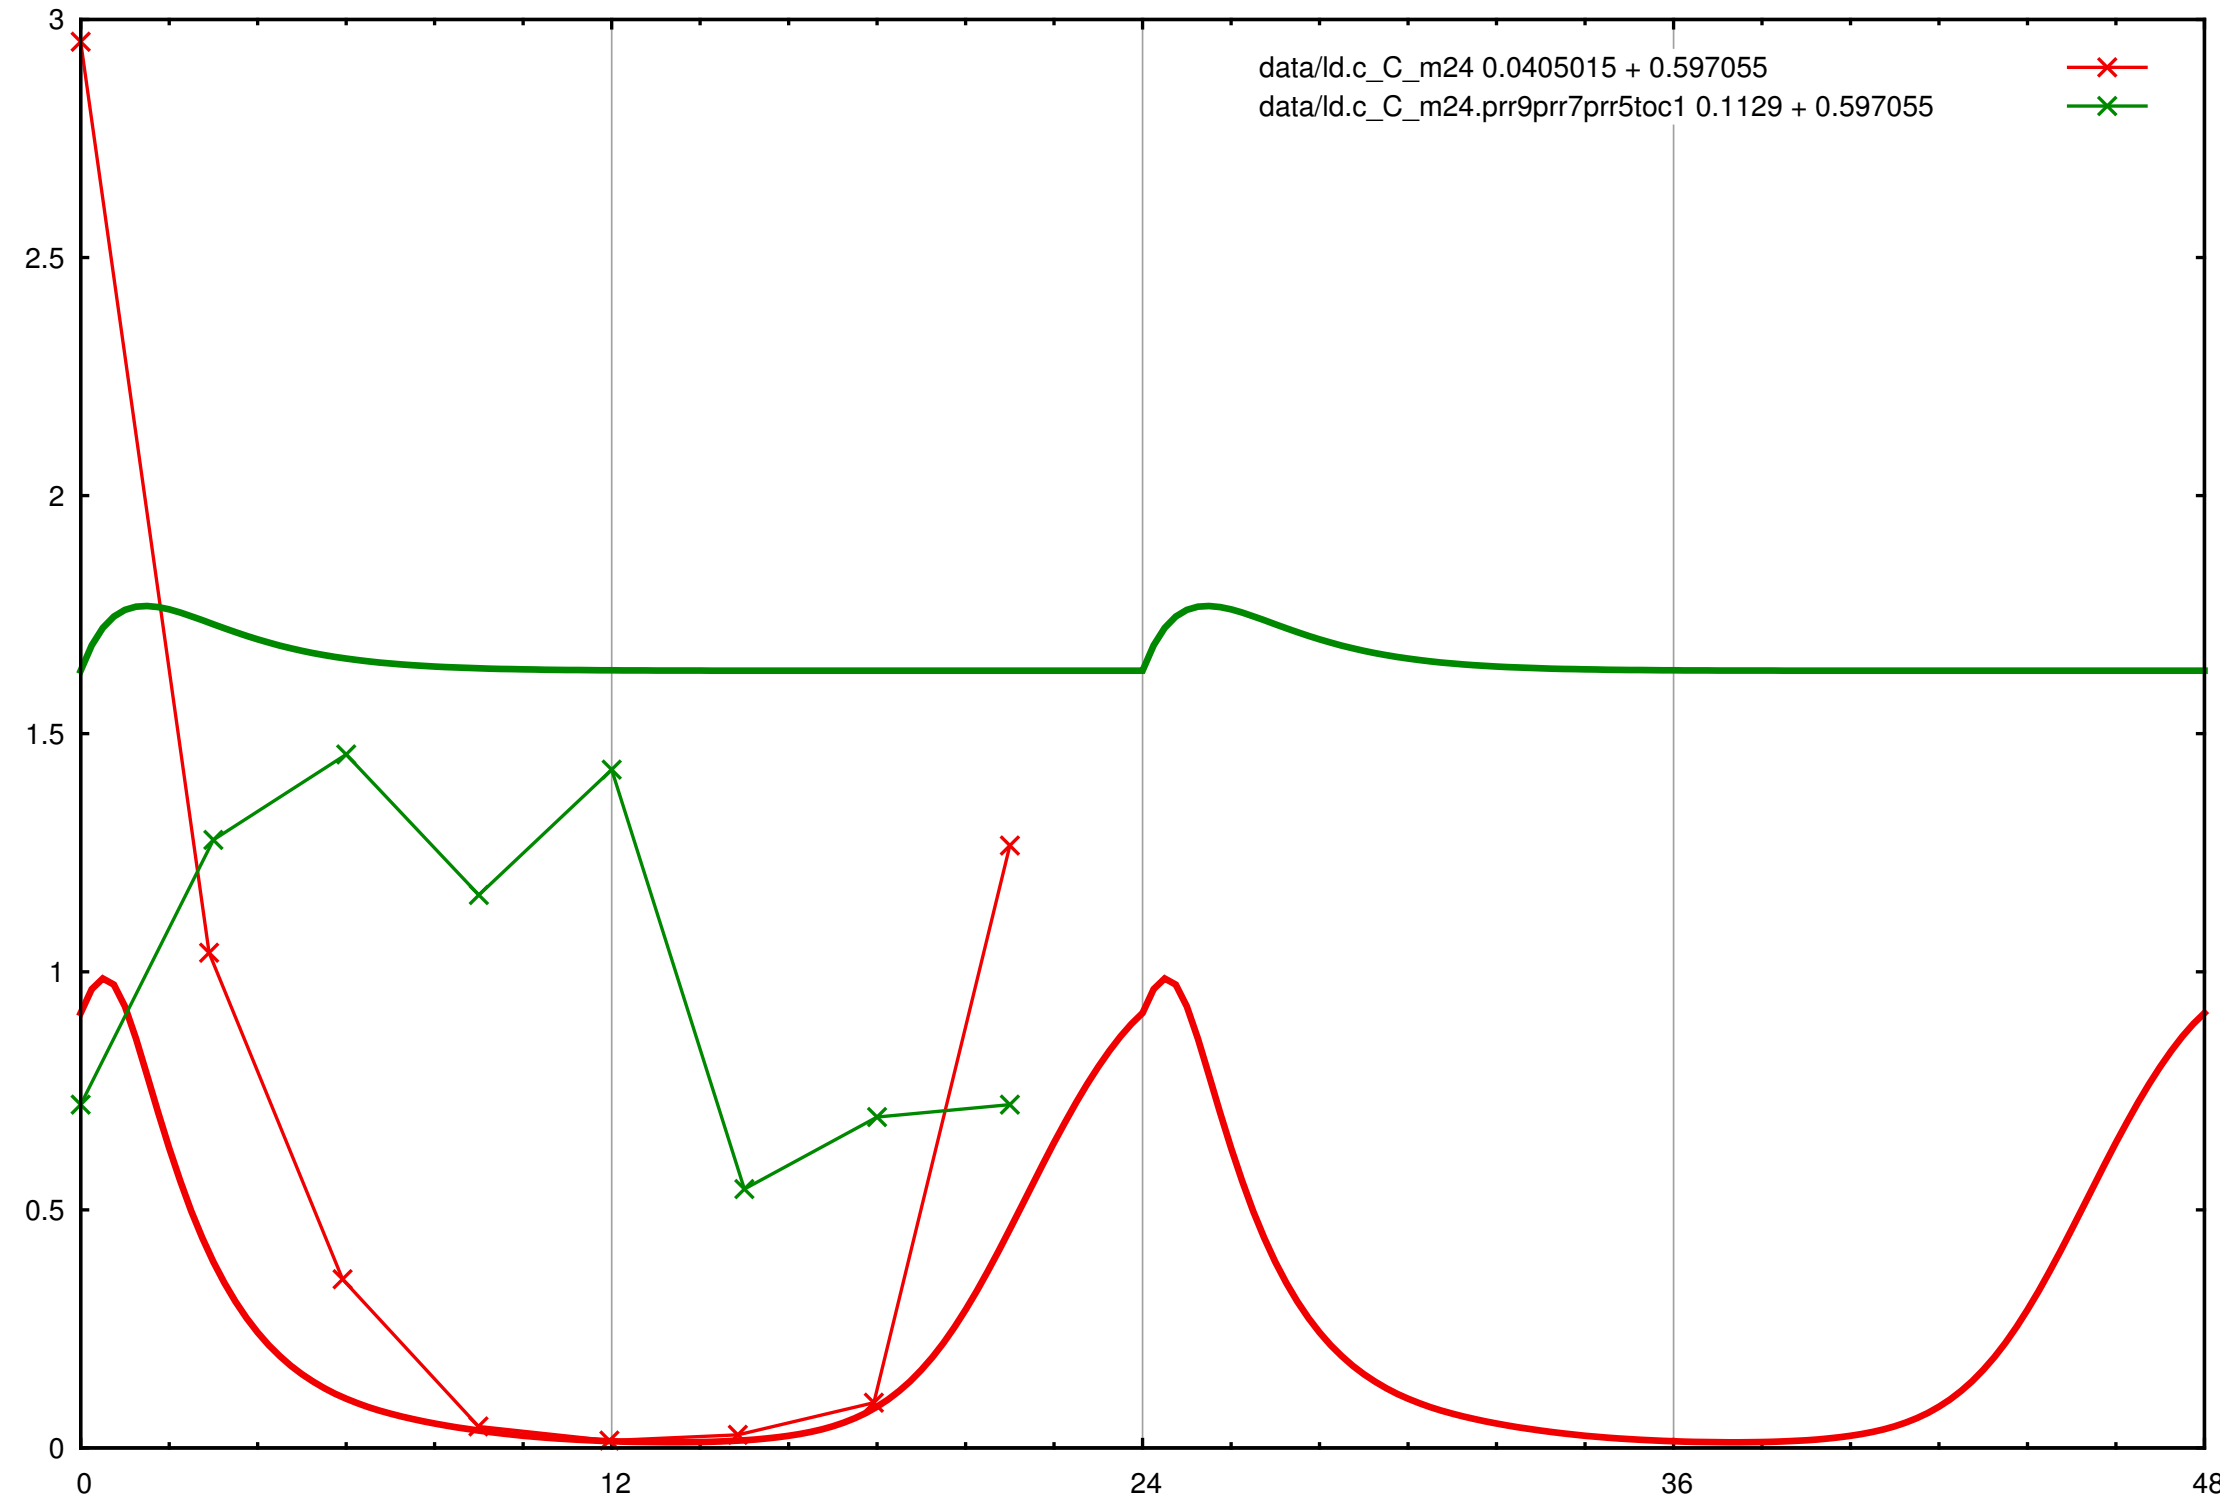

Scale group 206, scost 0.4914

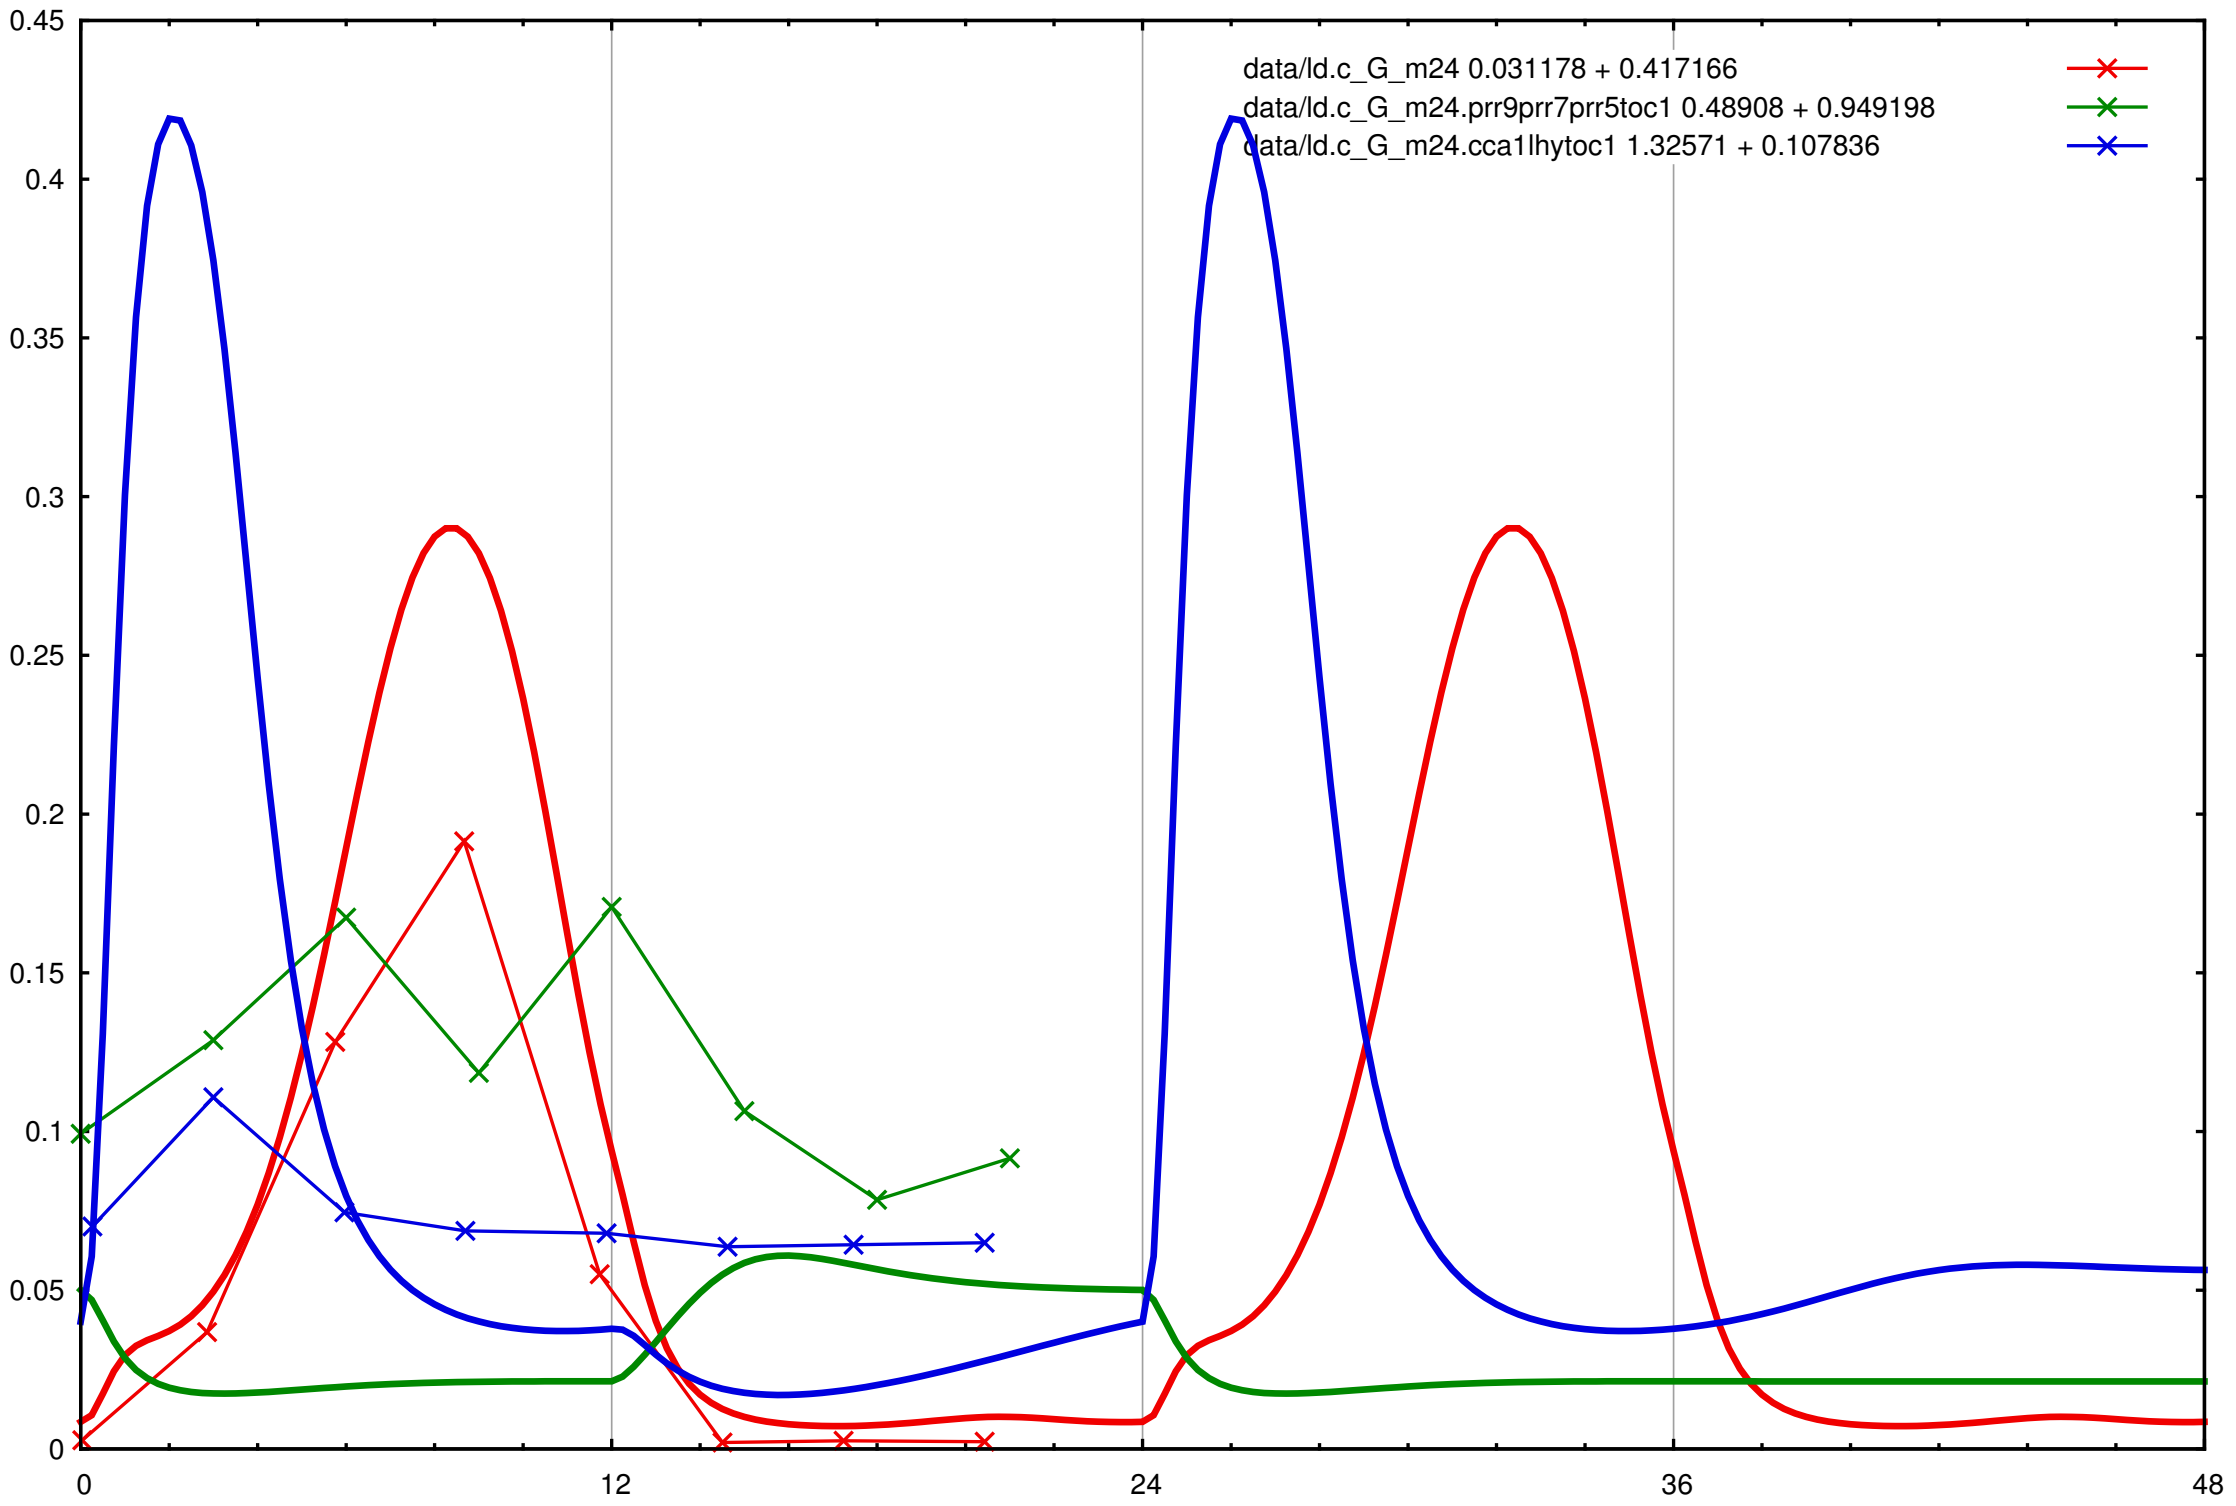

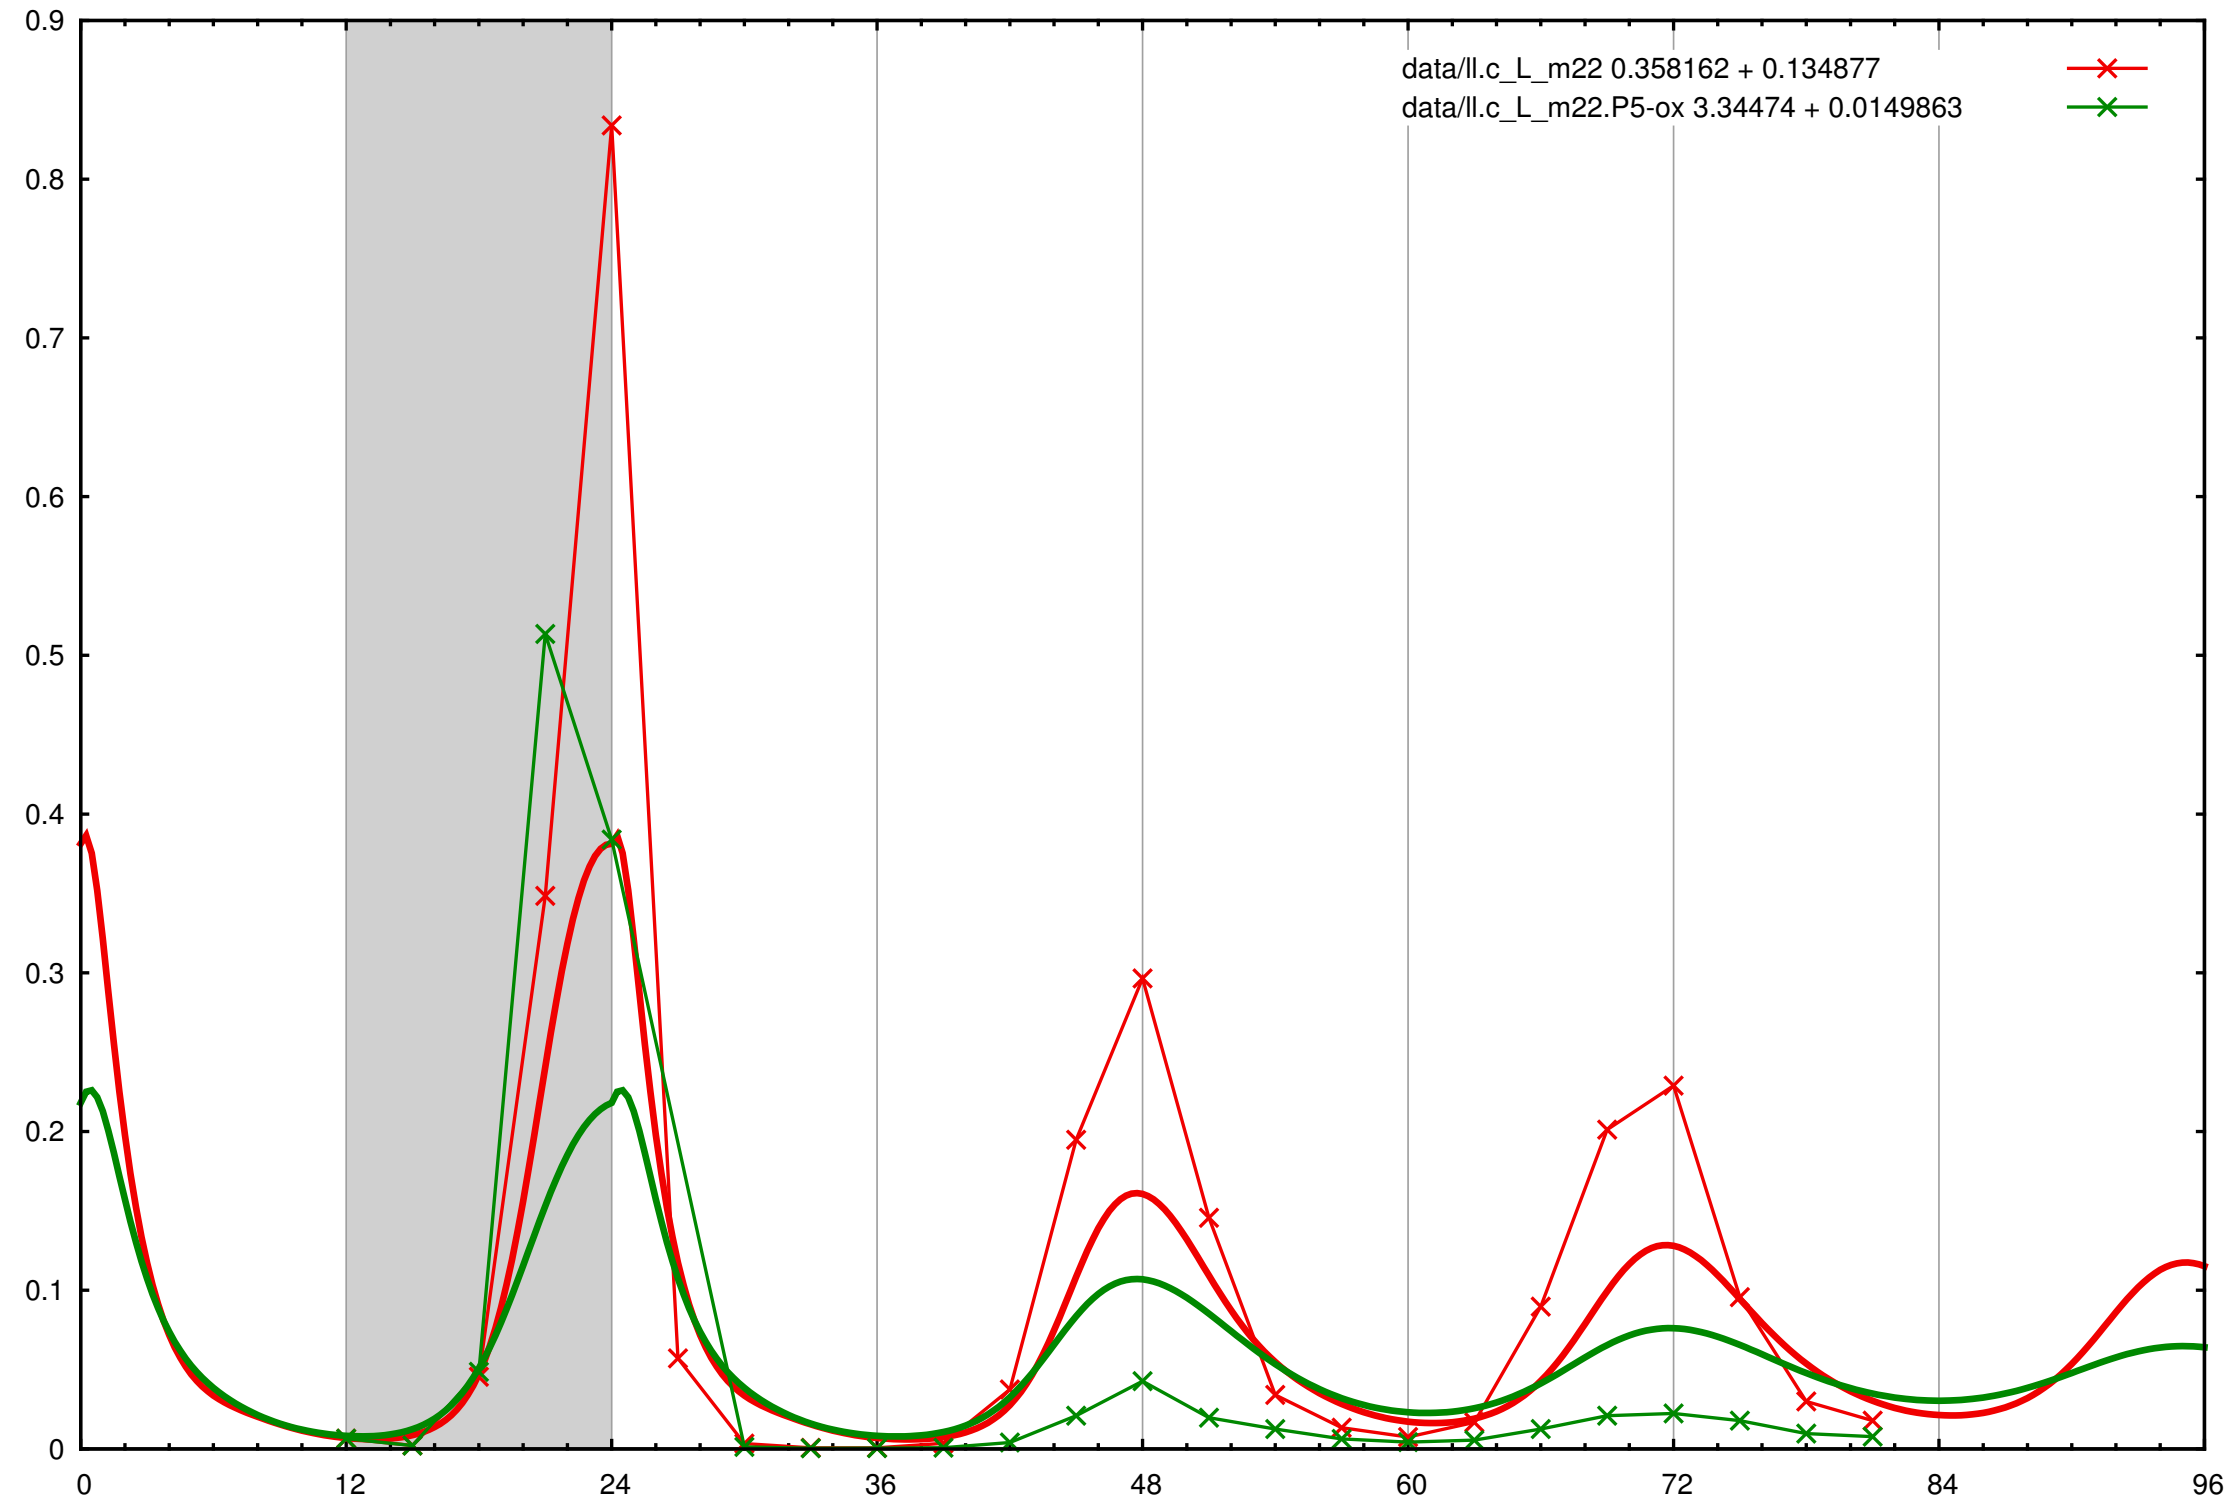

Scale group 208, scost 0

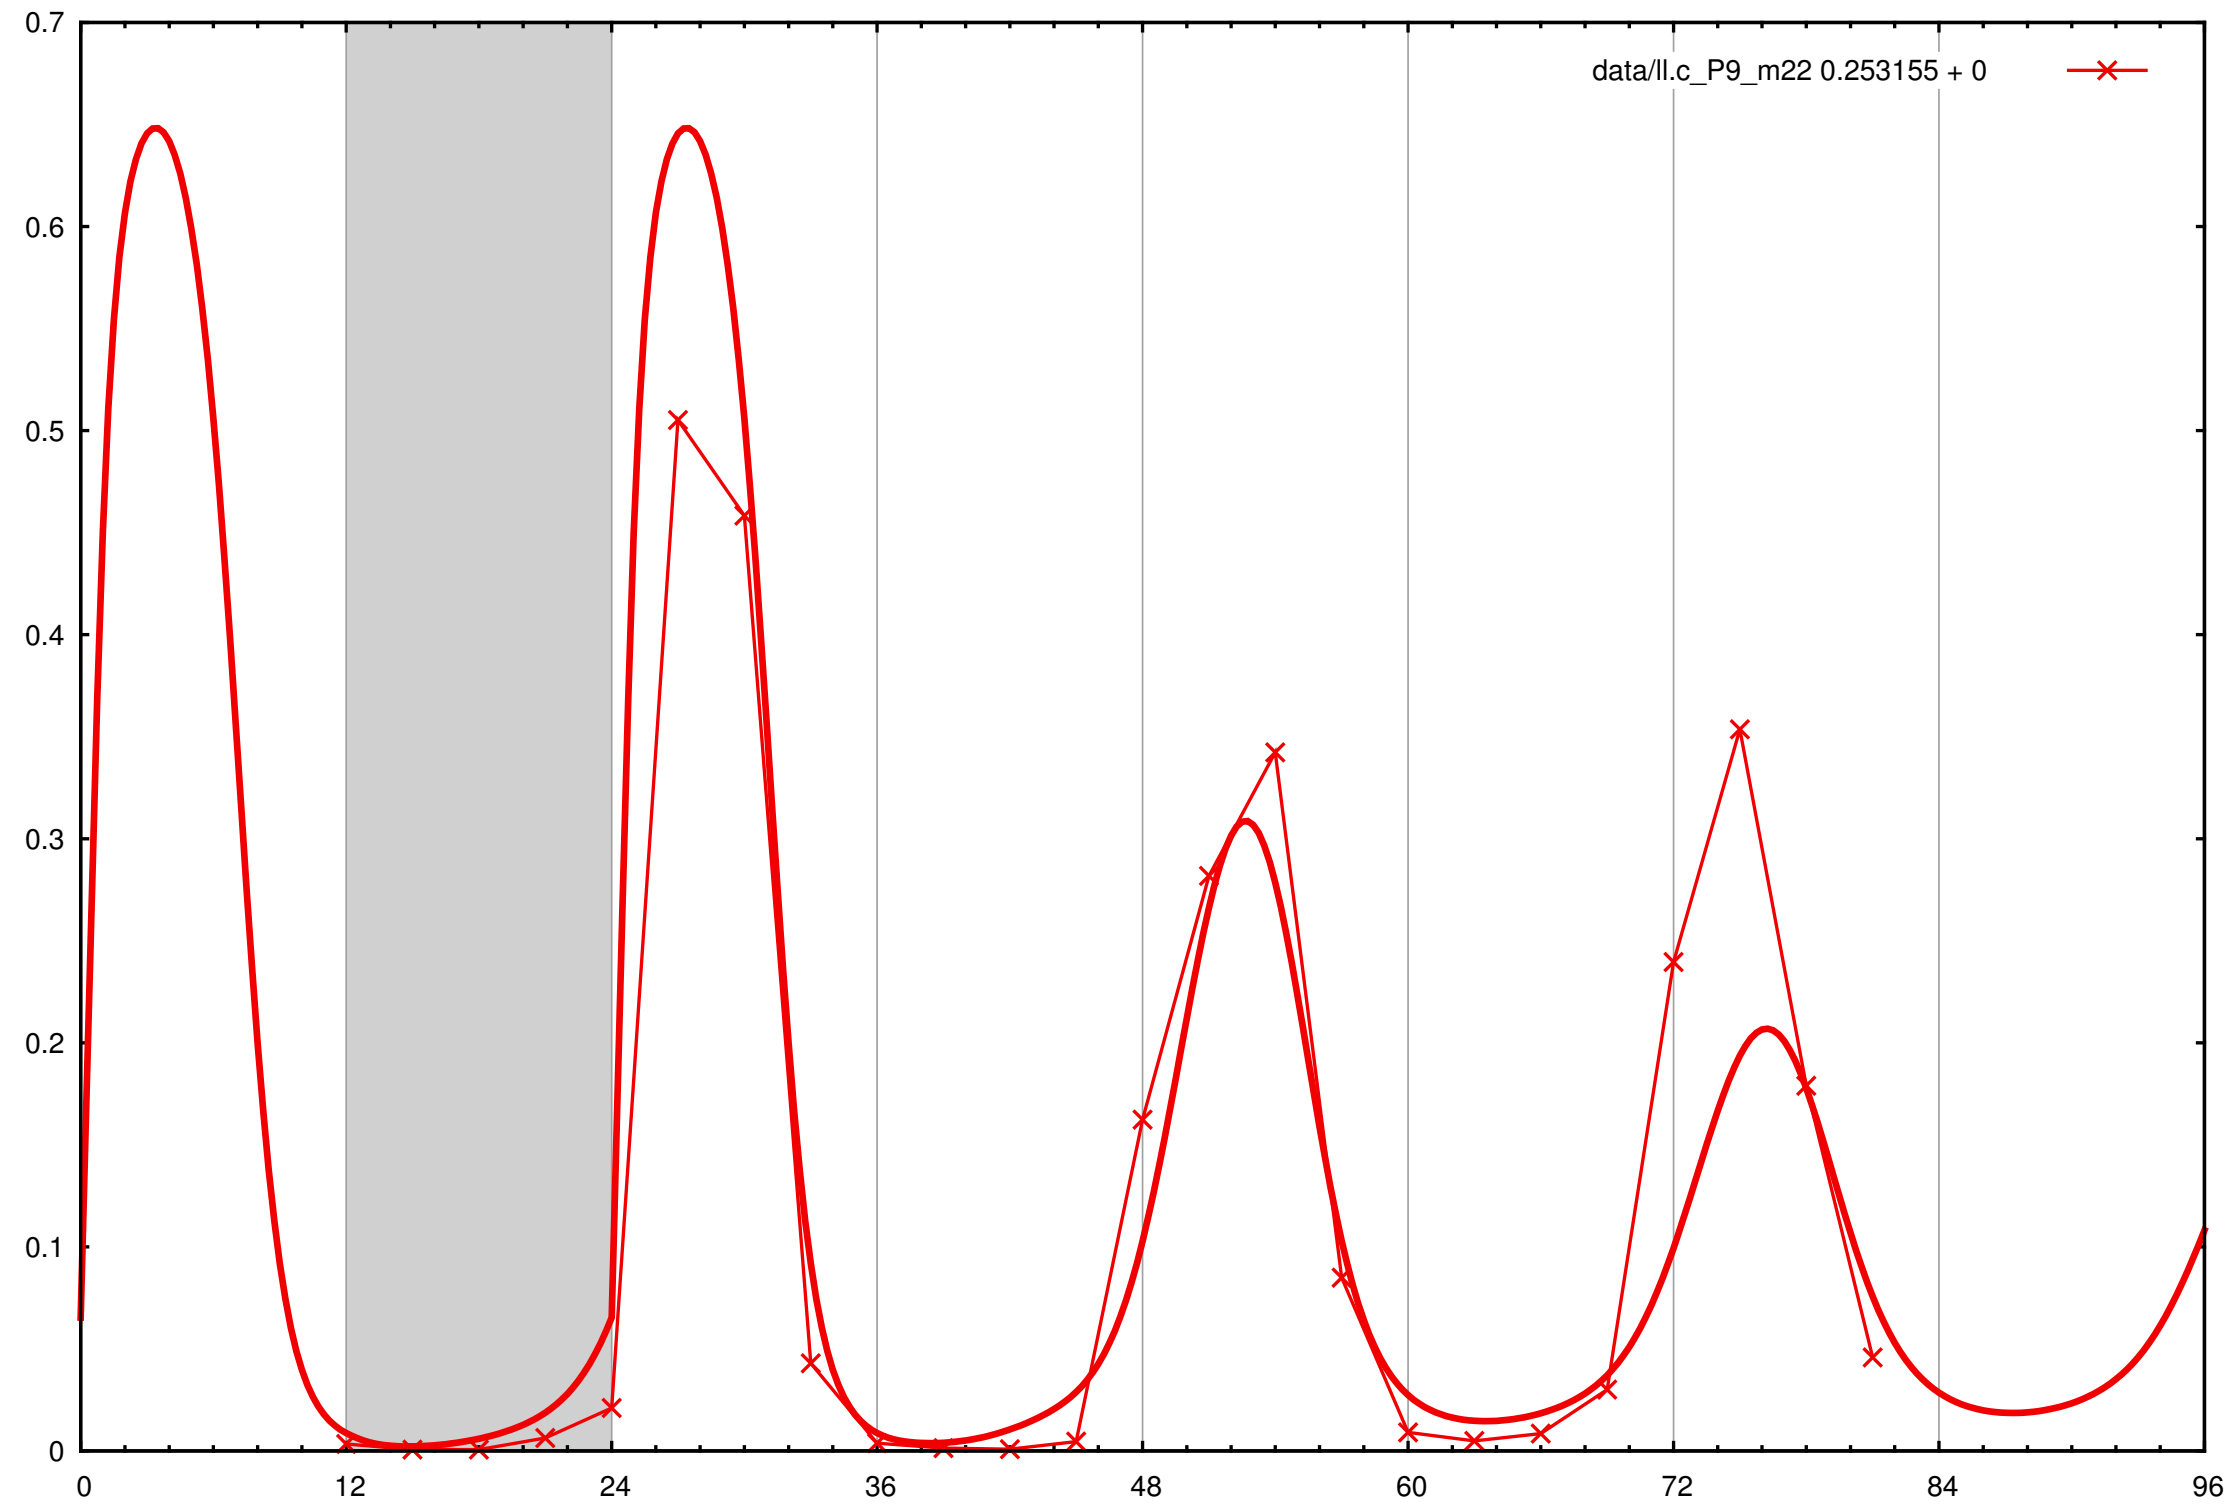



Scale group 209, scost 0

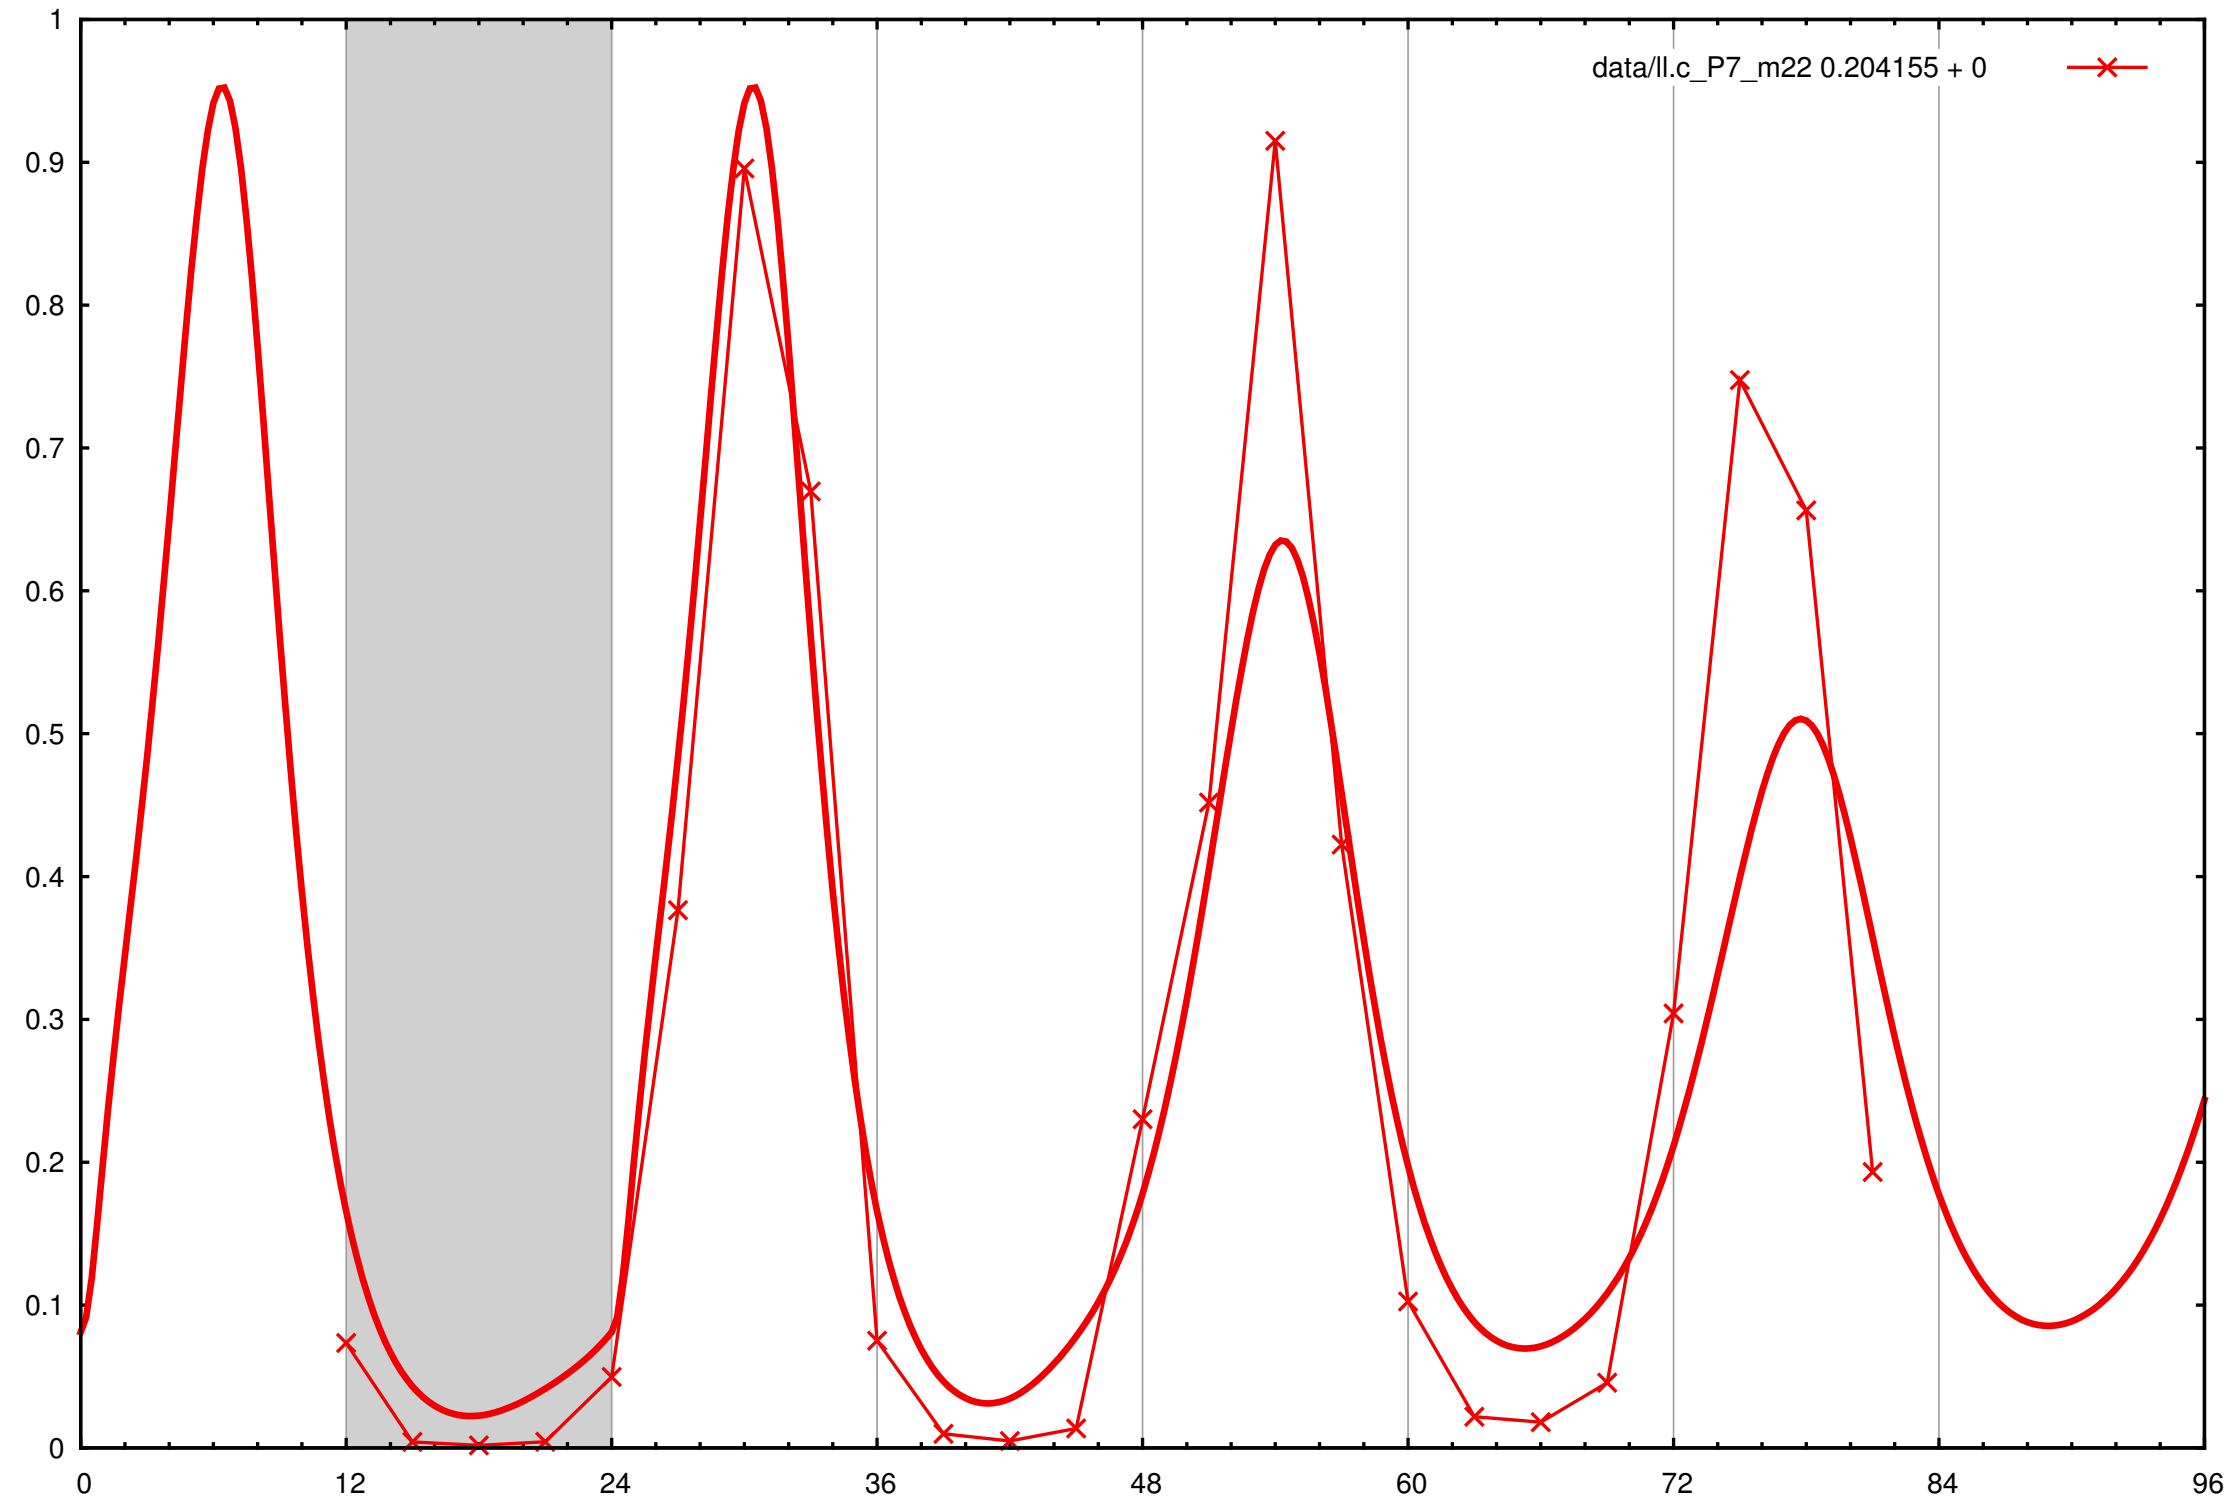

Scale group 210, scost 0.00675346

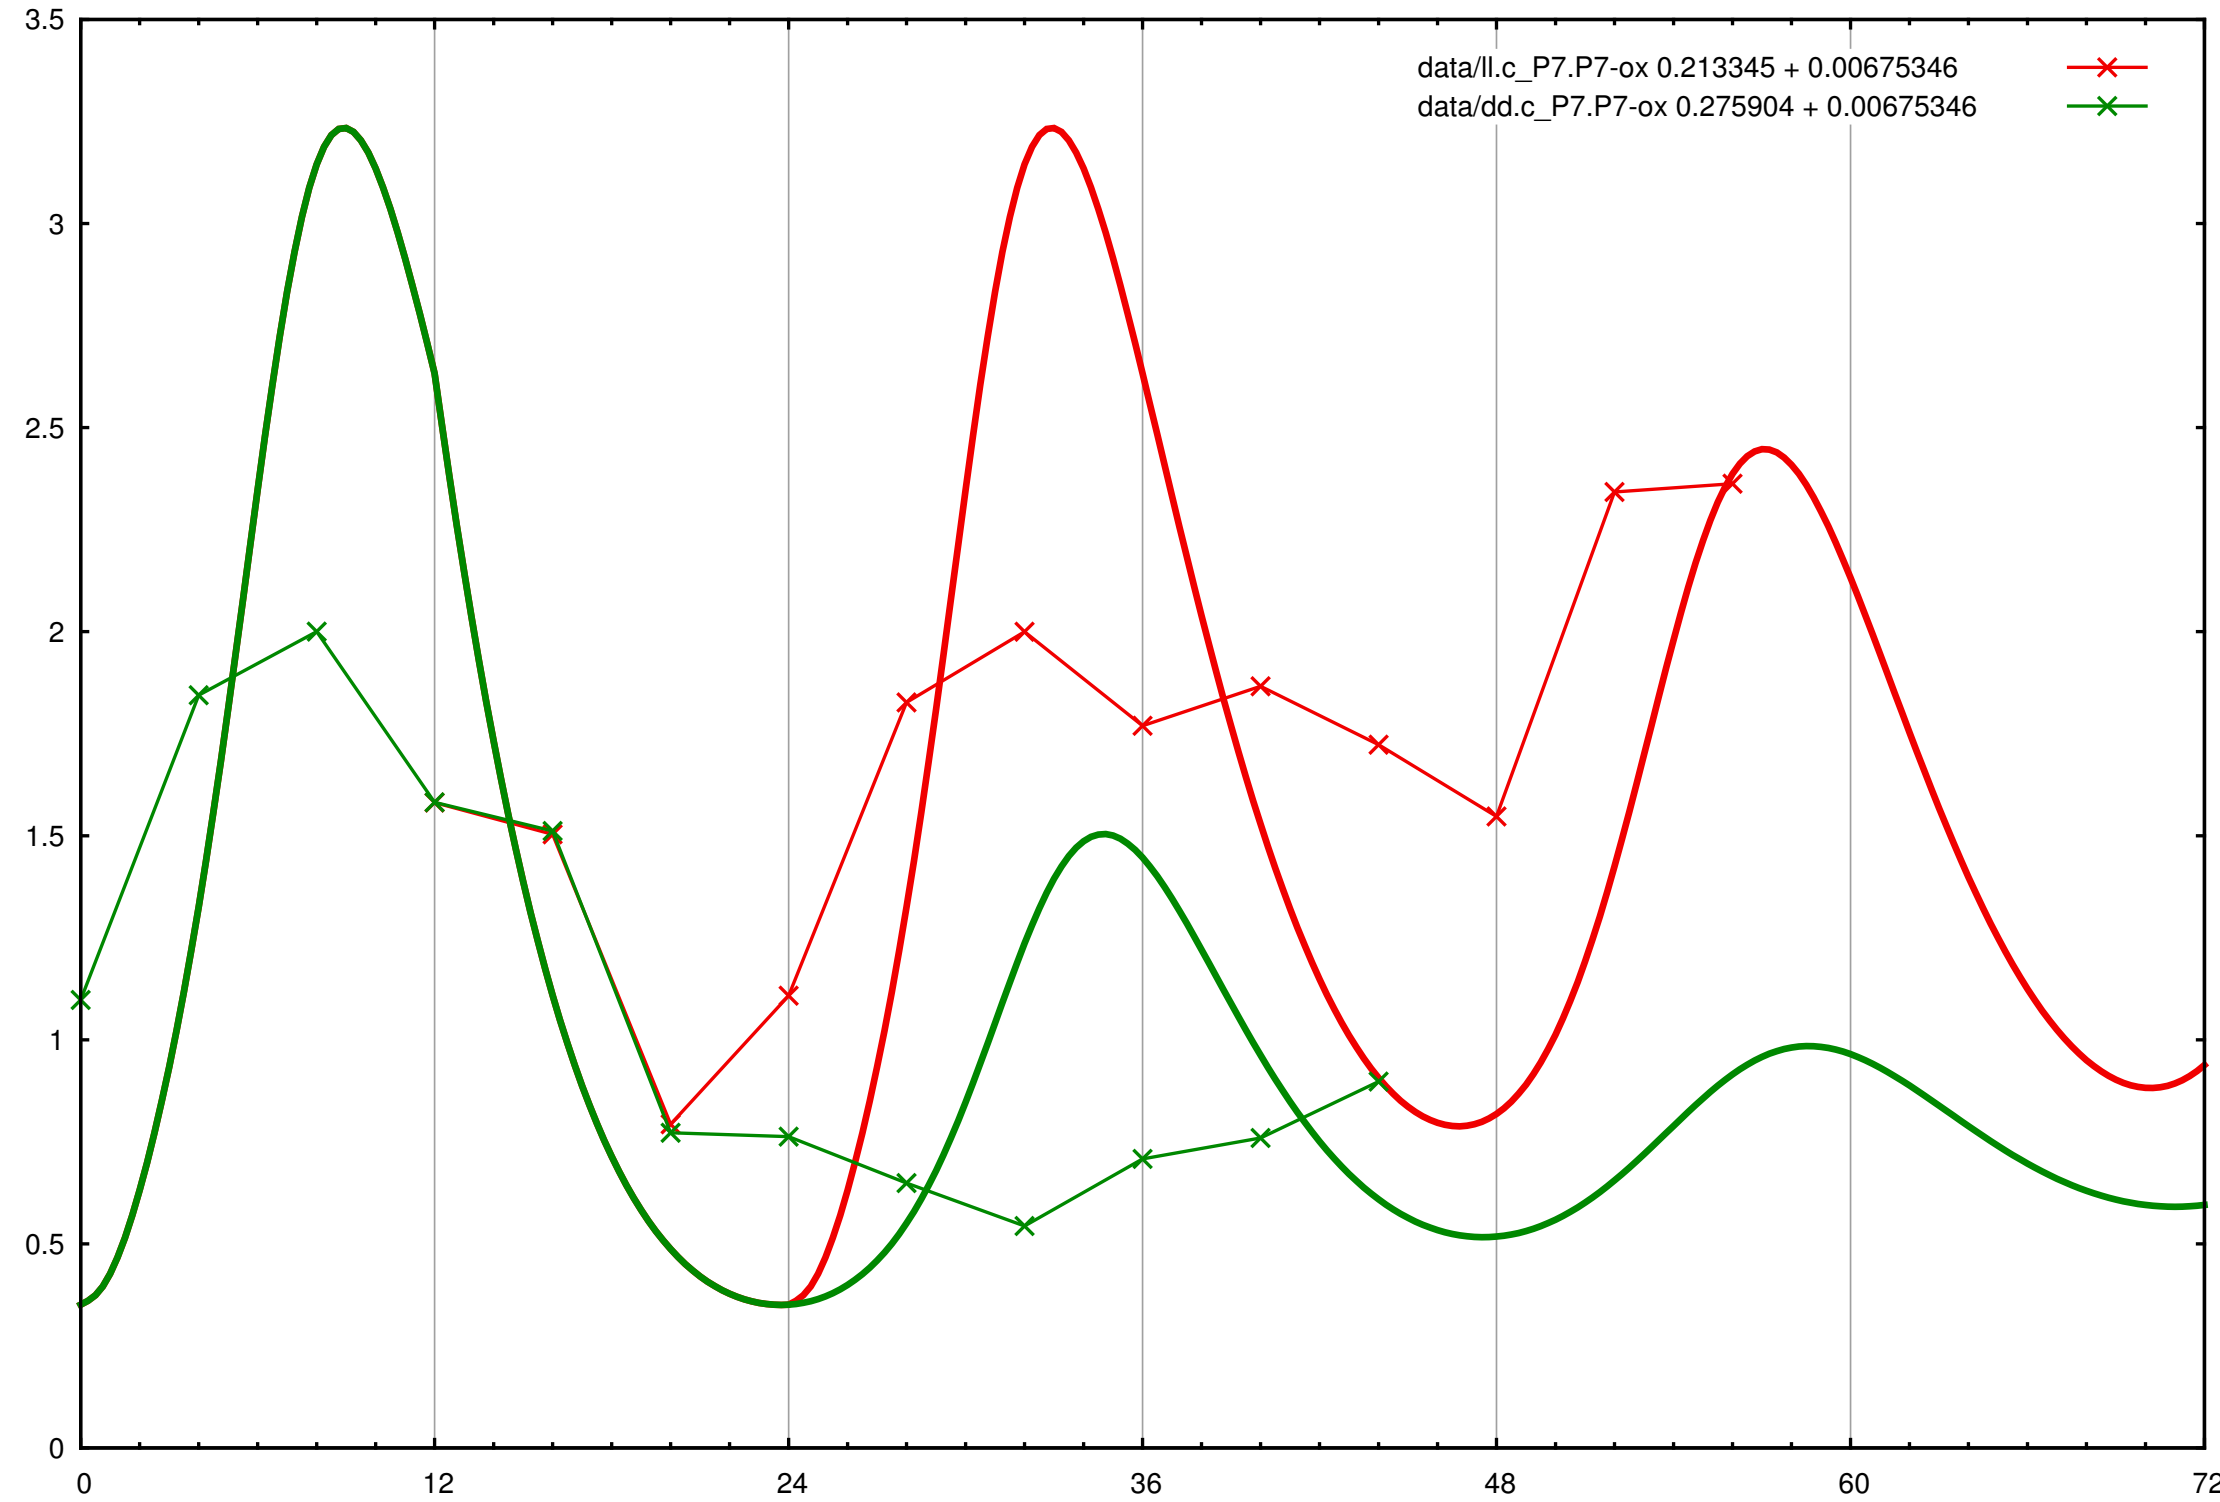

Scale group 211, scost 0.0186074

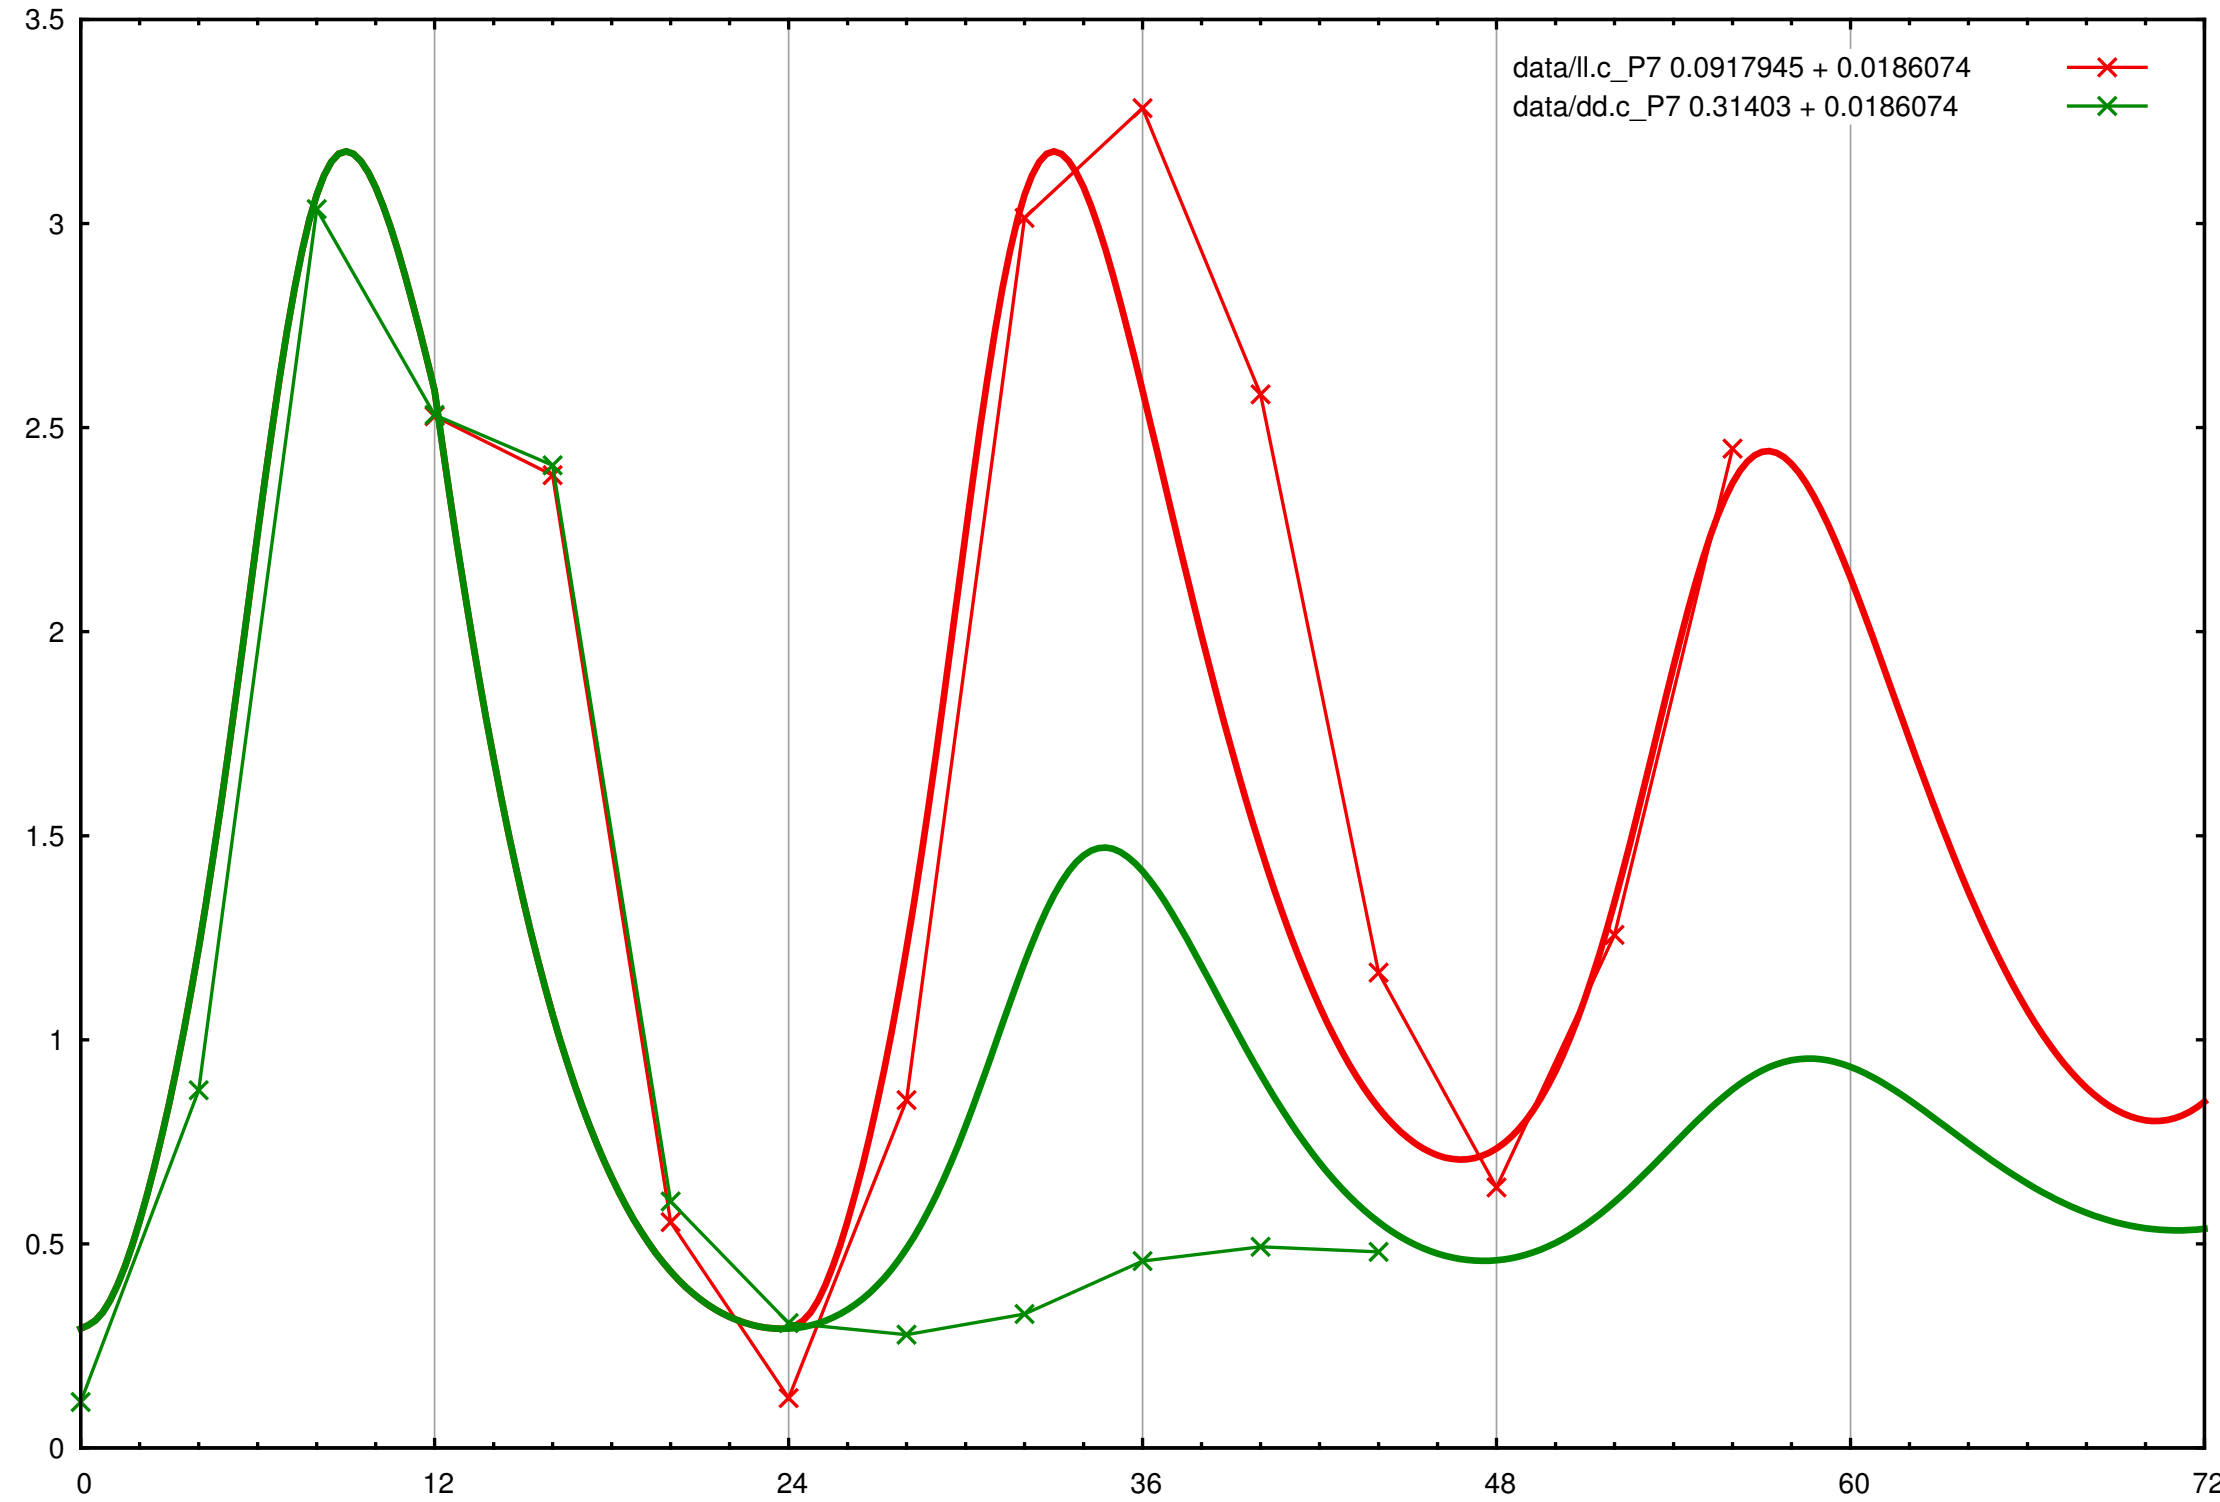

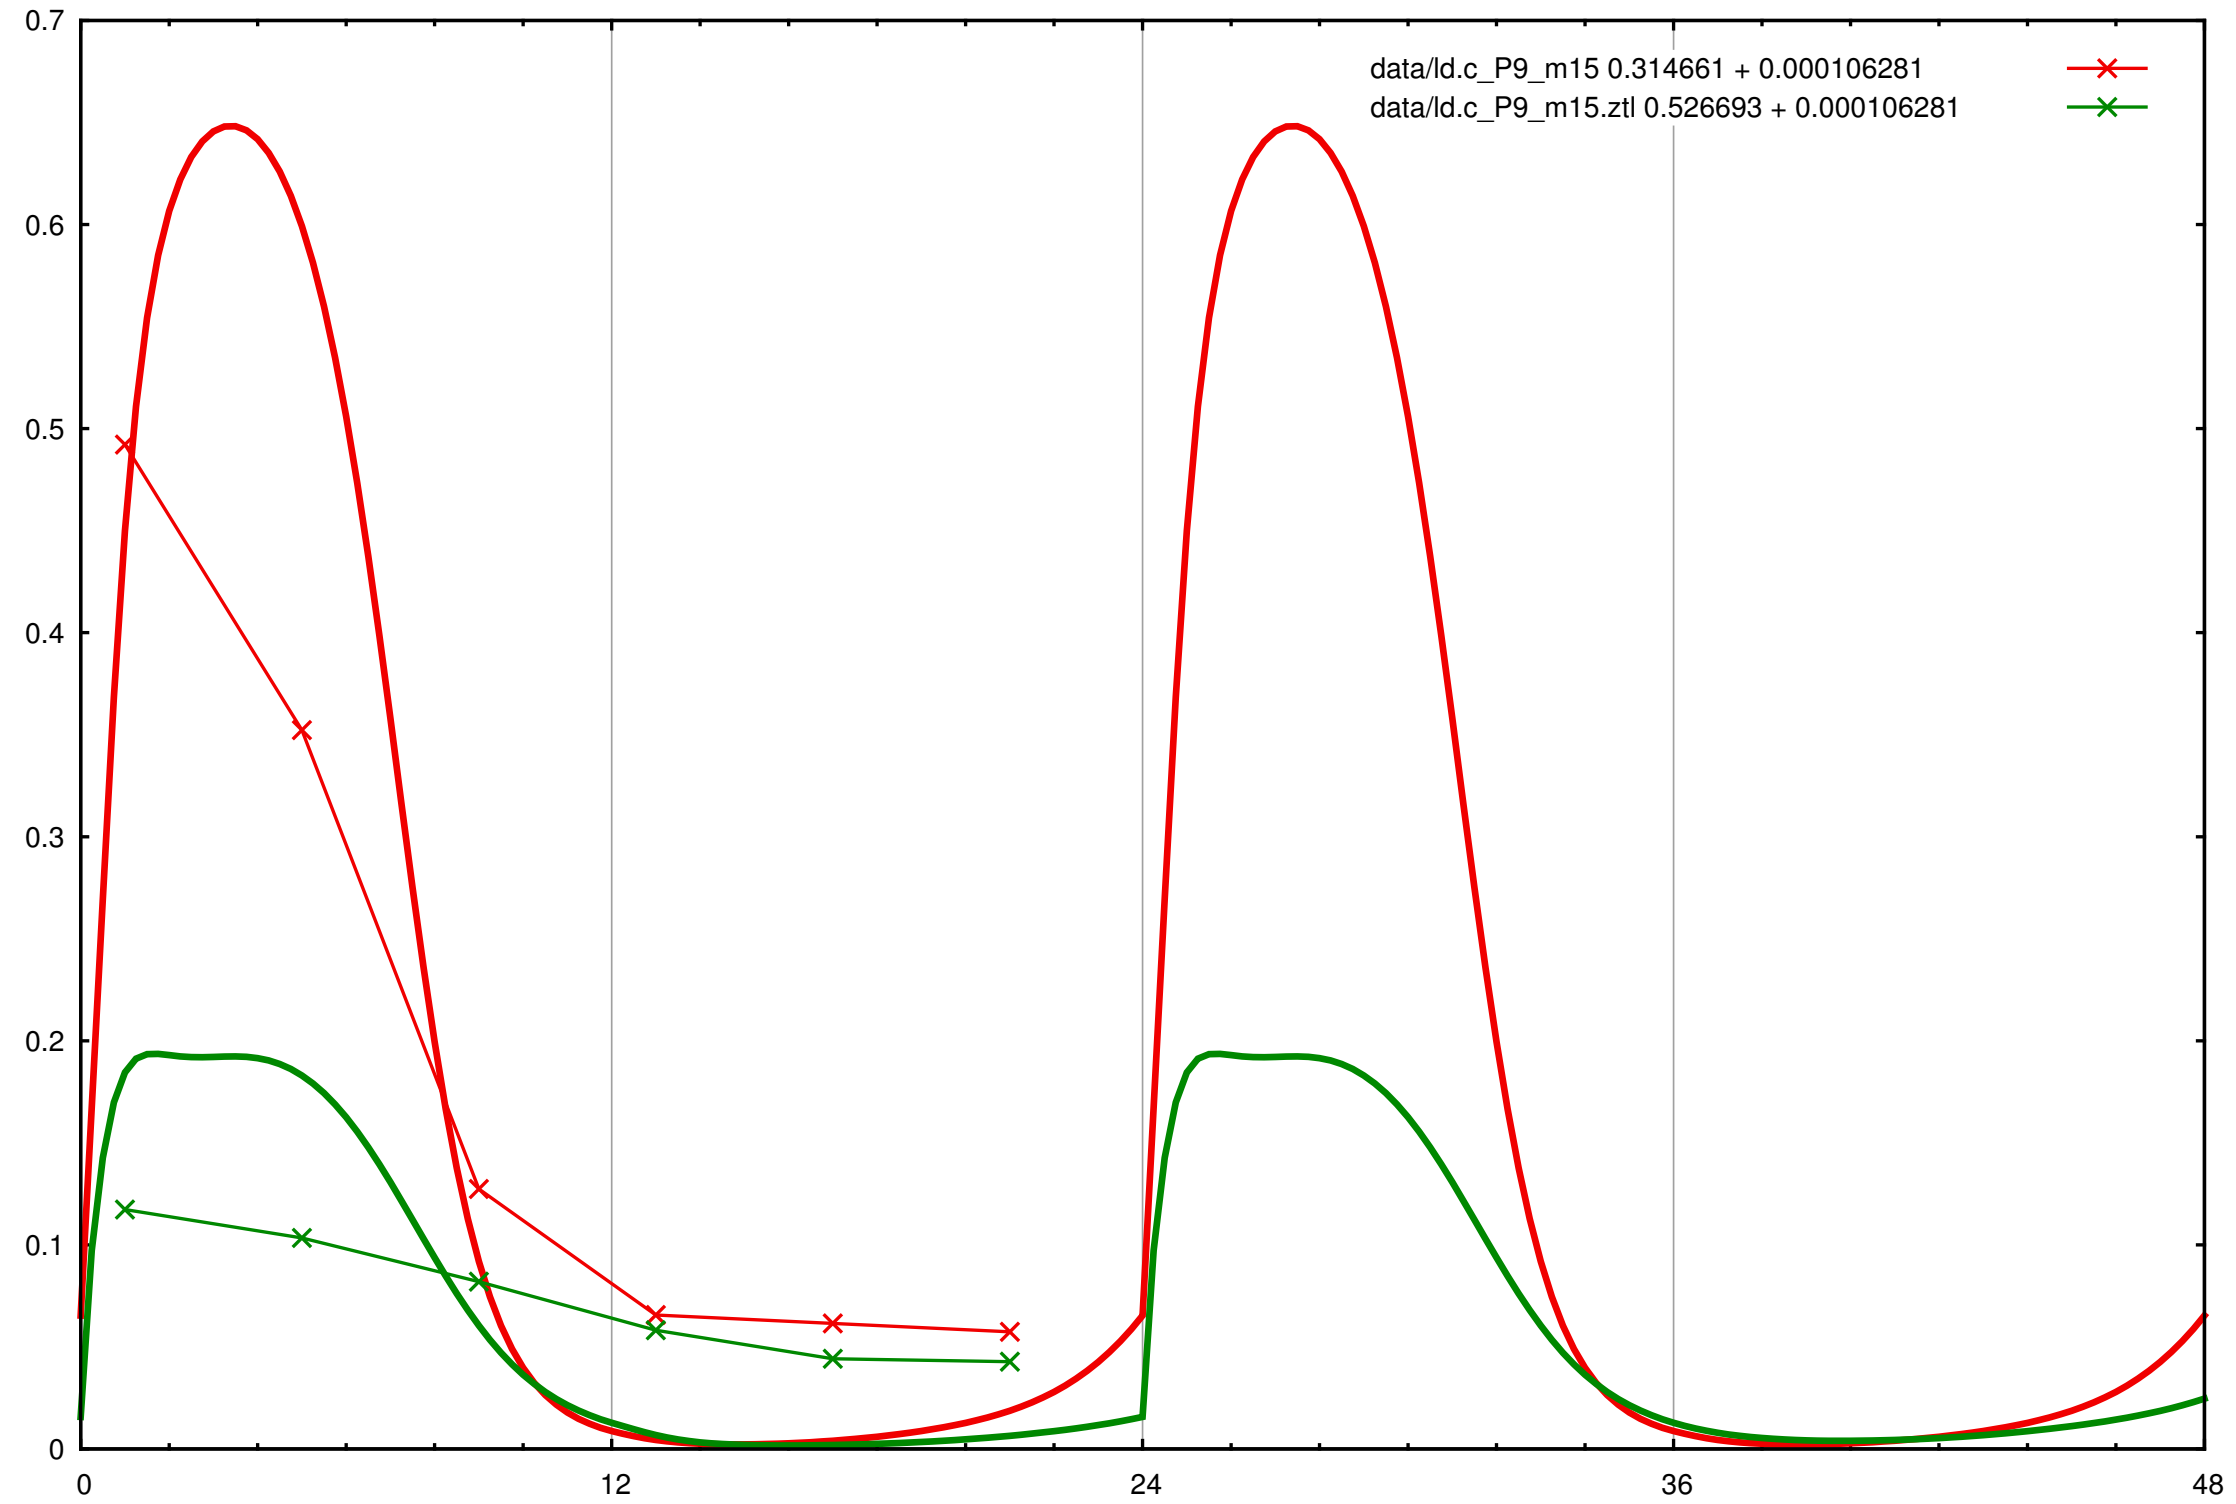

Scale group 213, scost 0

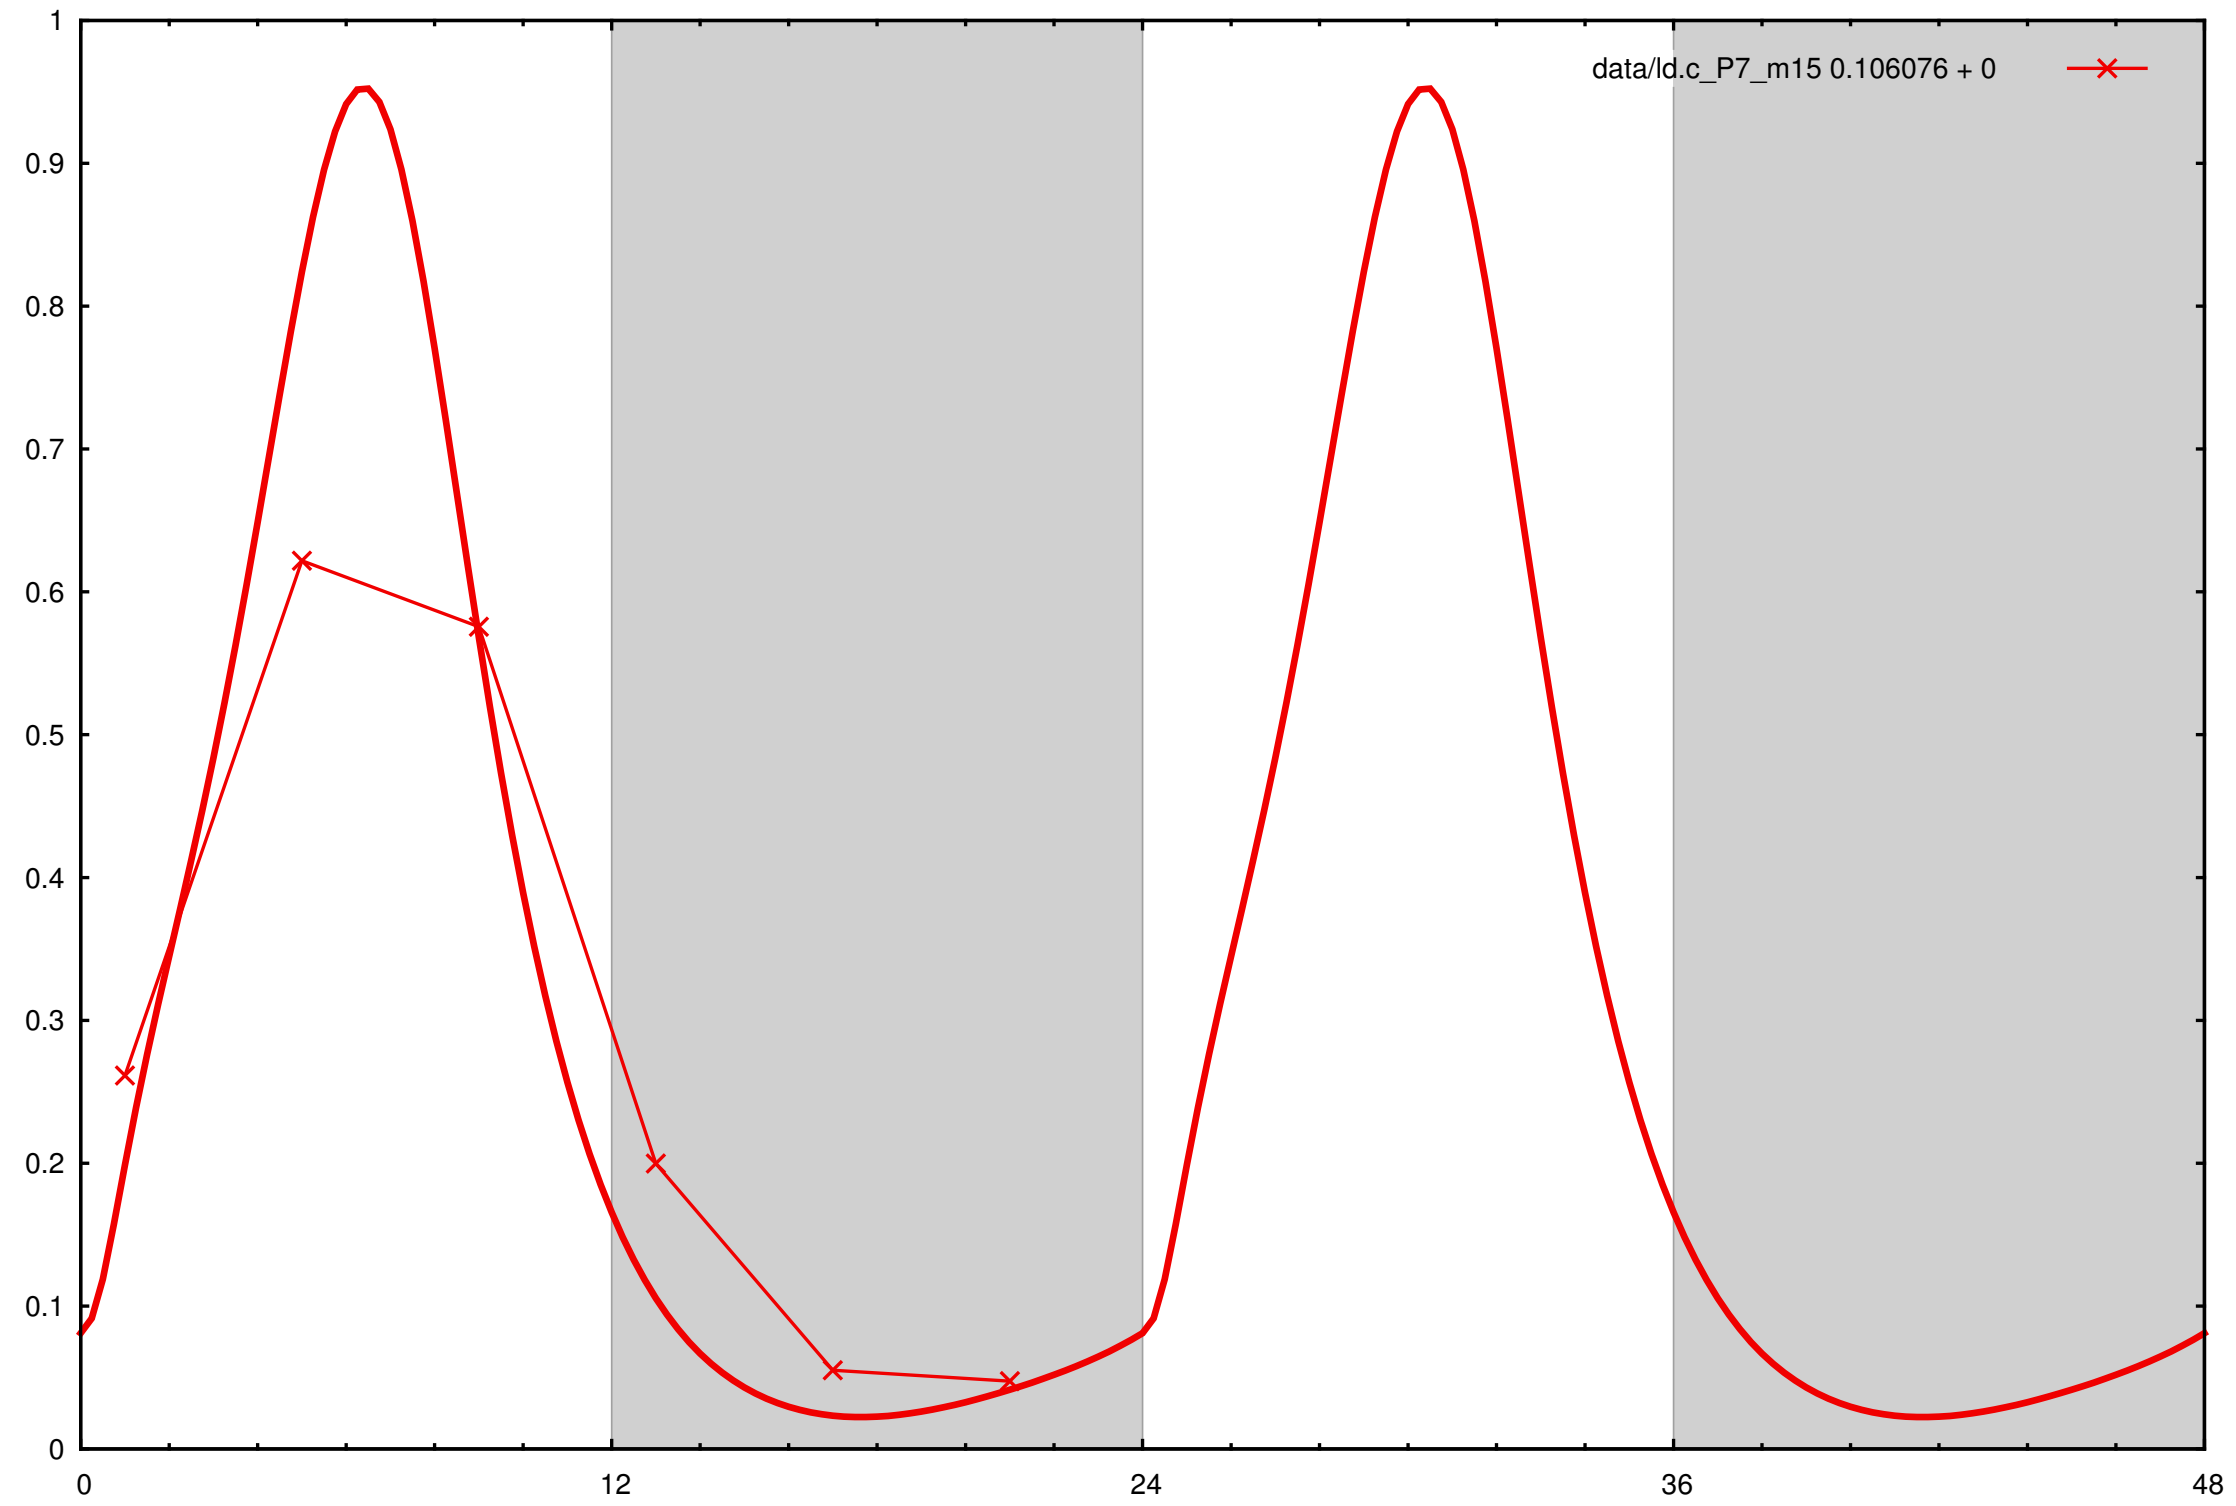

Scale group 214, scost 0

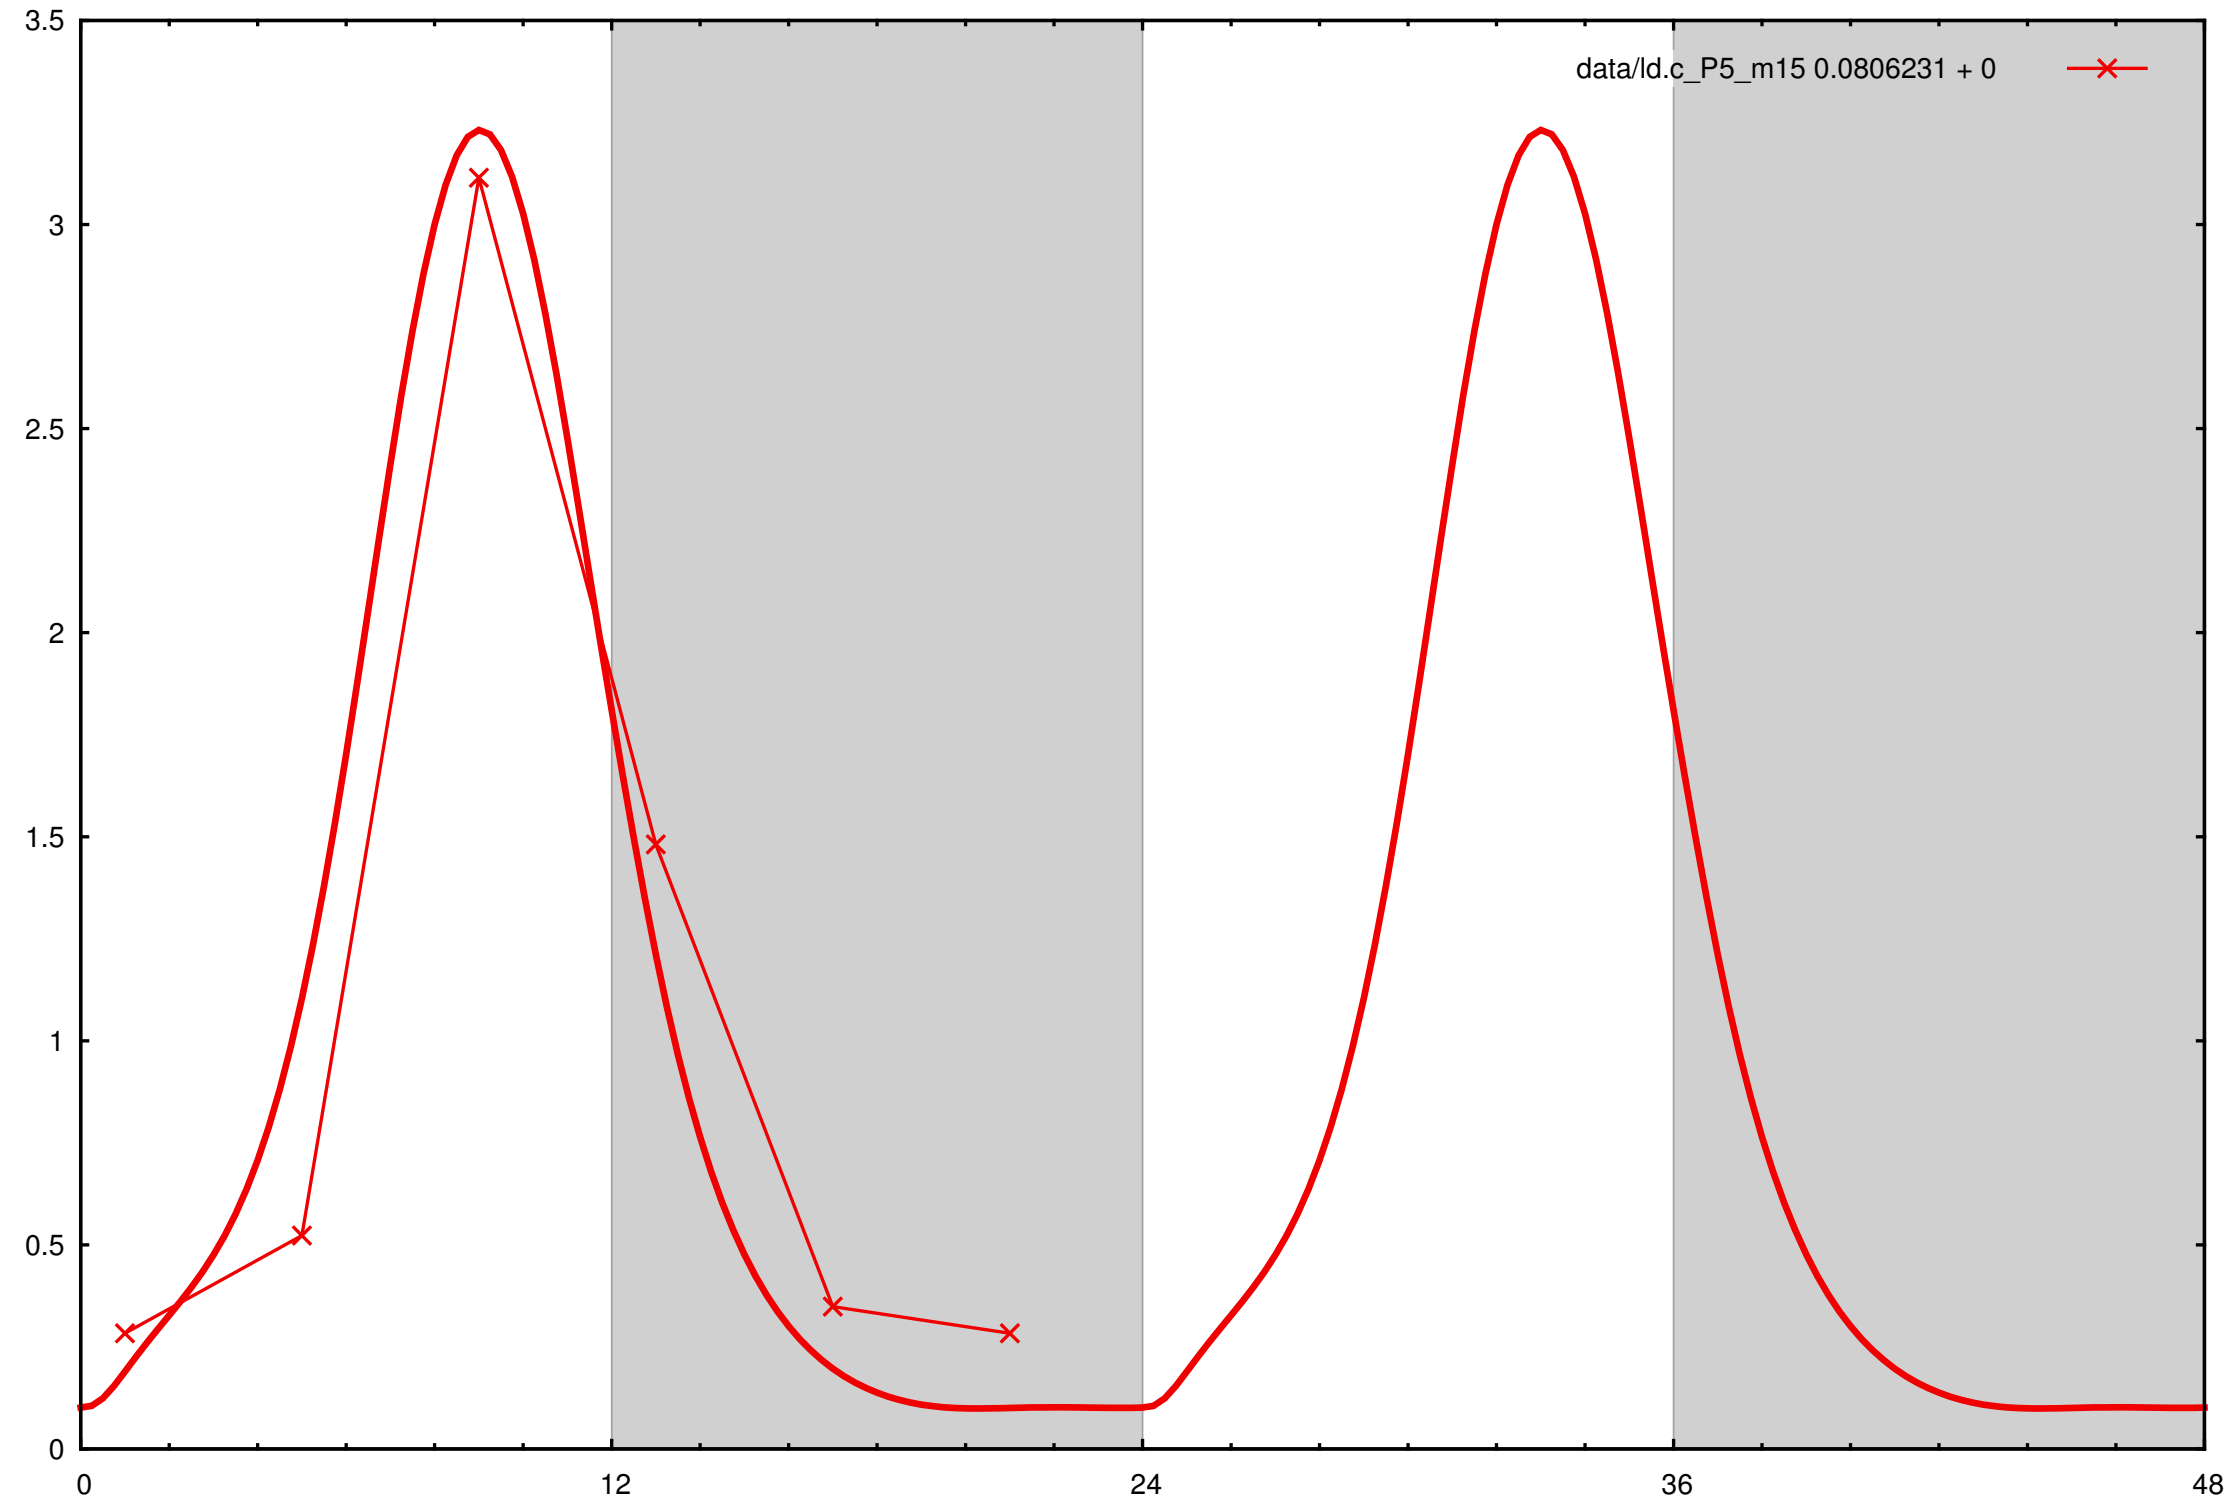

Scale group 215, scost 0

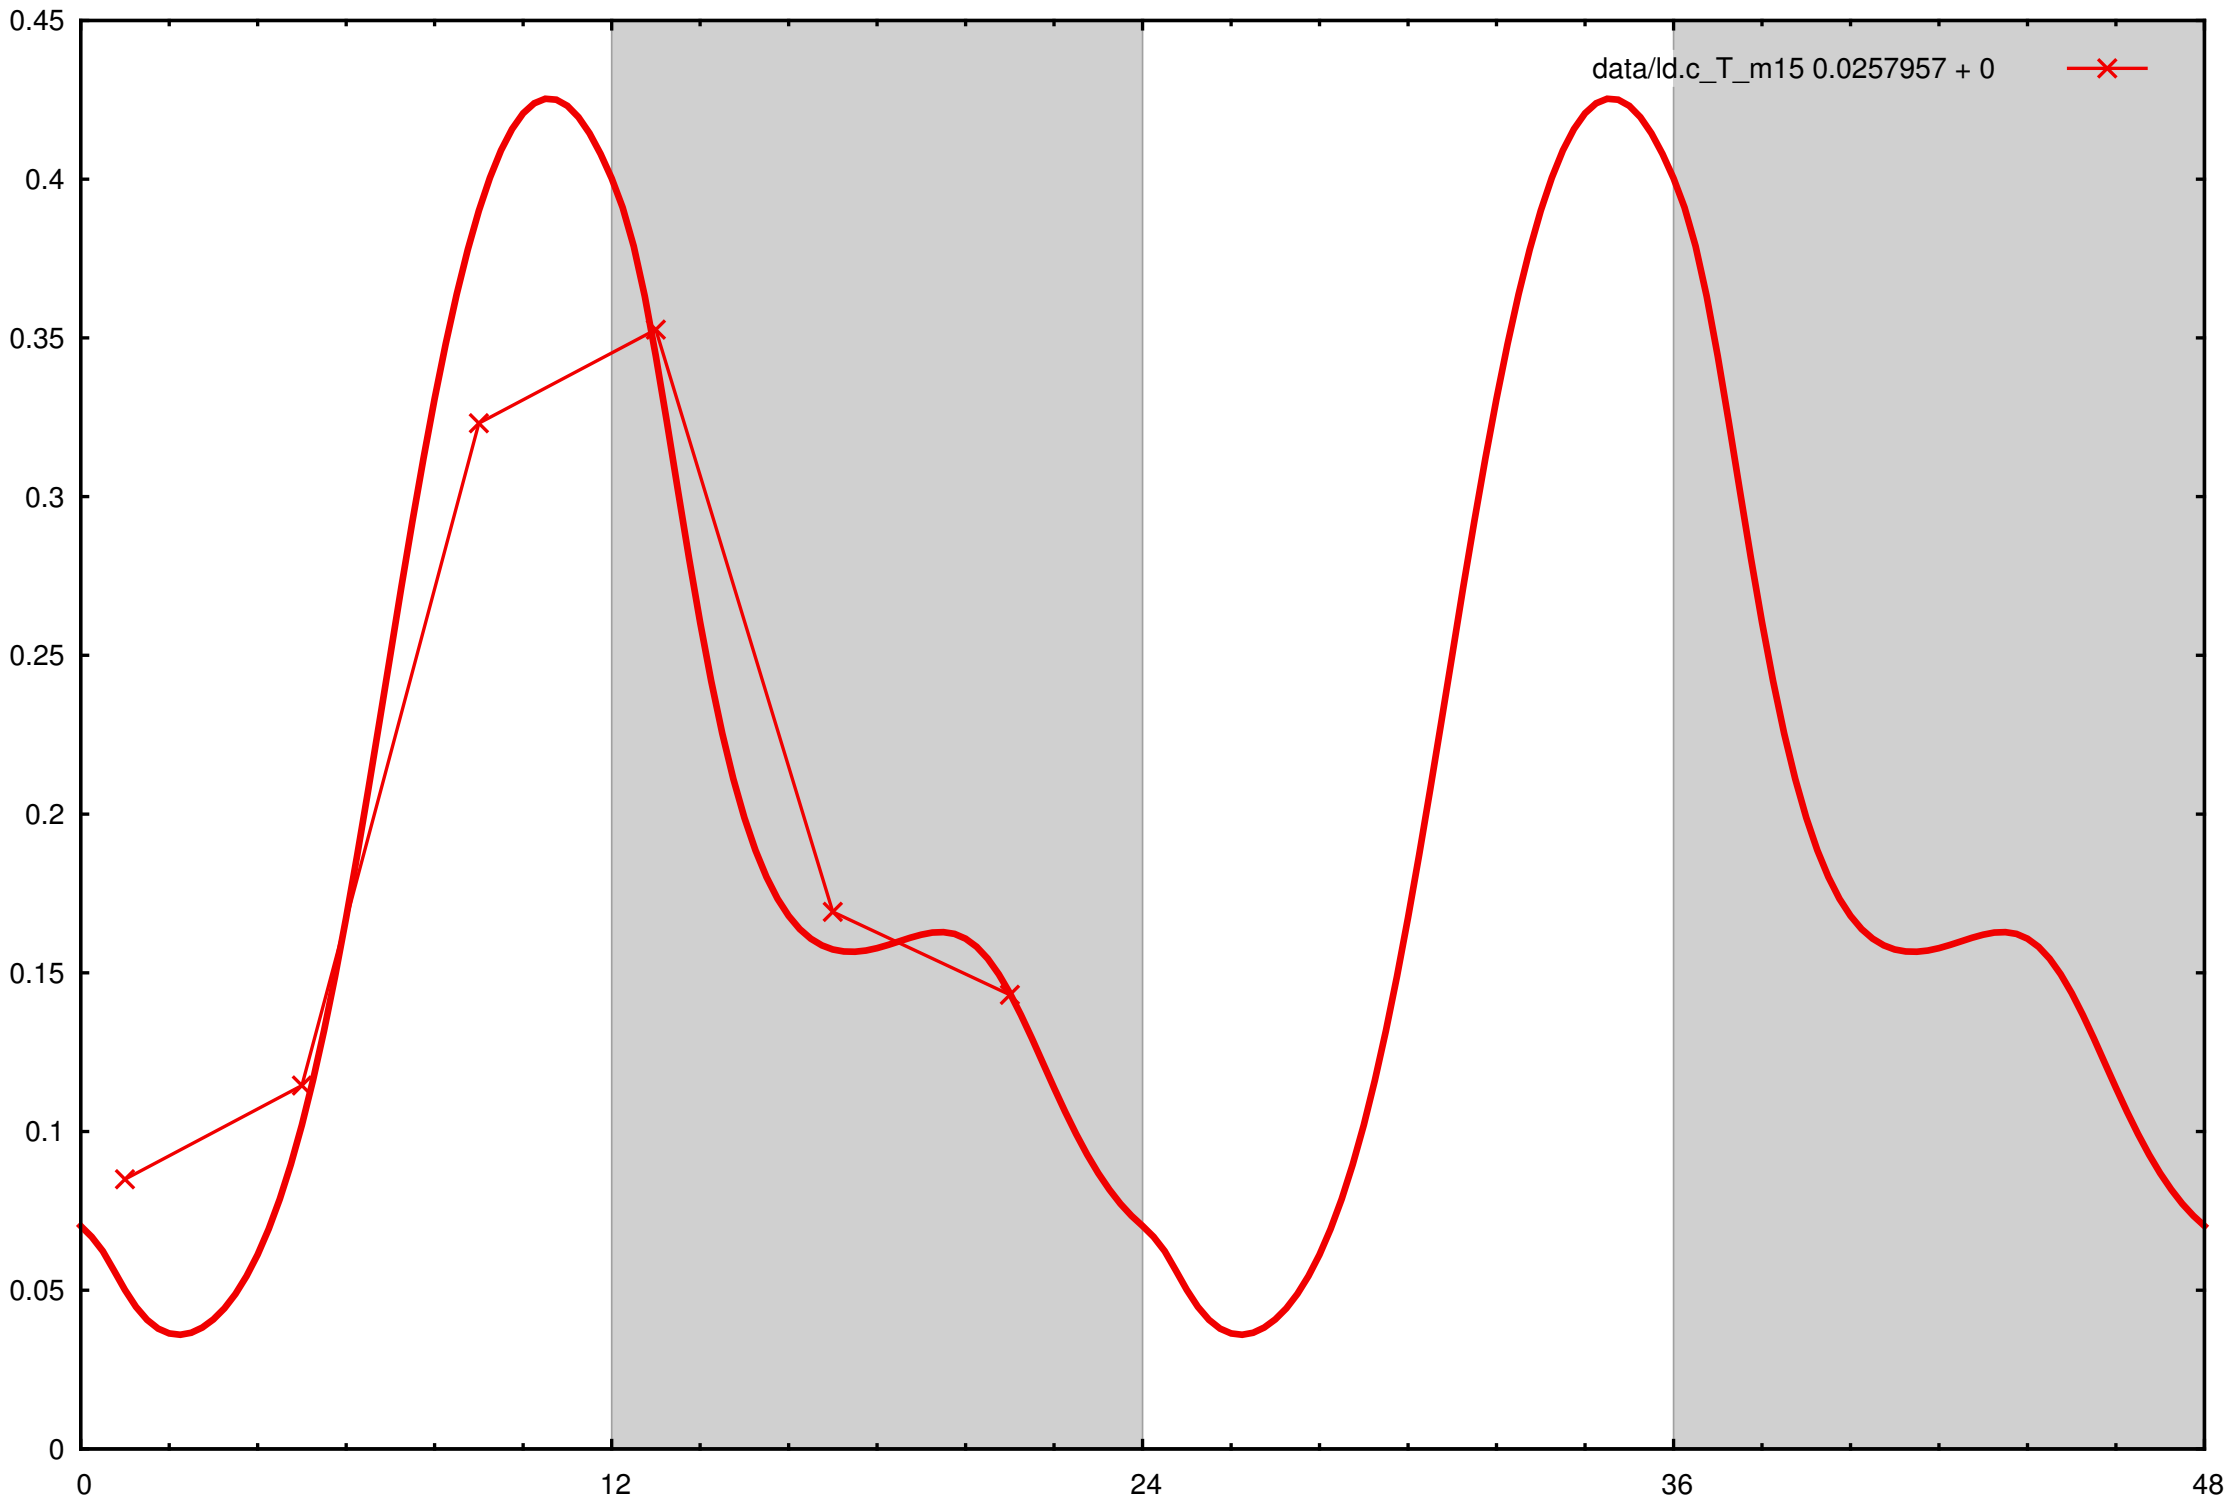

Scale group 216, scost 0.335178

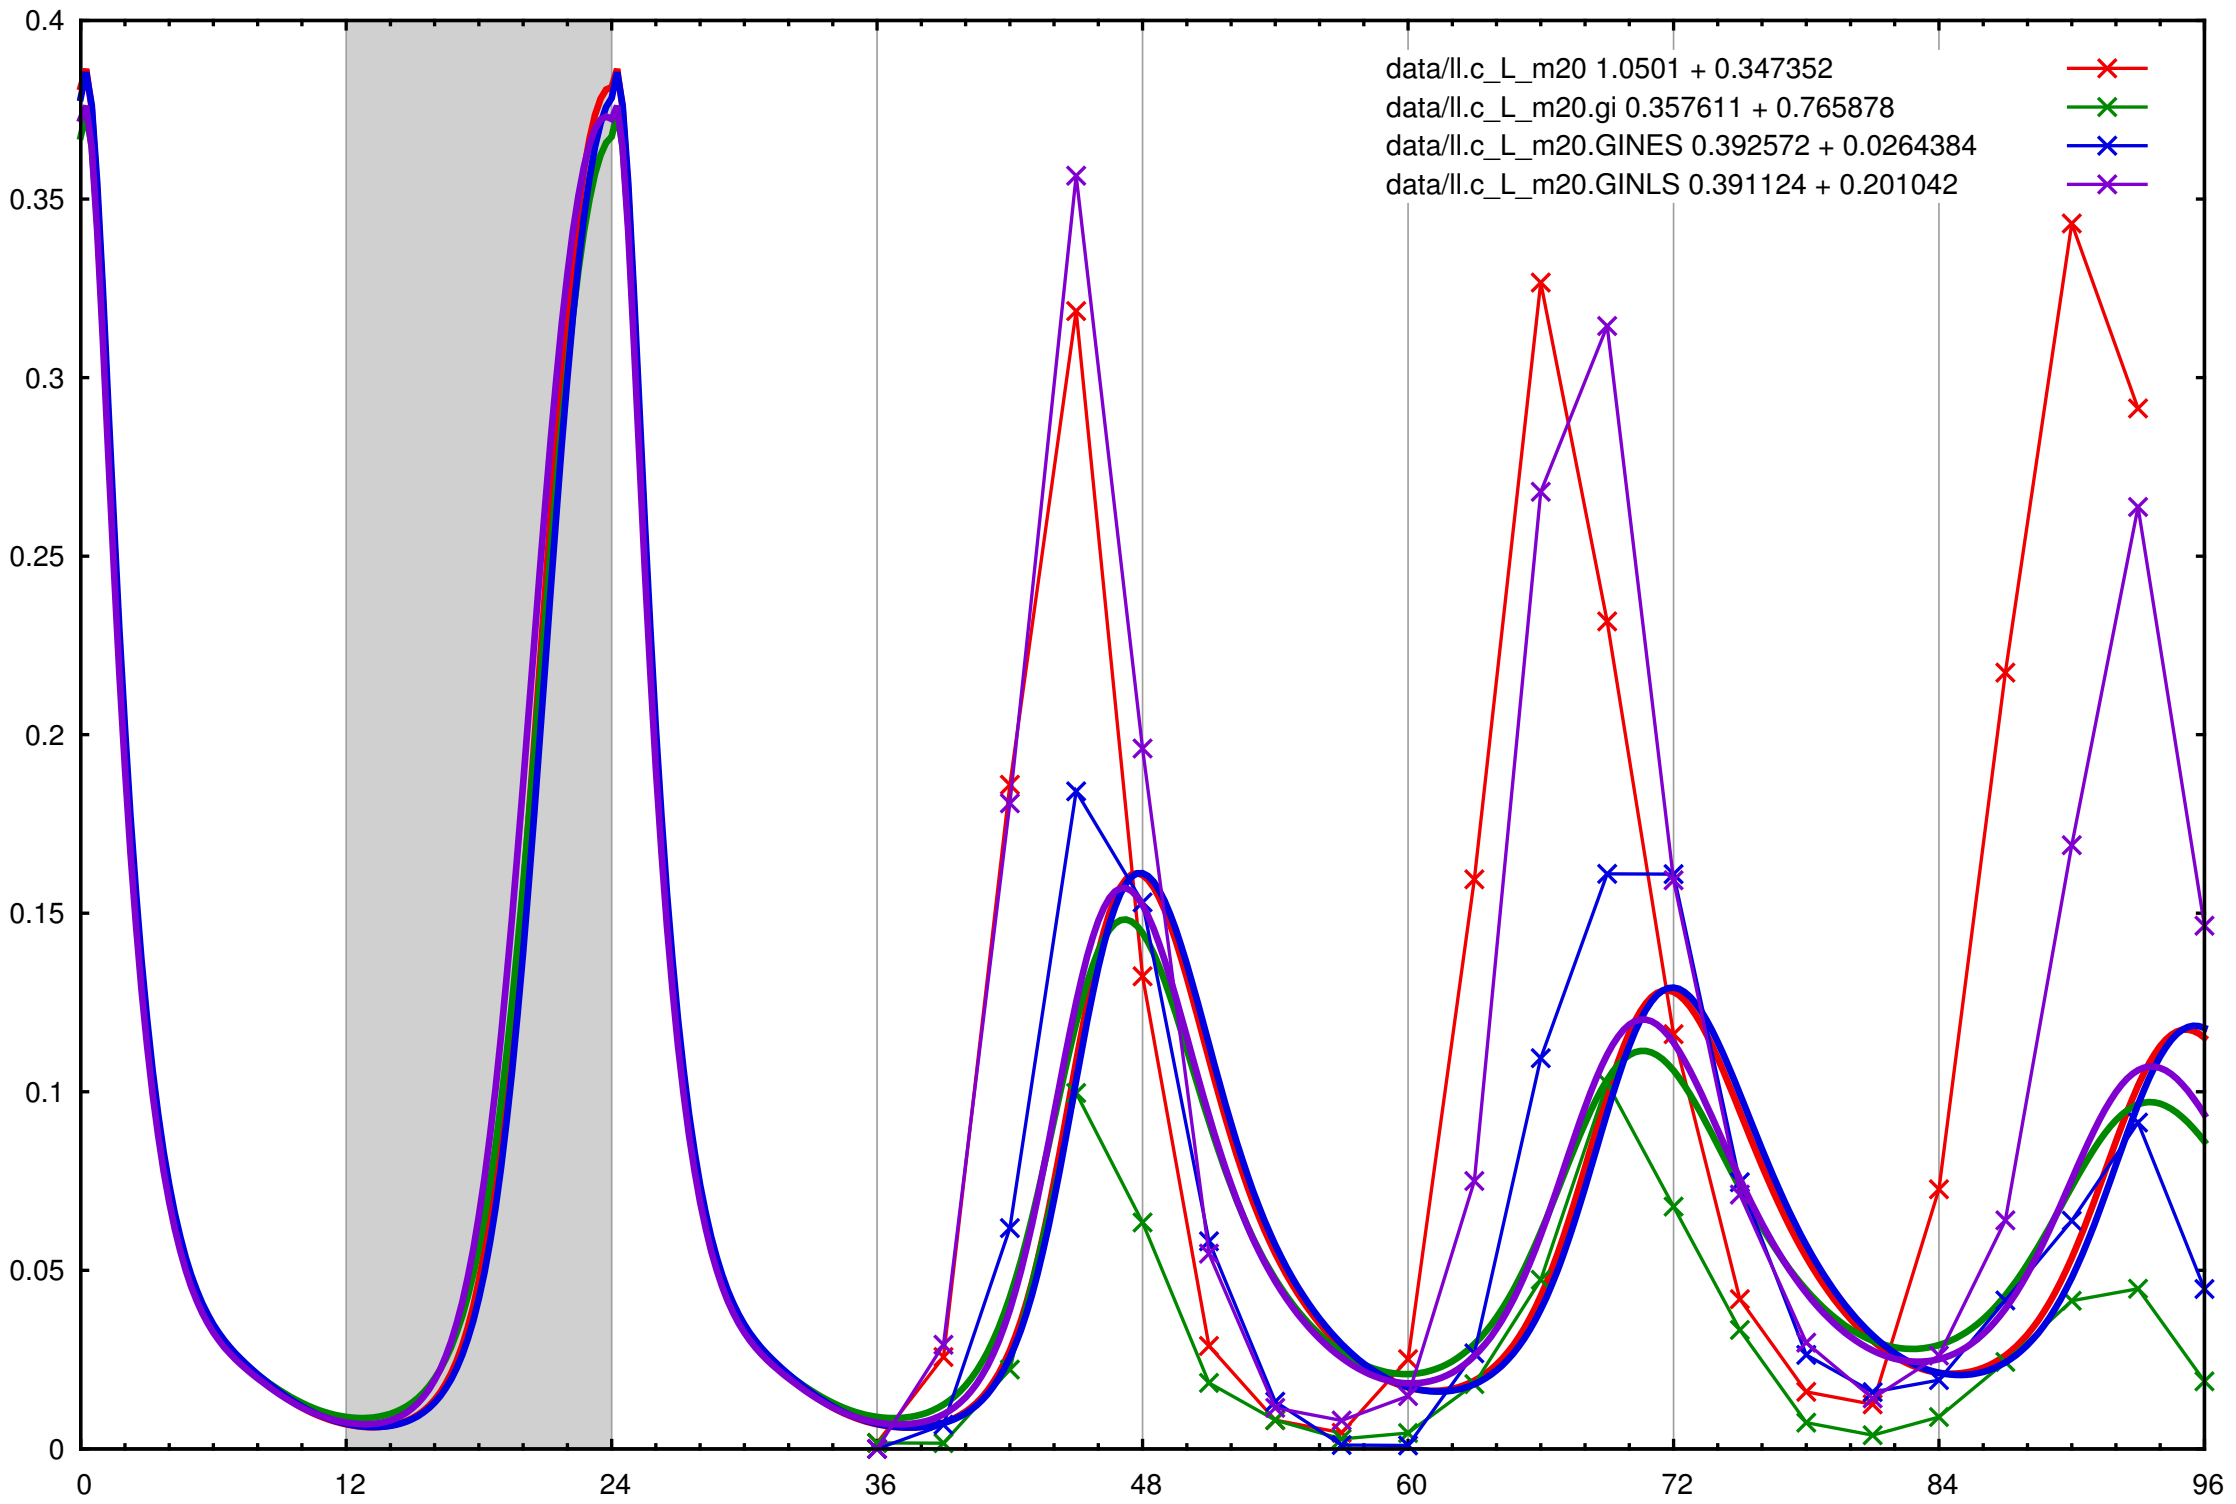



Scale group 217, scost 0.00809942

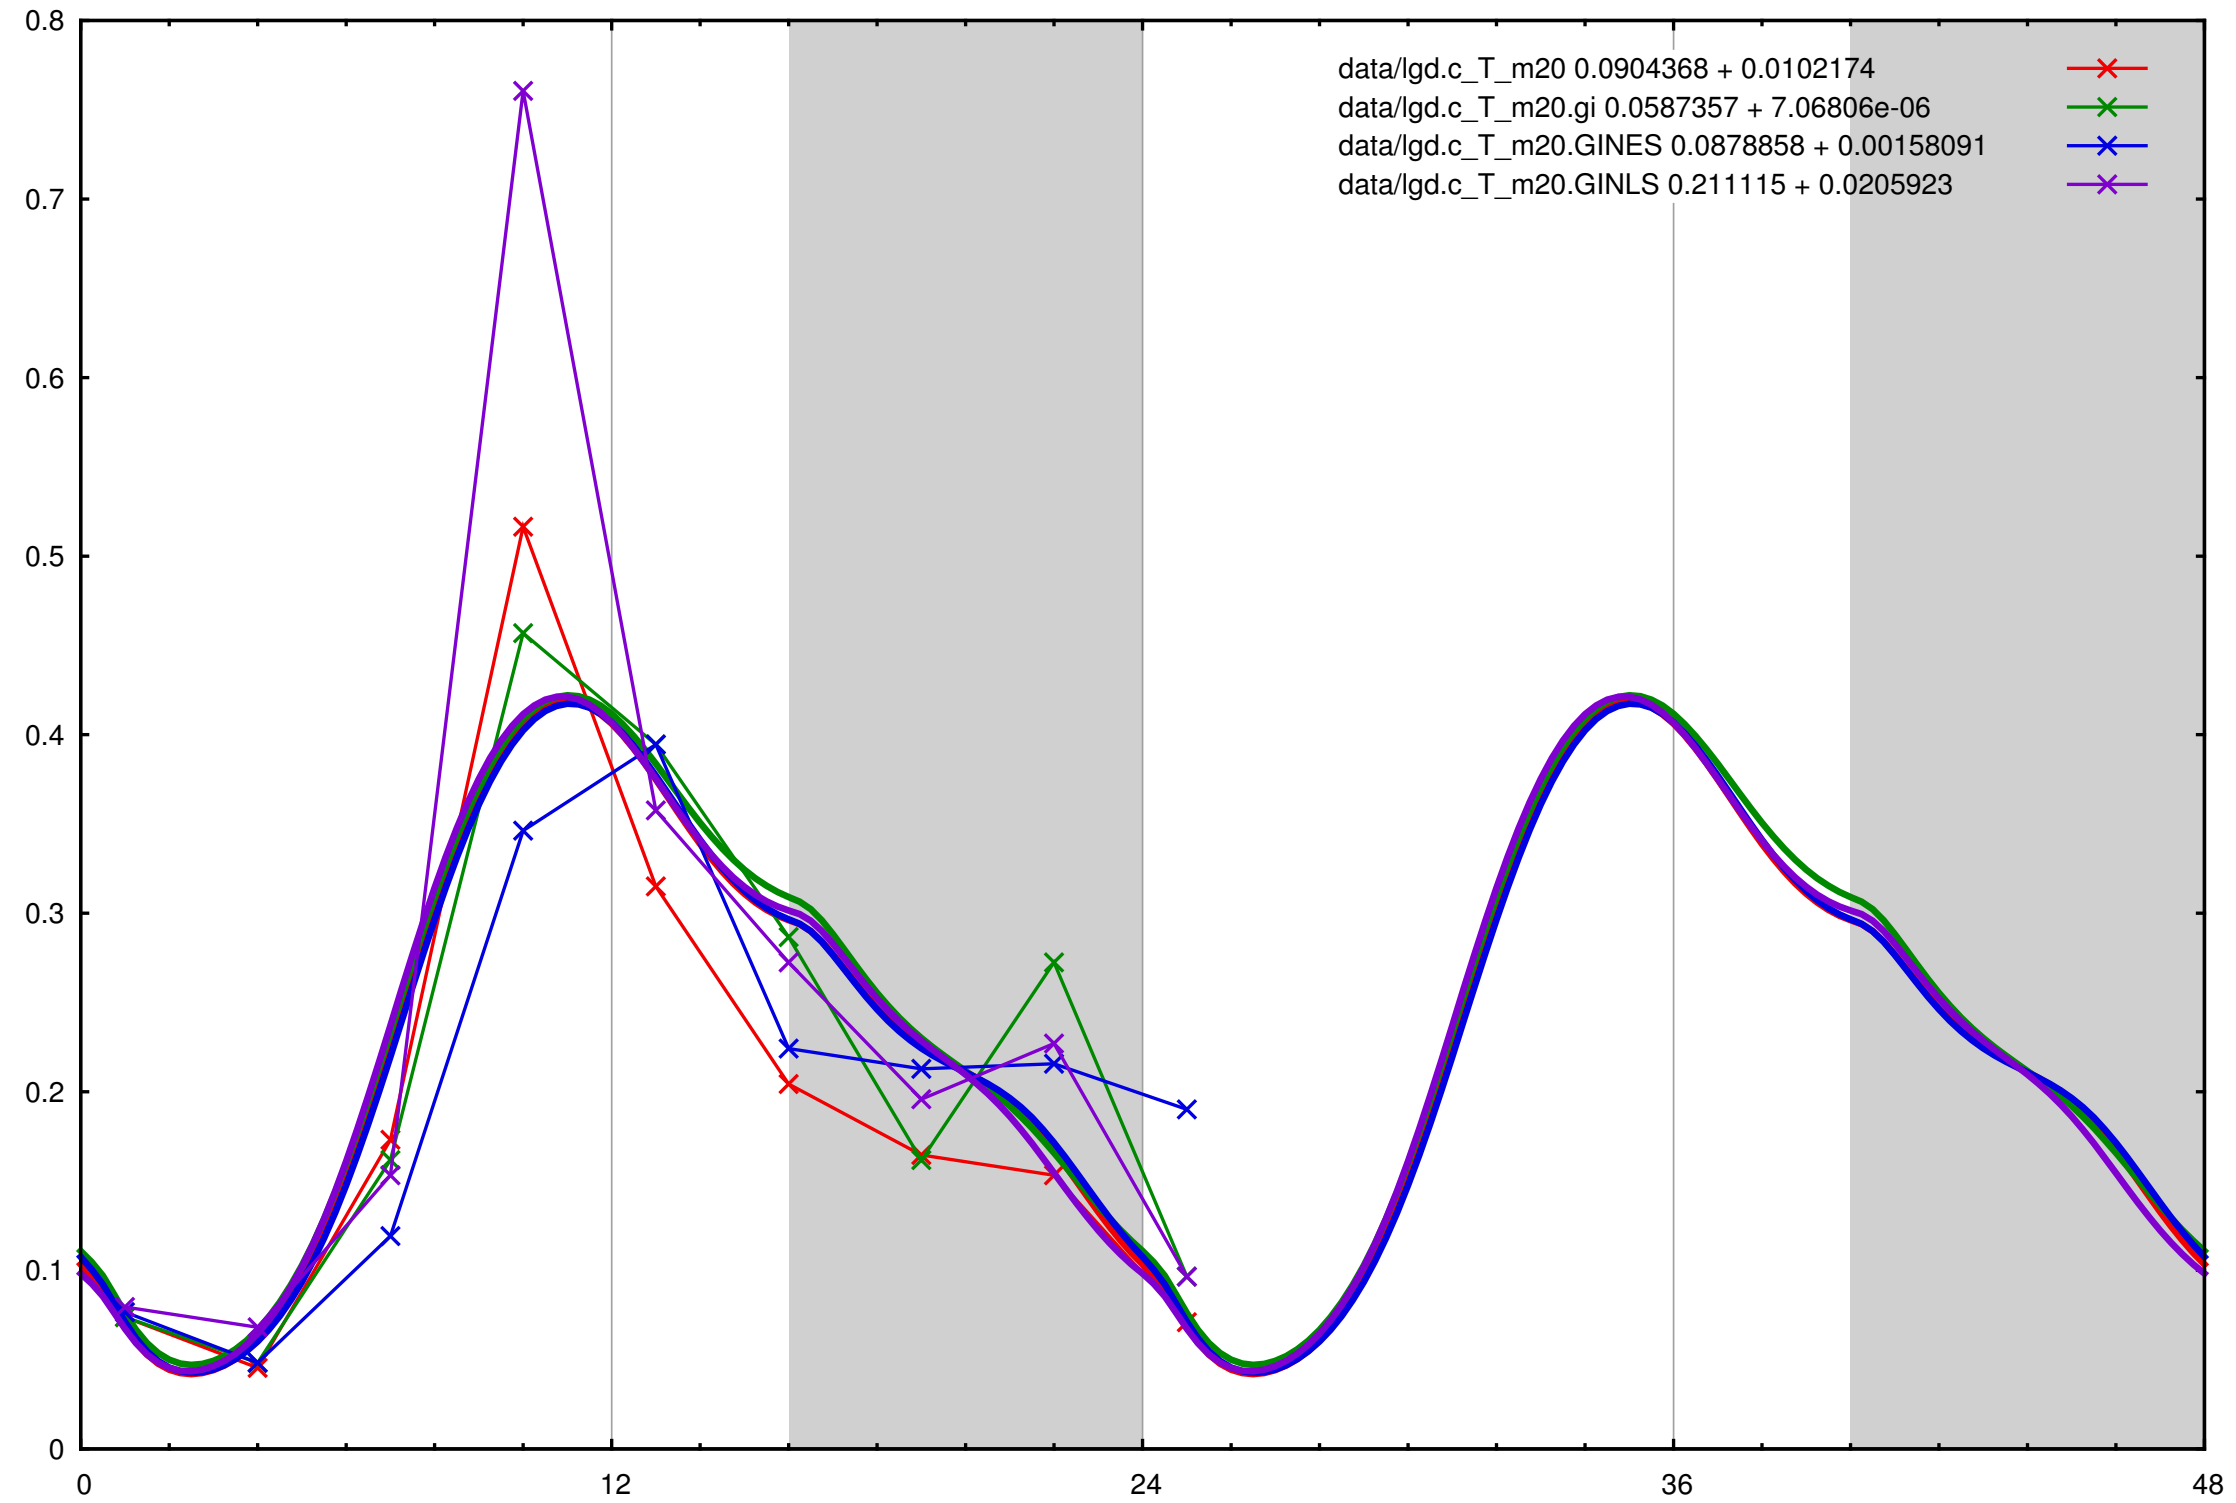

Scale group 218, scost 0.307586

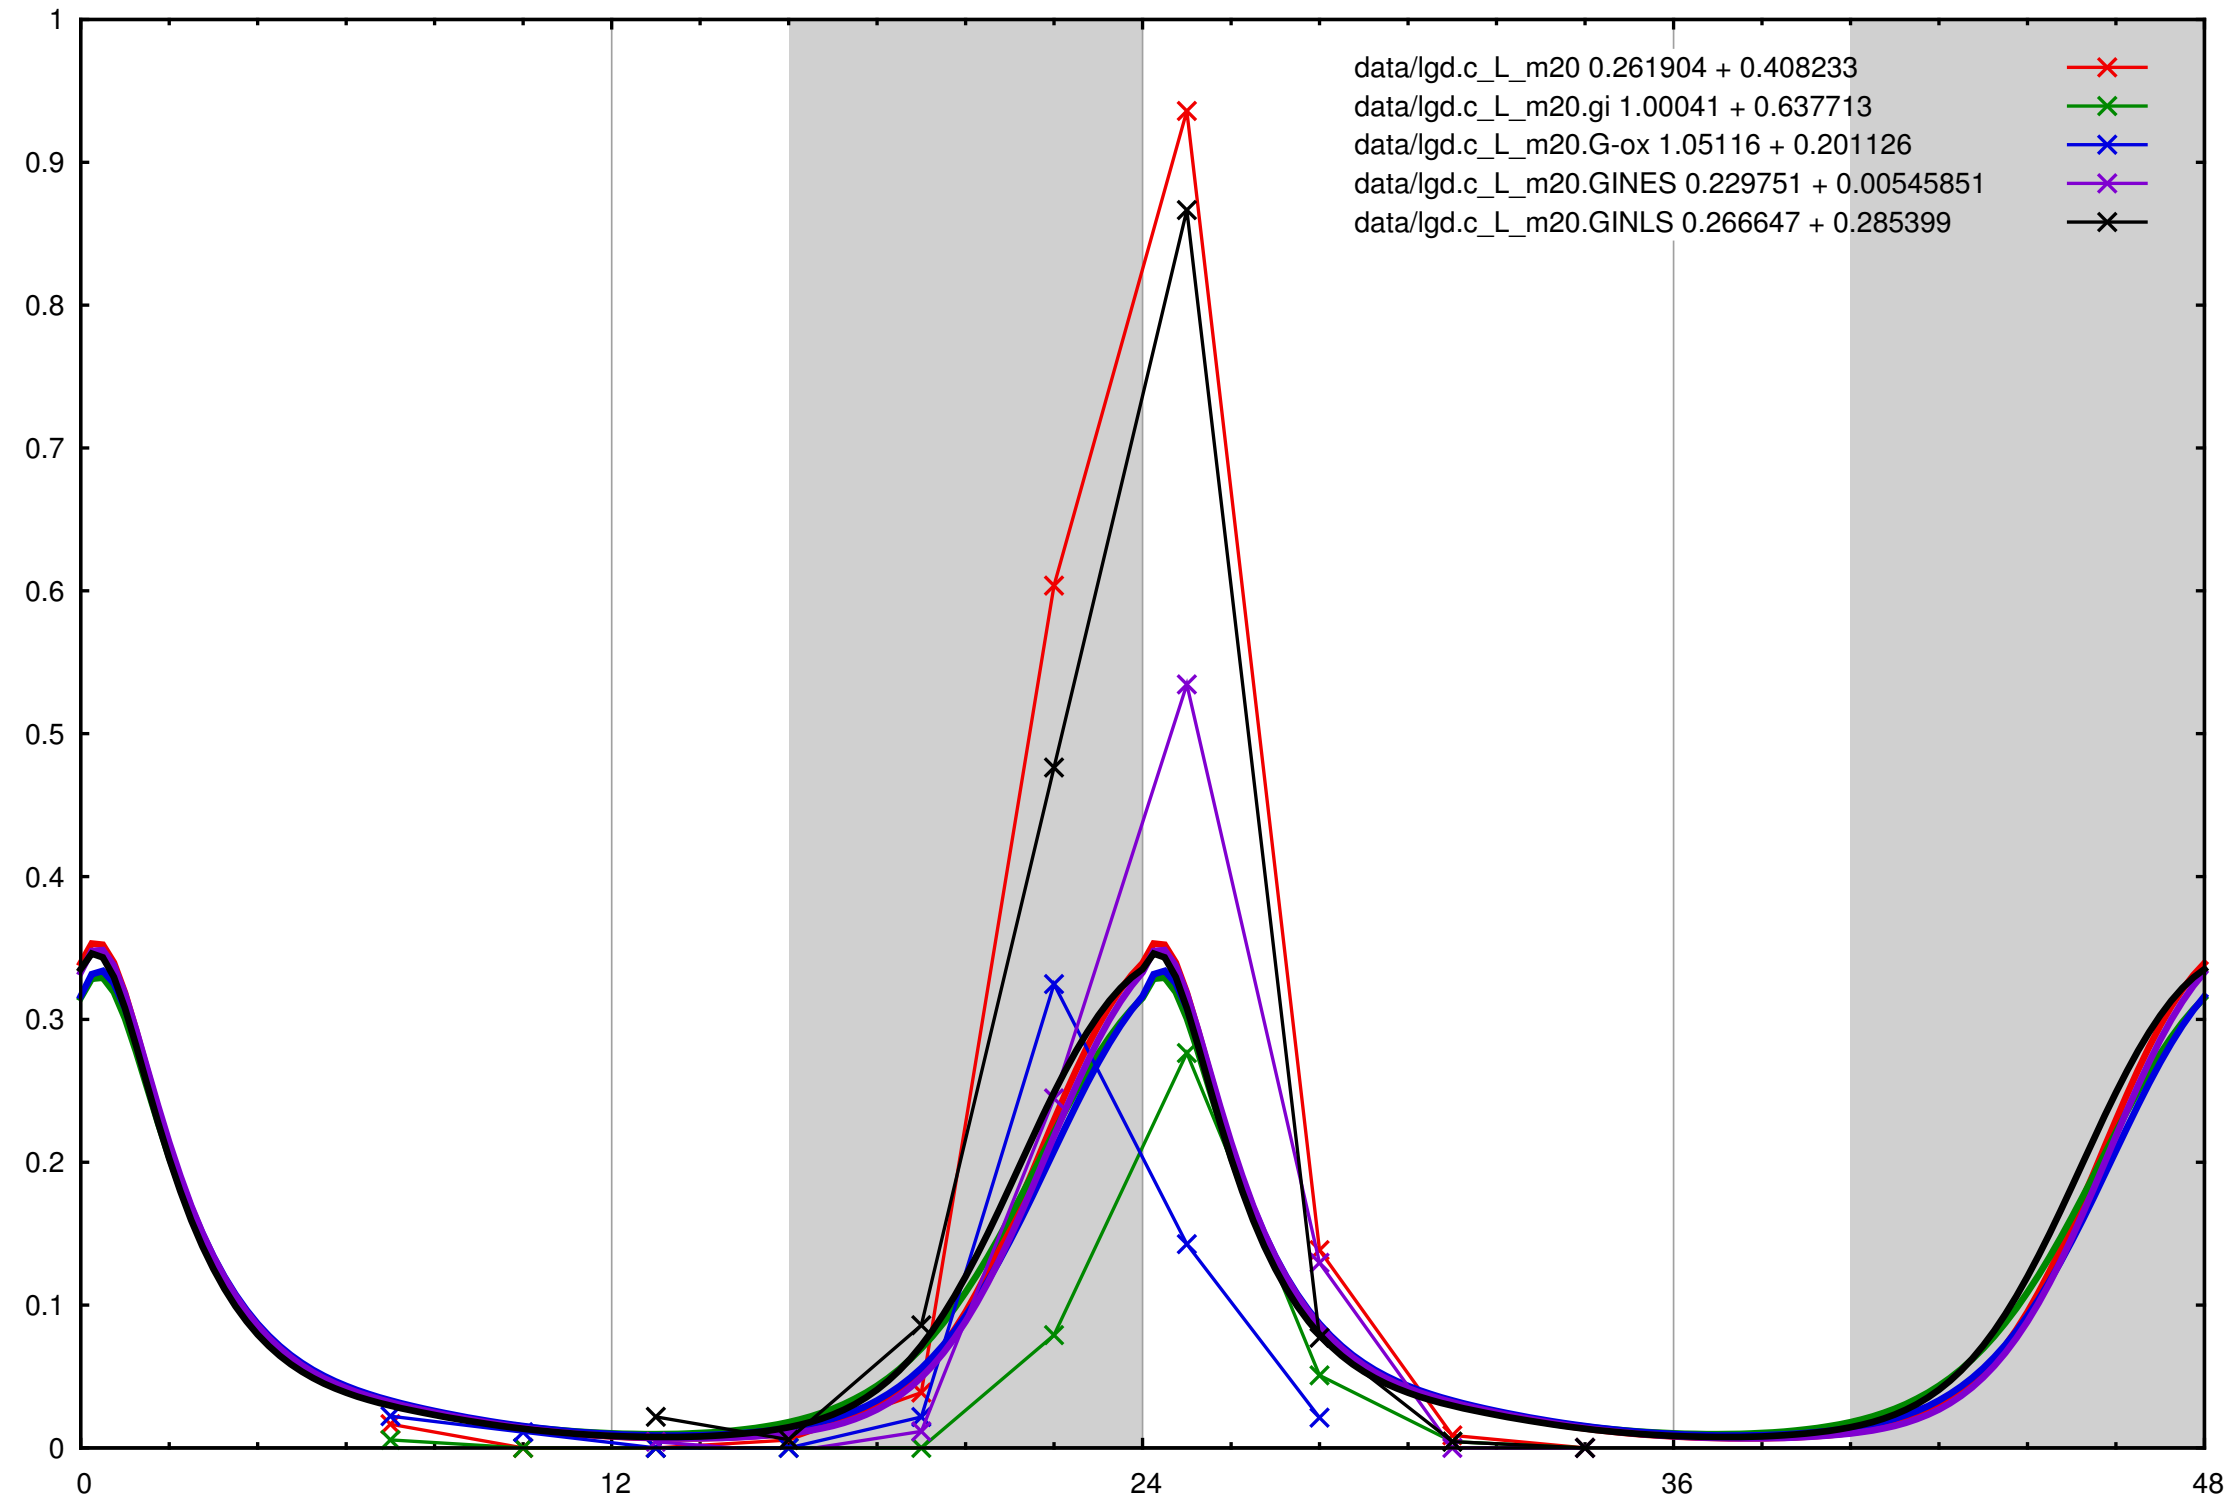

Scale group 219, scost 0.111106

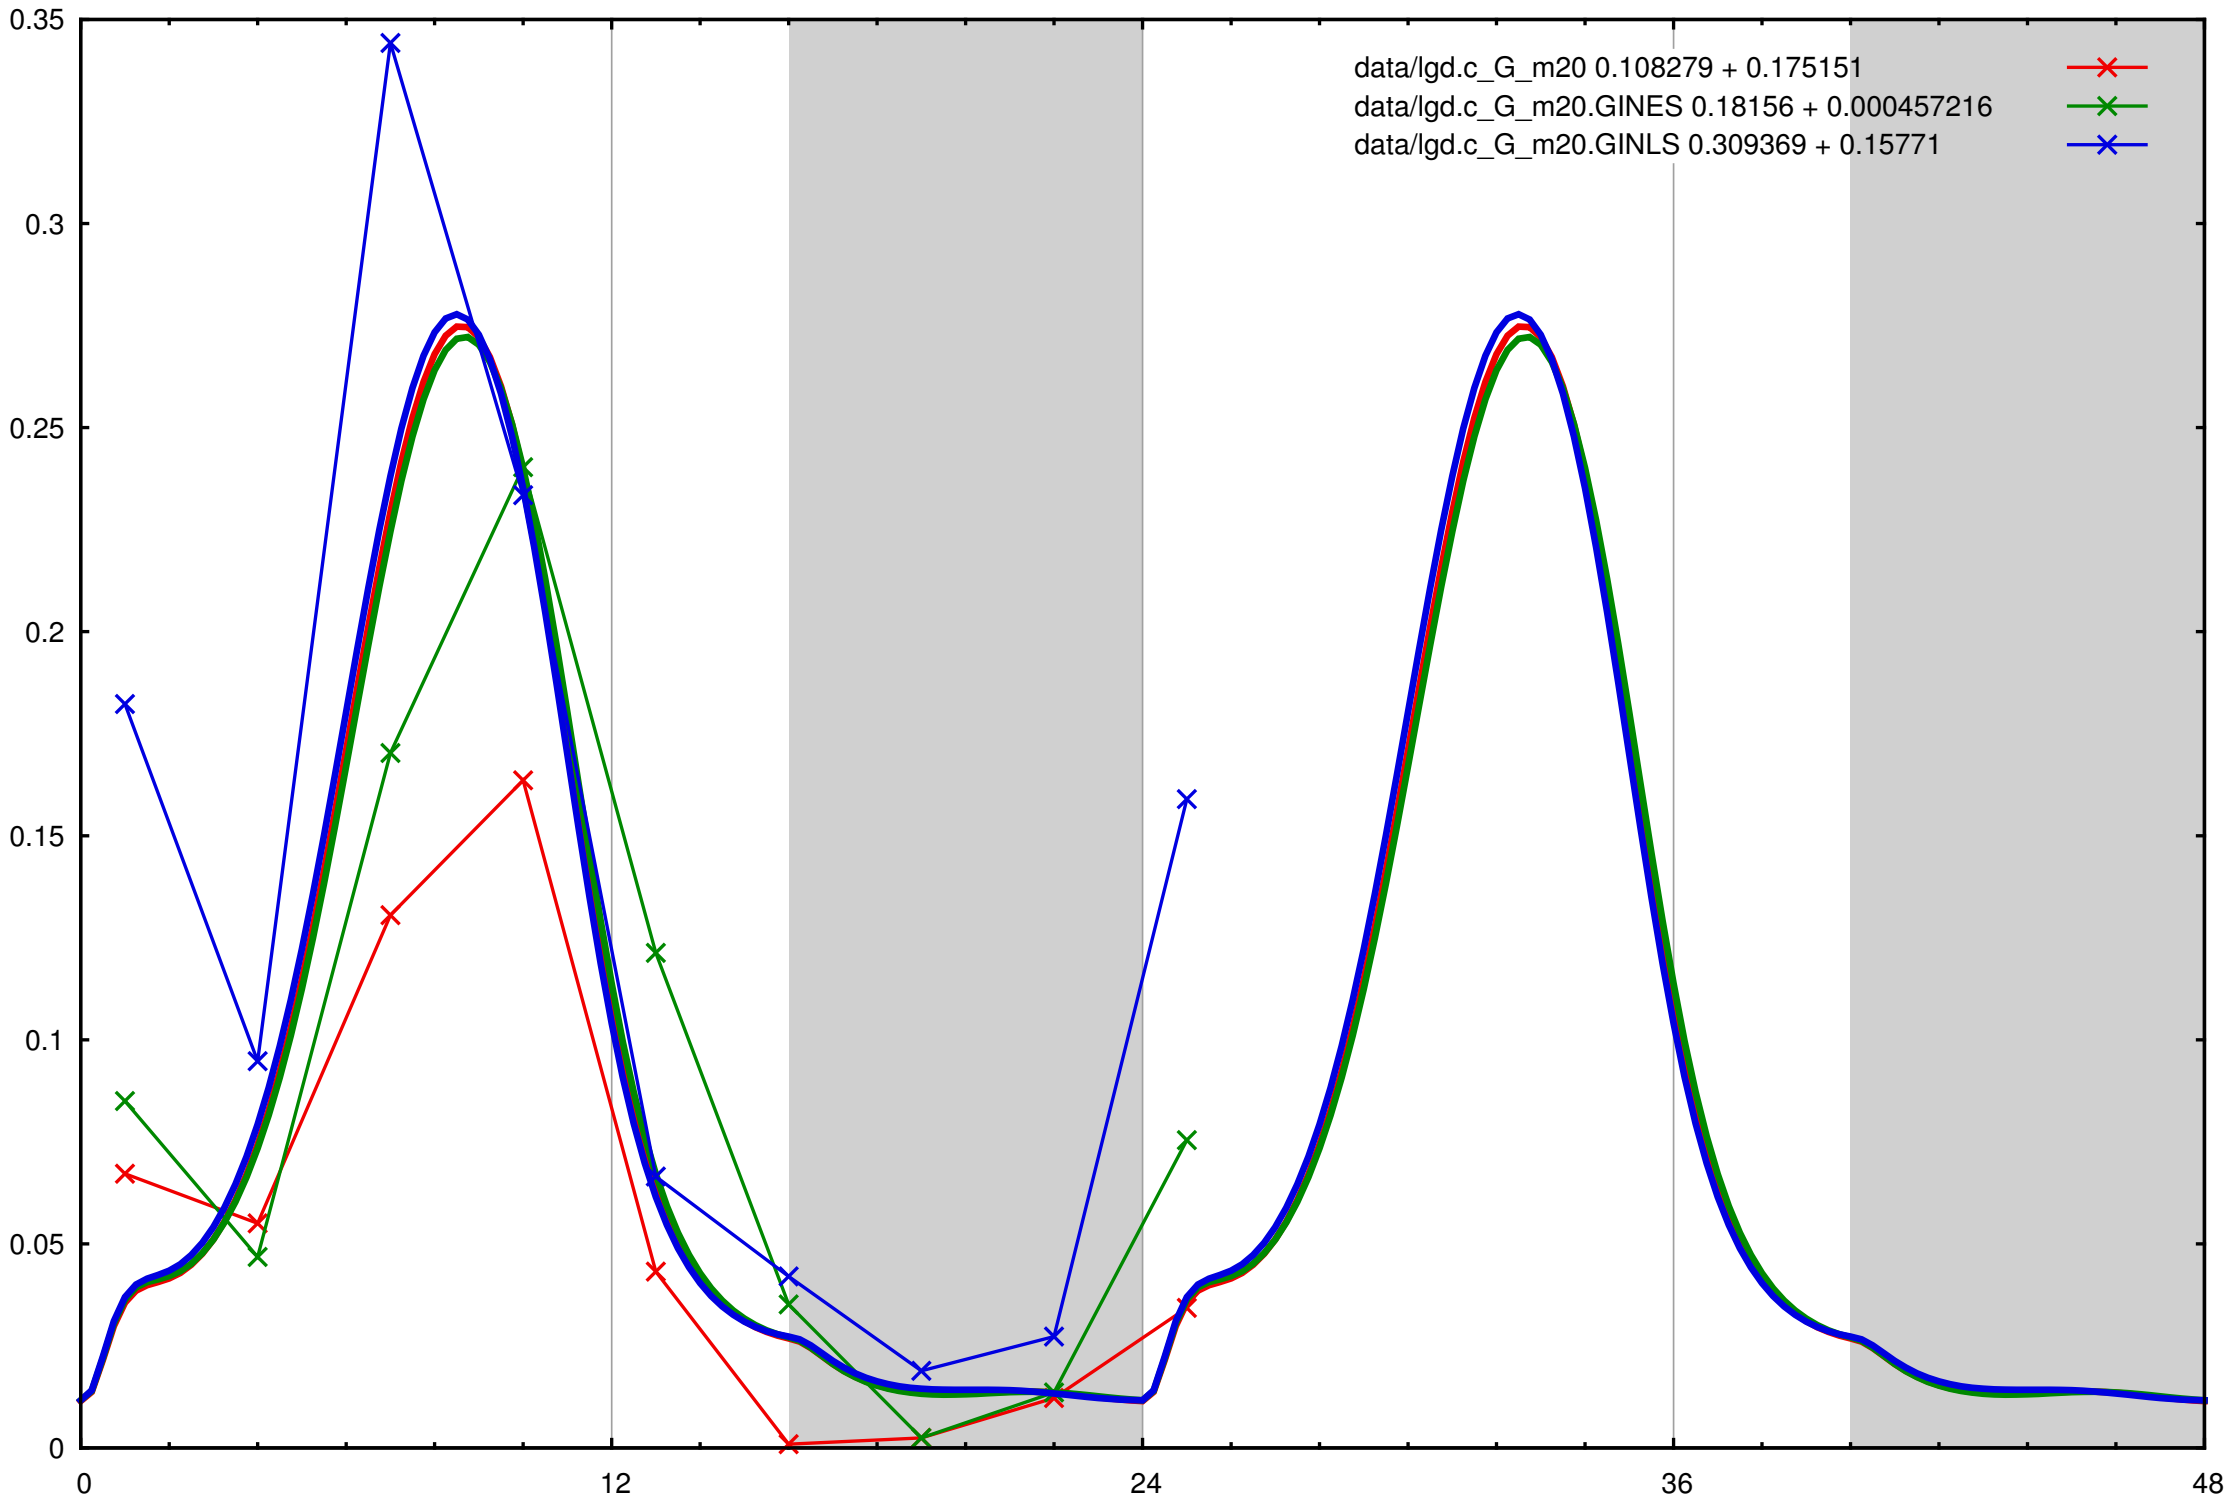

Scale group 220, scost 0

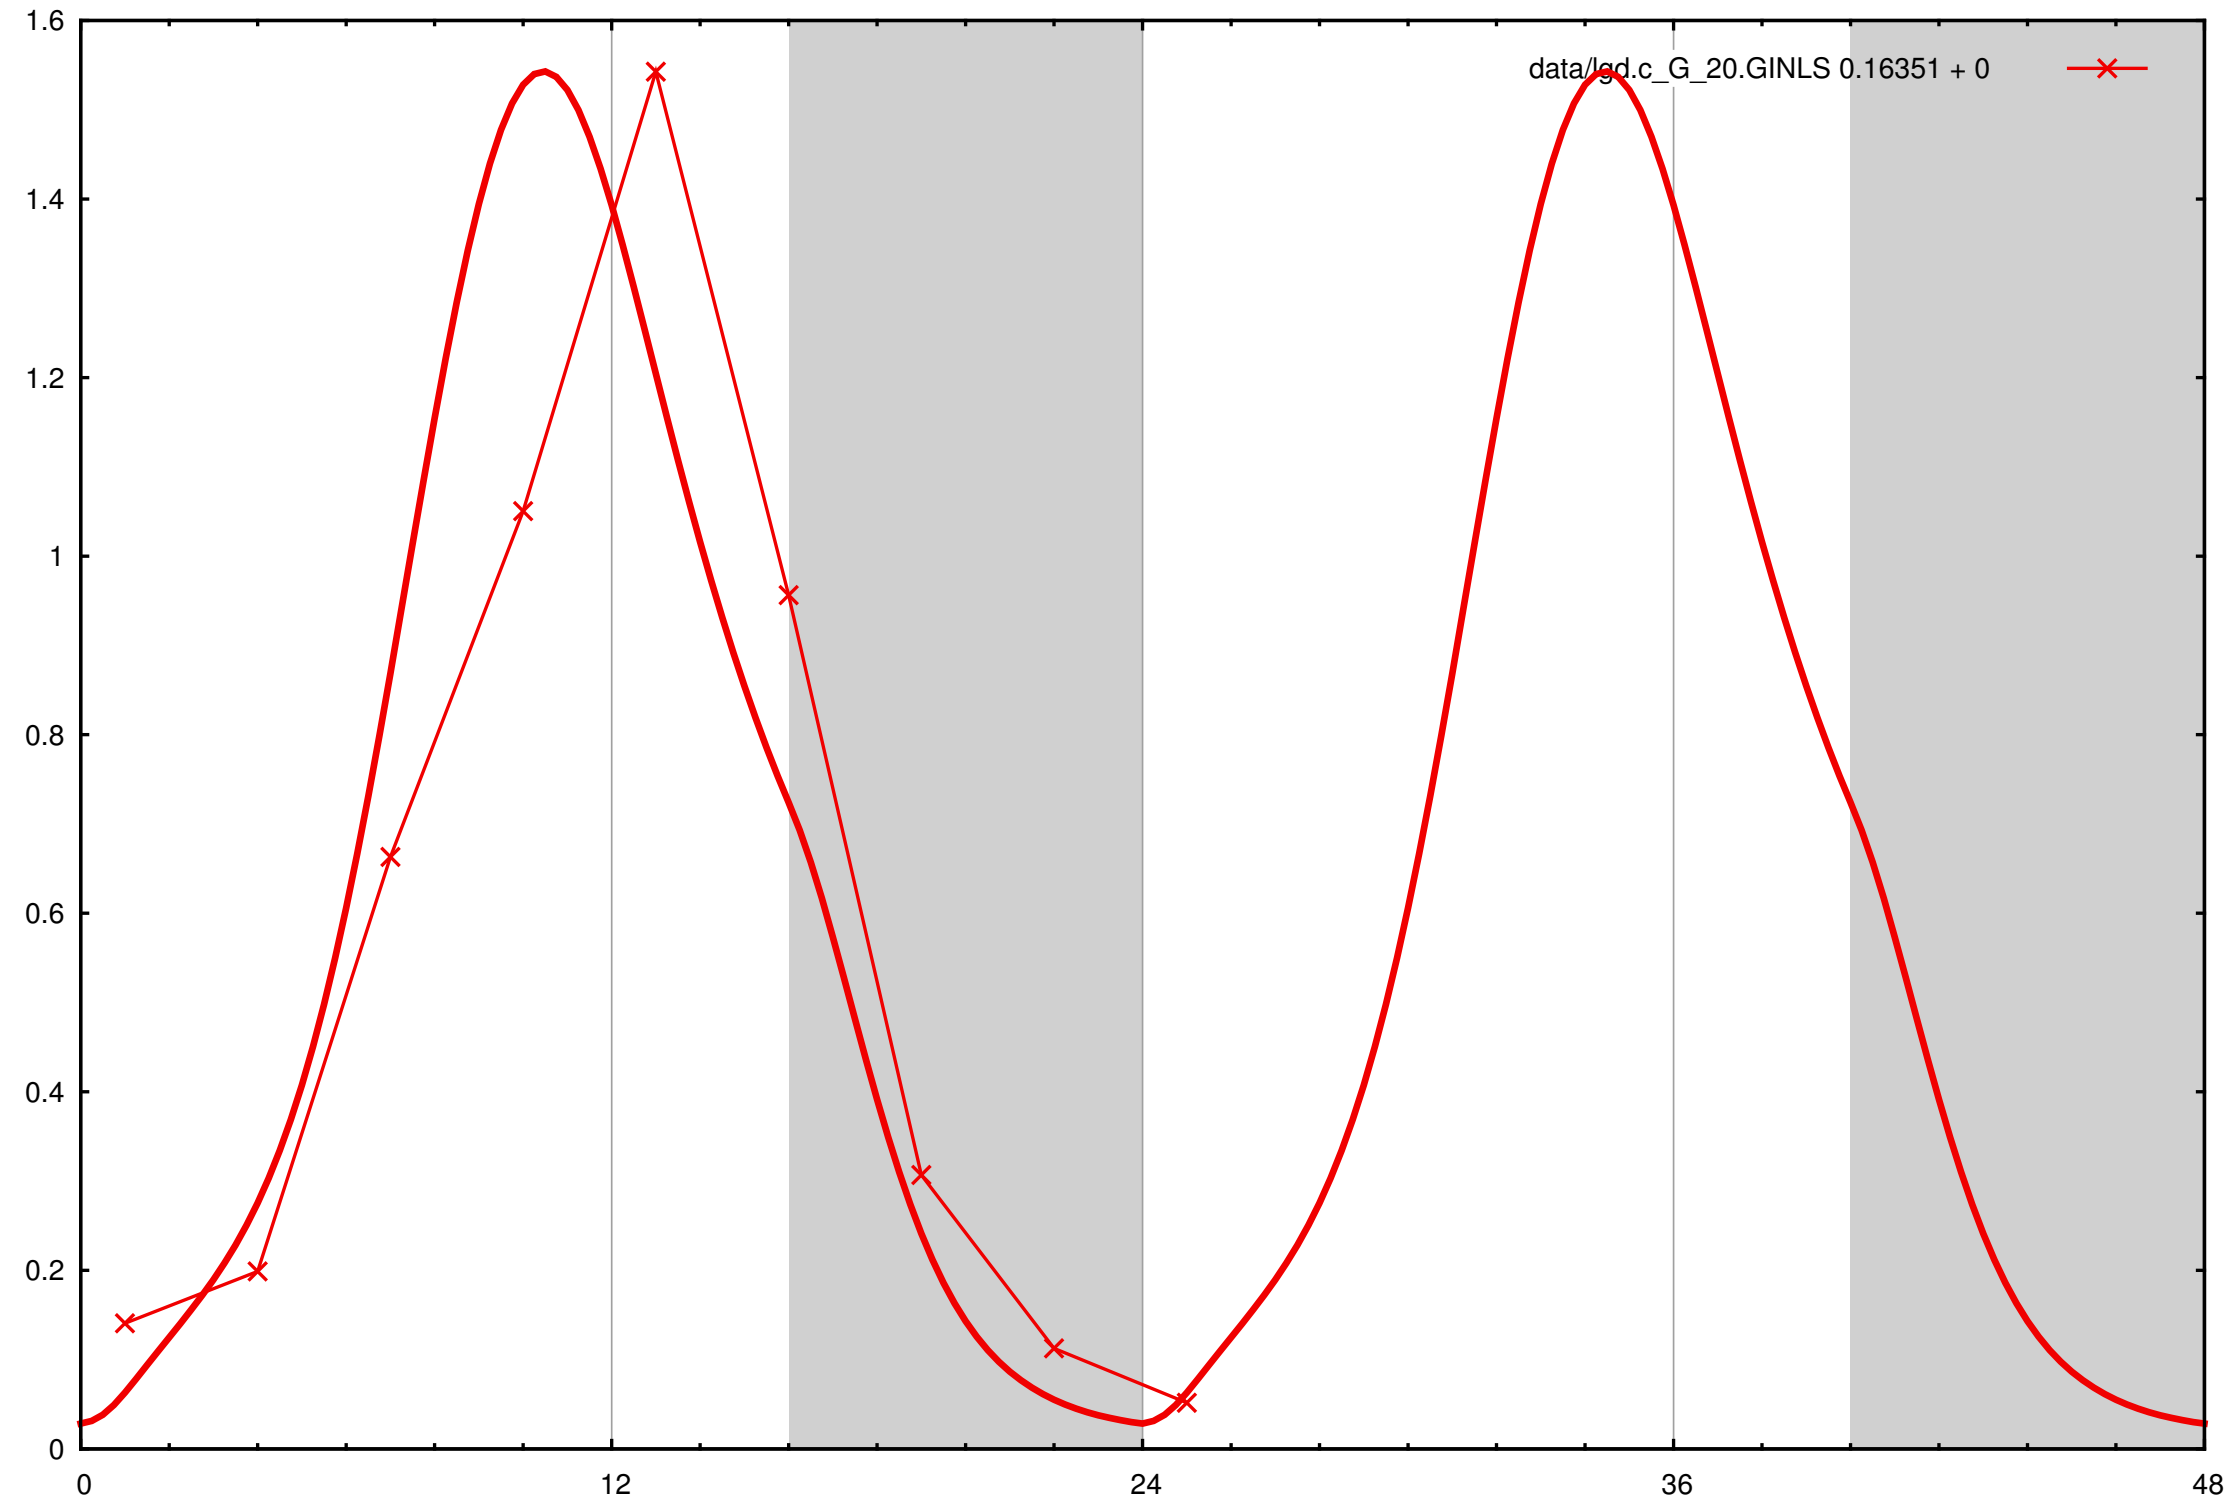

Scale group 221, scost 0

data/lgd.c\_G\_20.GINES 0.158455 + 0

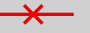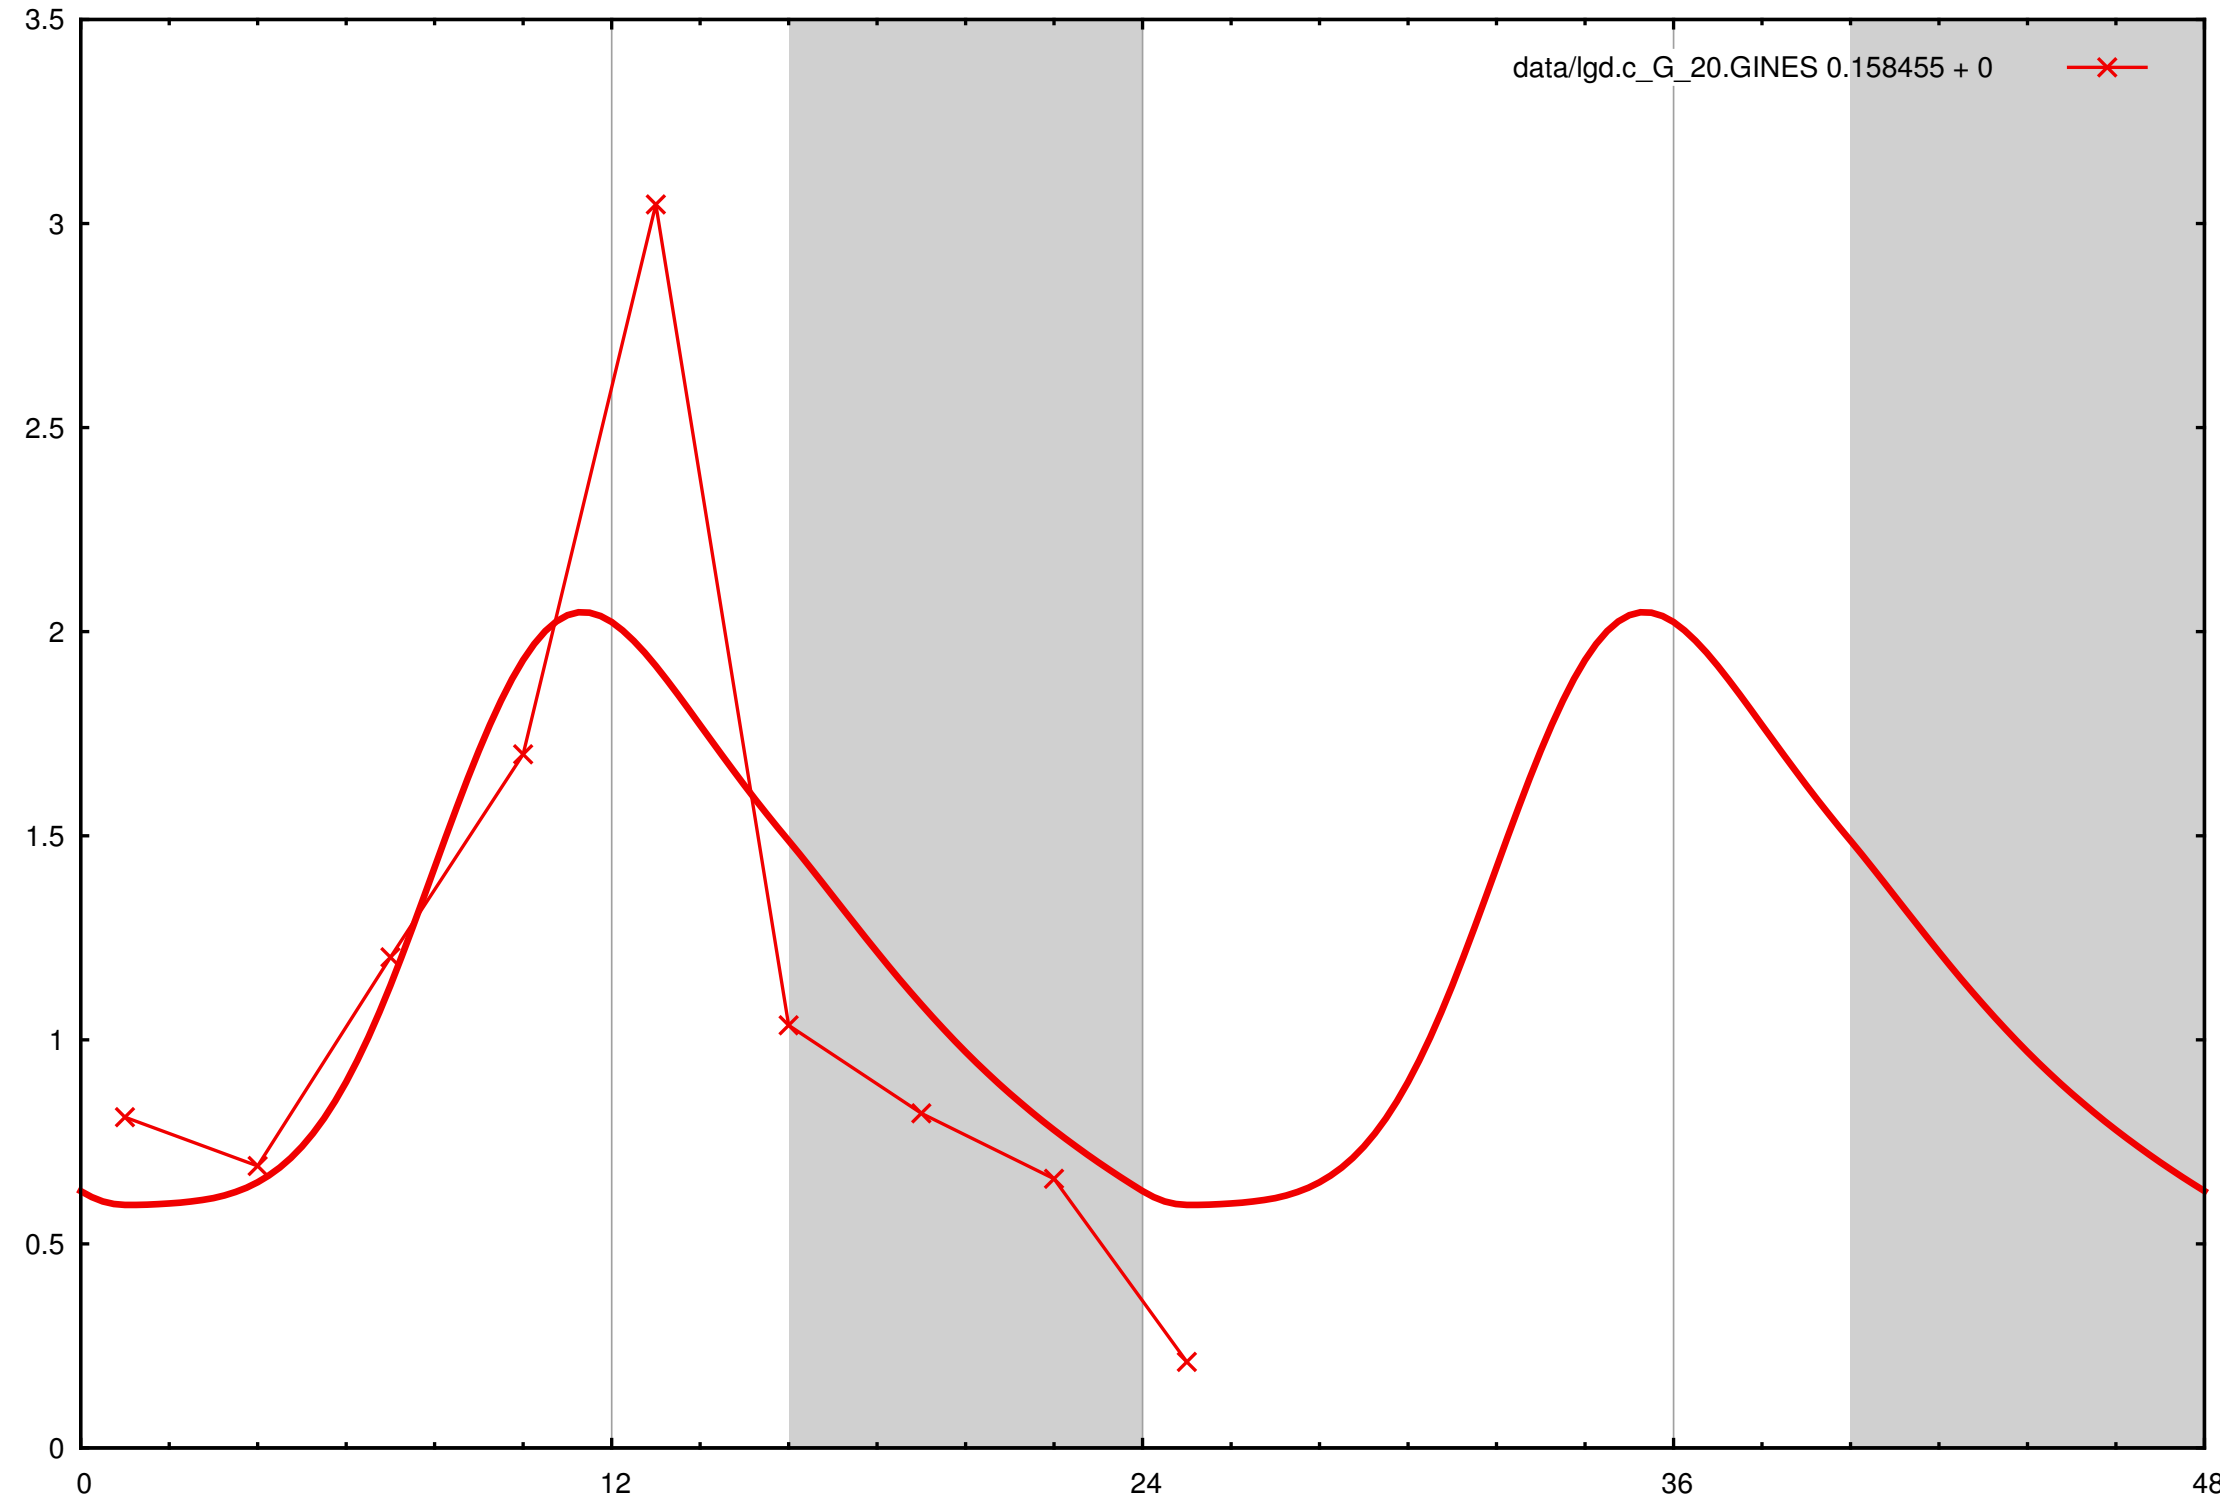

Scale group 222, scost 0.141288

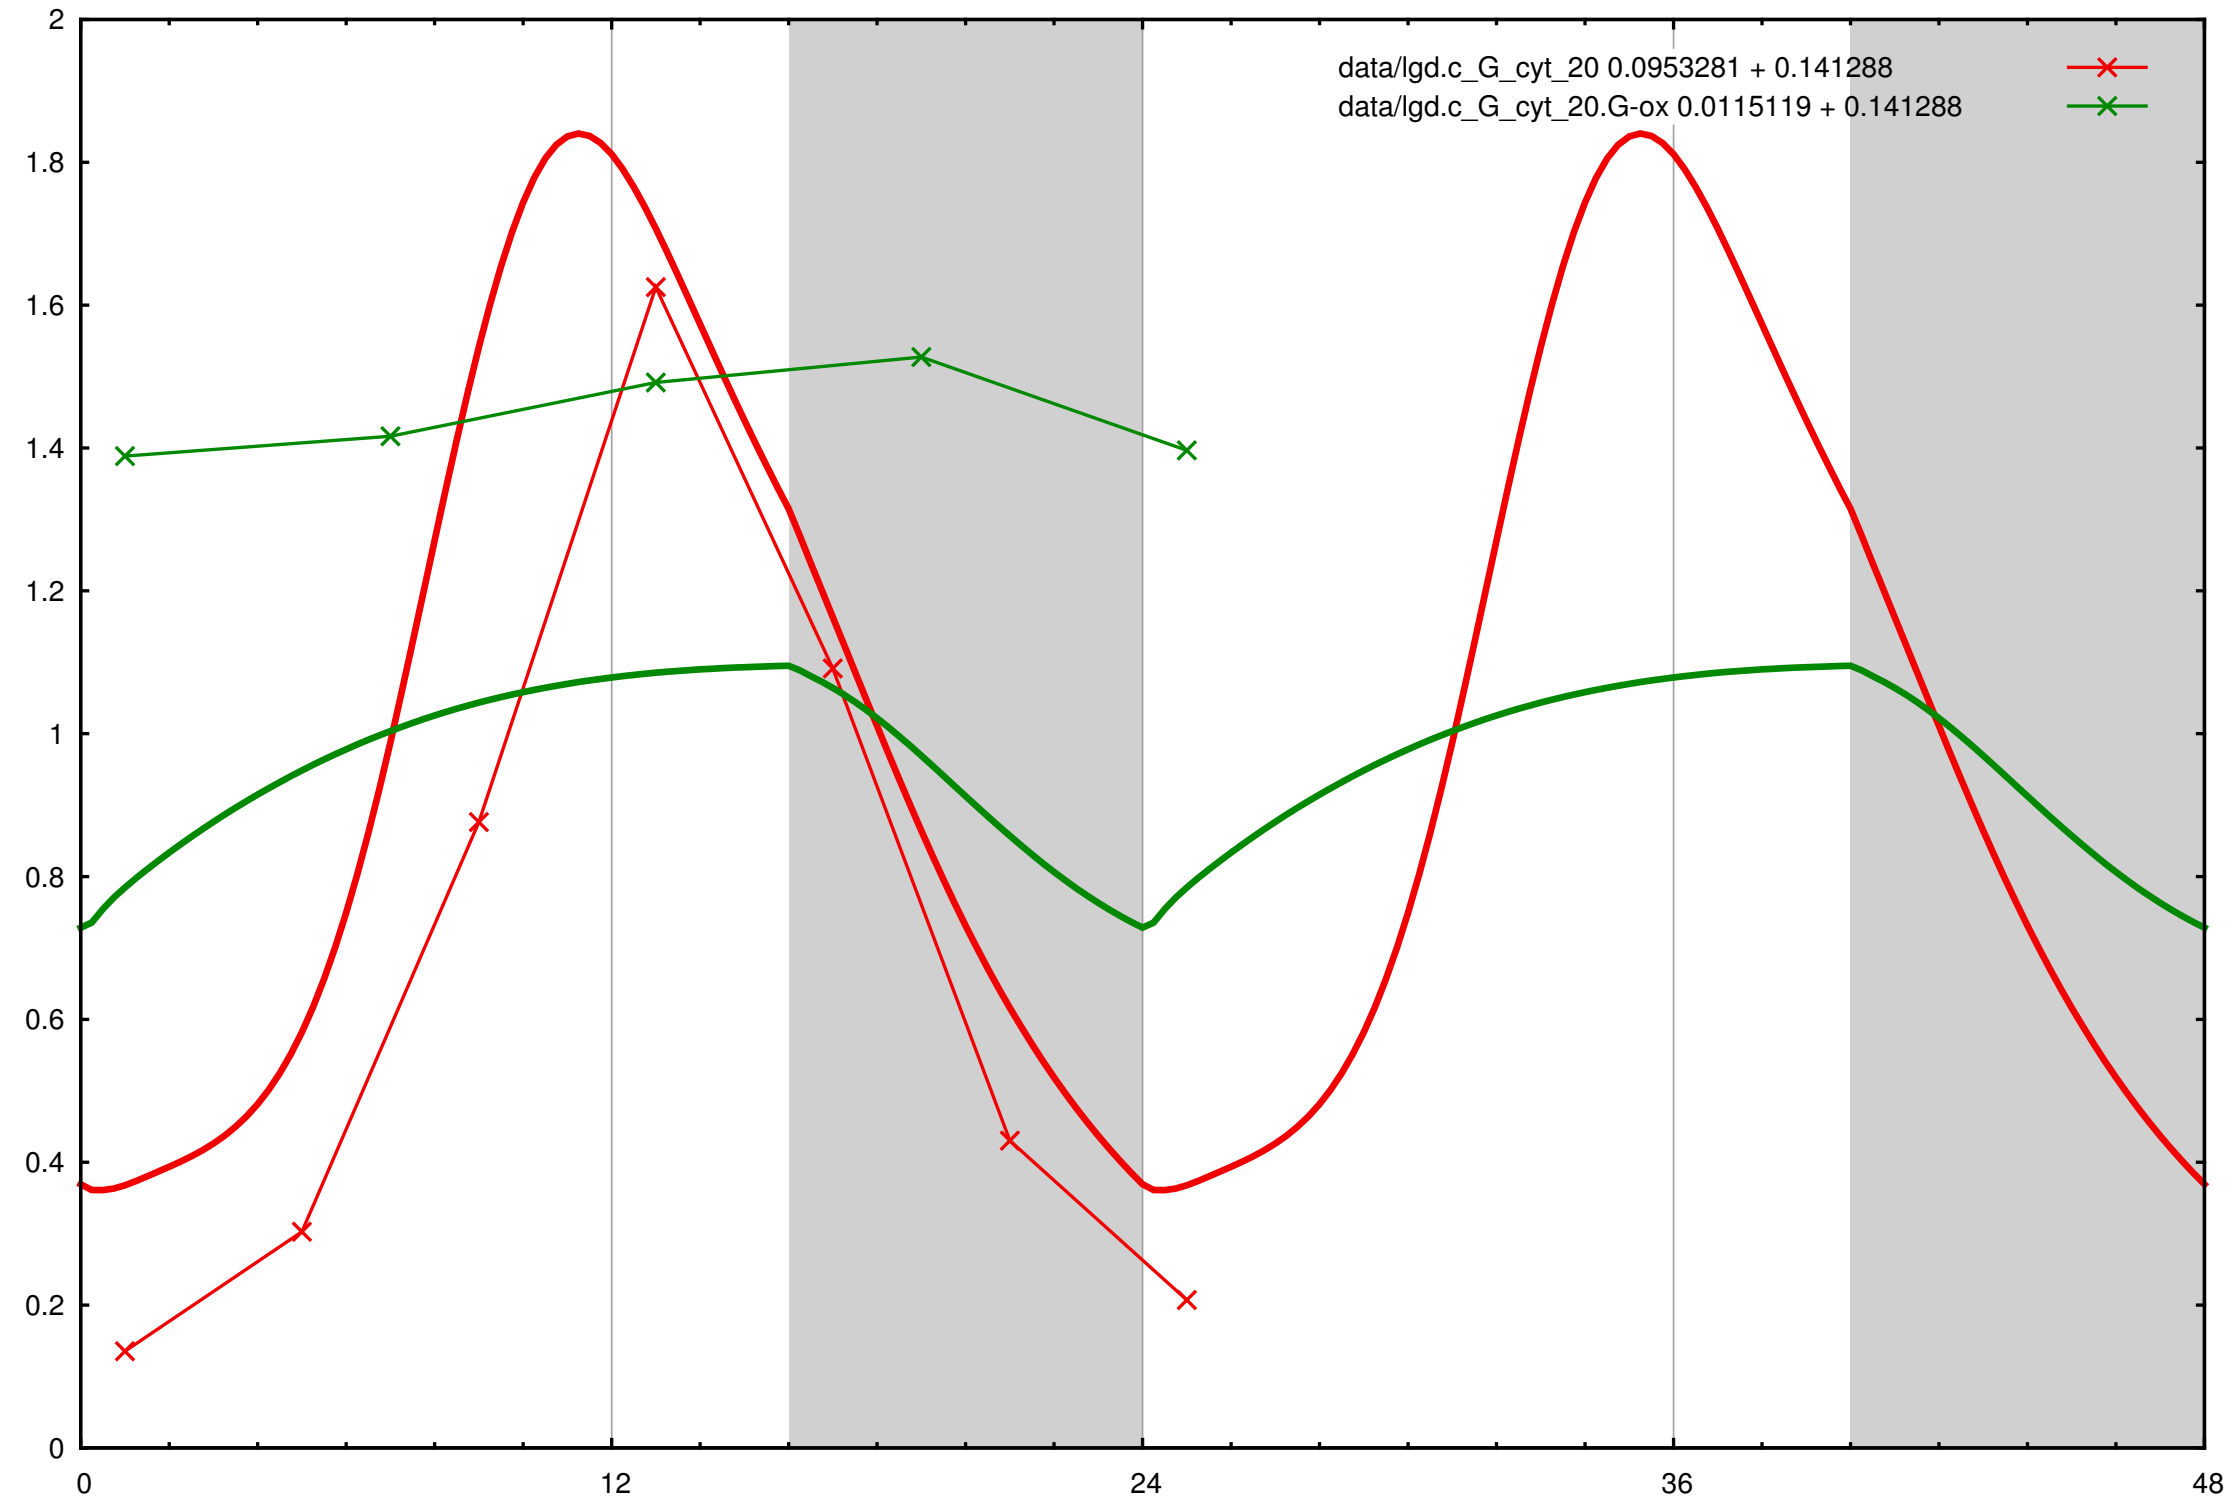

Scale group 223, scost 0.151698

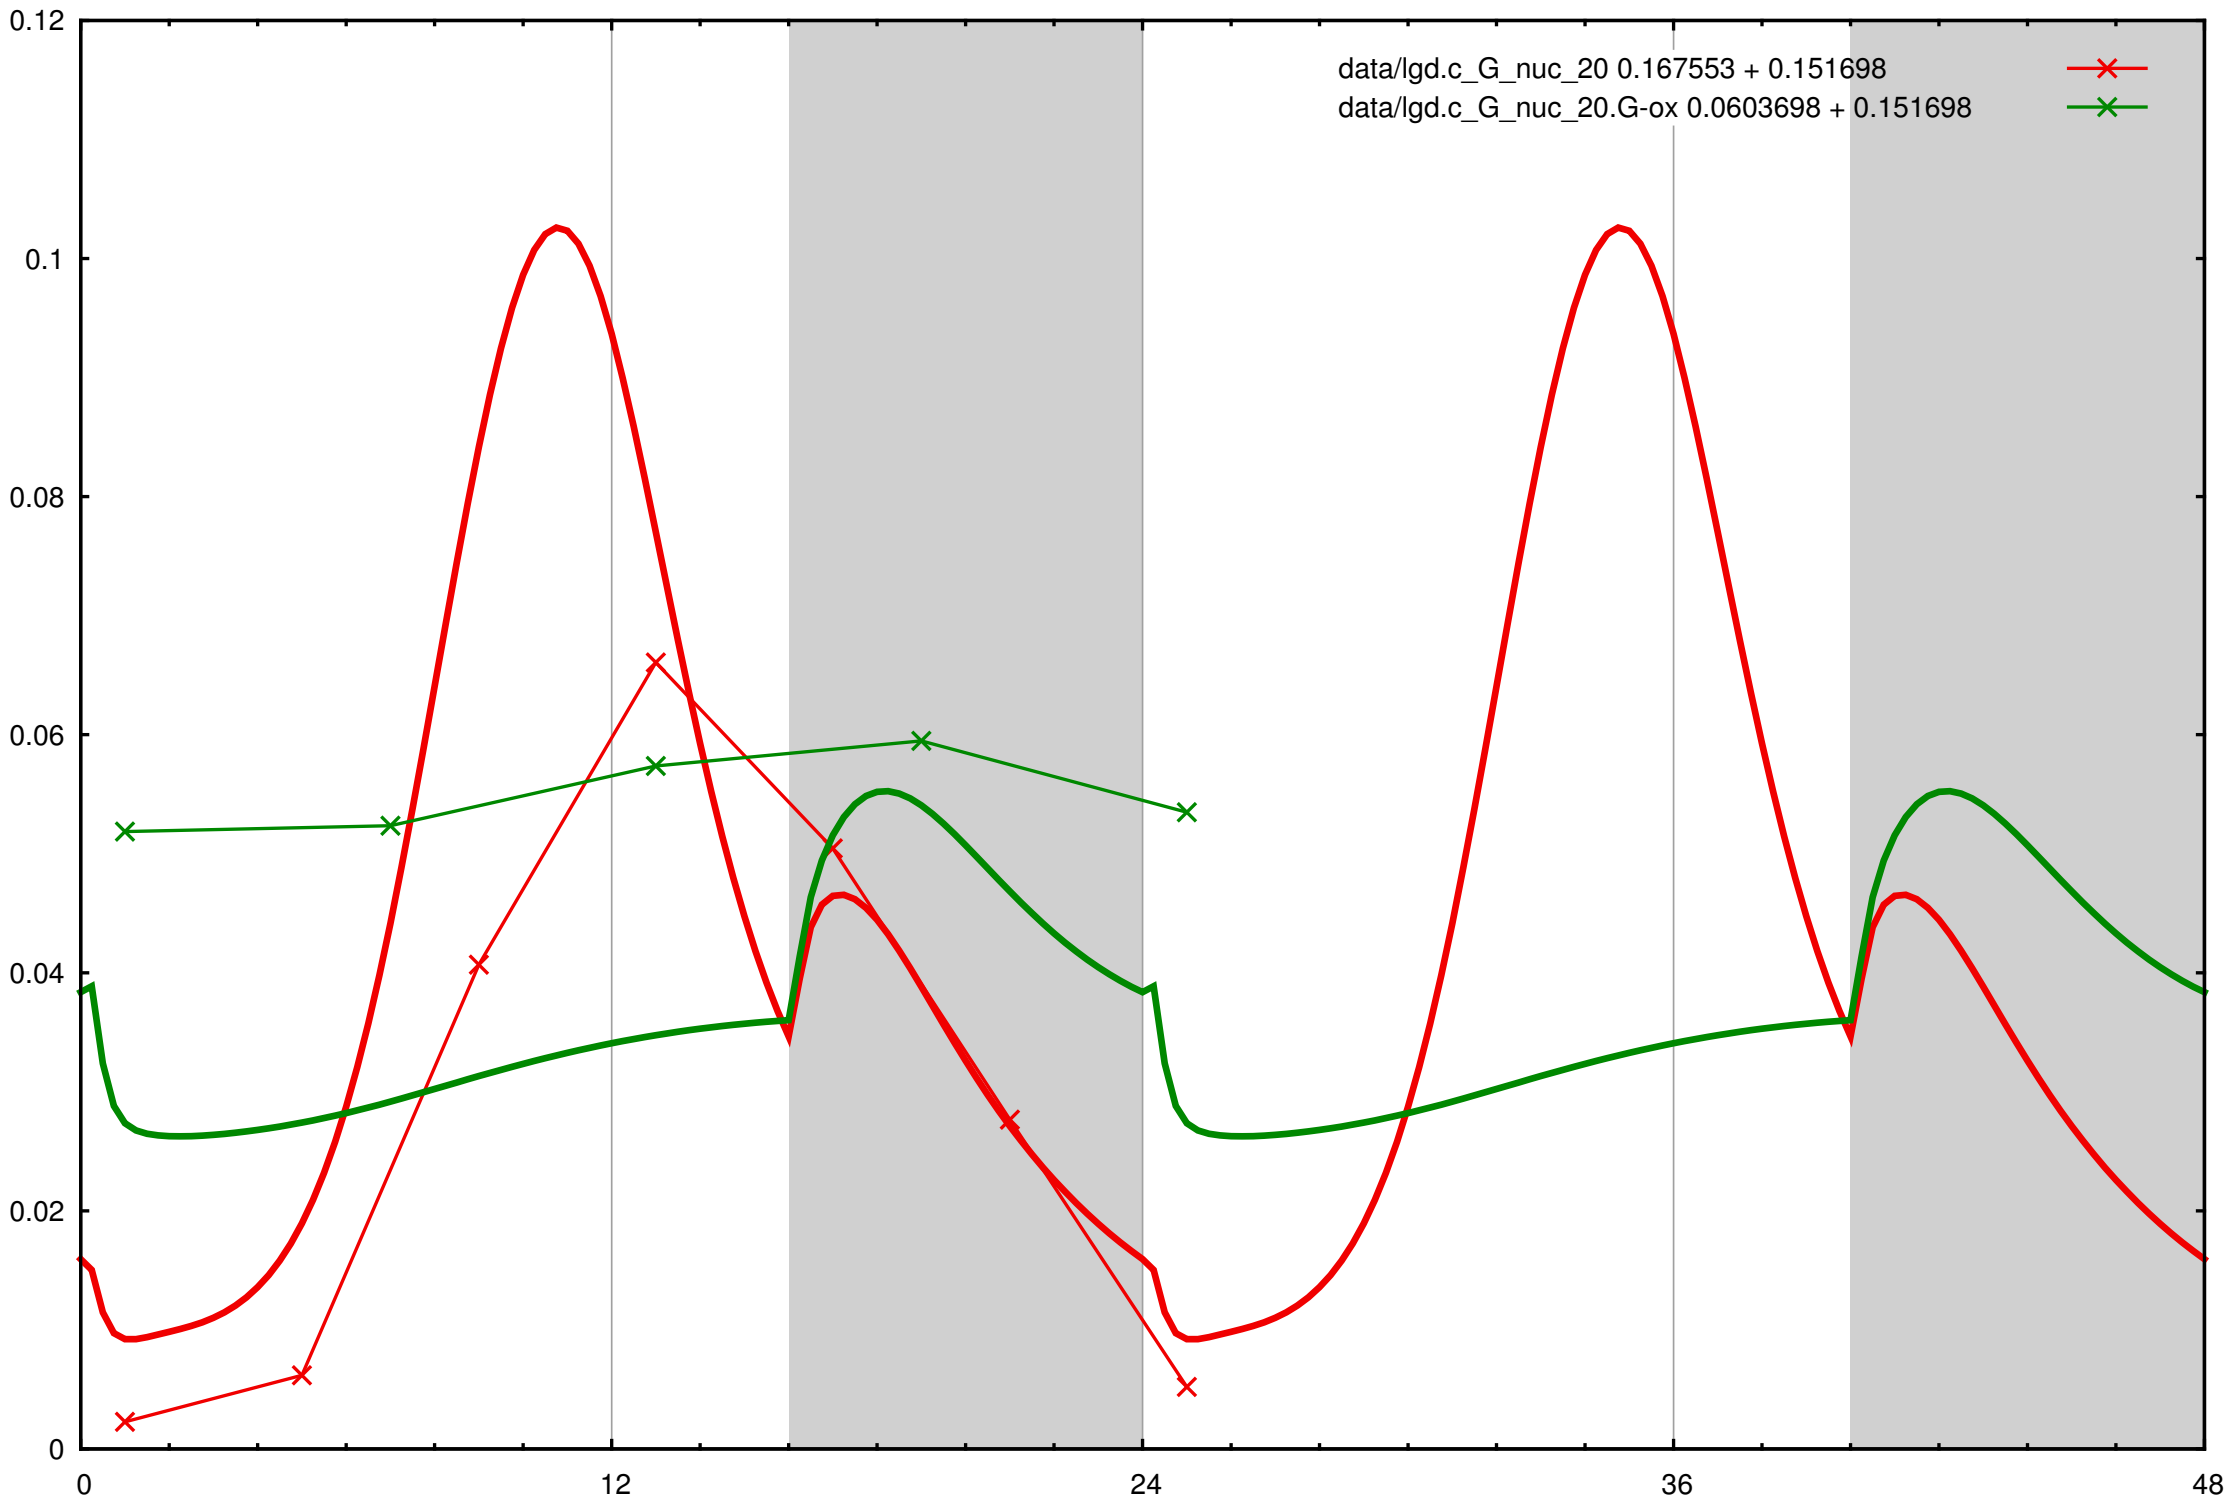

Scale group 224, scost 0.148386

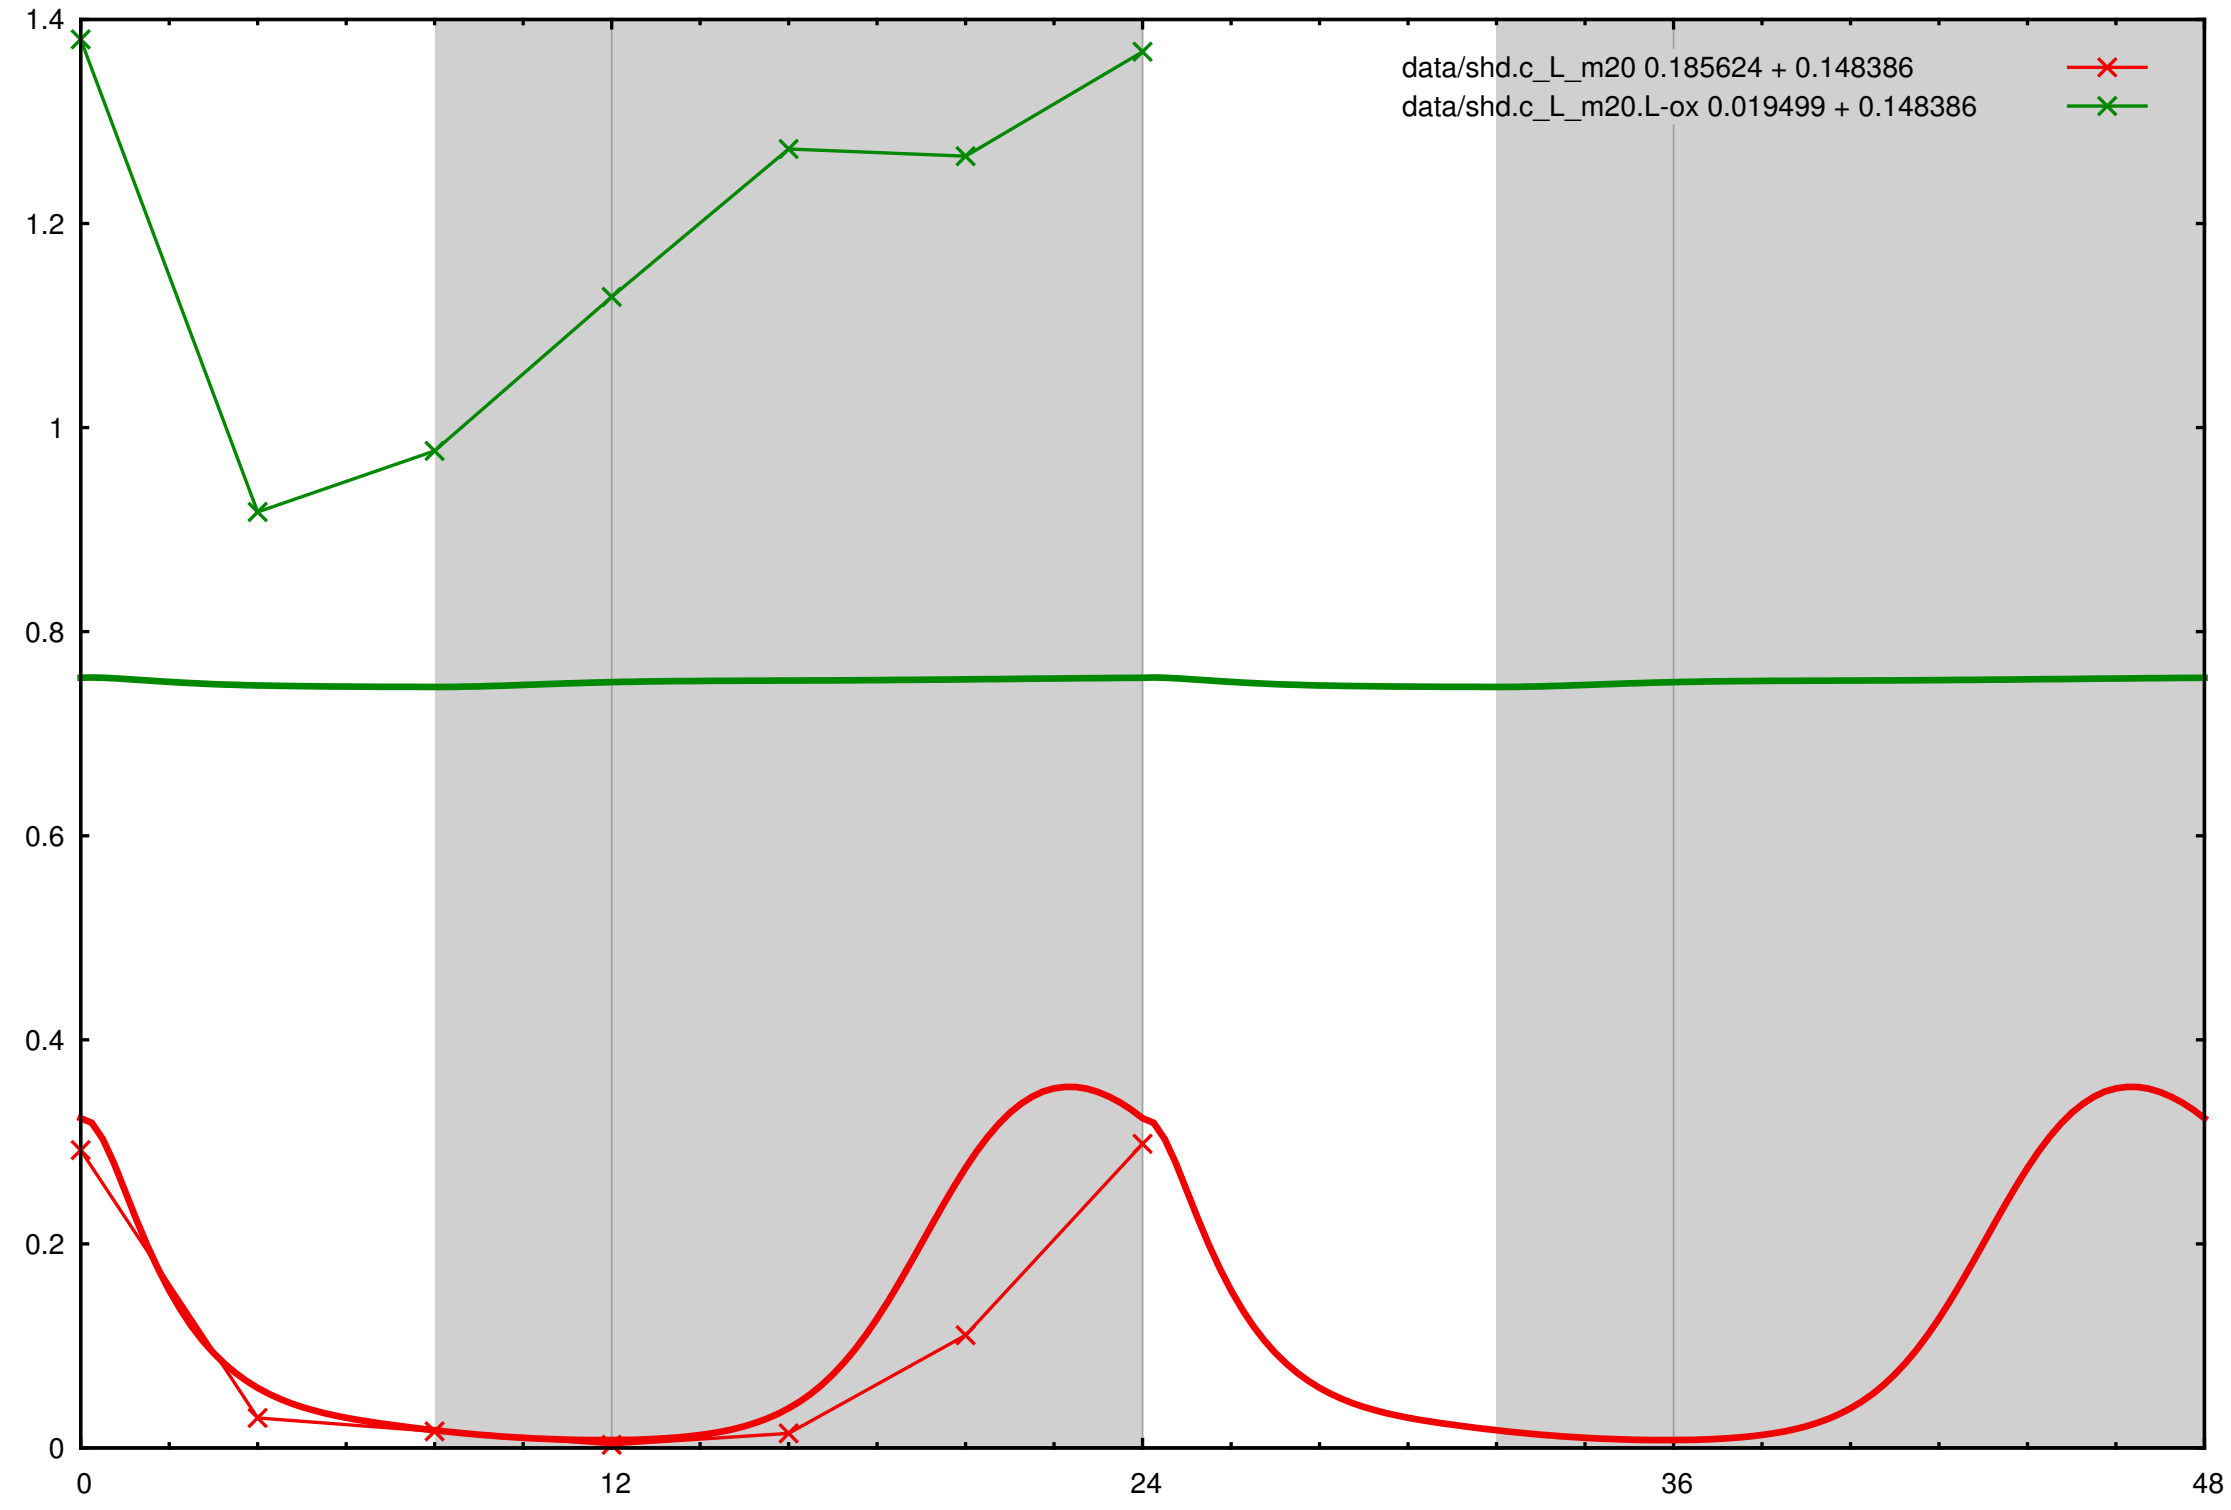



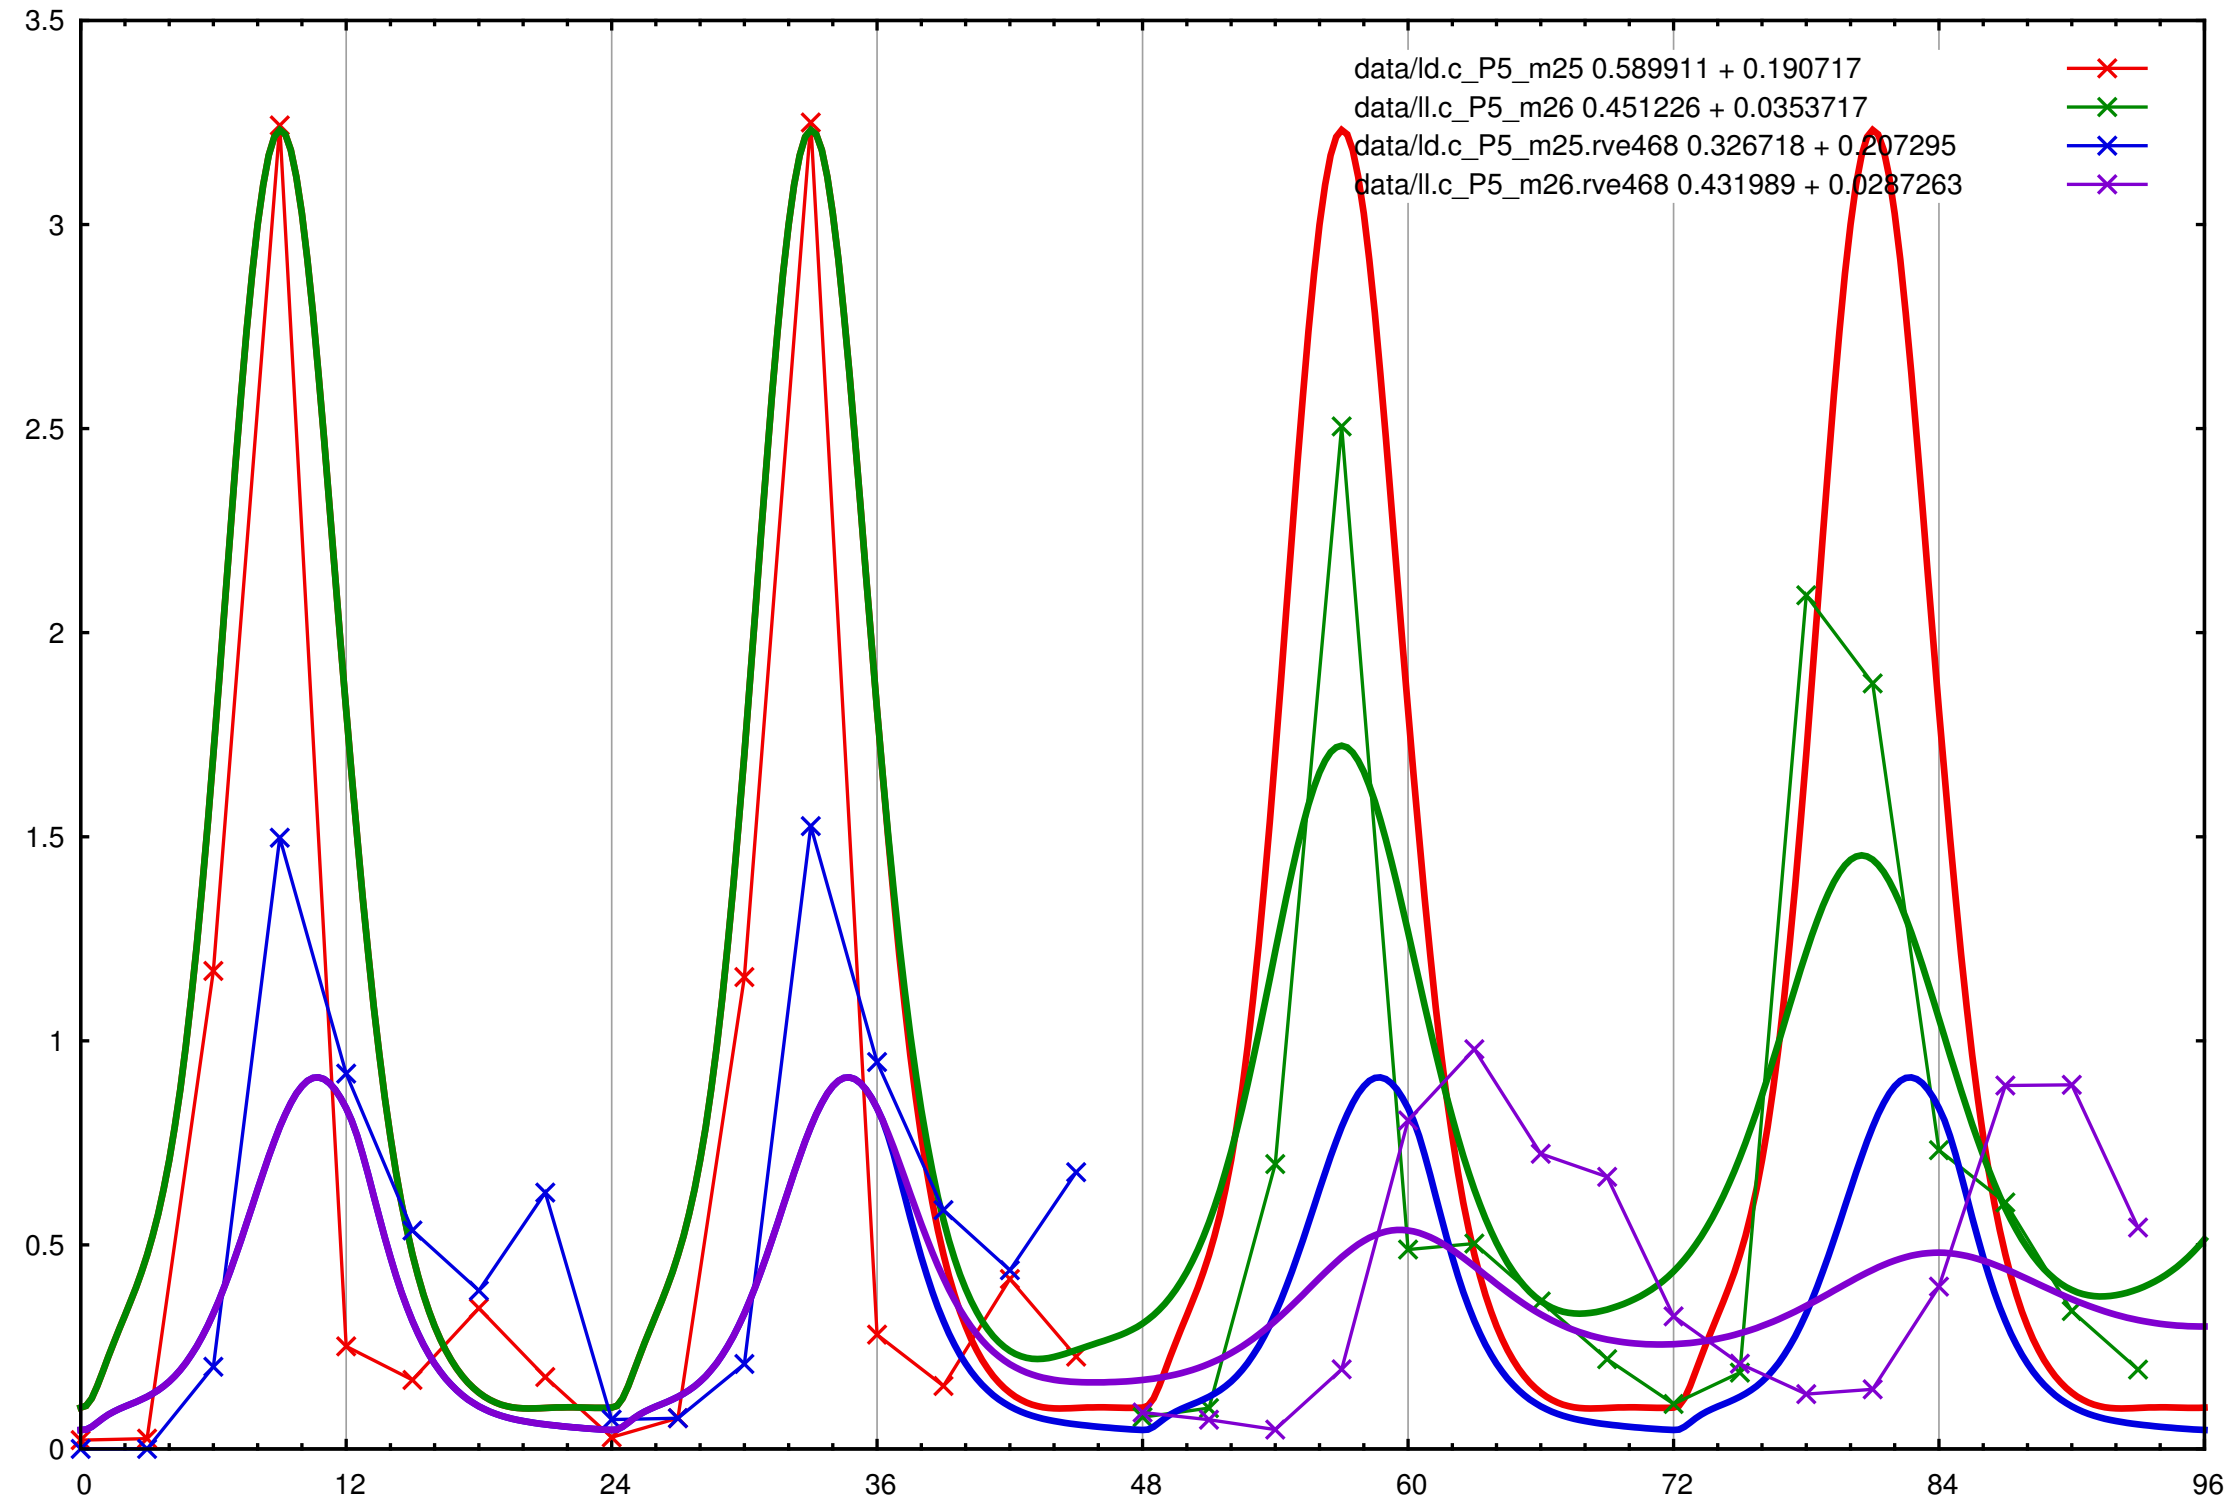

Scale group 226, scost 0.0389669

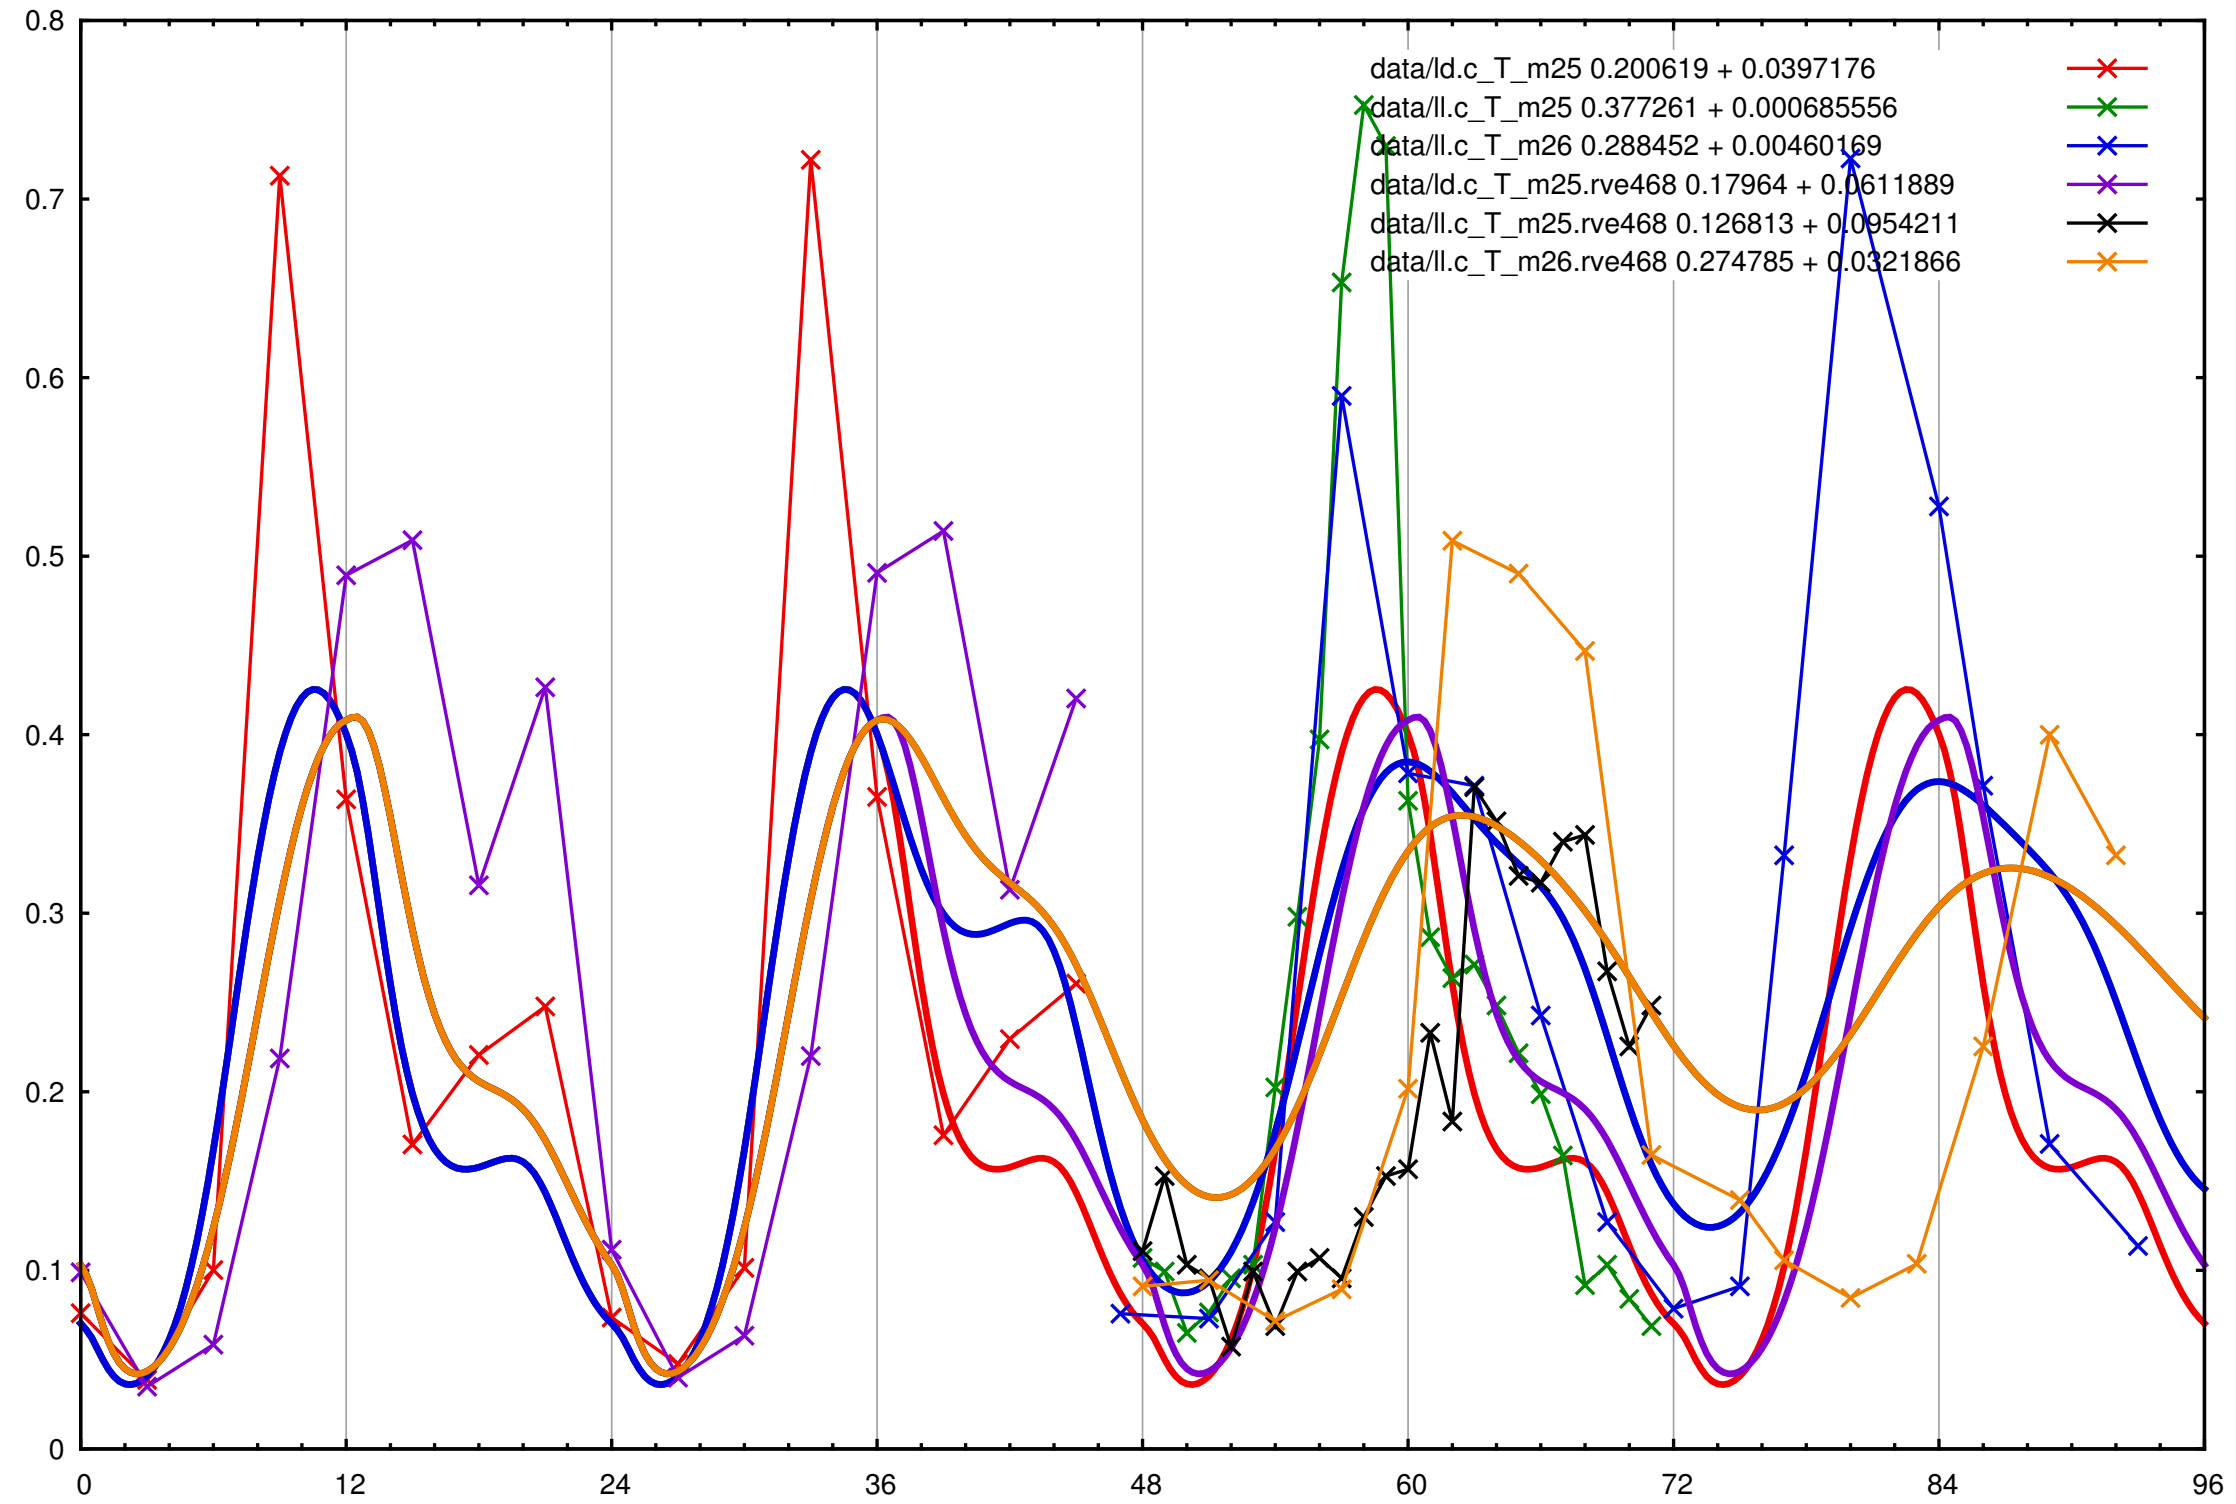

Scale group 227, scost 0.18503

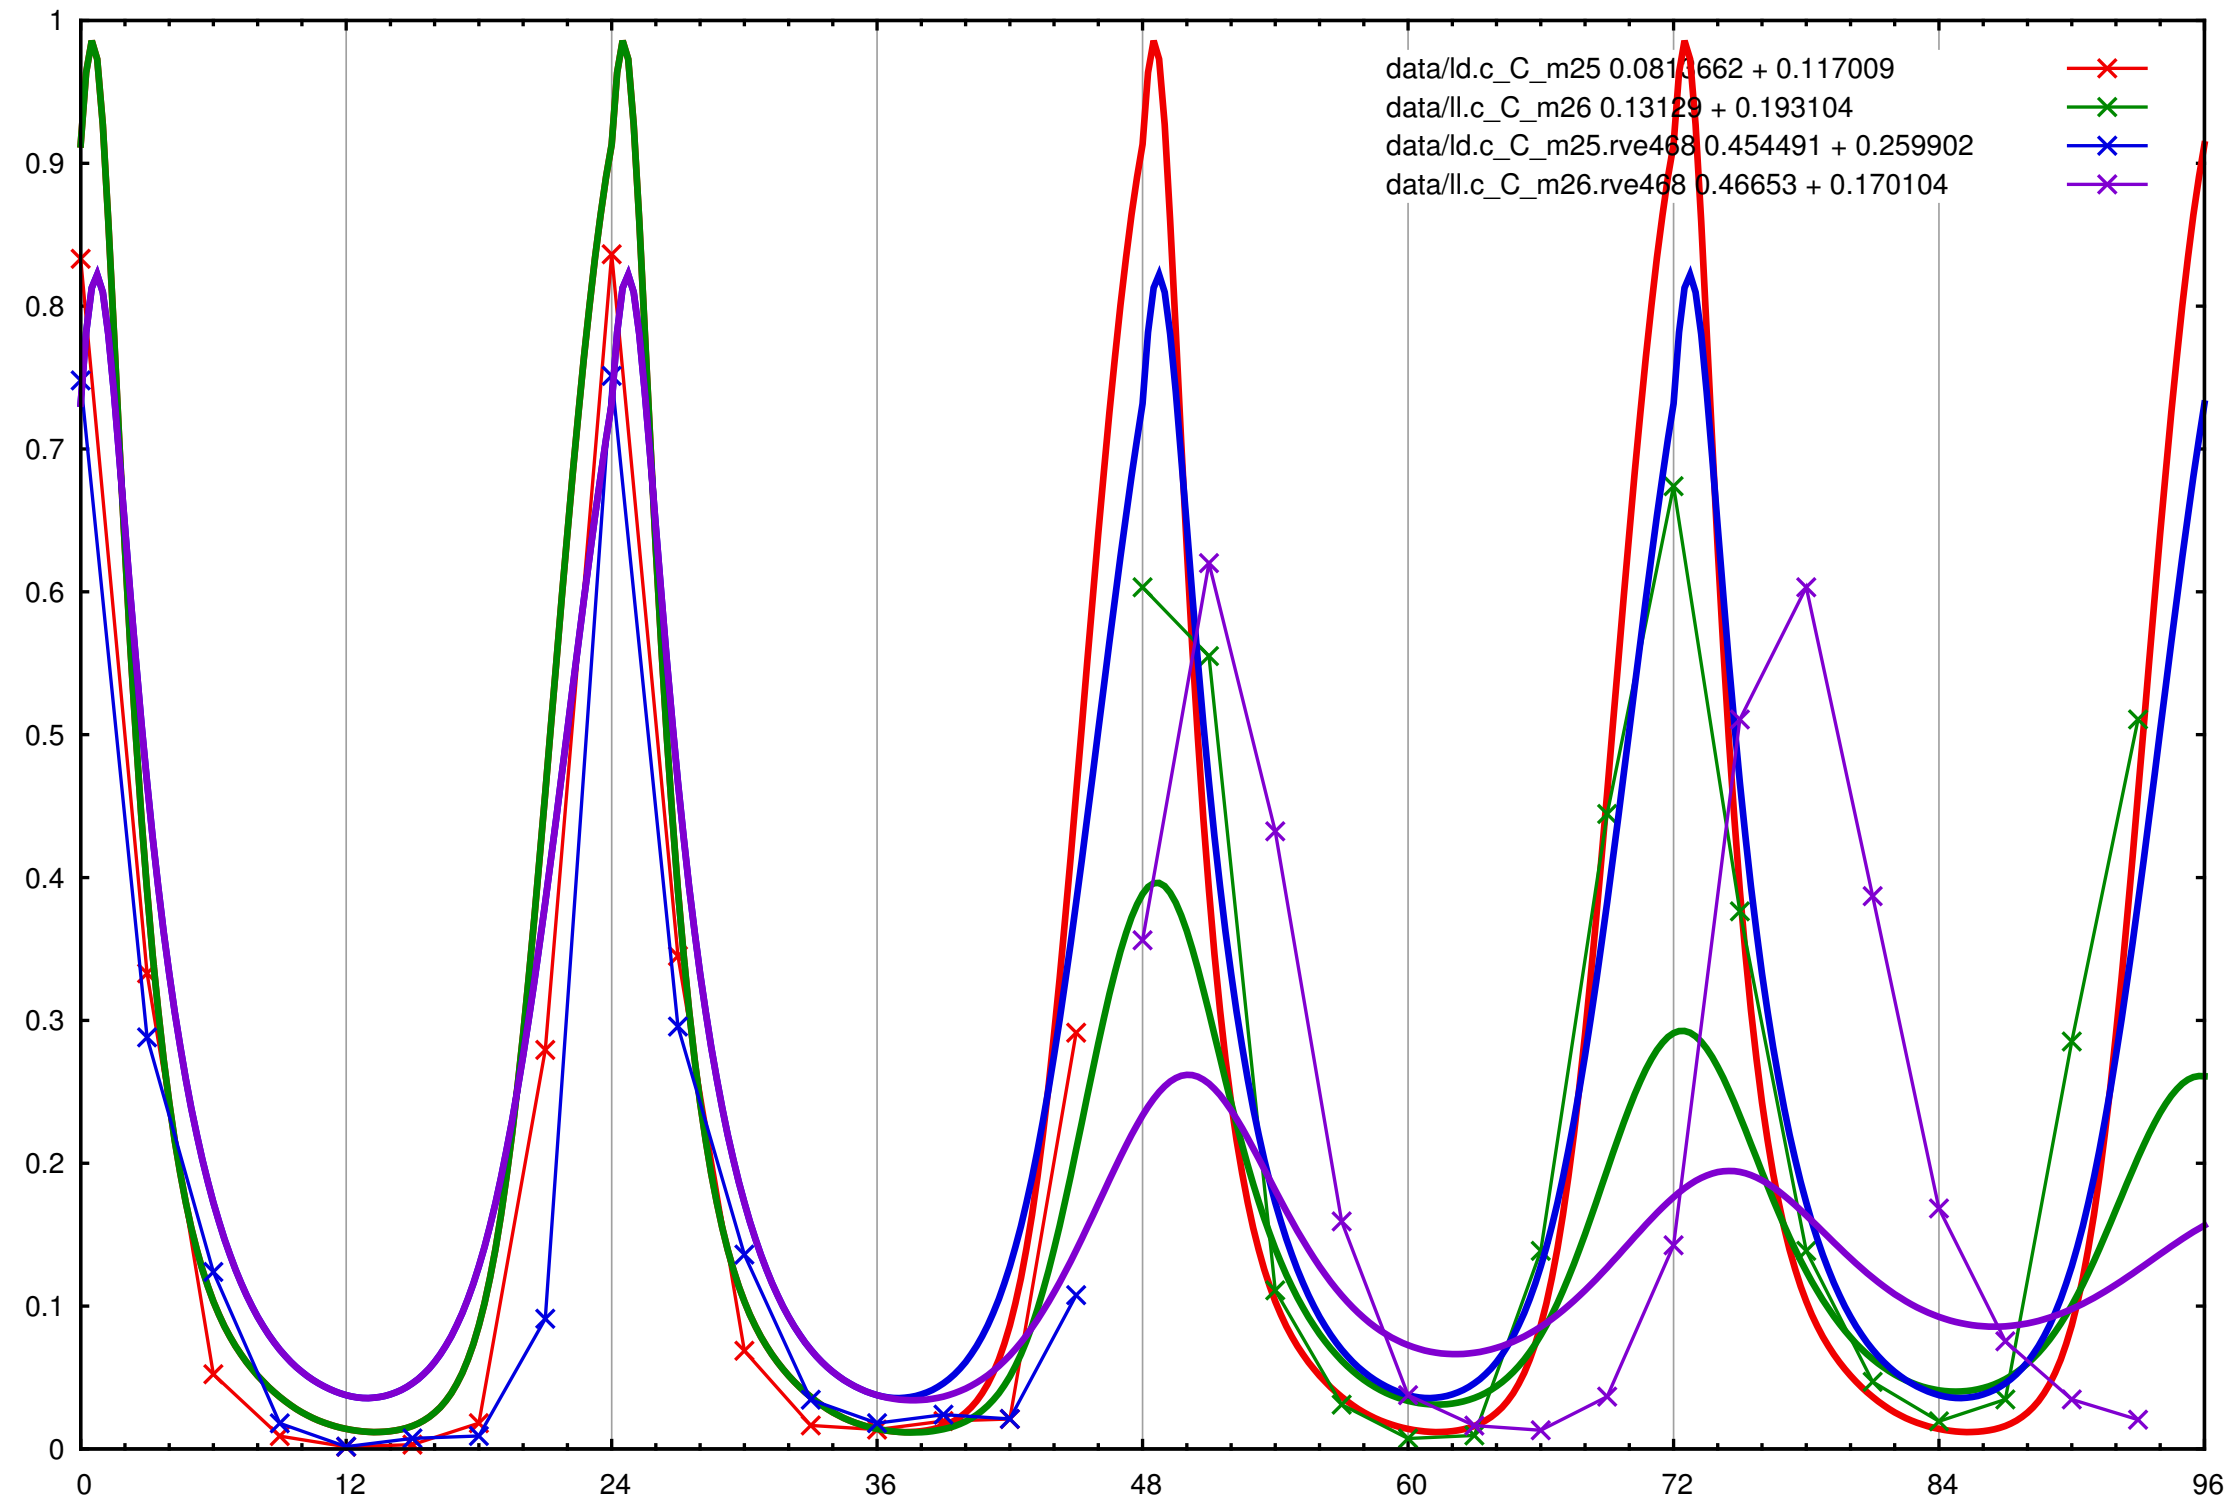

Scale group 228, scost 0.162541

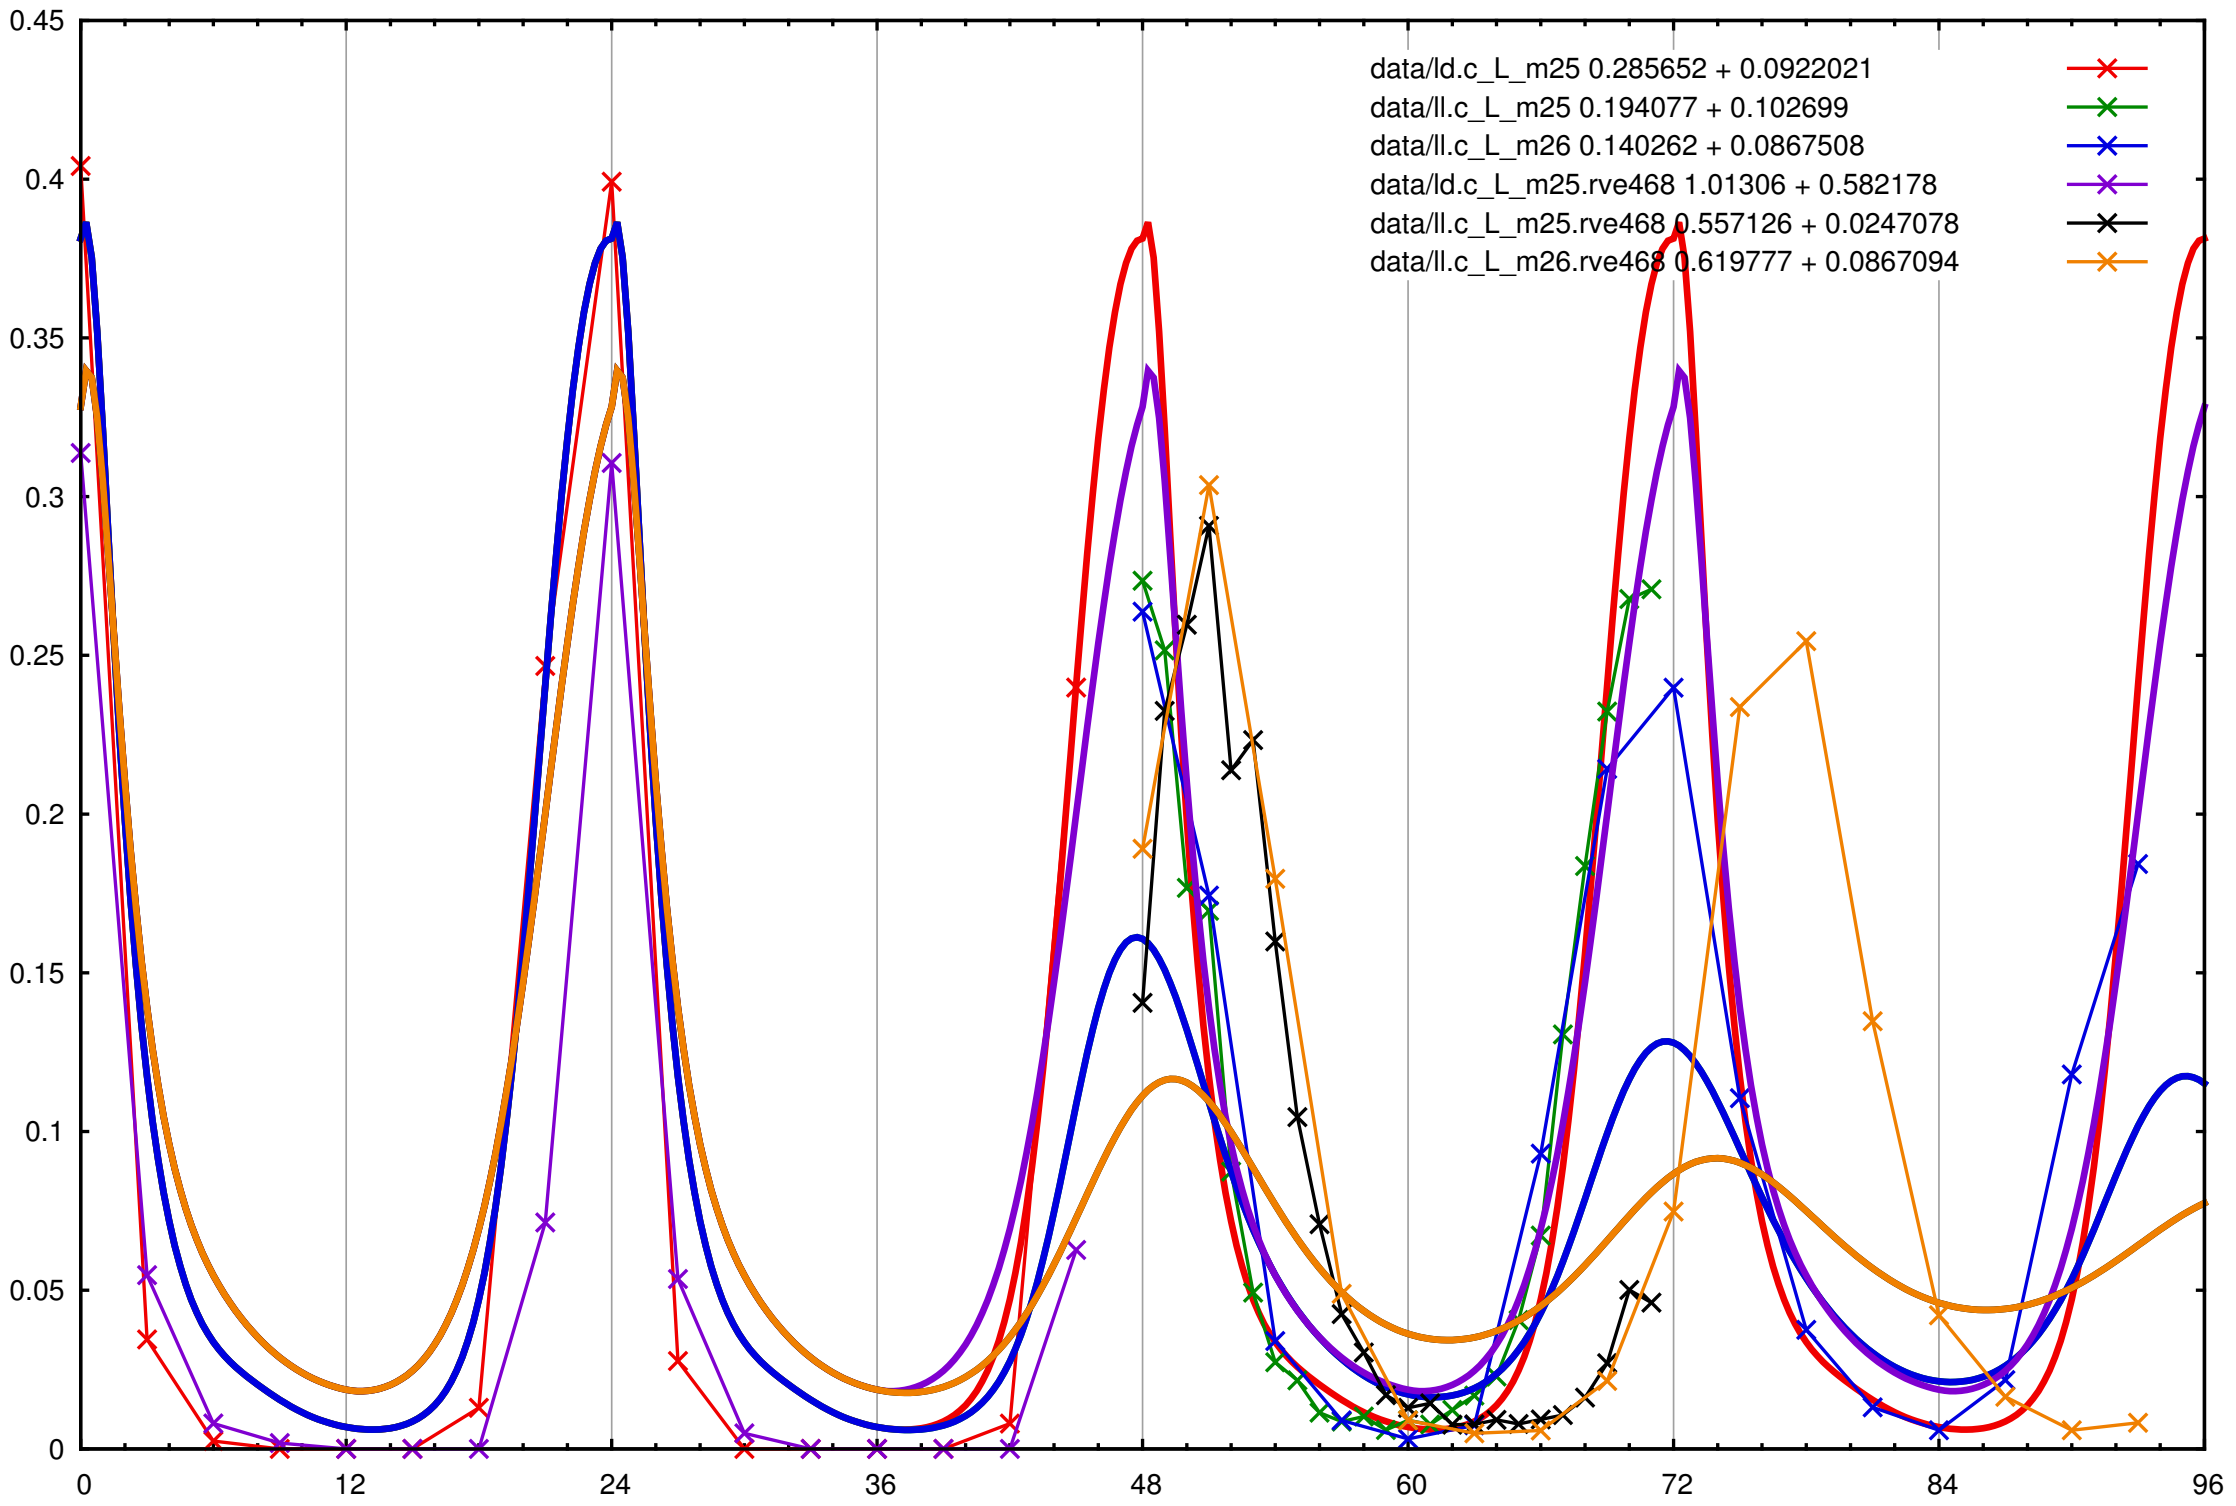

Scale group 229, scost 0.154125

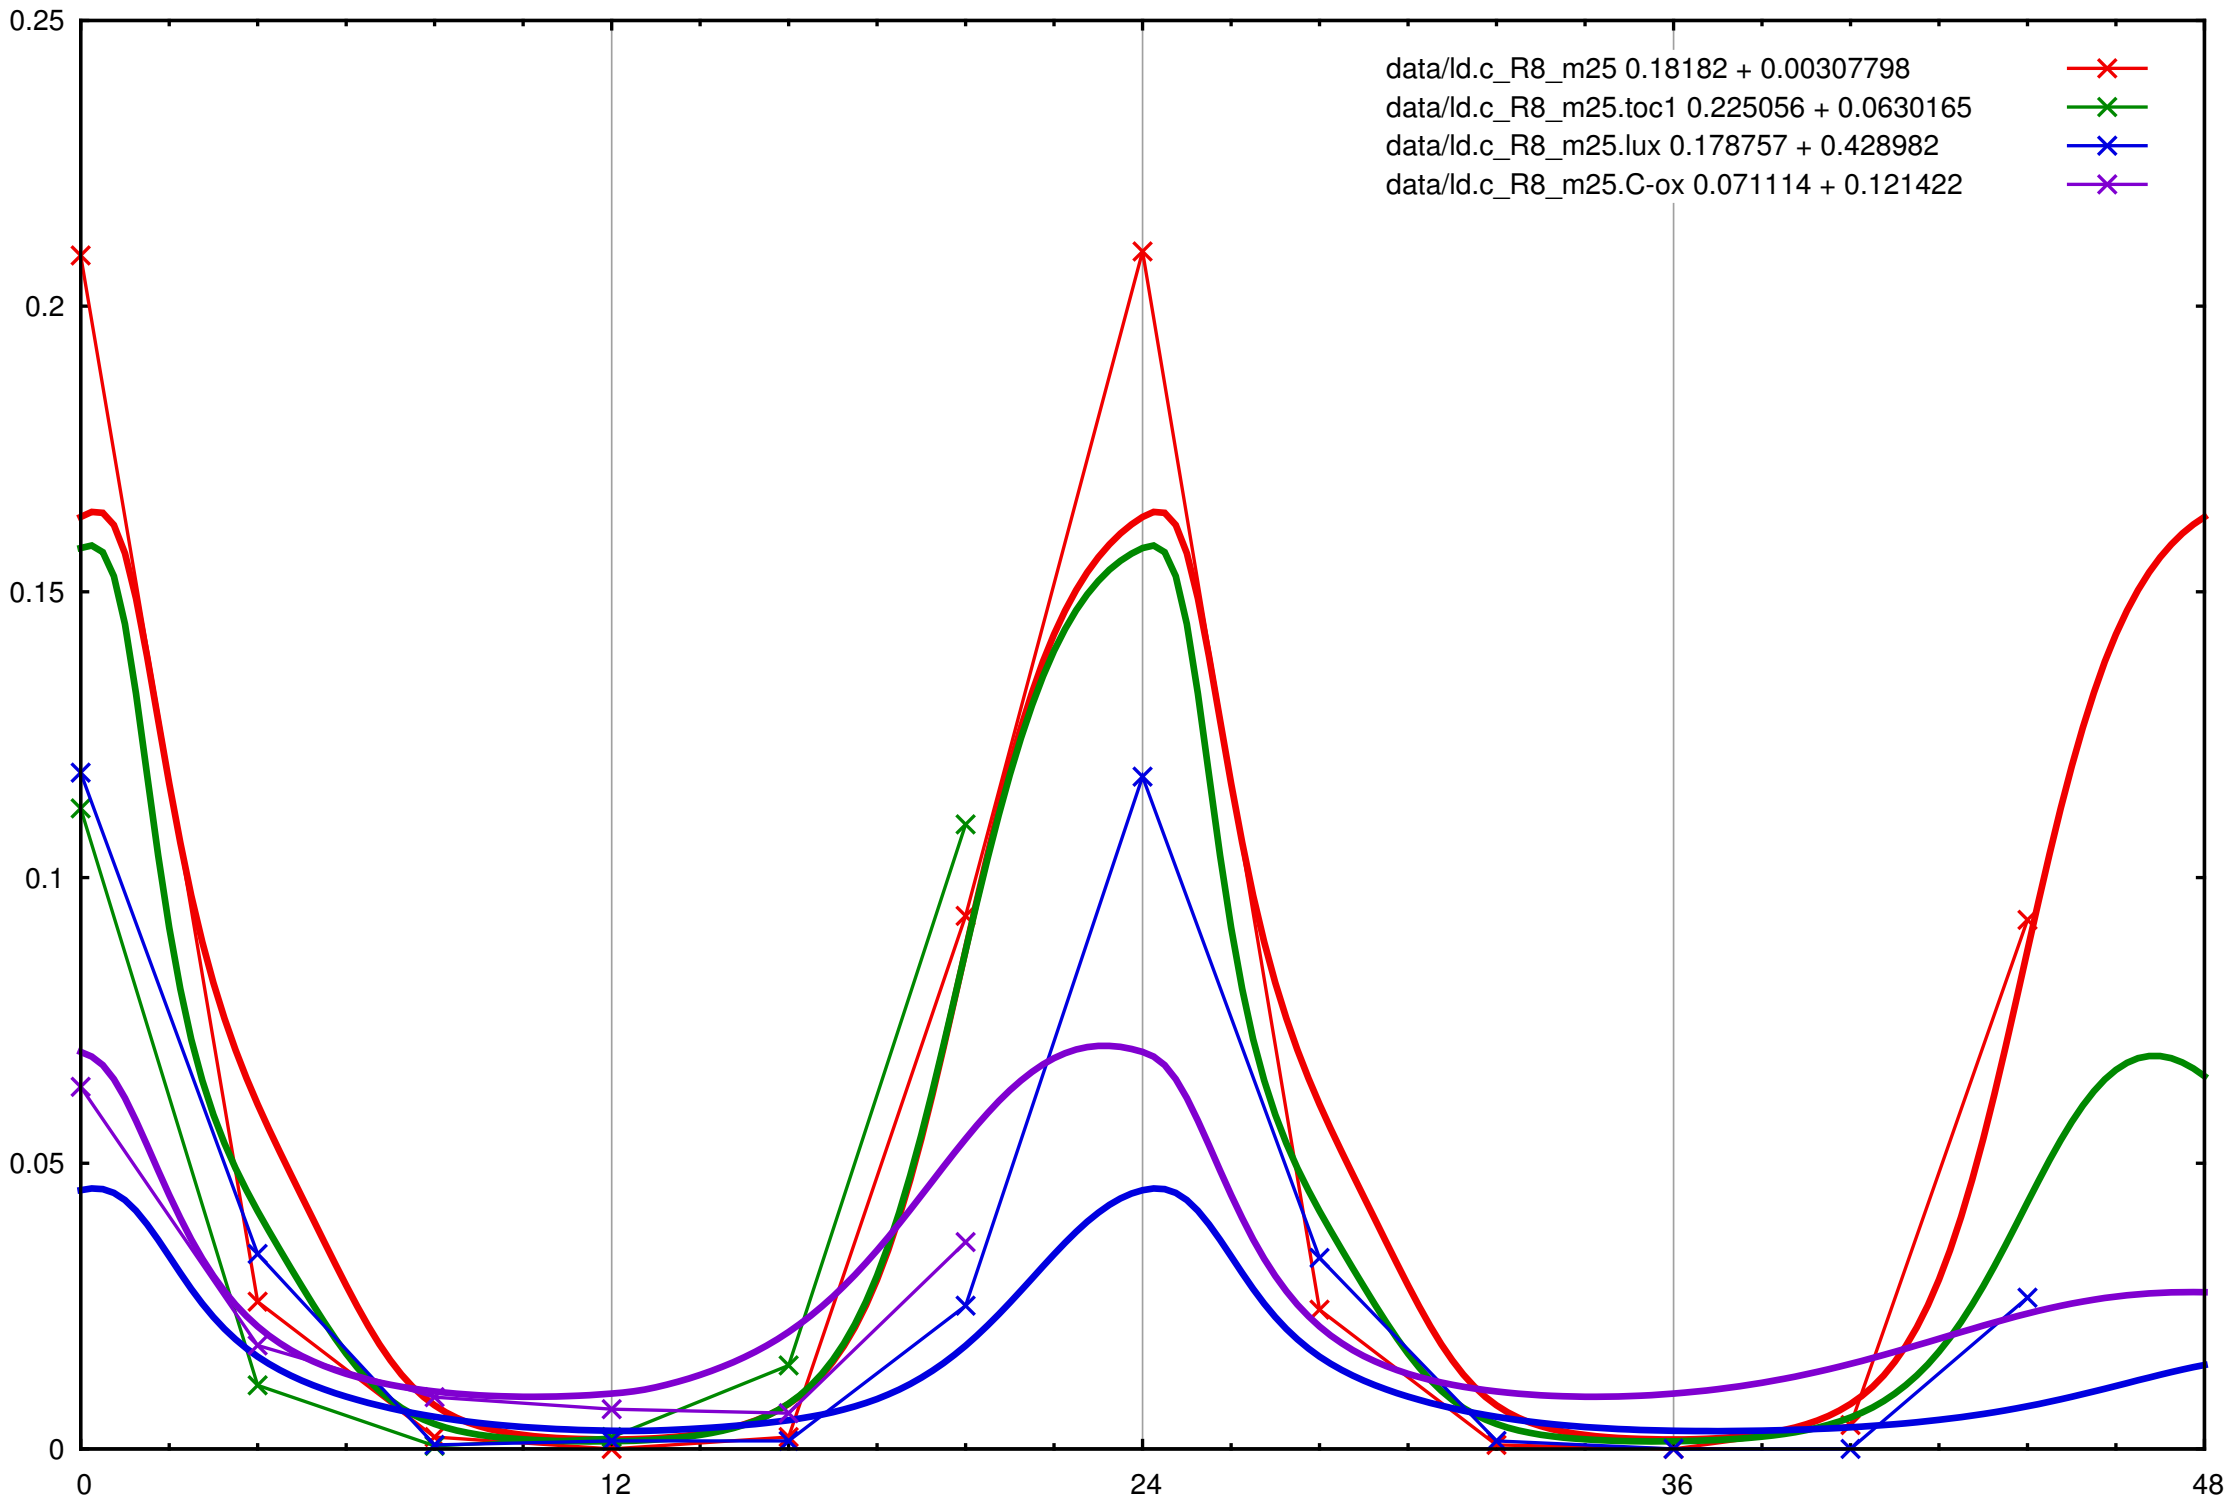

Scale group 230, scost 64.279

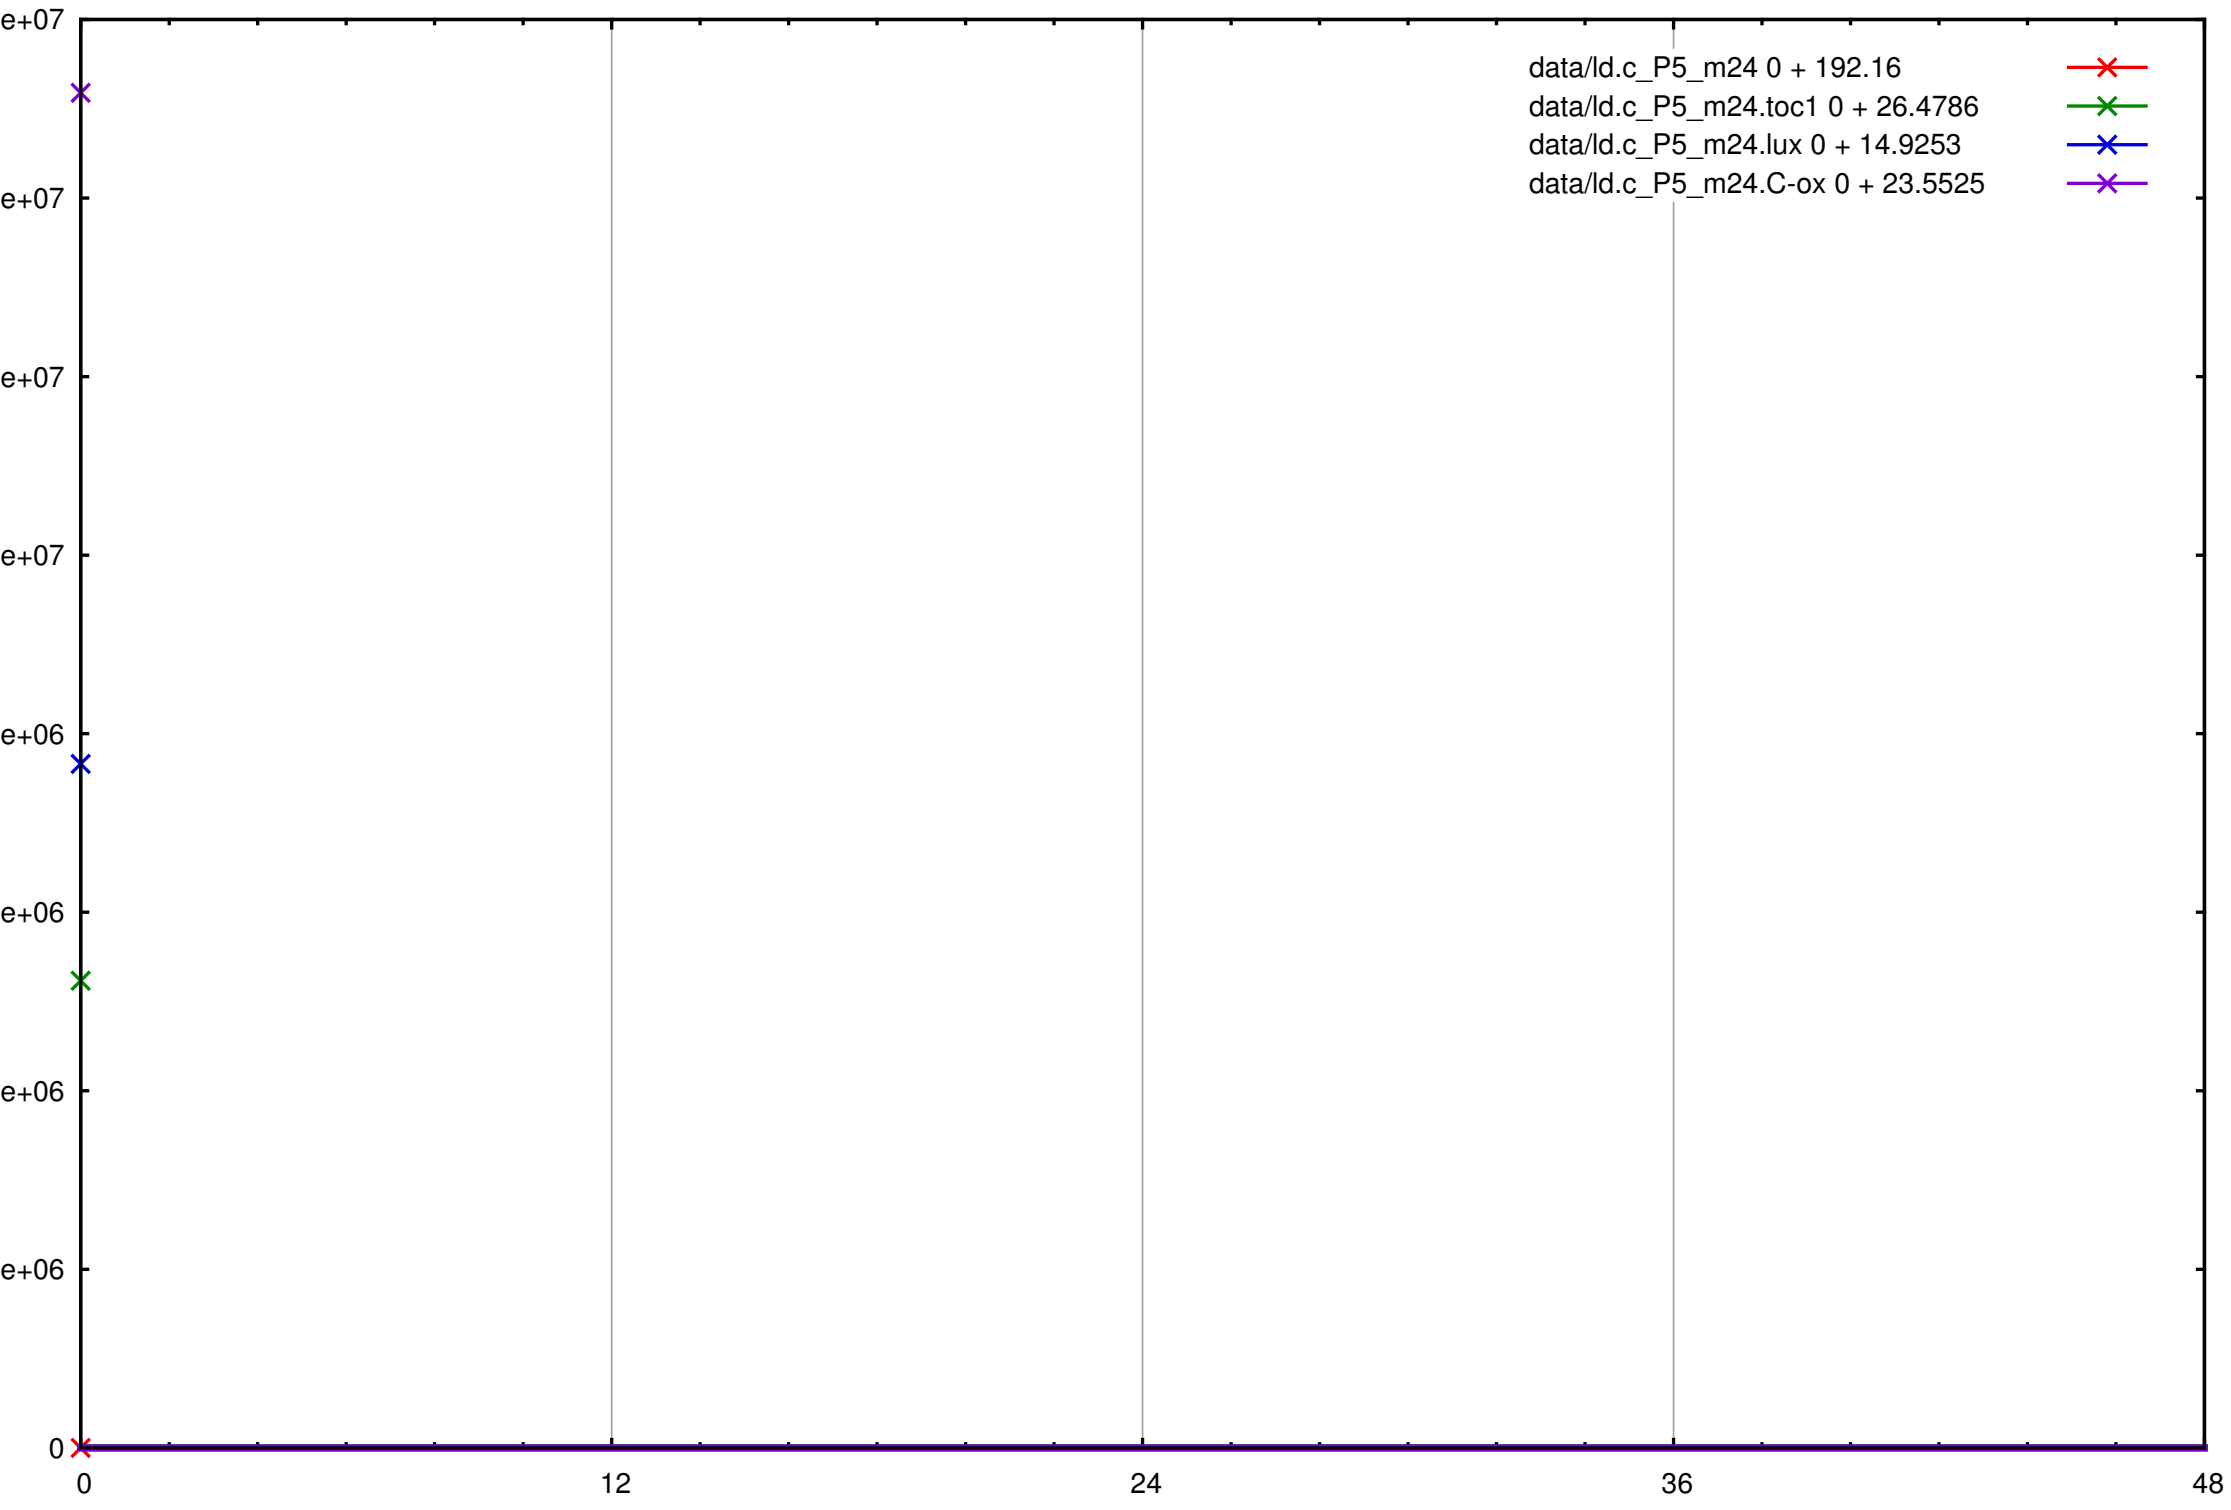

Scale group 231, scost 0.373366

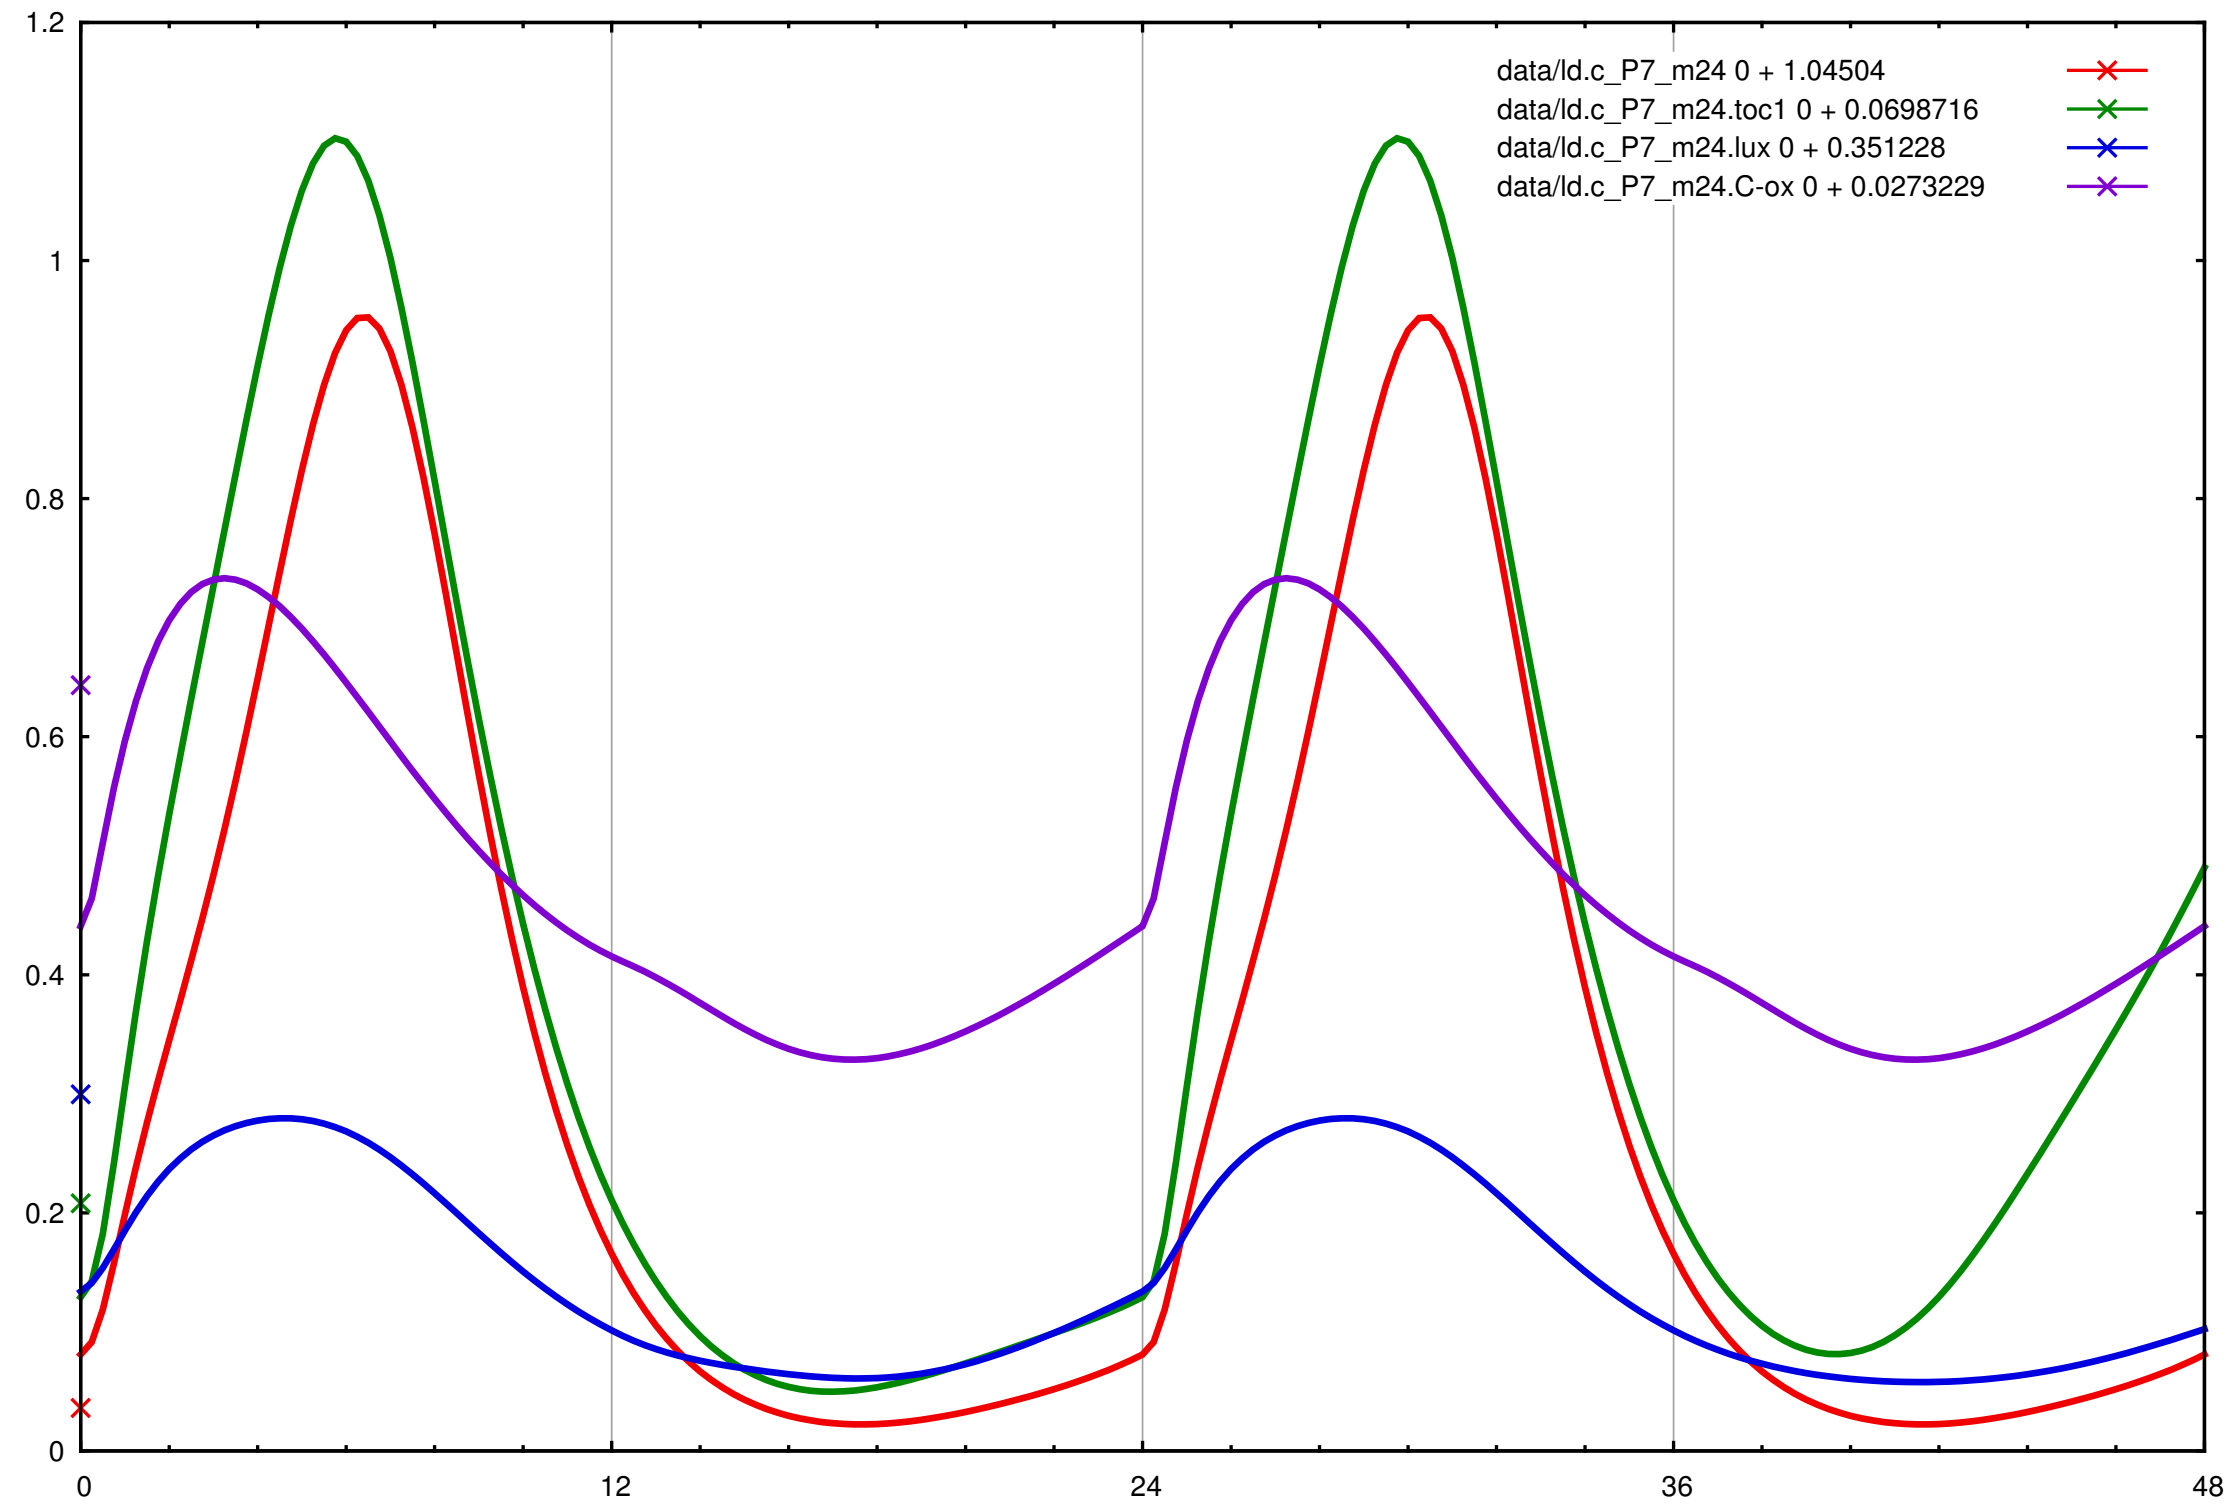

Scale group 232, scost 0.45543

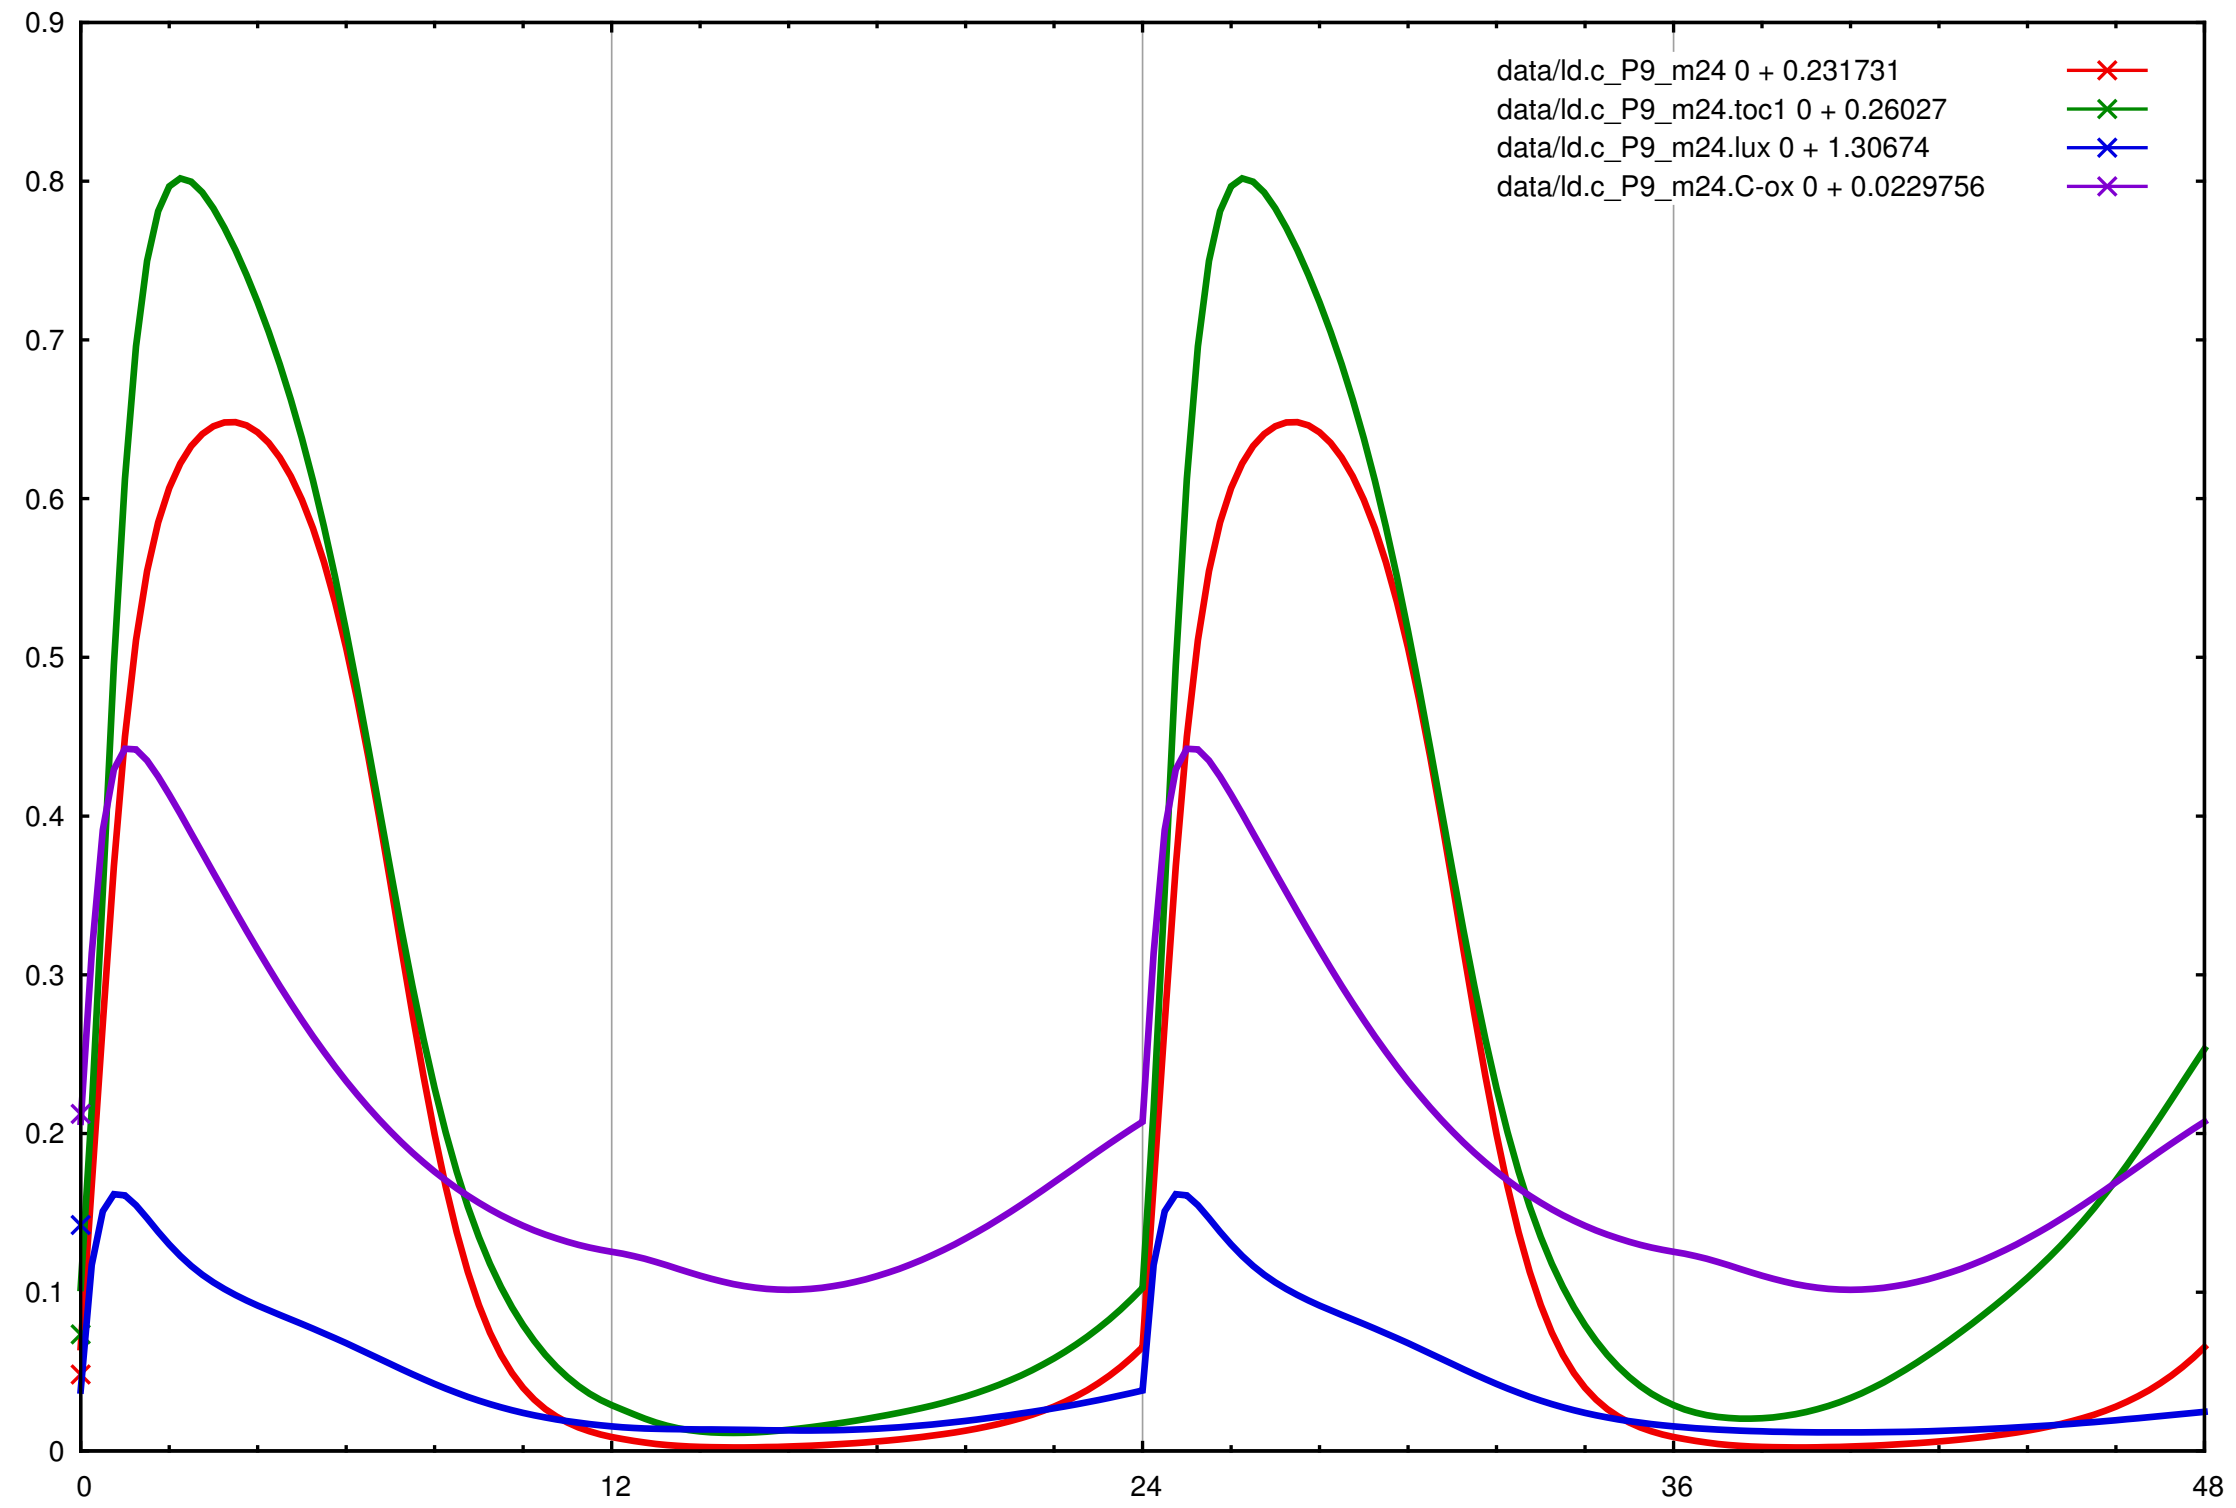



Scale group 233, scost 0

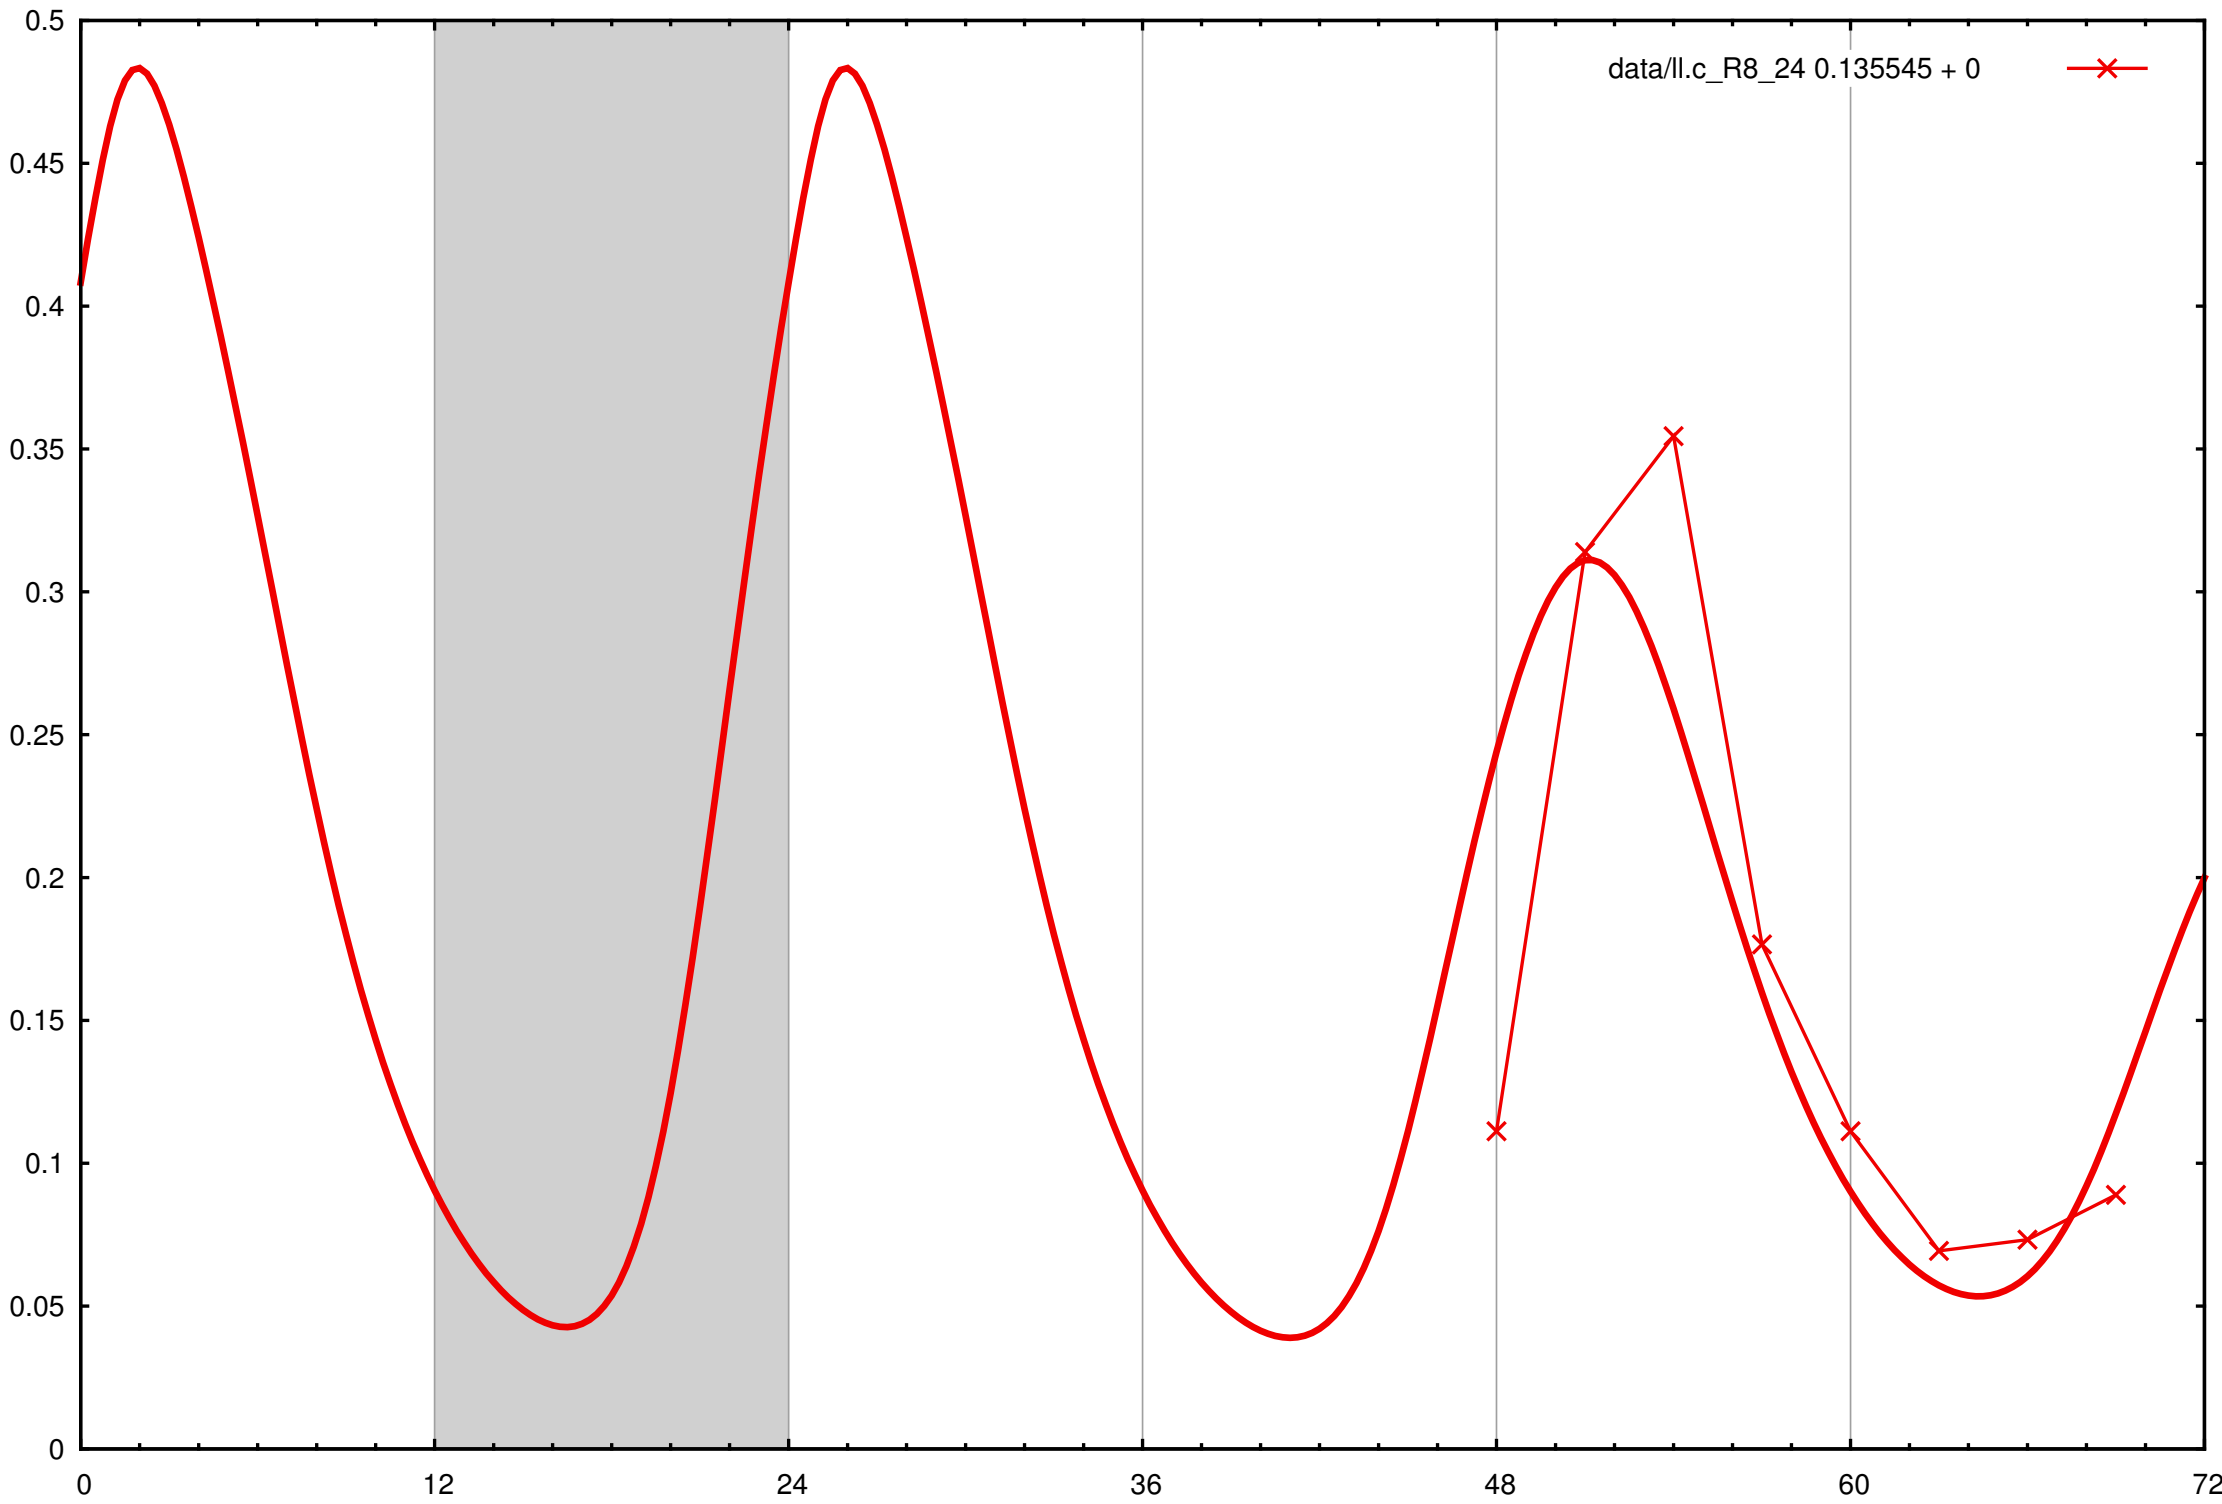

Scale group 234, scost 0.000616135

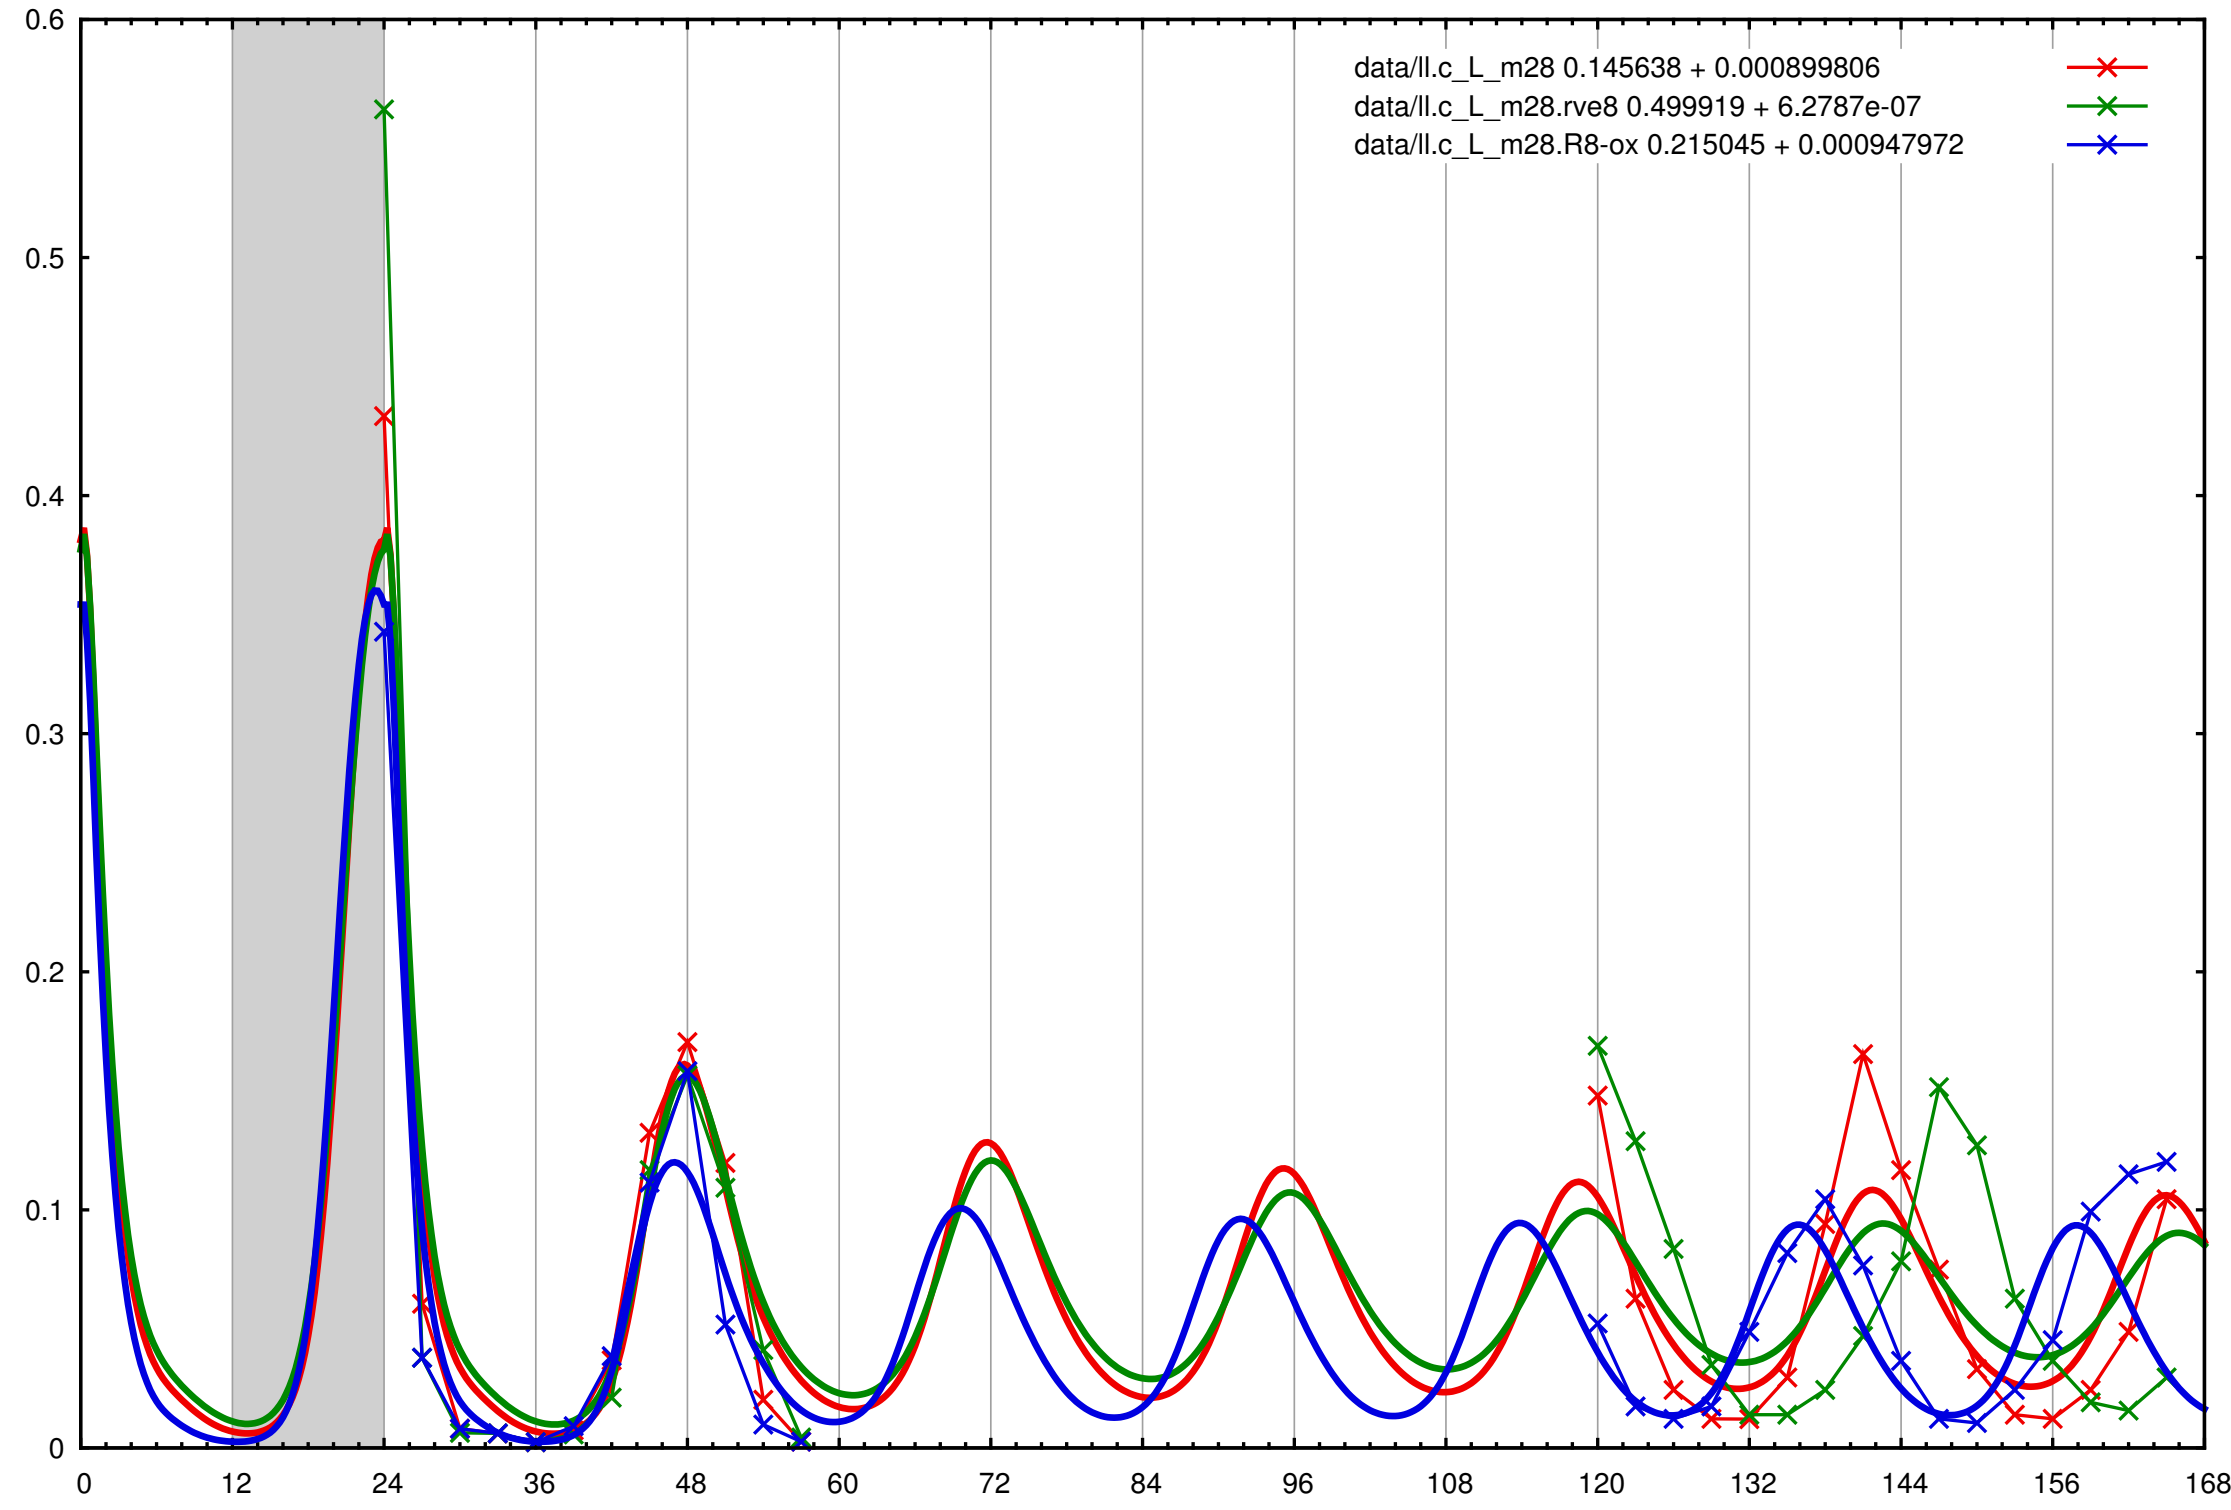

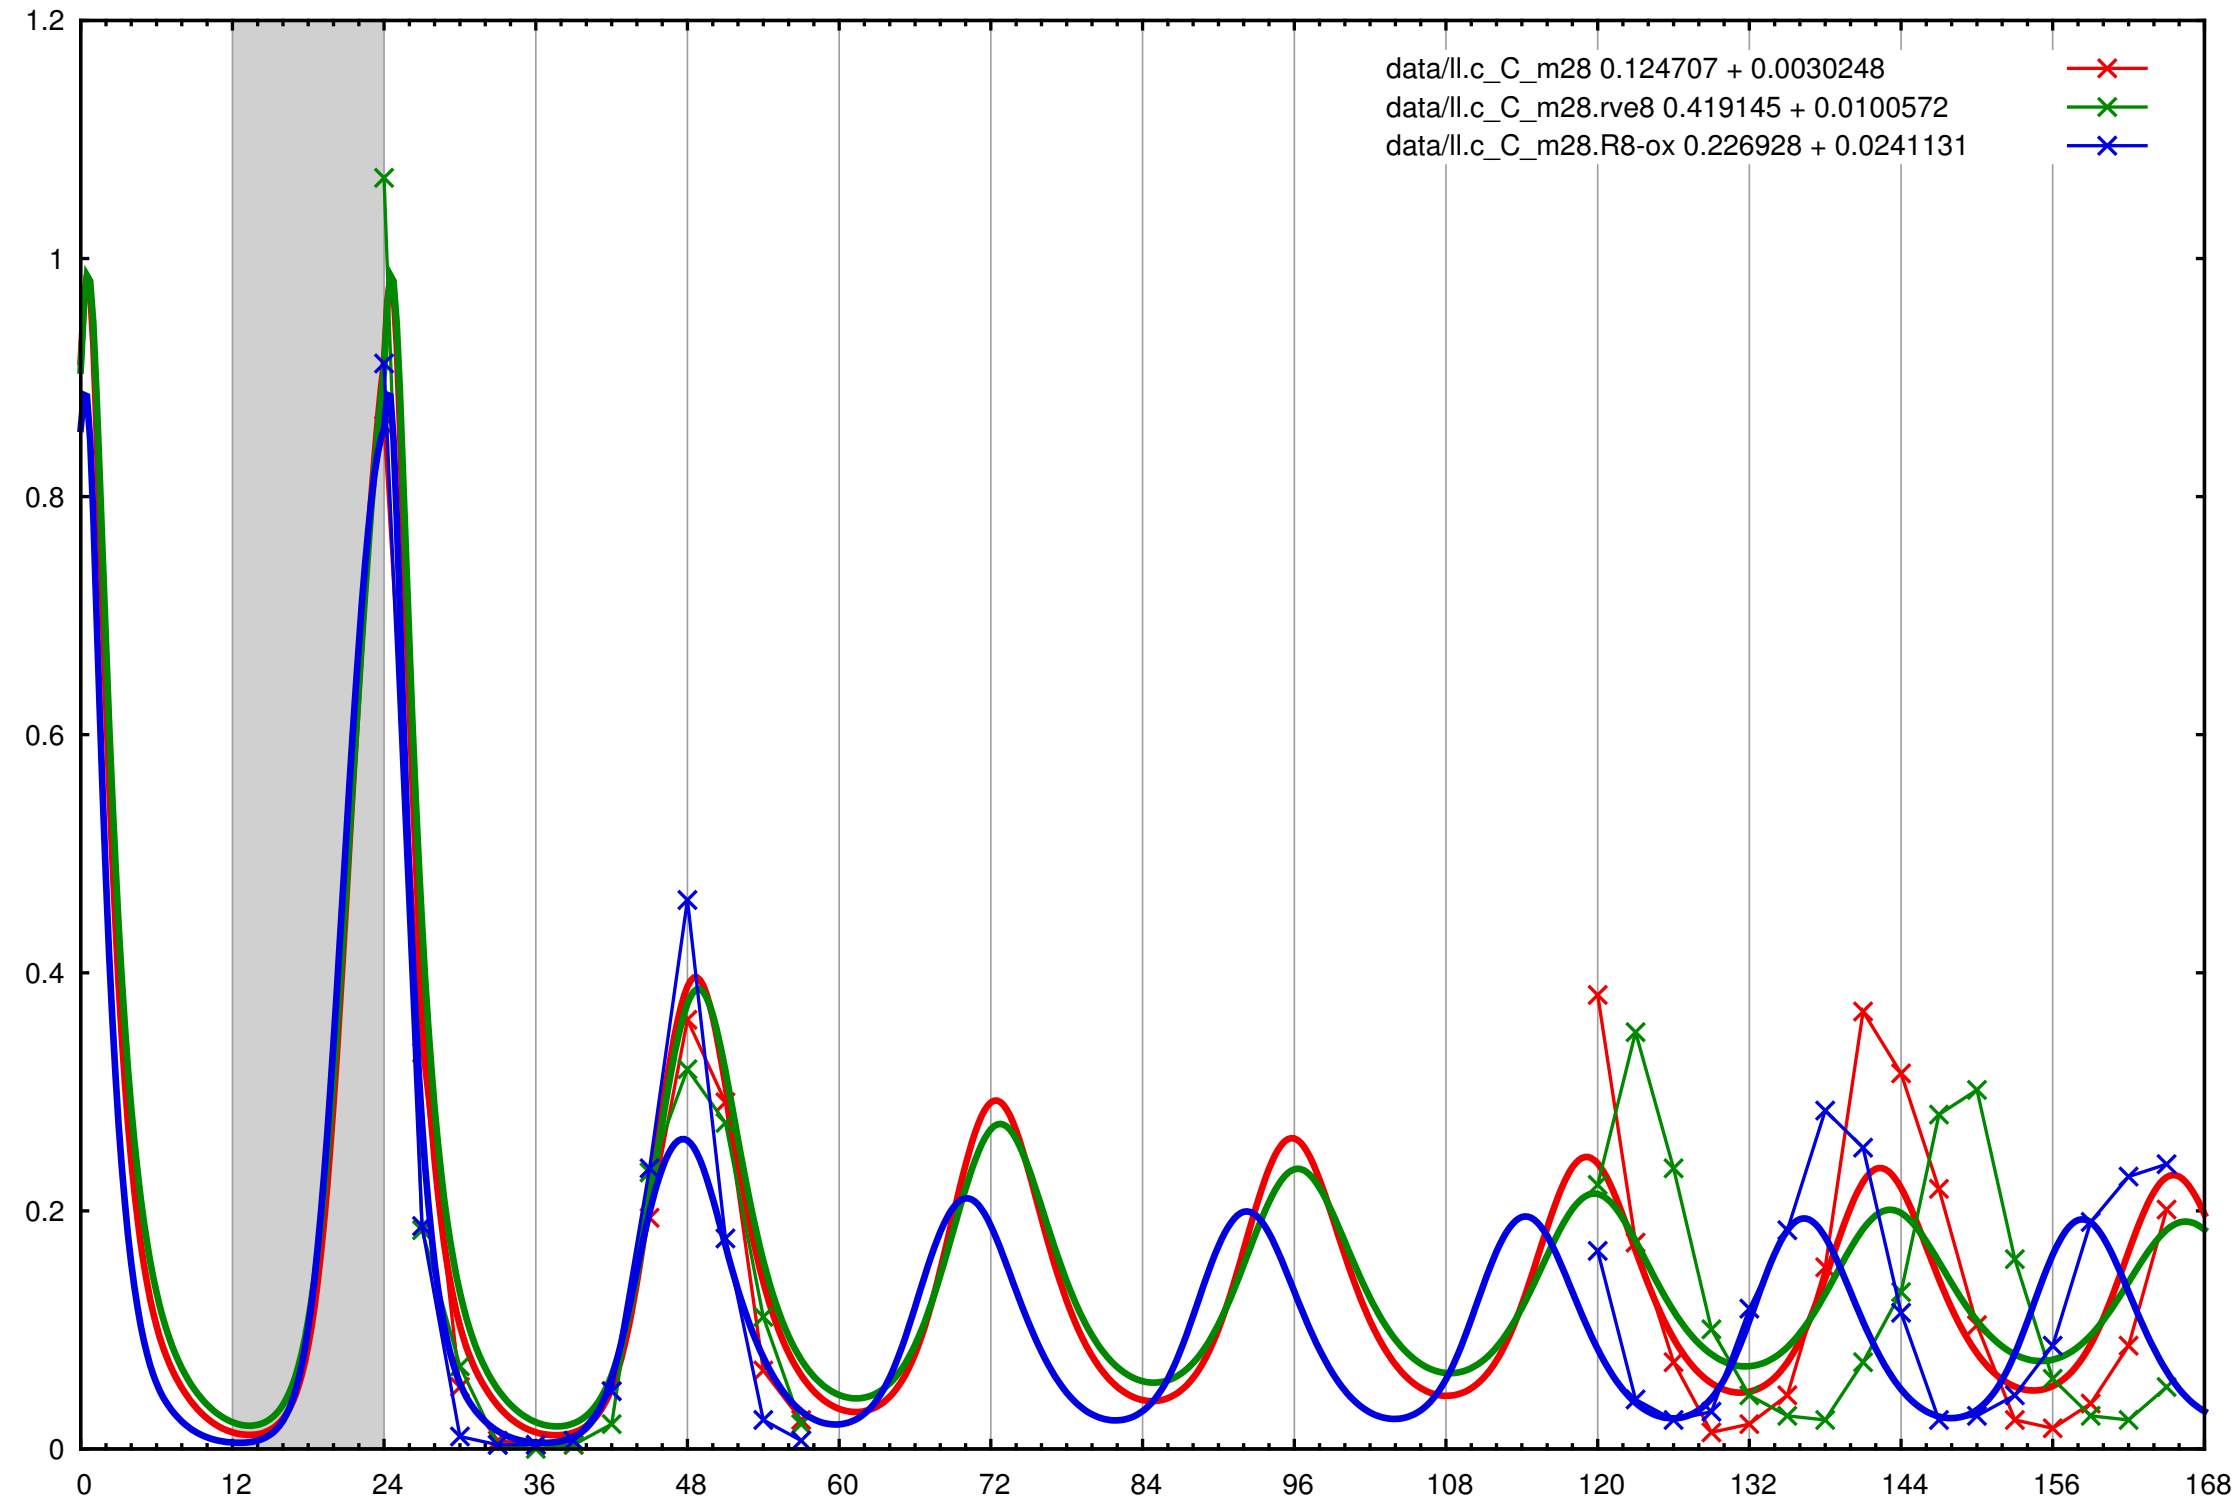

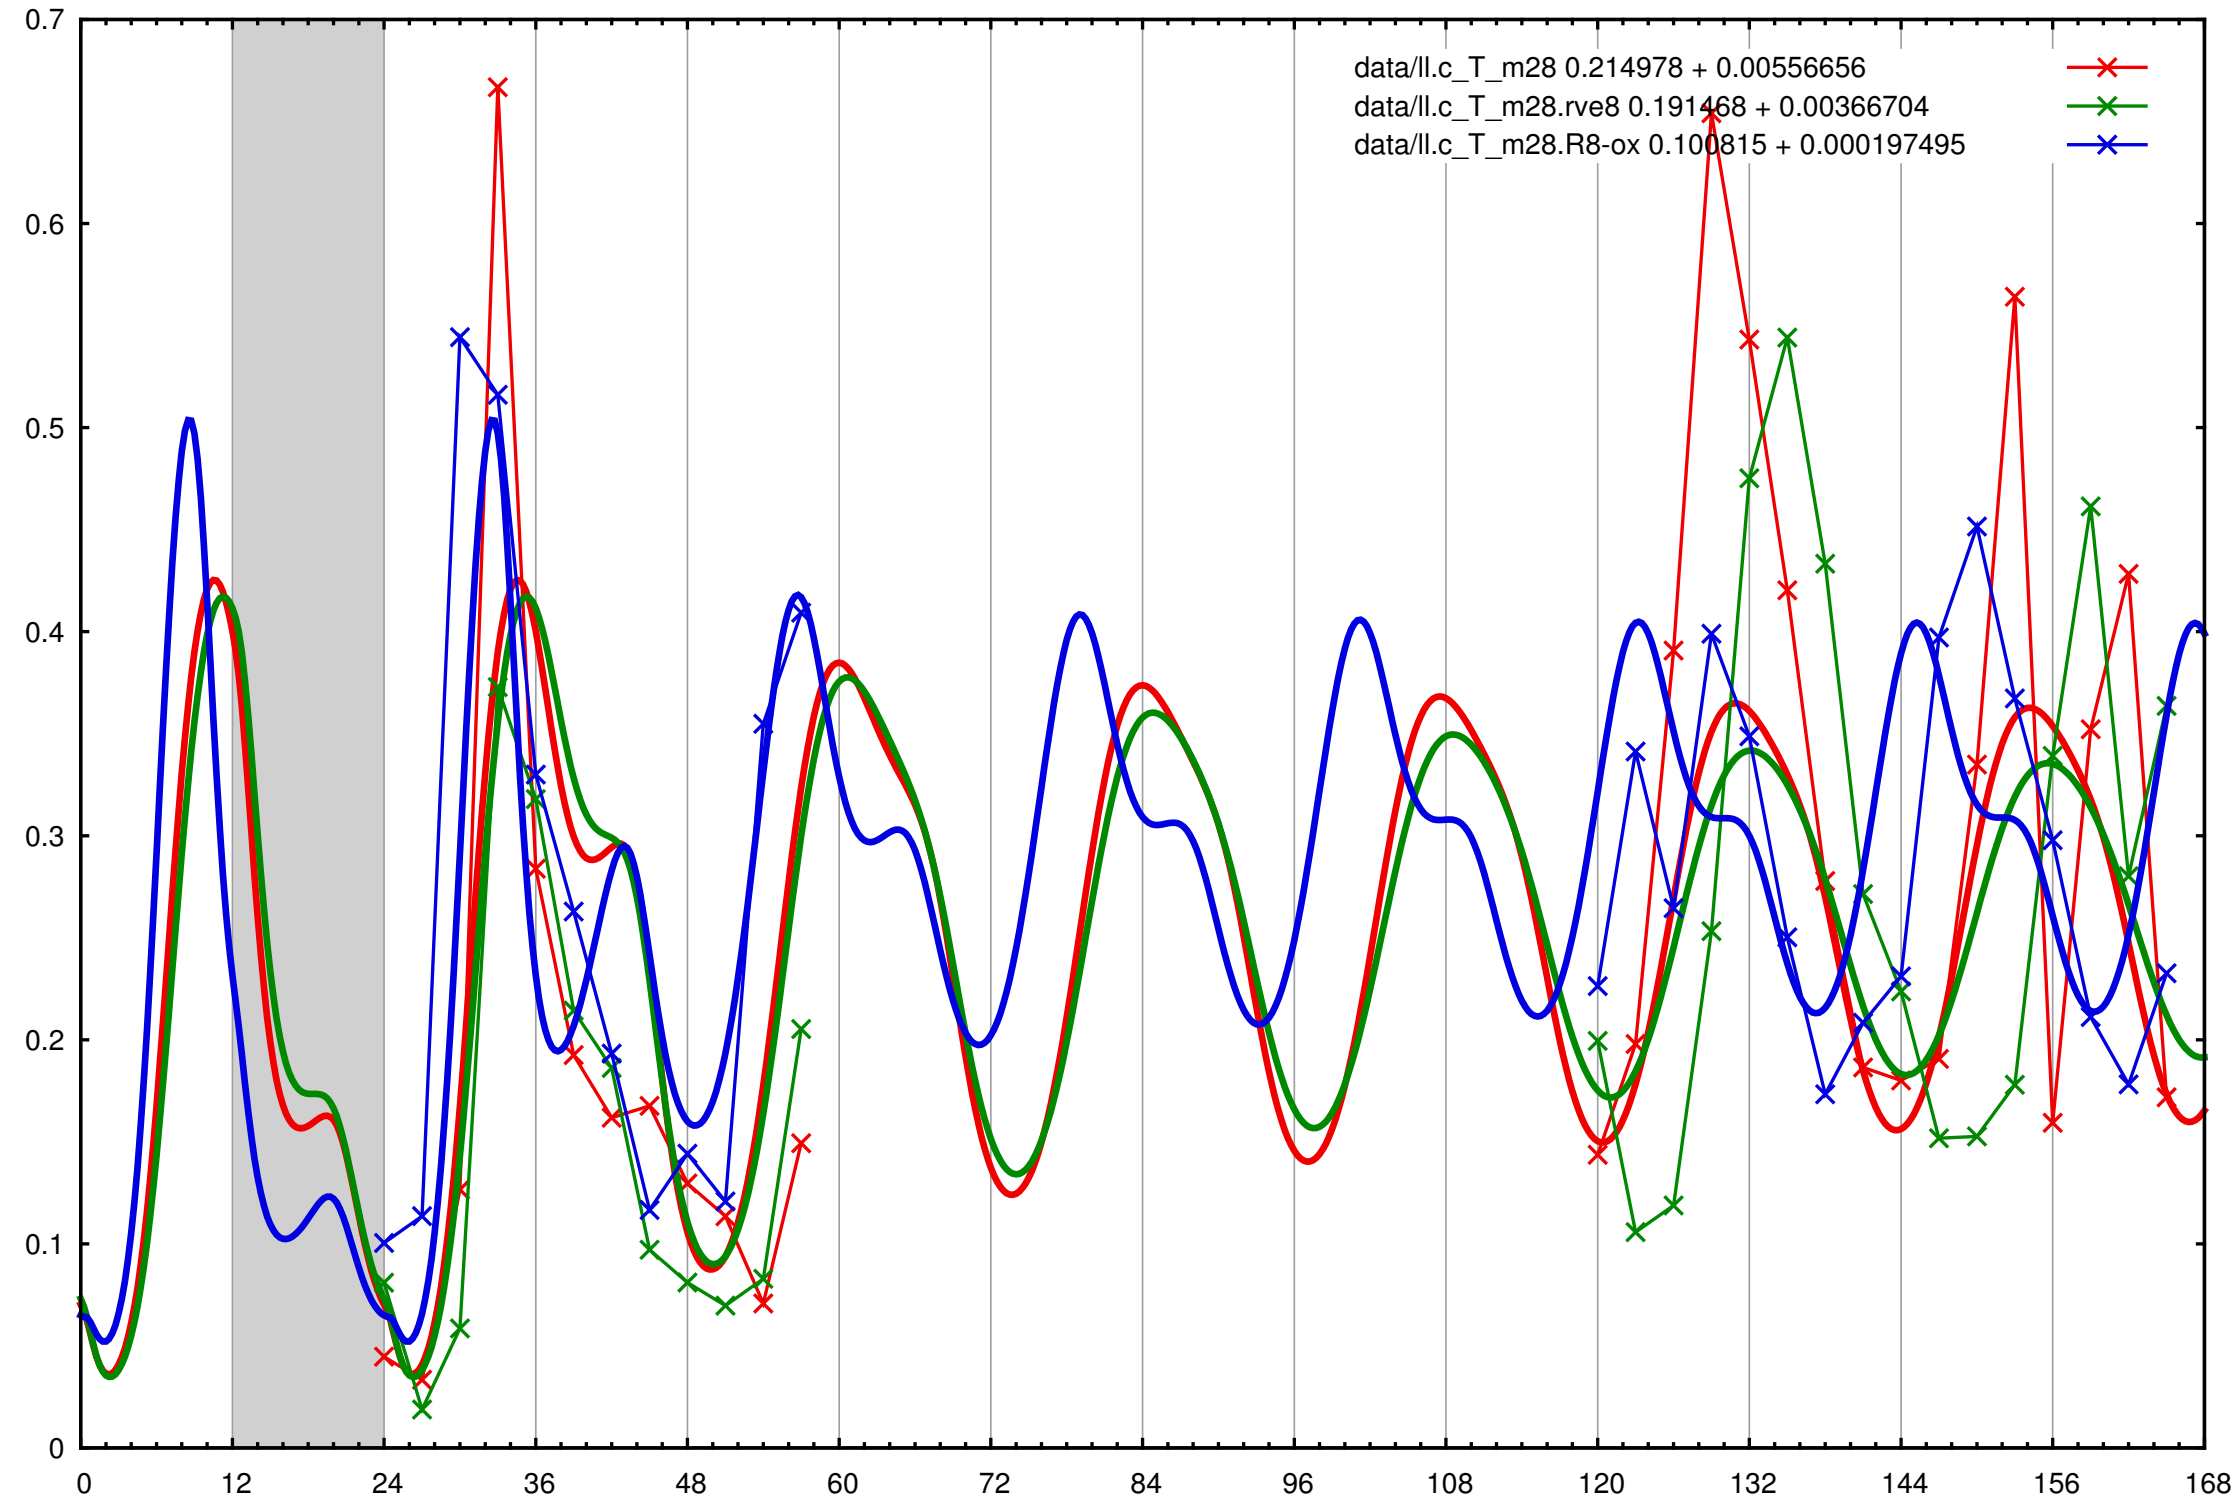

Scale group 237, scost 0.0016033

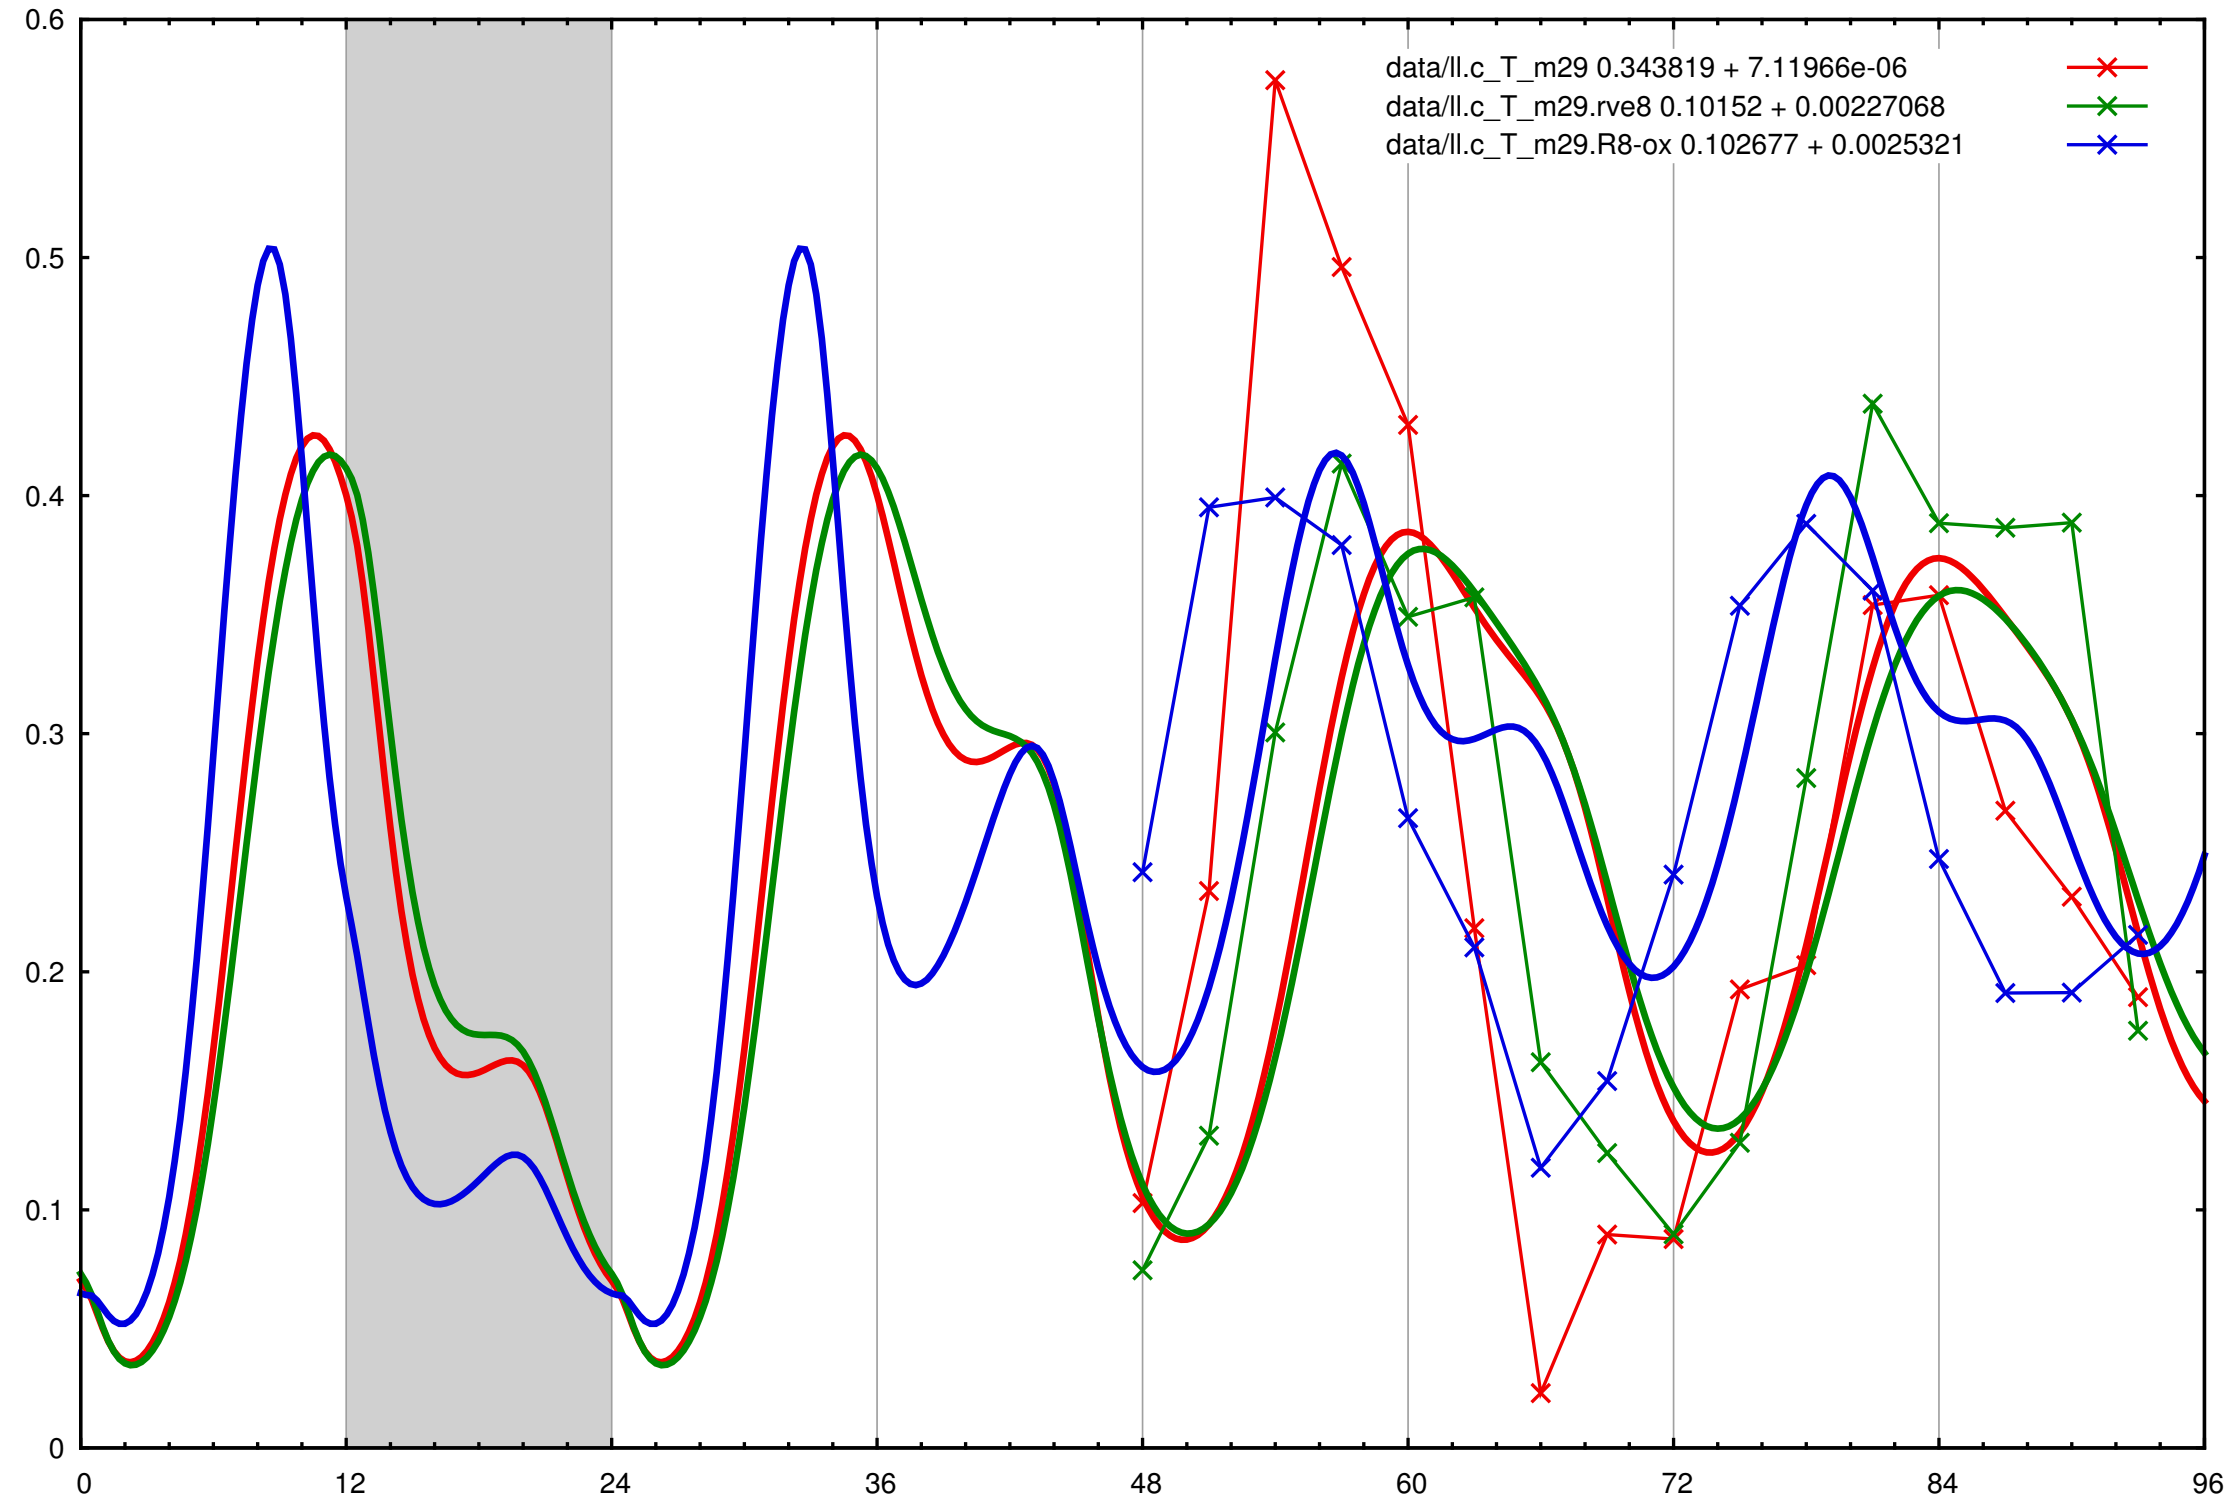

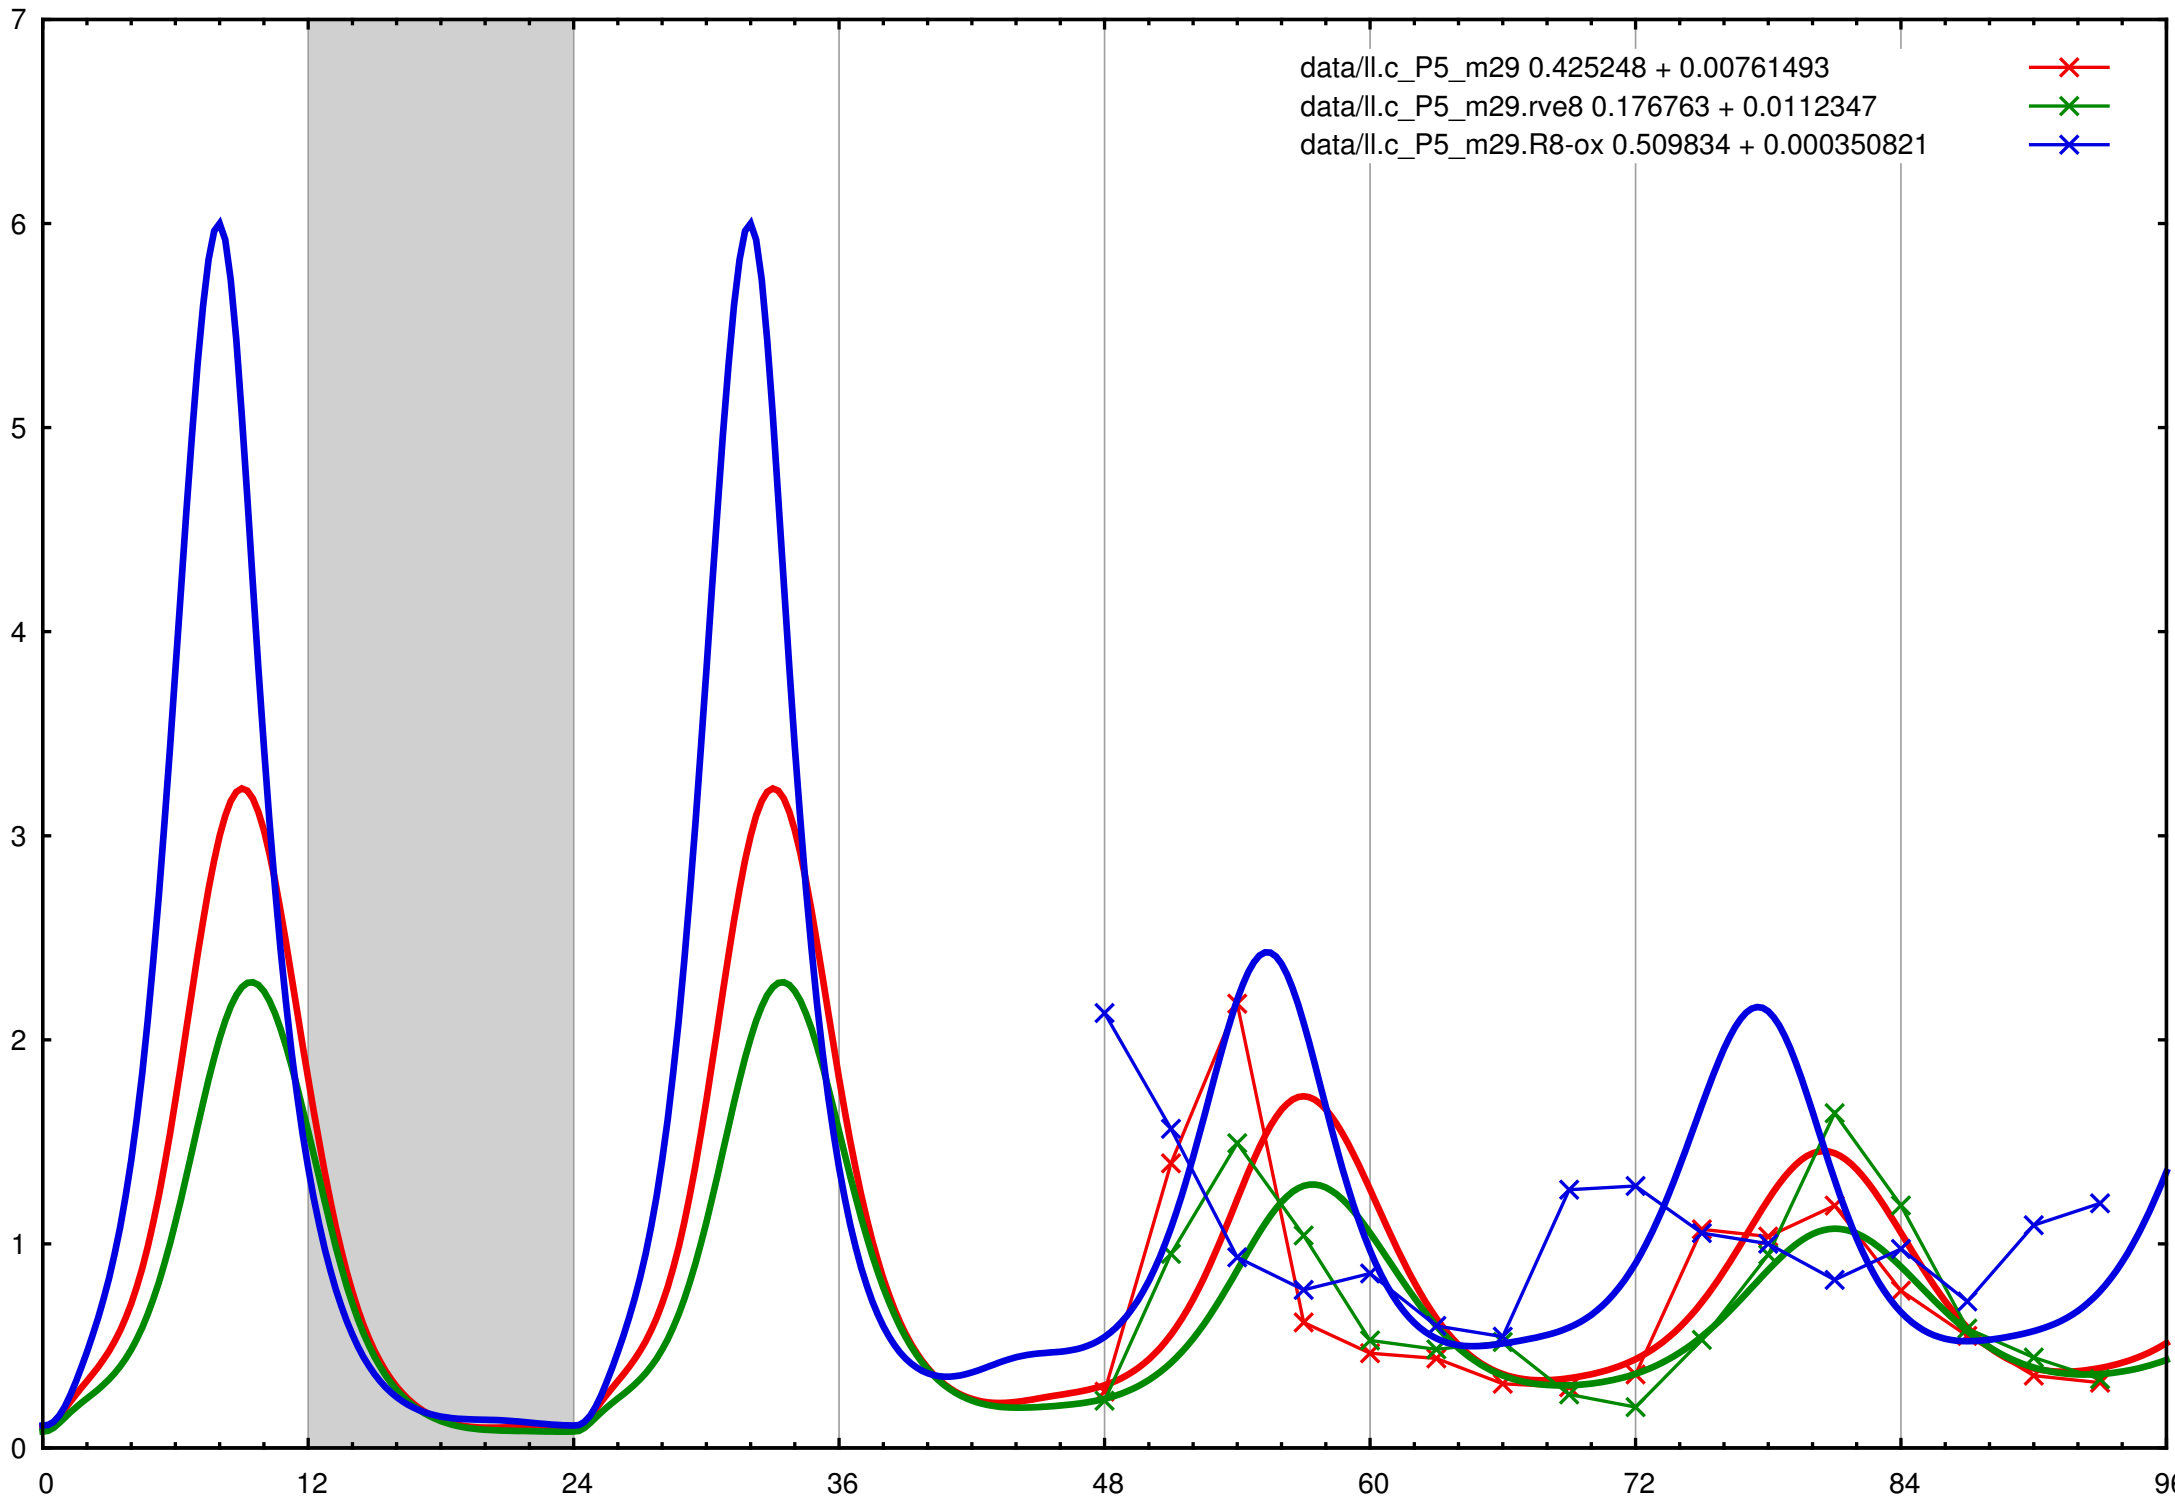

Scale group 239, scost 0.295406

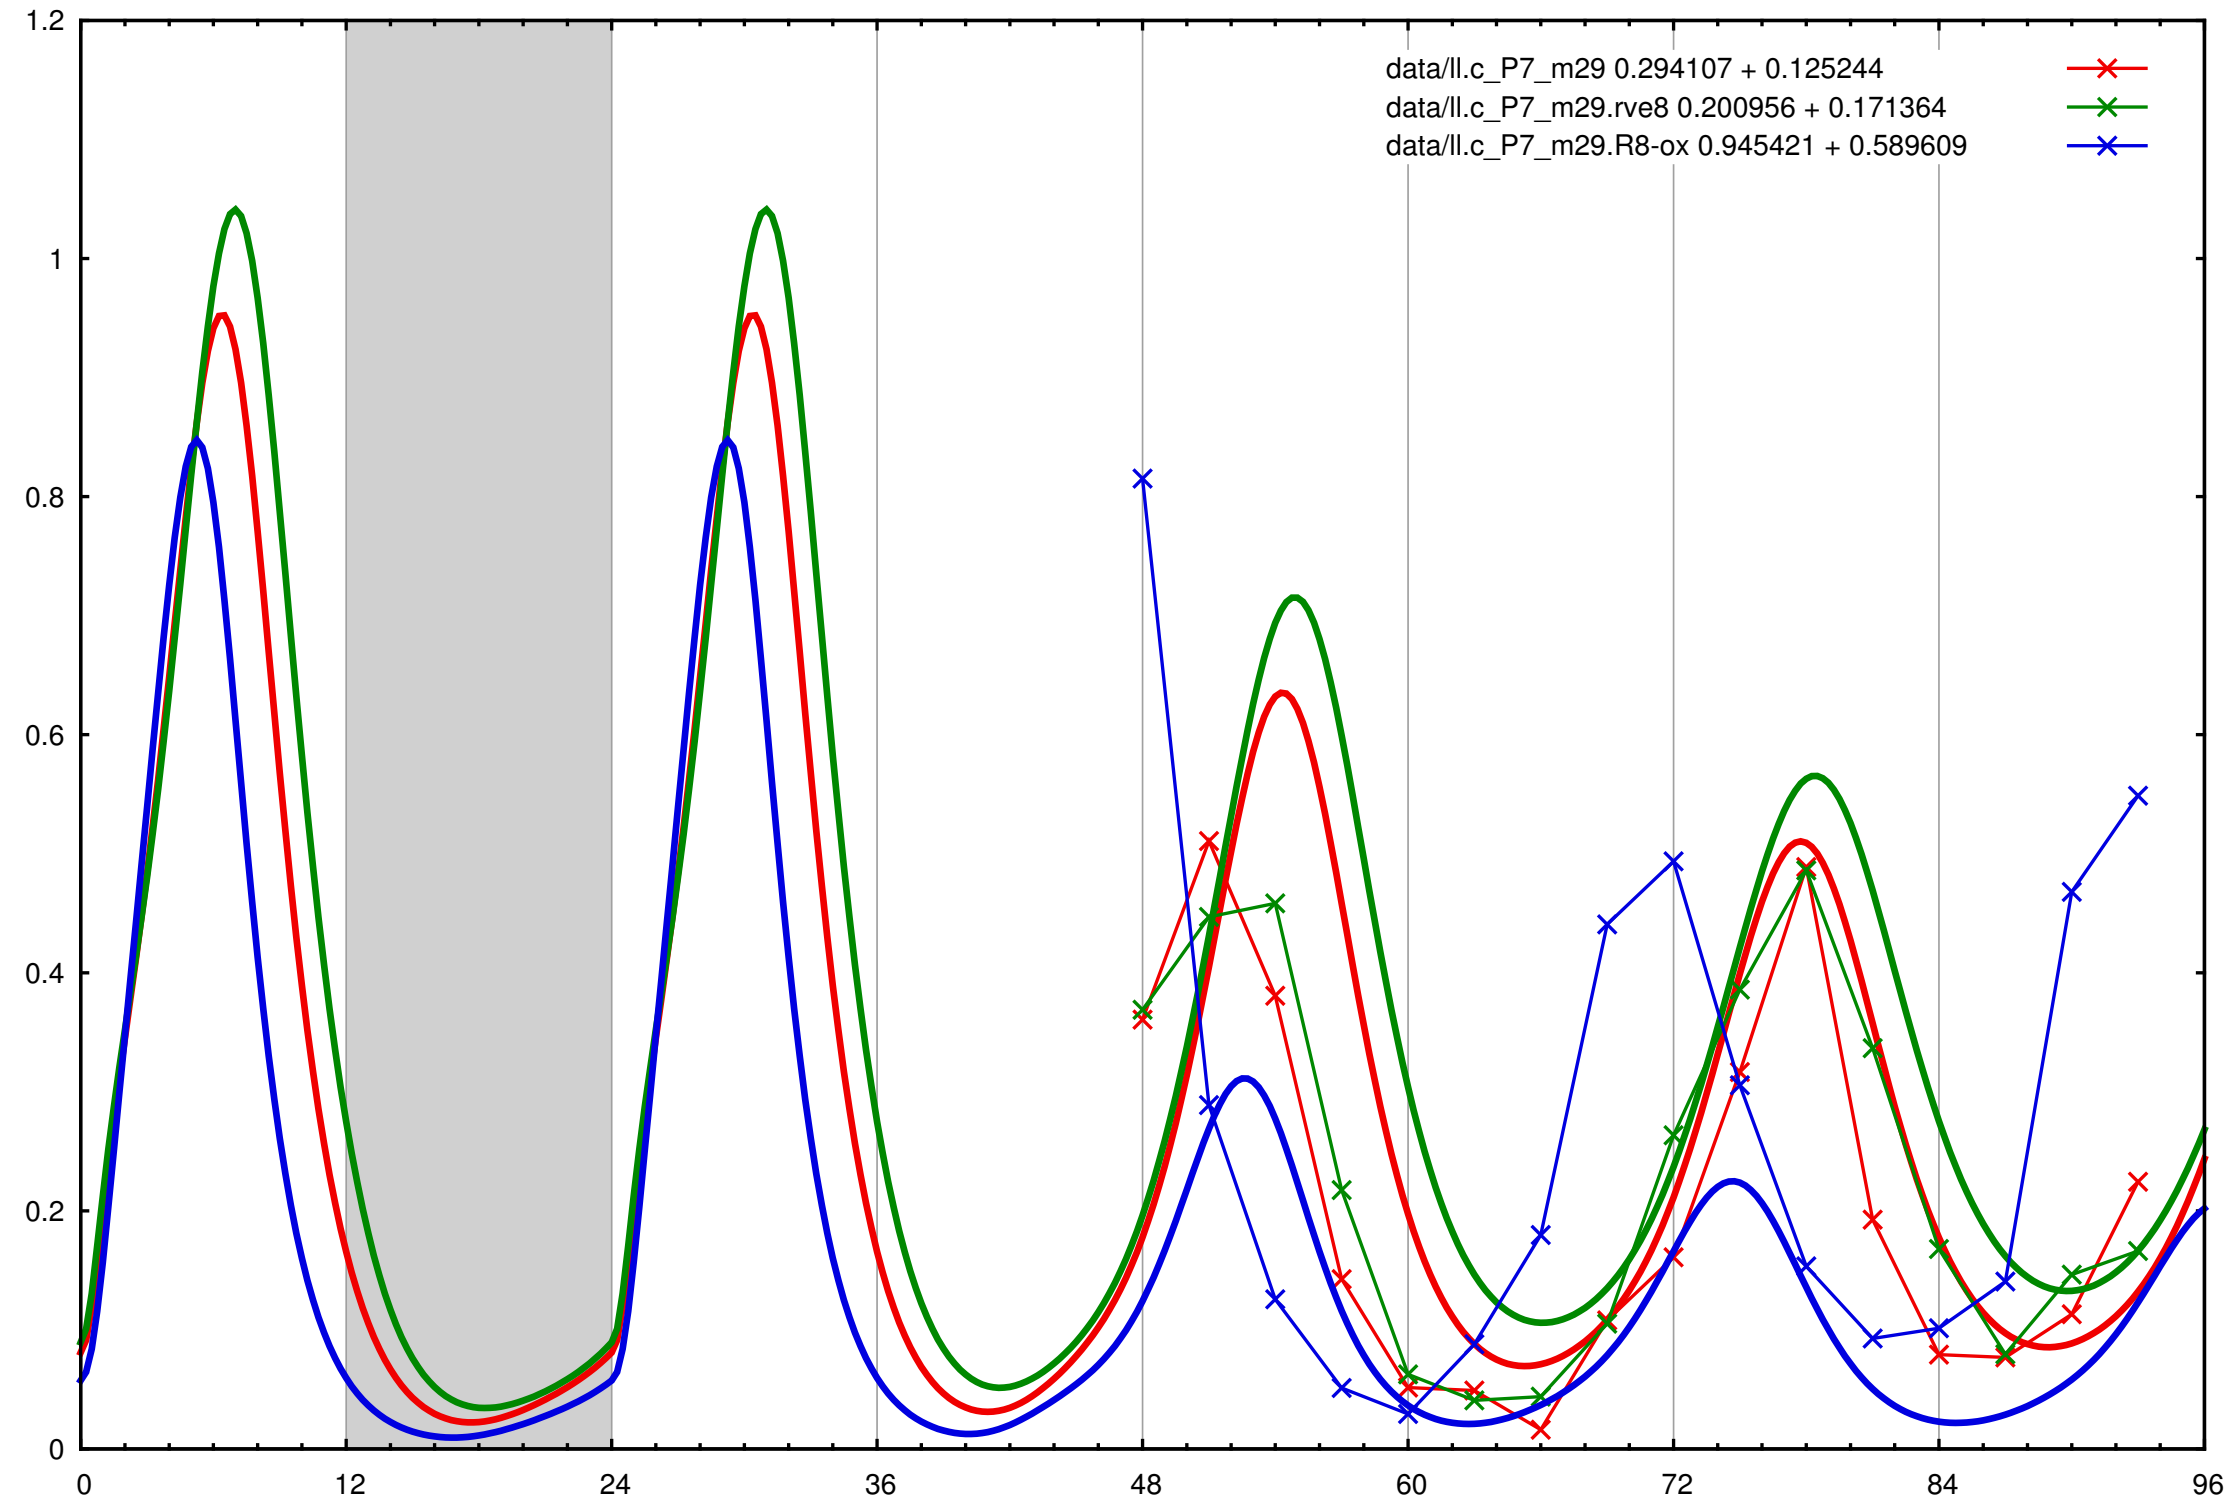

Scale group 240, scost 0.0197086

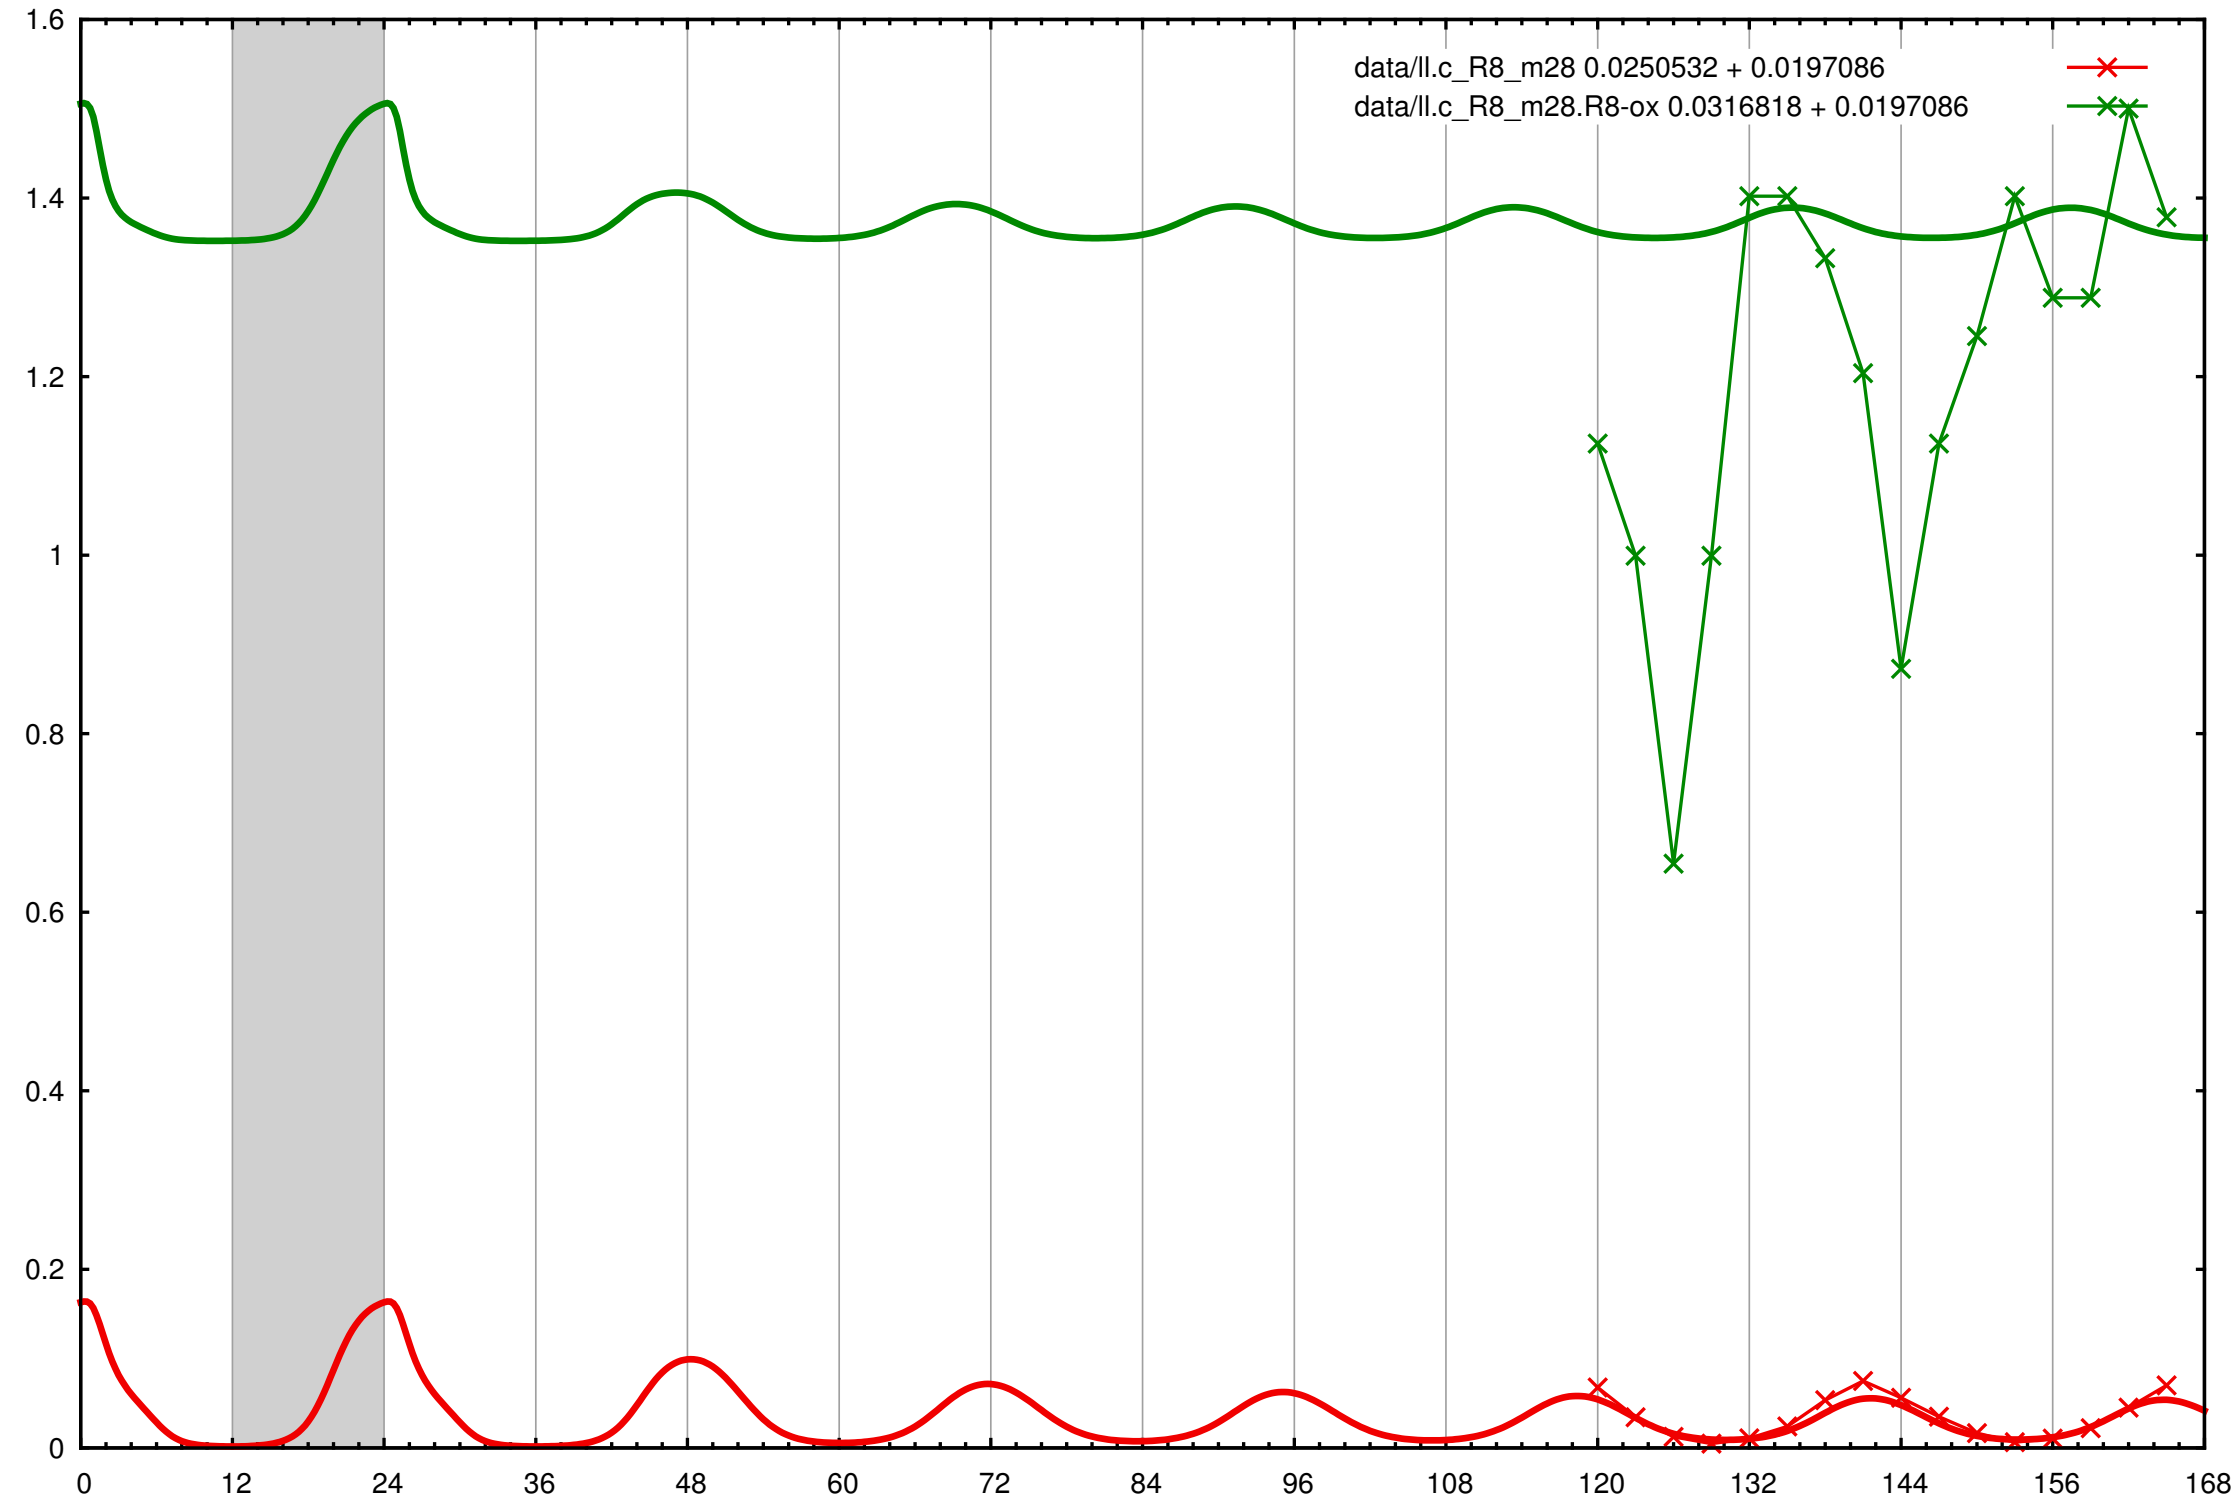



Scale group 241, scost 0.110907

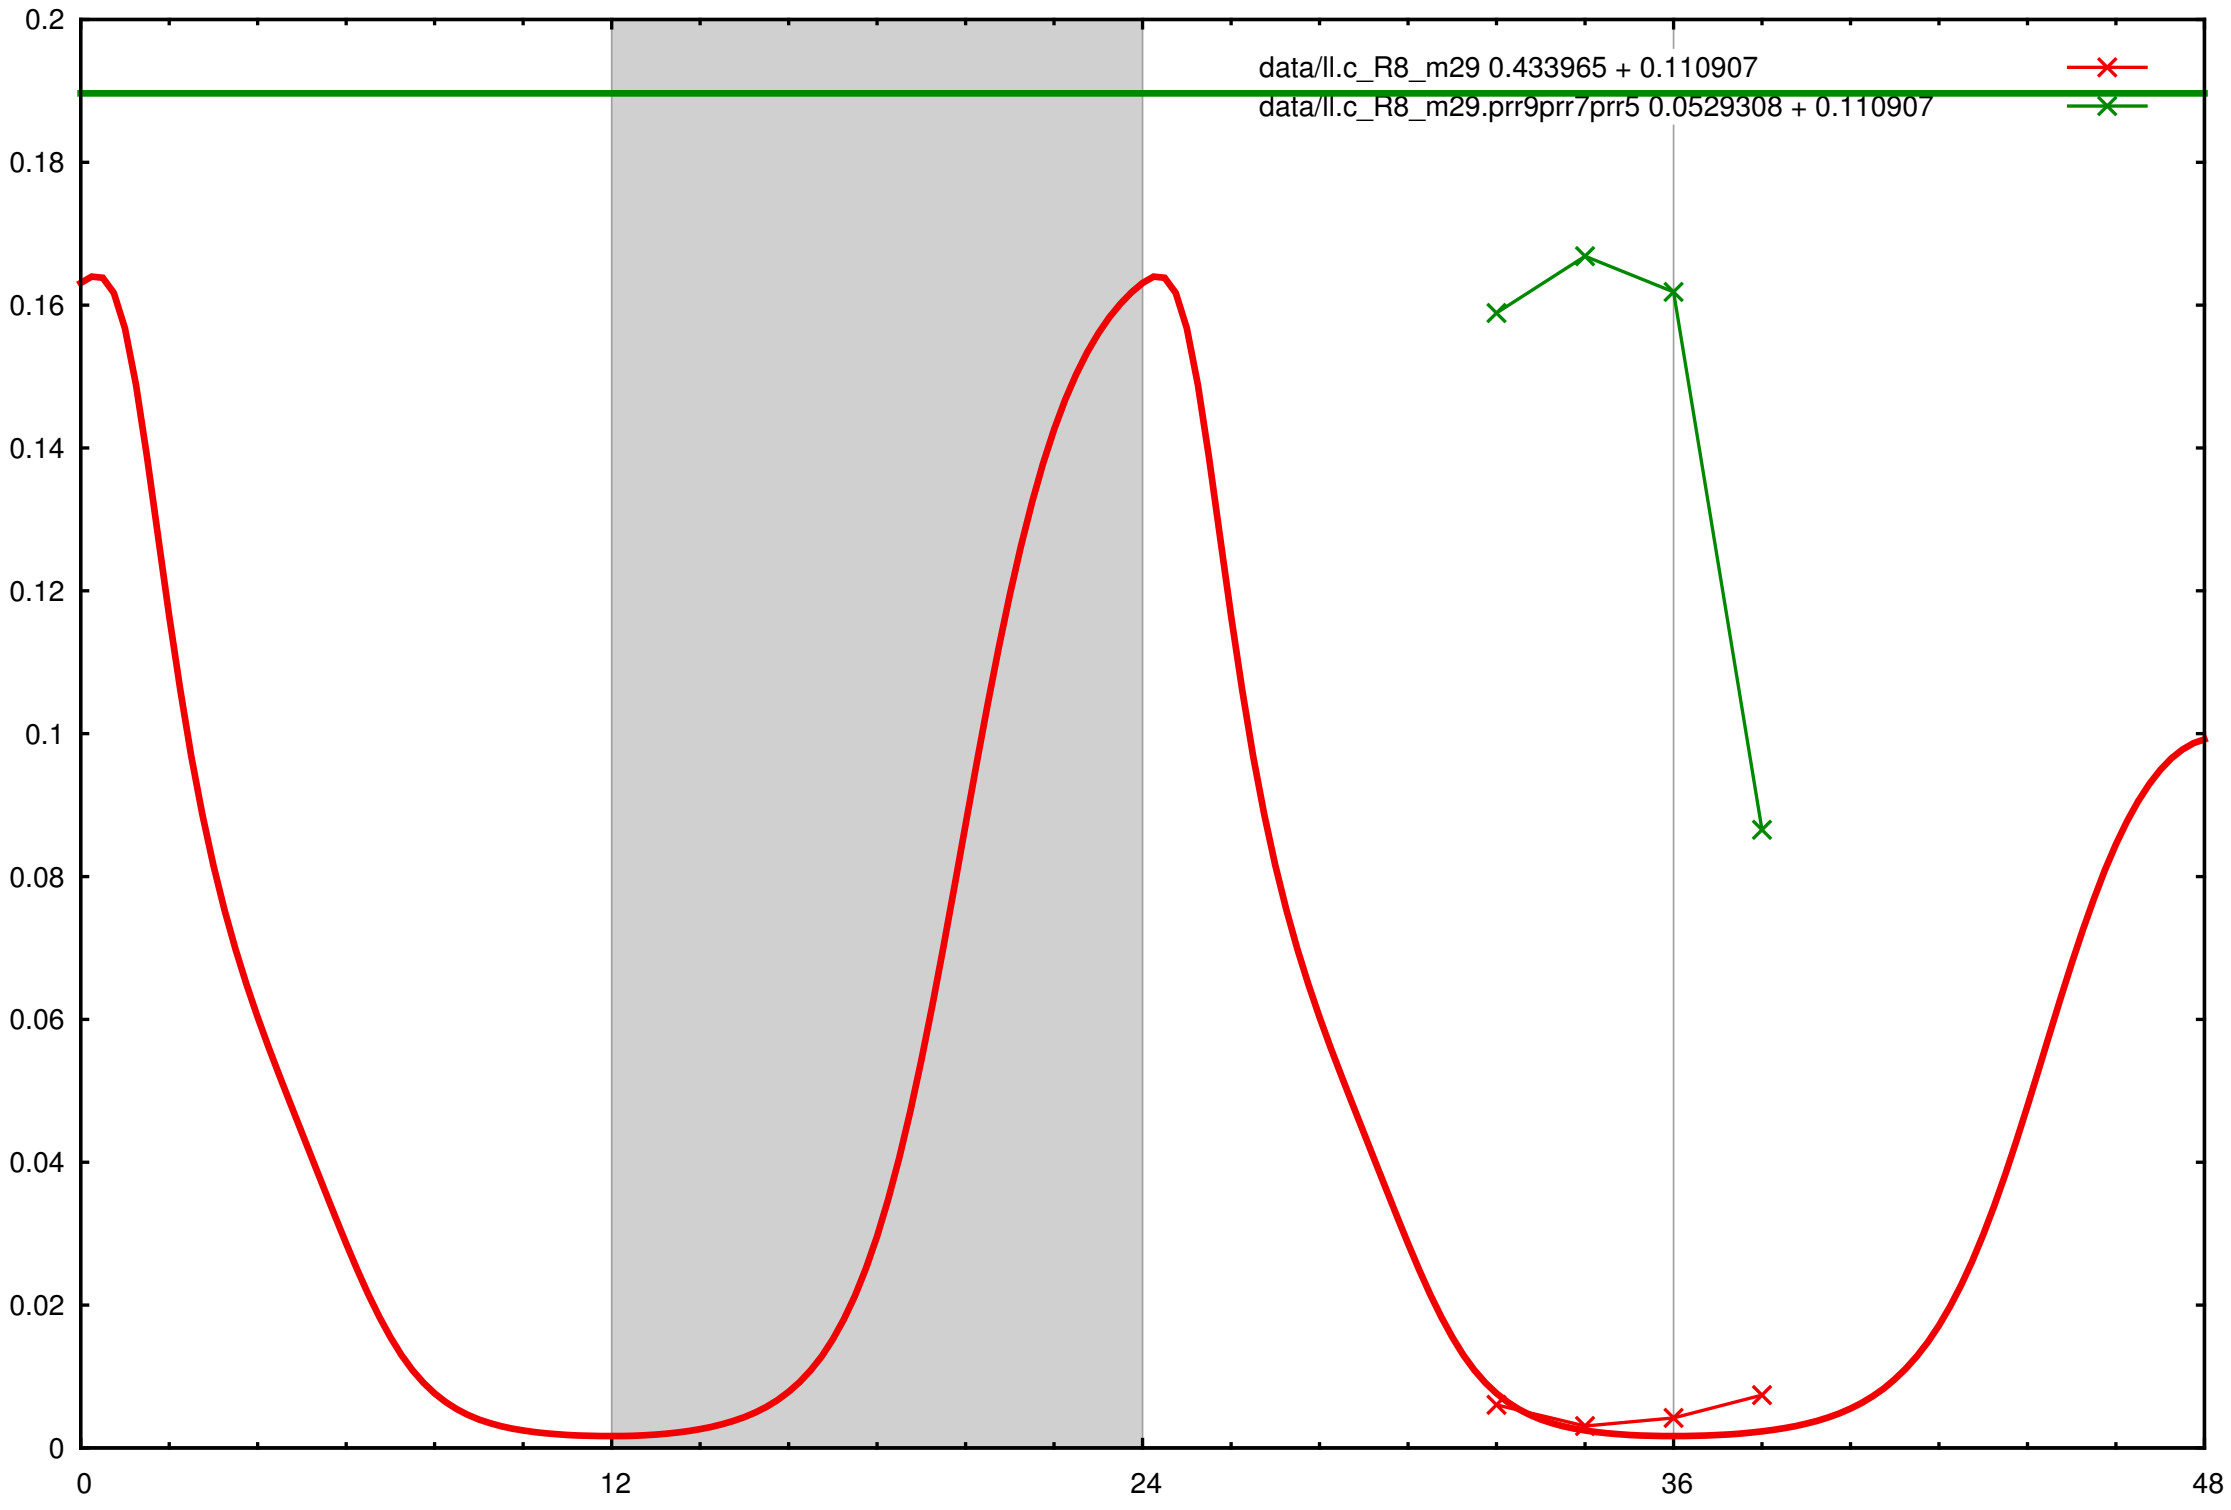

Scale group 242, scost 0

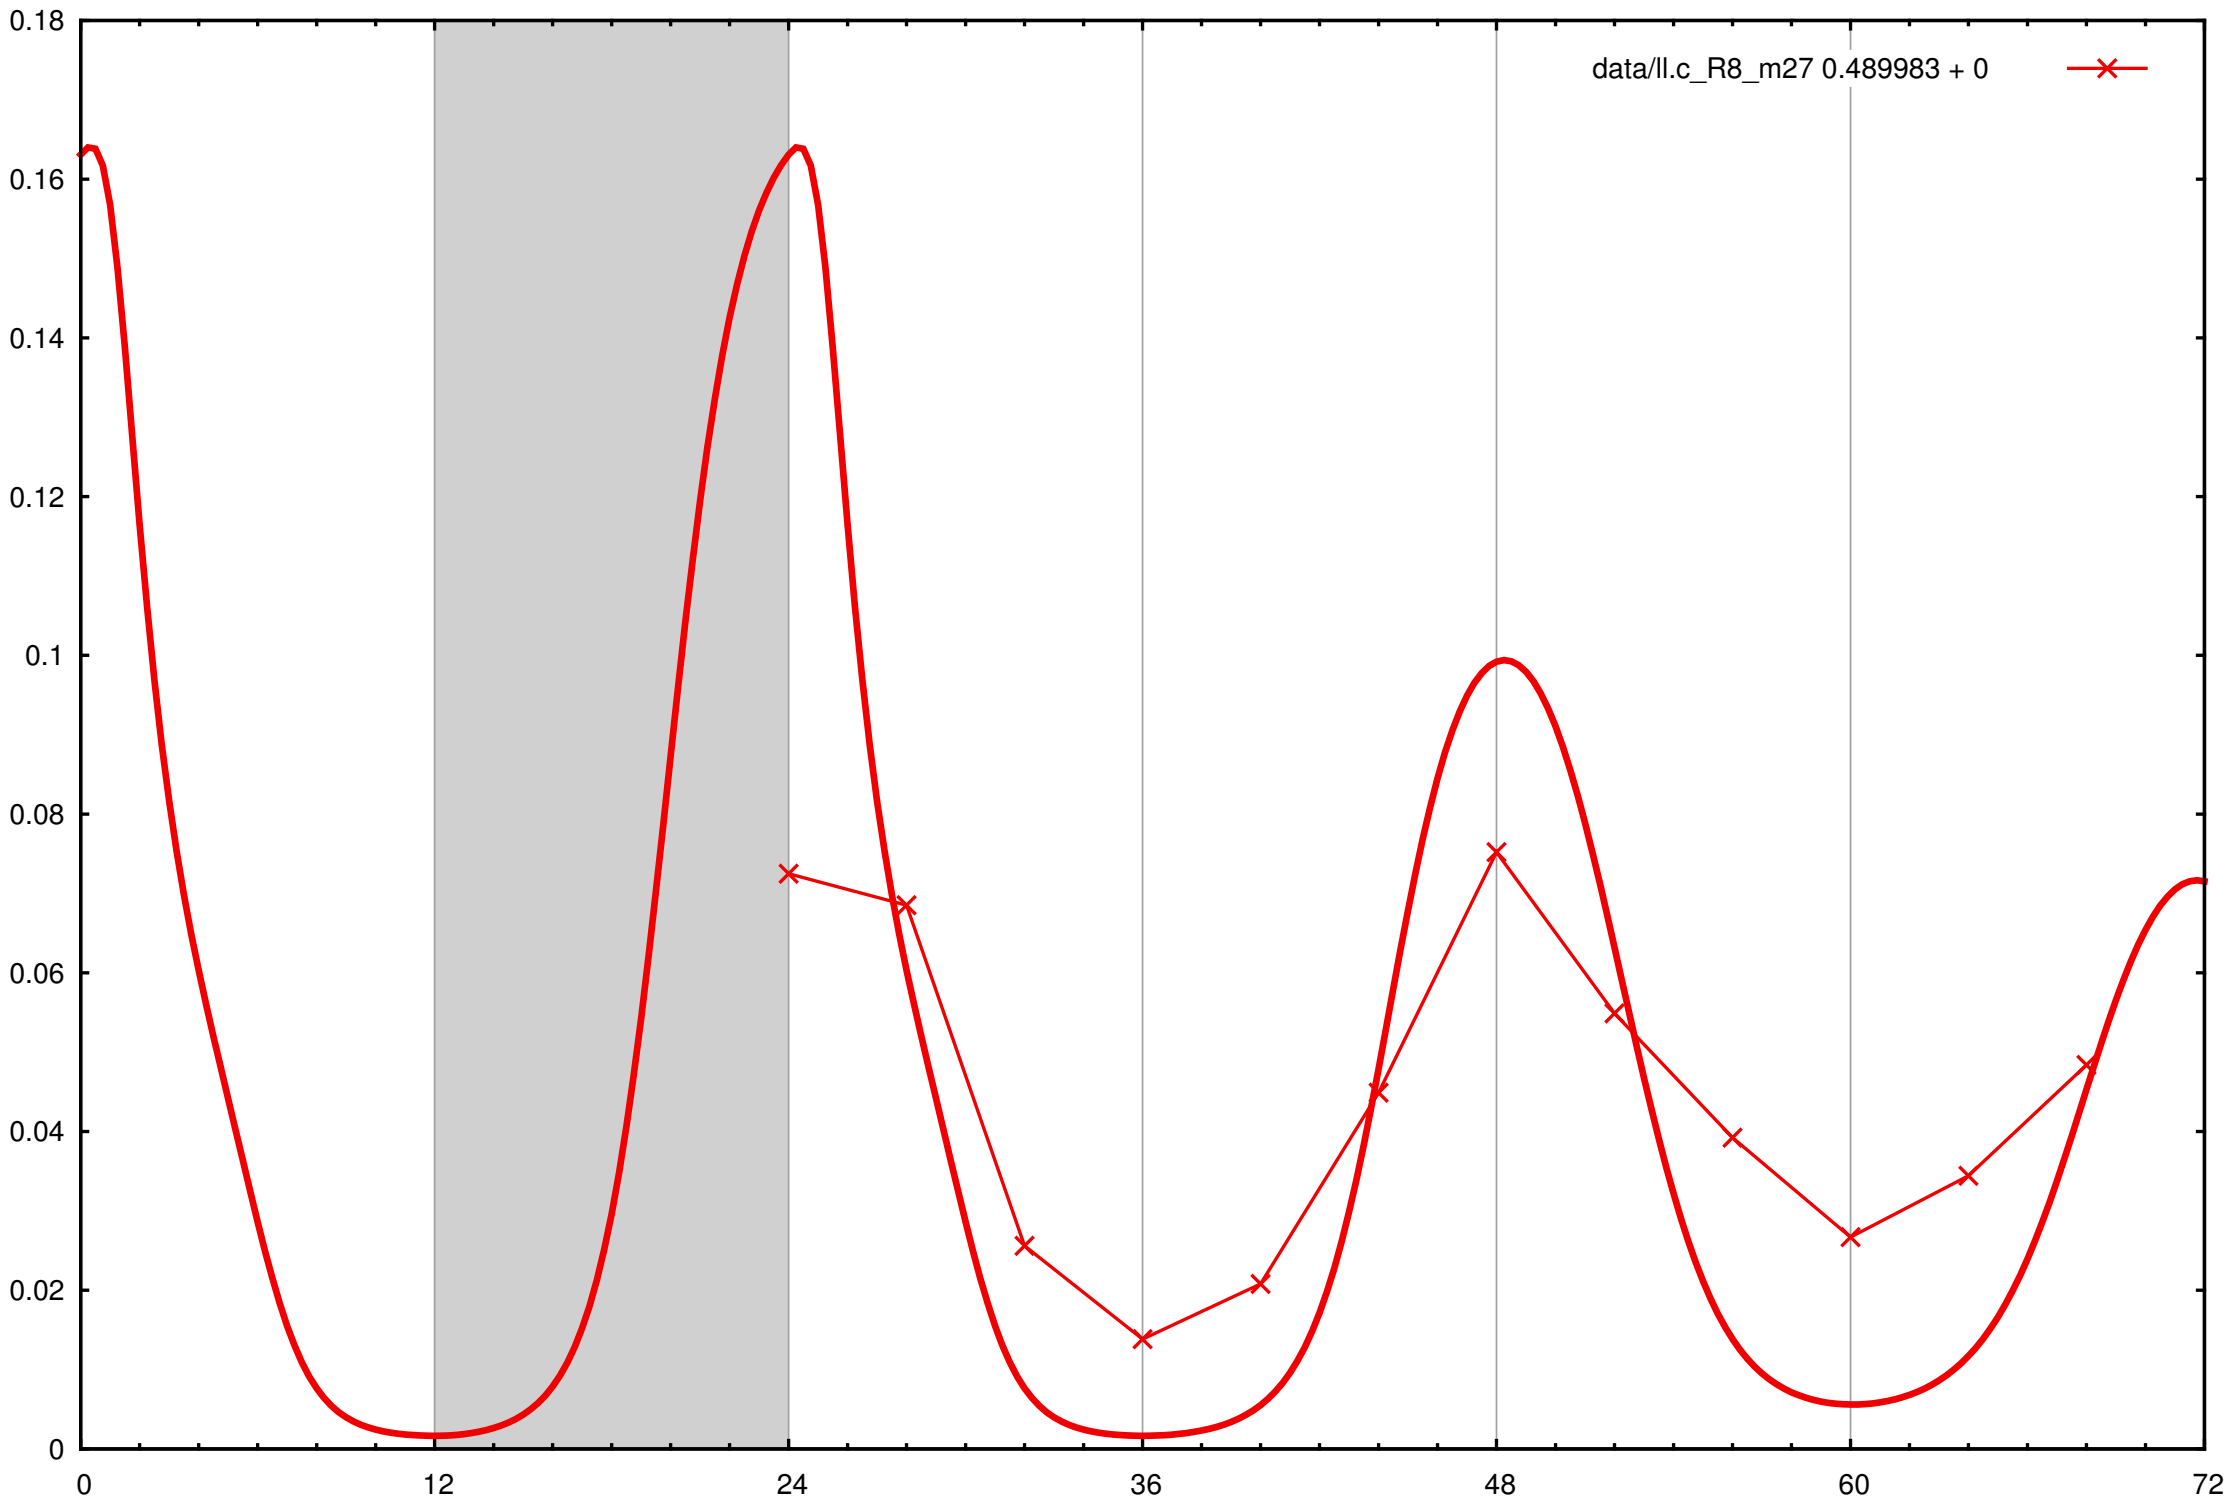

Scale group 243, scost 0

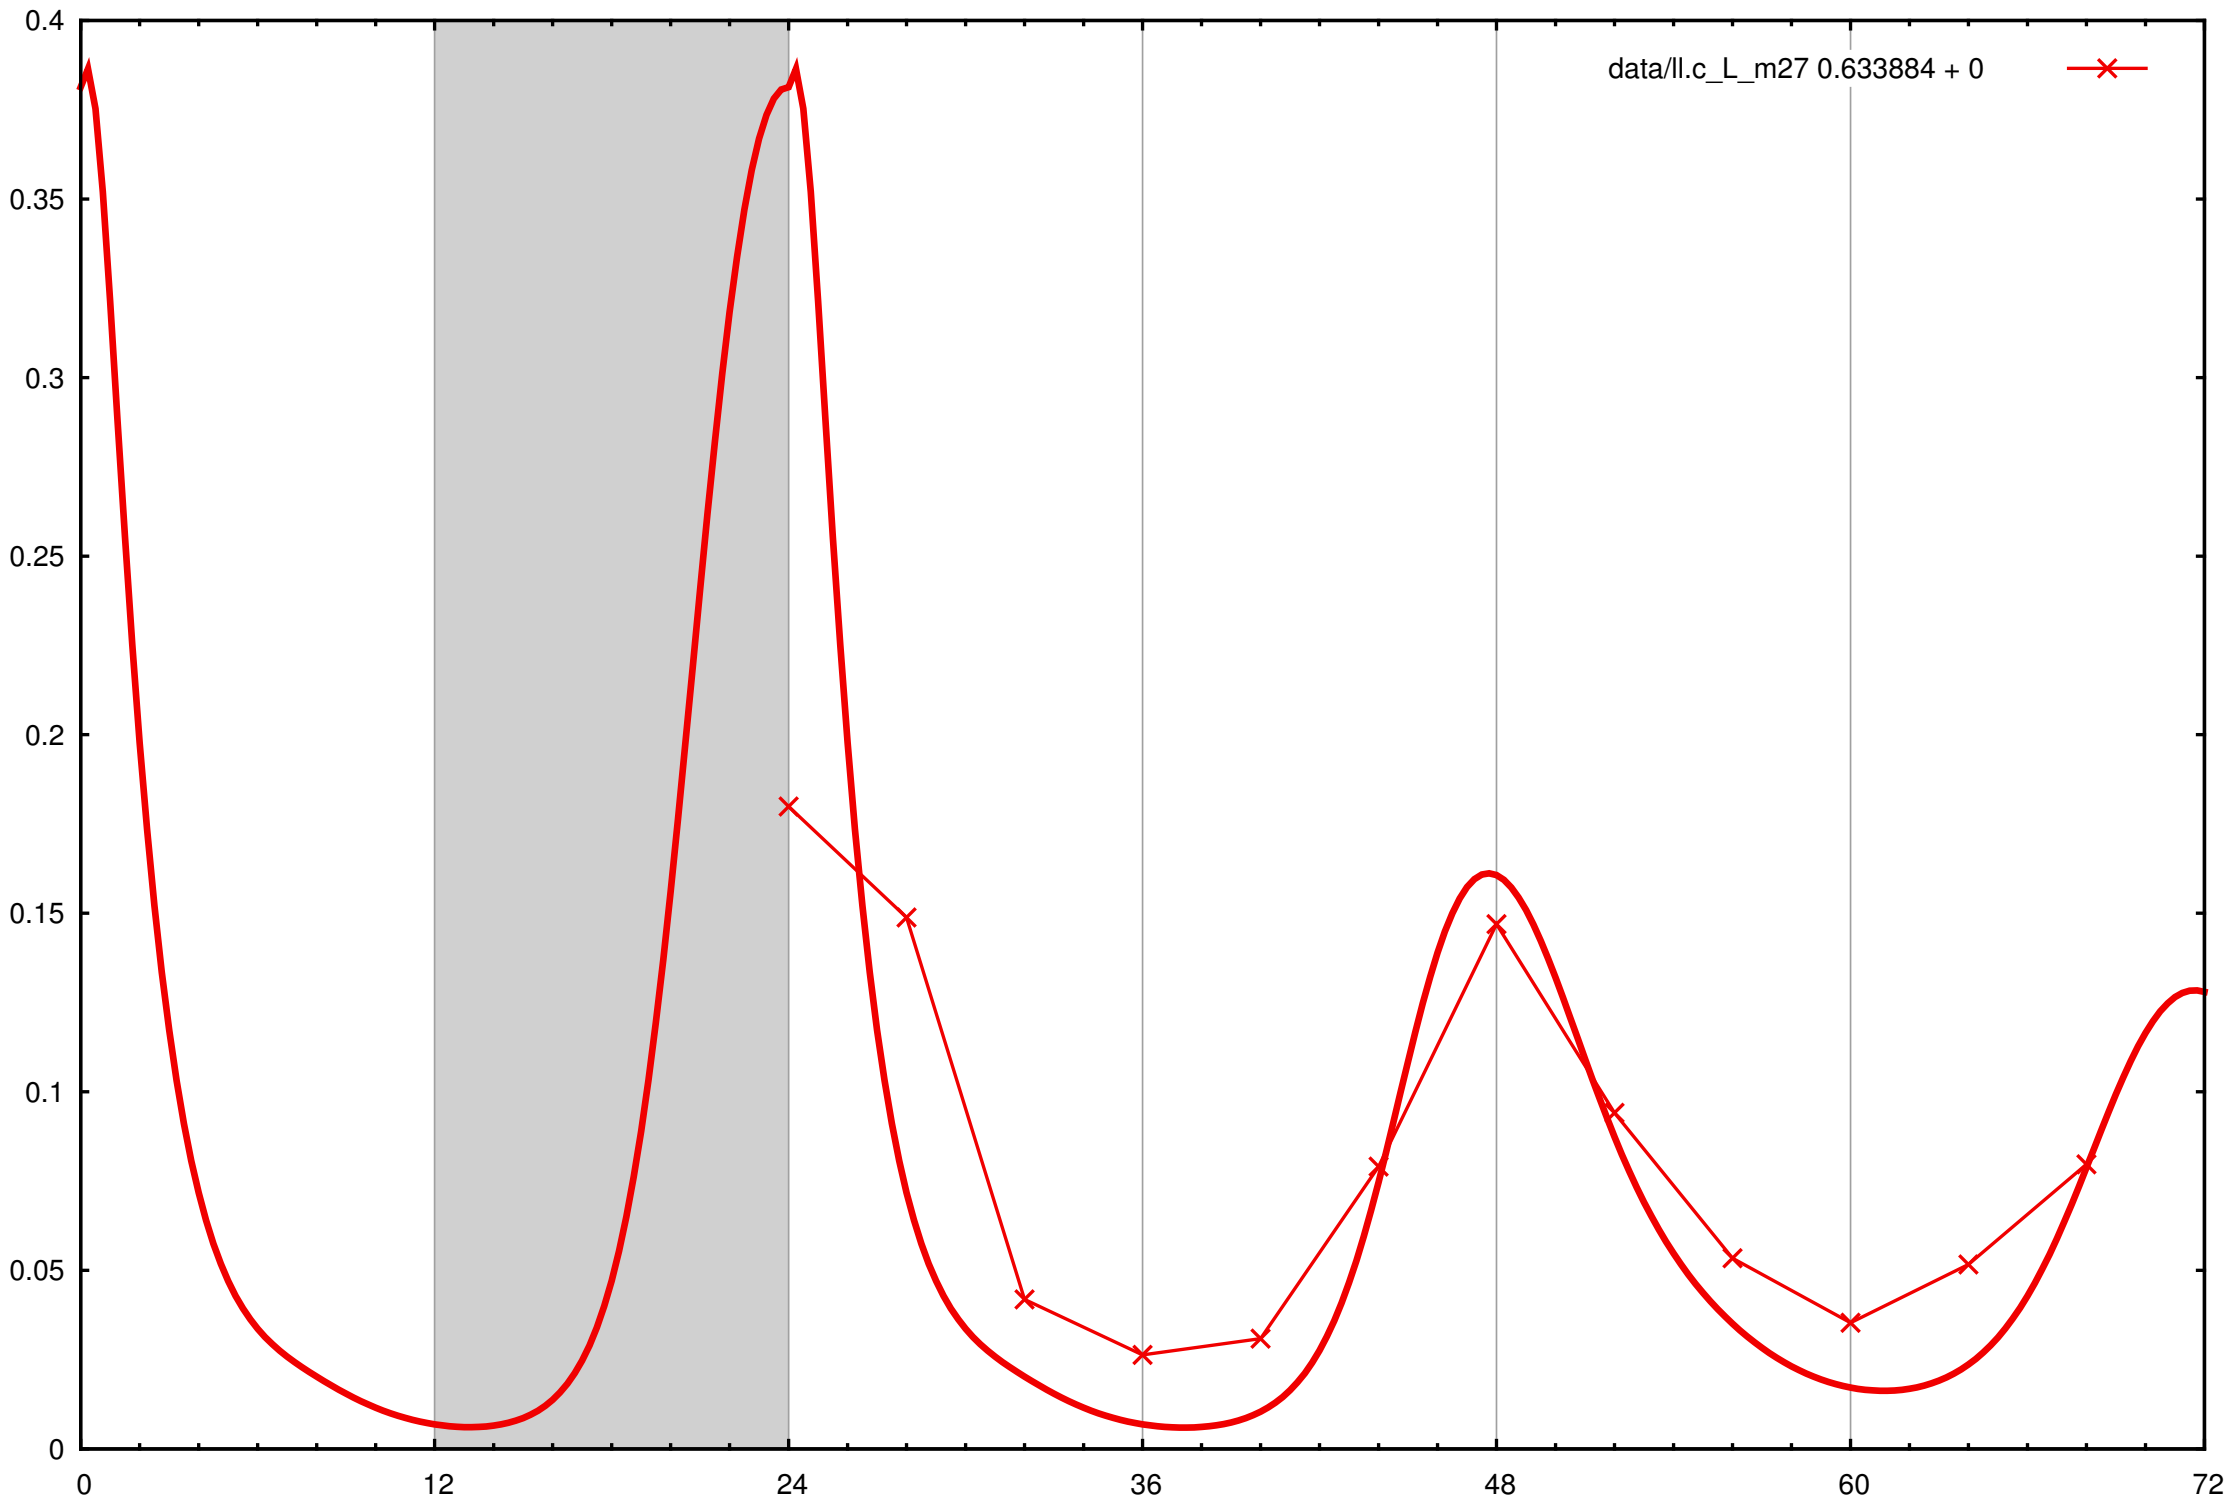

Scale group 244, scost 0

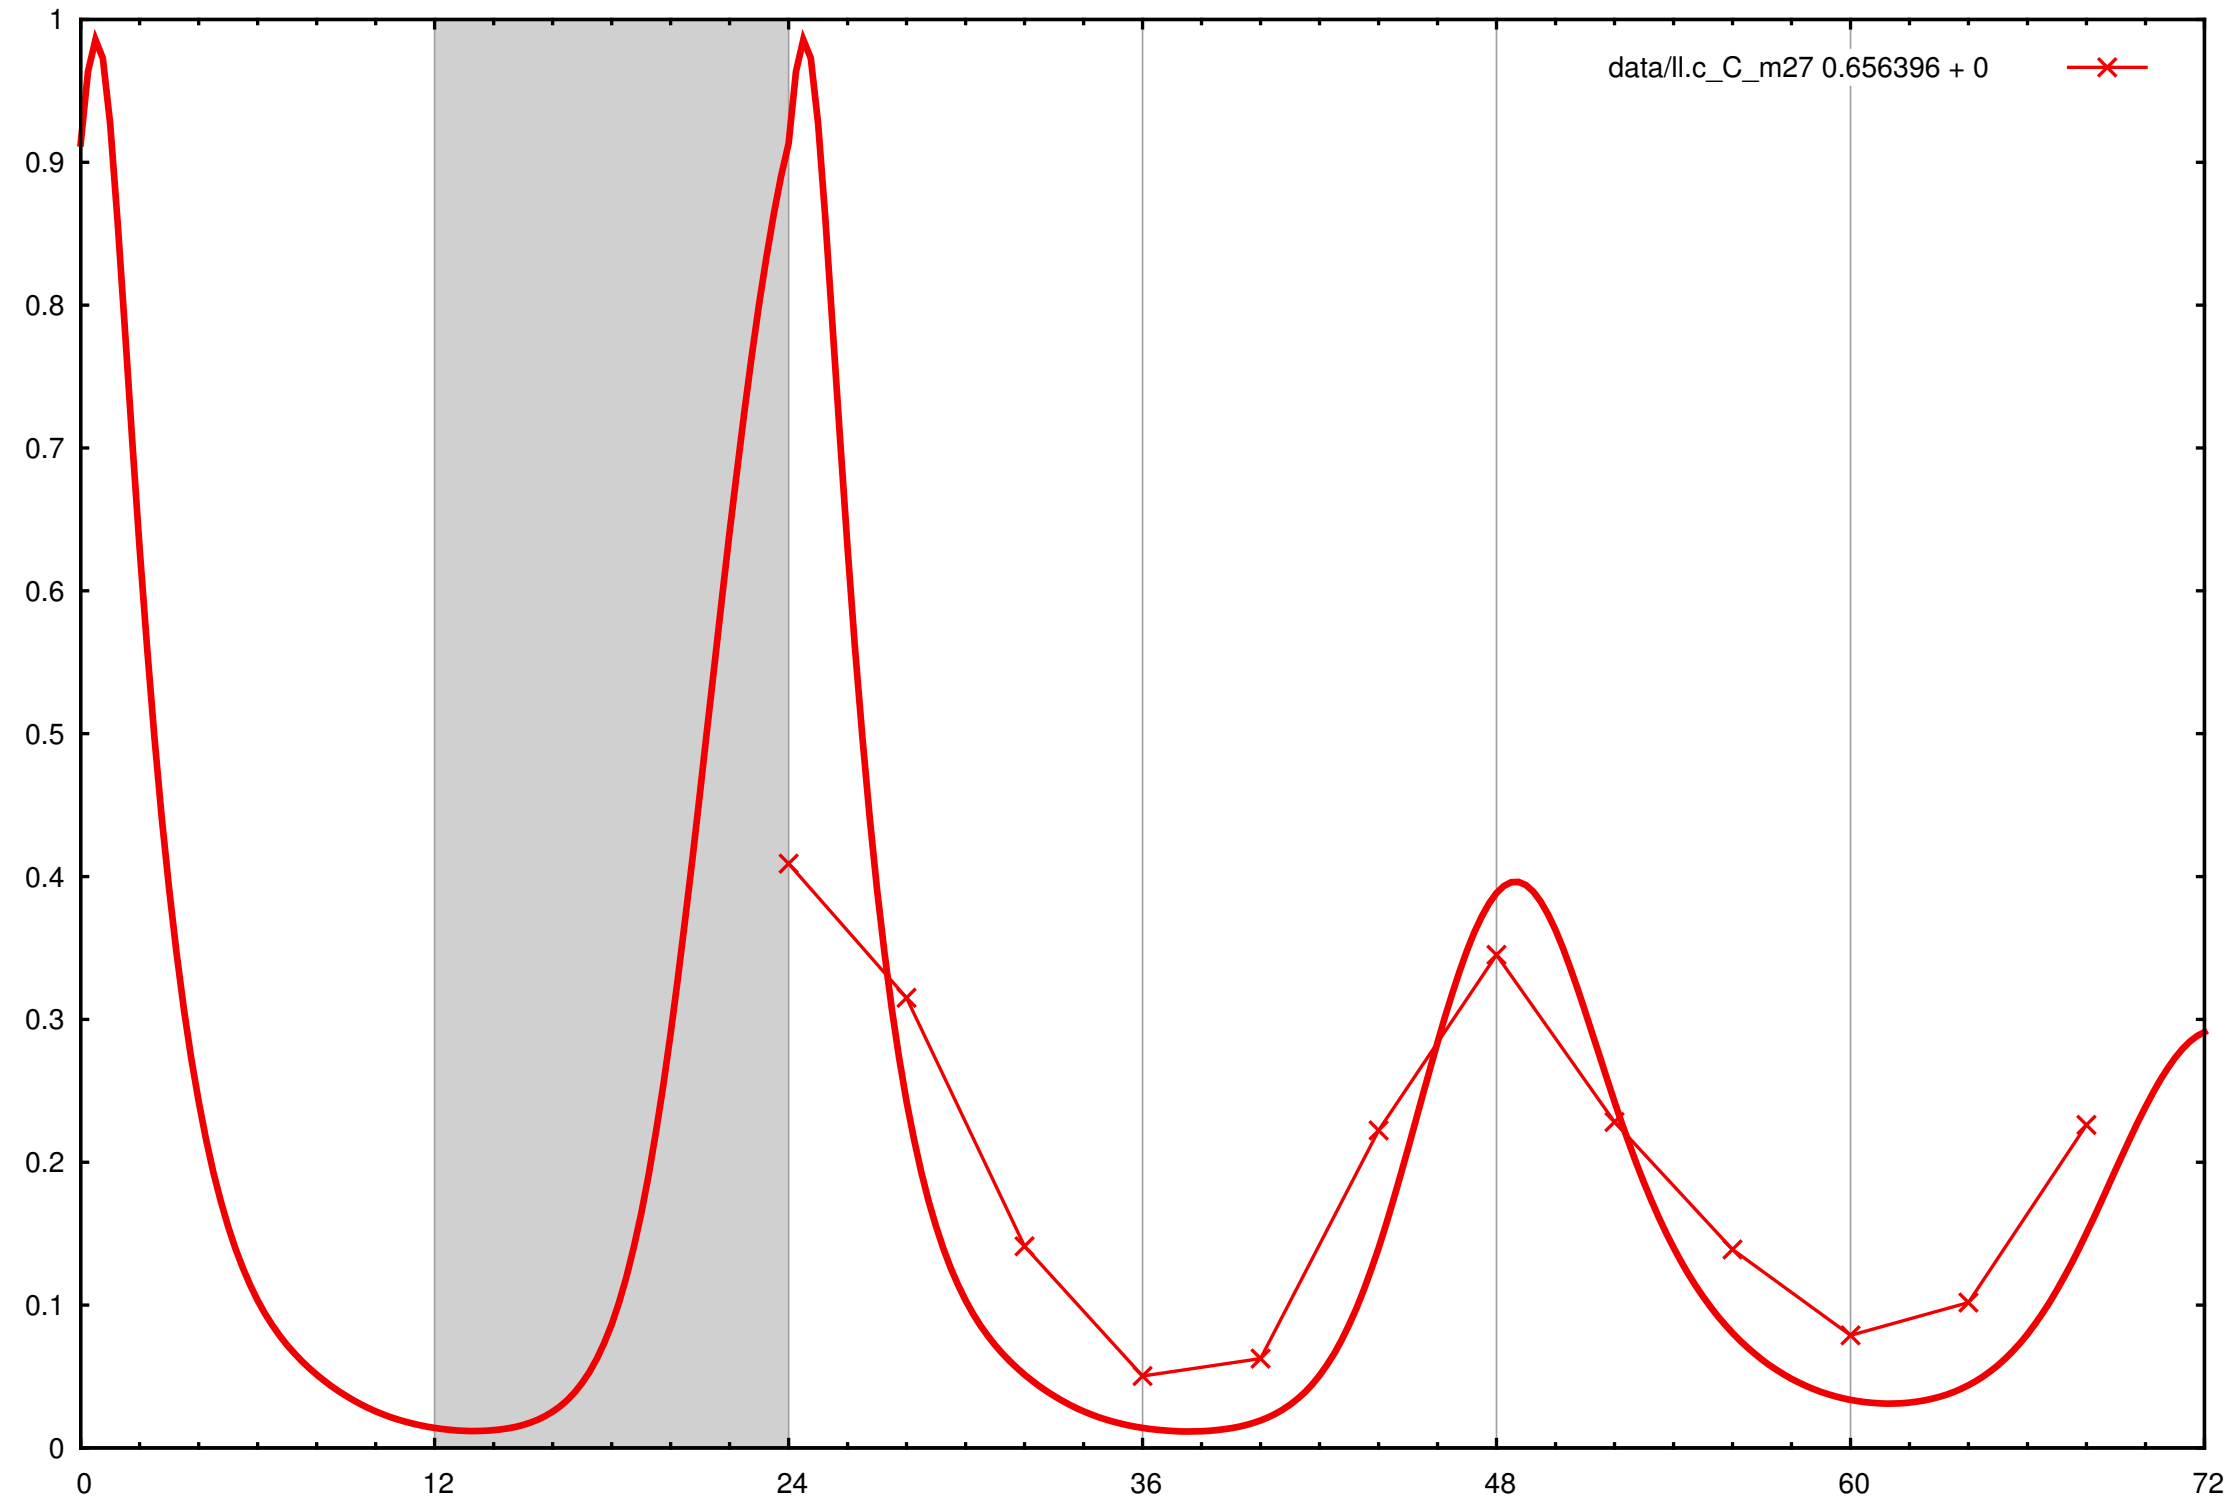

Scale group 245, scost 0.101007

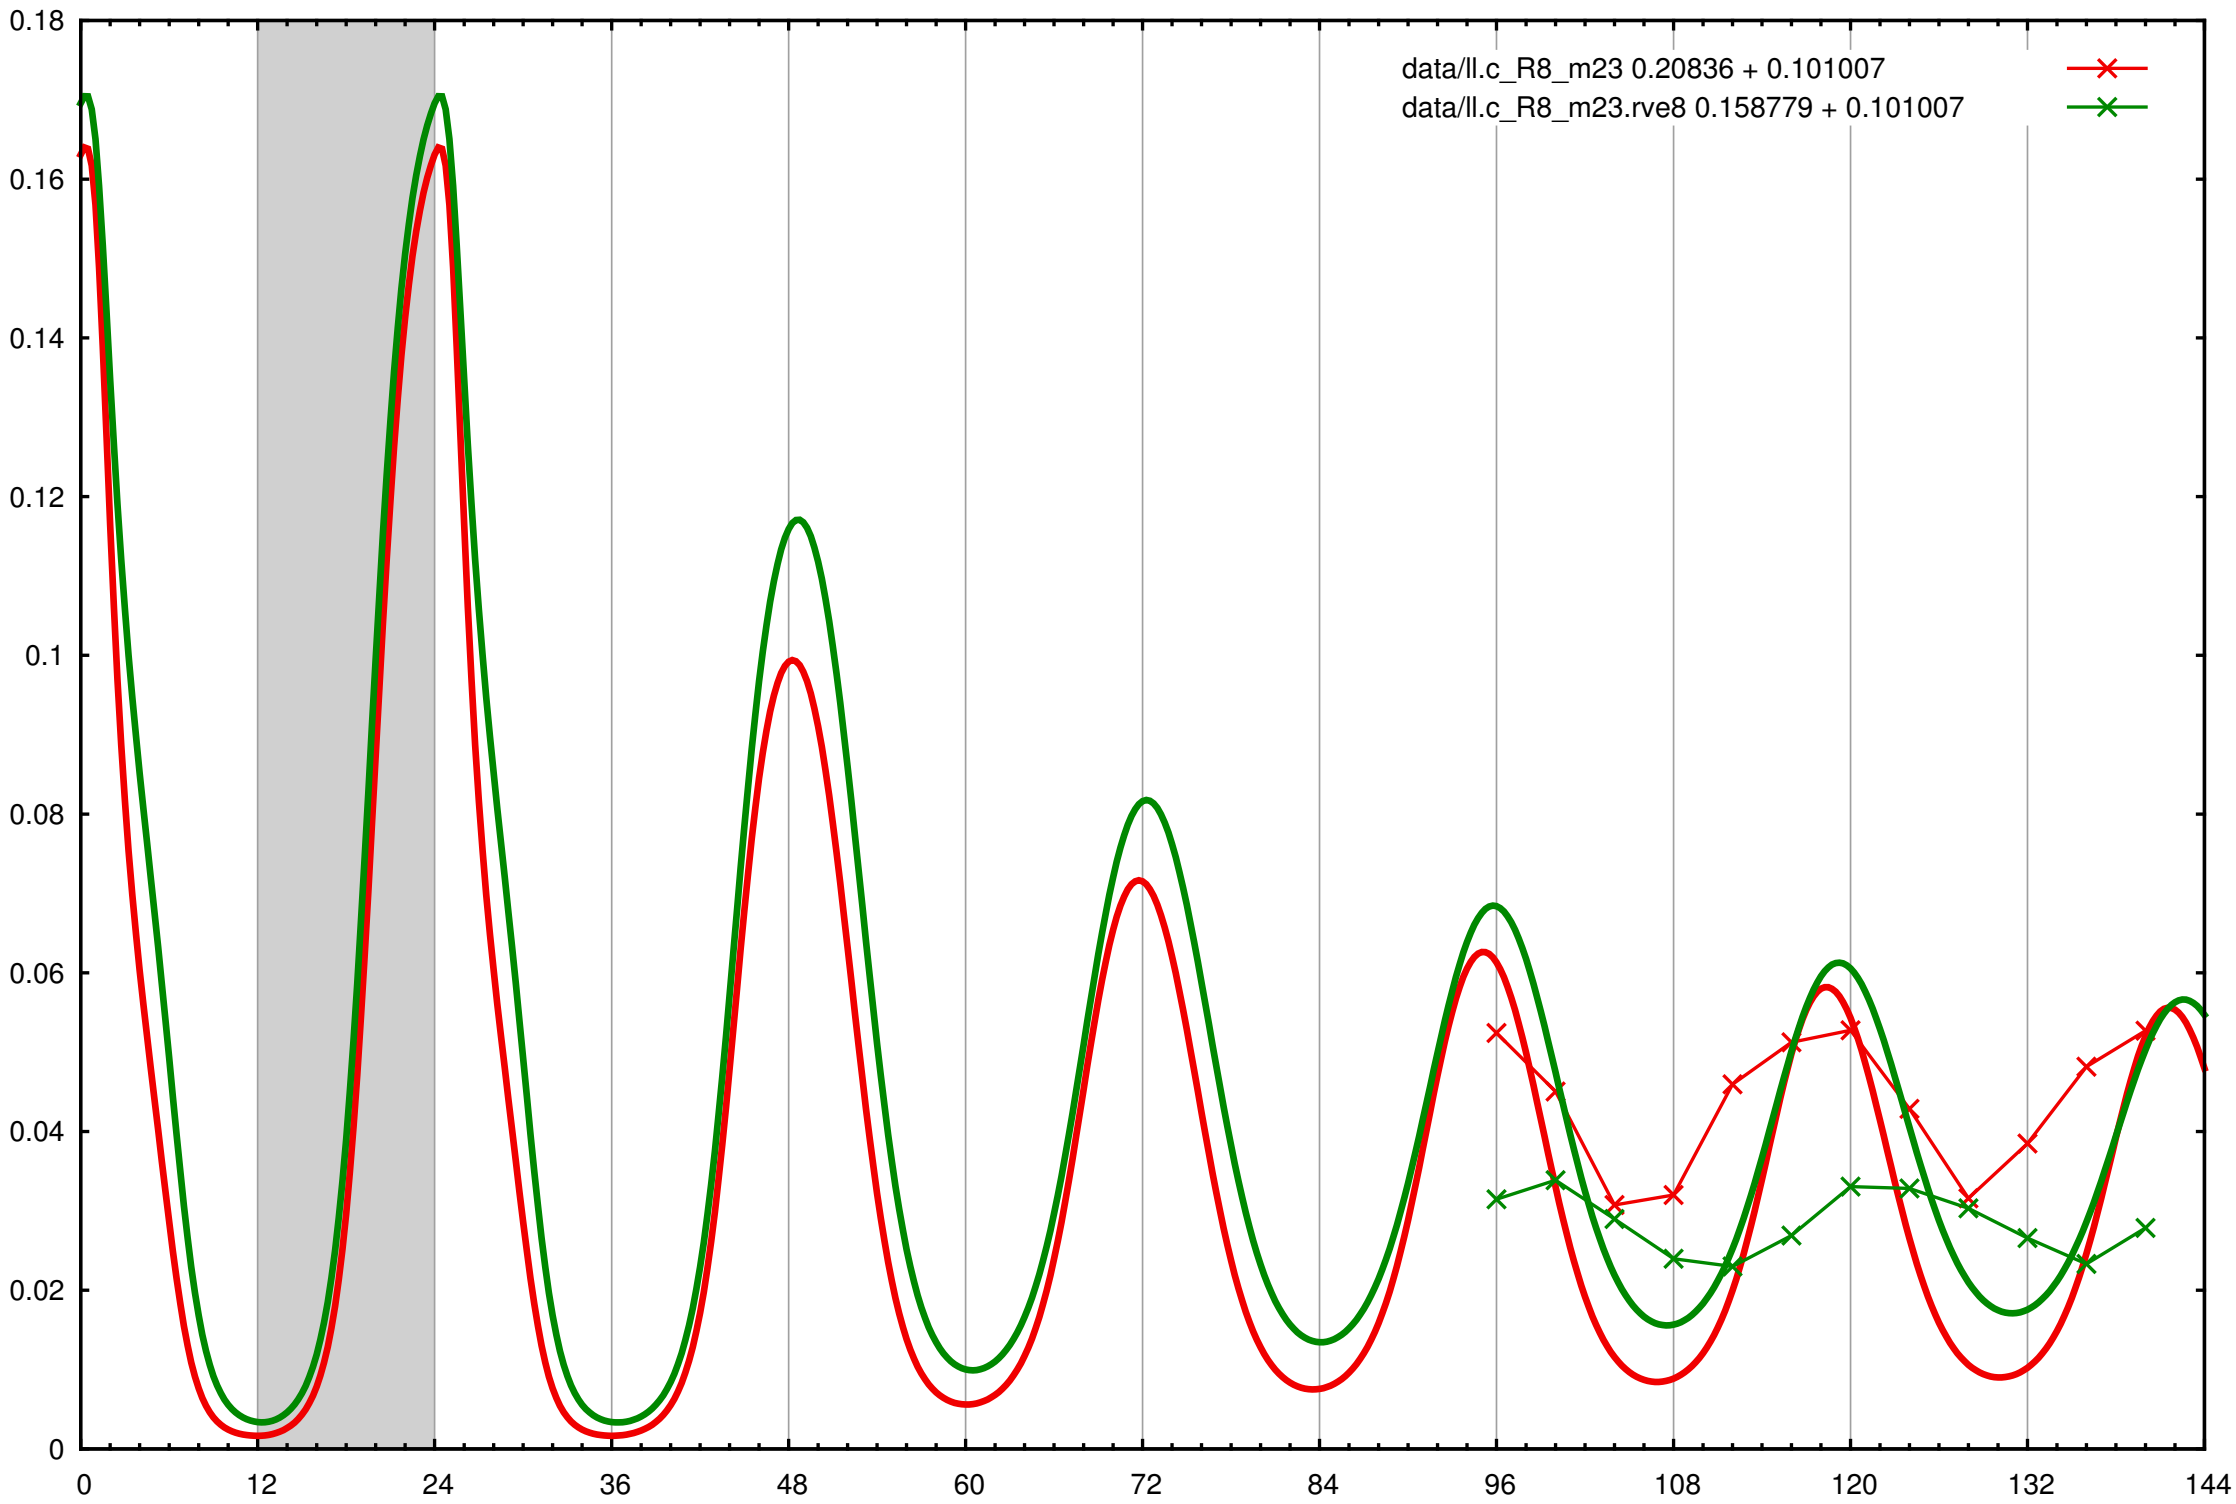

Scale group 246, scost 1.21987e-05

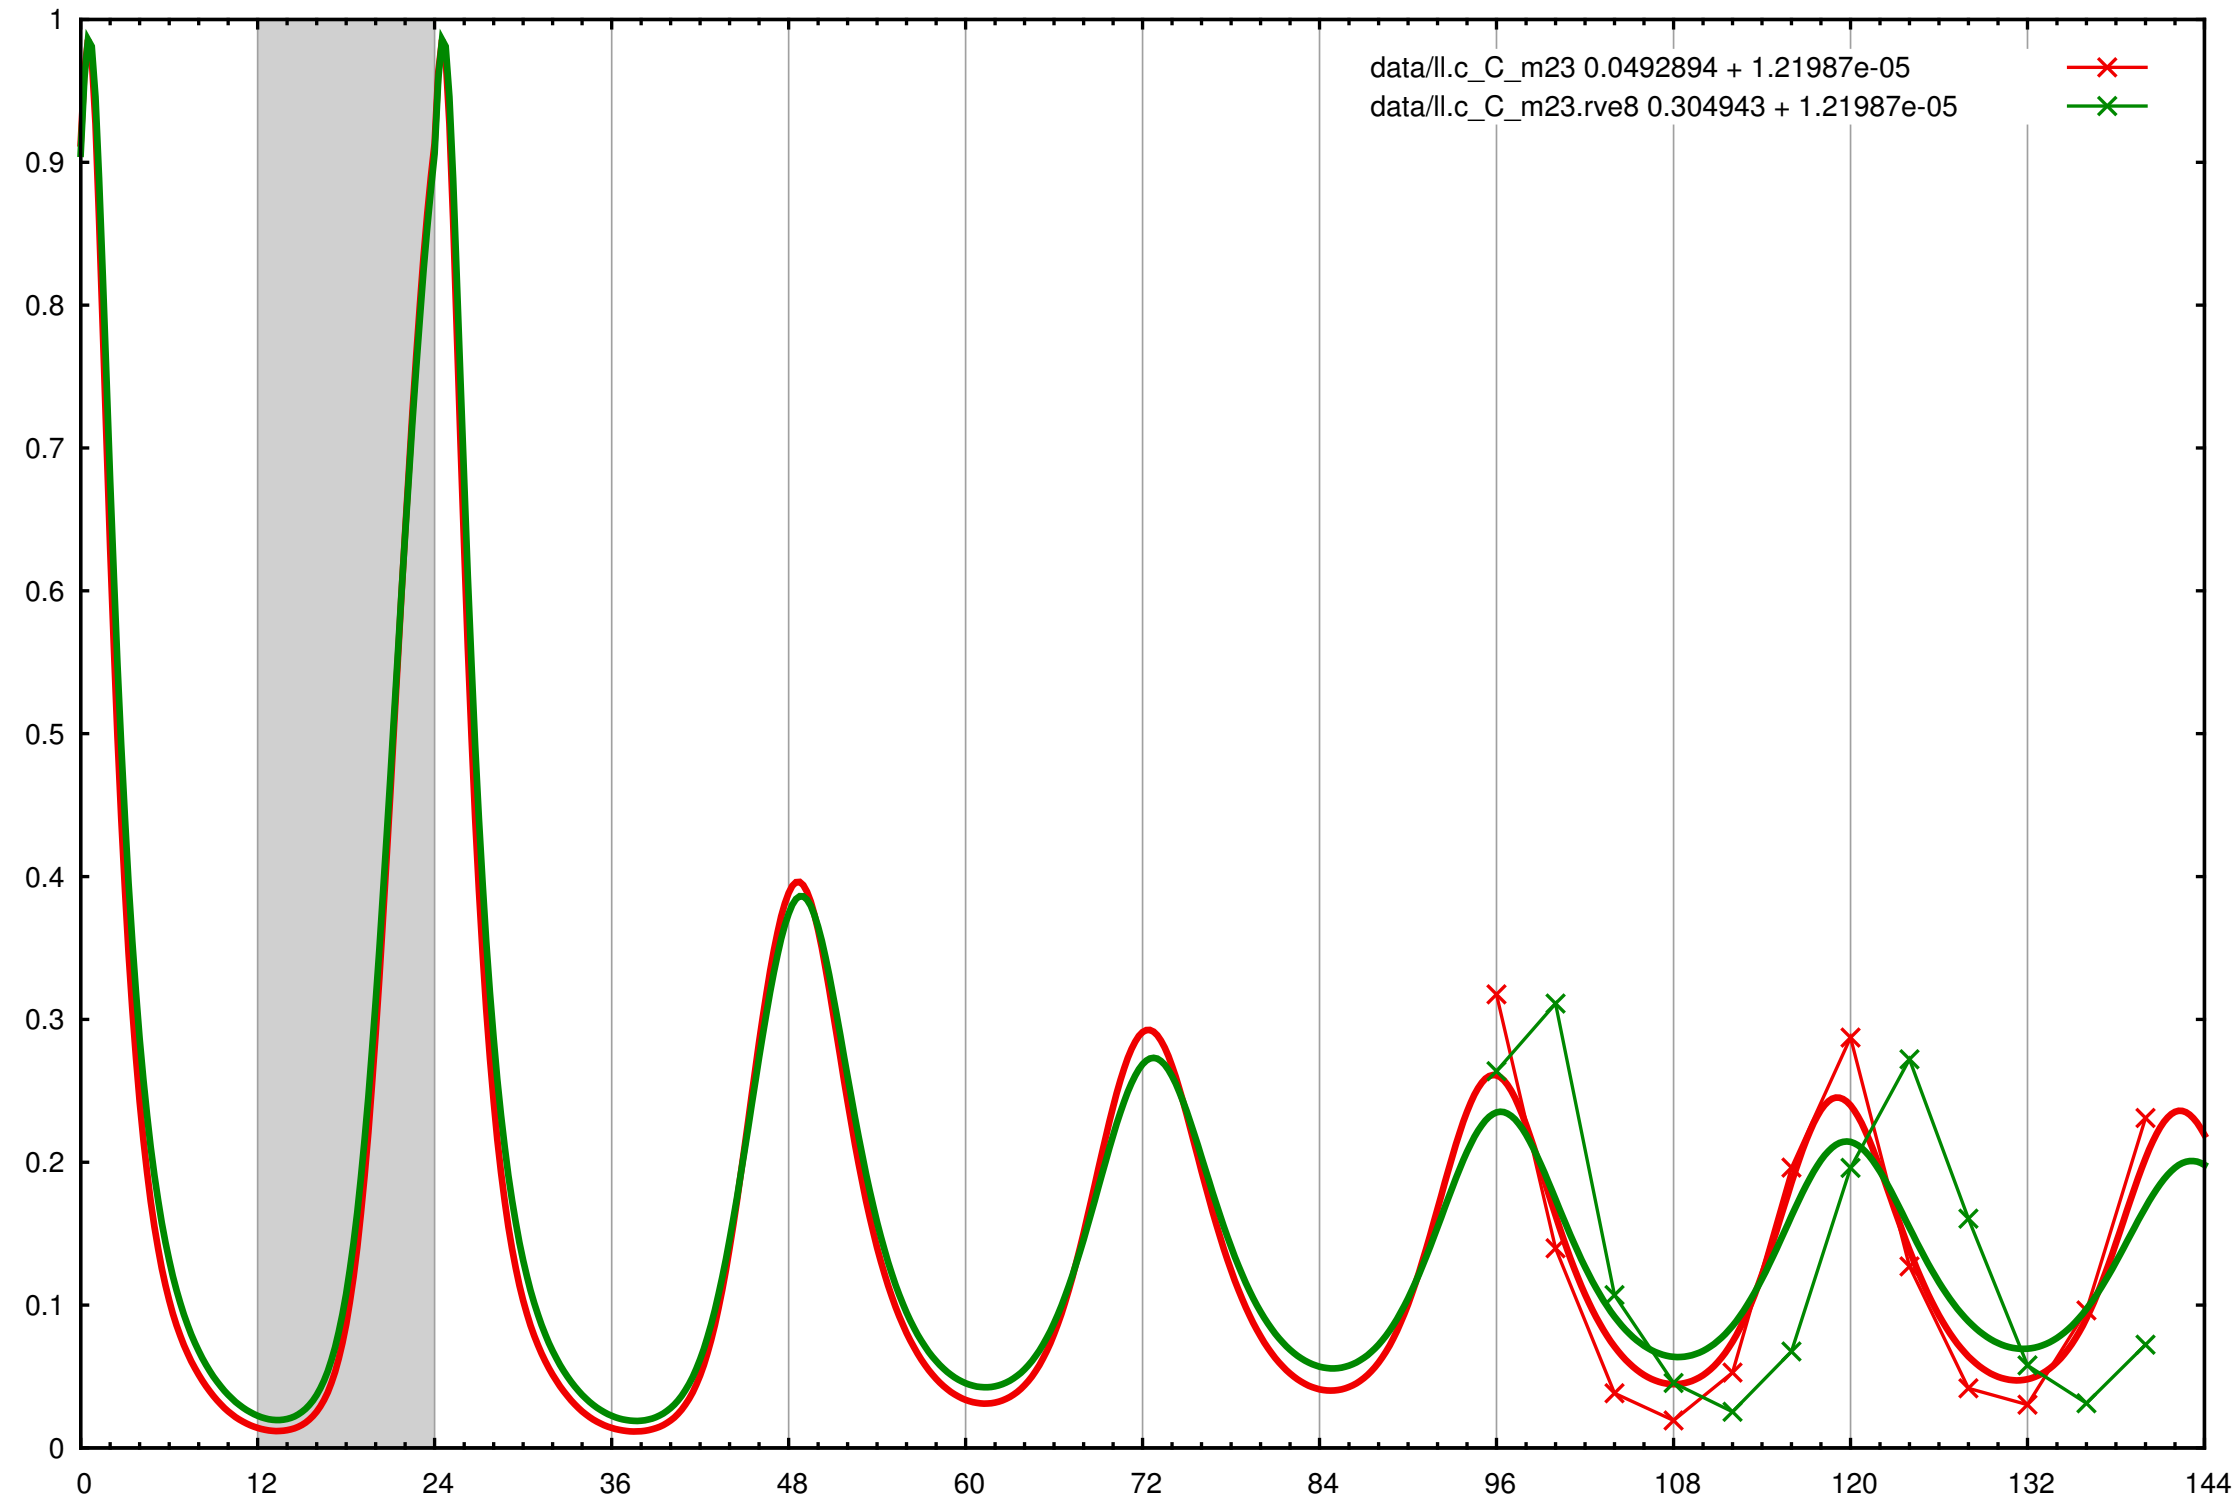

Scale group 247, scost 0.000197217

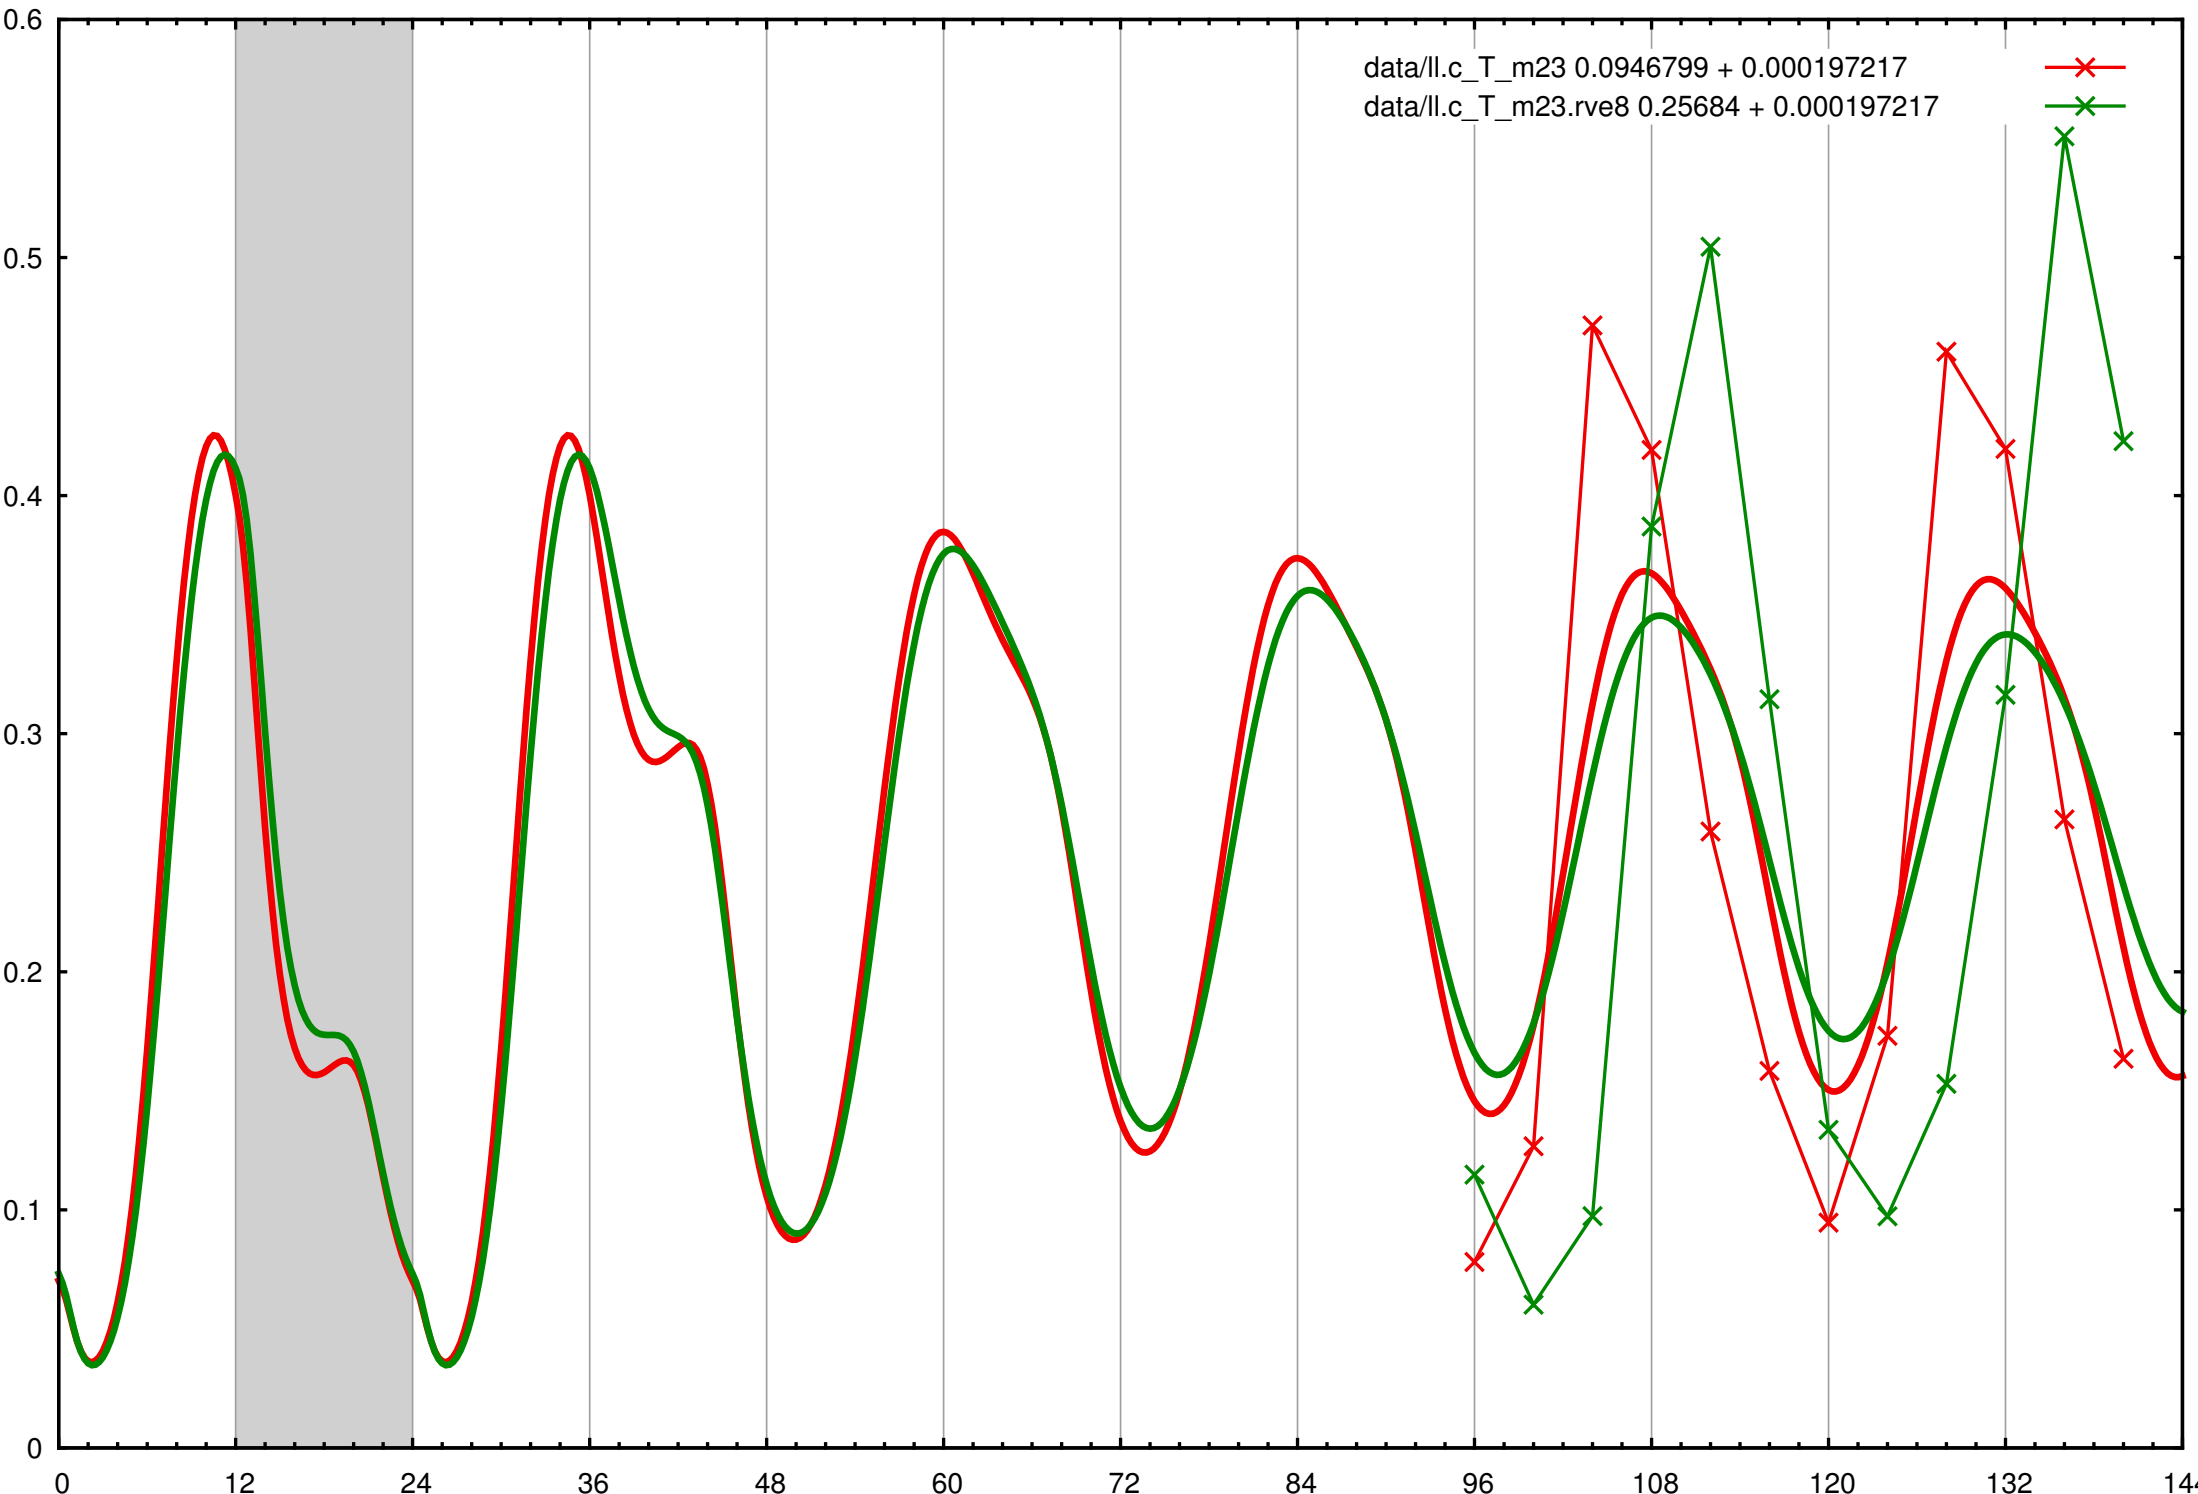

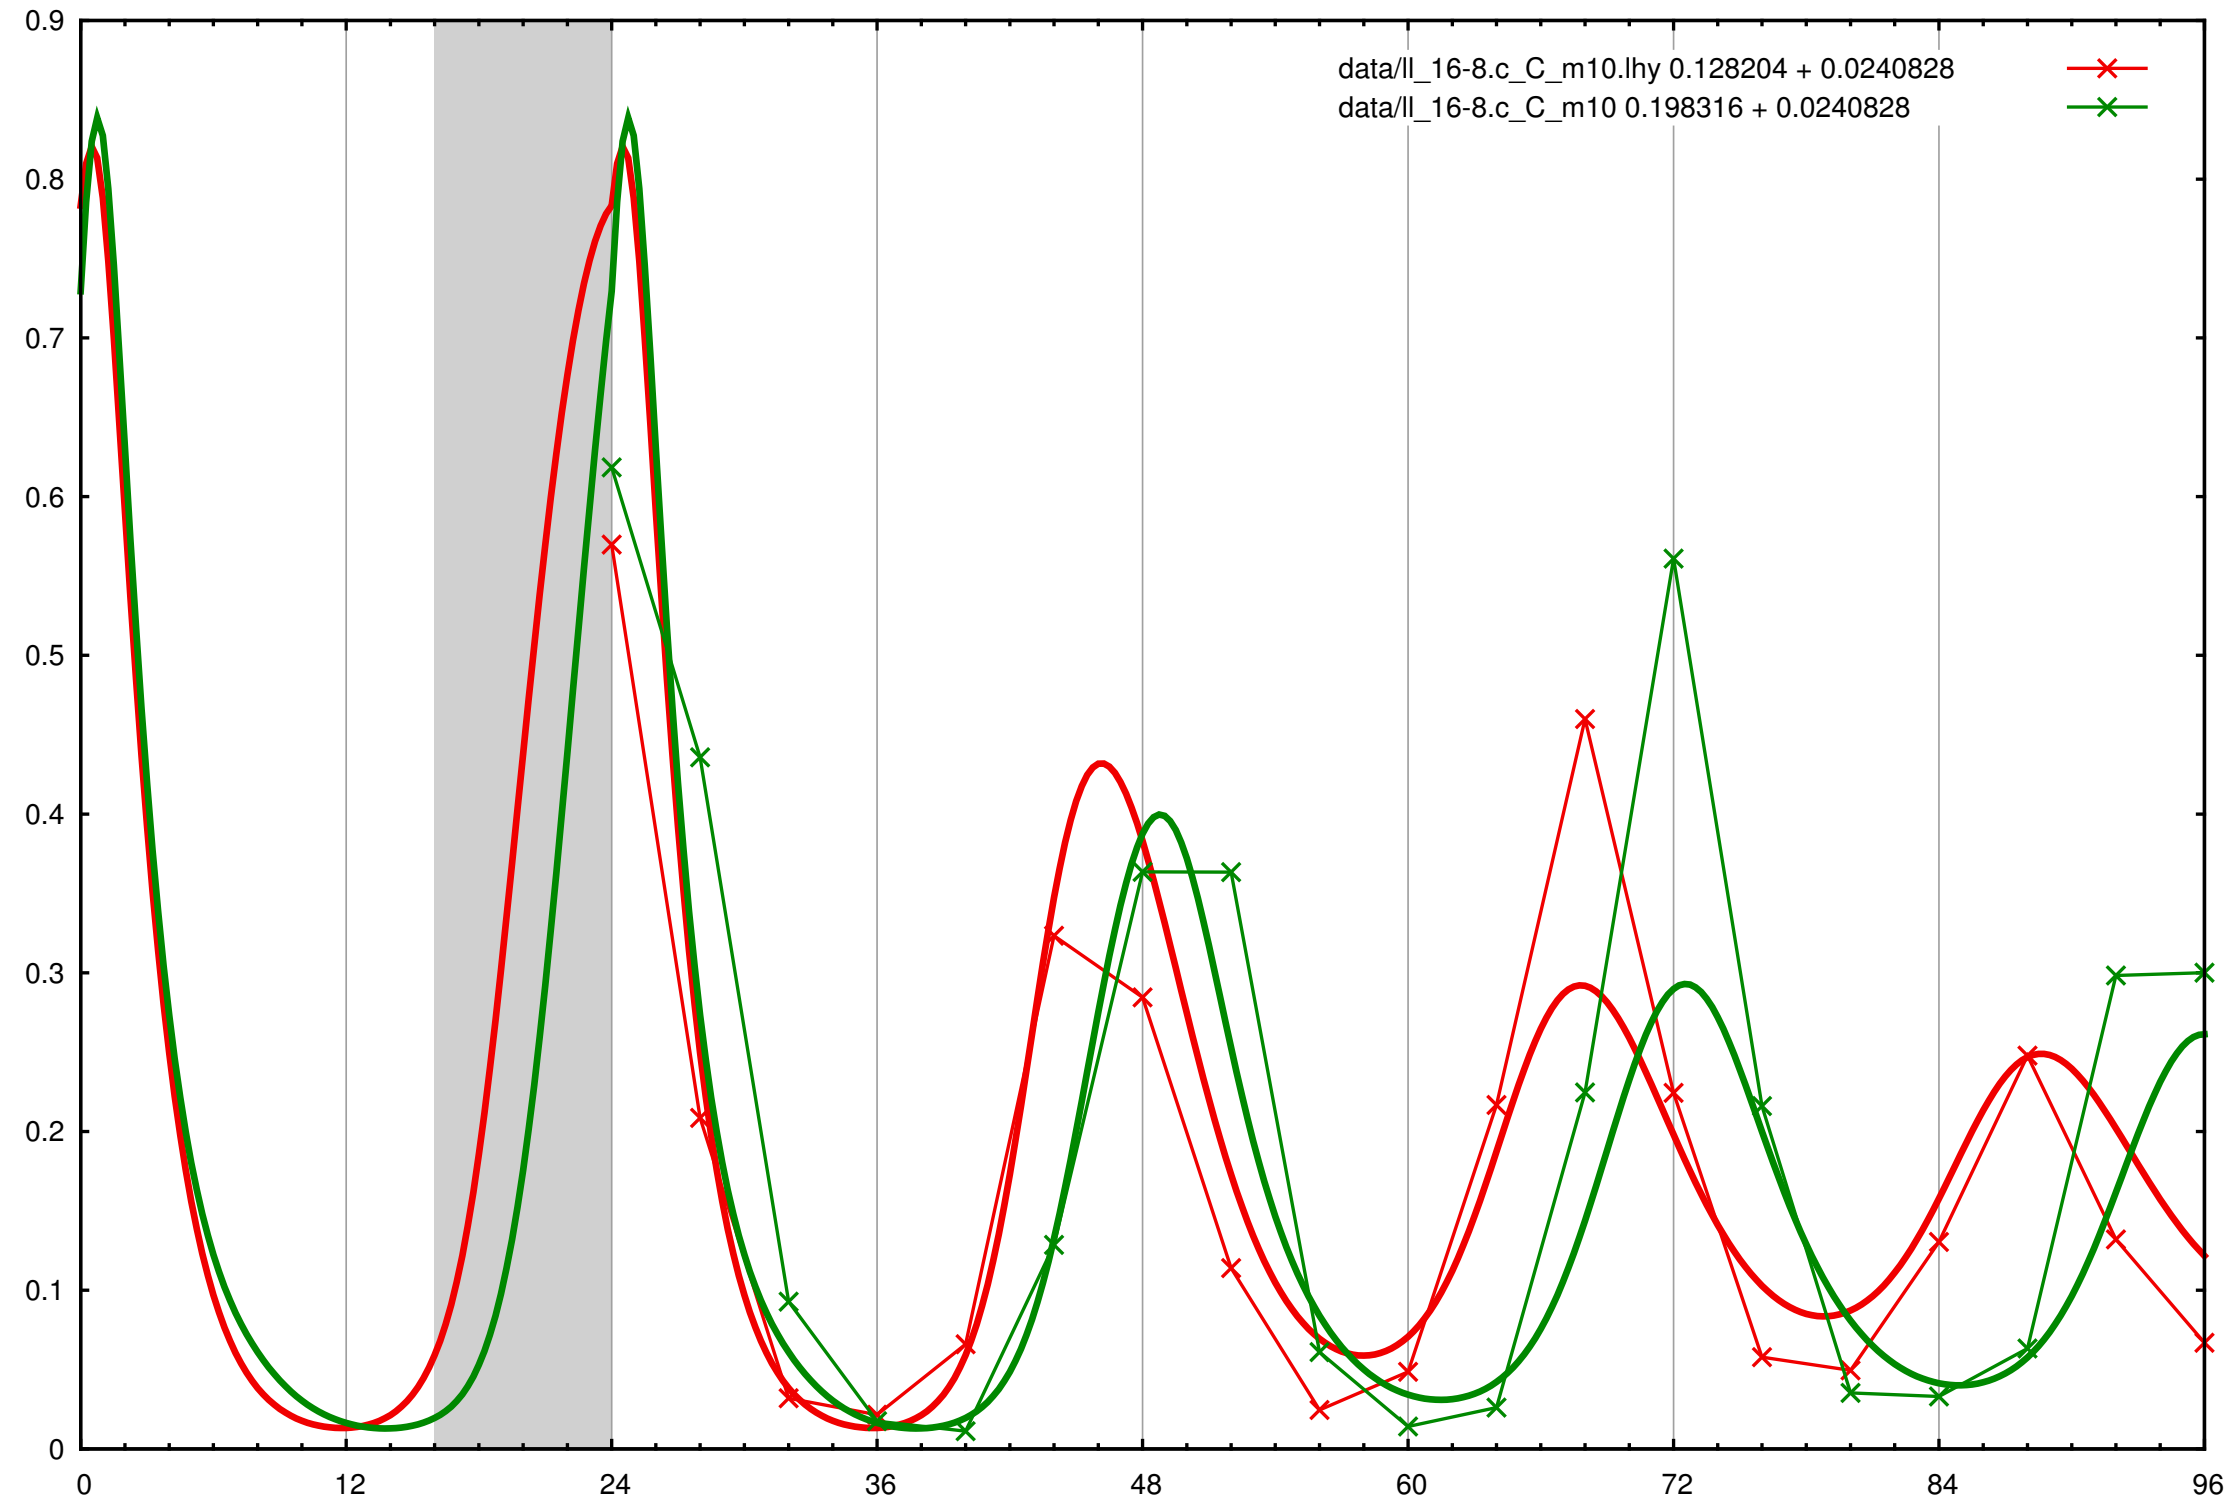



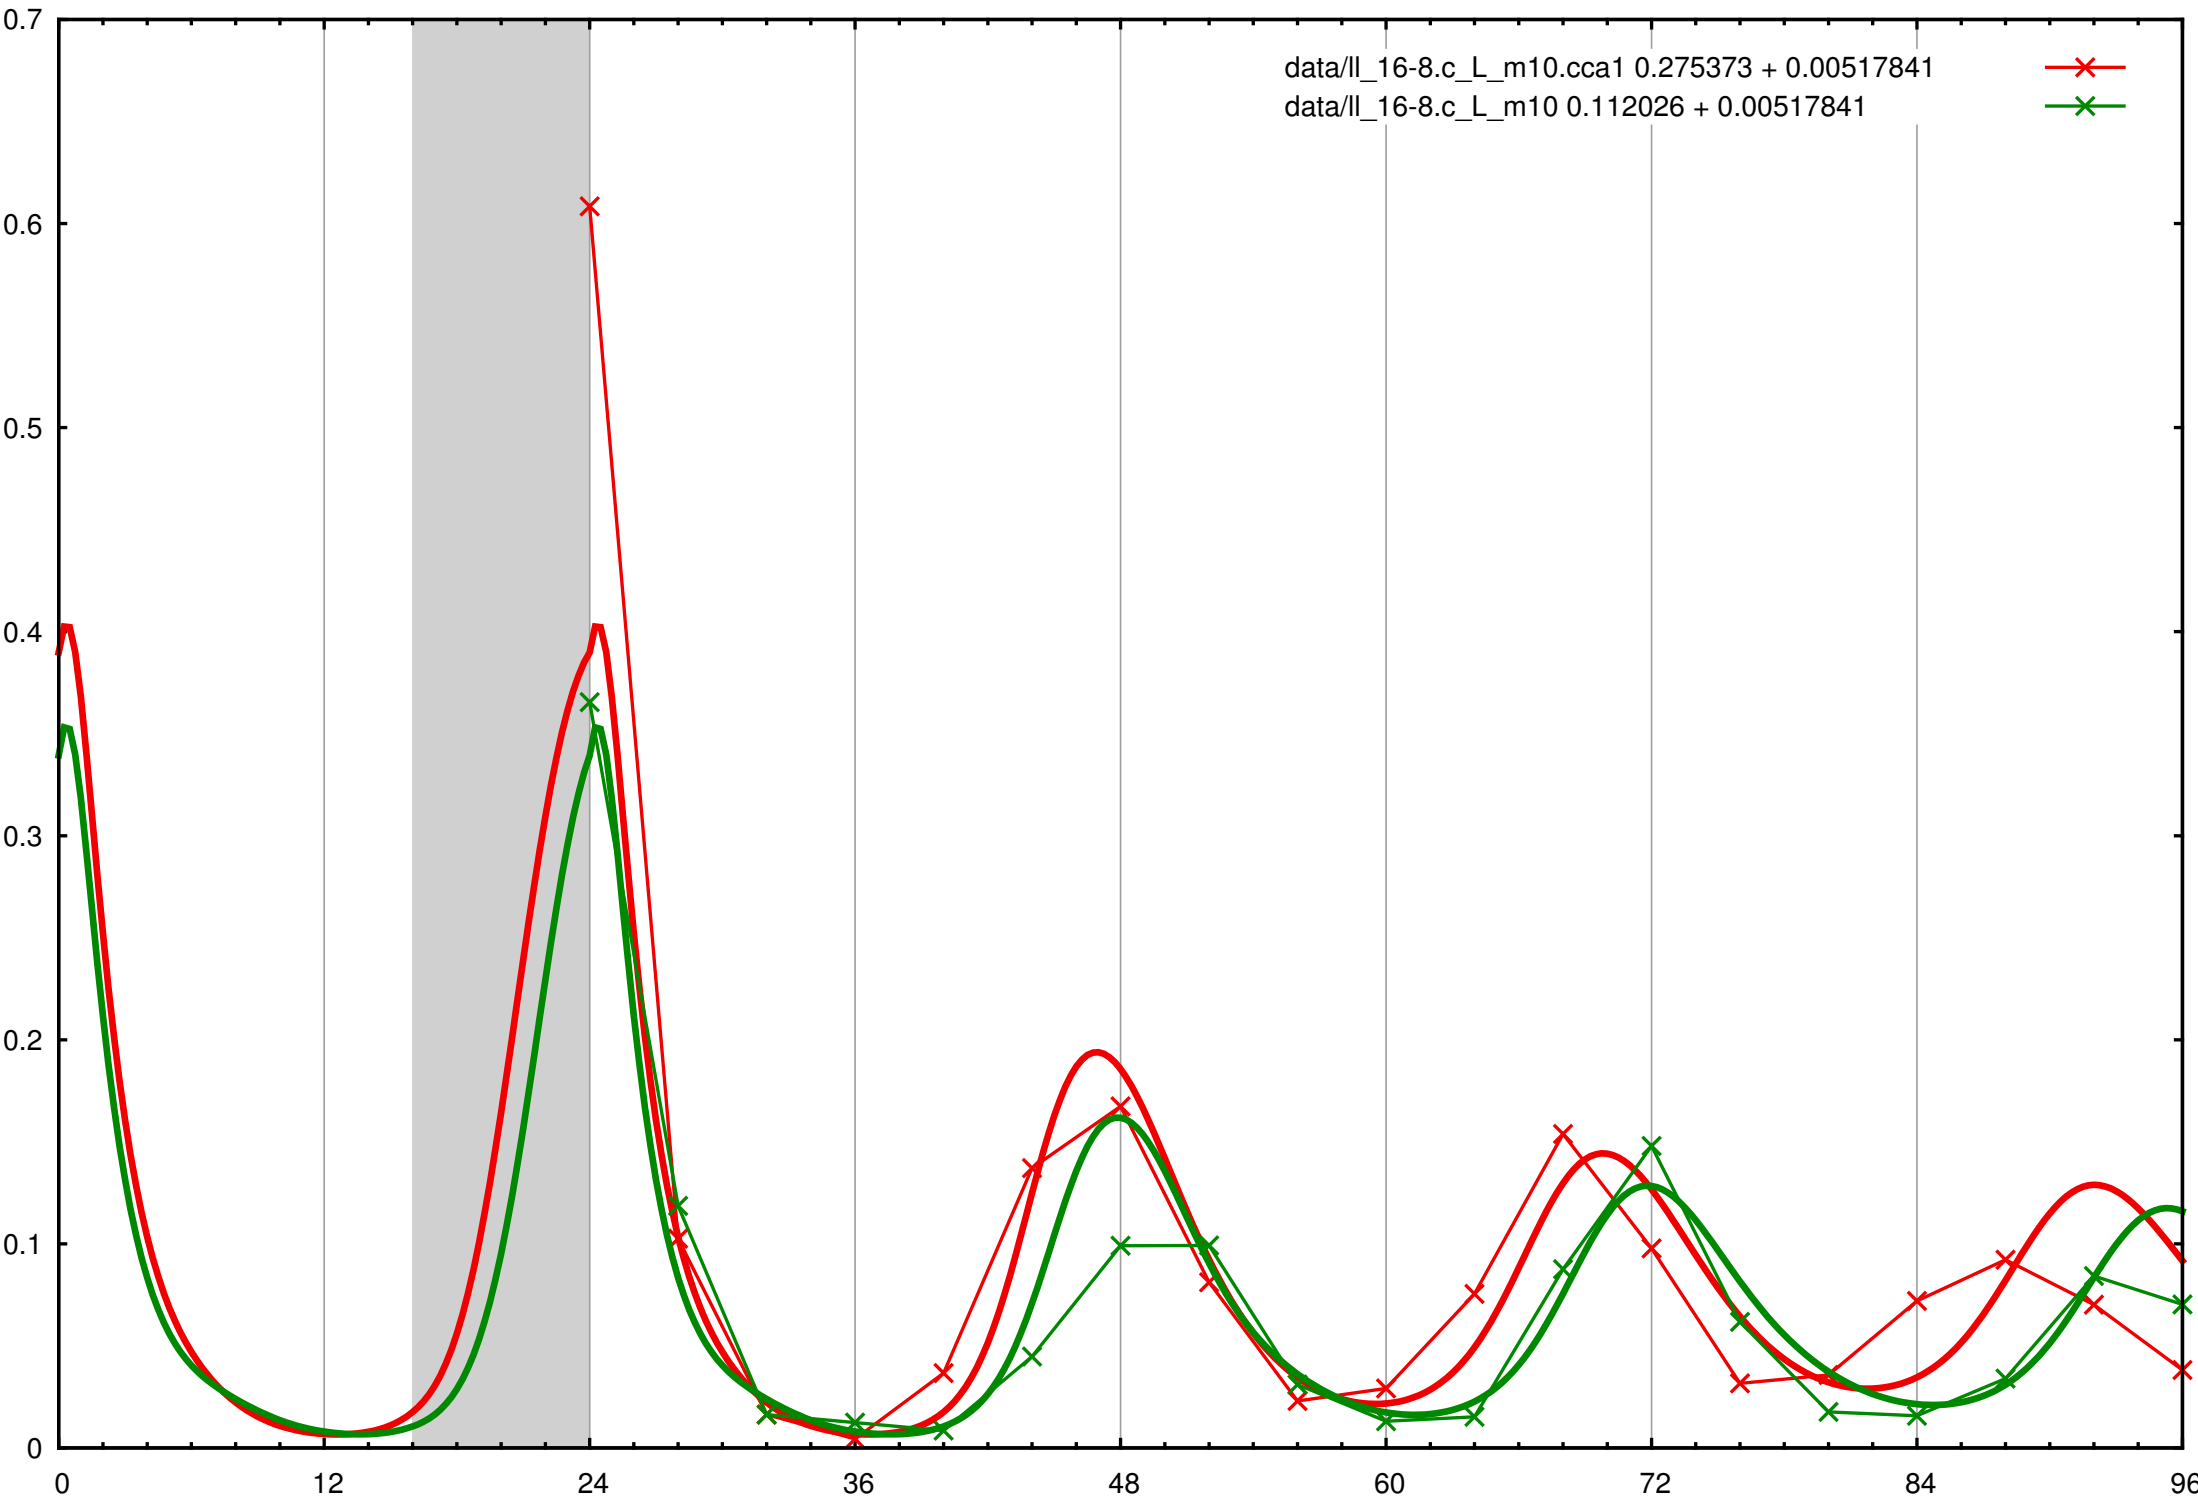

data//l\_16-8.c\_L\_m10.cca1 0.275373 + 0.00517841  
data//l\_16-8.c\_L\_m10 0.112026 + 0.00517841

x  
x

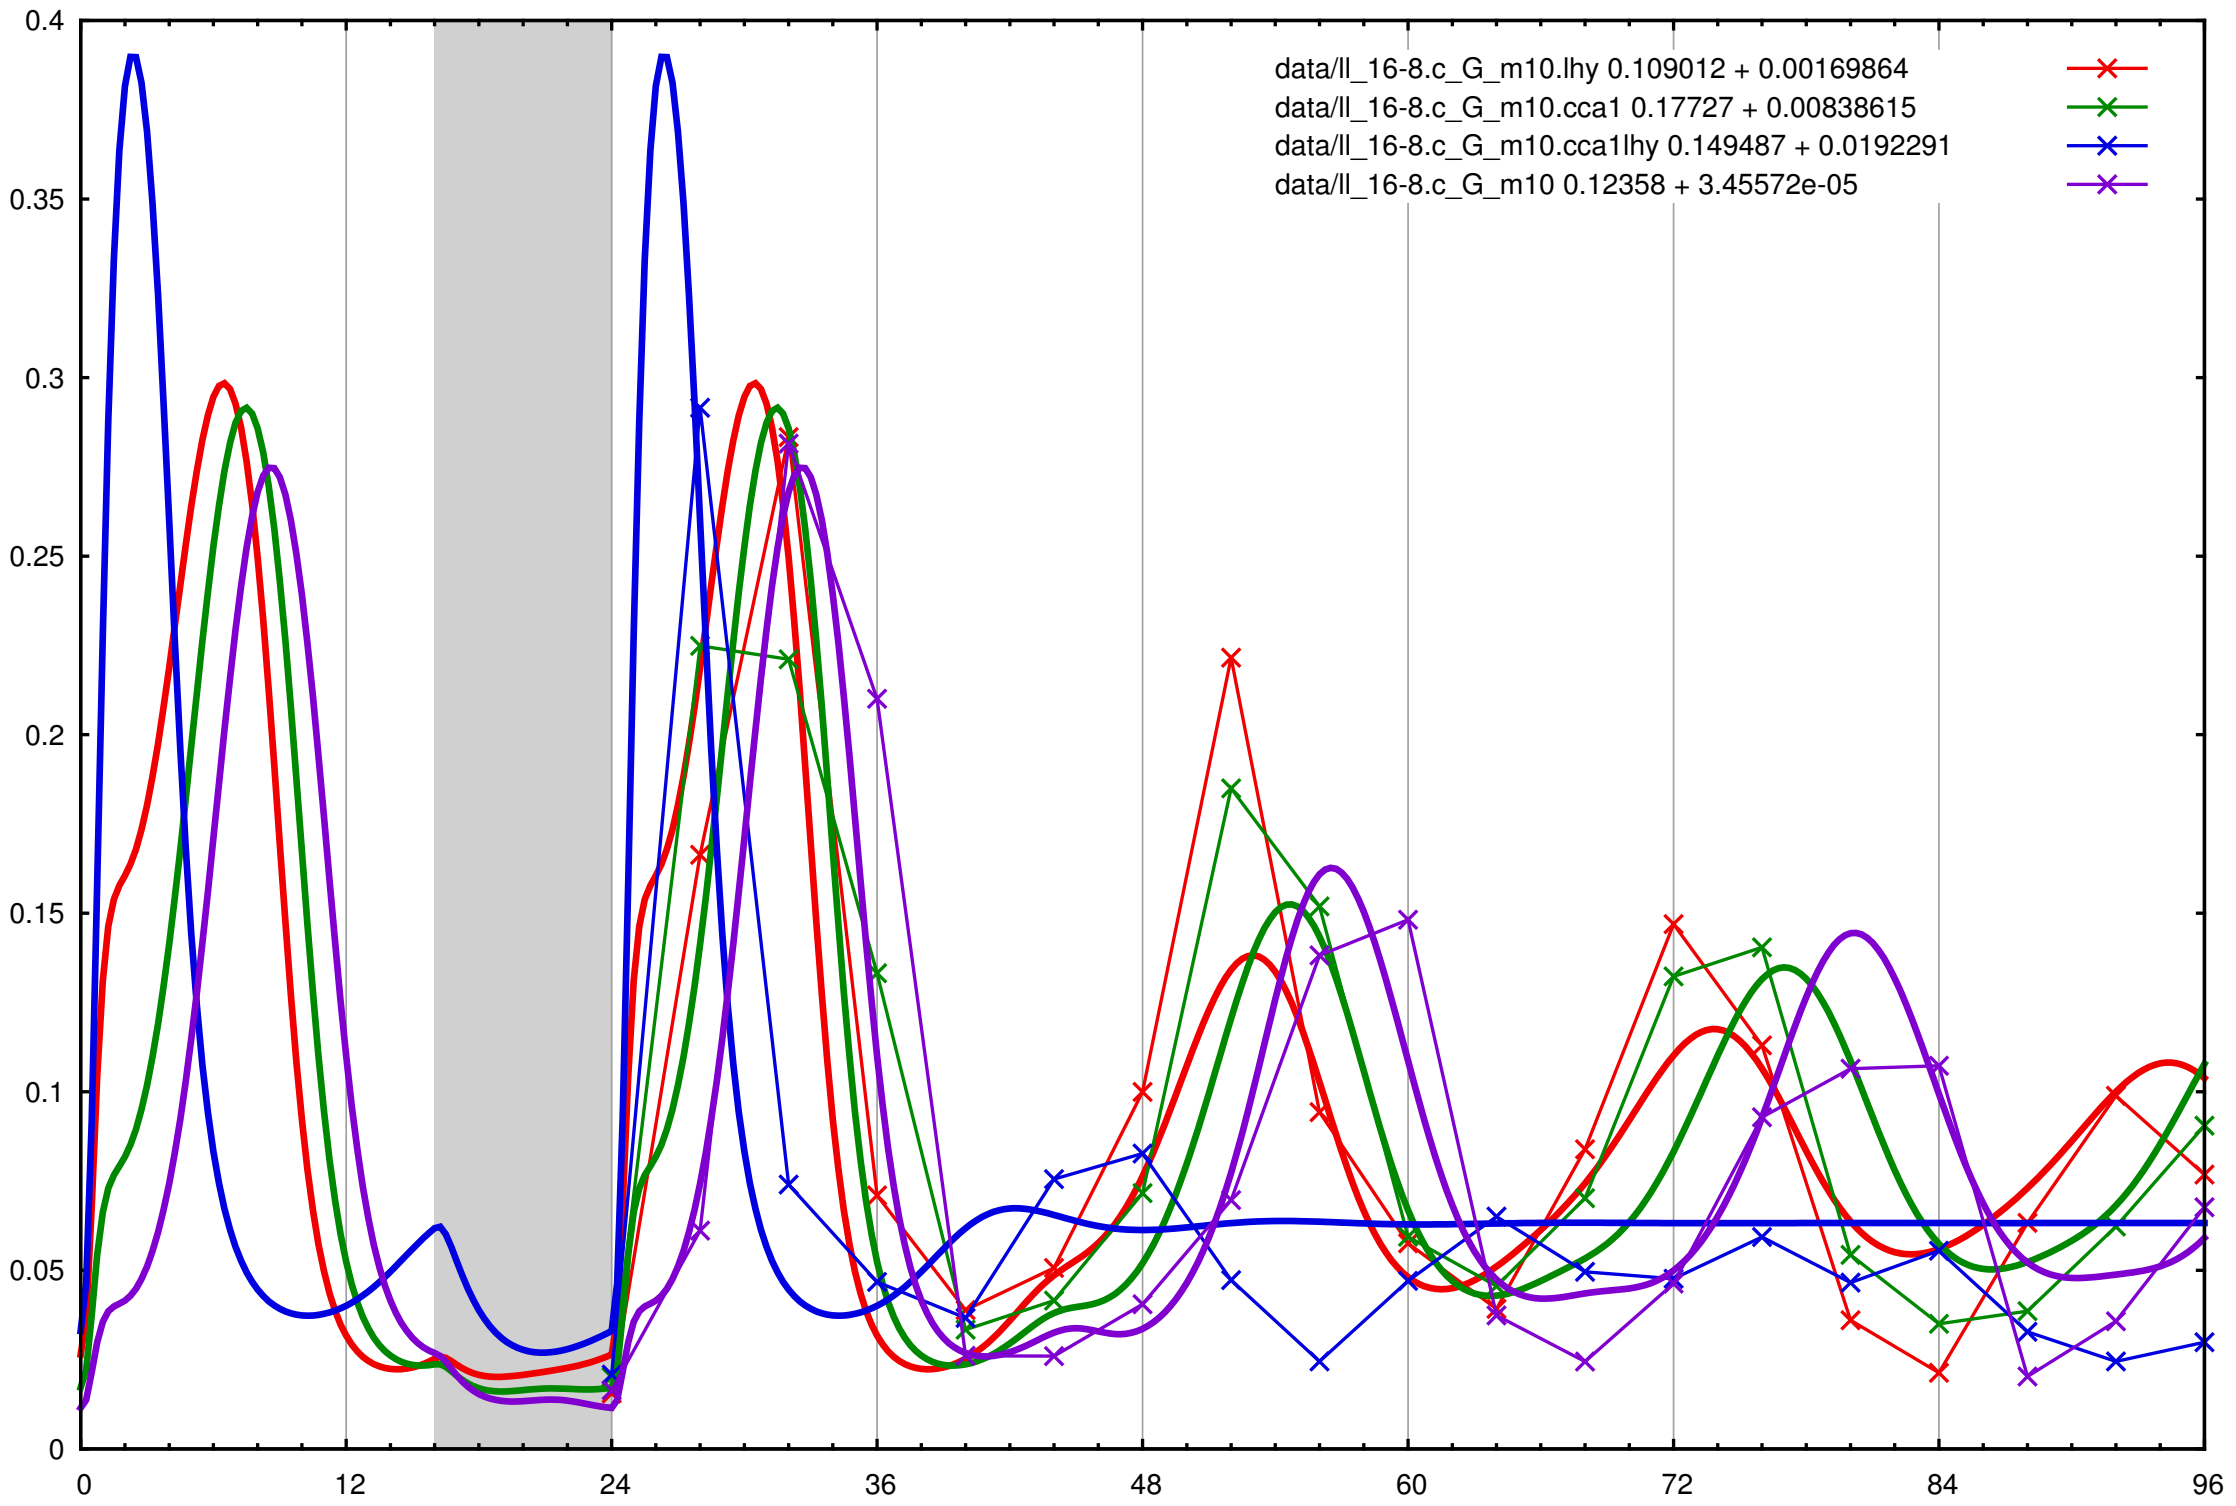

Scale group 251, scost 0.0135922

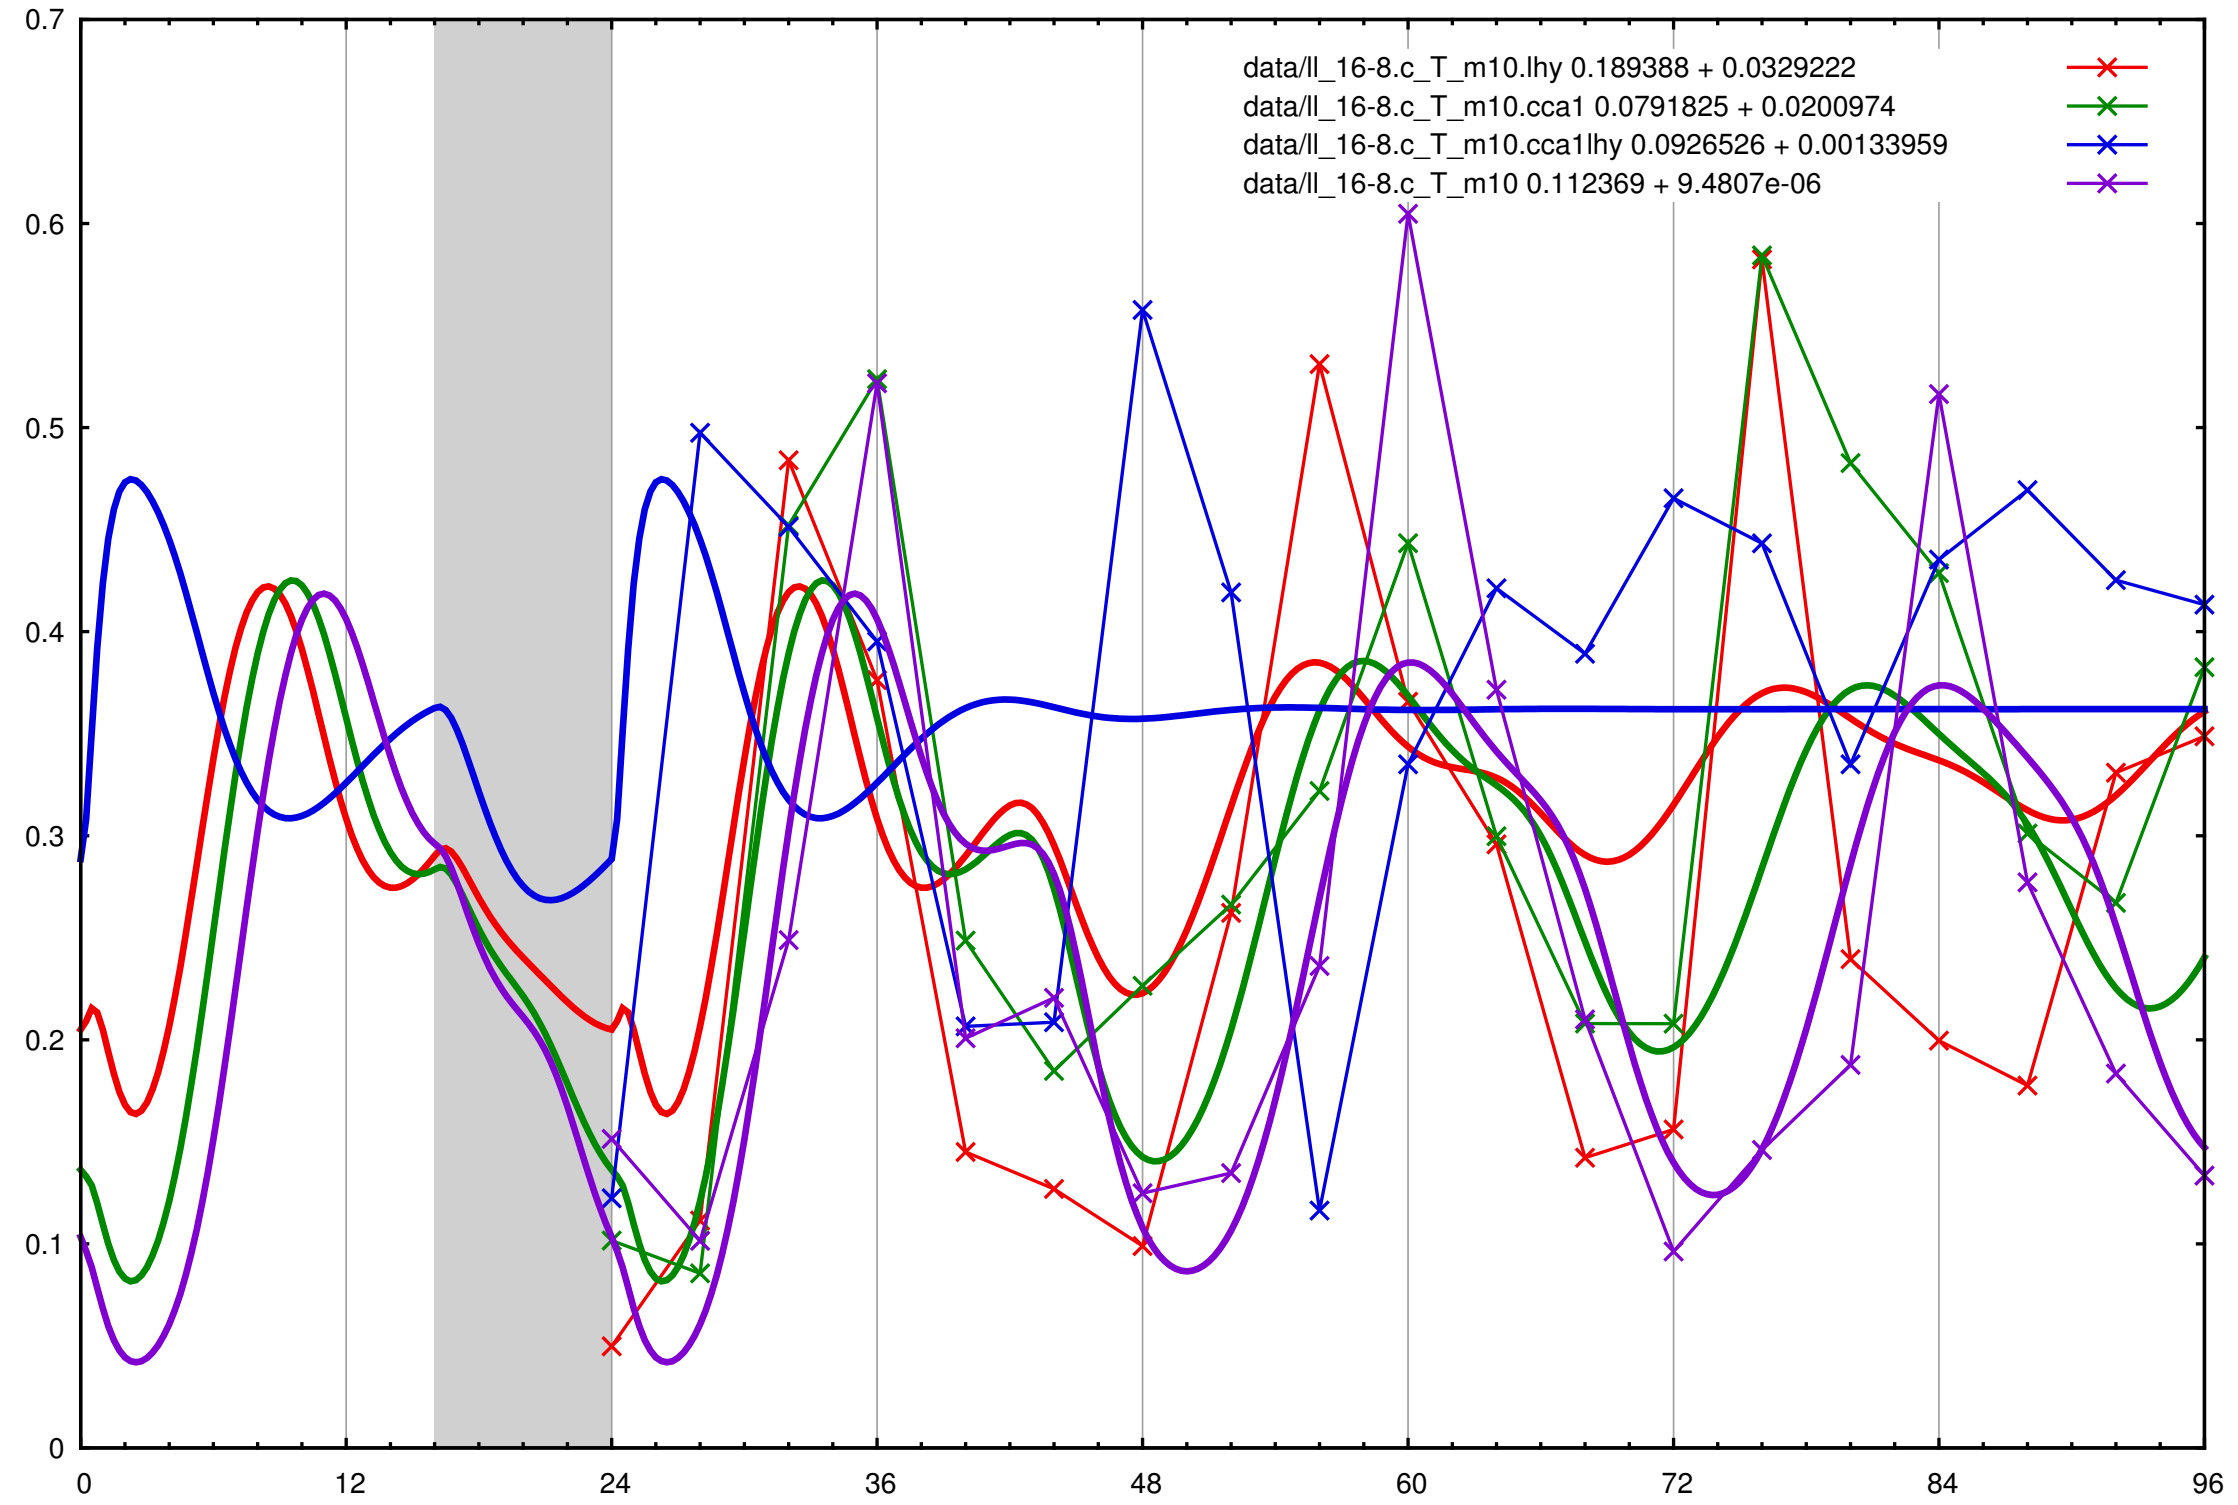

Scale group 252, scost 0.182788

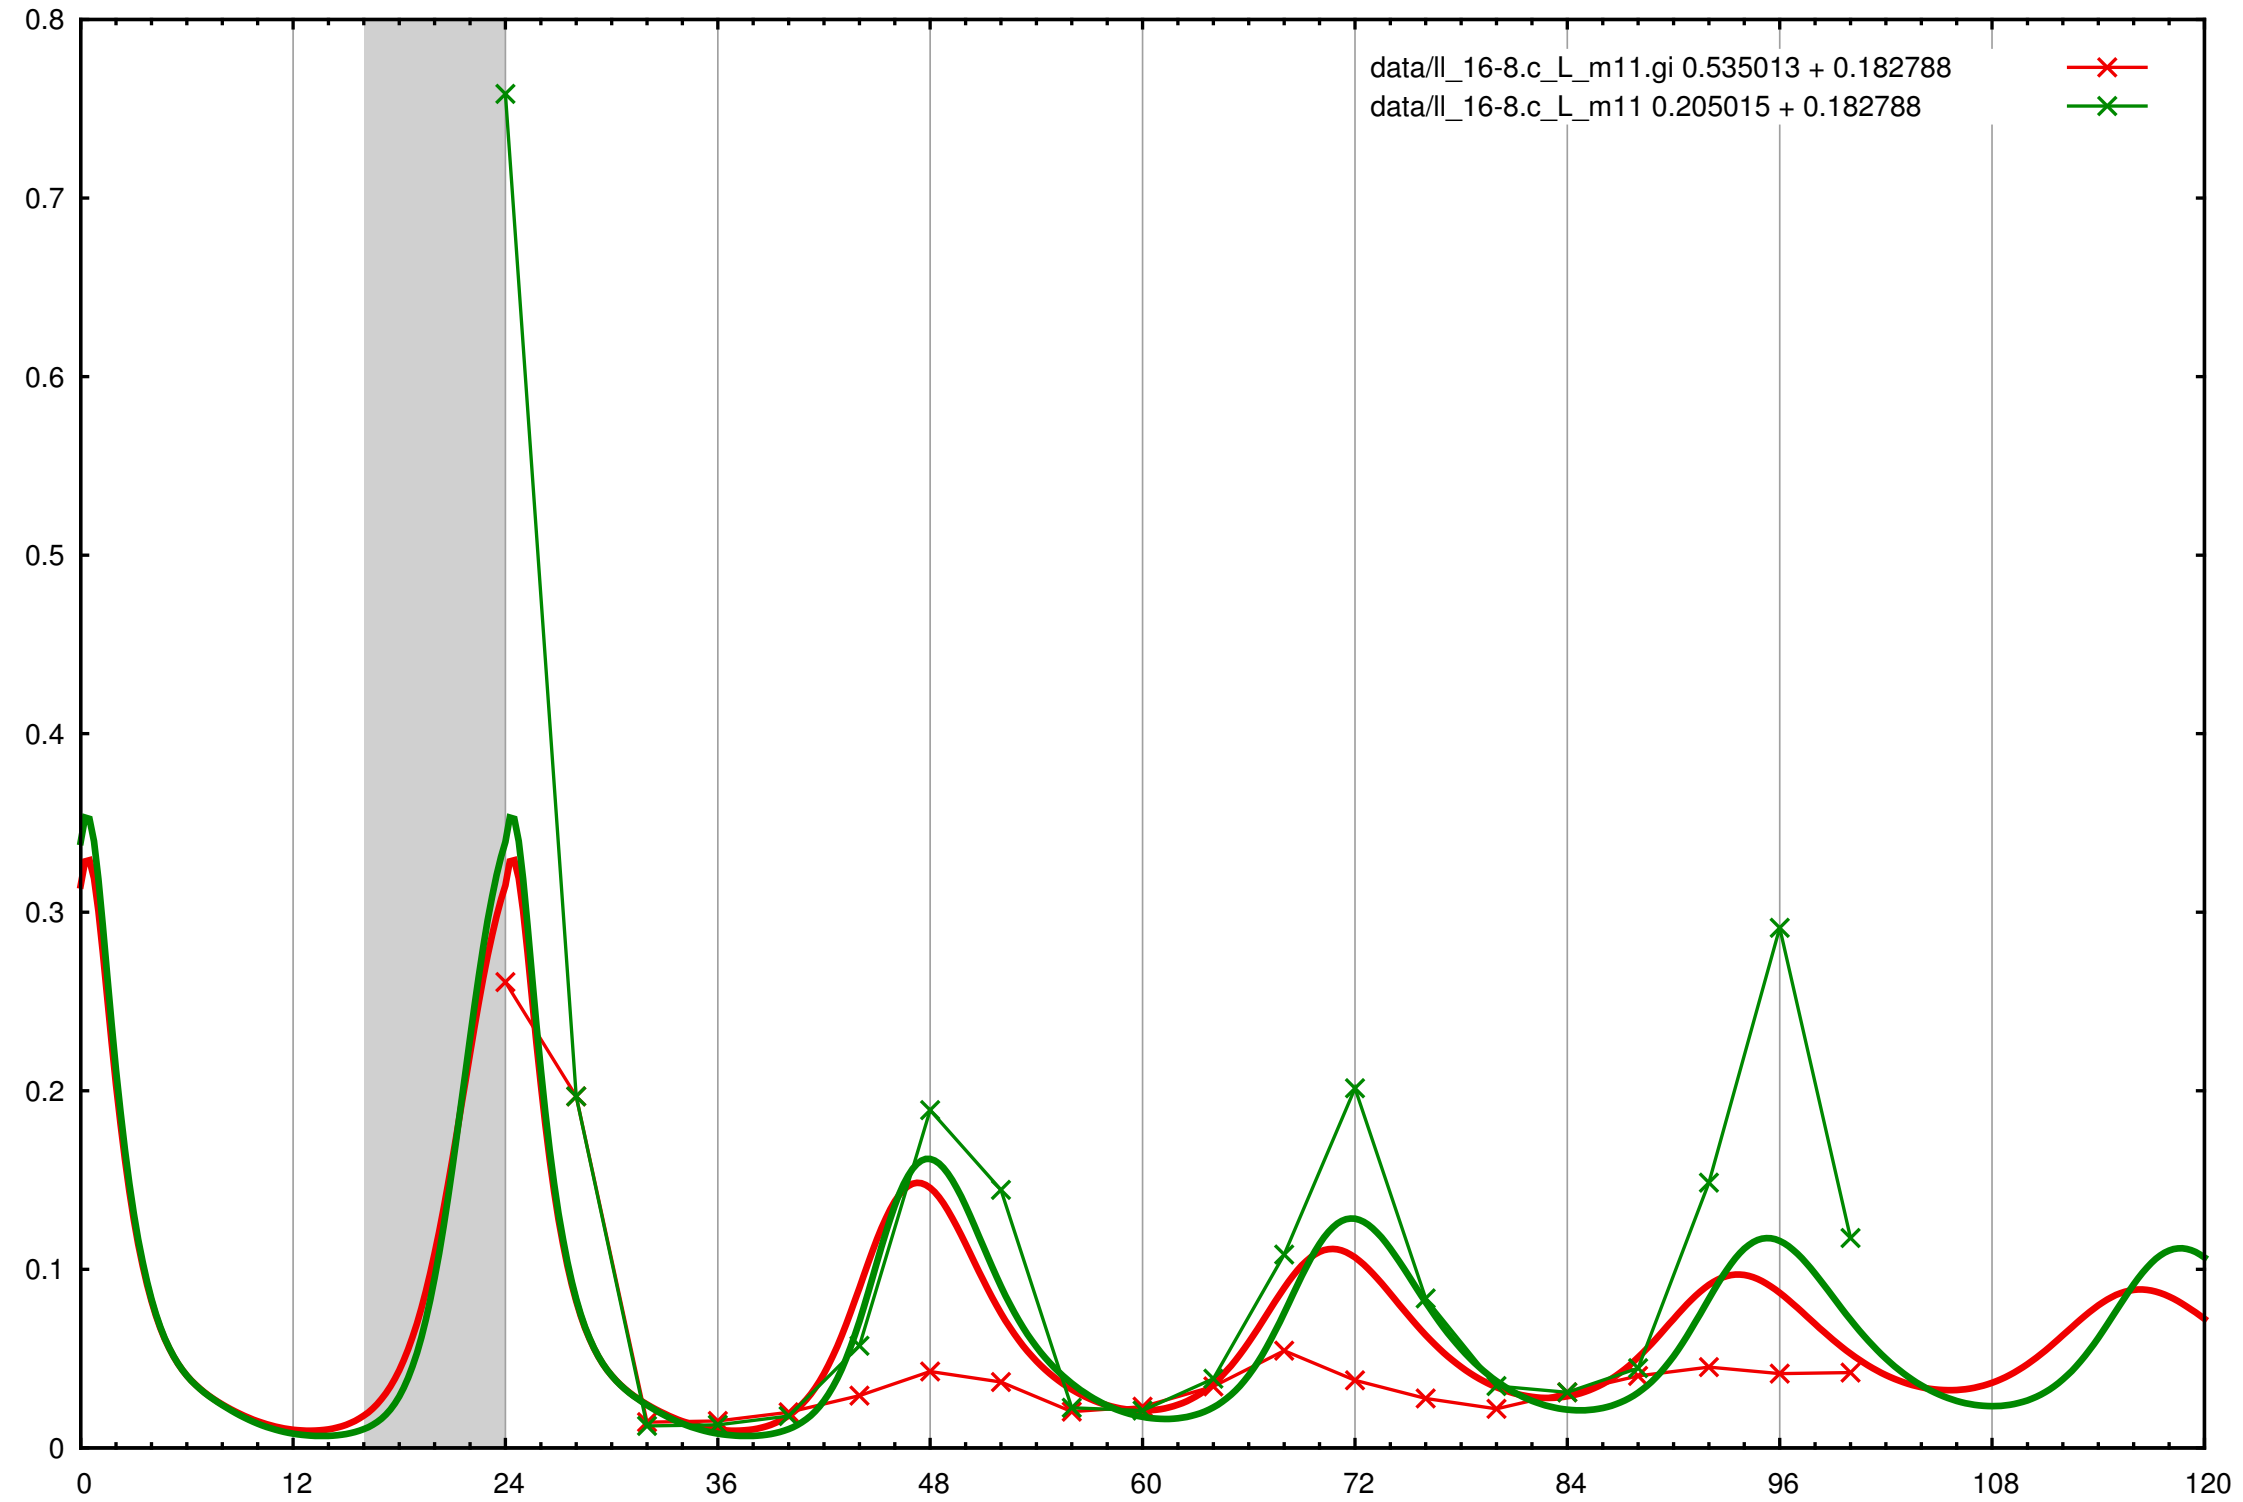

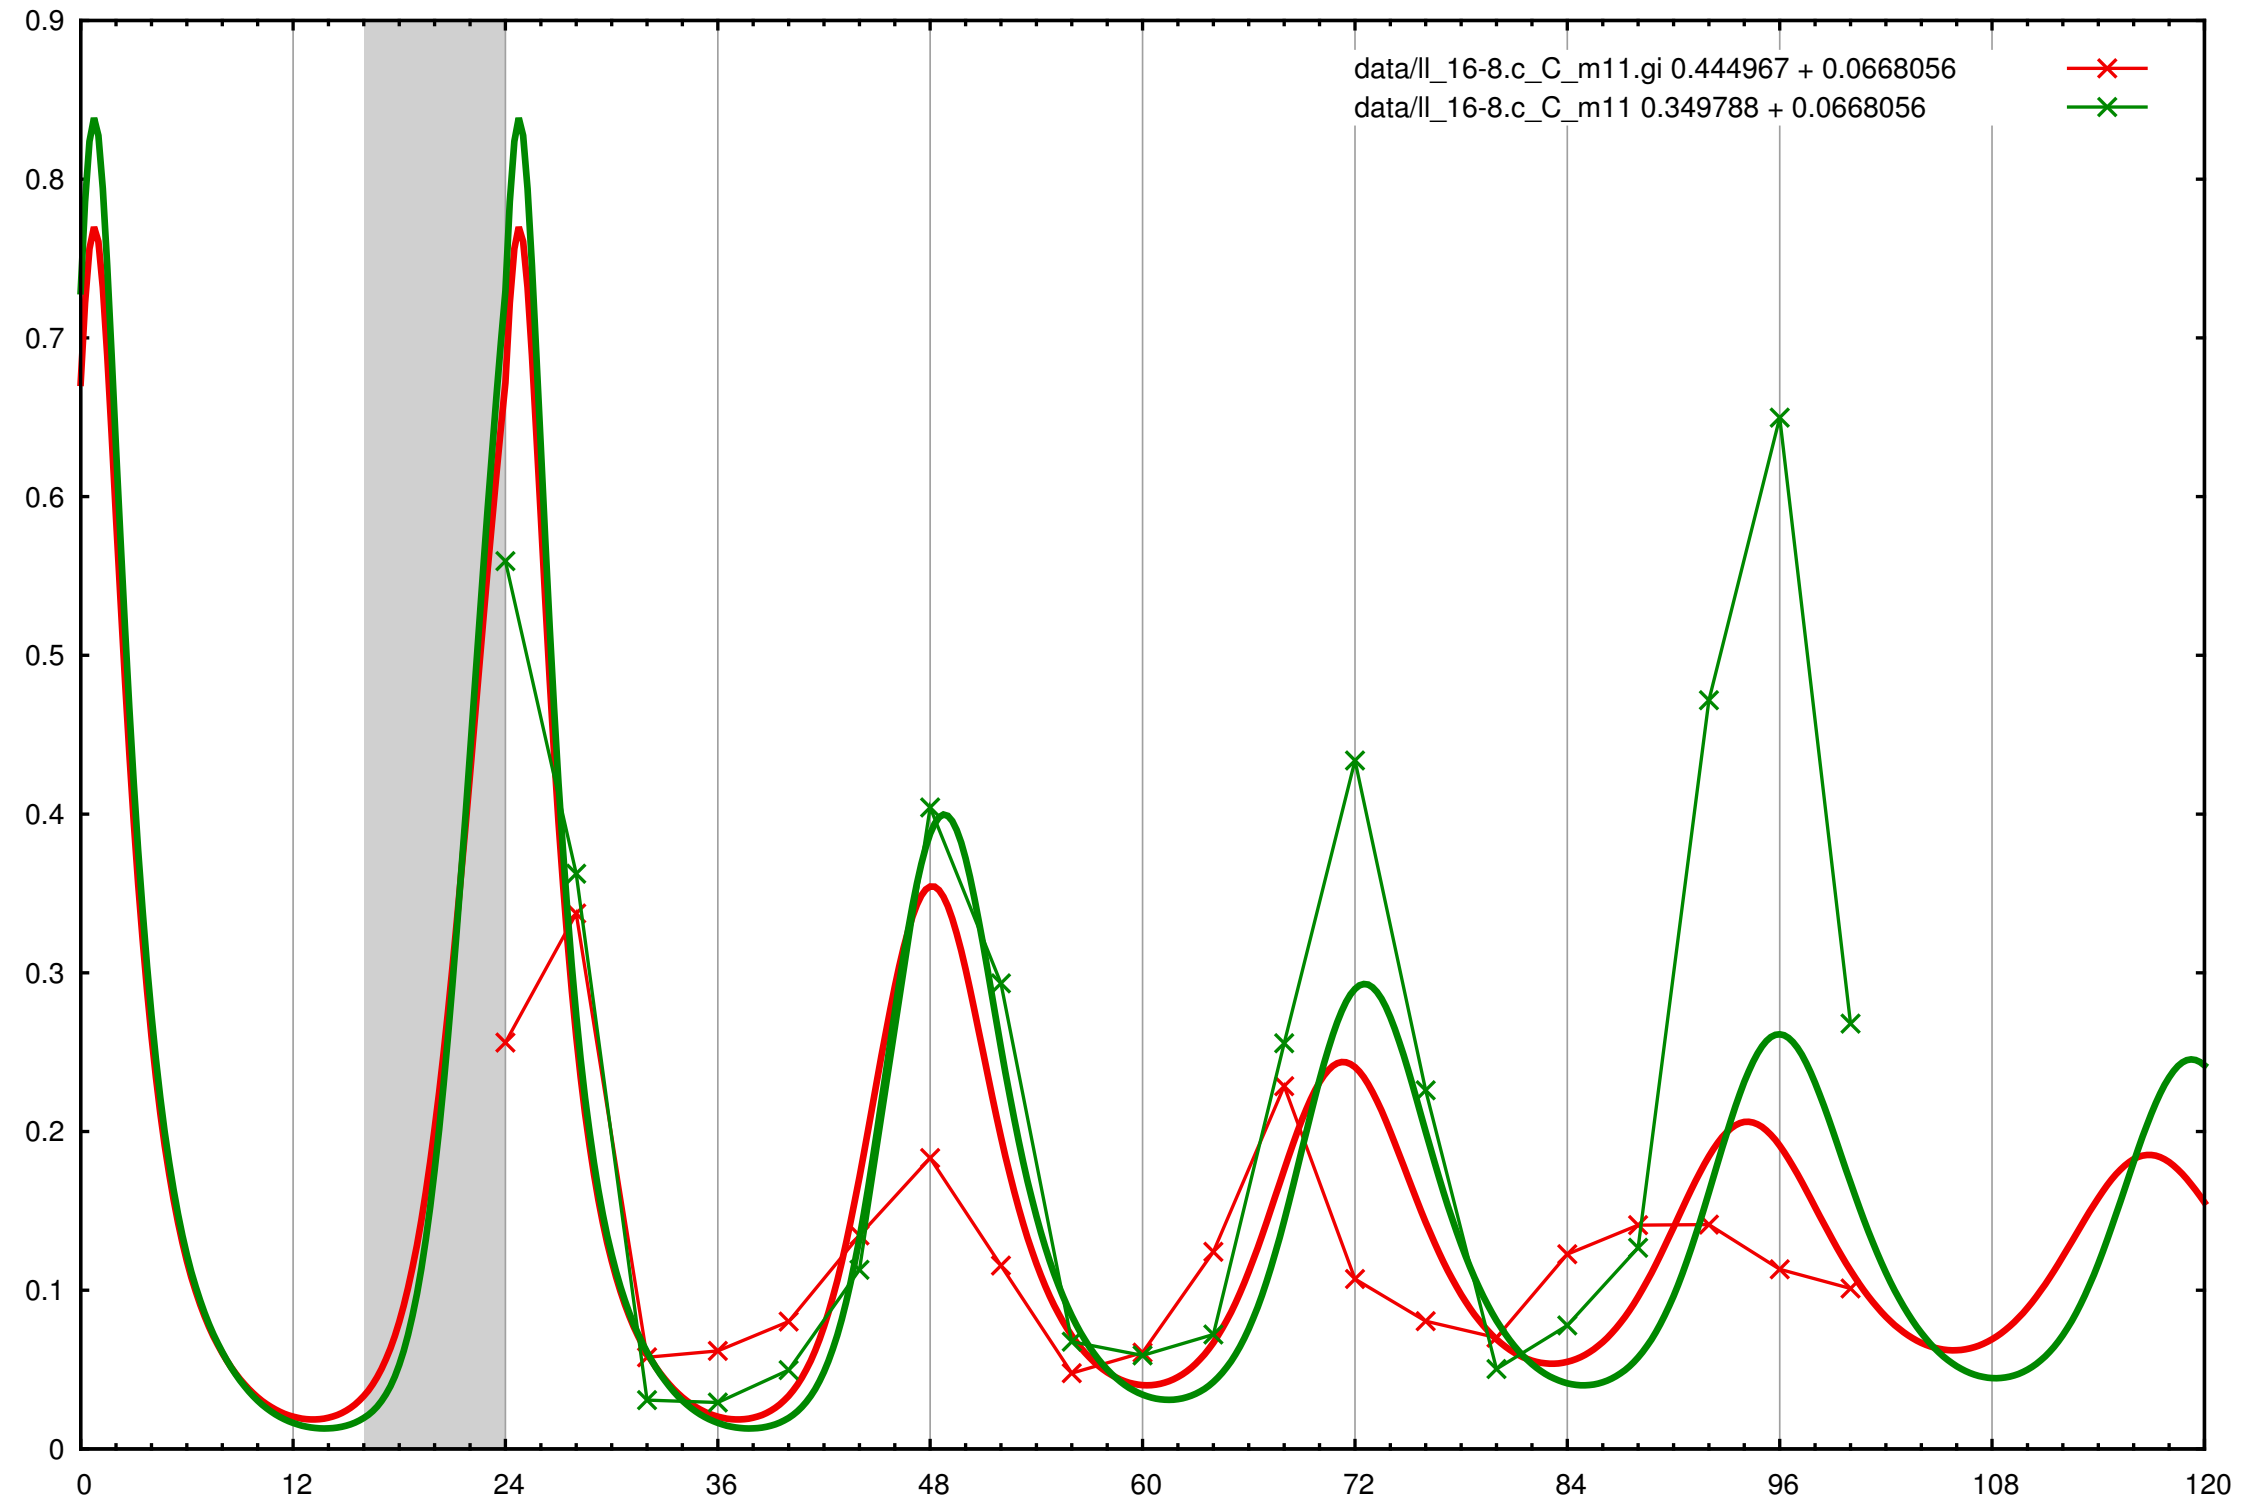

Scale group 254, scost 0.00870055

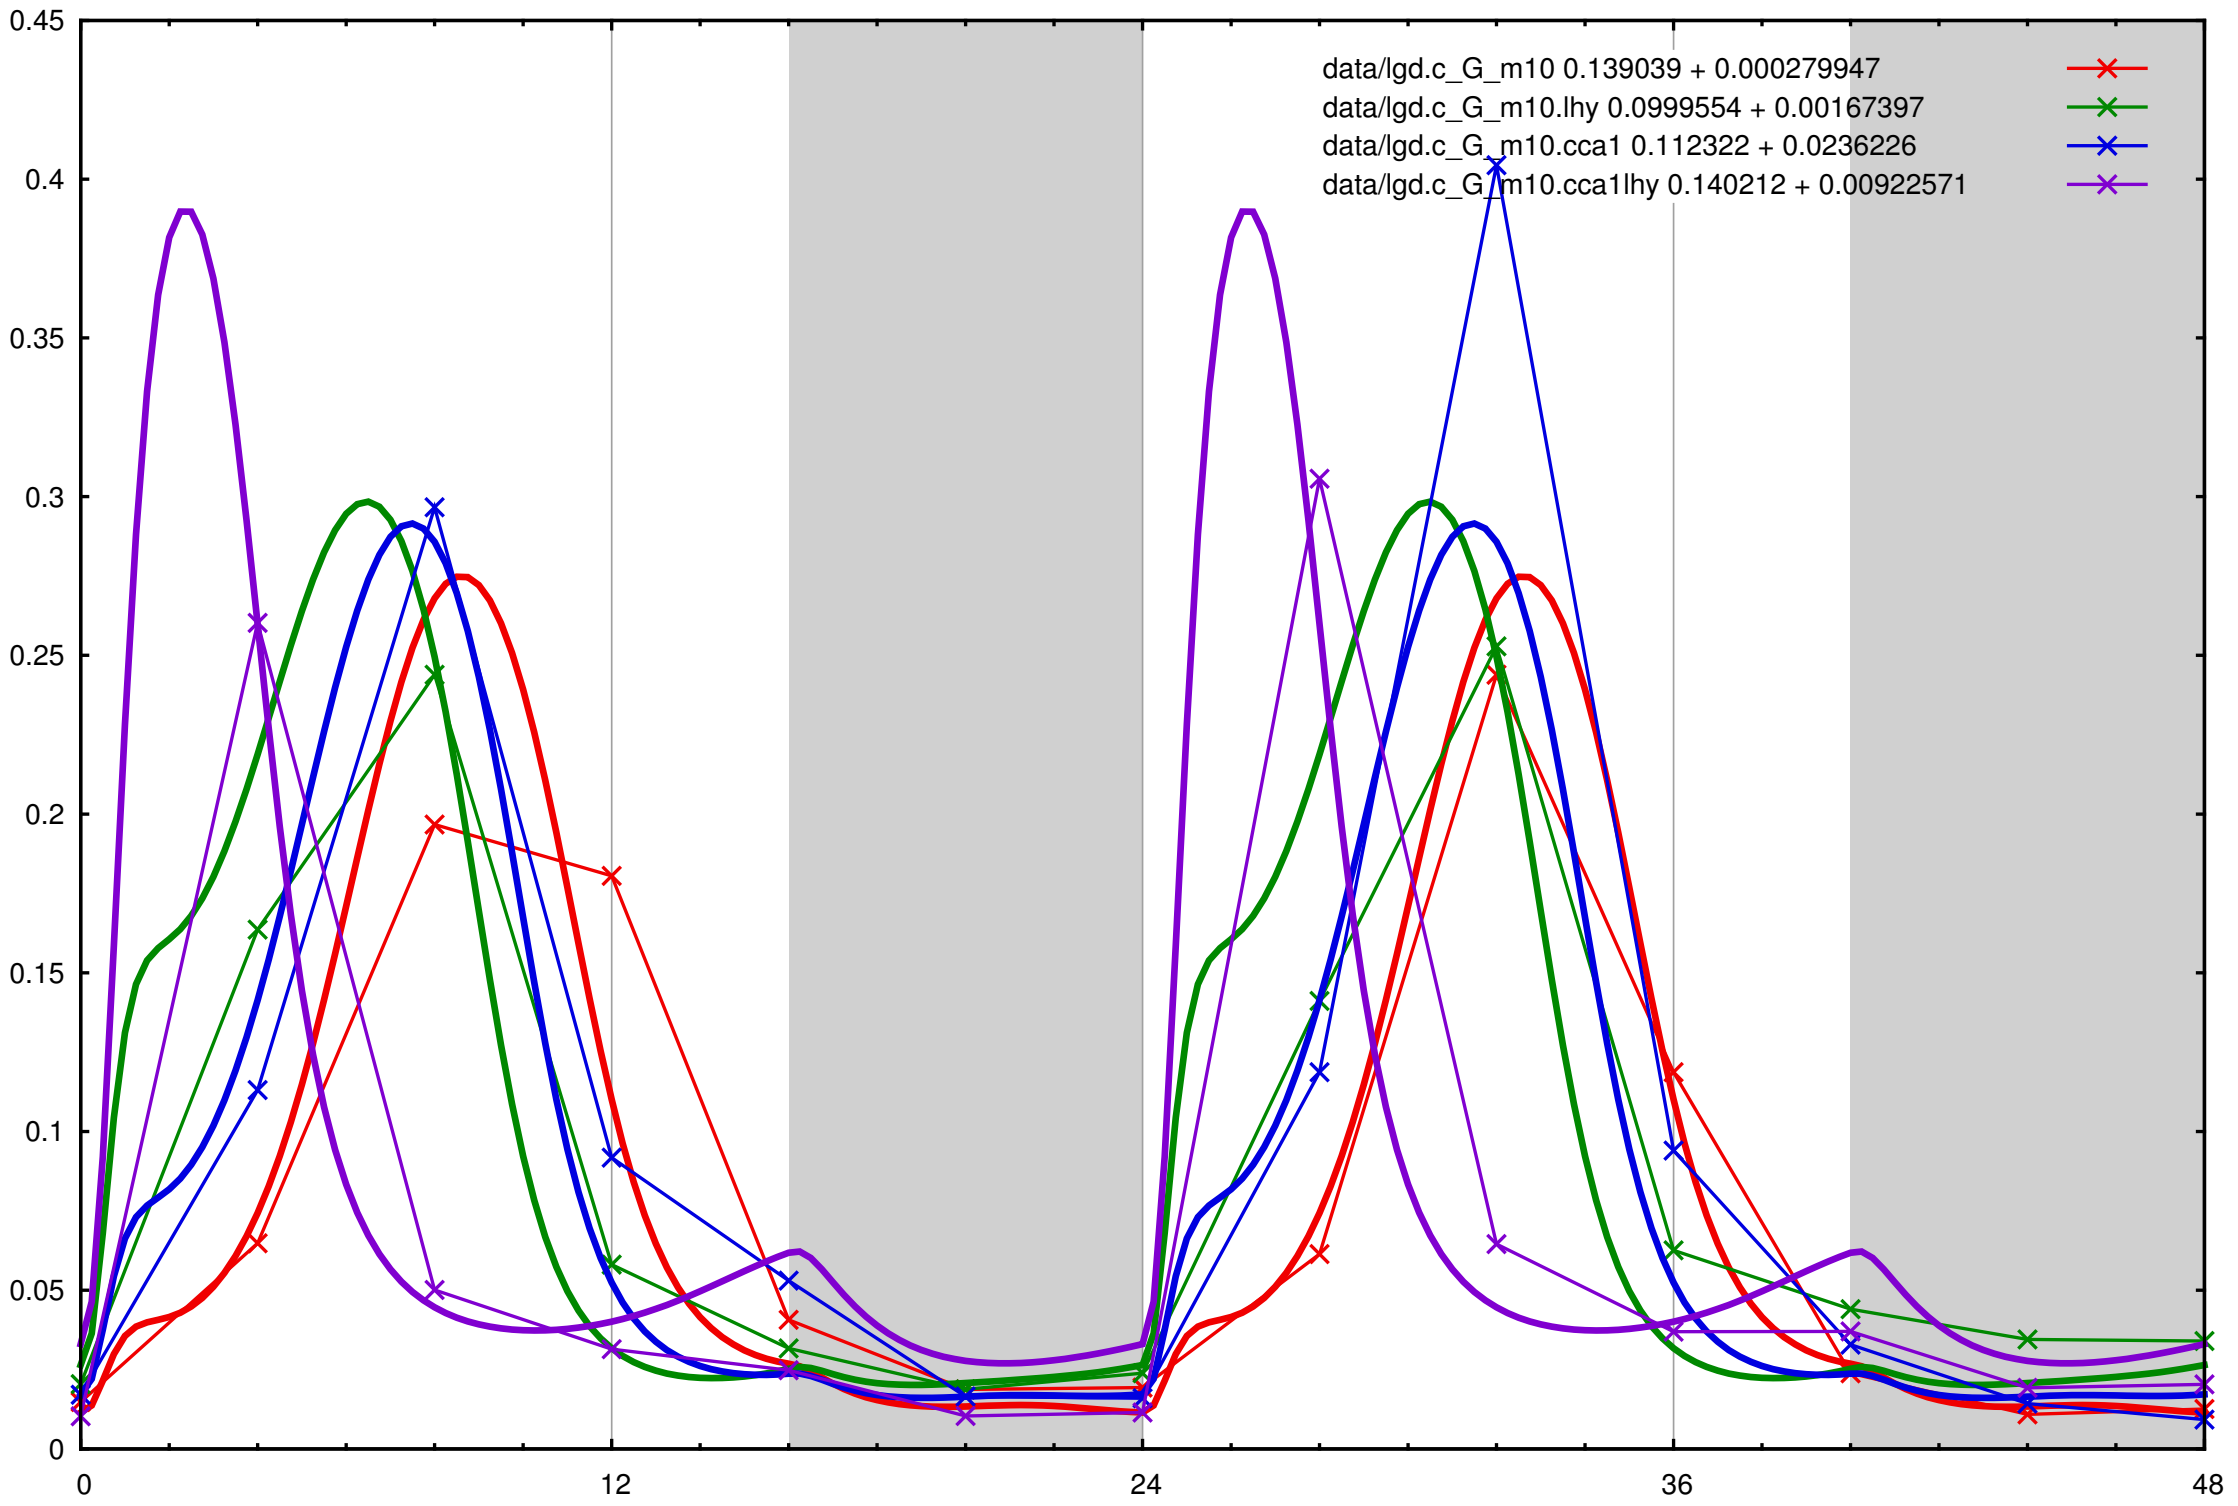

Scale group 255, scost 0.0105953

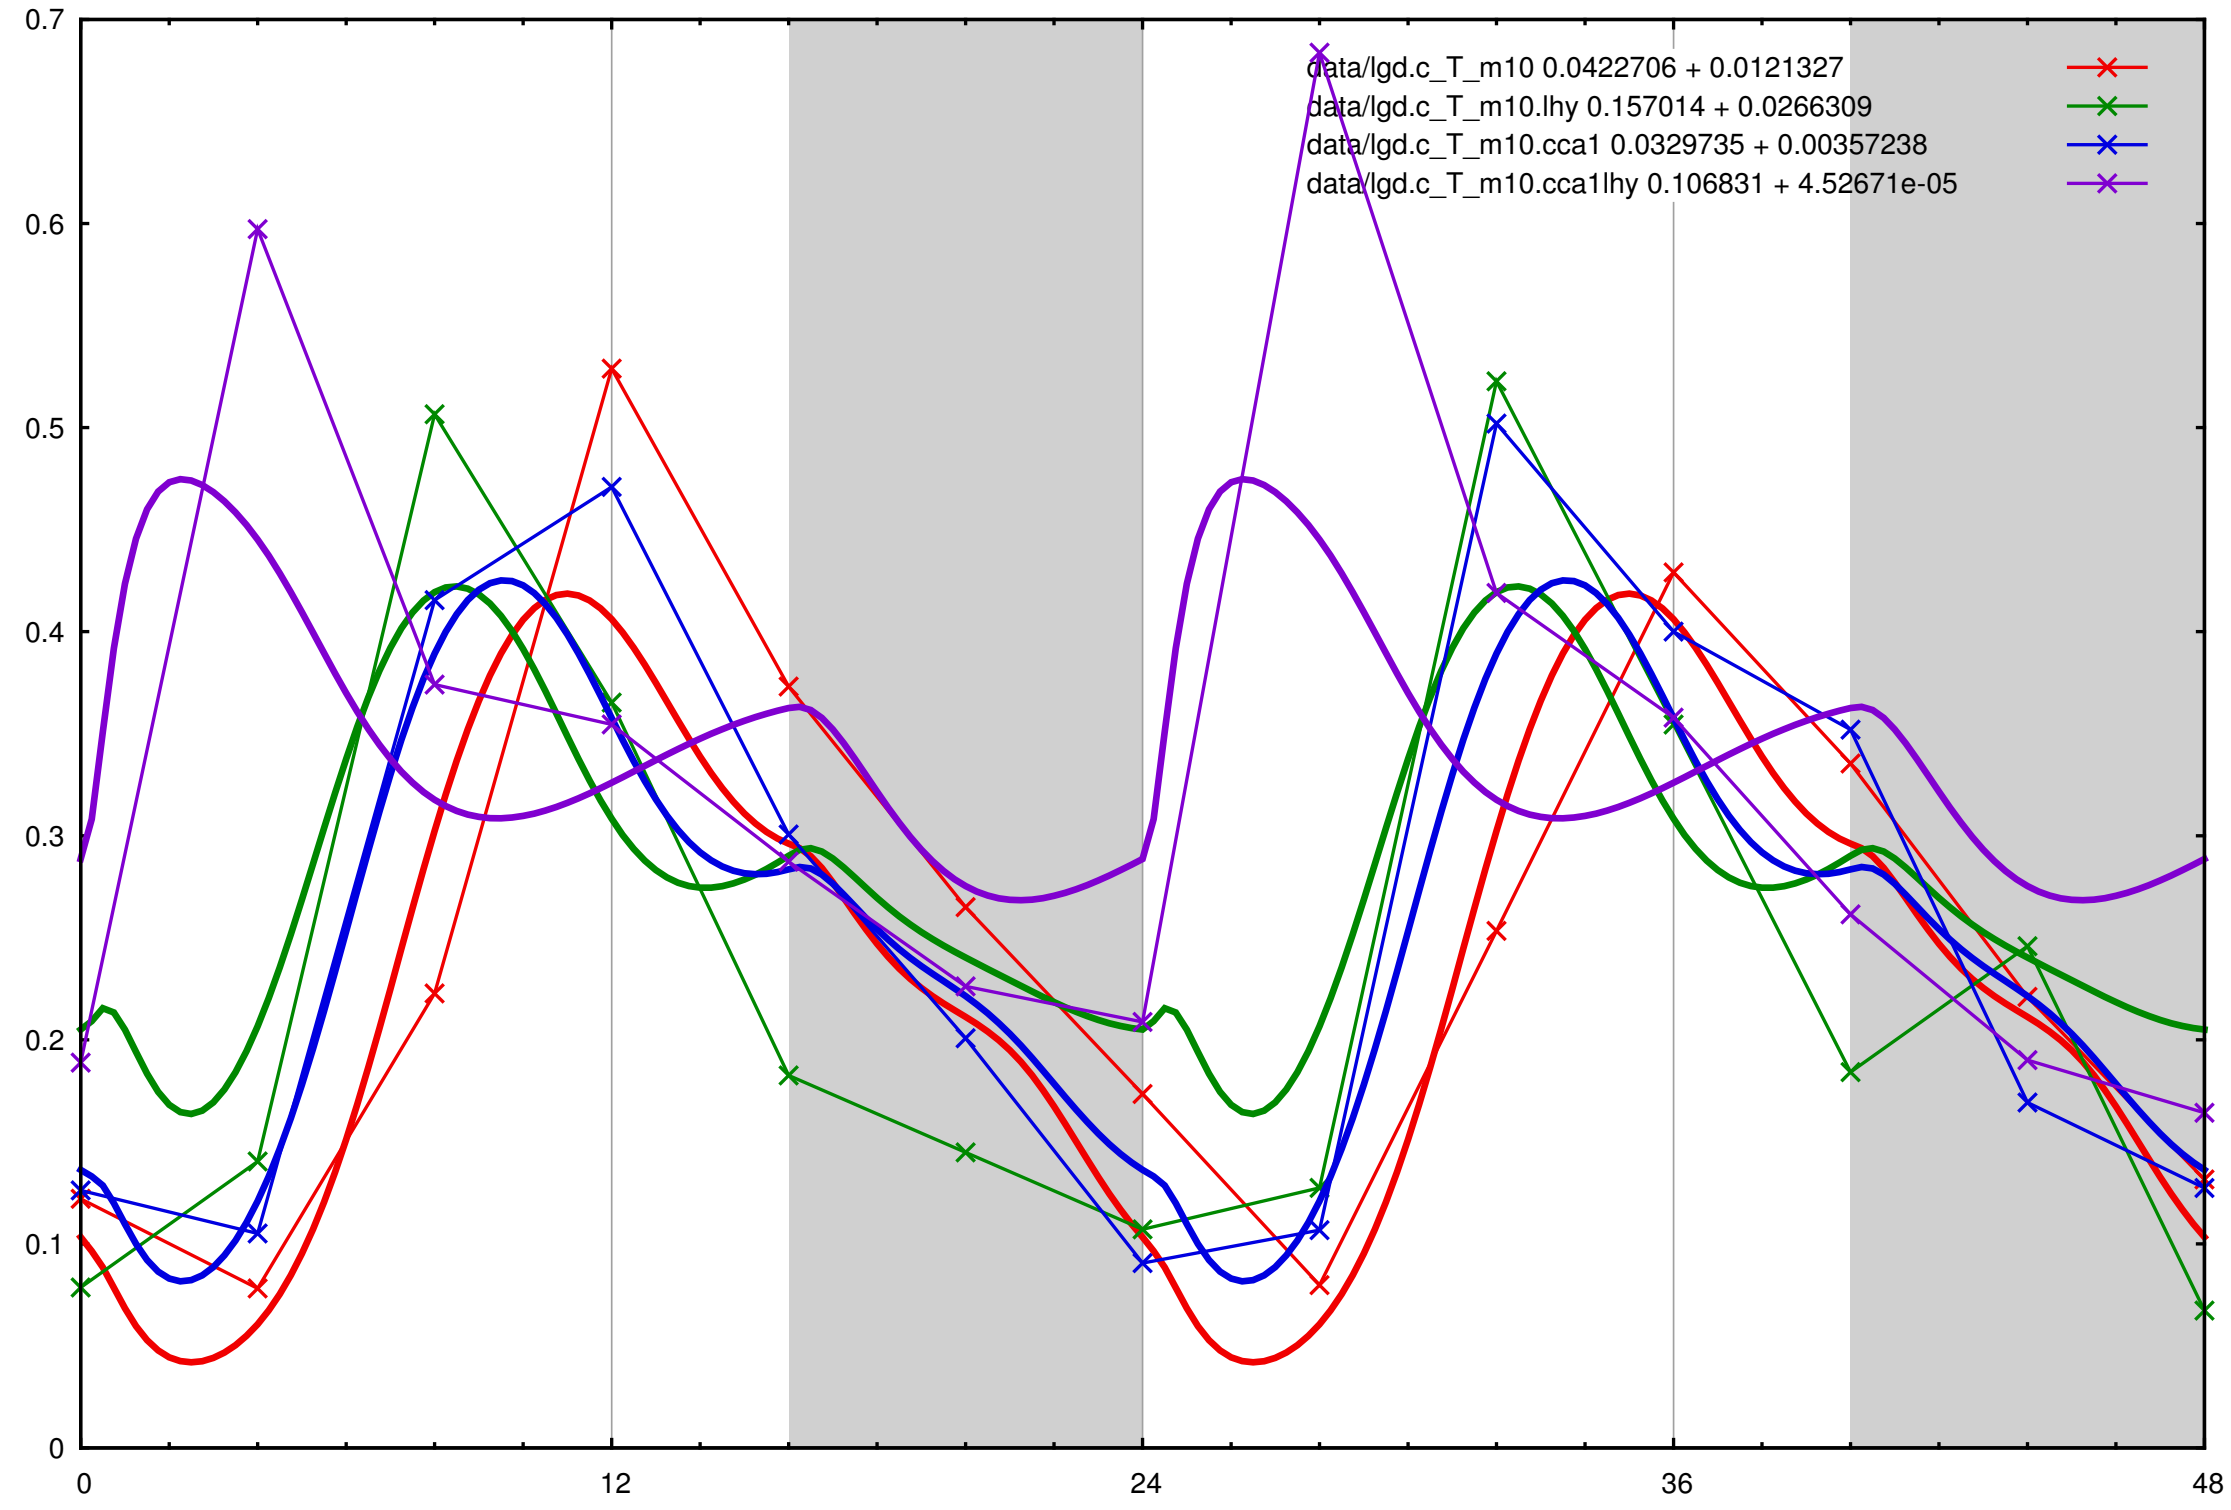

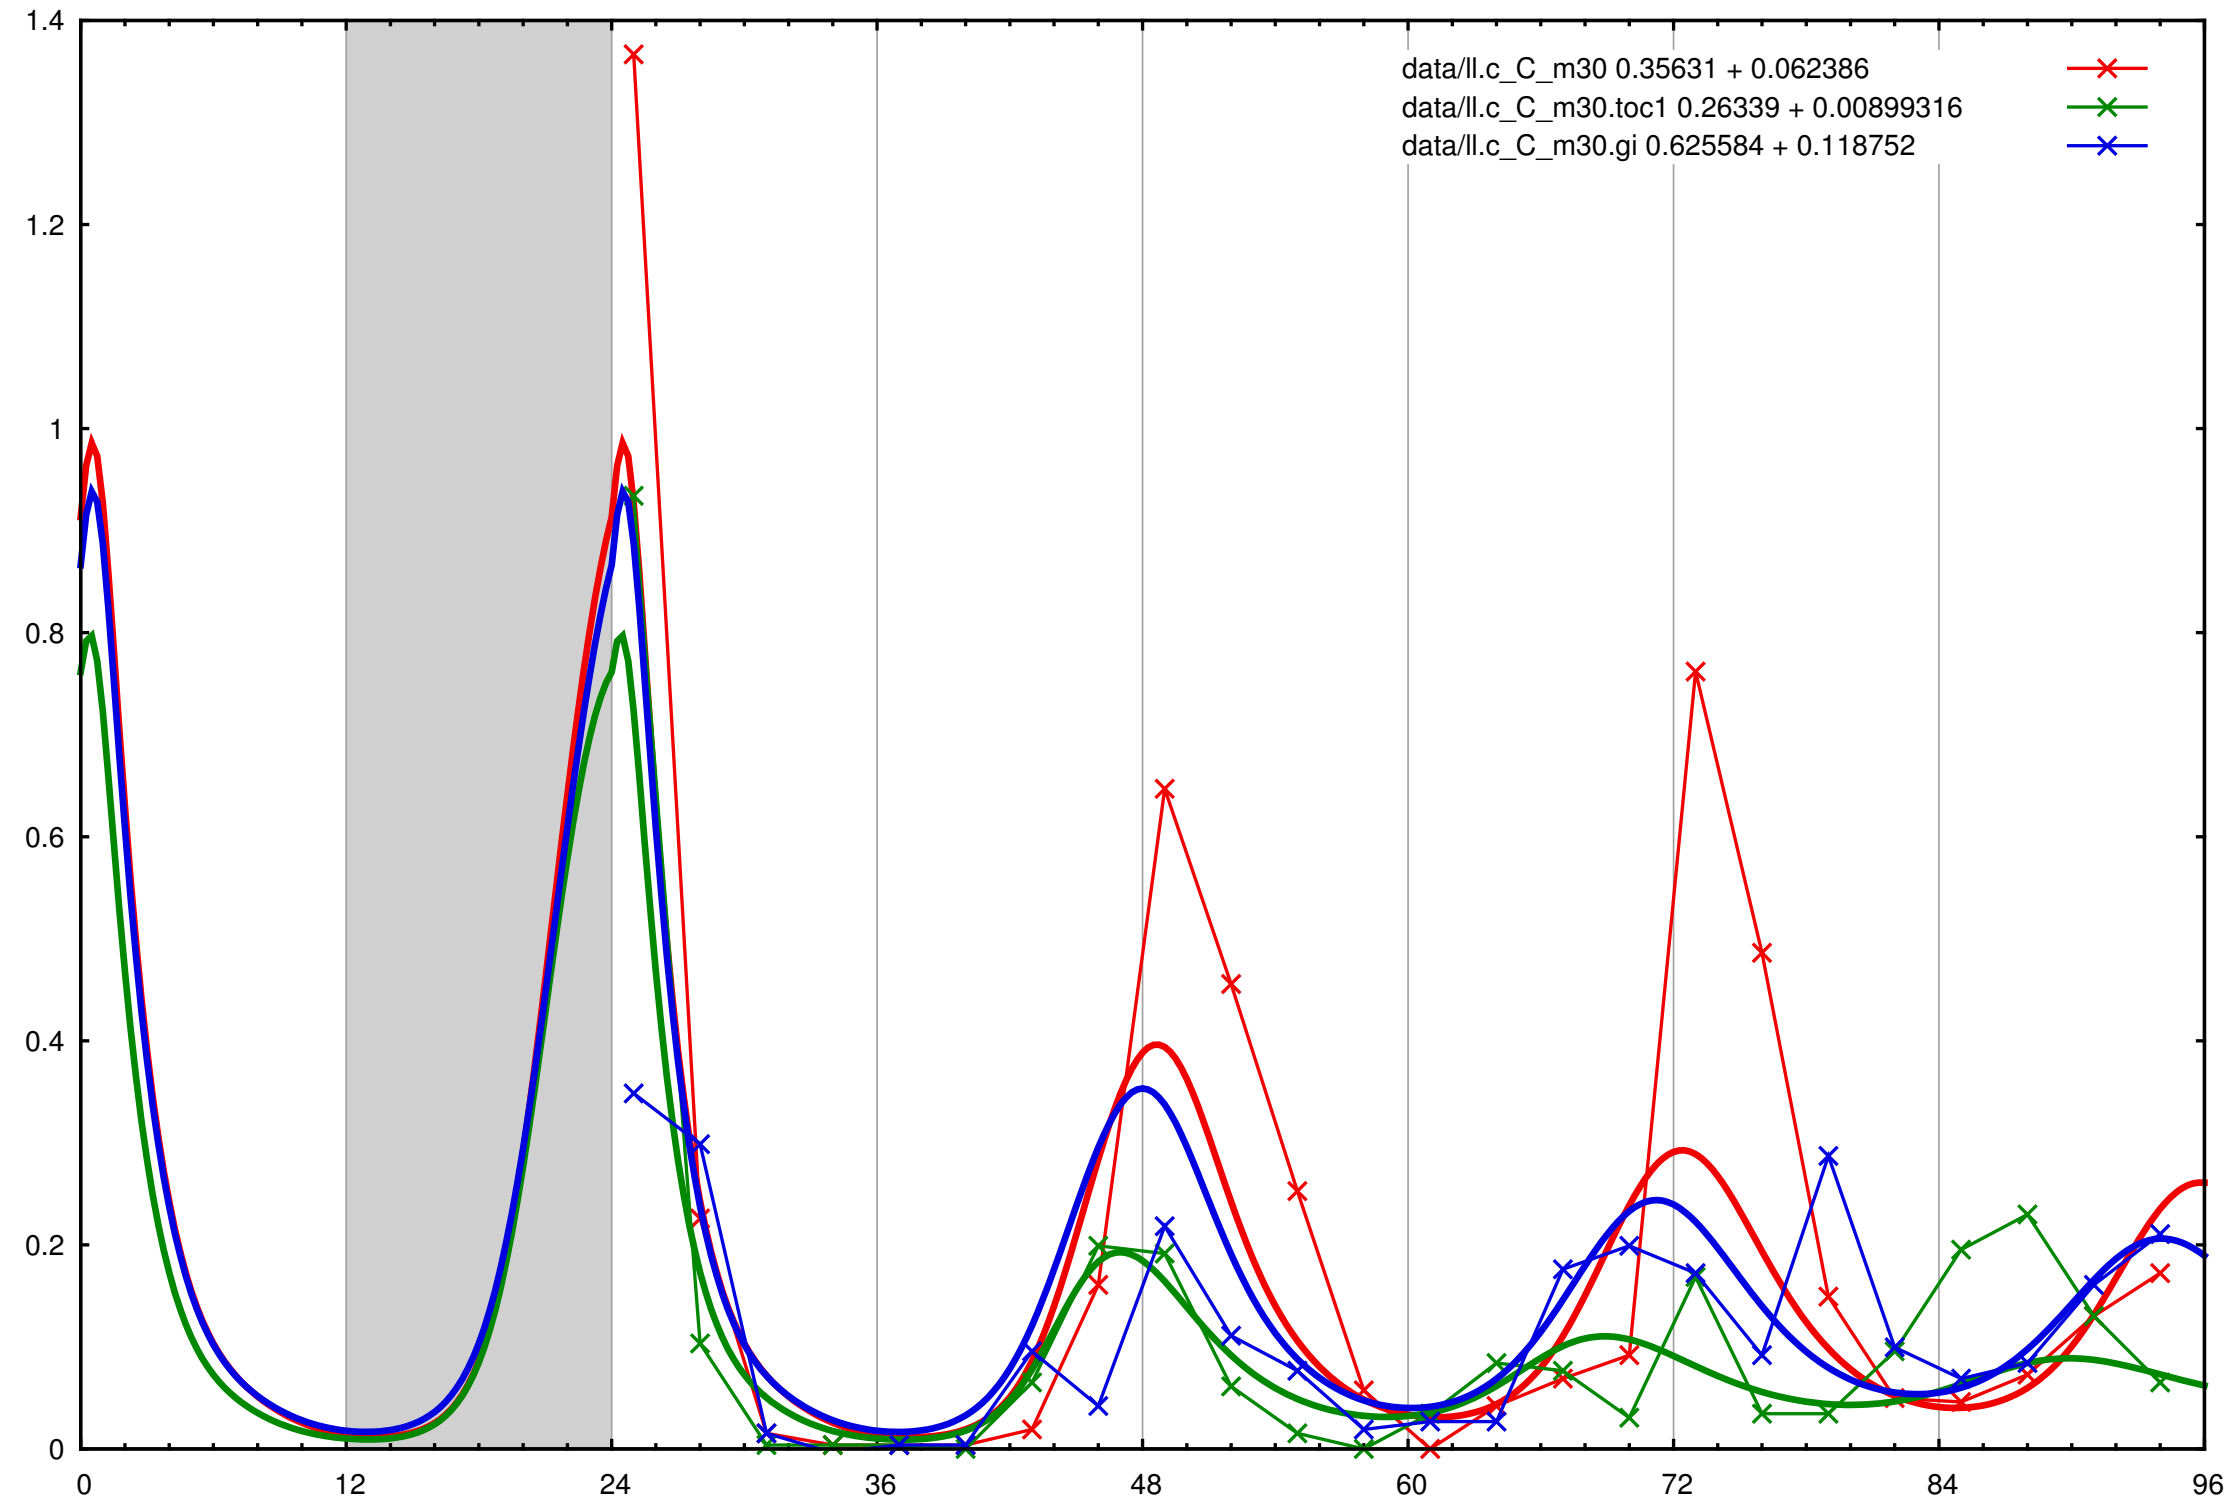



Scale group 257, scost 0.123621

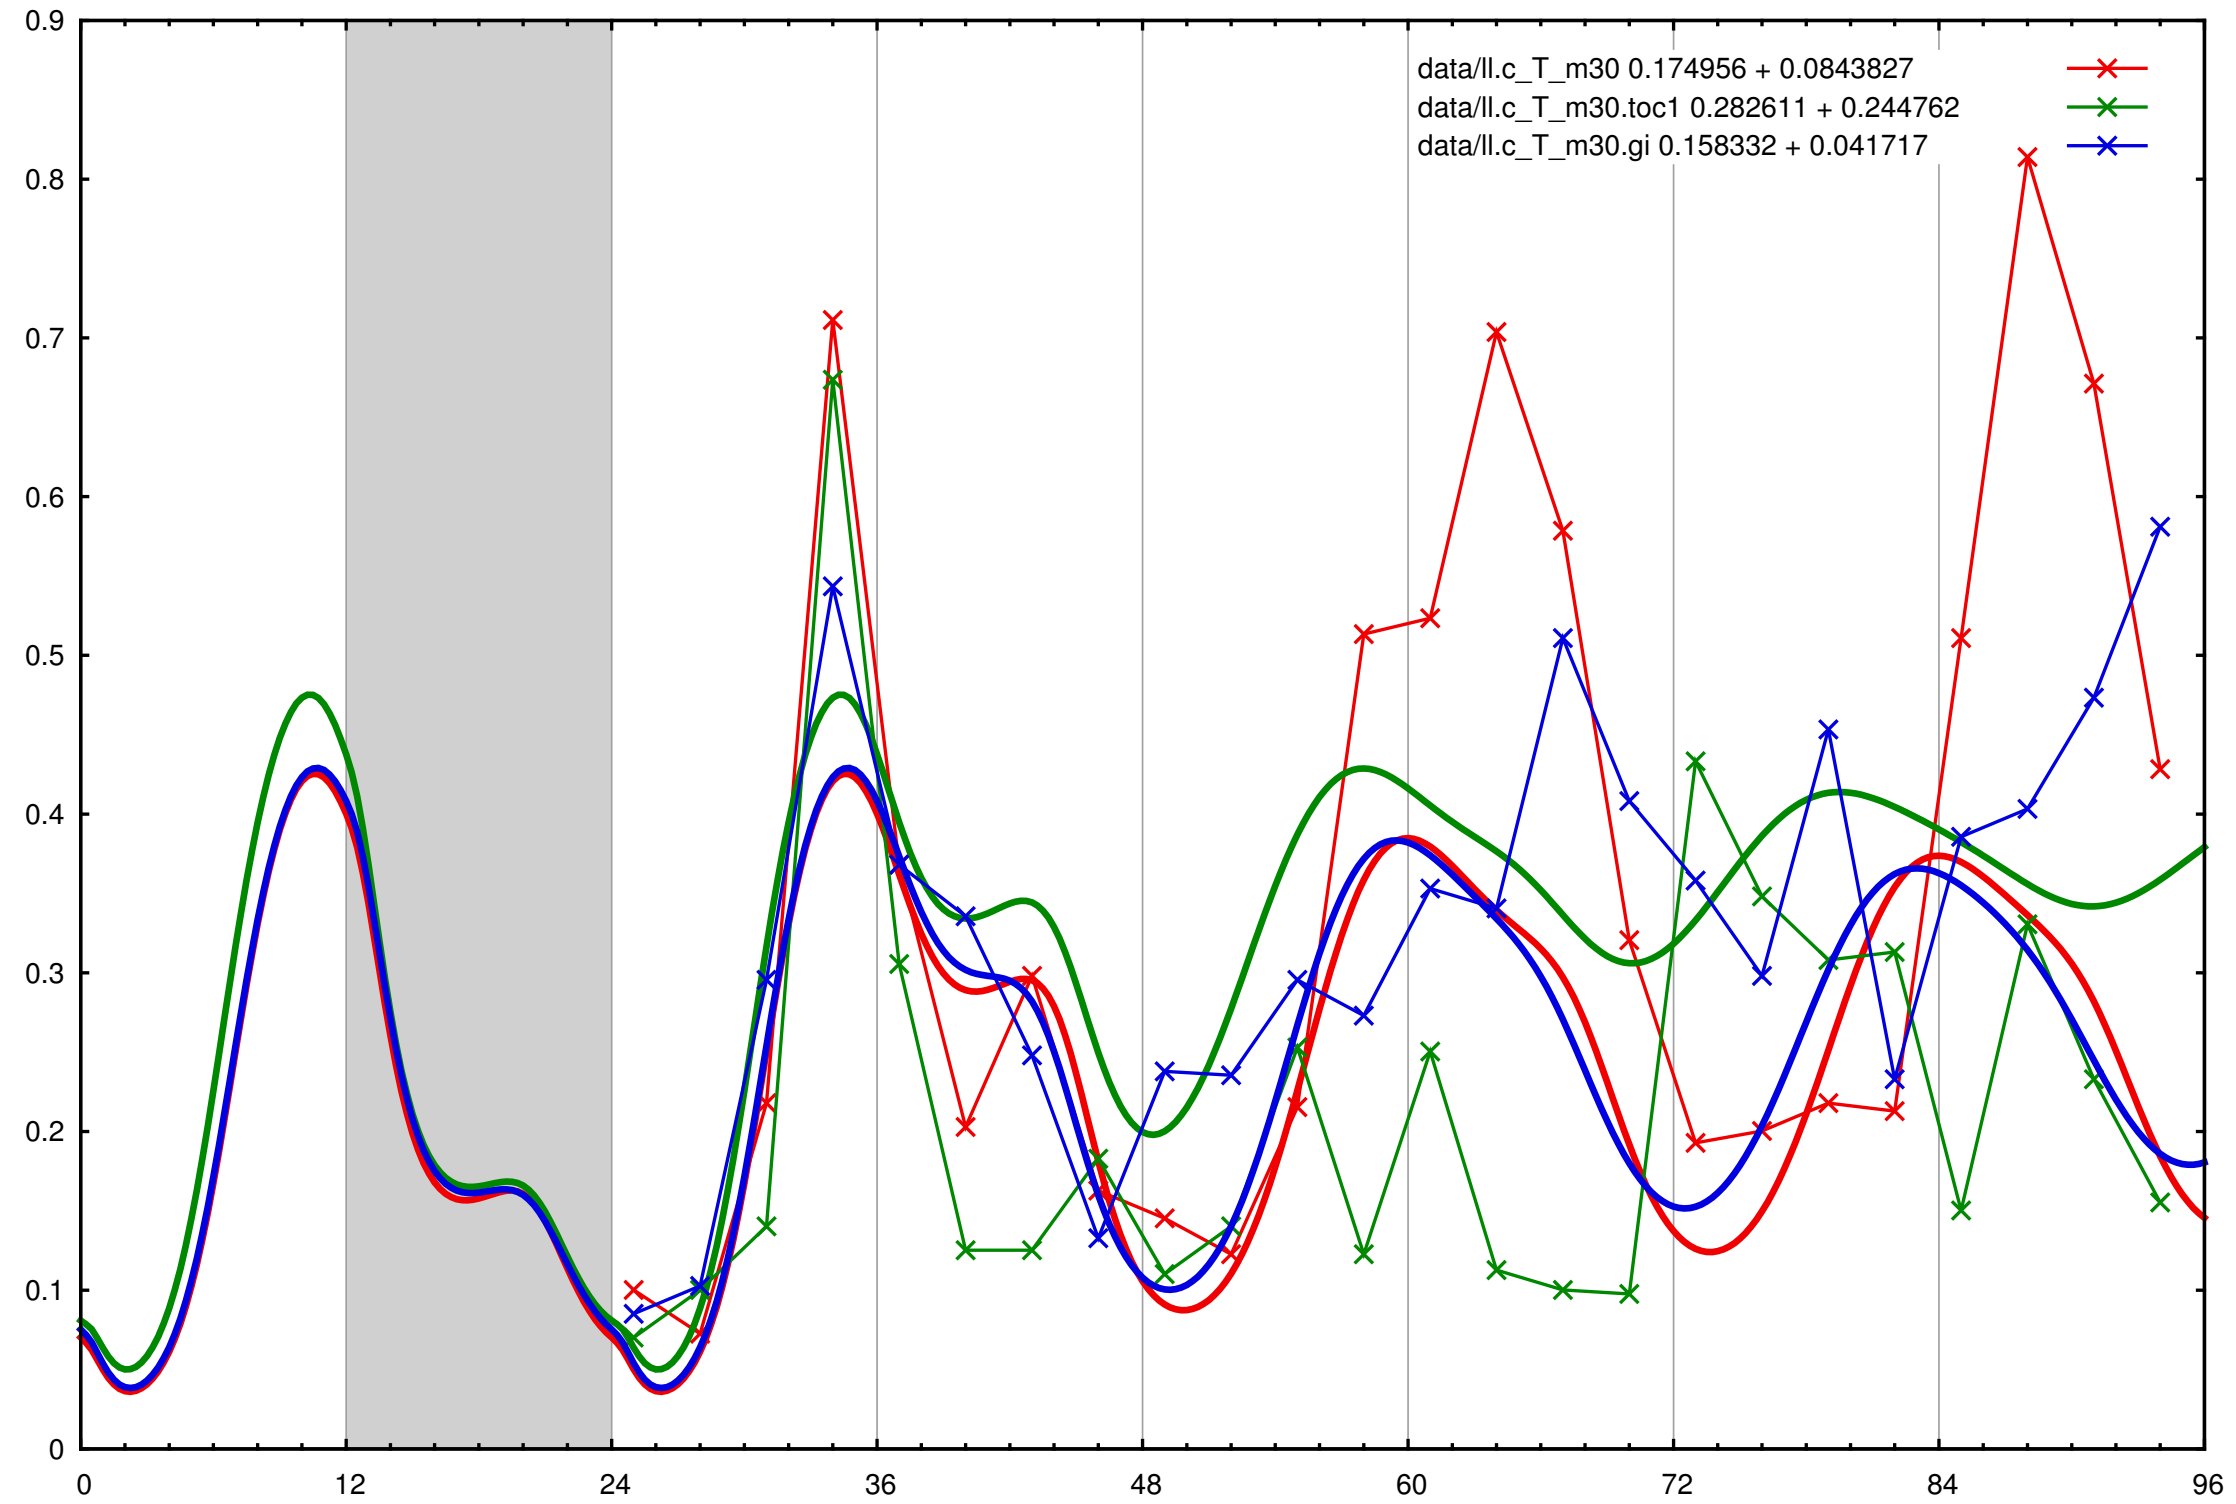

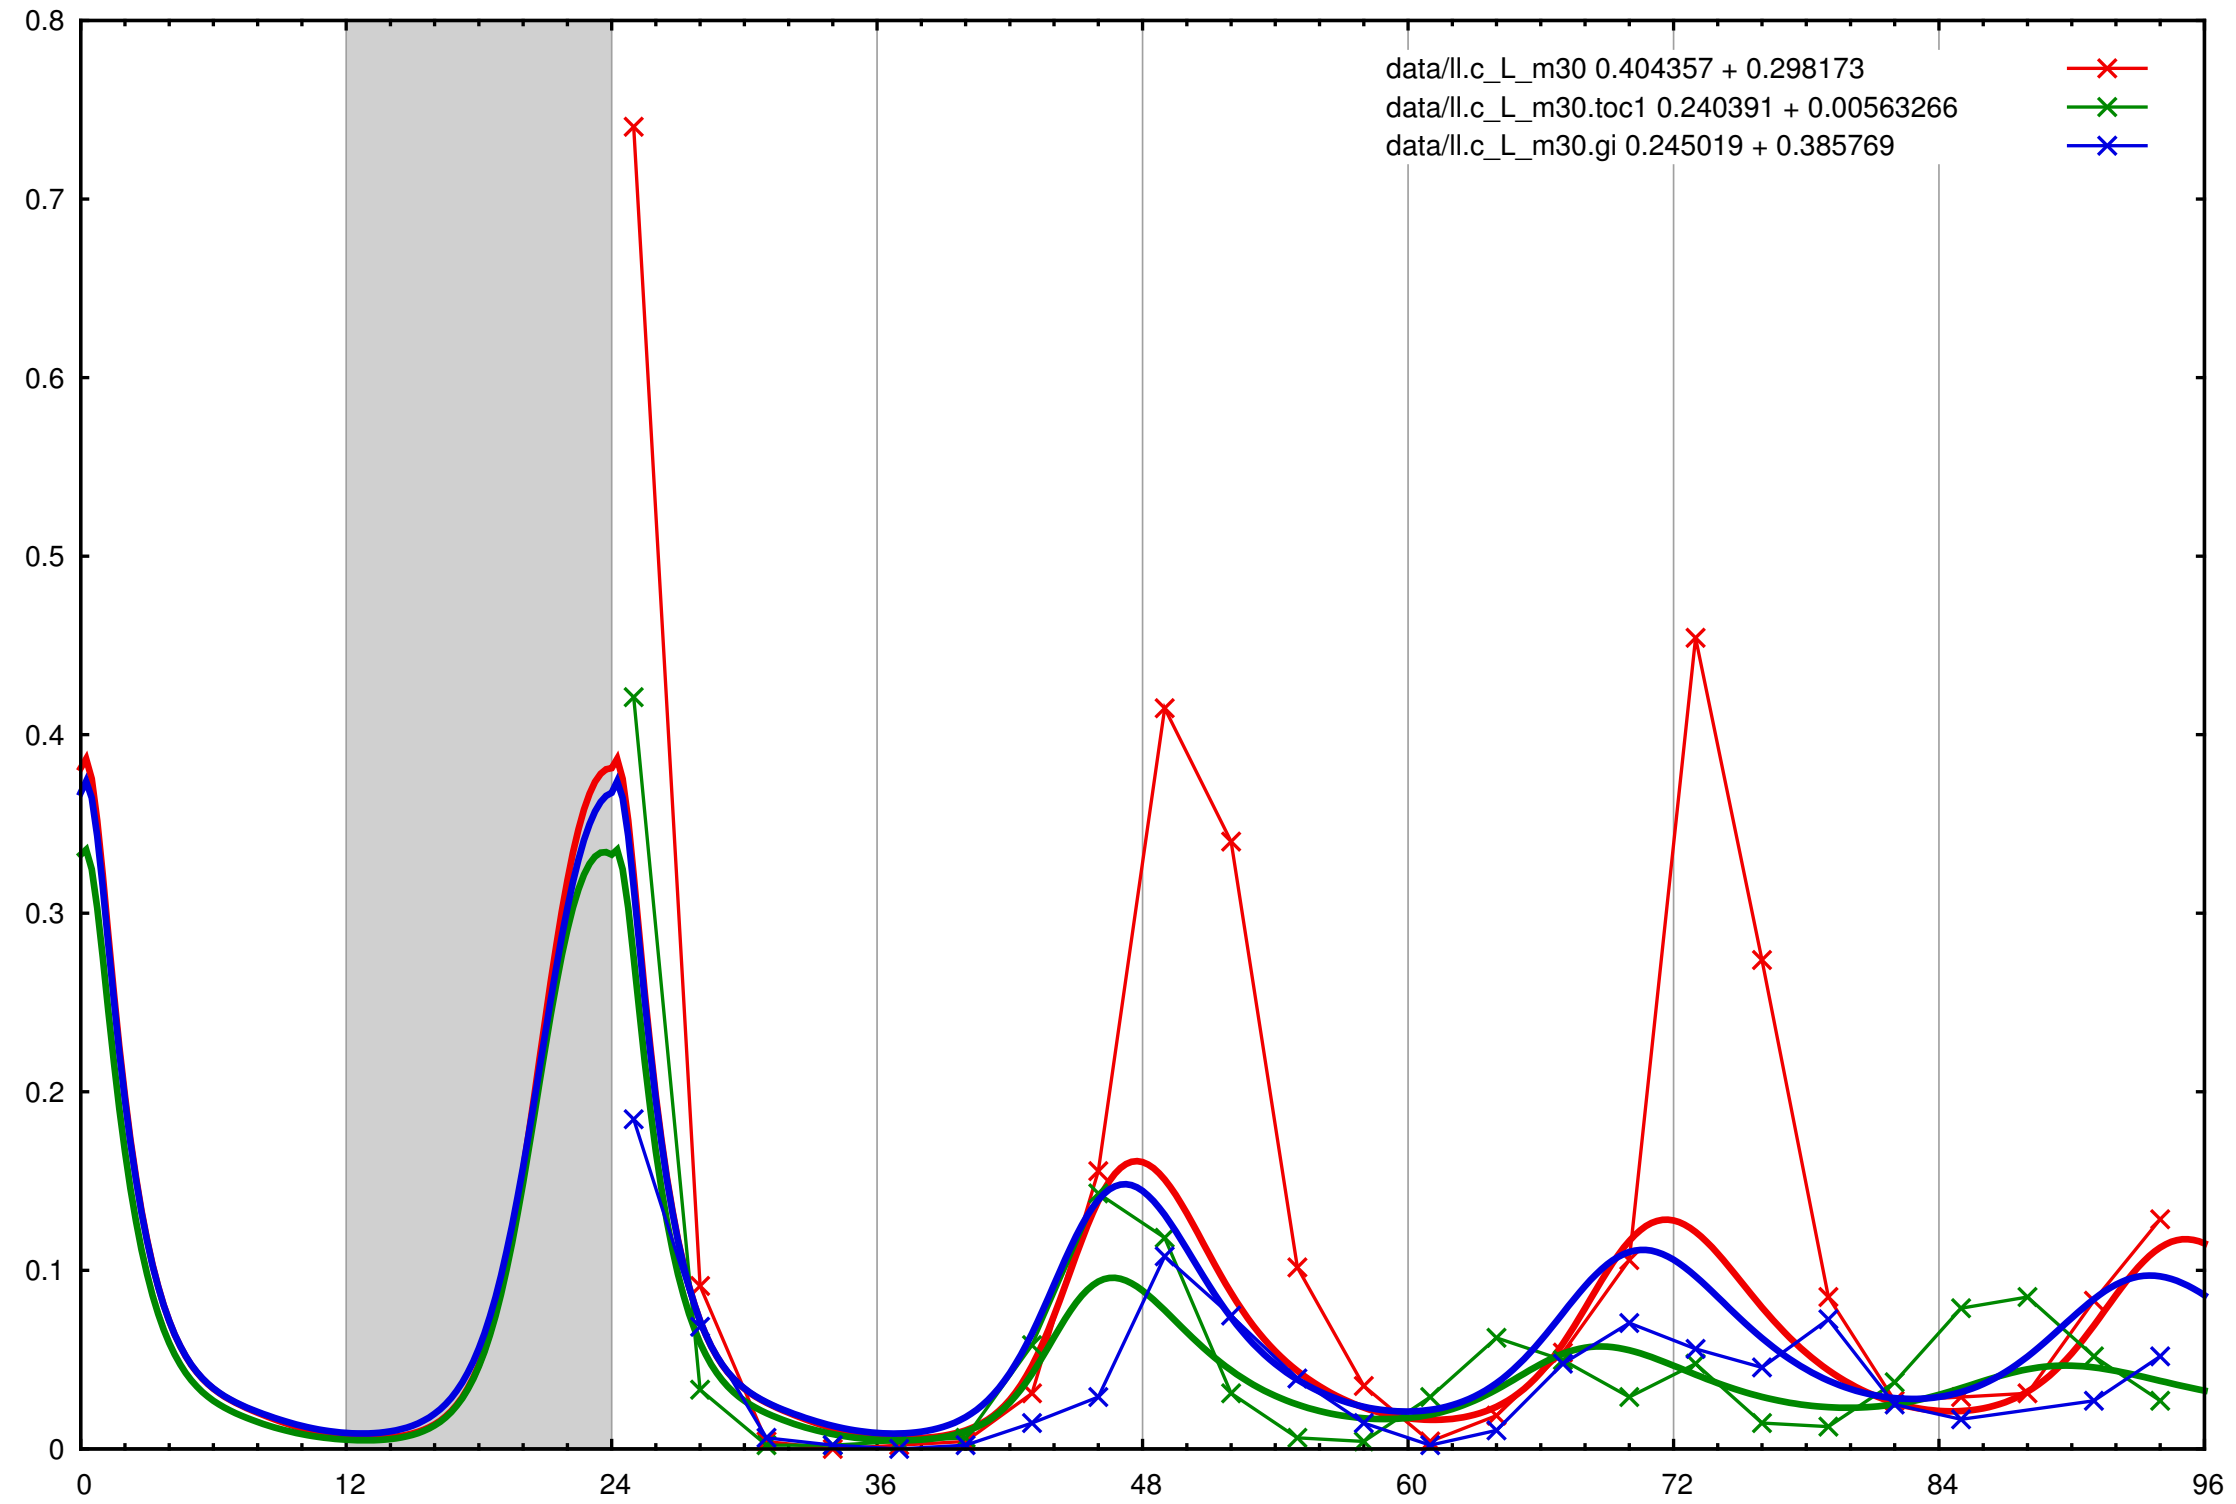

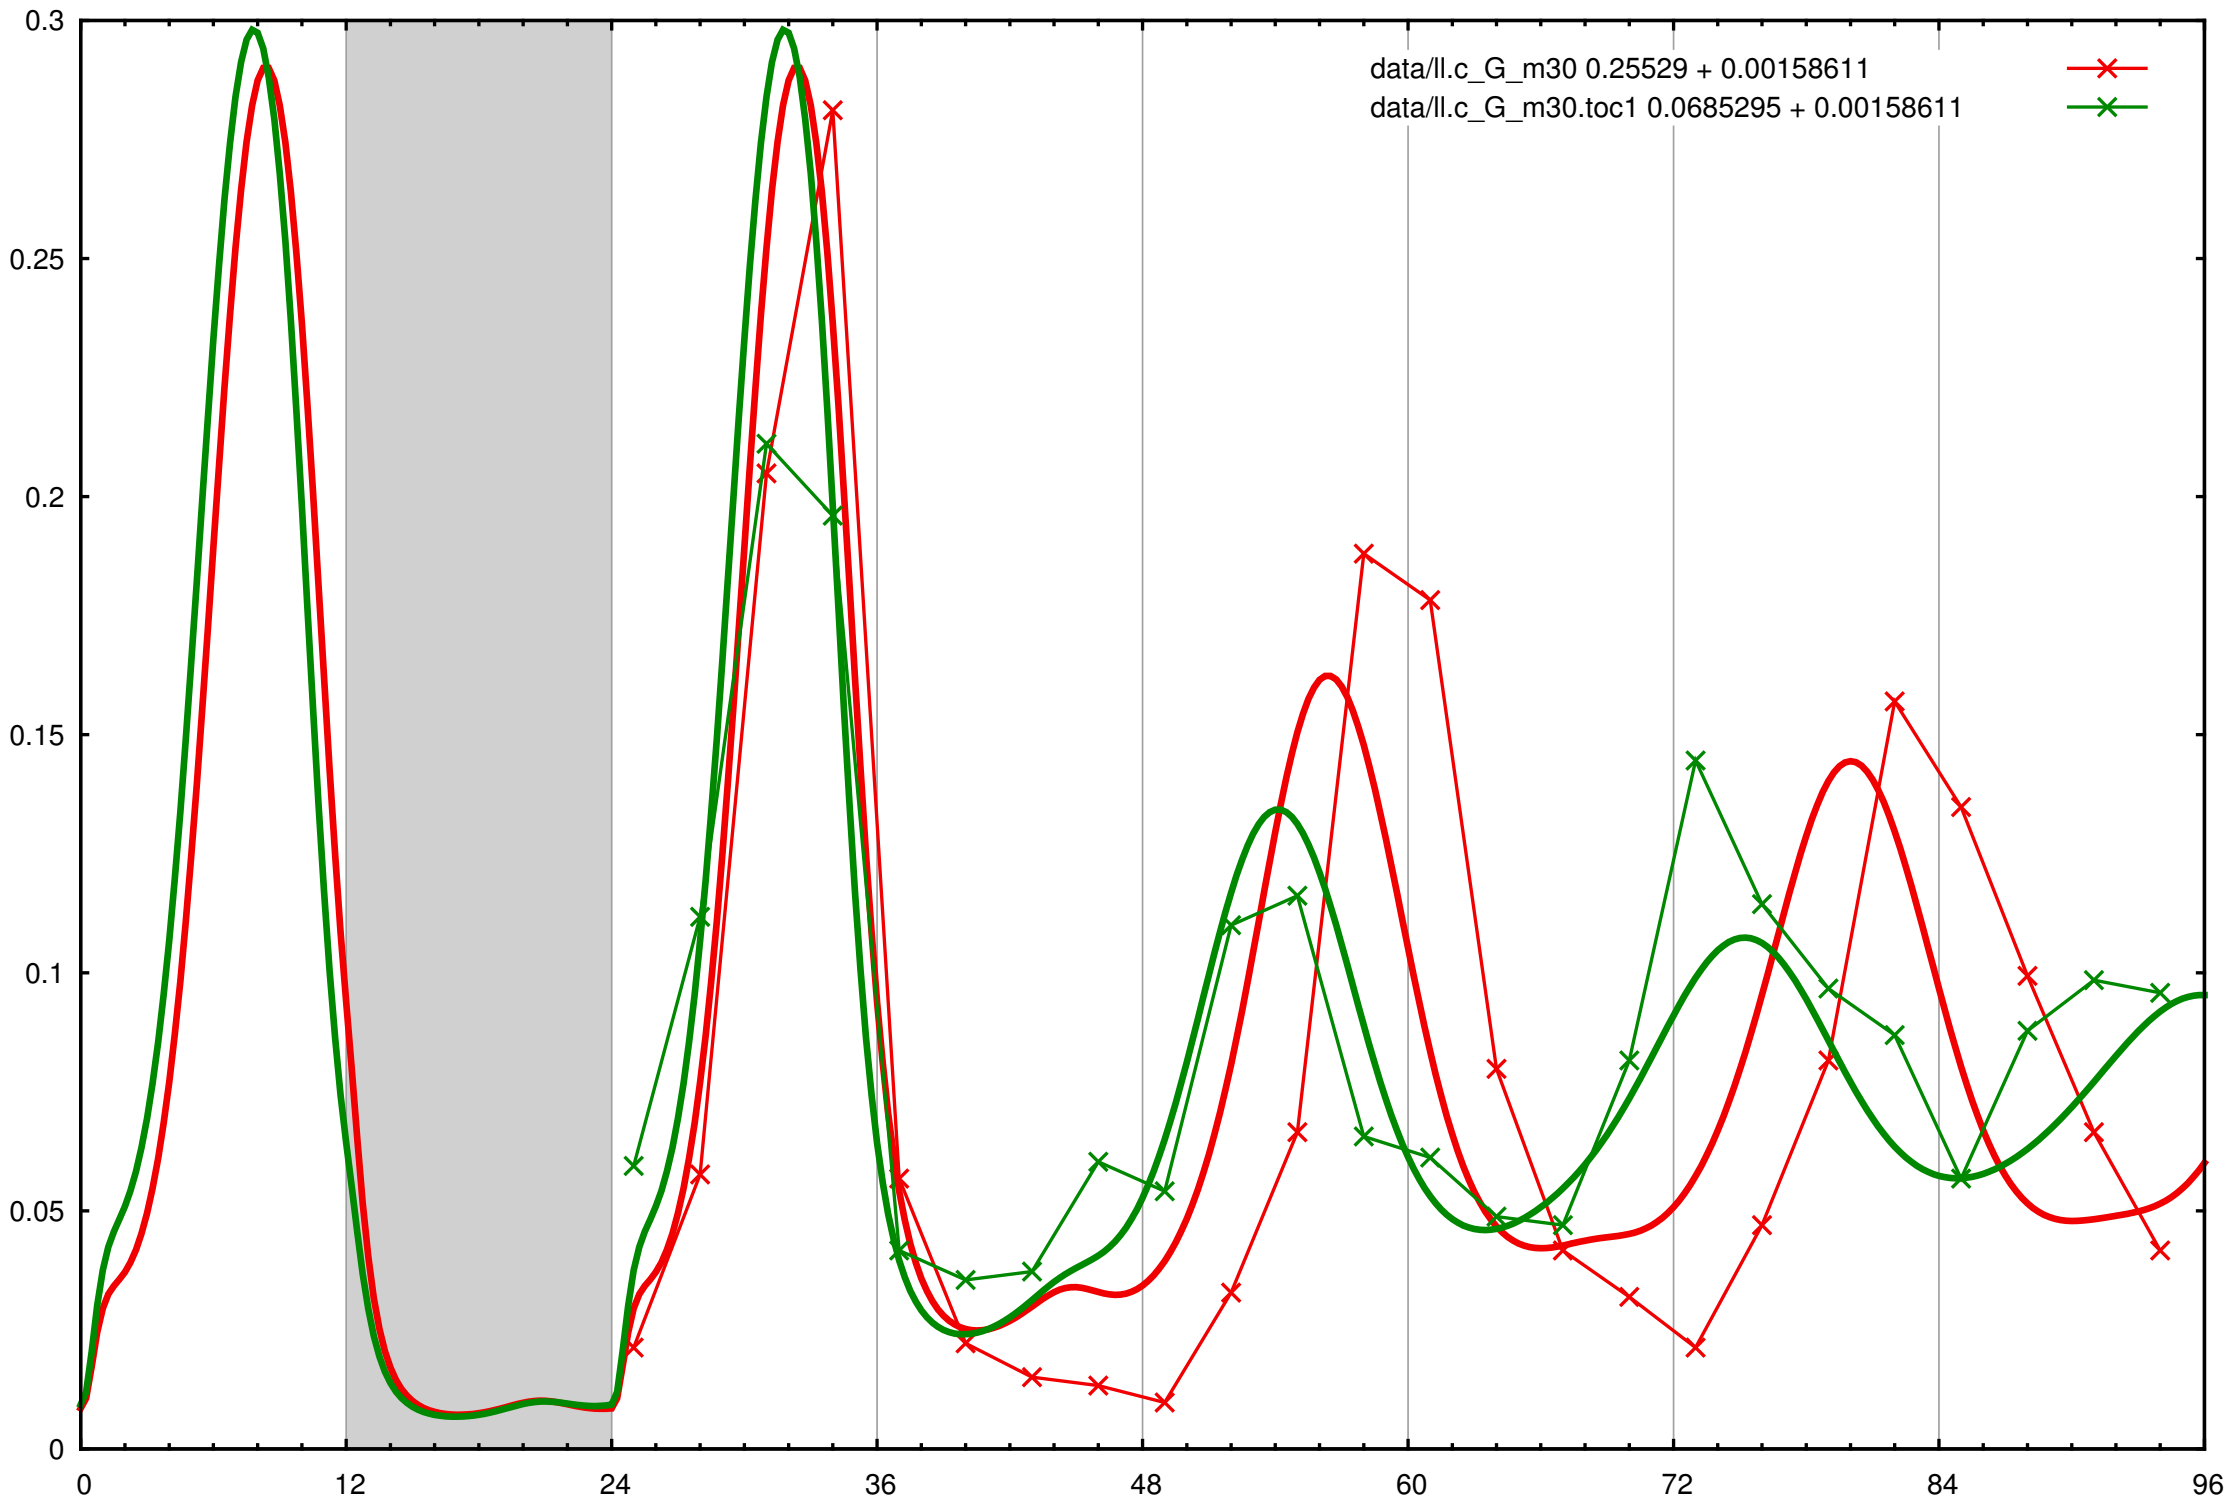

Scale group 260, scost 0

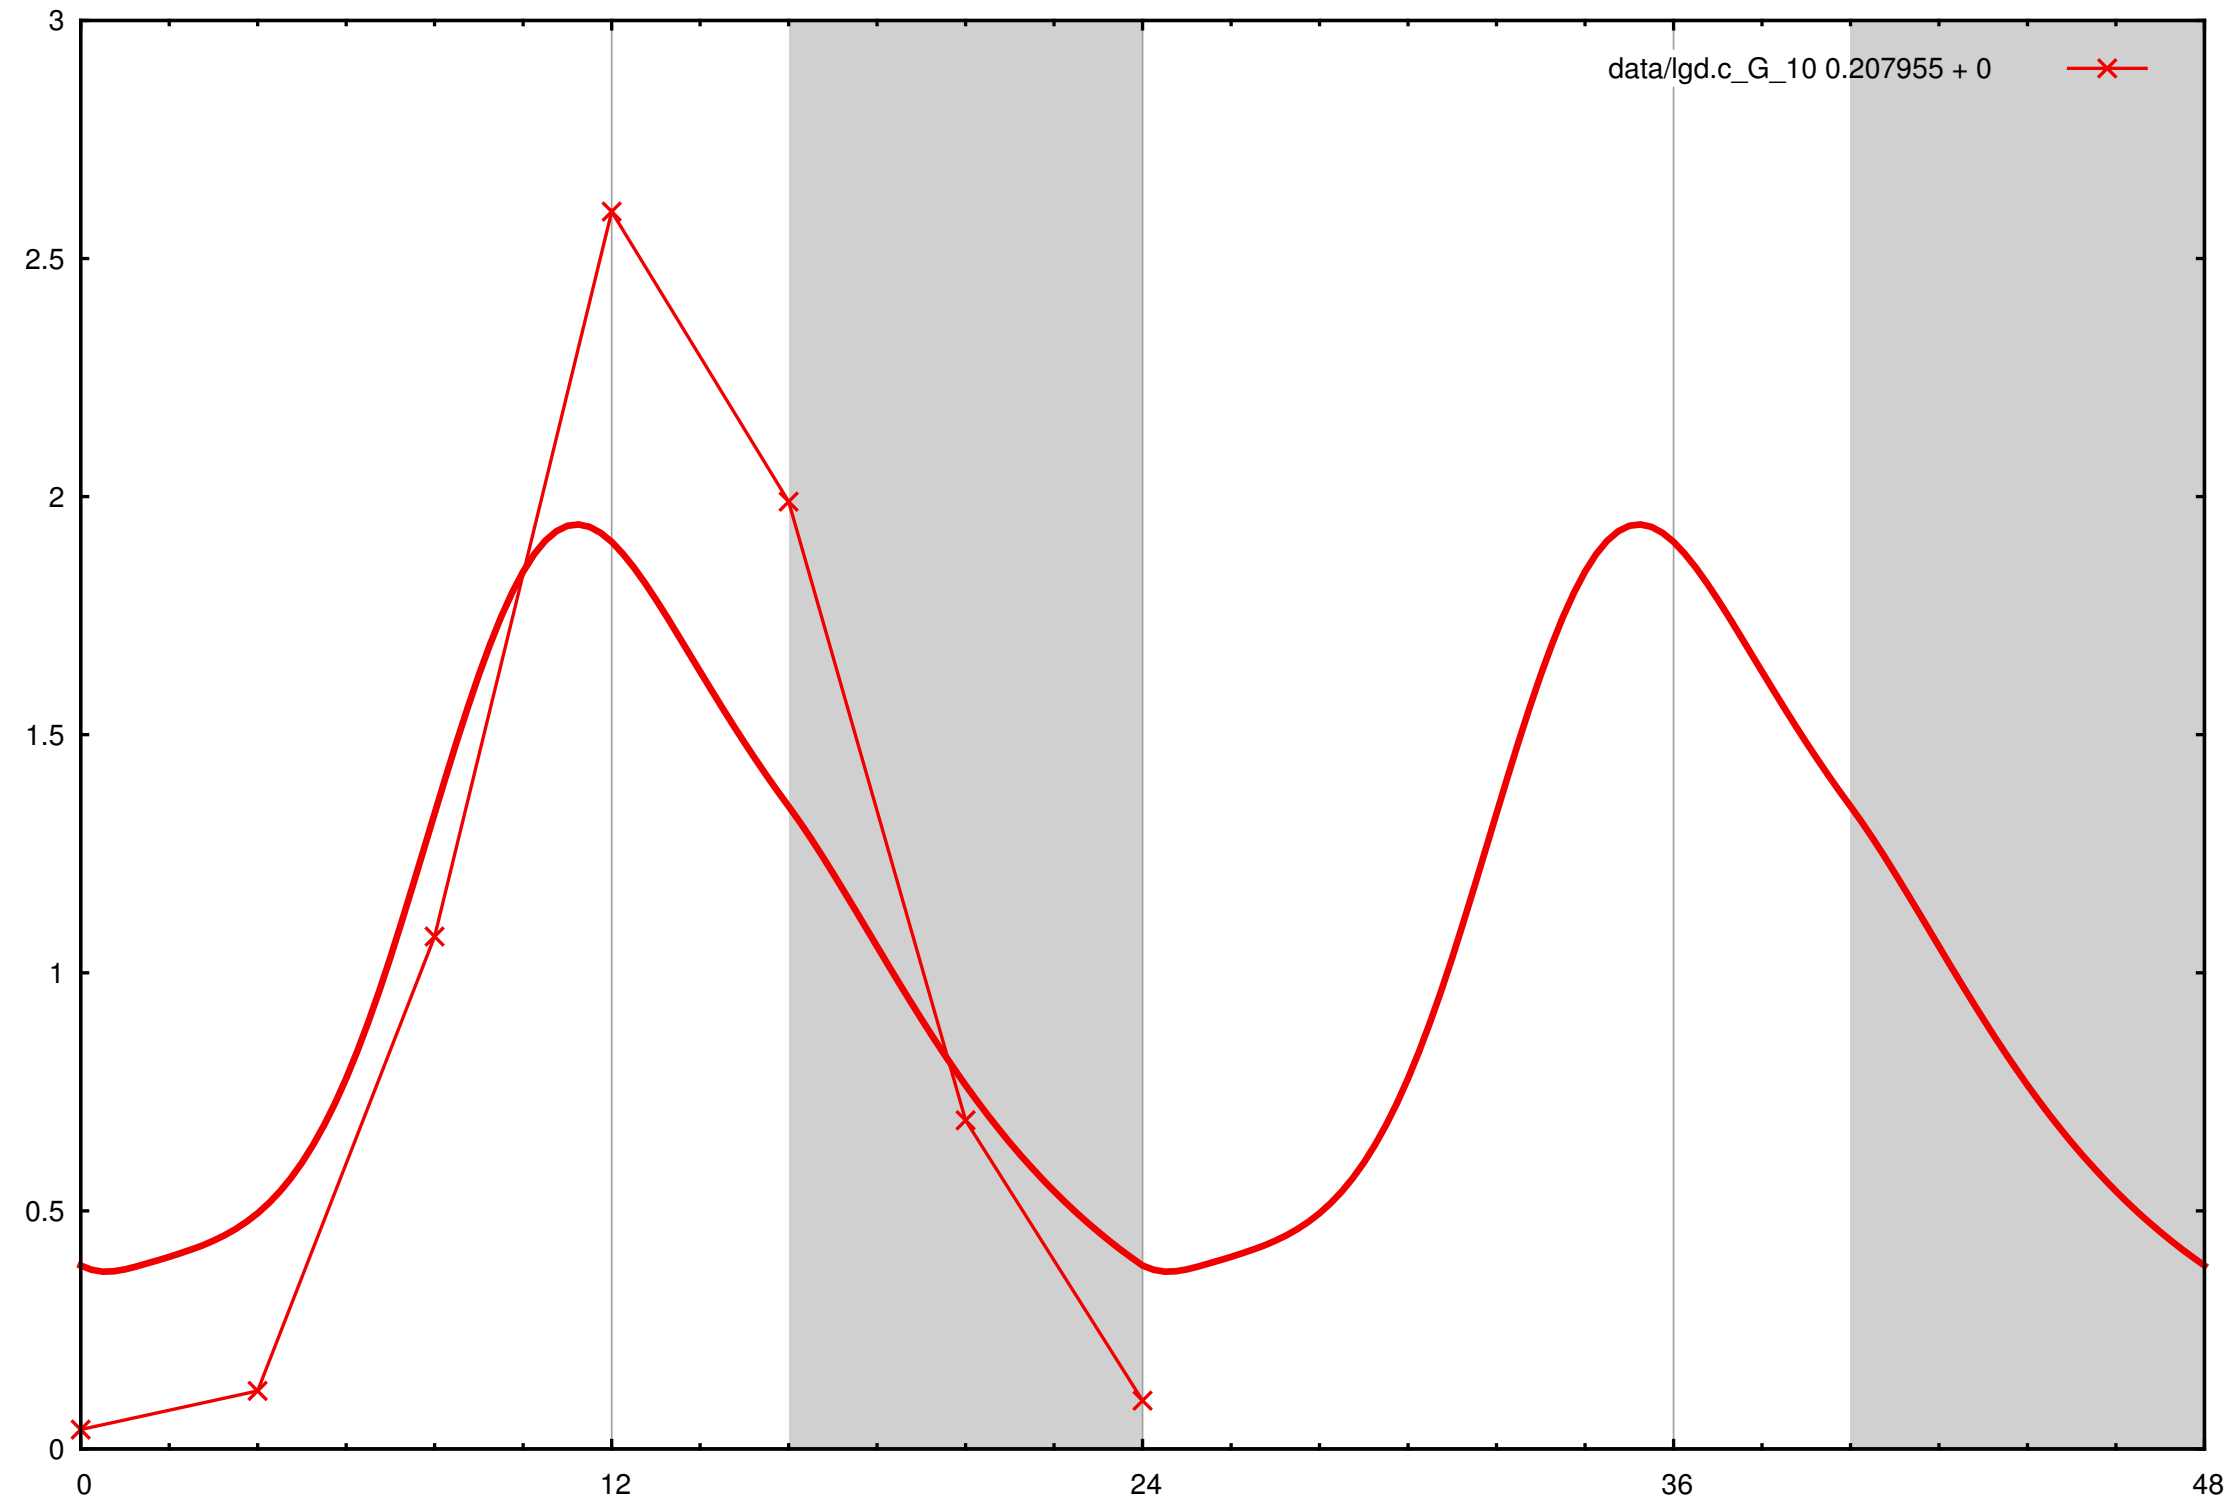

Scale group 261, scost 0

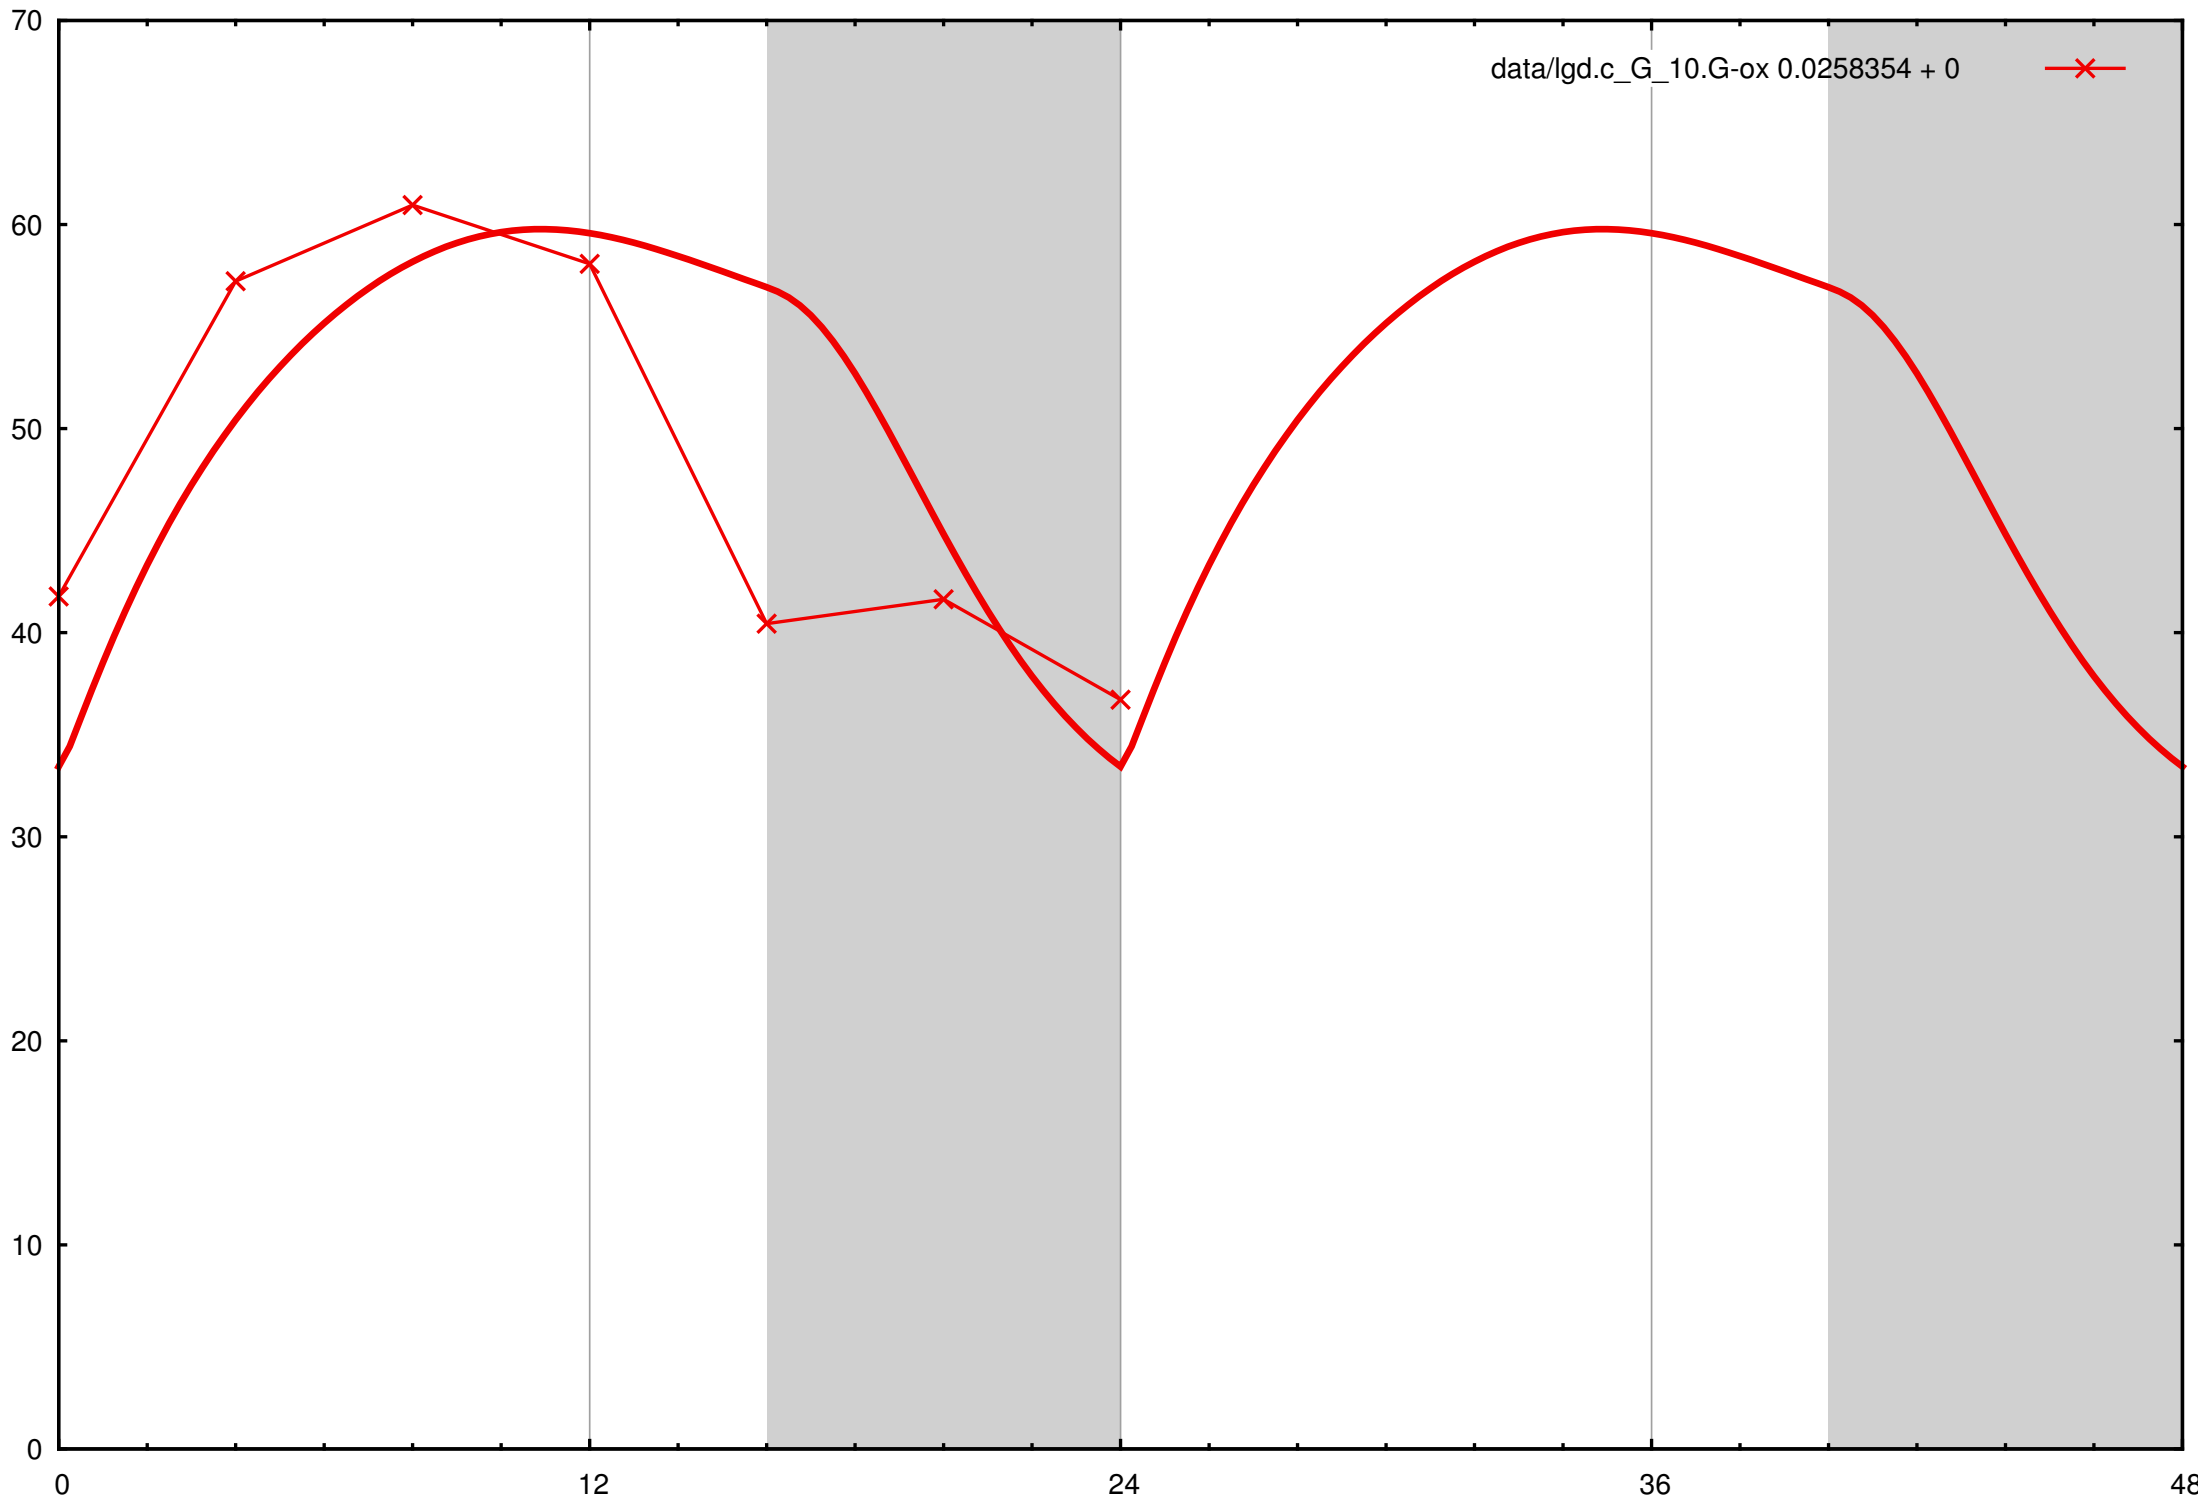

Scale group 262, scost 0

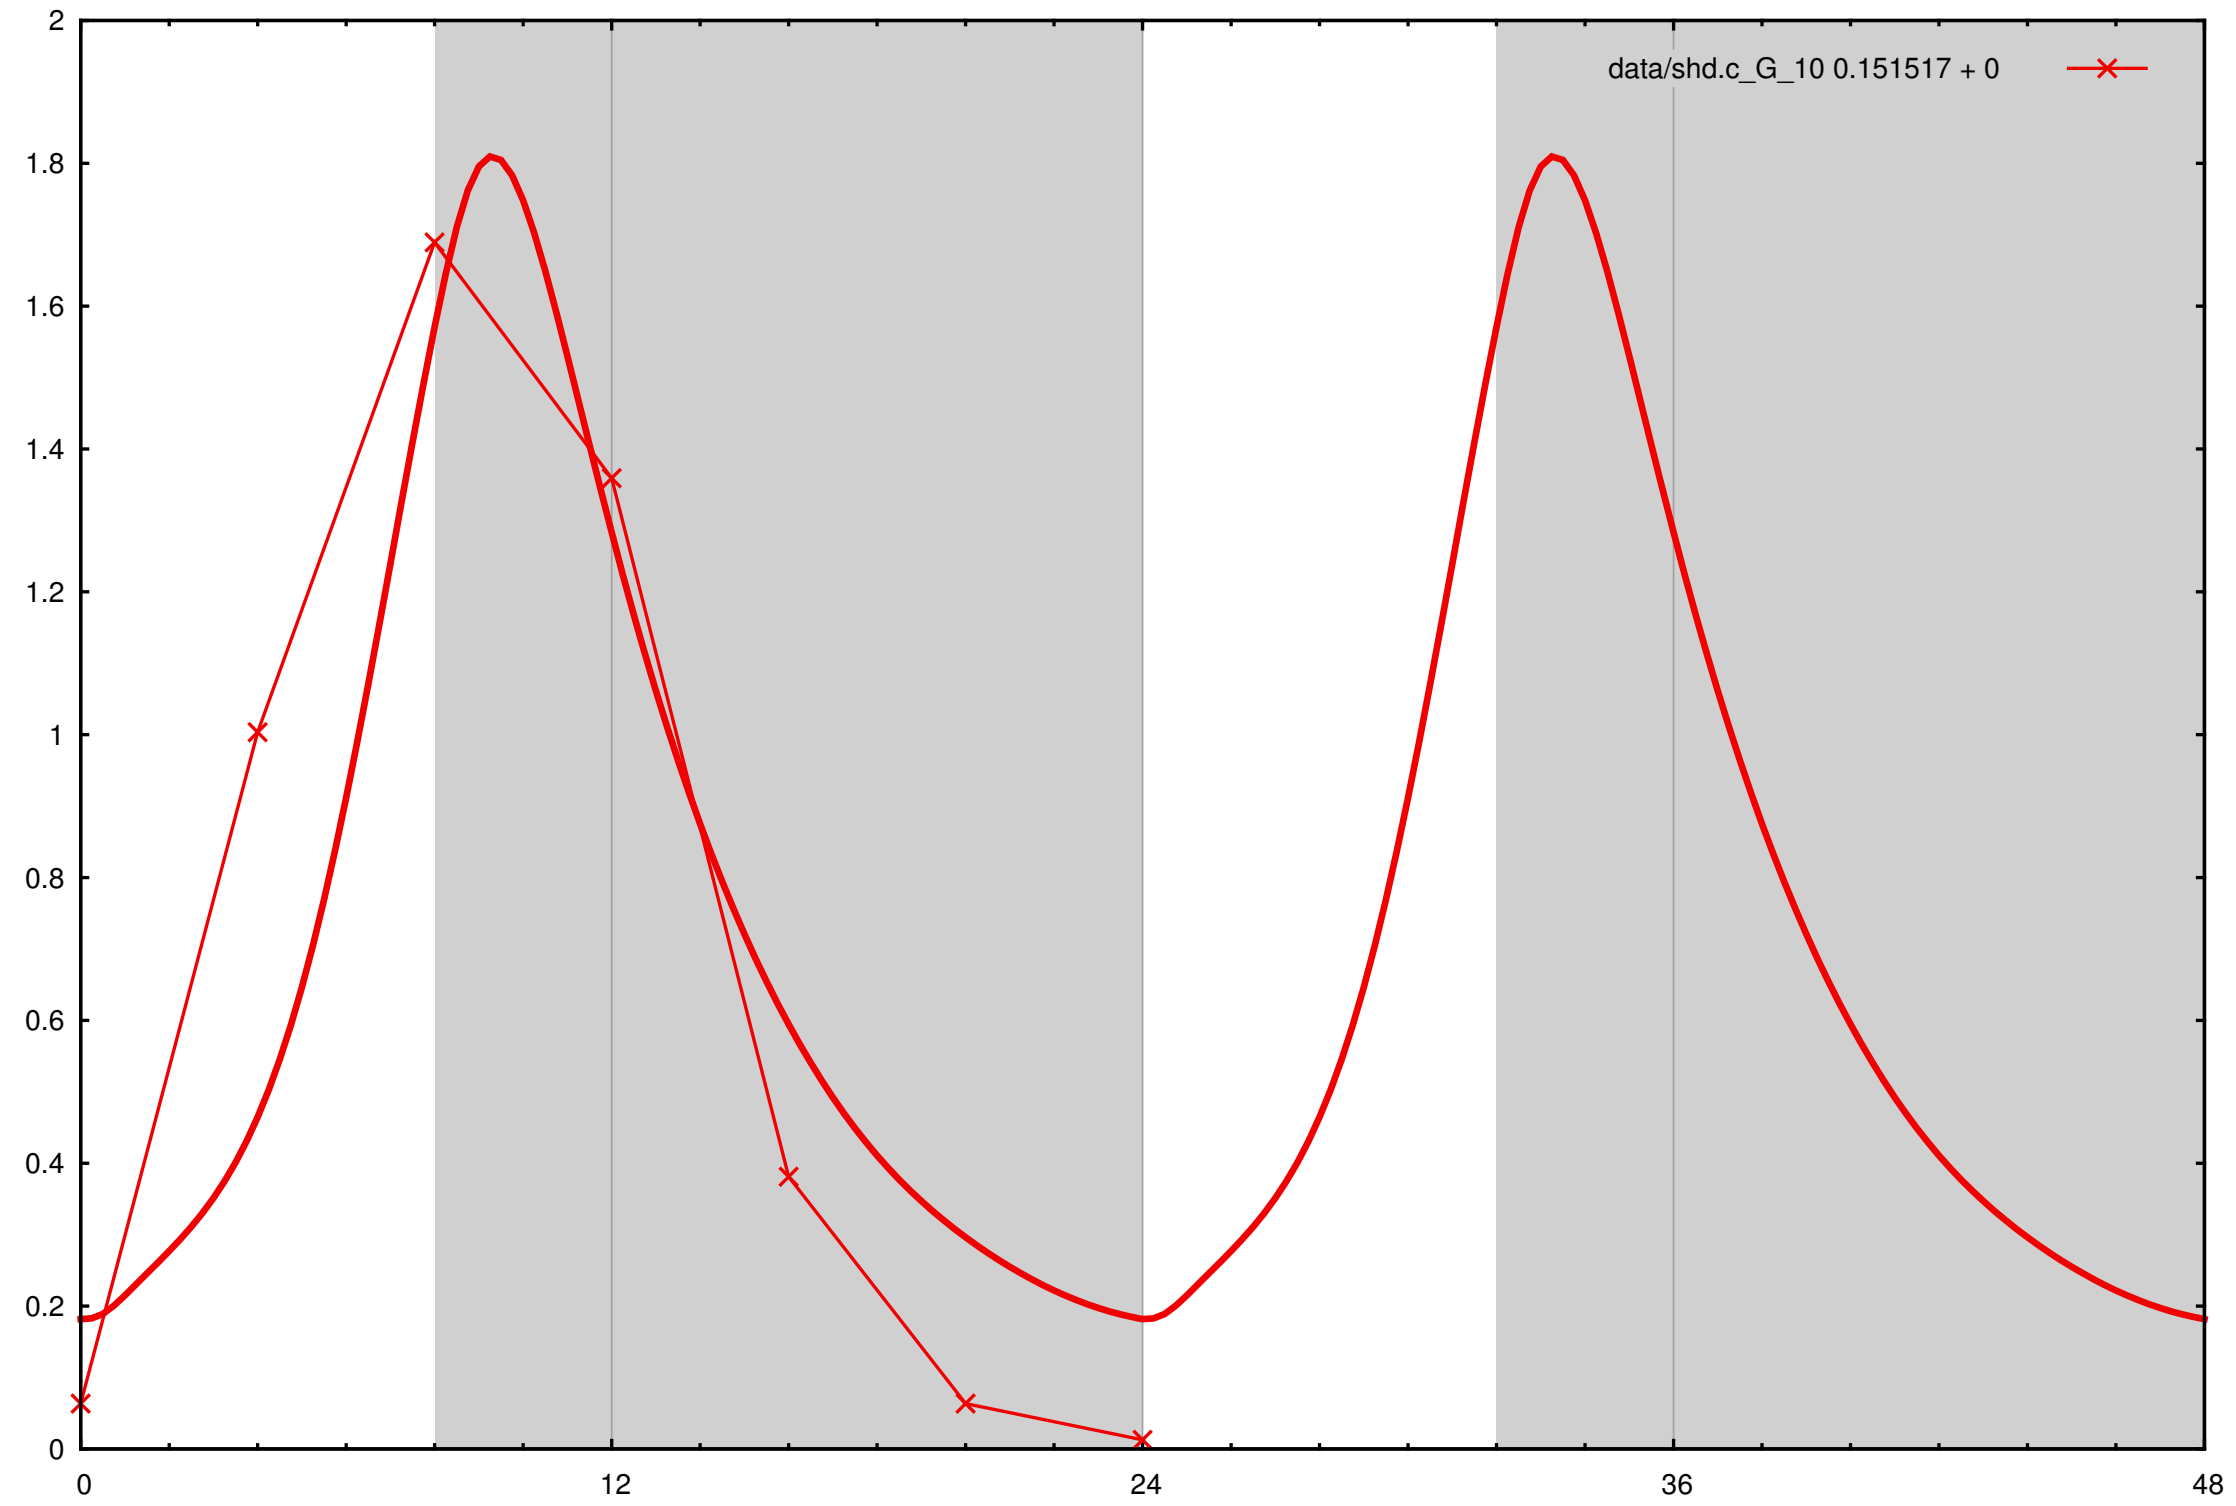

Scale group 263, scost 0

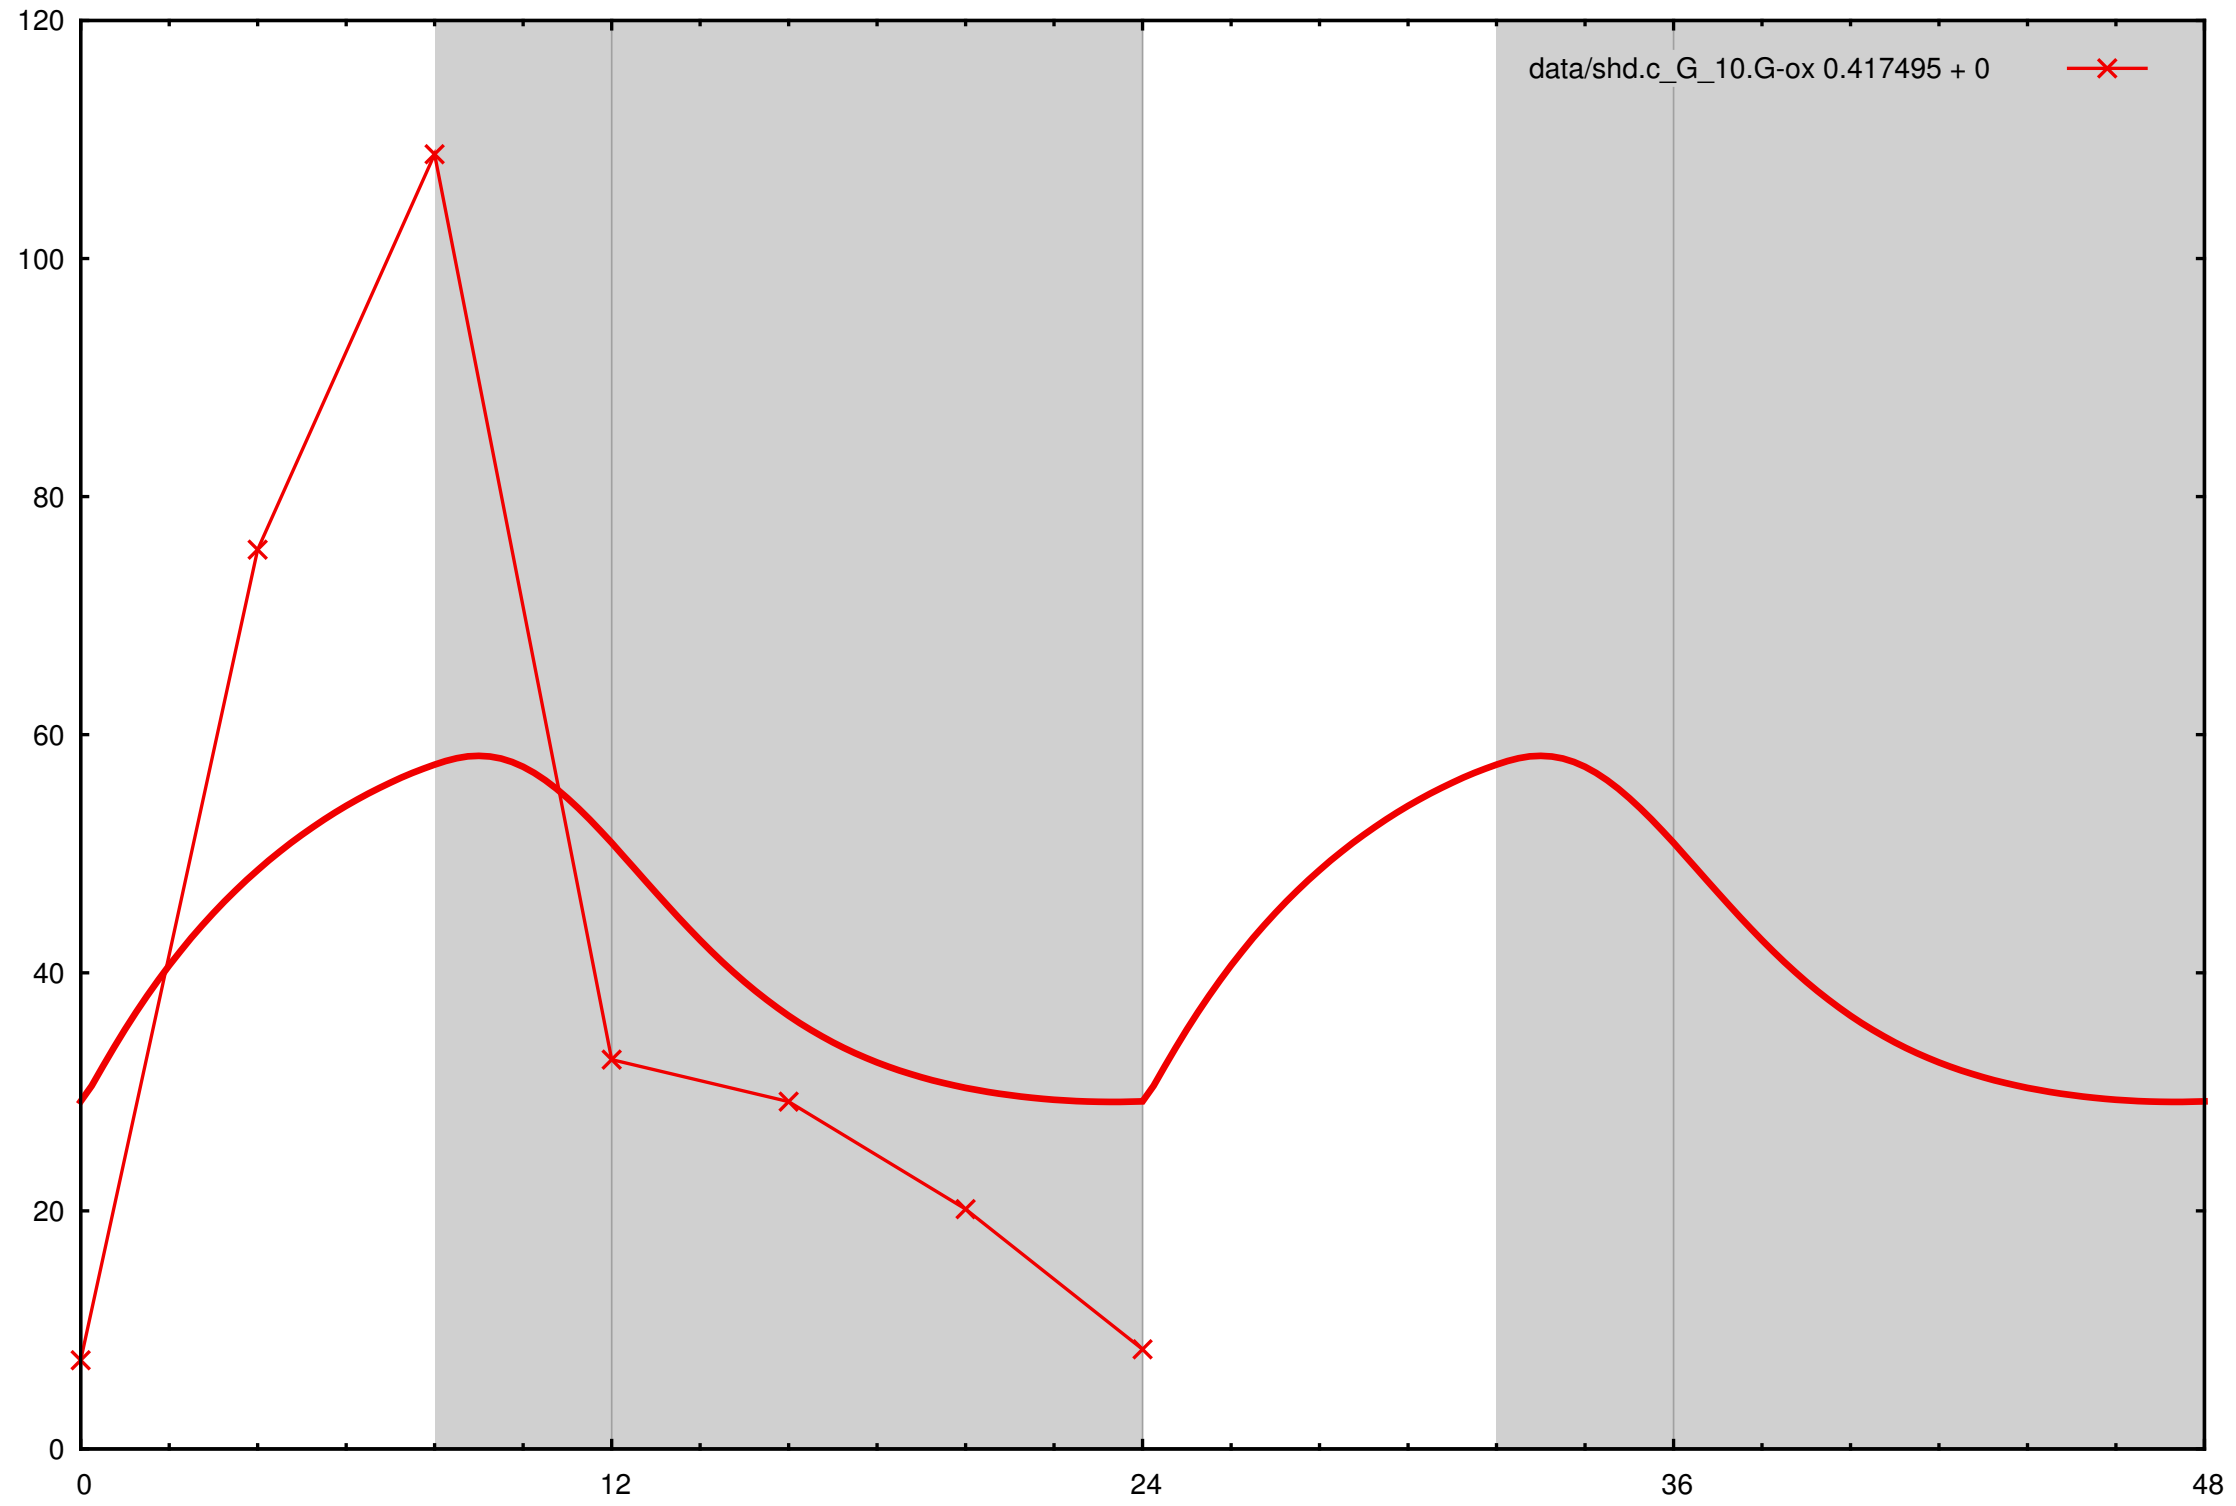

Scale group 264, scost 0

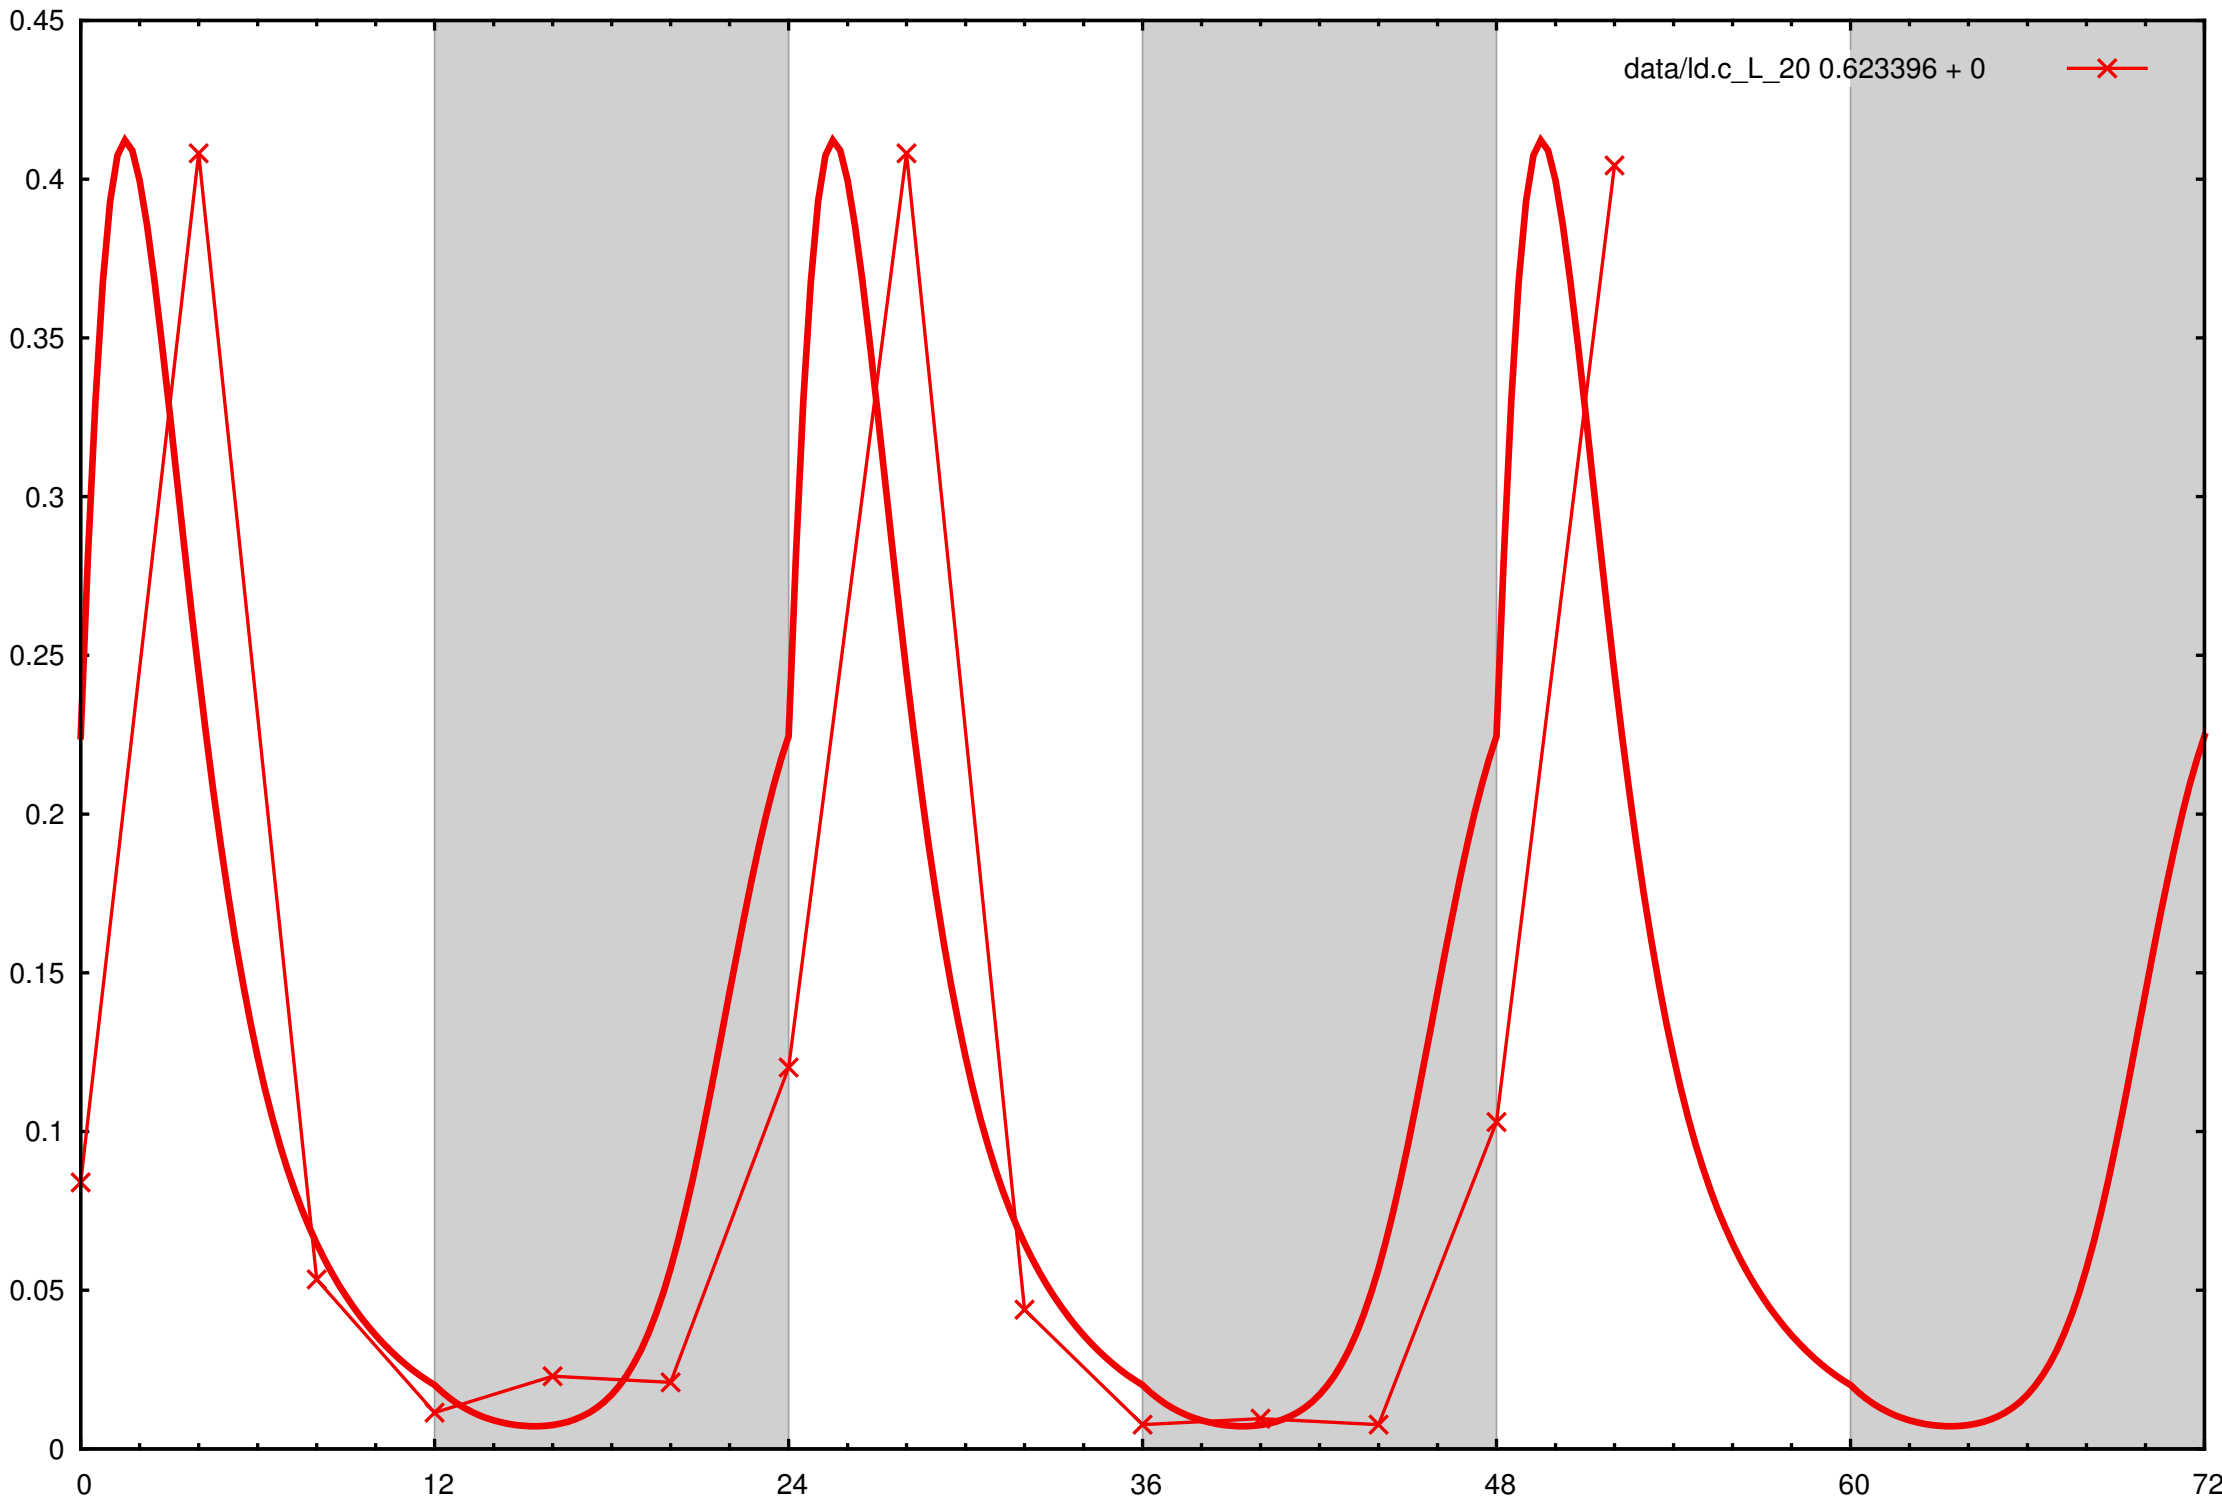



Scale group 265, scost 0

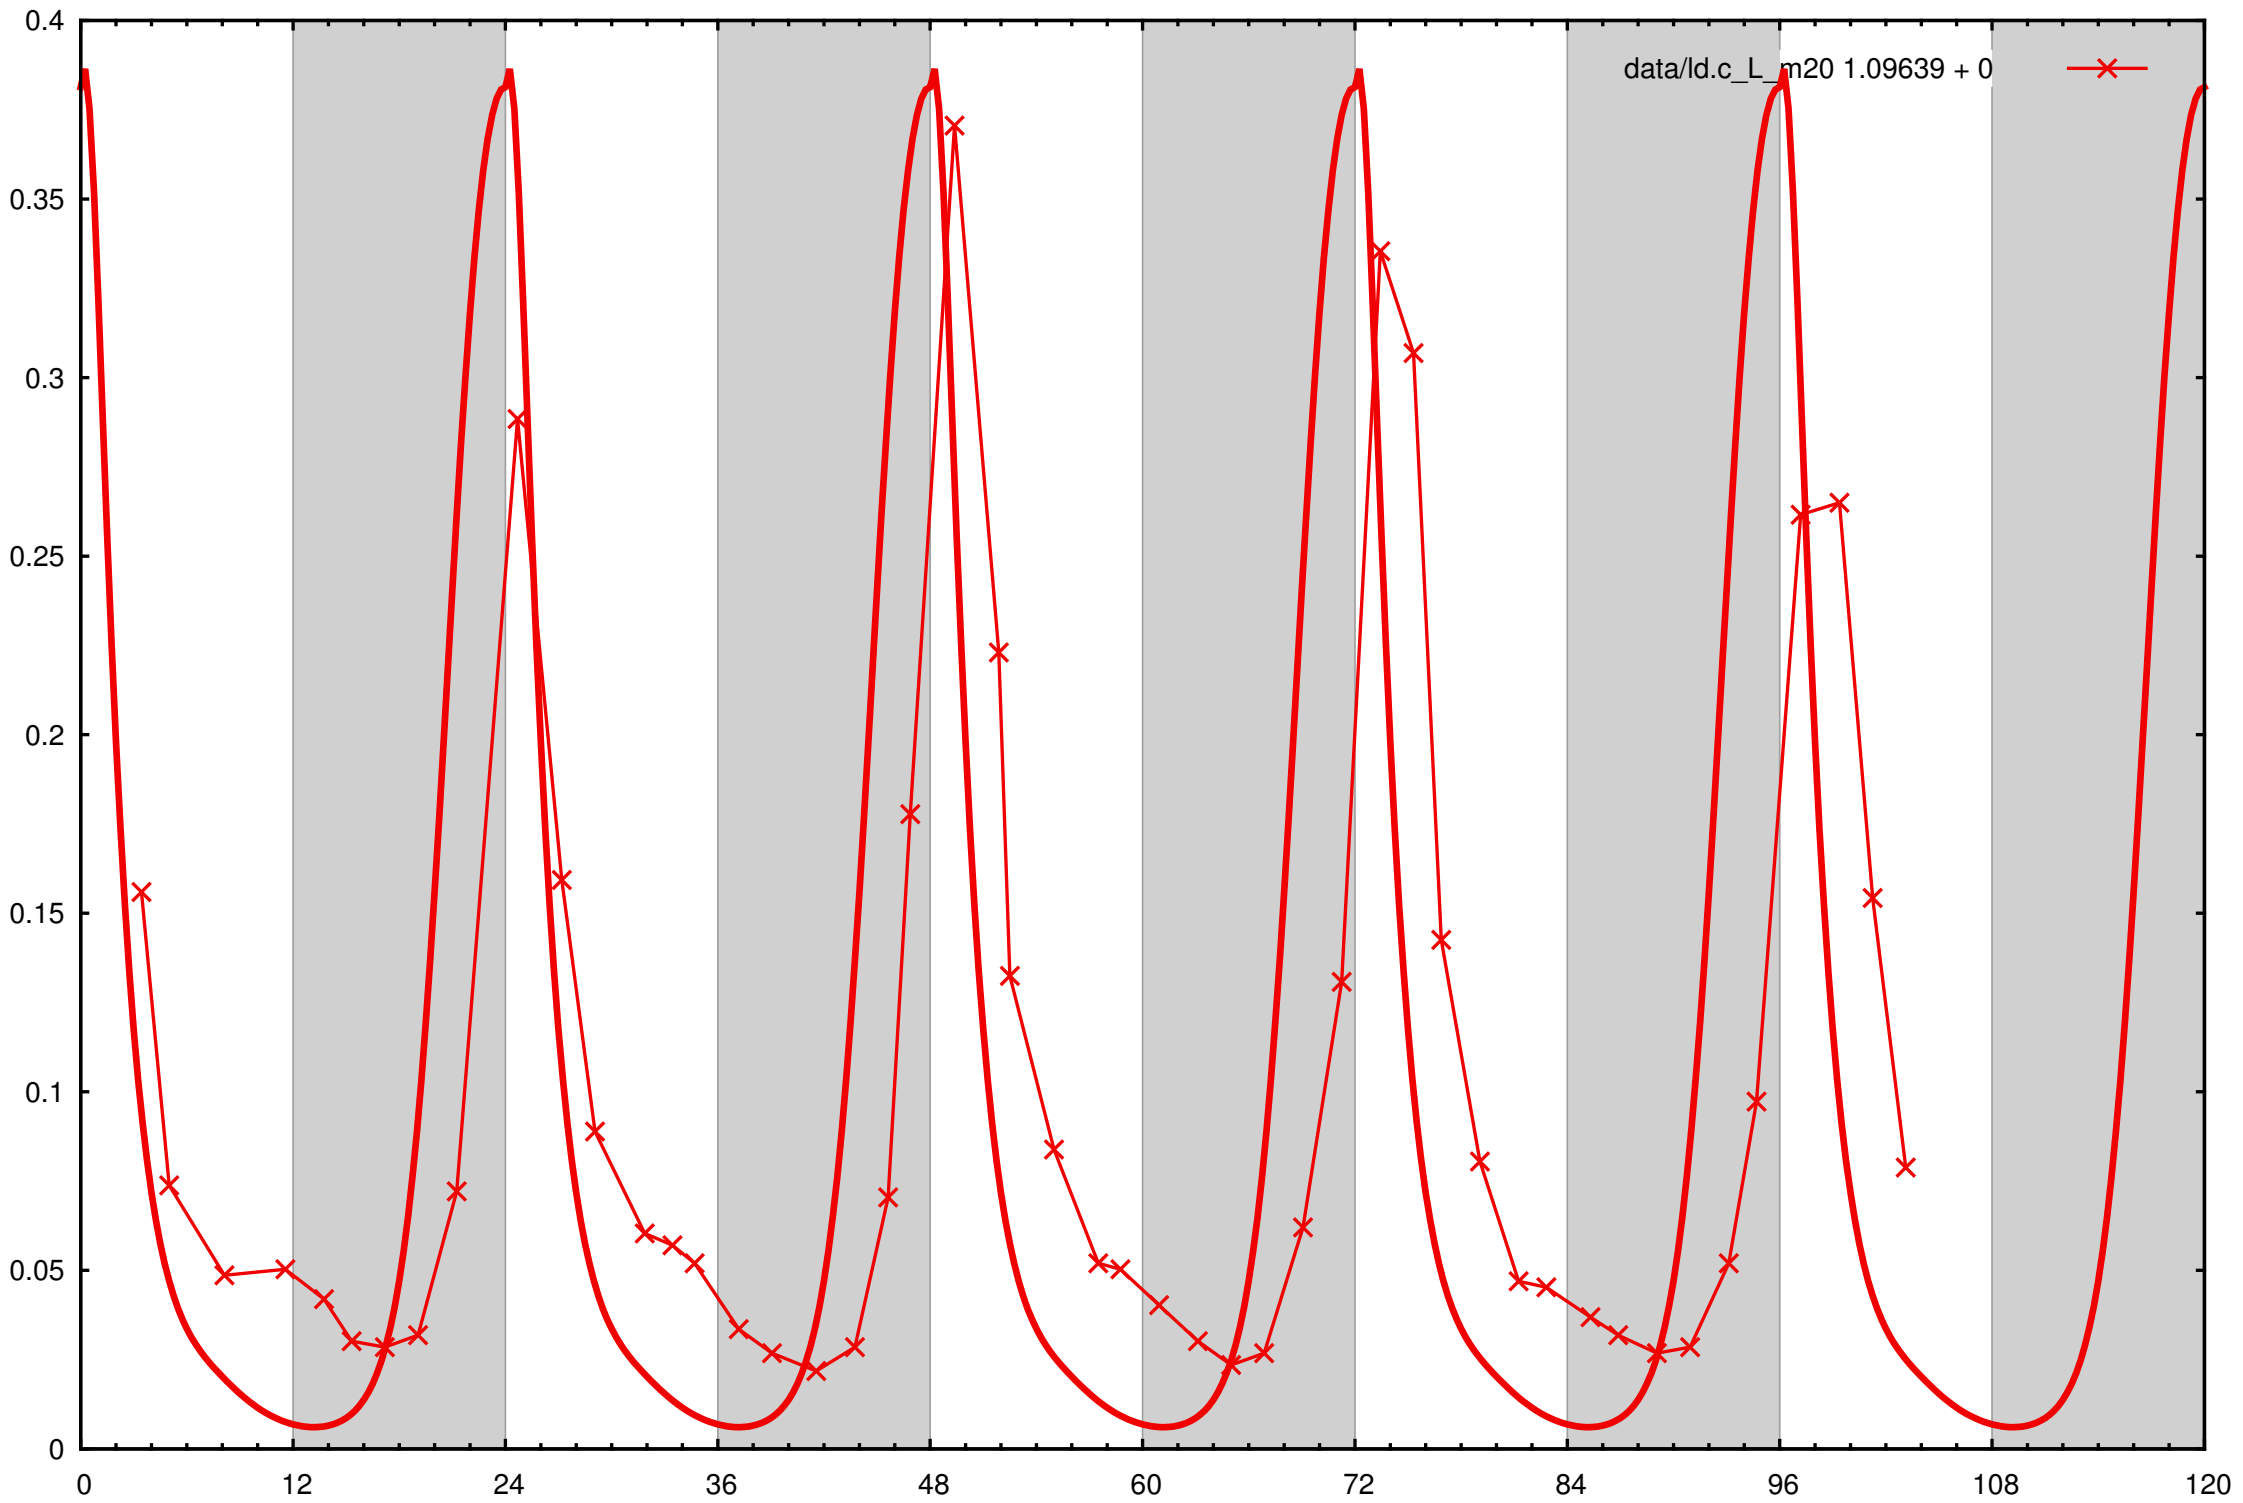

Scale group 266, scost 0

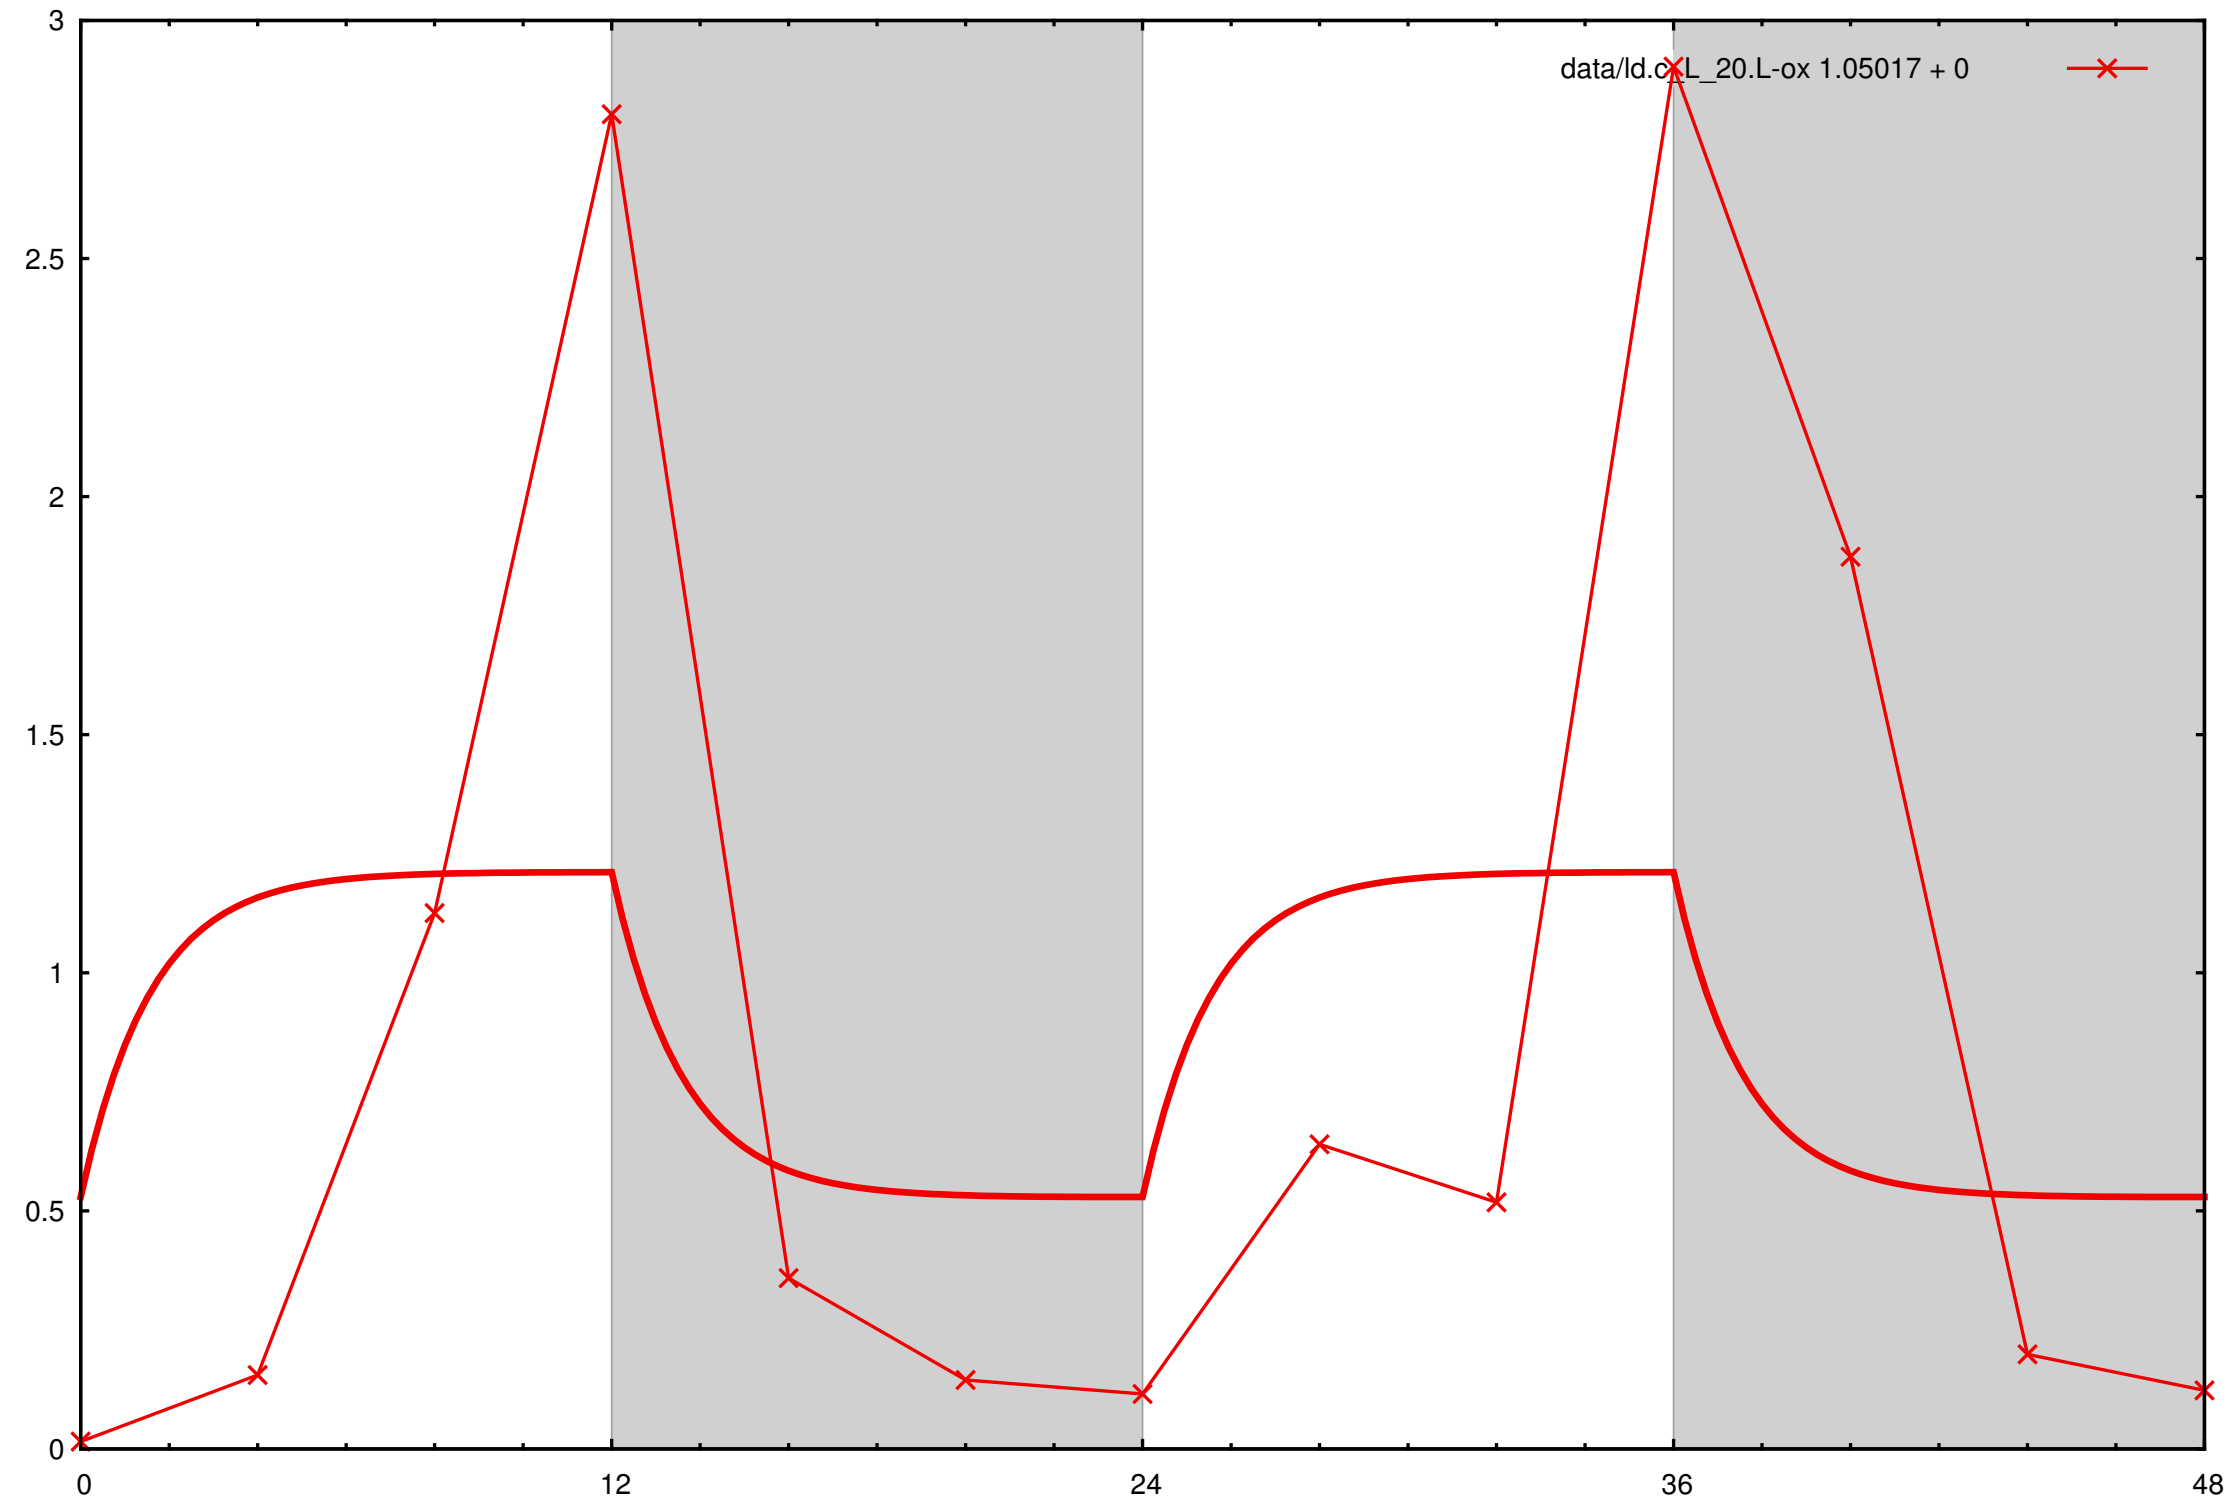

Scale group 267, scost 0.0150833

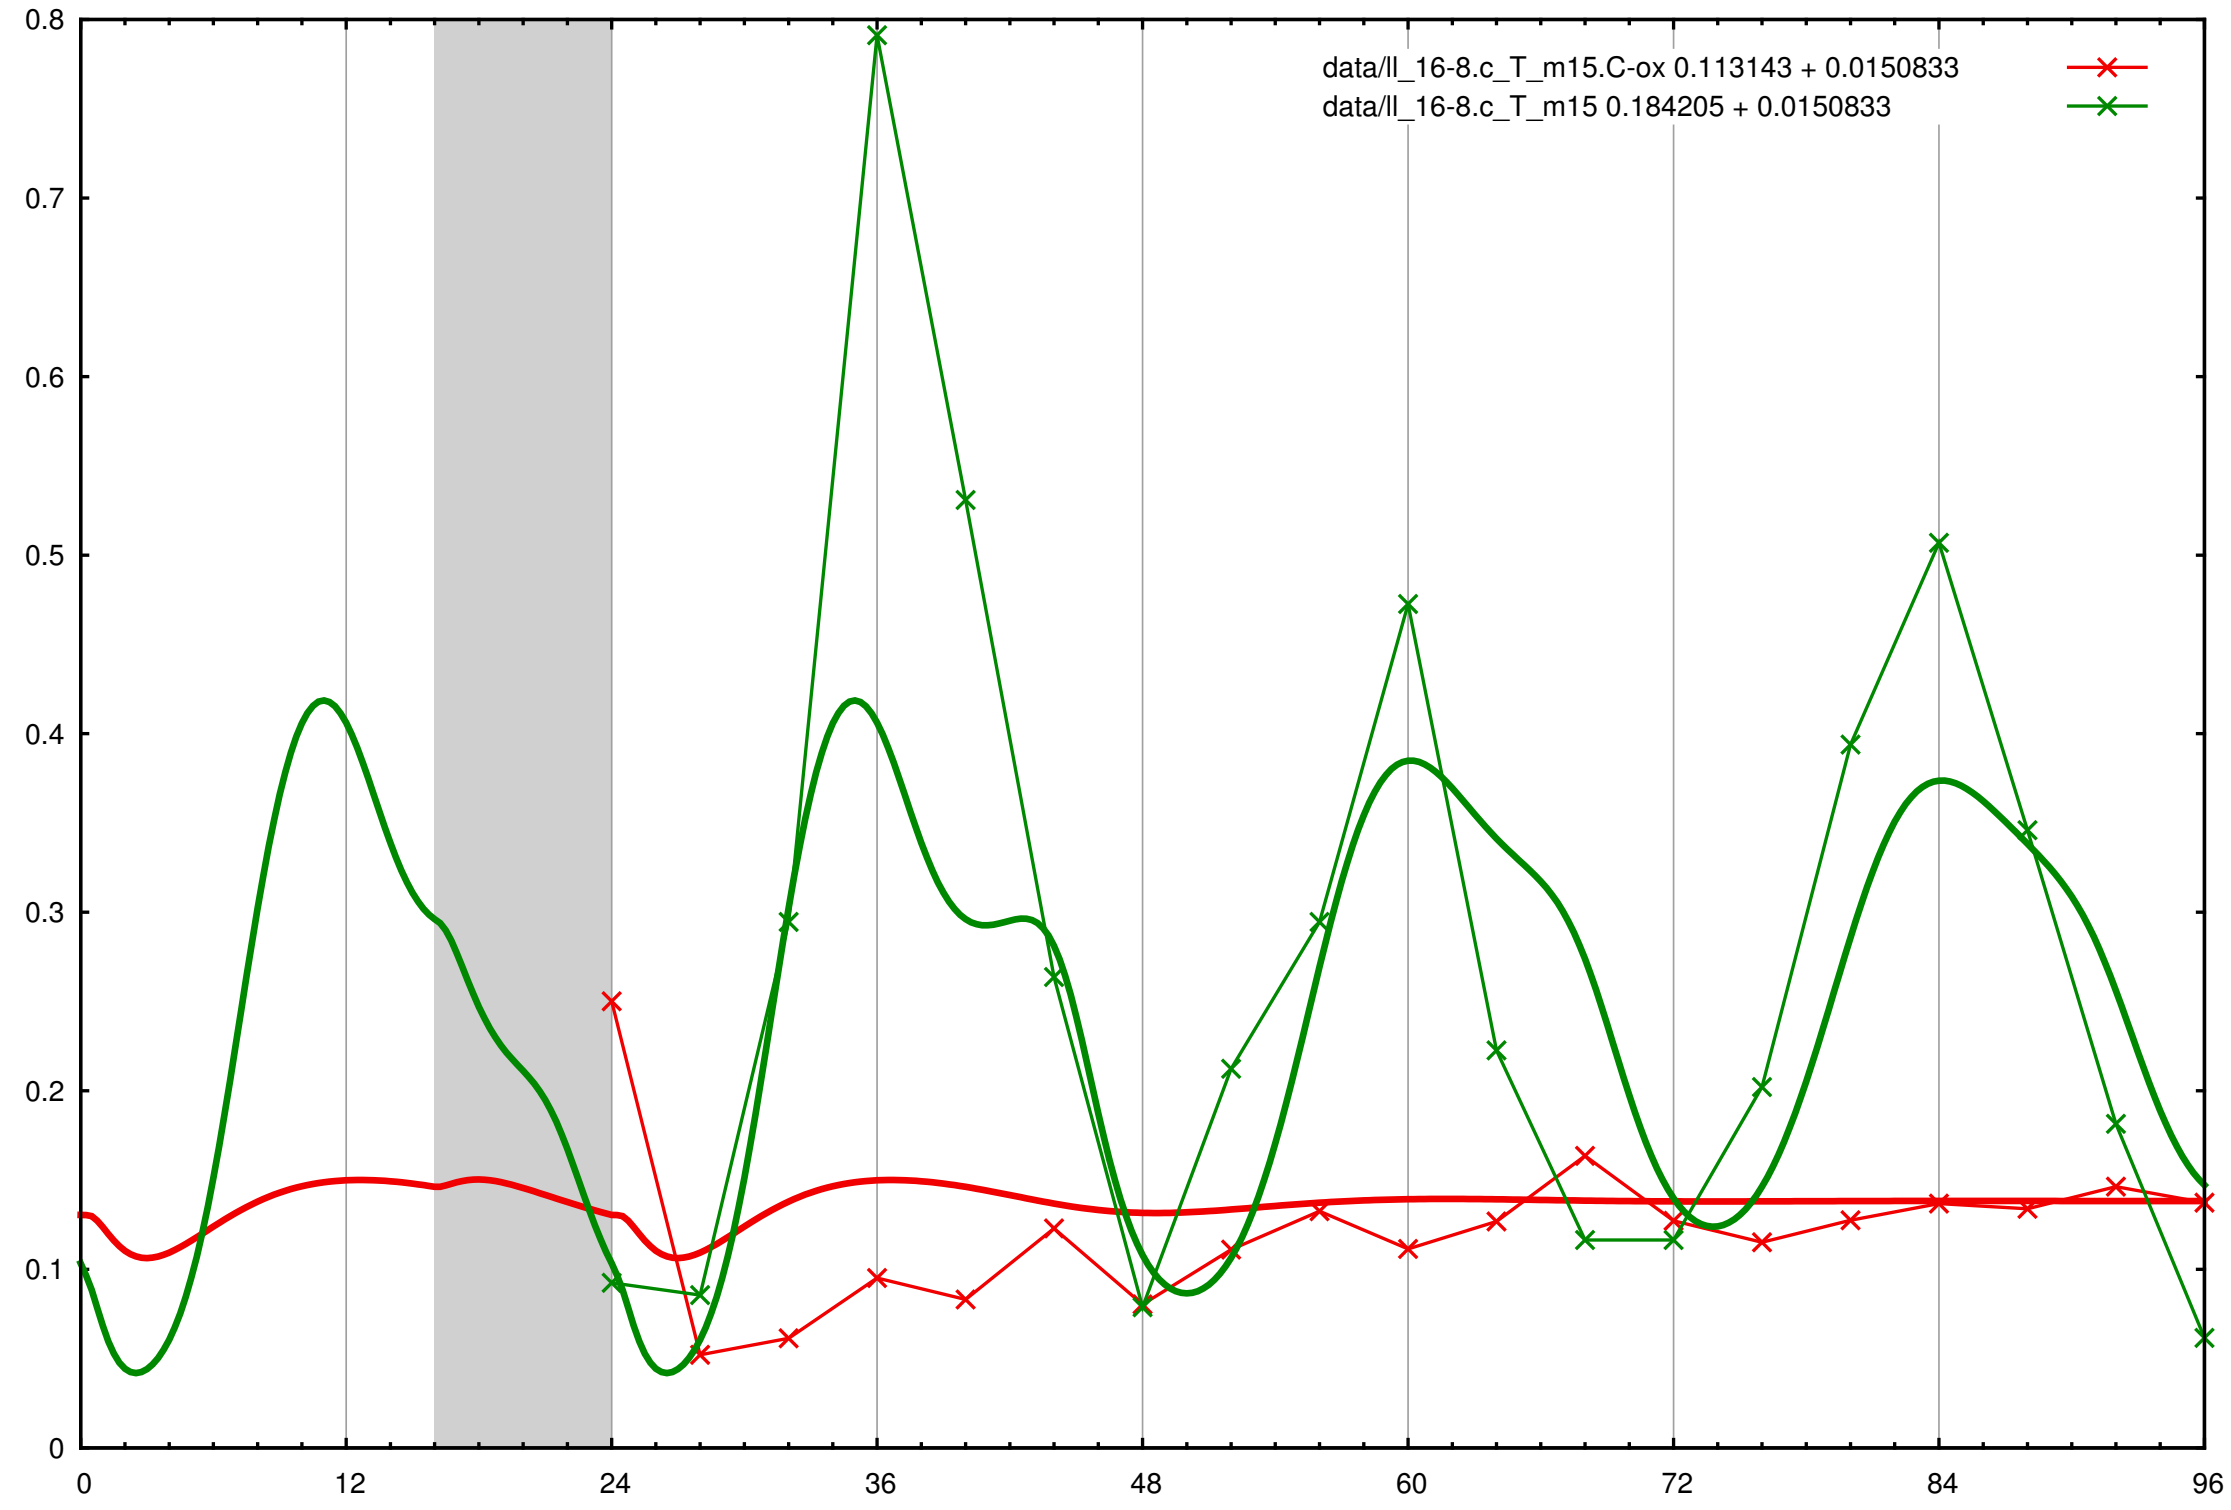

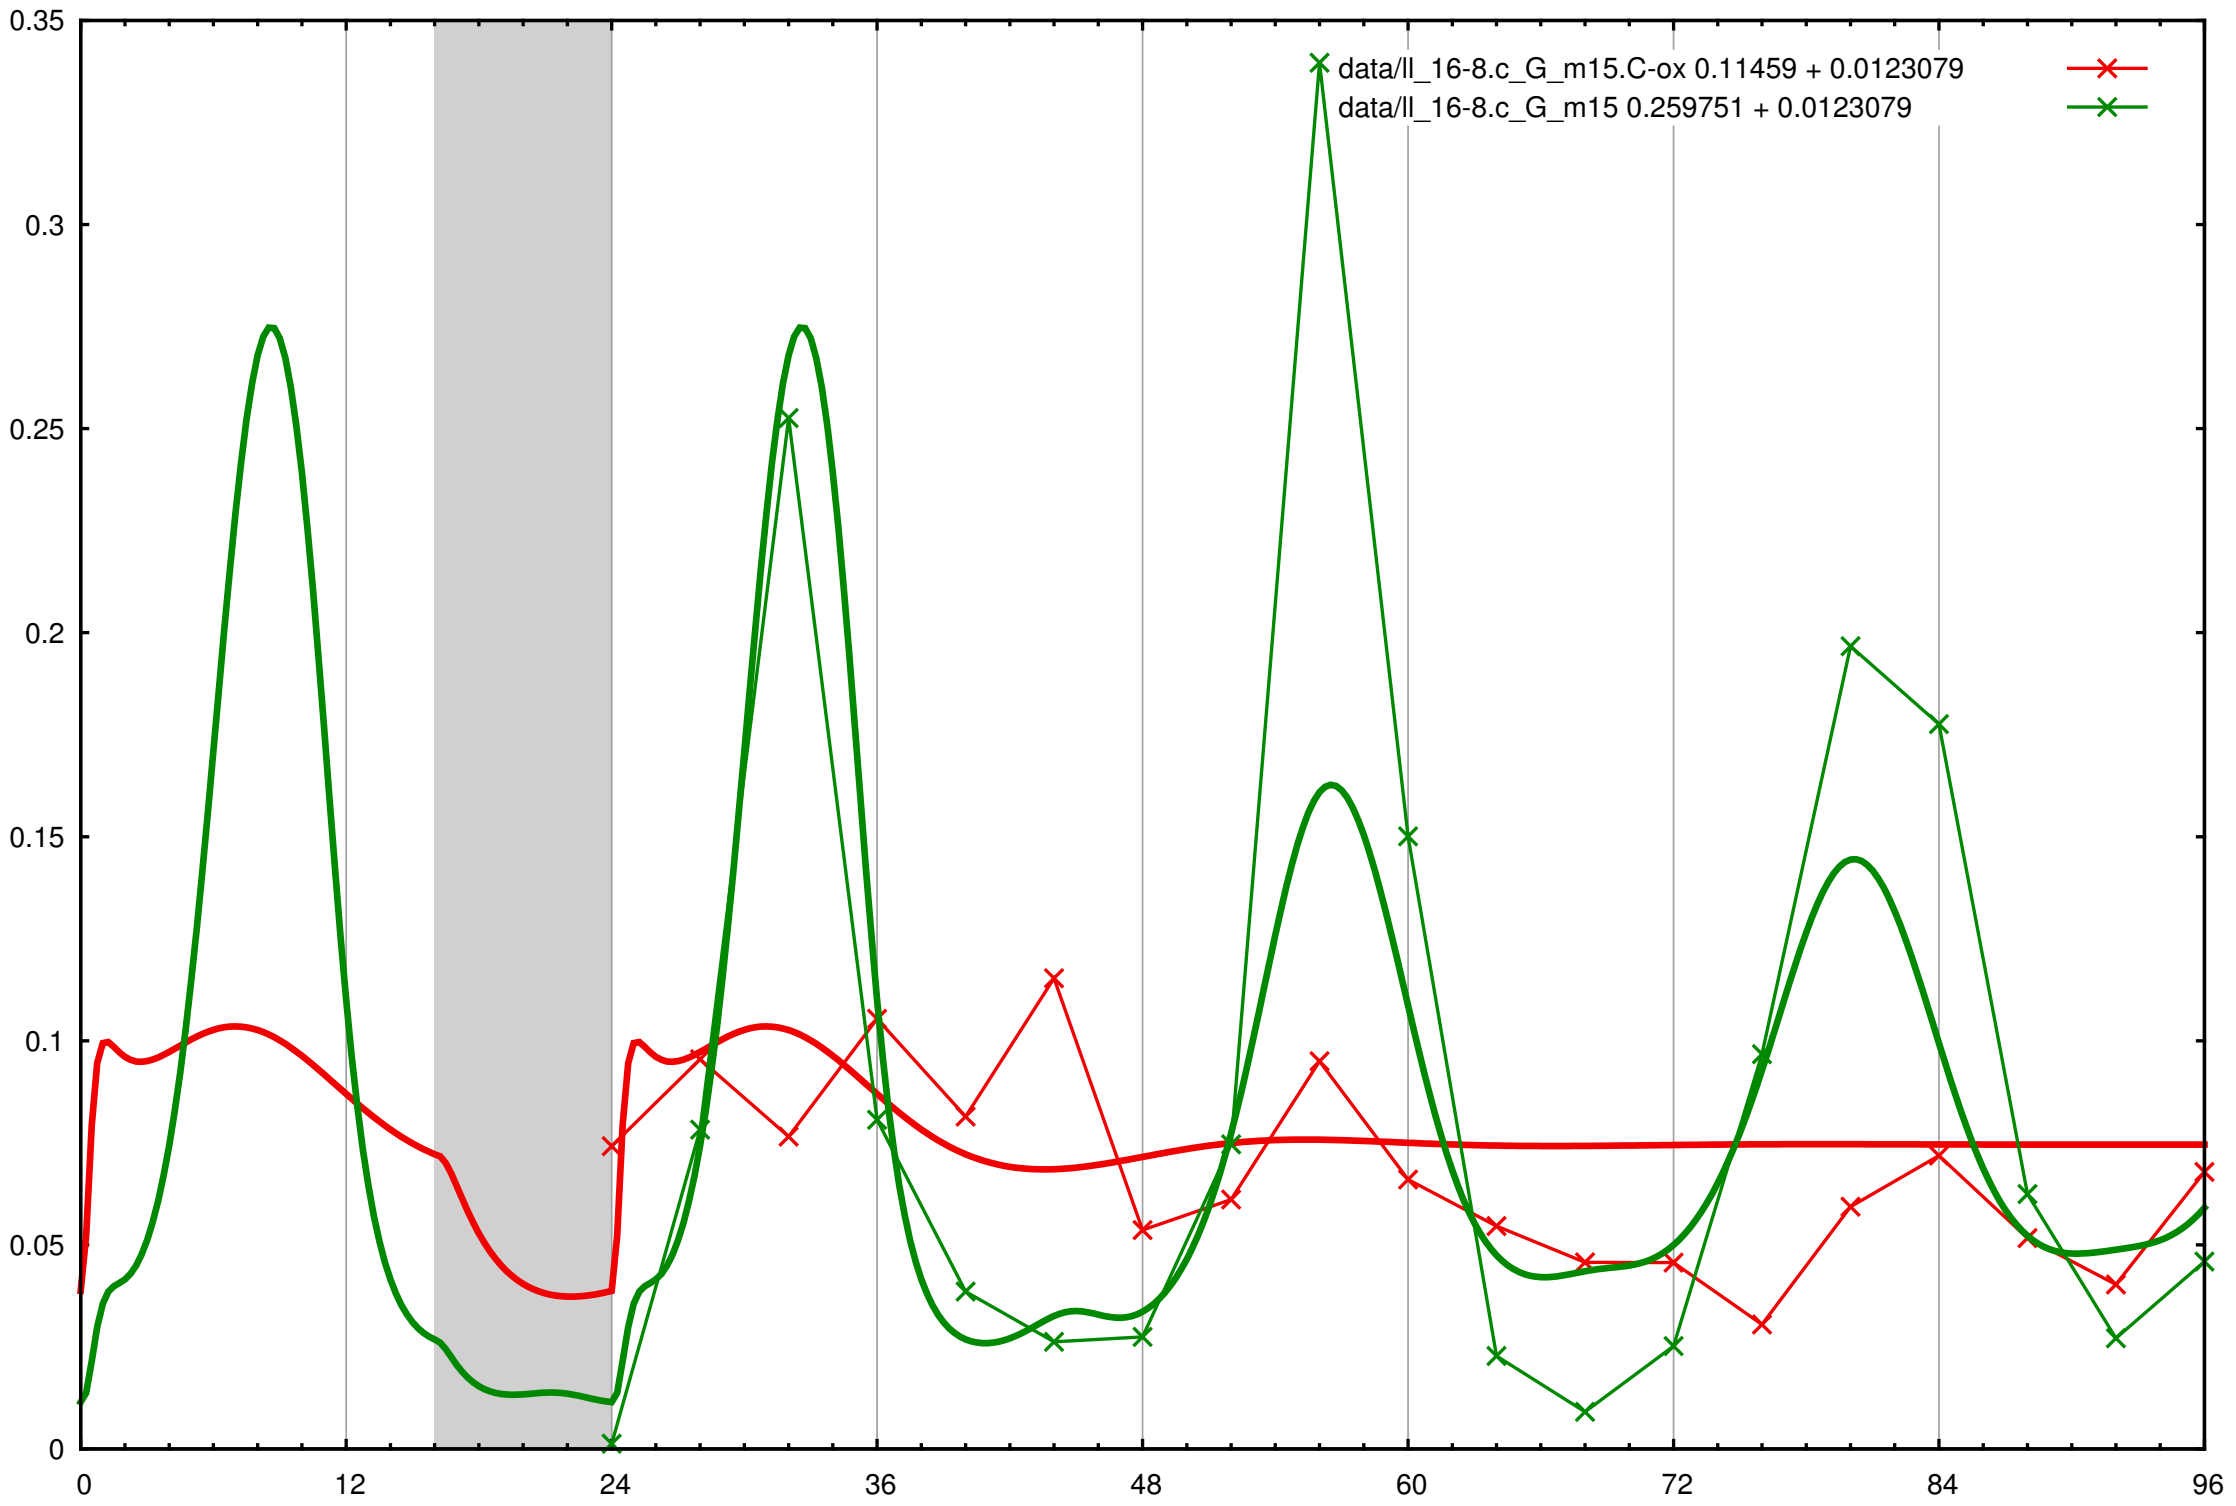

Scale group 269, scost 0

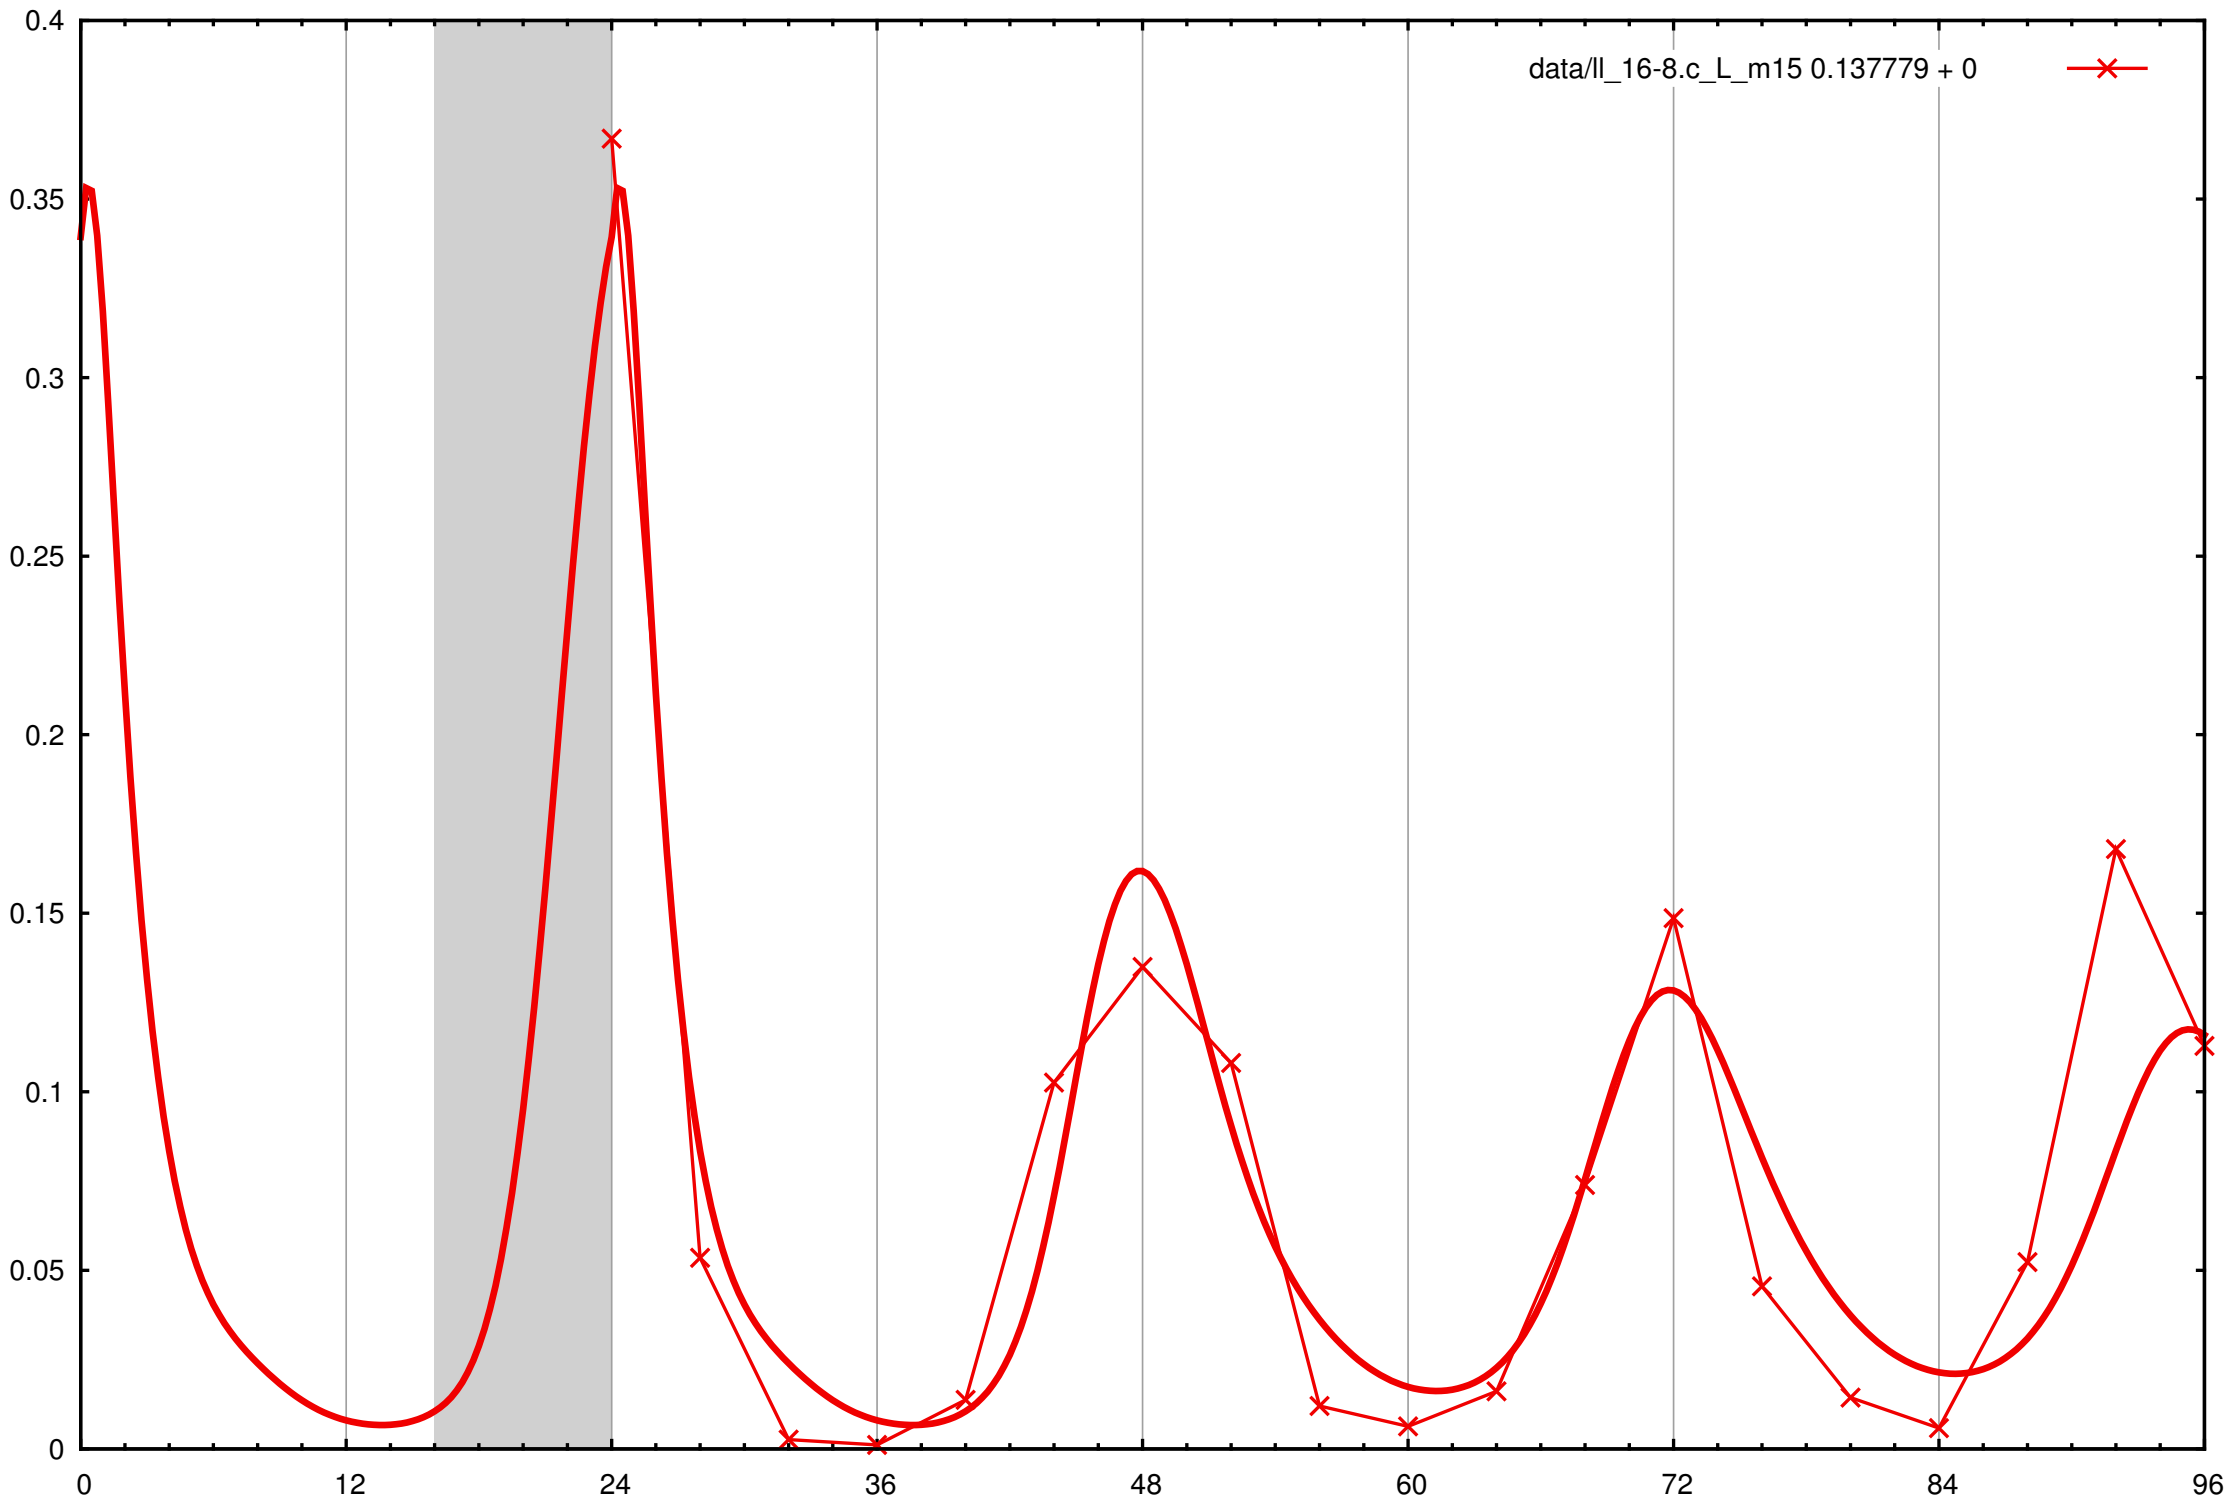

Scale group 270, scost 0

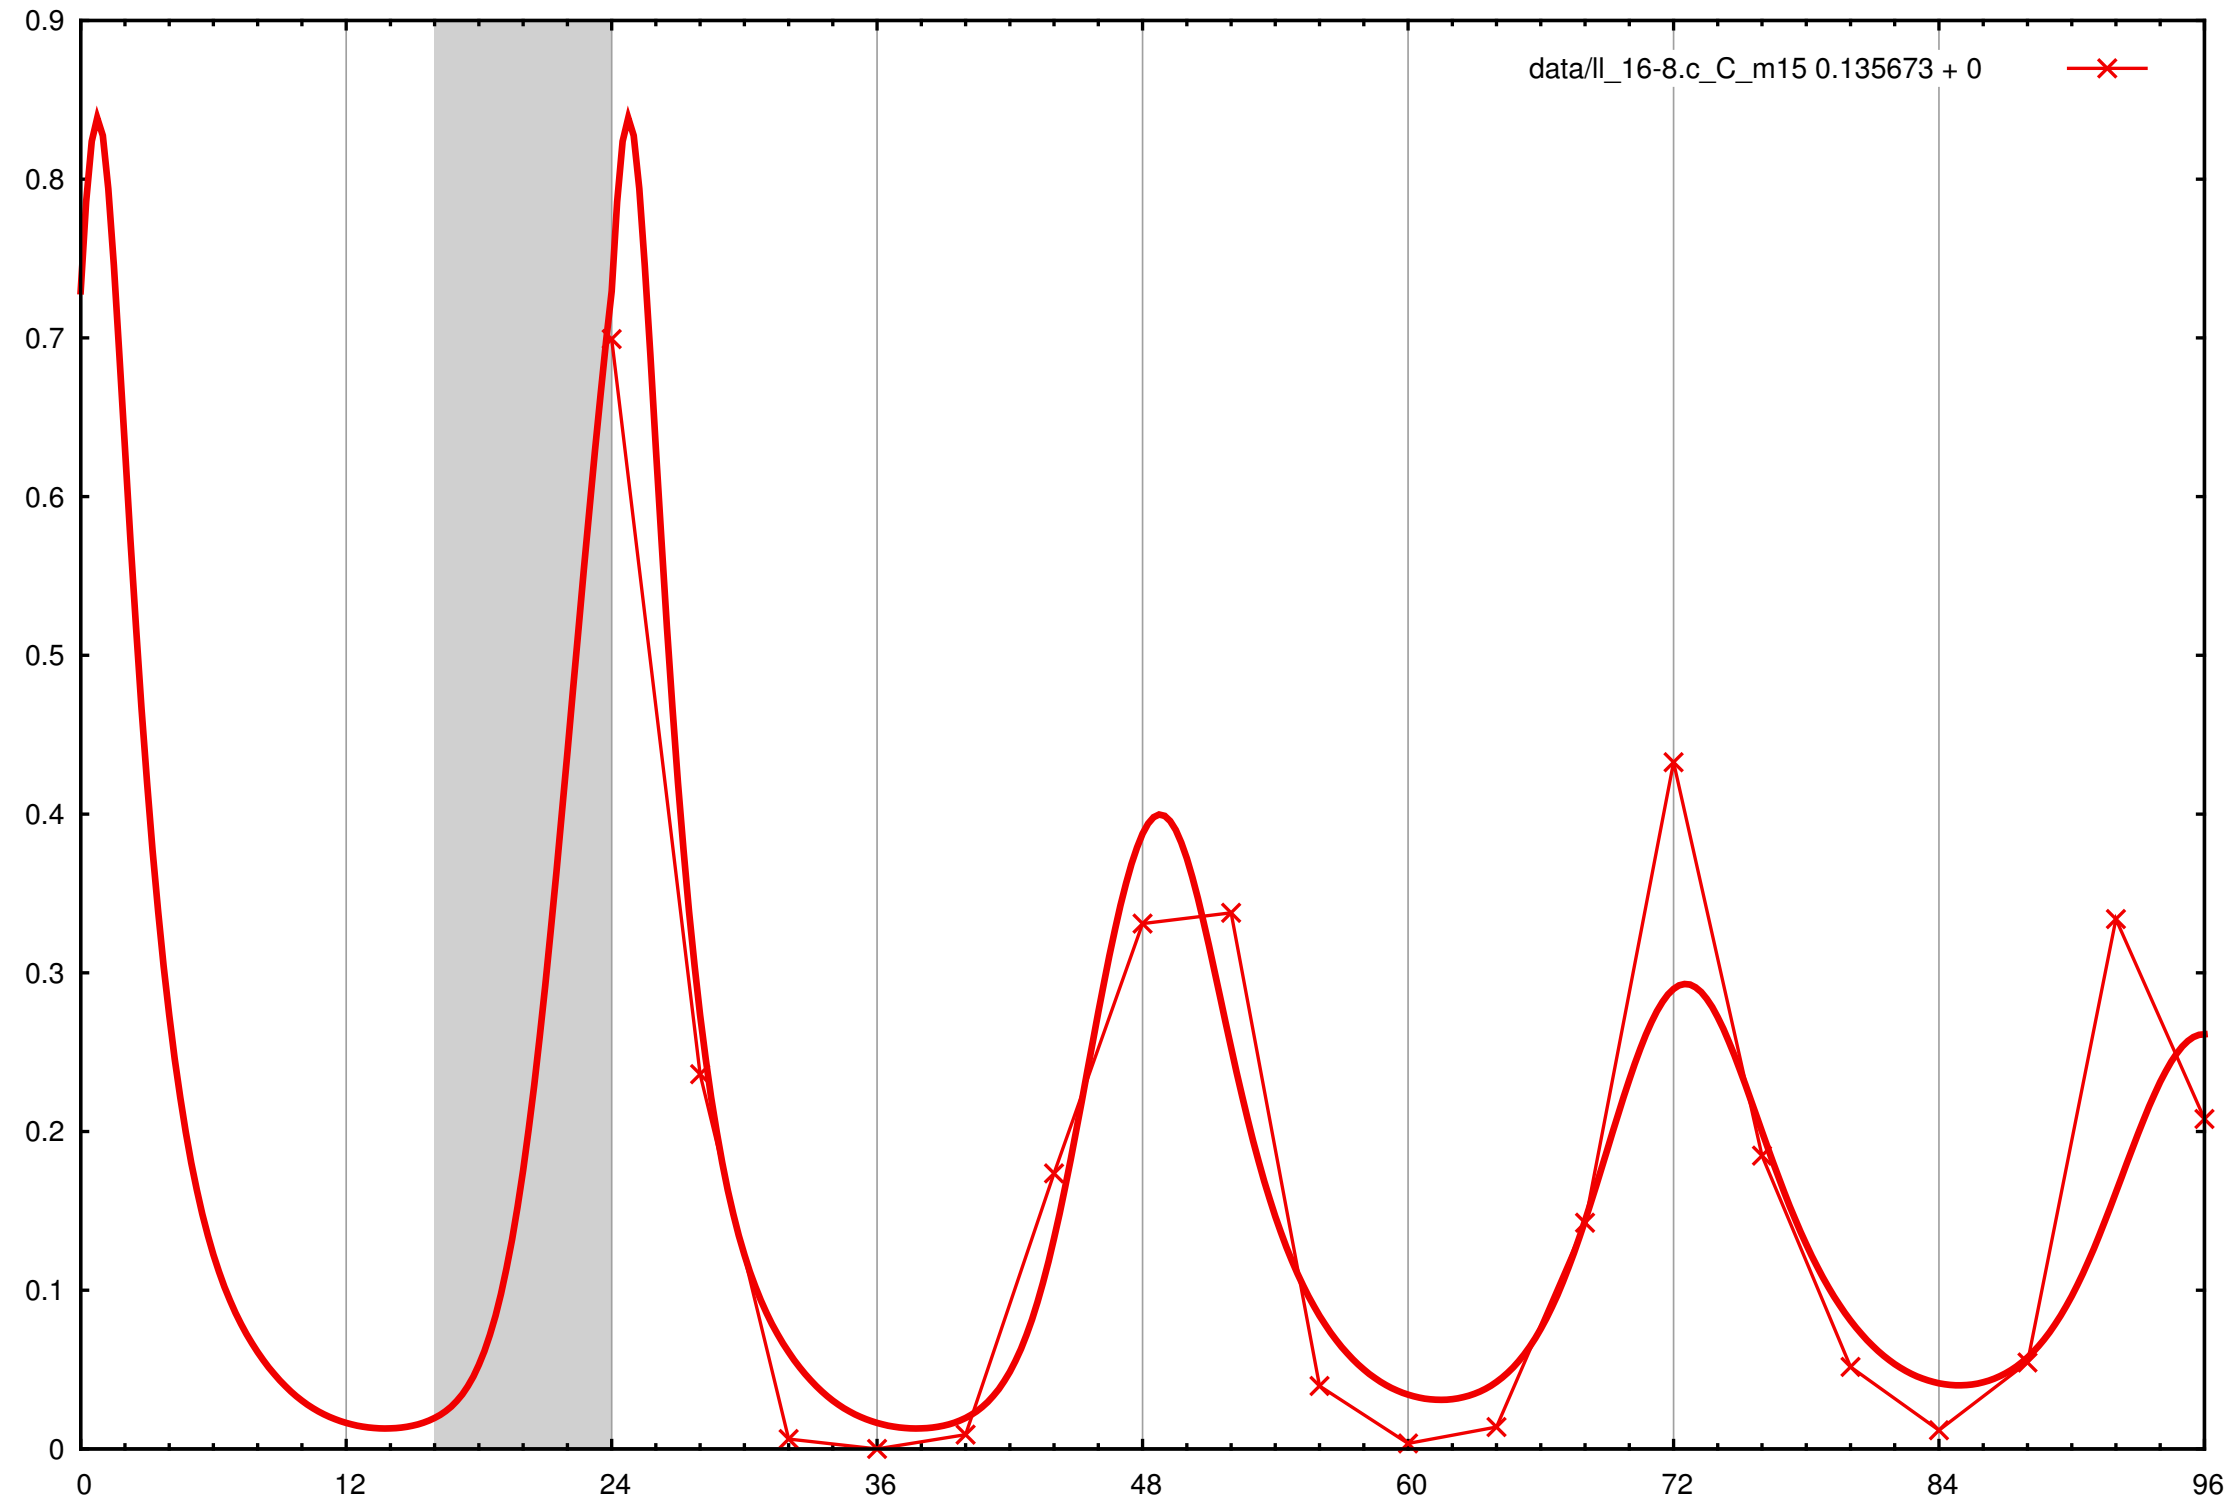

Scale group 271, scost 0

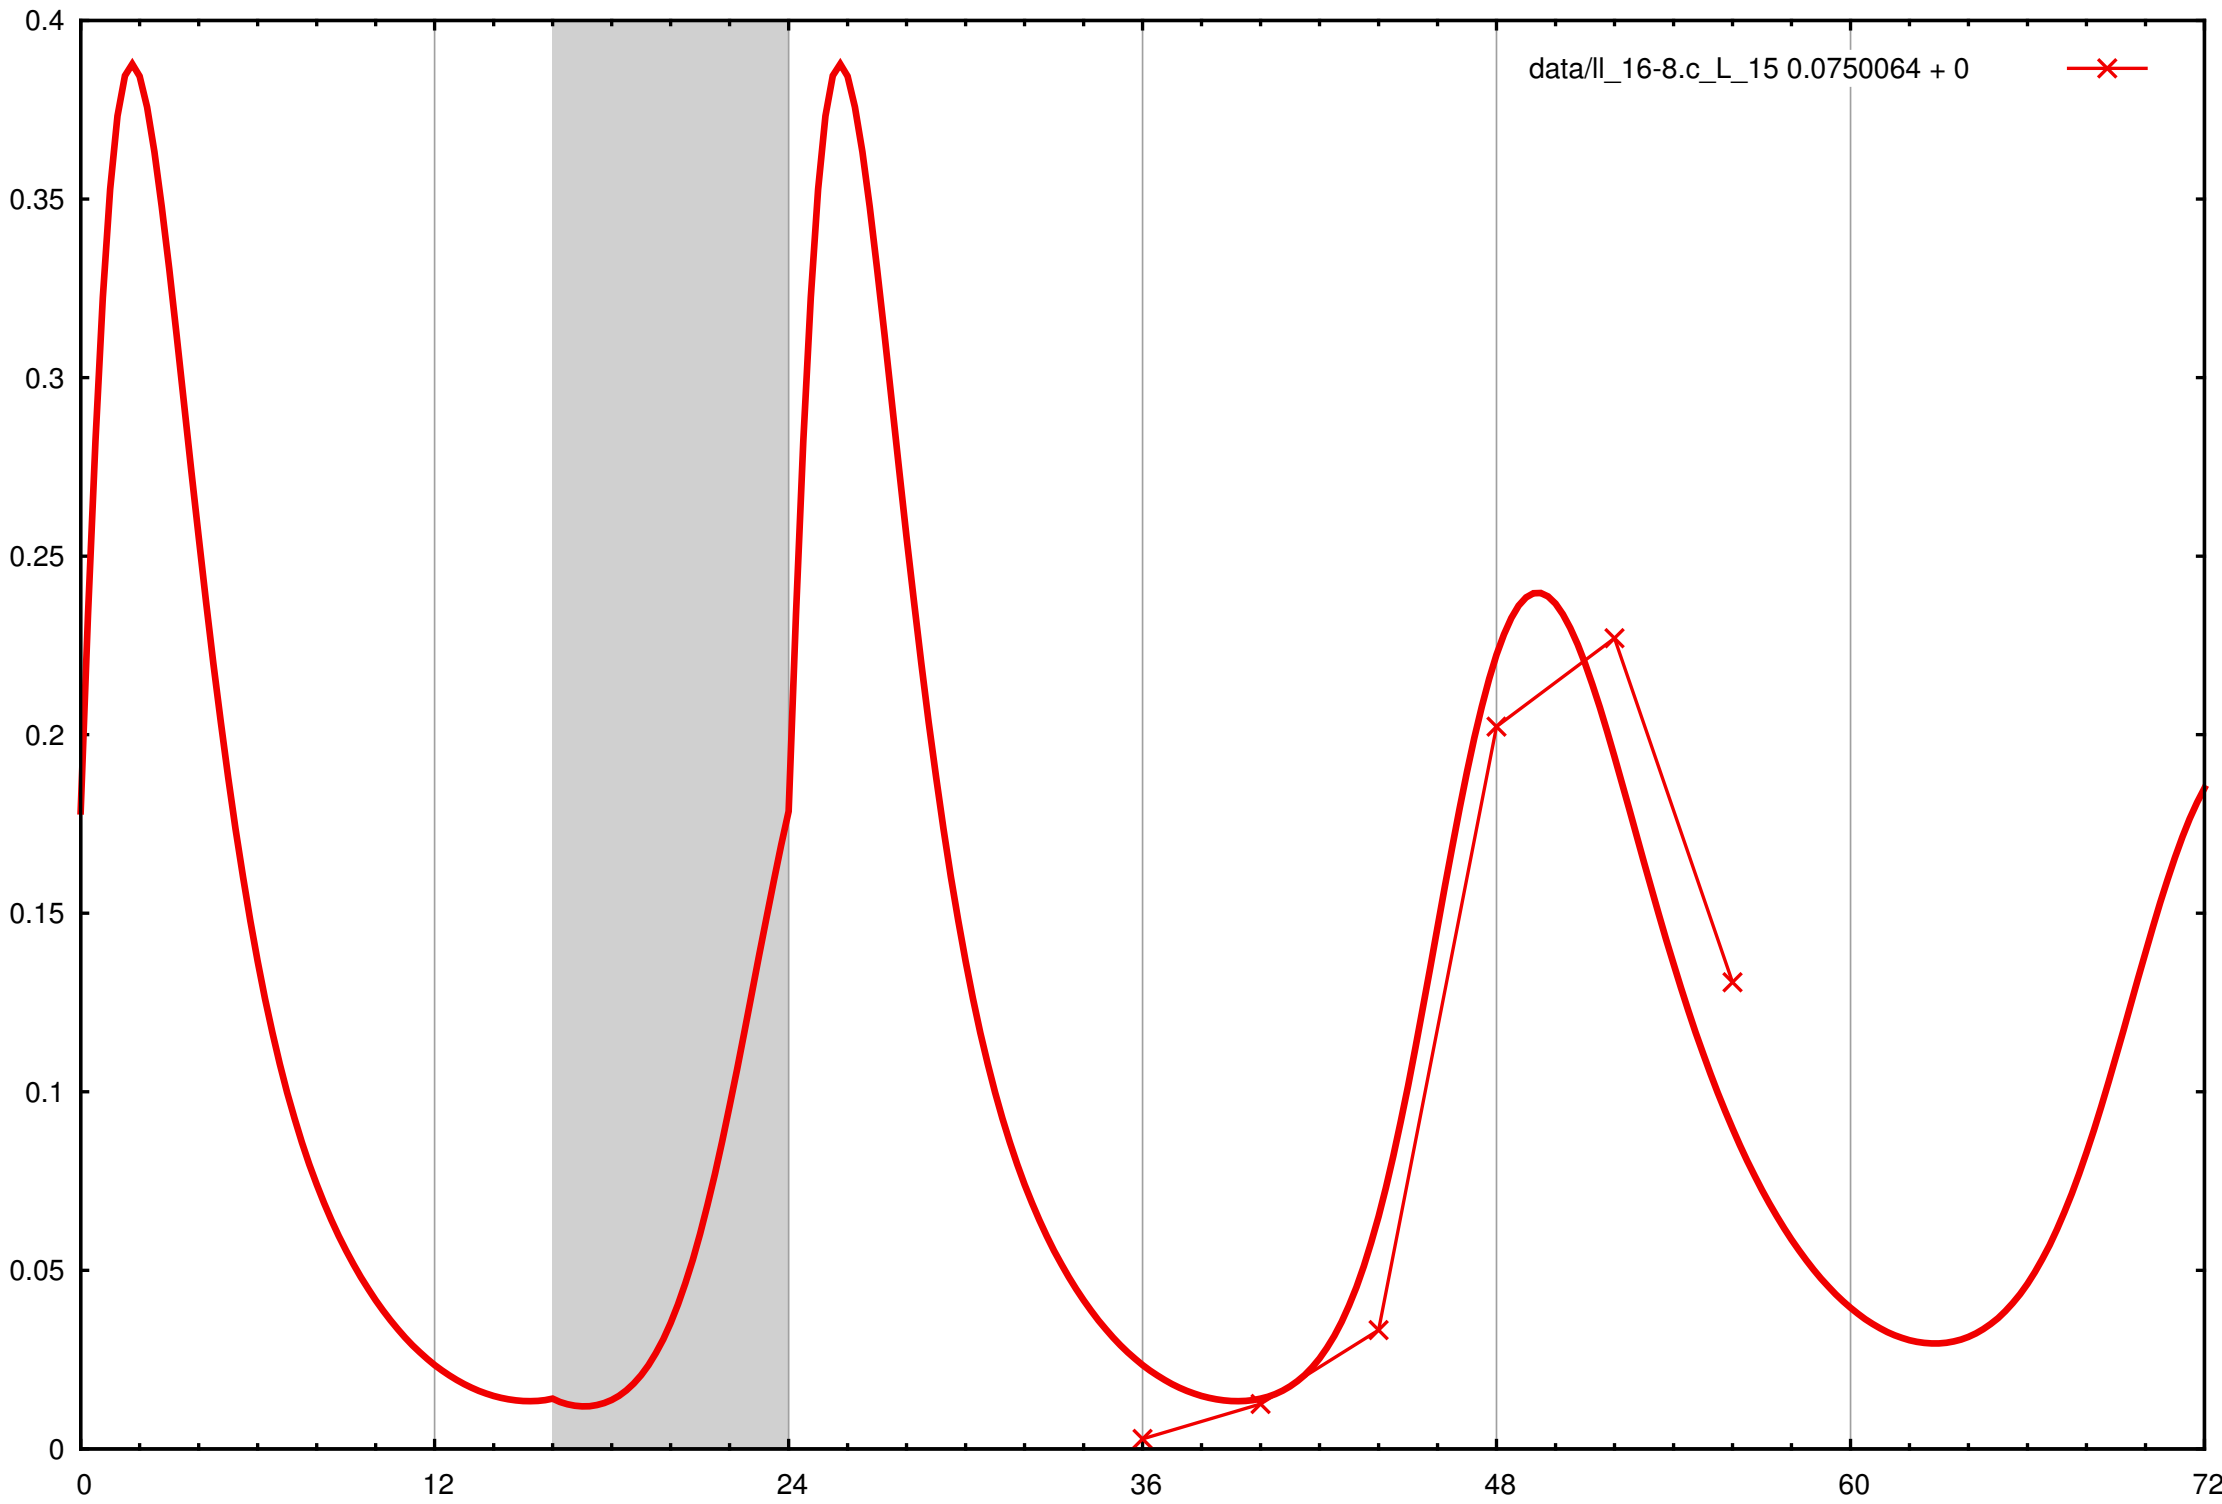

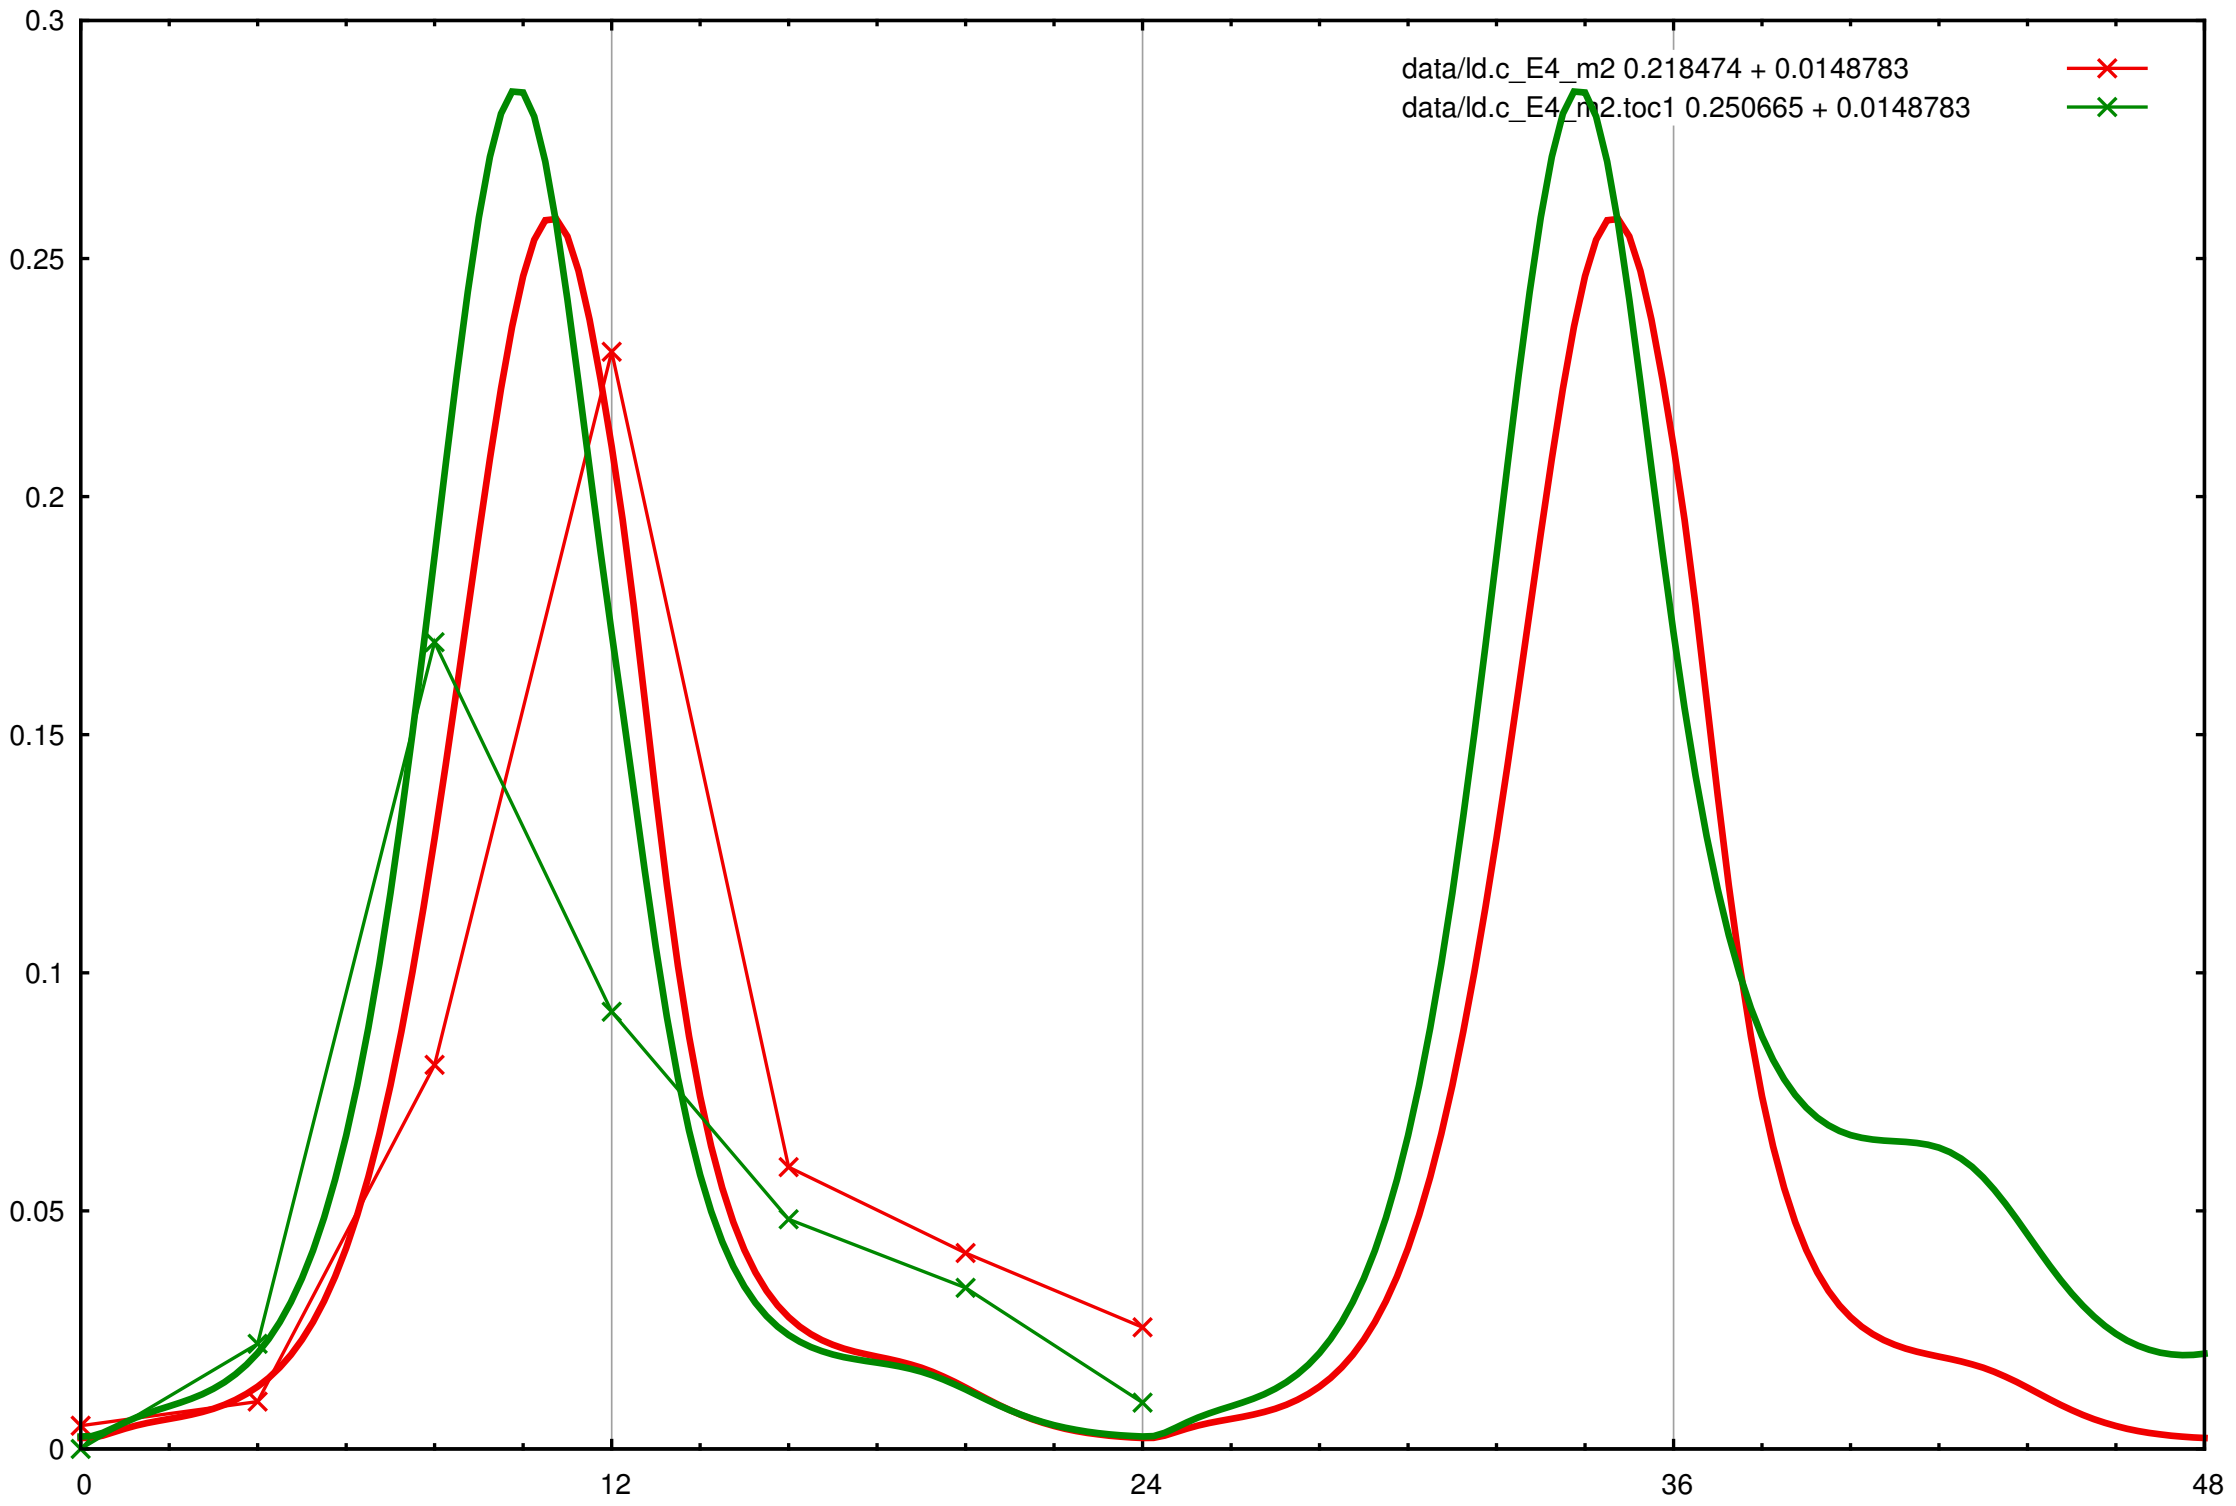



Scale group 273, scost 1.27415

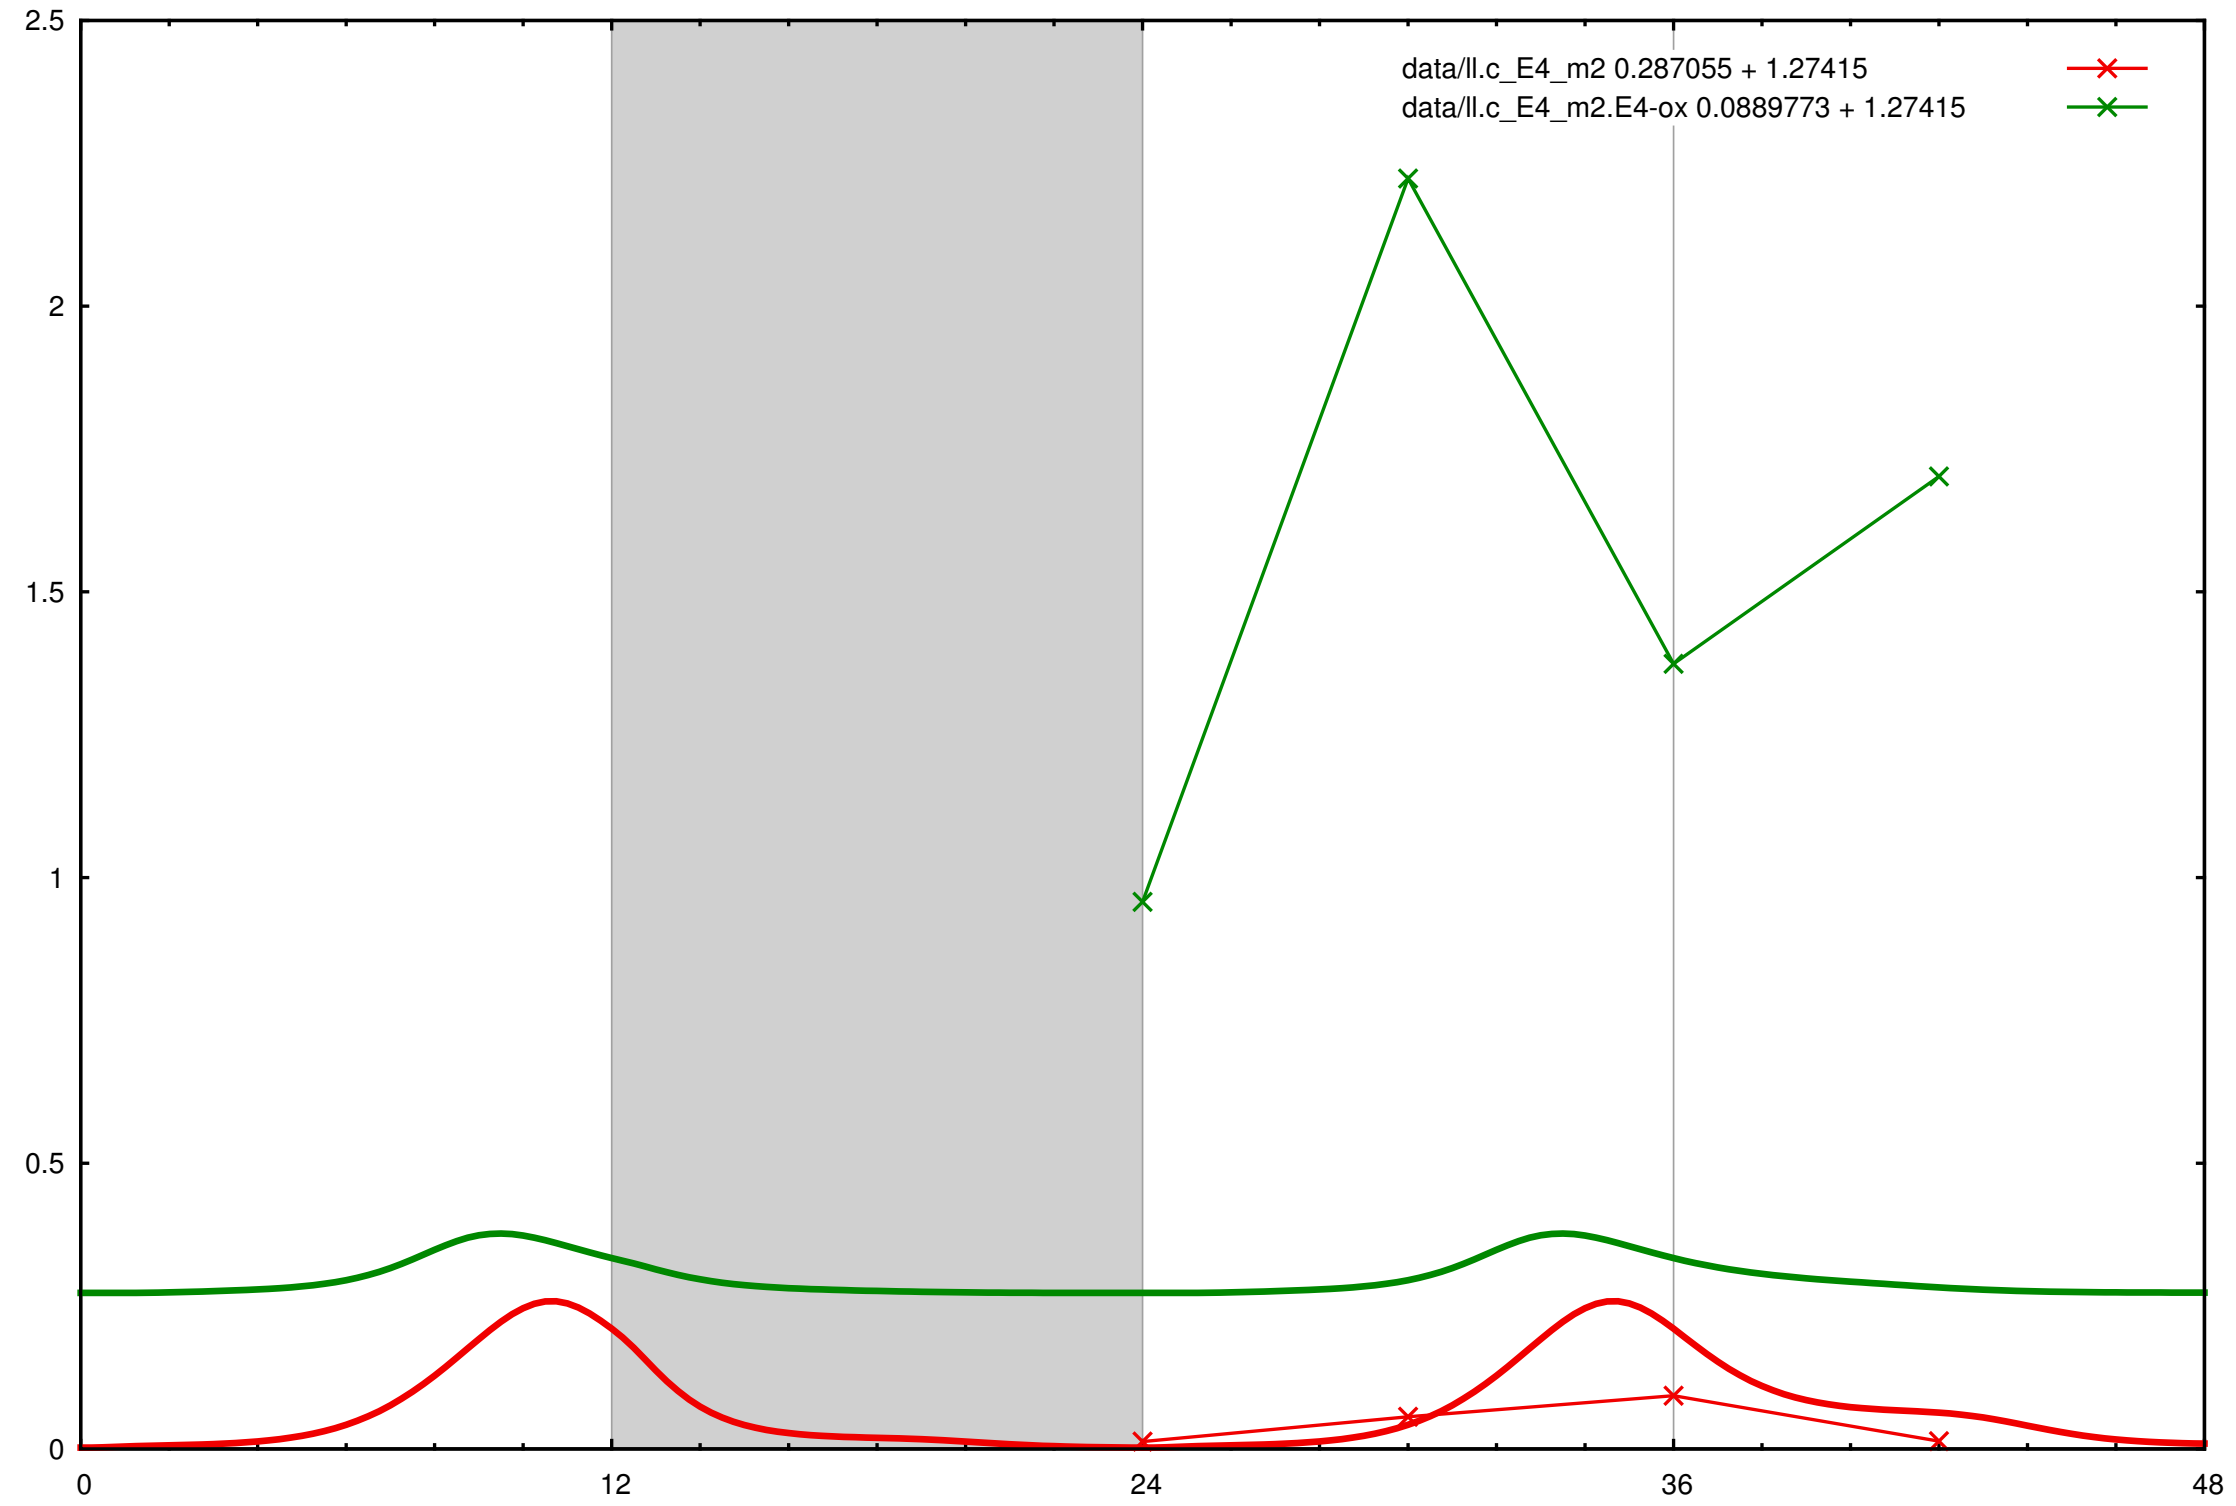

Scale group 274, scost 0.00450236

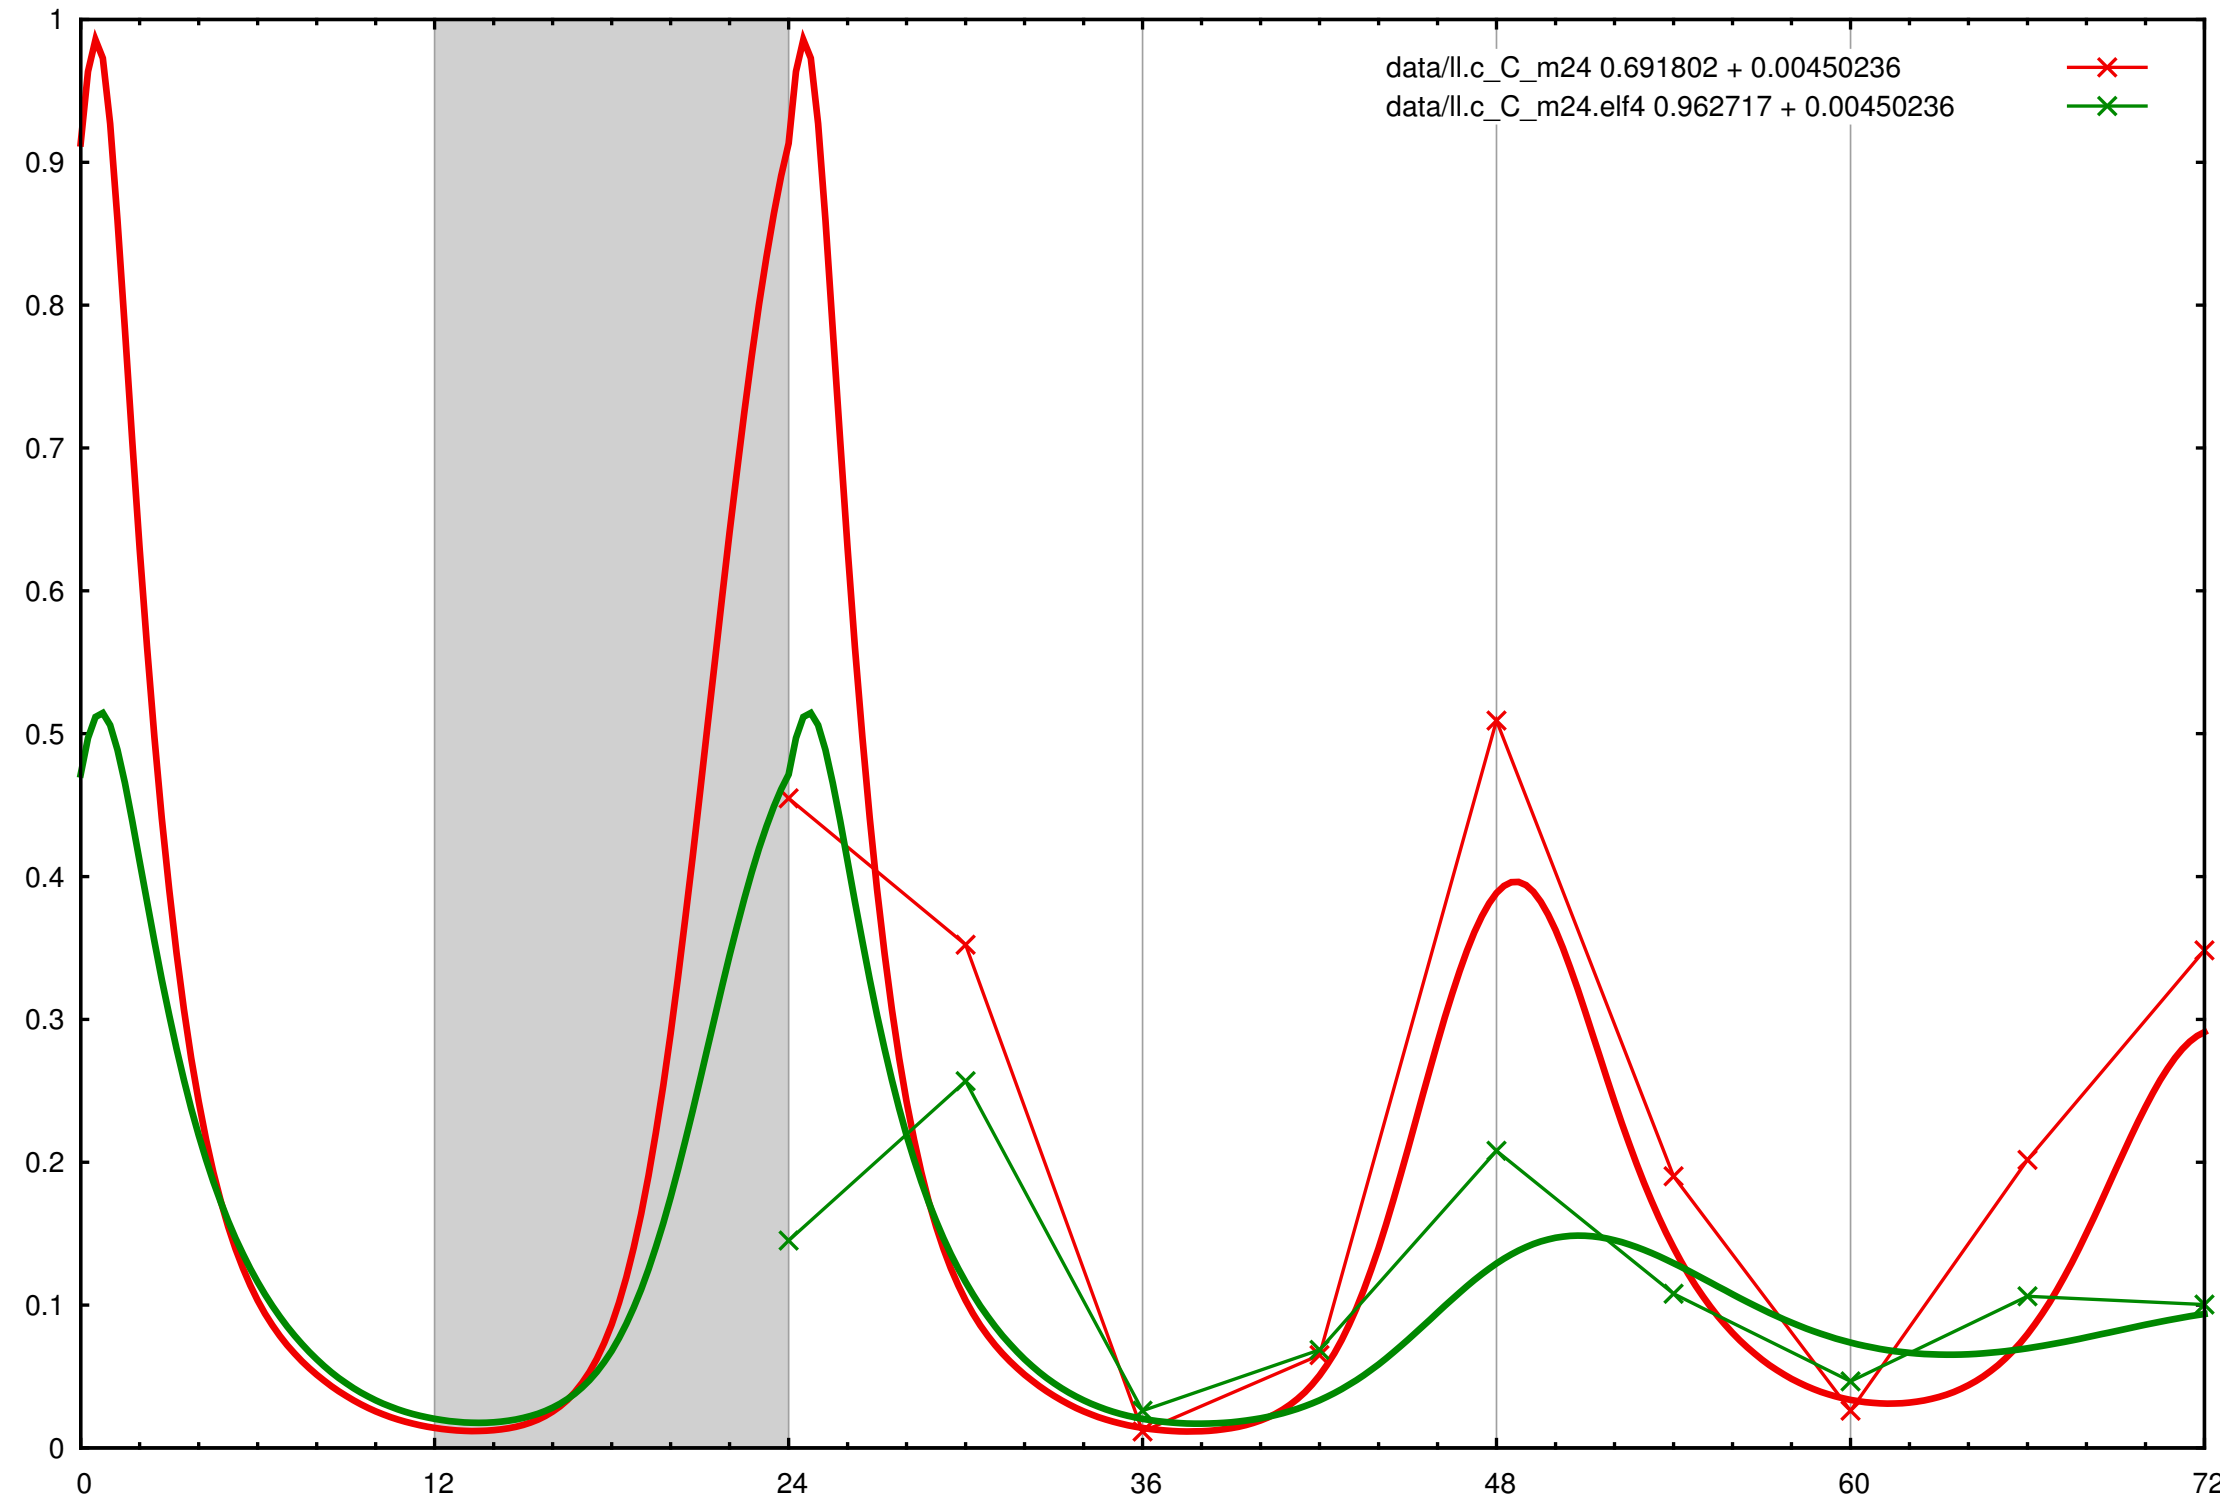

Scale group 275, scost 0.248921

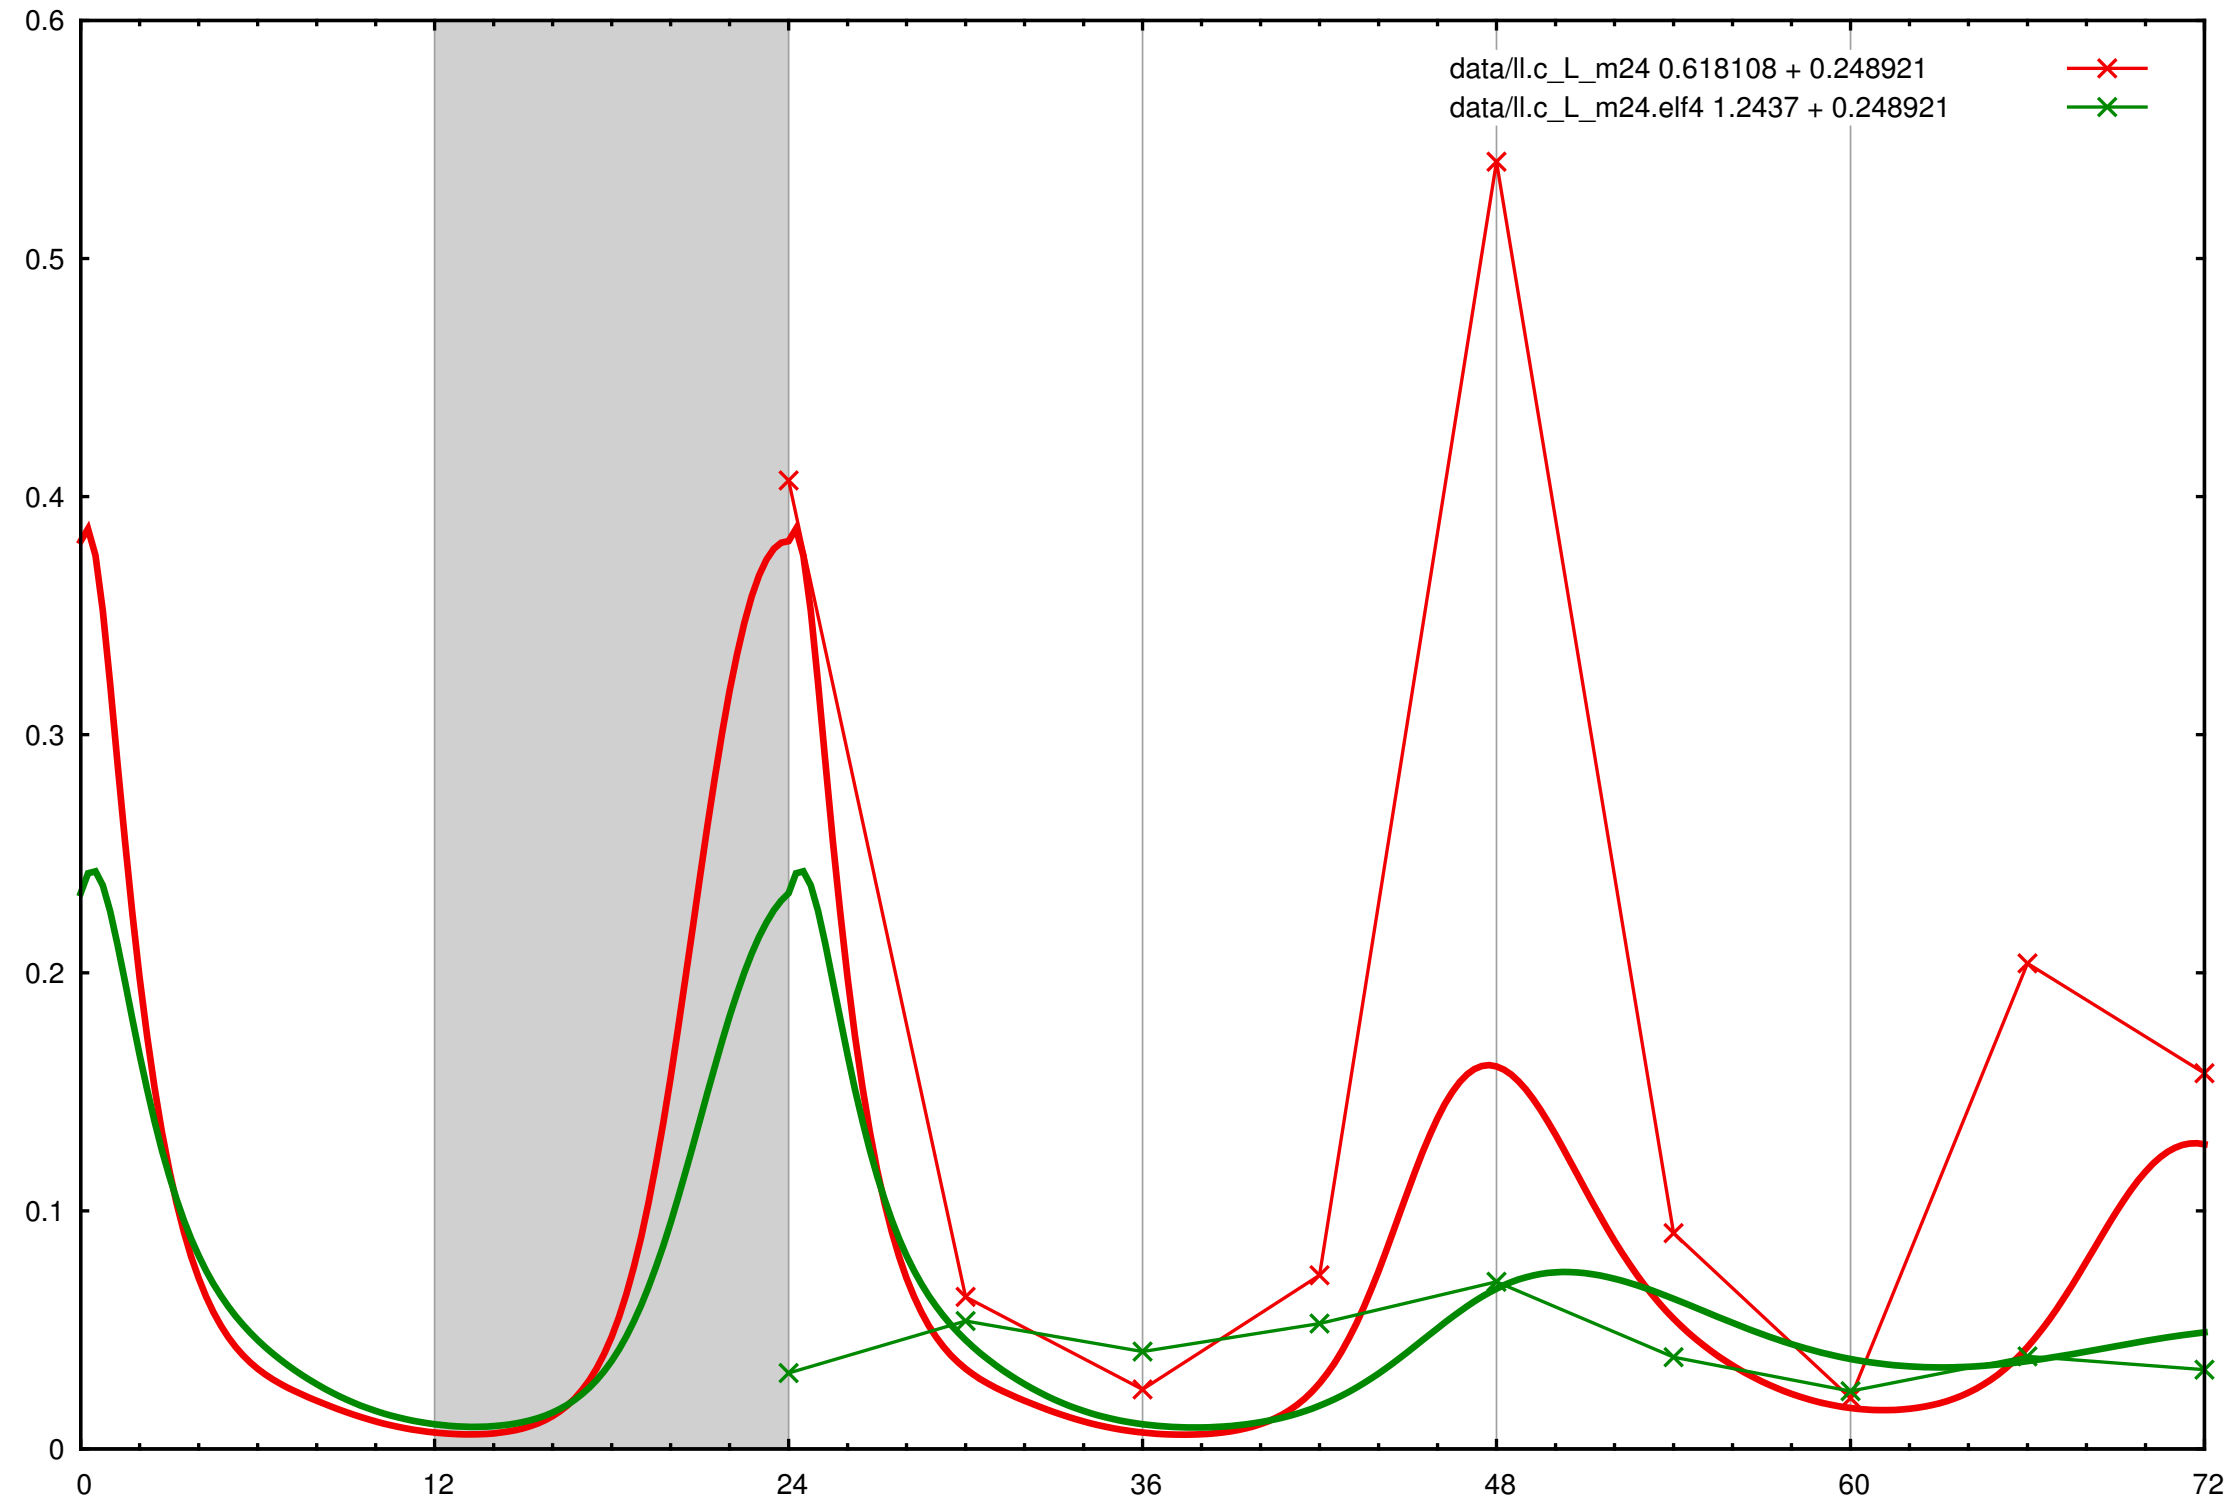

Scale group 276, scost 0.0181457

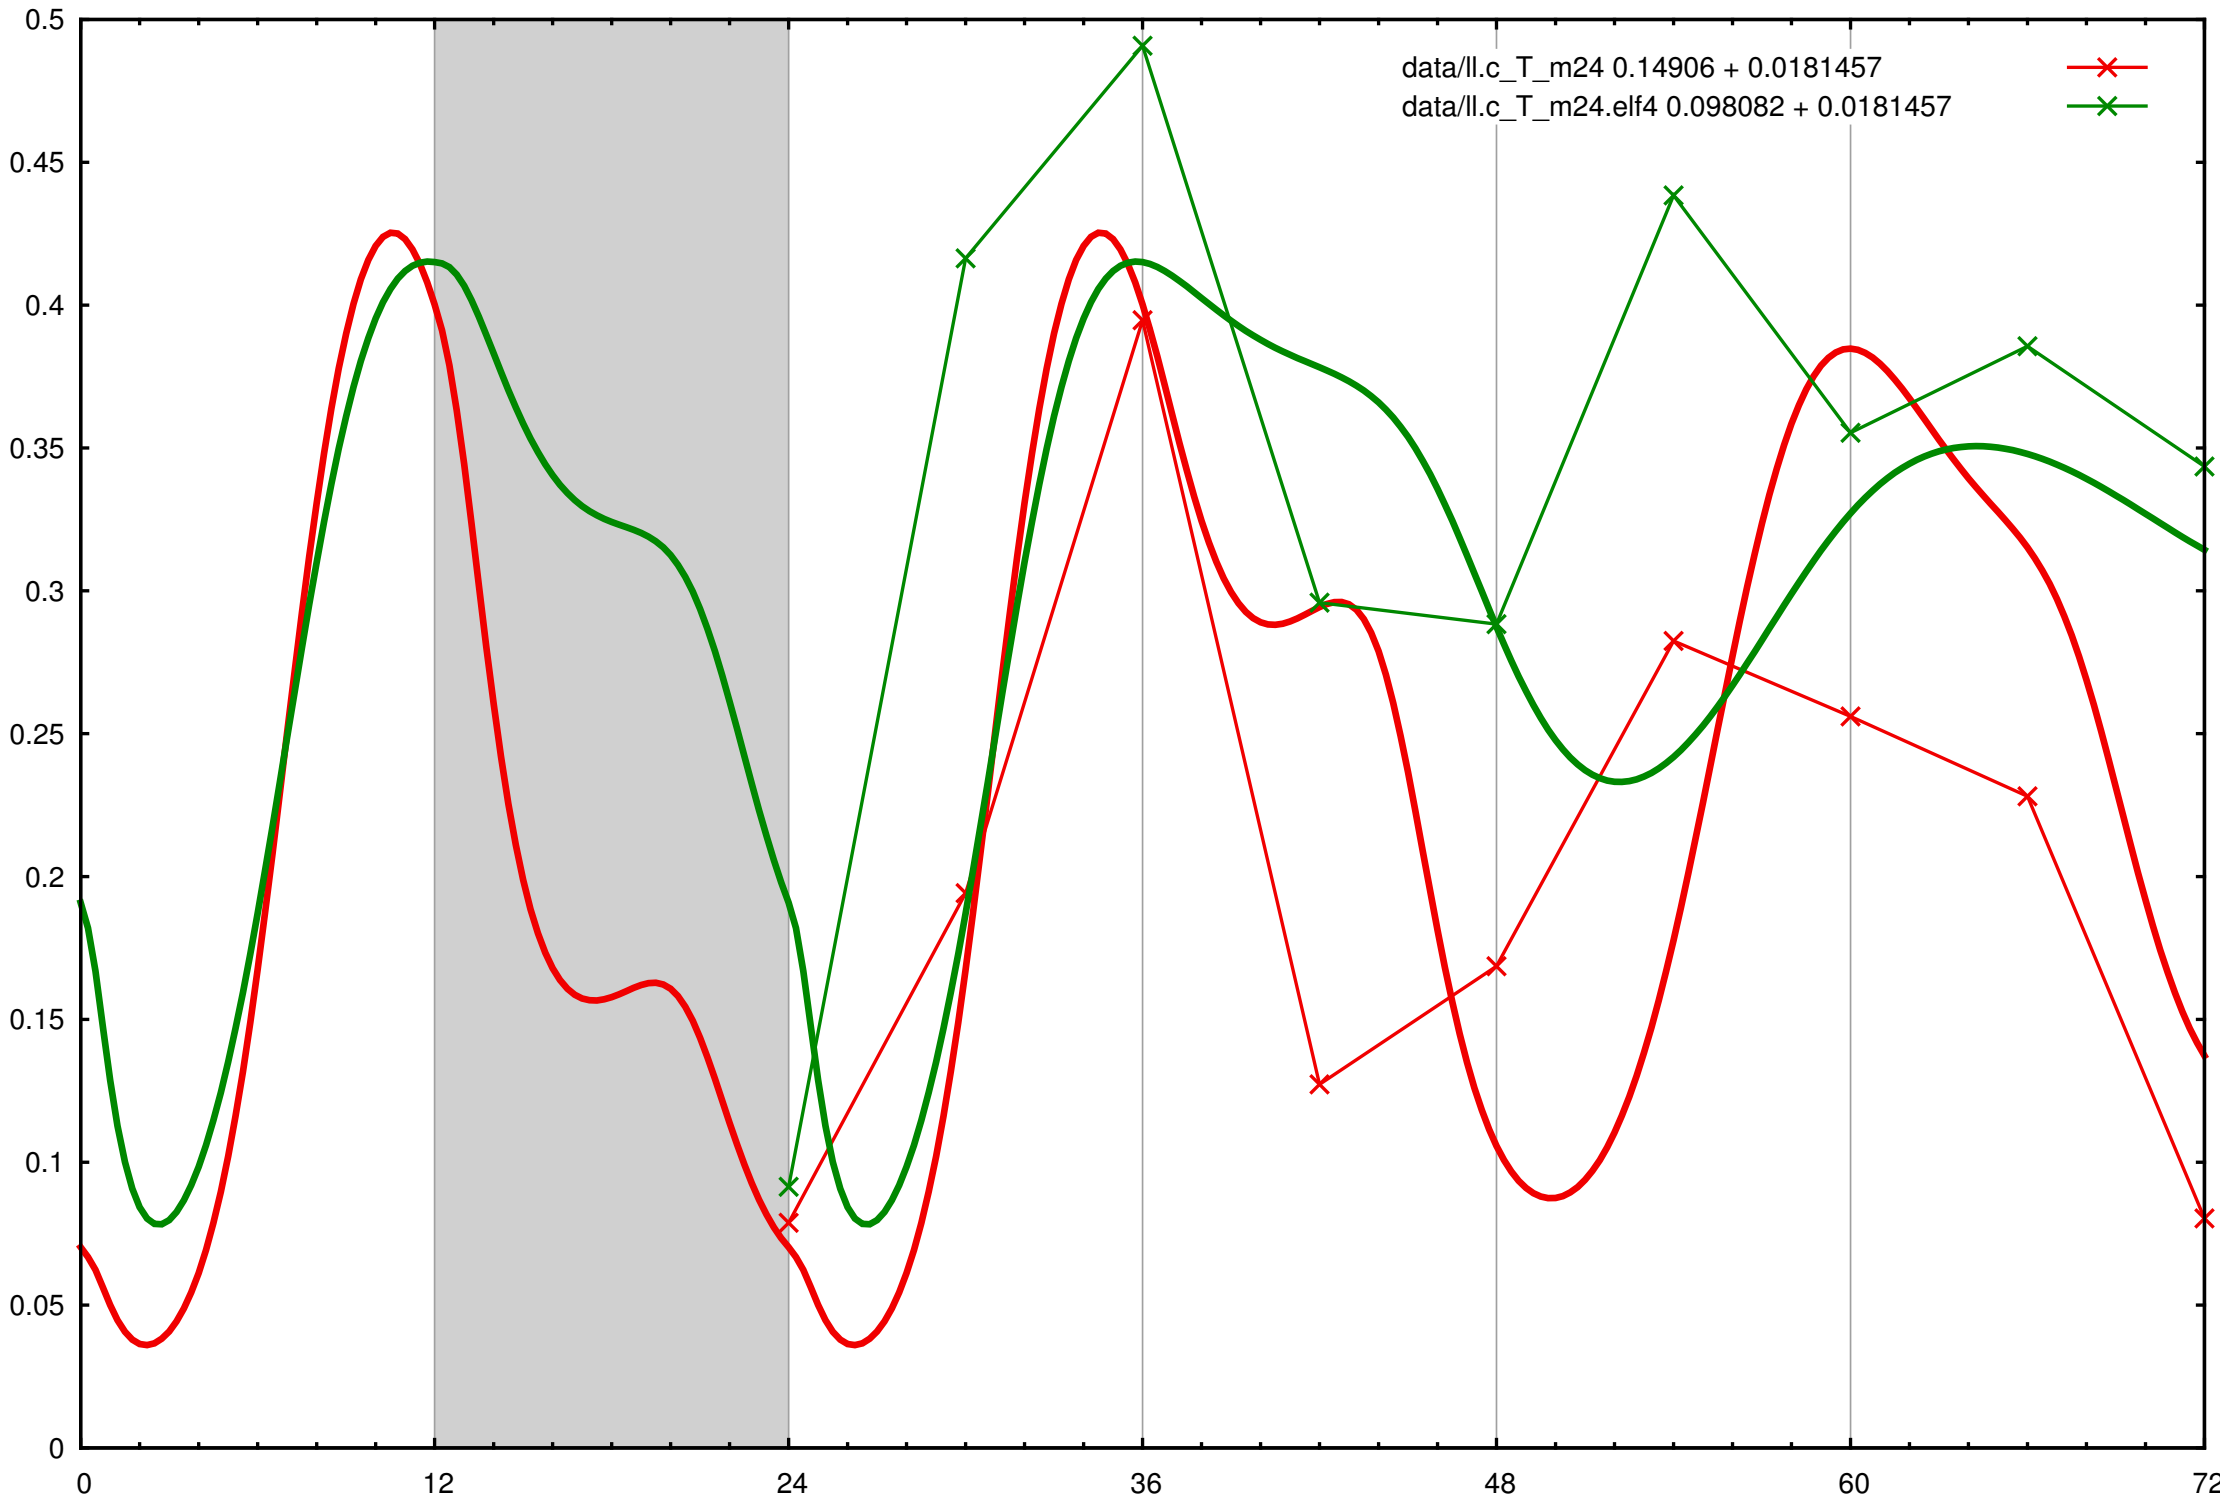

Scale group 277, scost 0.428081

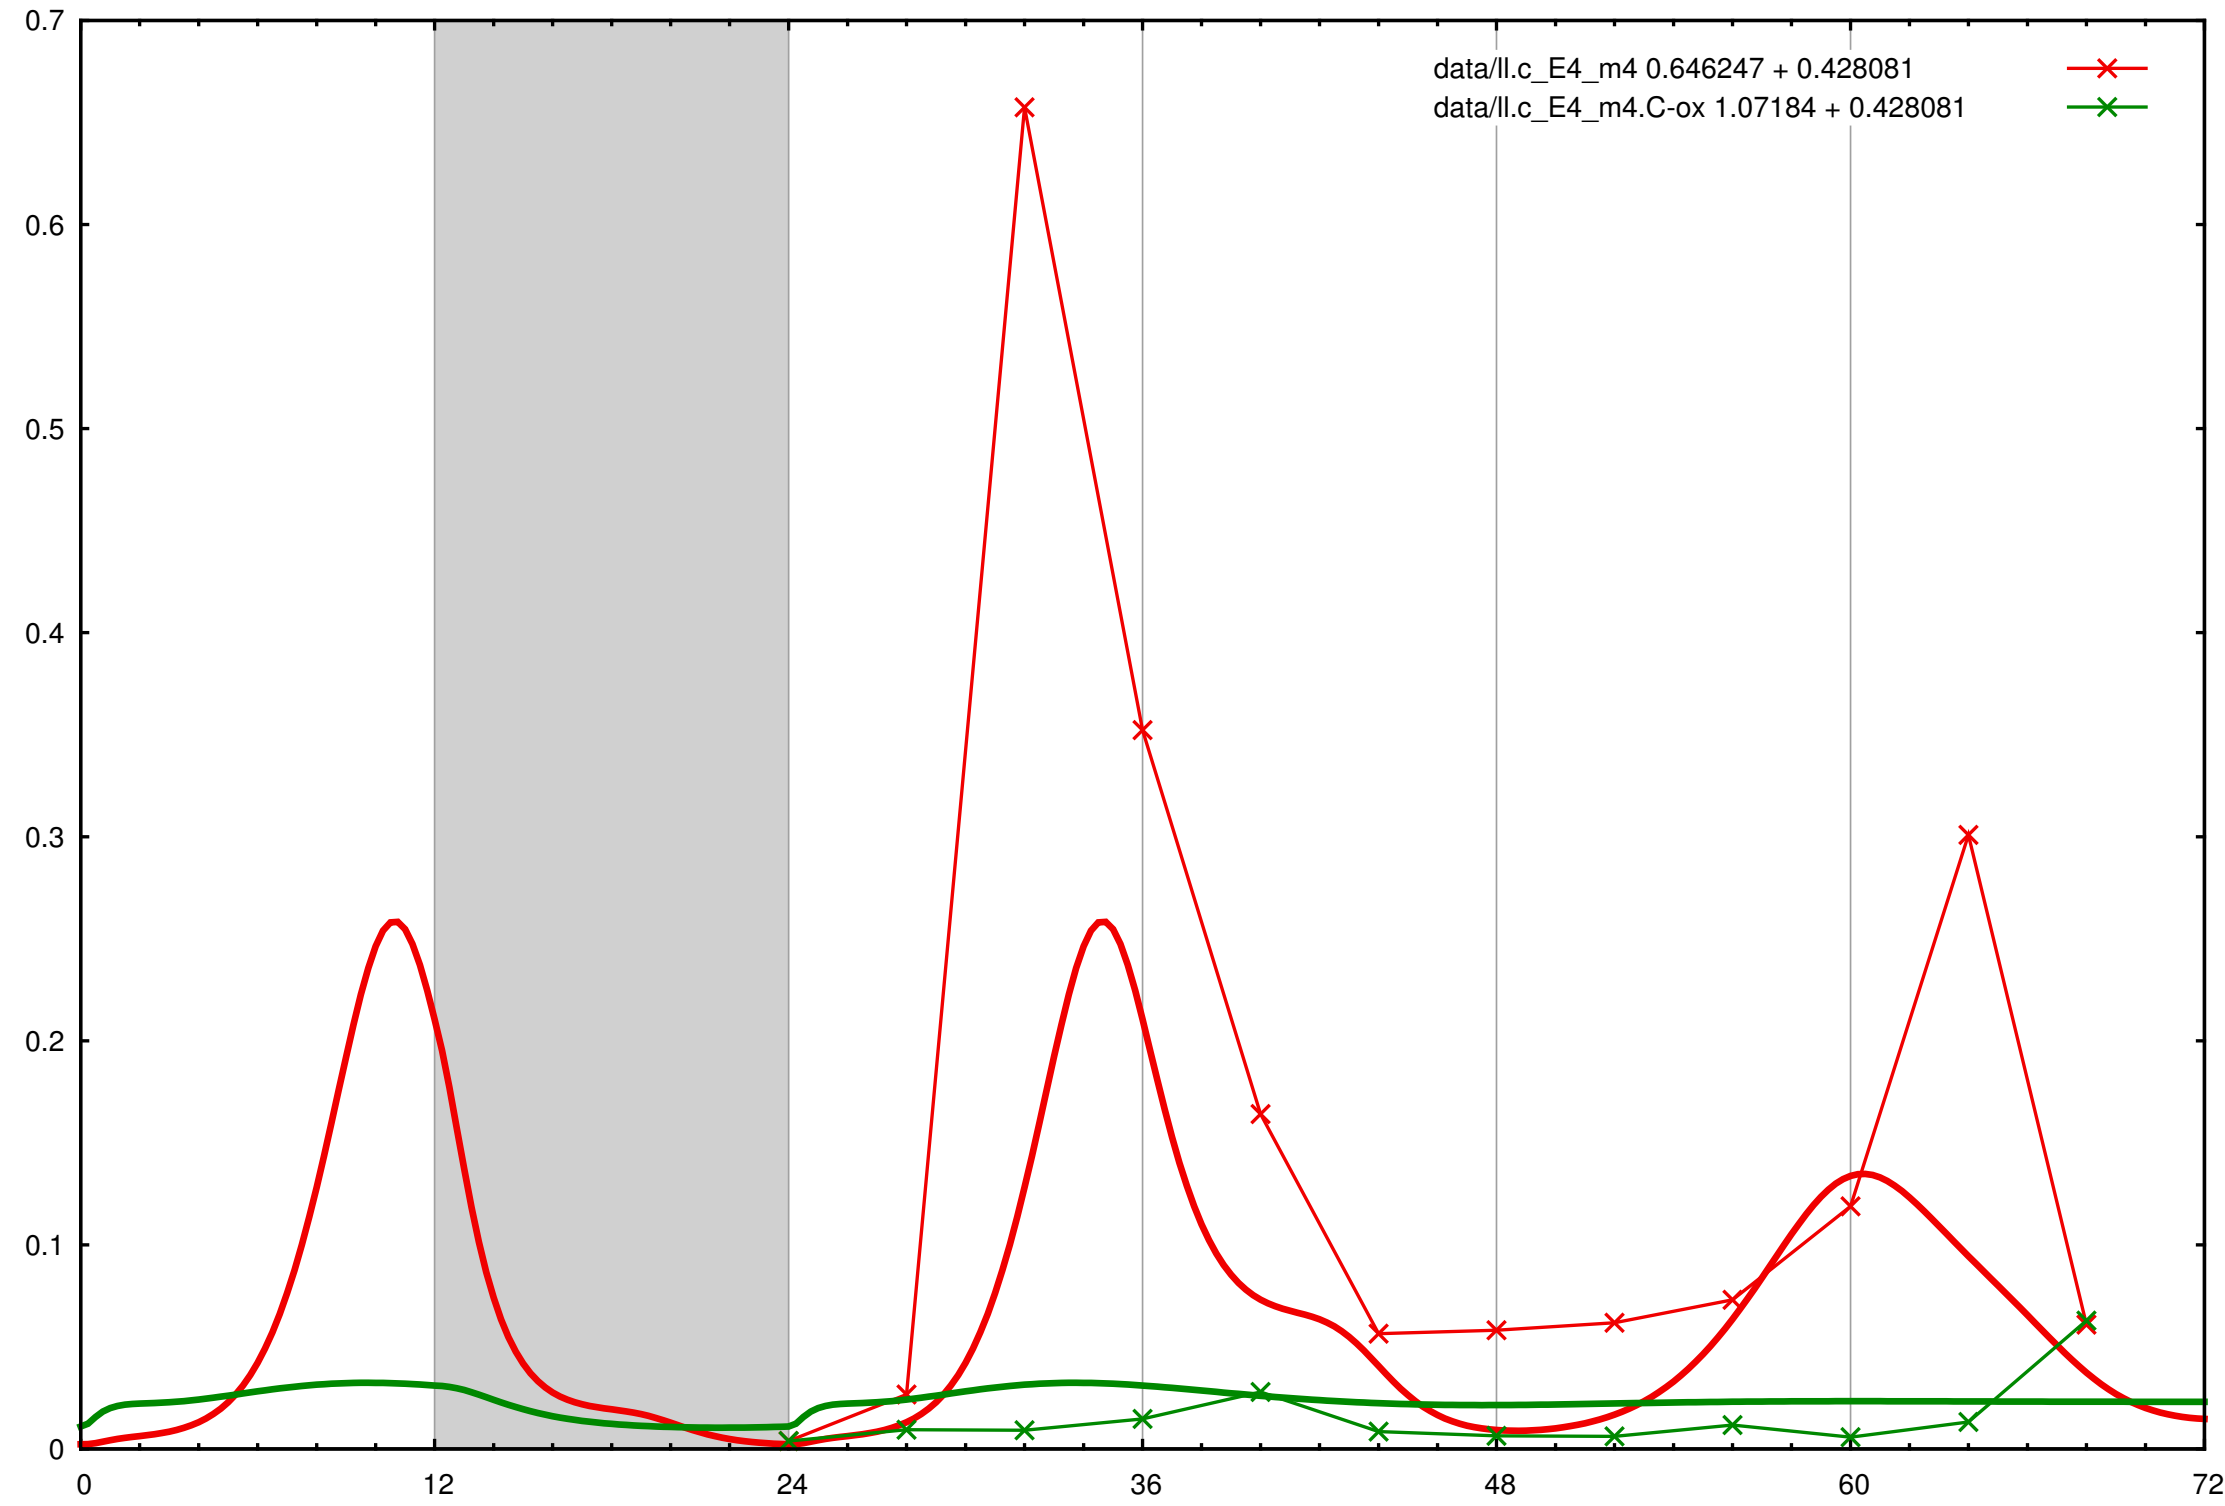

Scale group 278, scost 0.149069

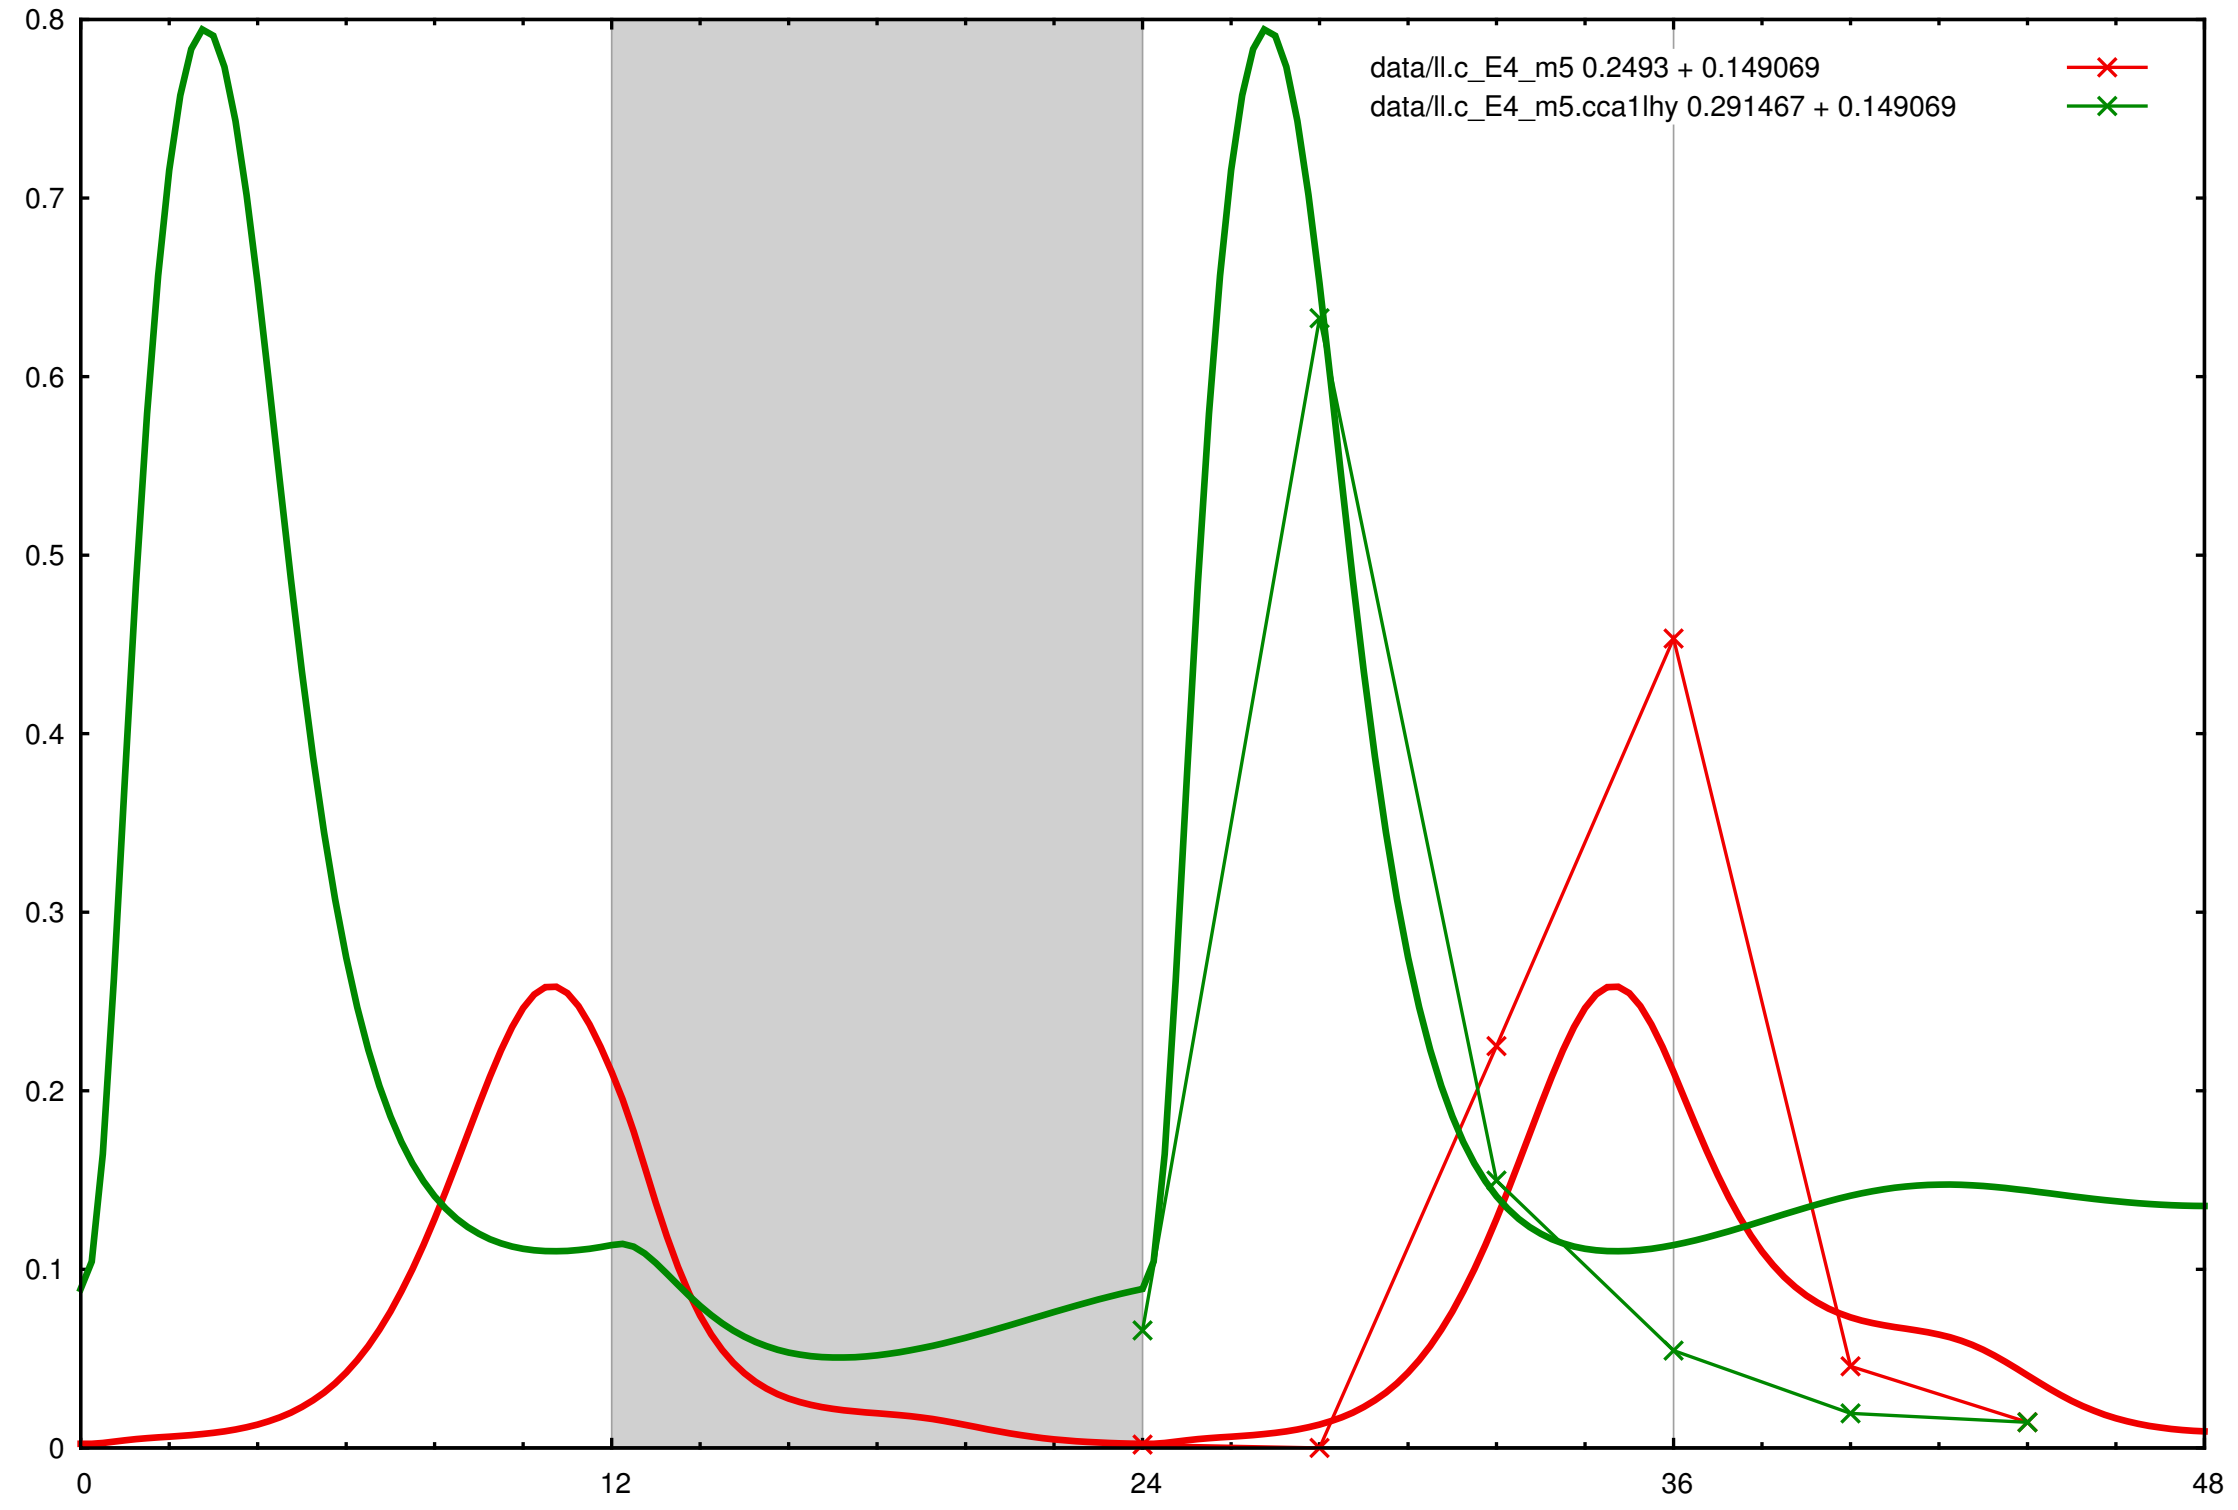

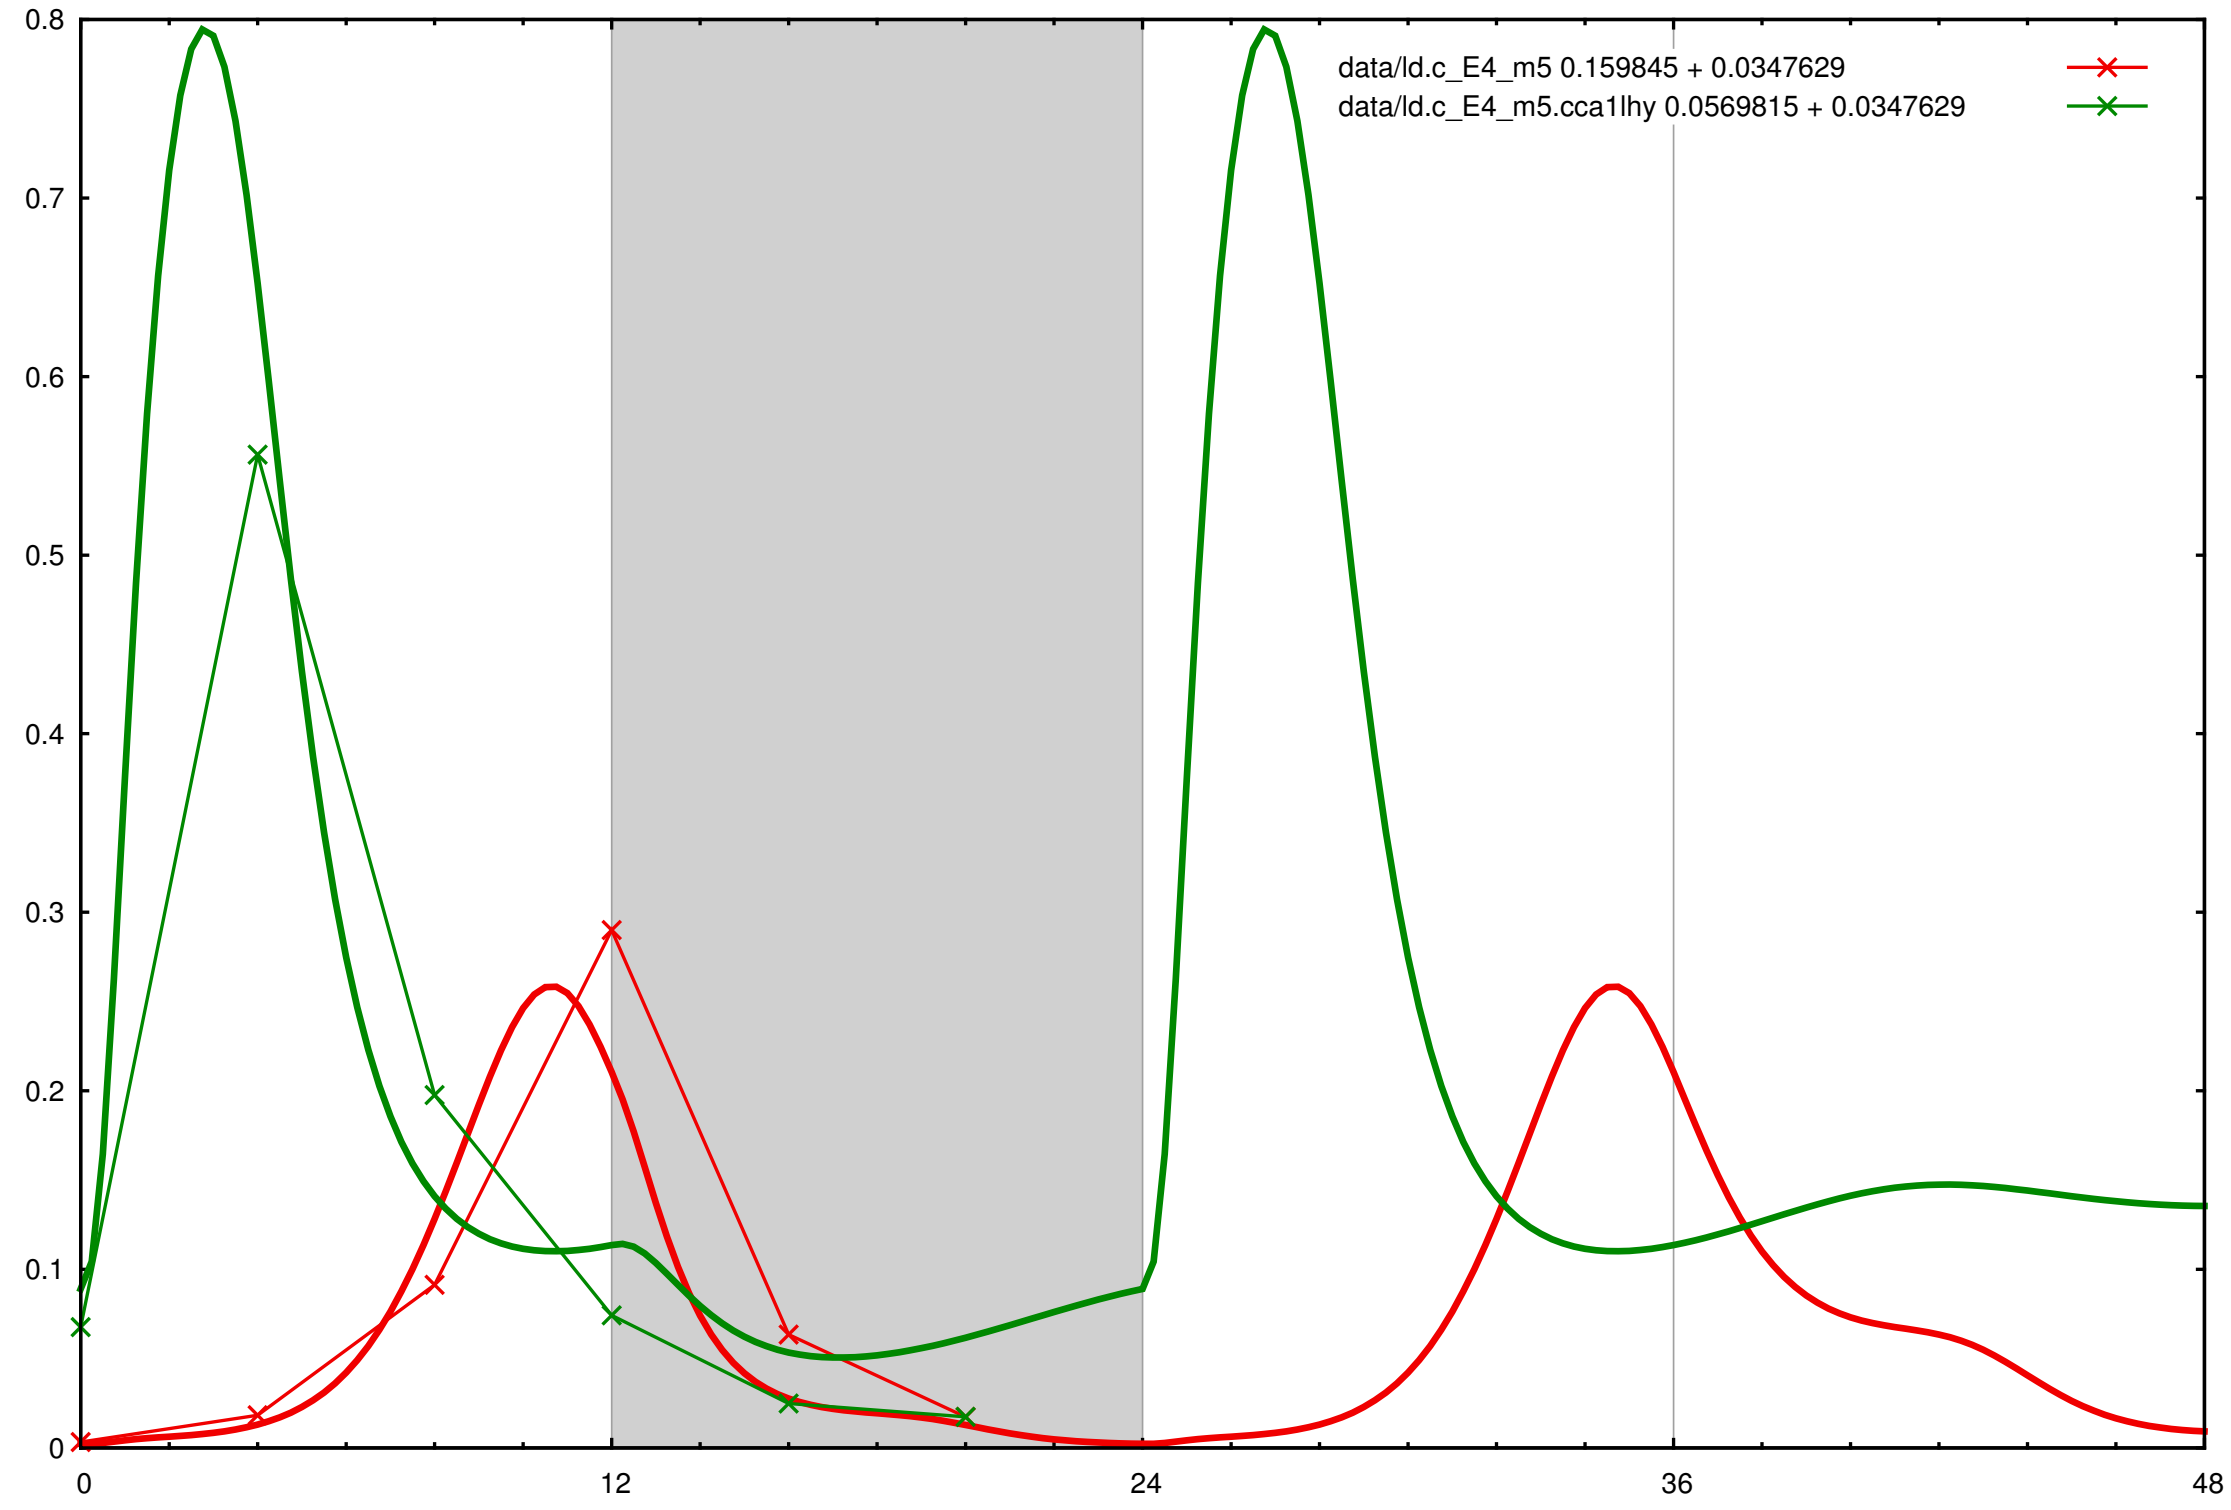

Scale group 280, scost 0

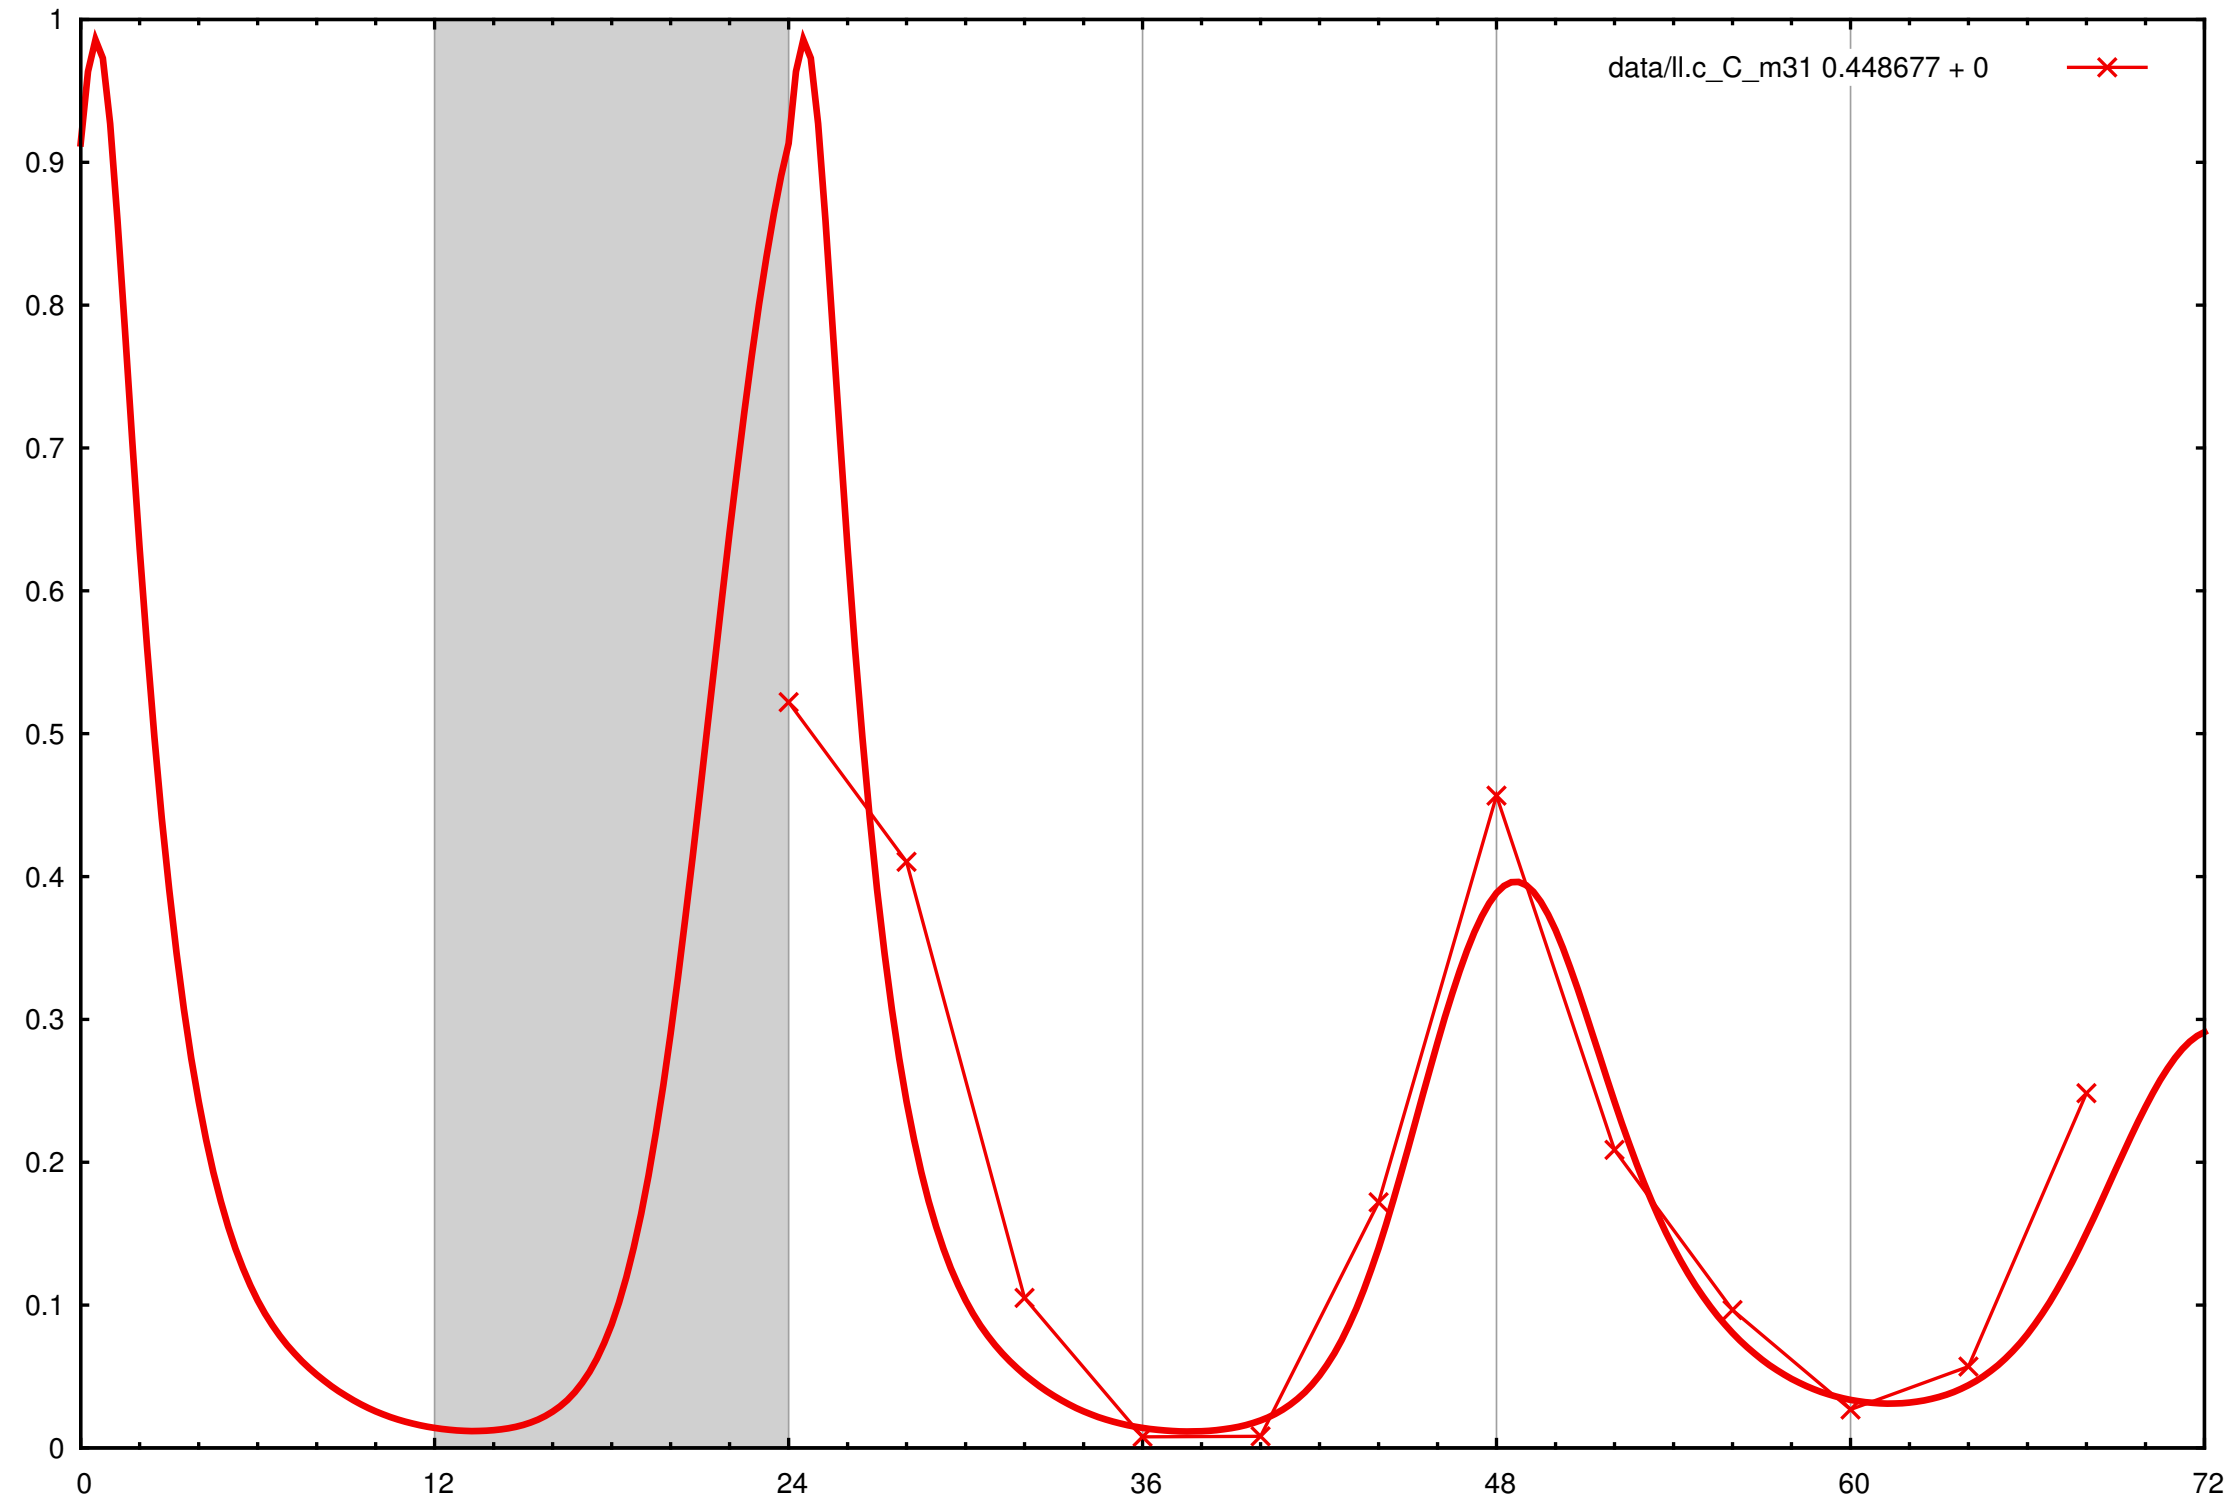



Scale group 281, scost 0

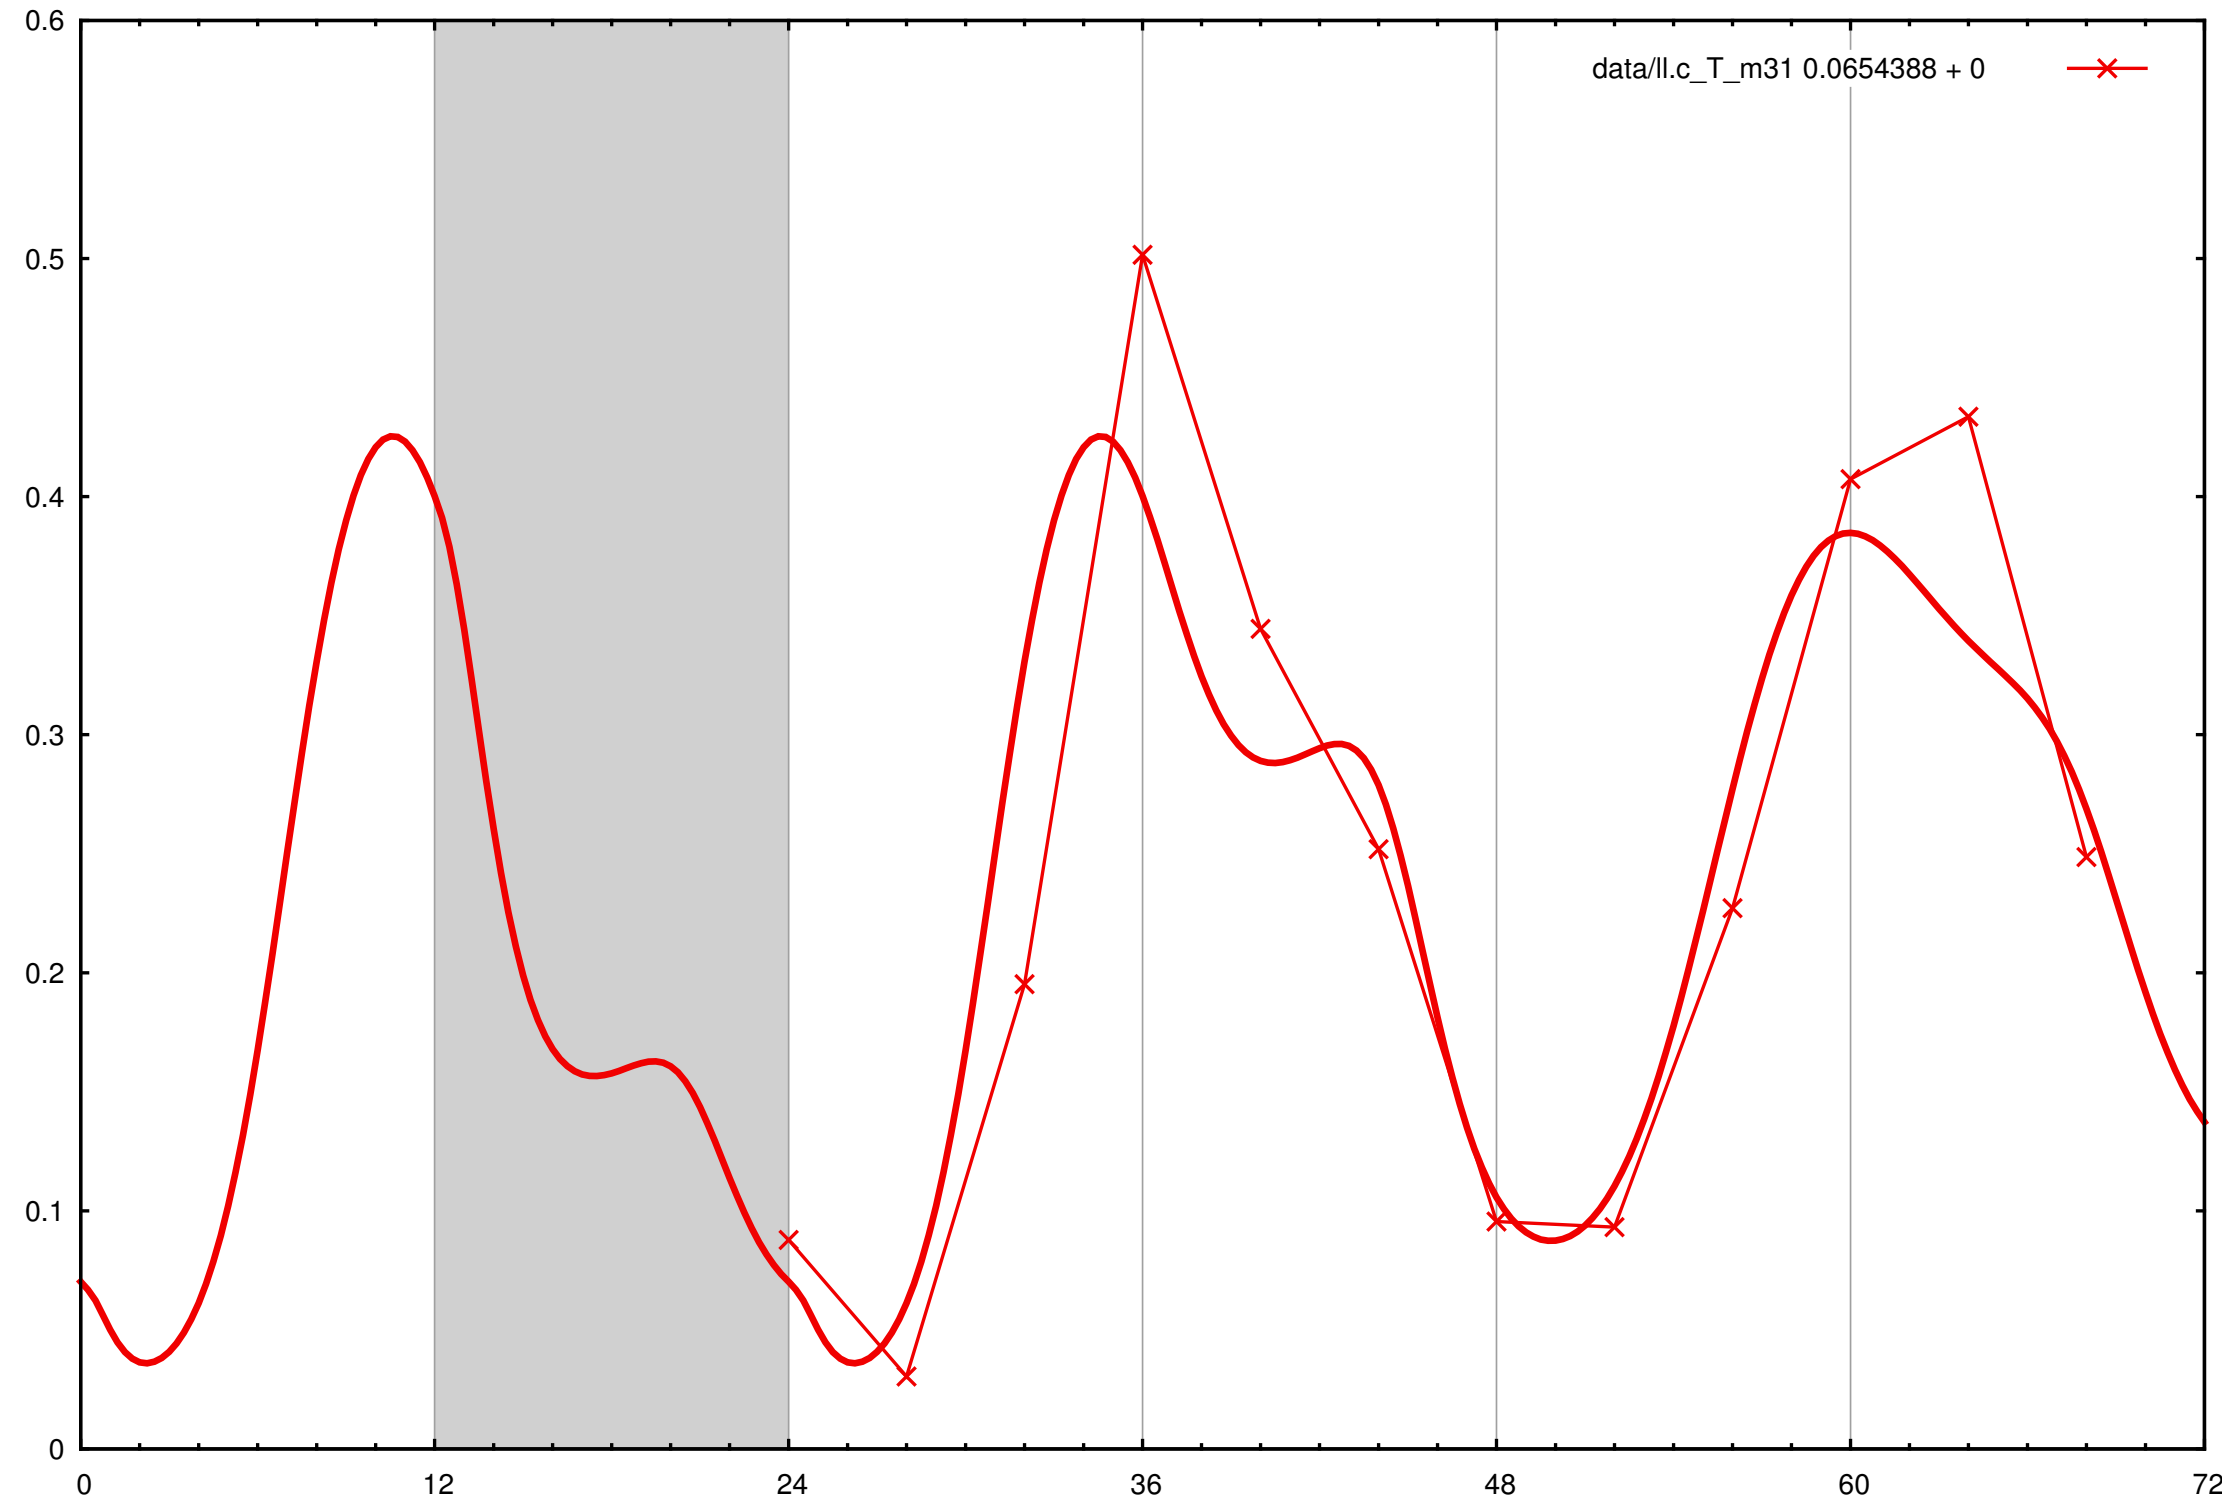

data//l.c\_T\_m31 0.0654388 + 0 x

Scale group 282, scost 0

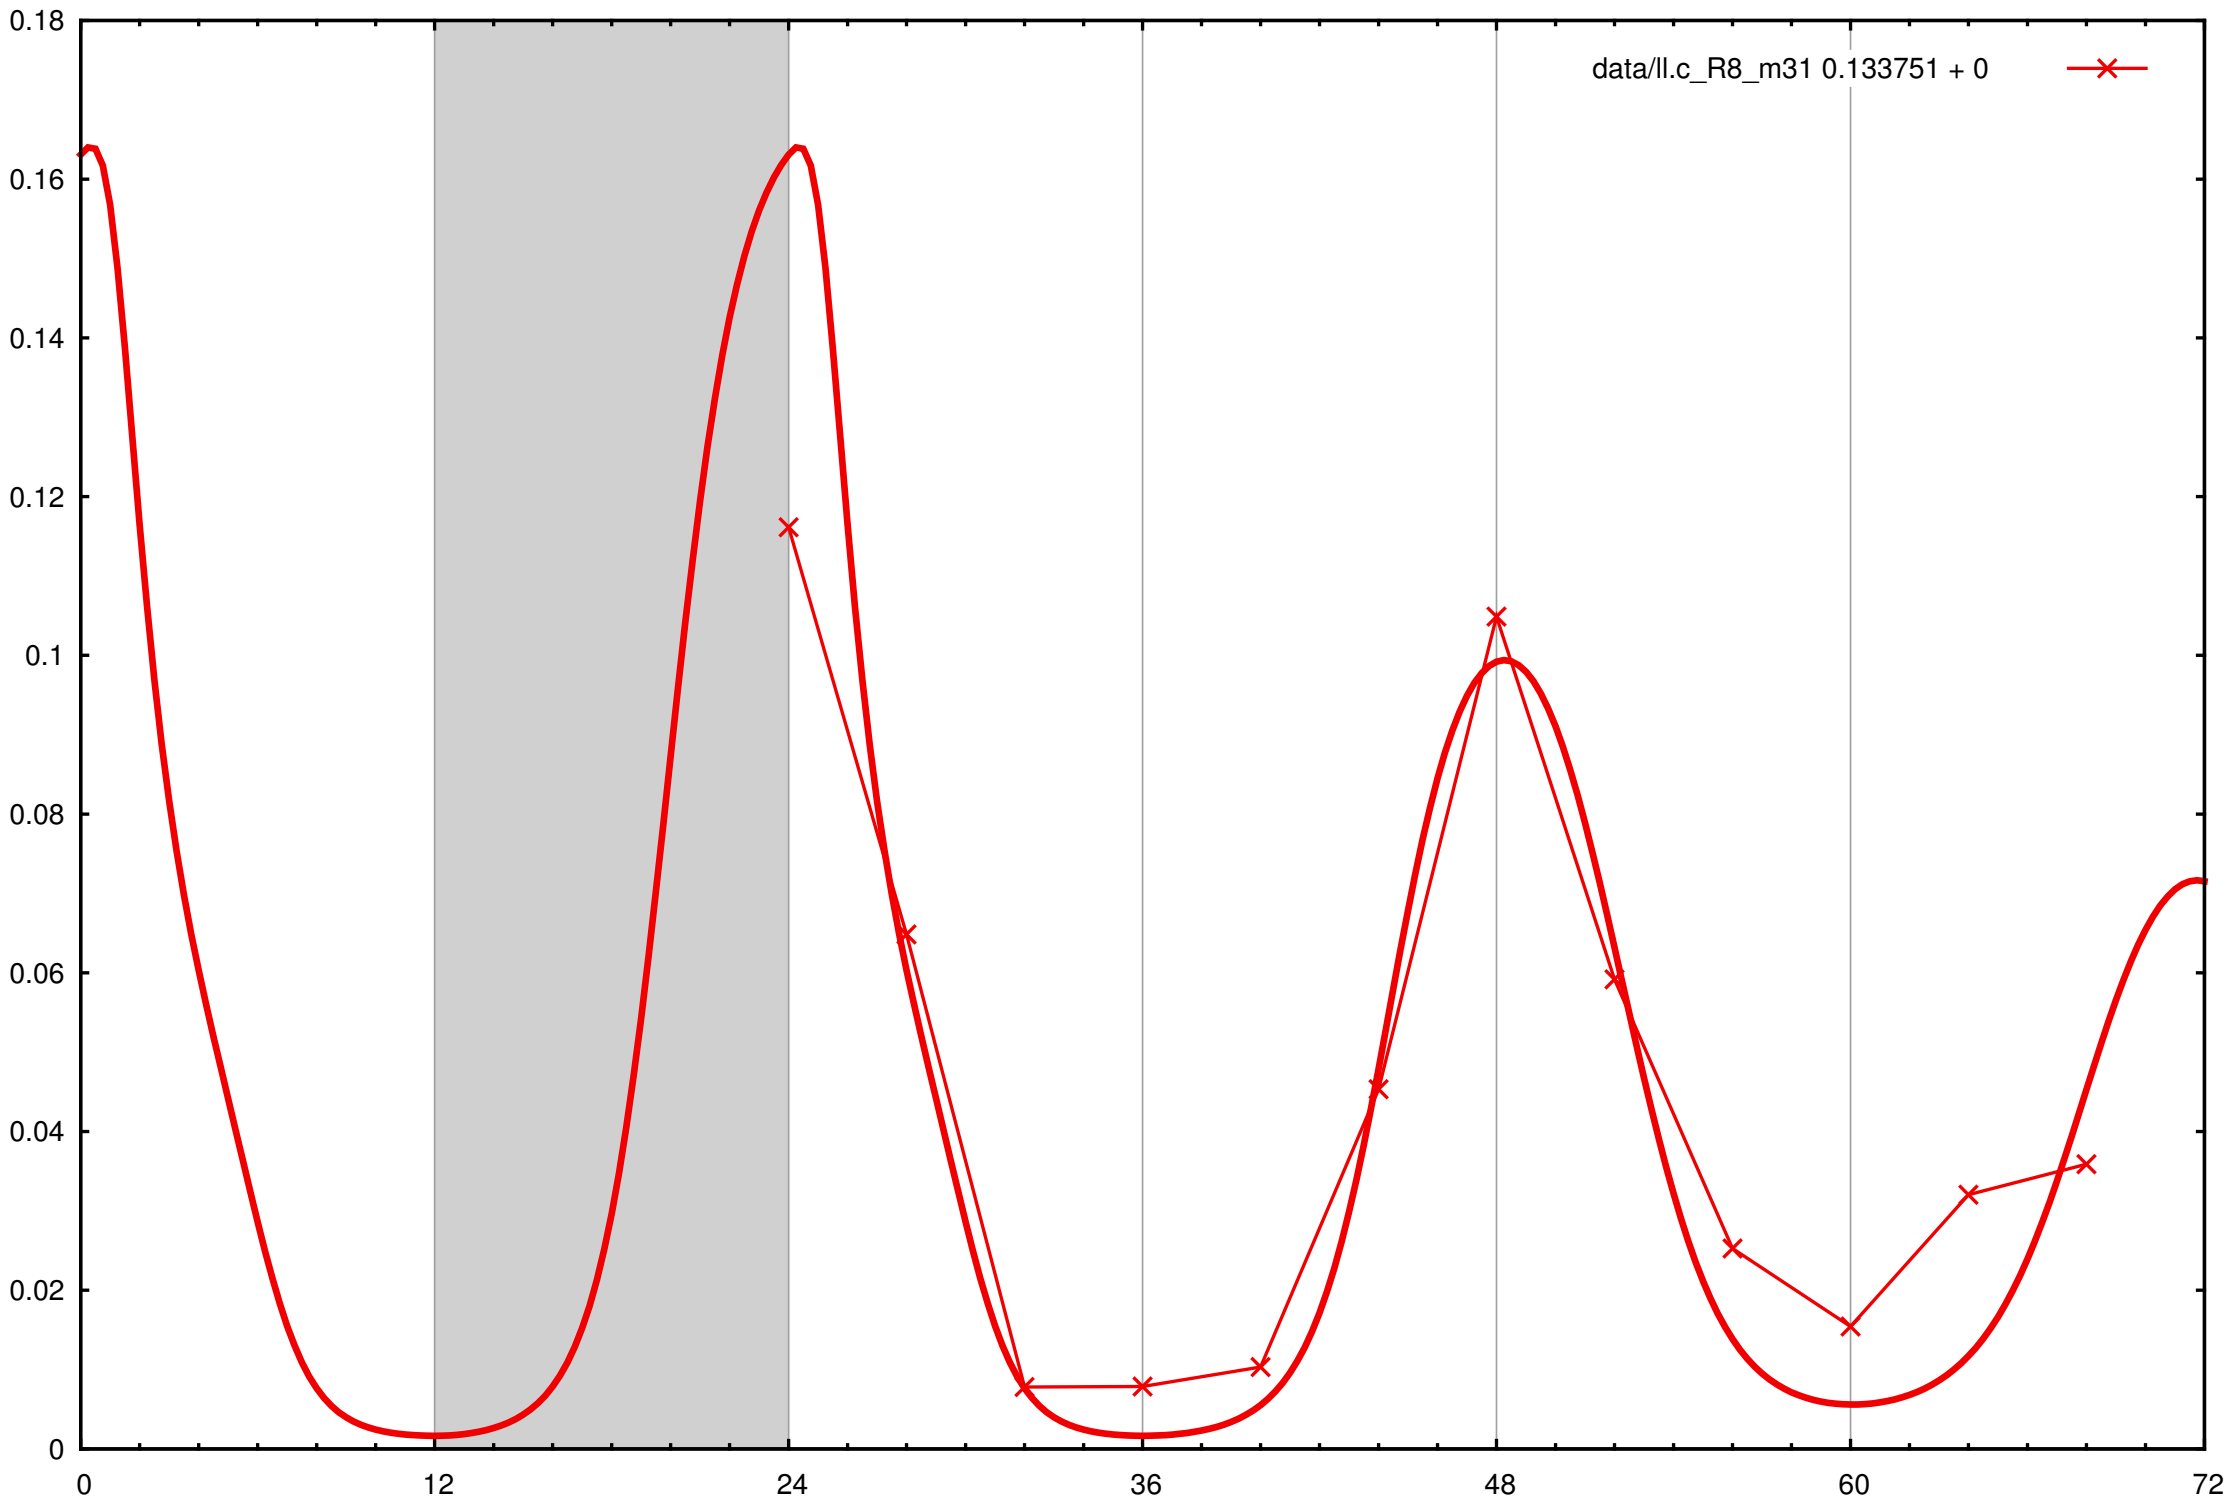

Scale group 283, scost 0

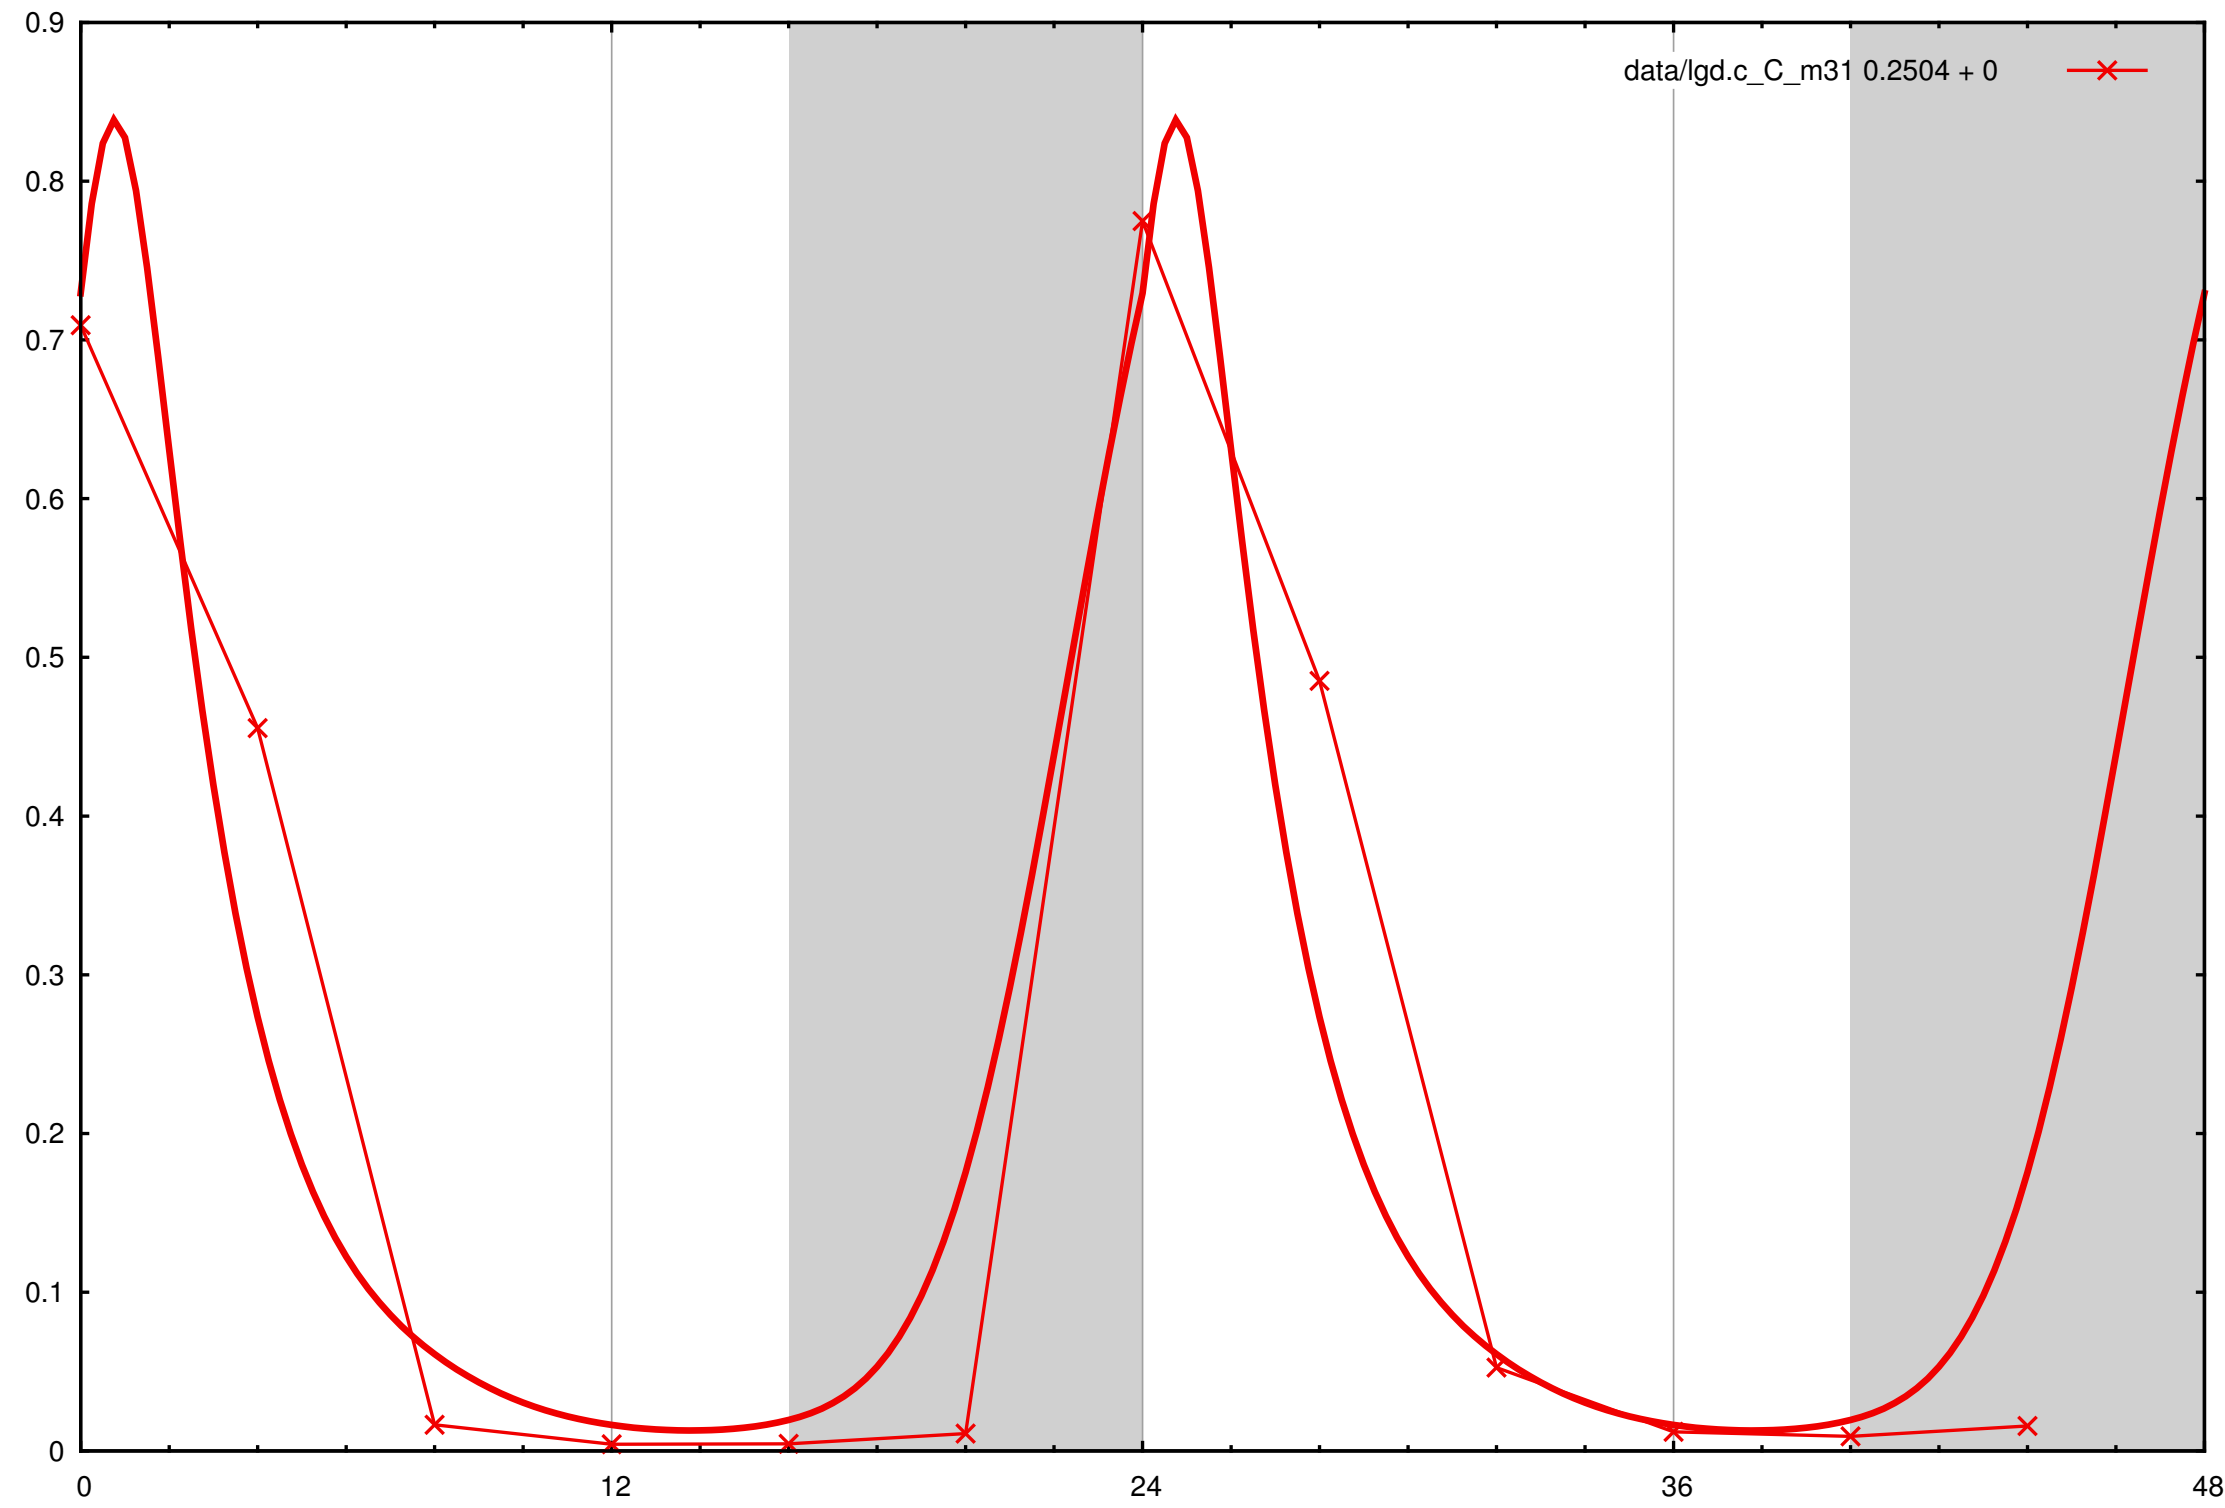

Scale group 284, scost 0

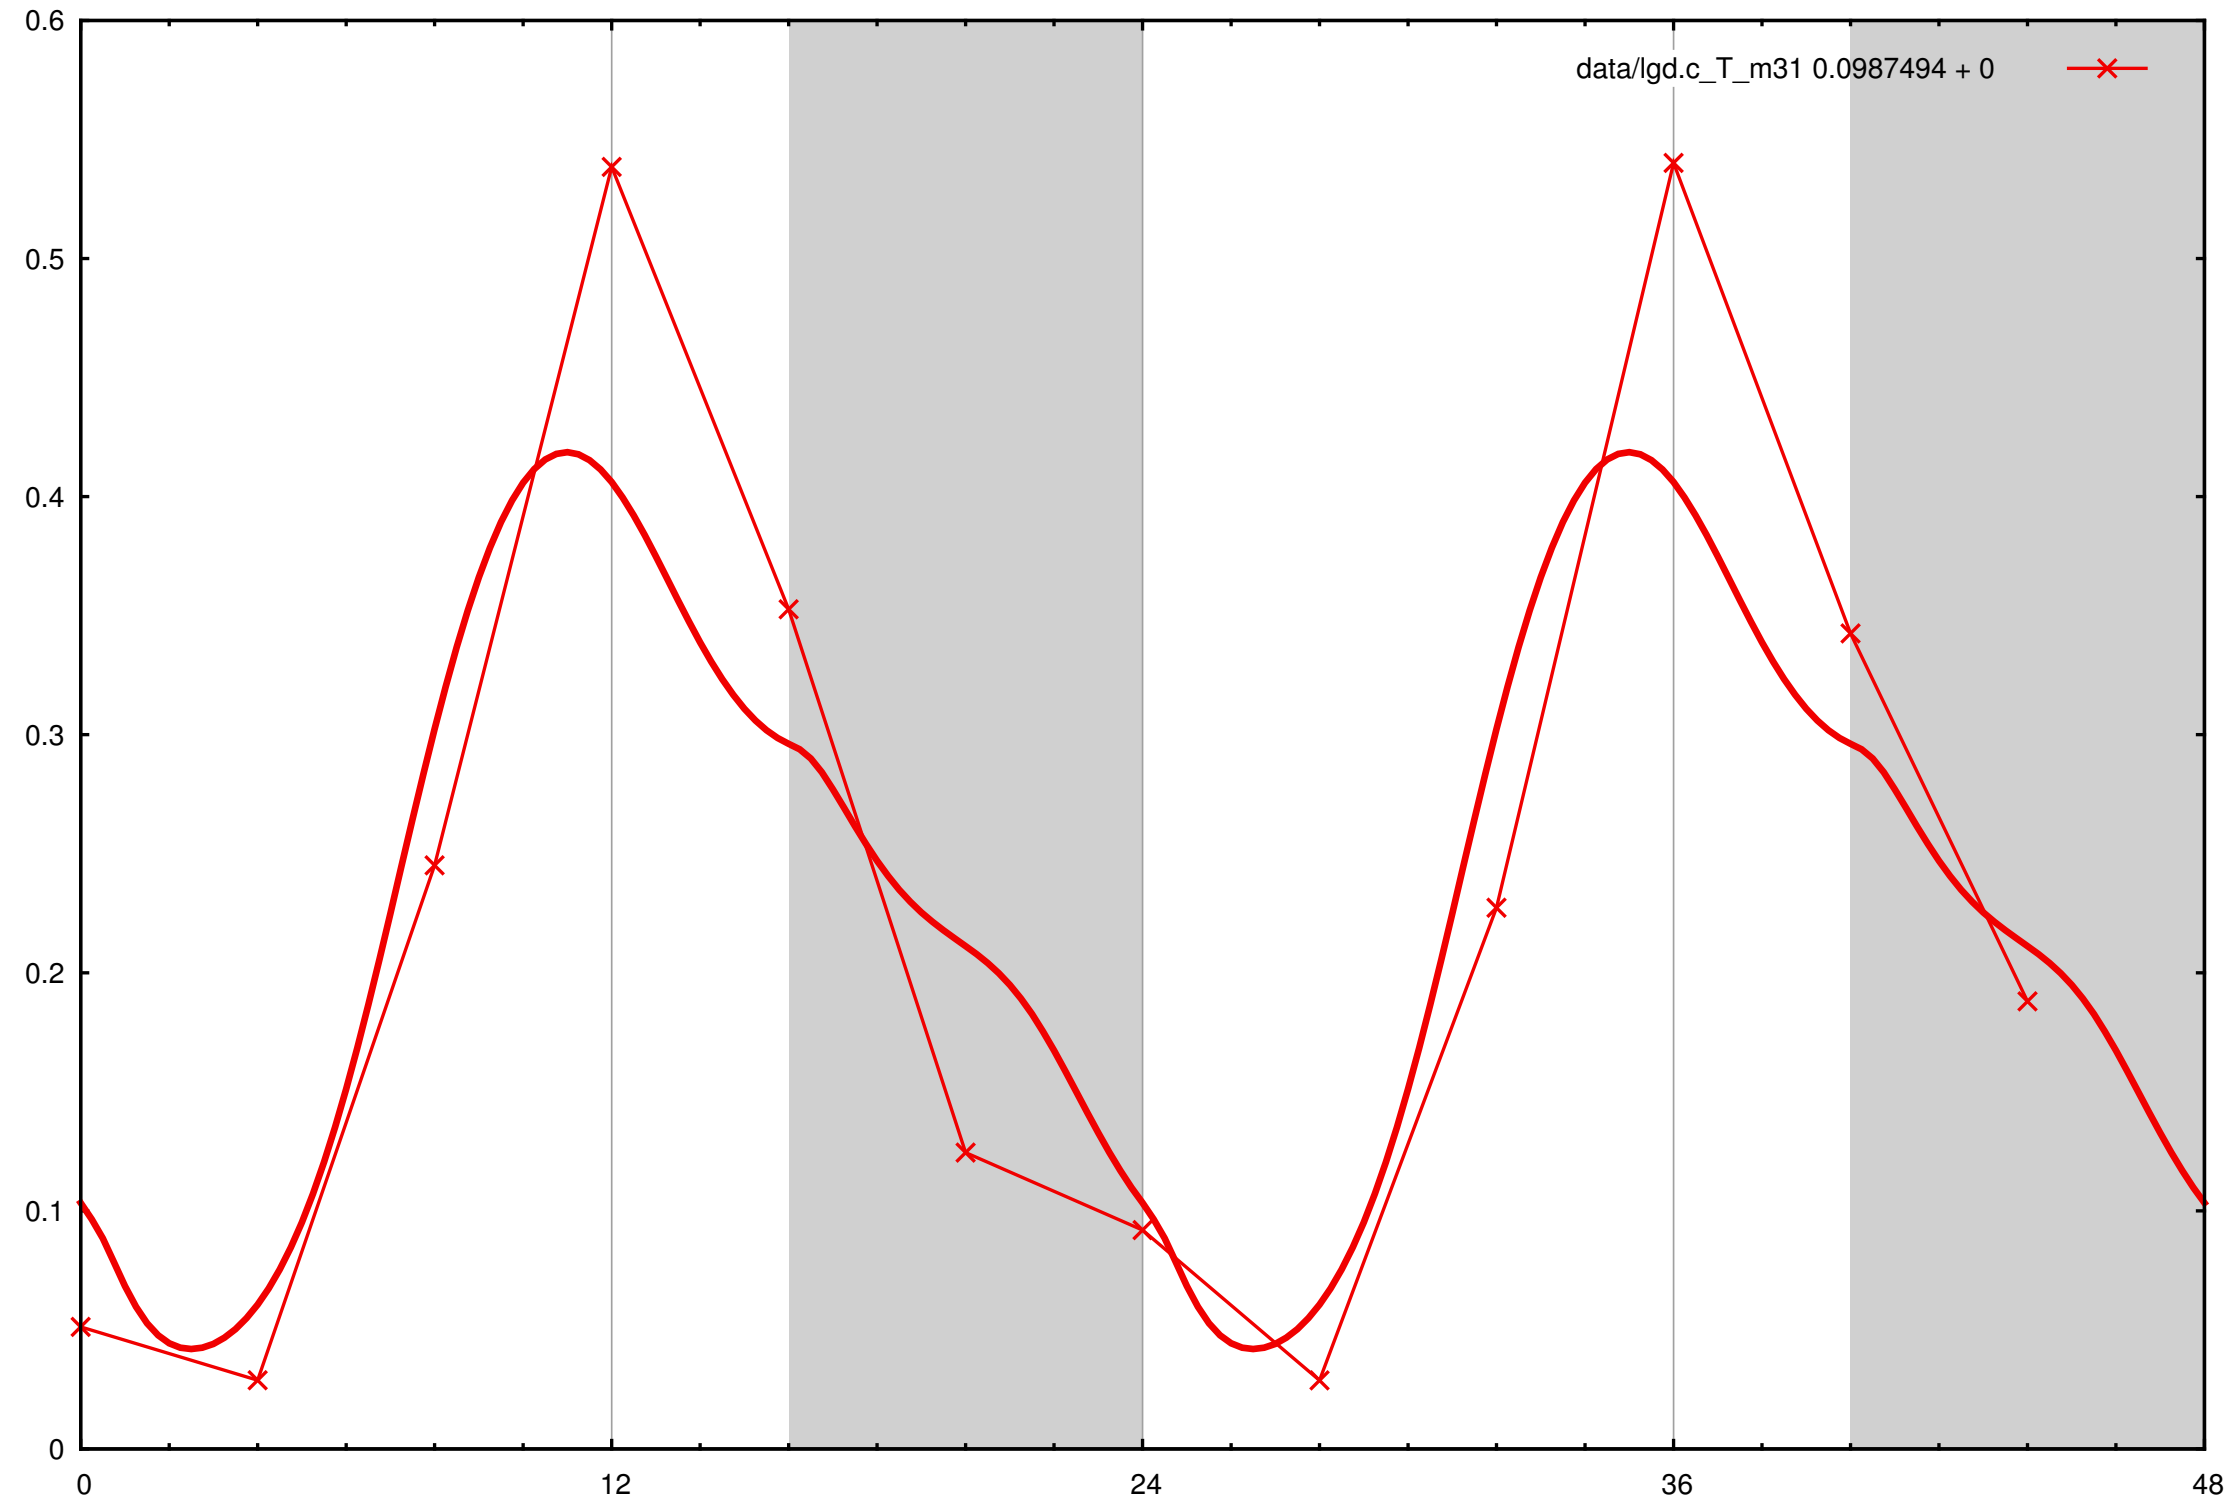

Scale group 285, scost 0

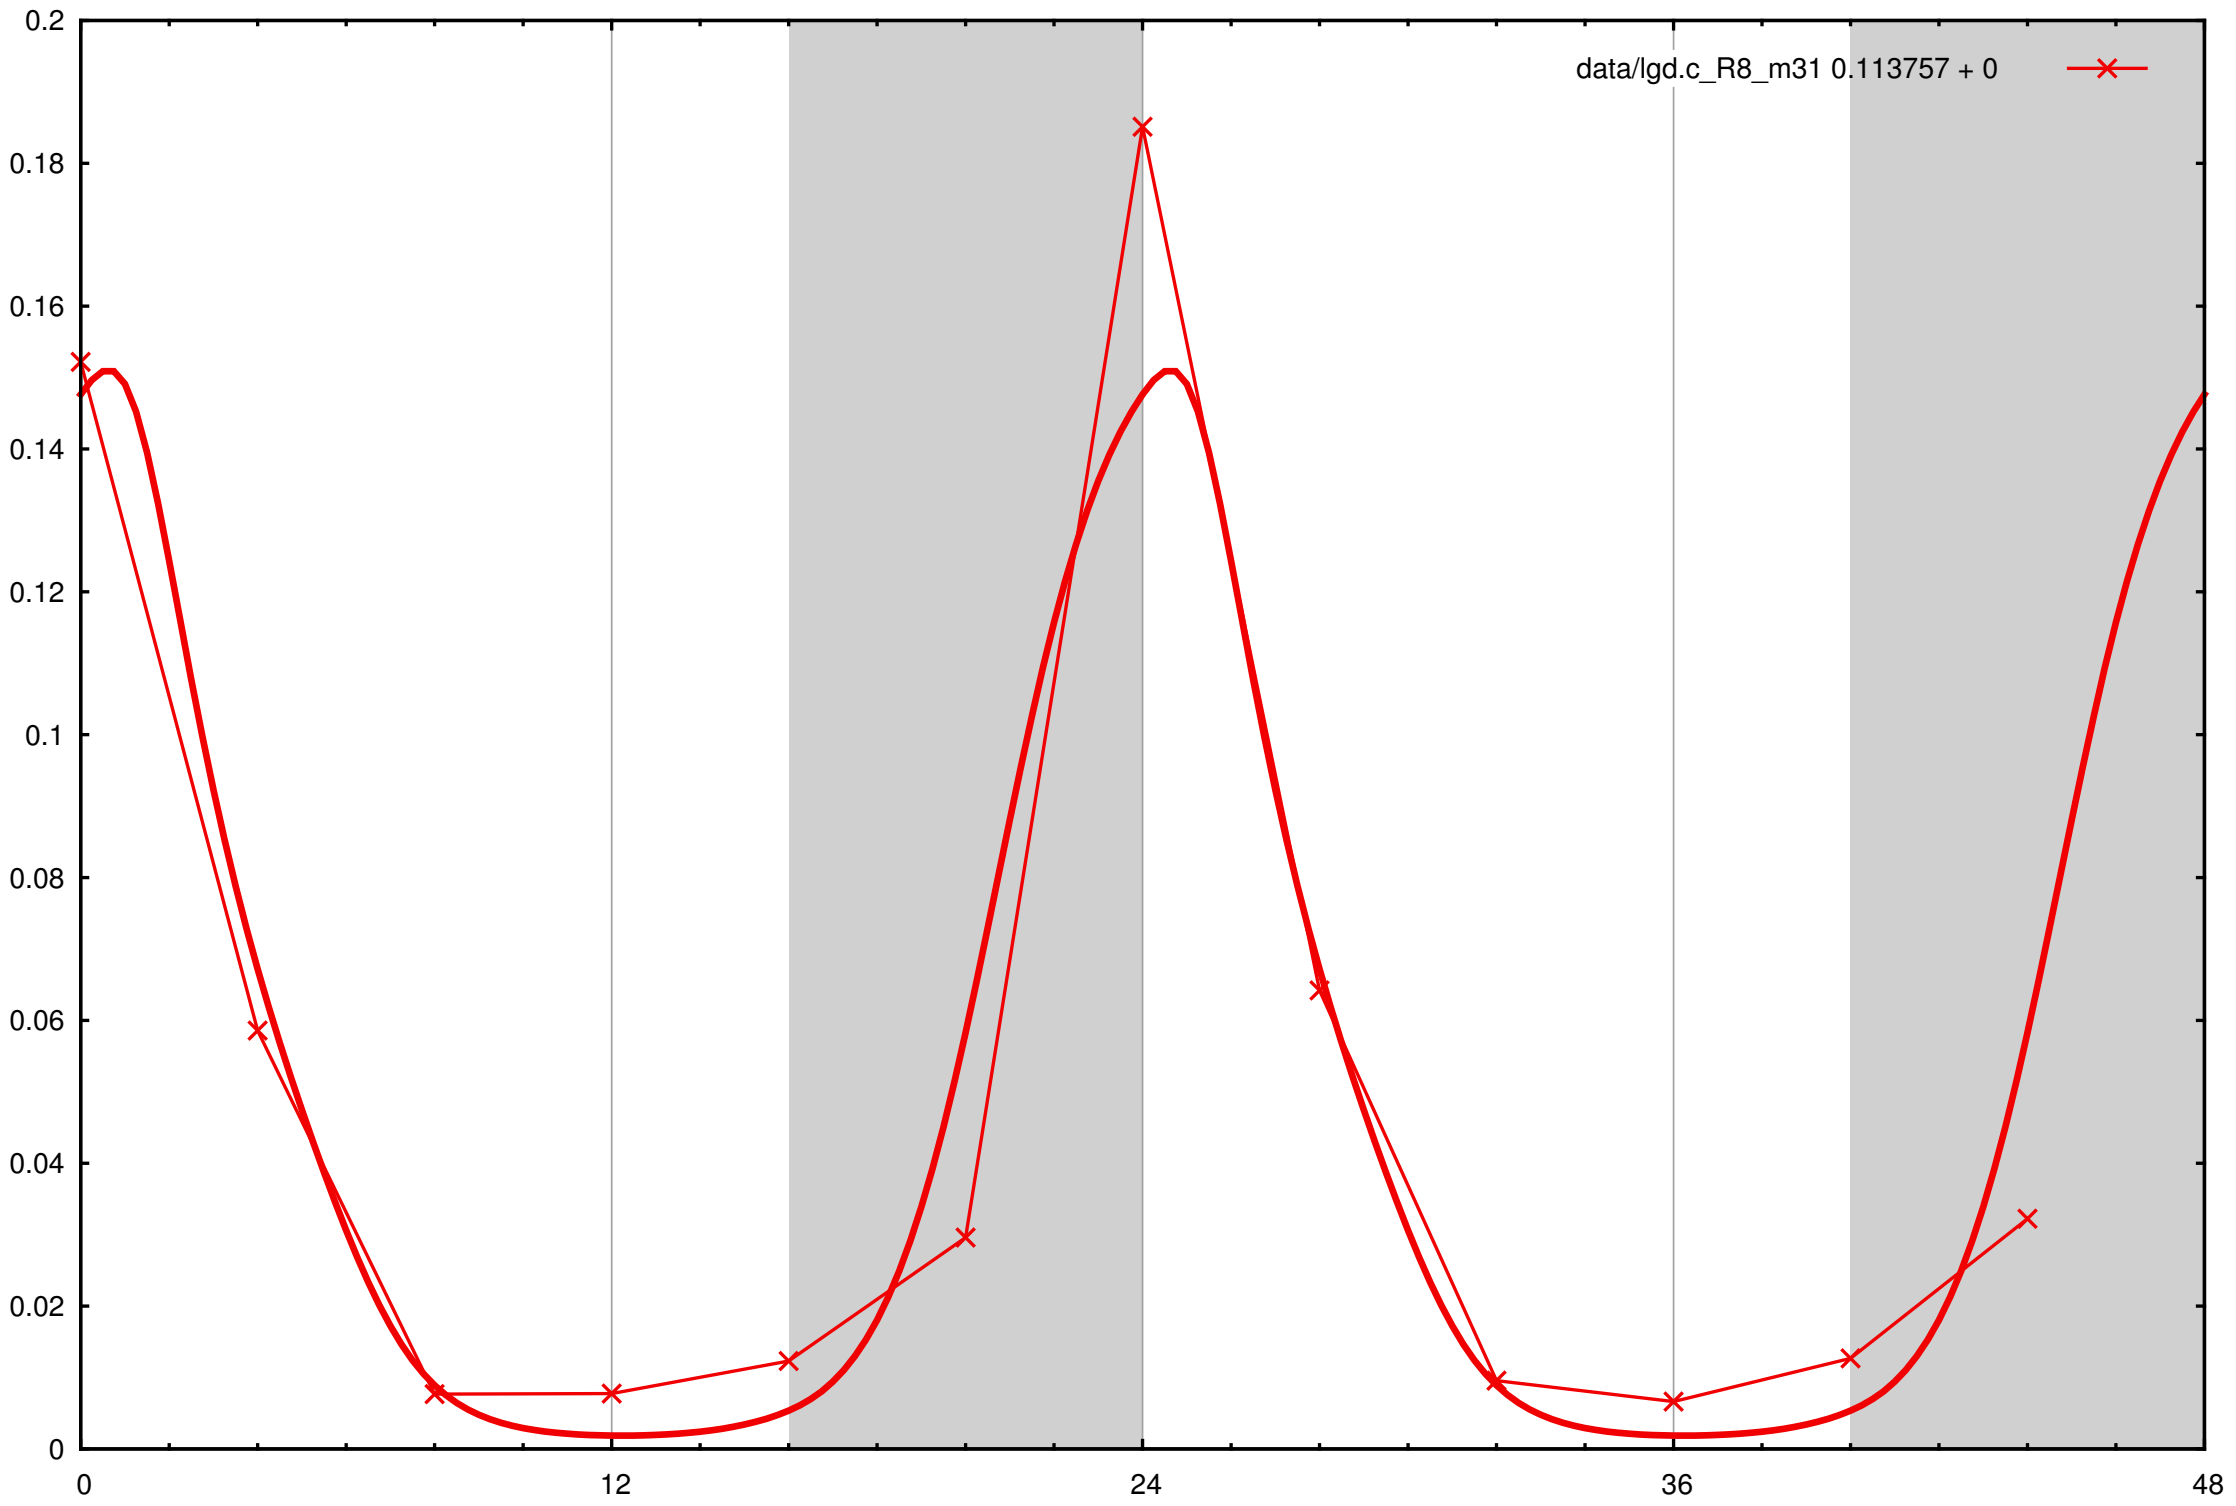

Scale group 286, scost 0

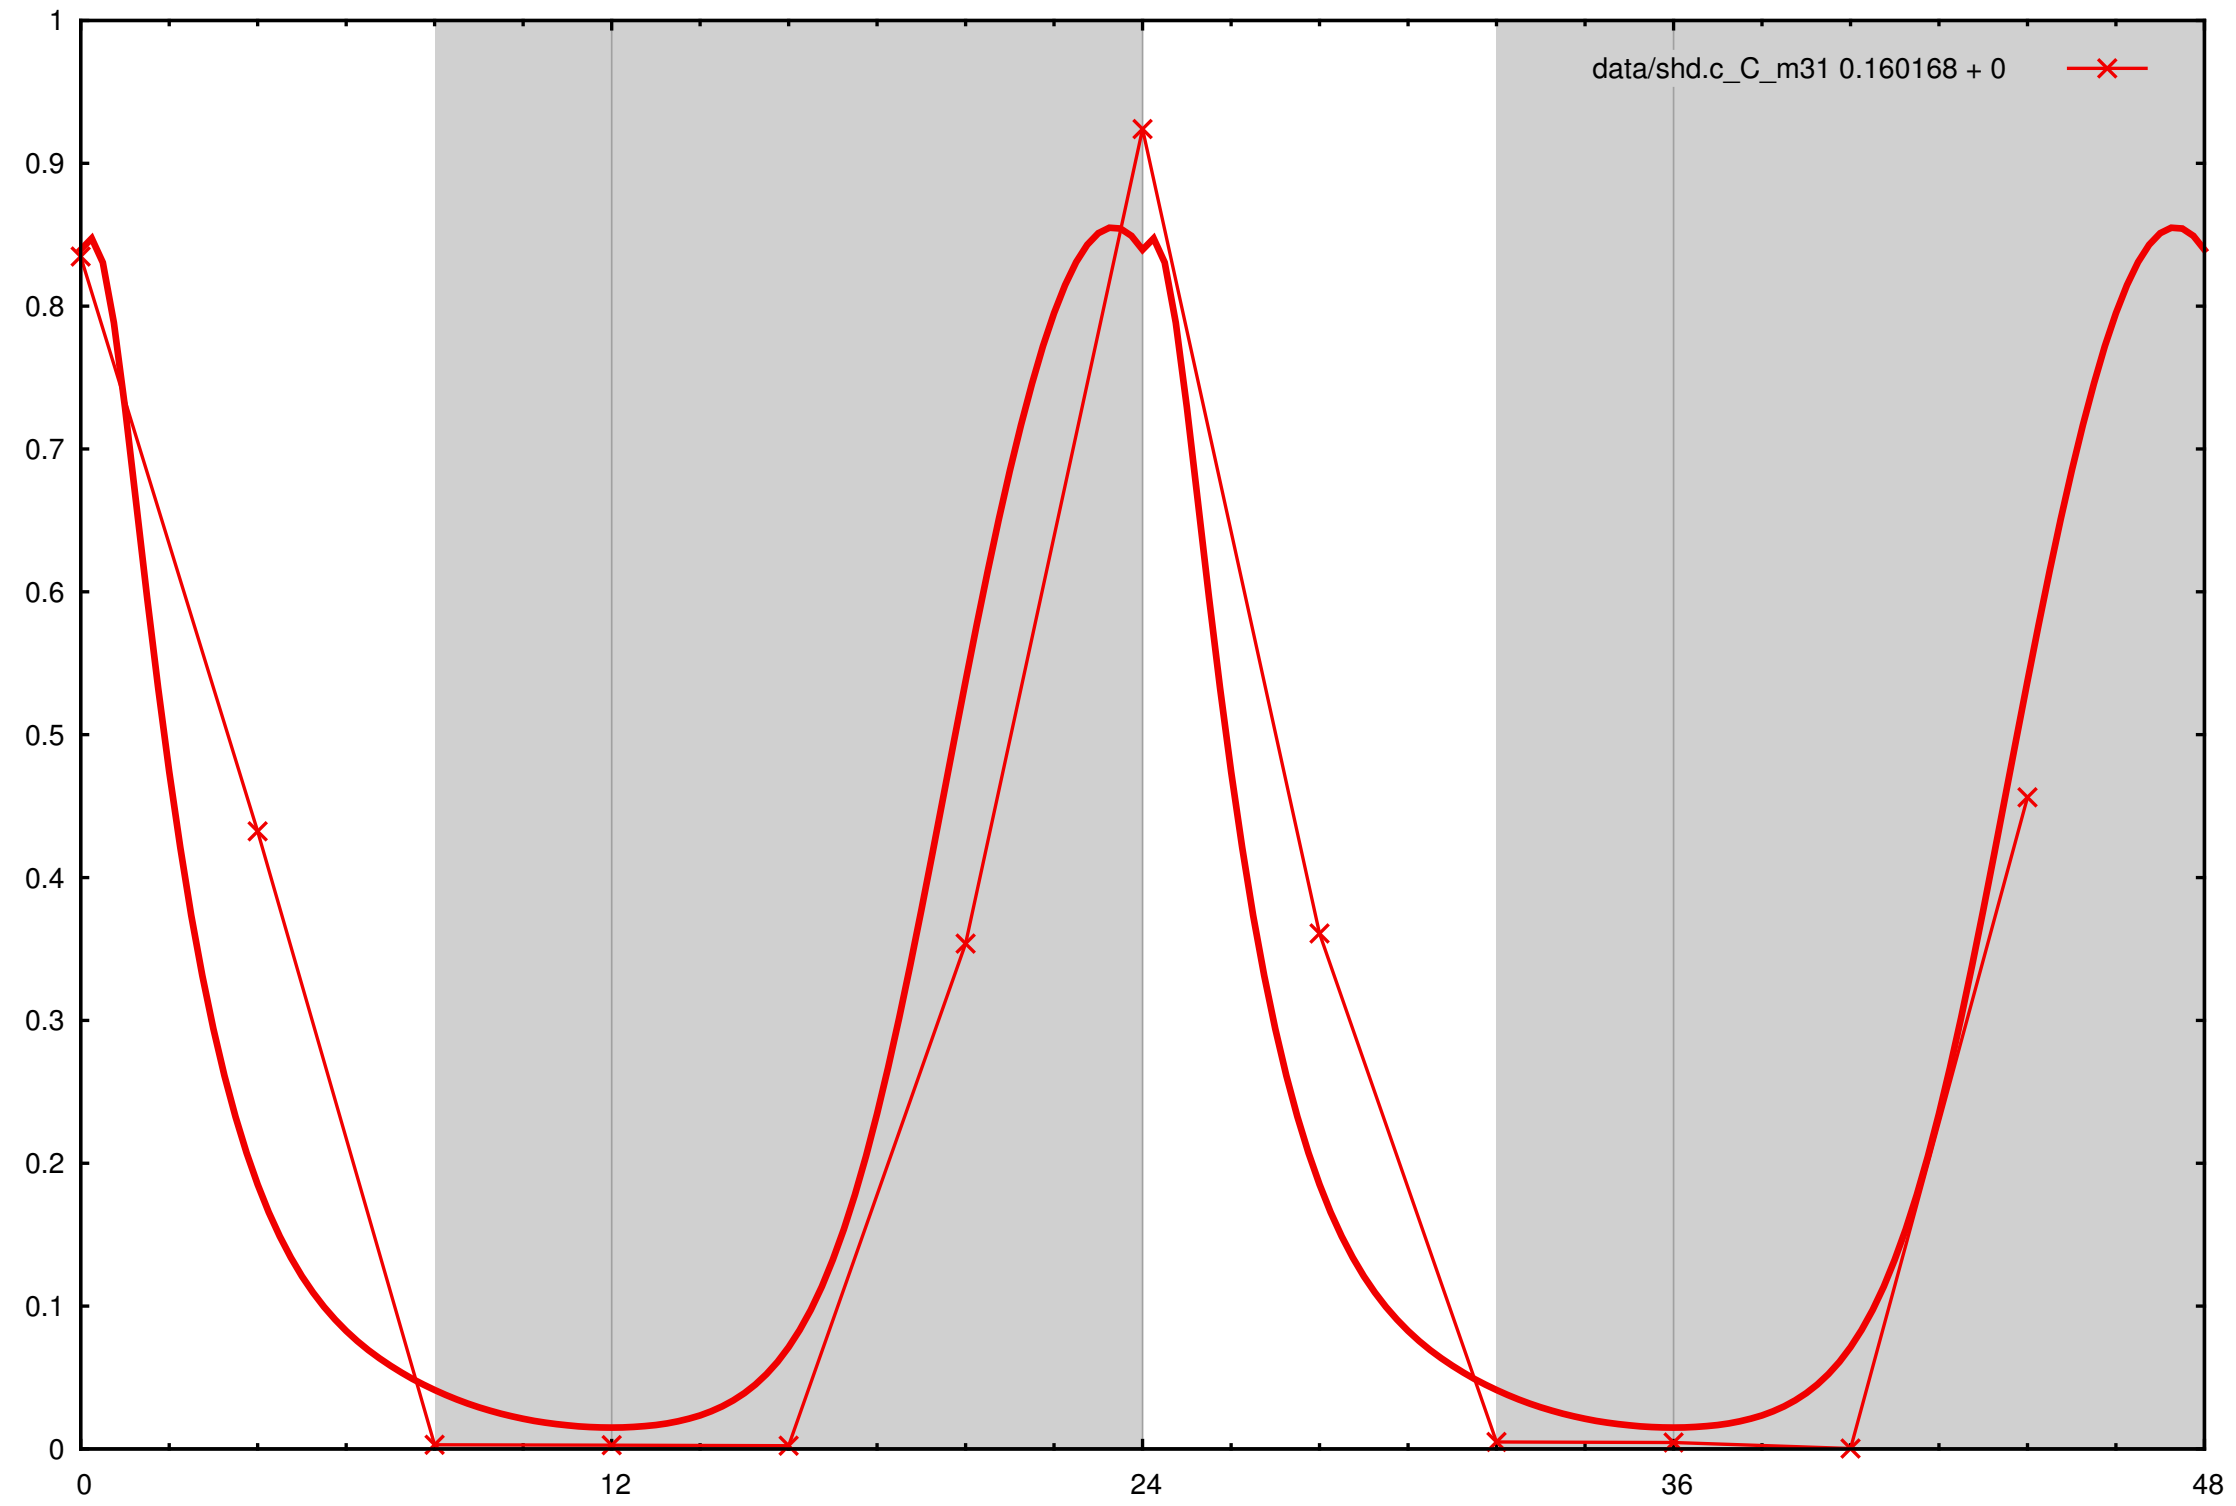

Scale group 287, scost 0

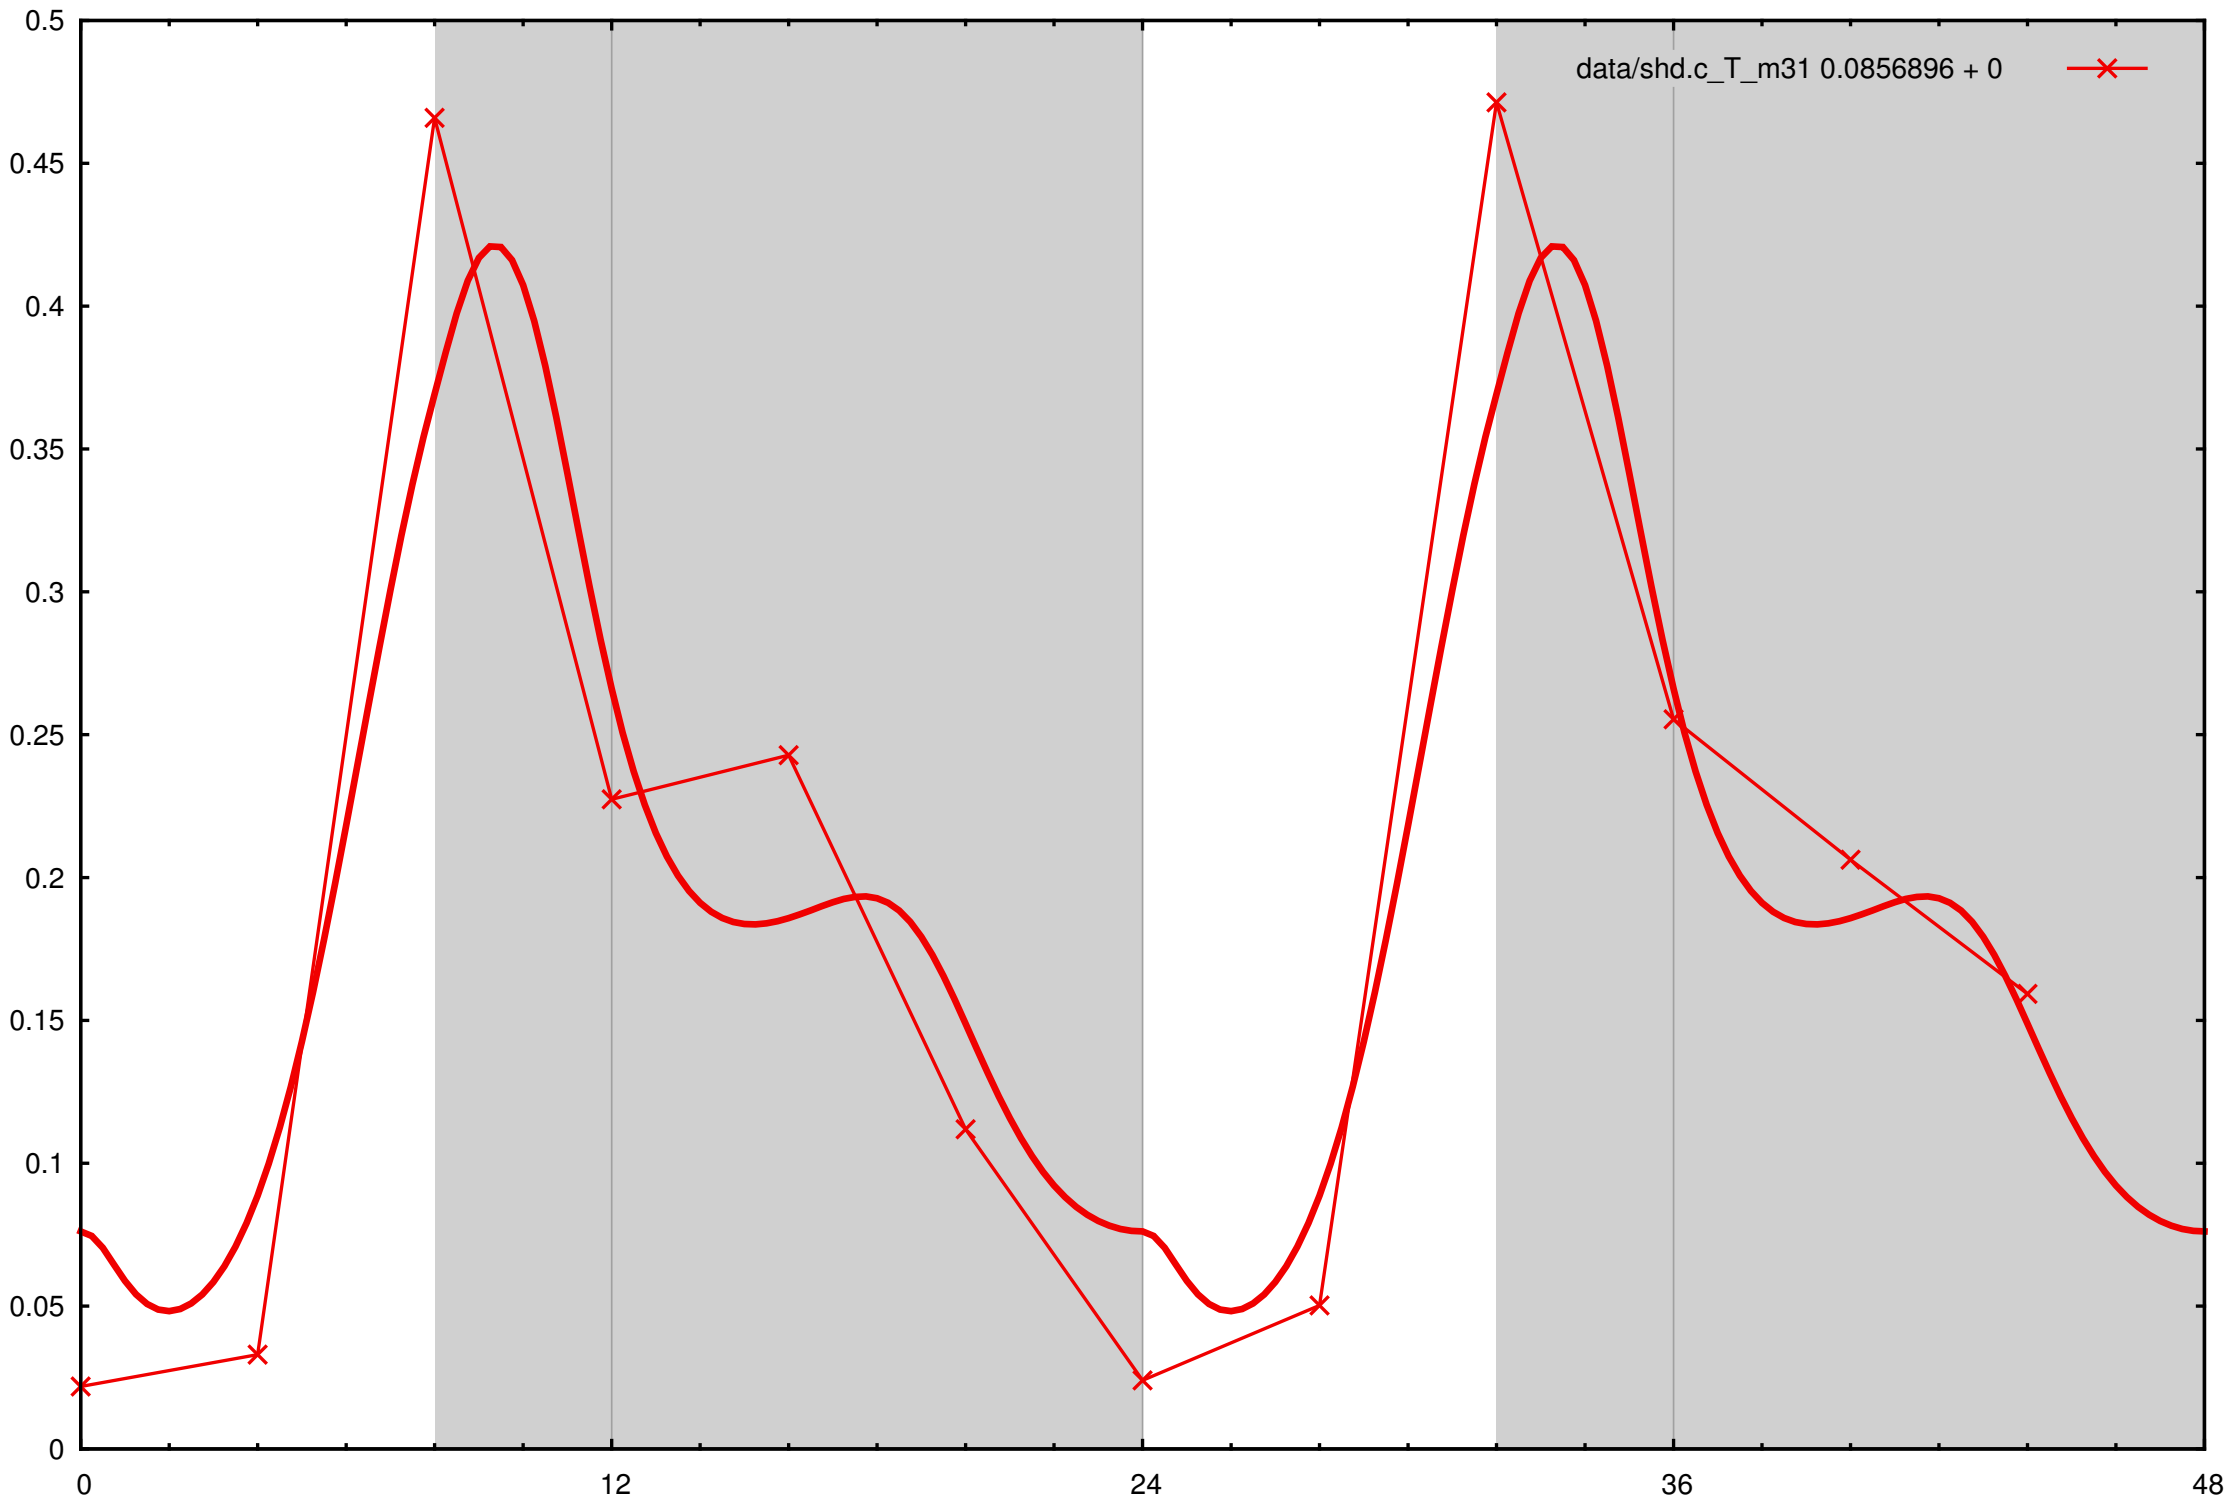

Scale group 288, scost 0

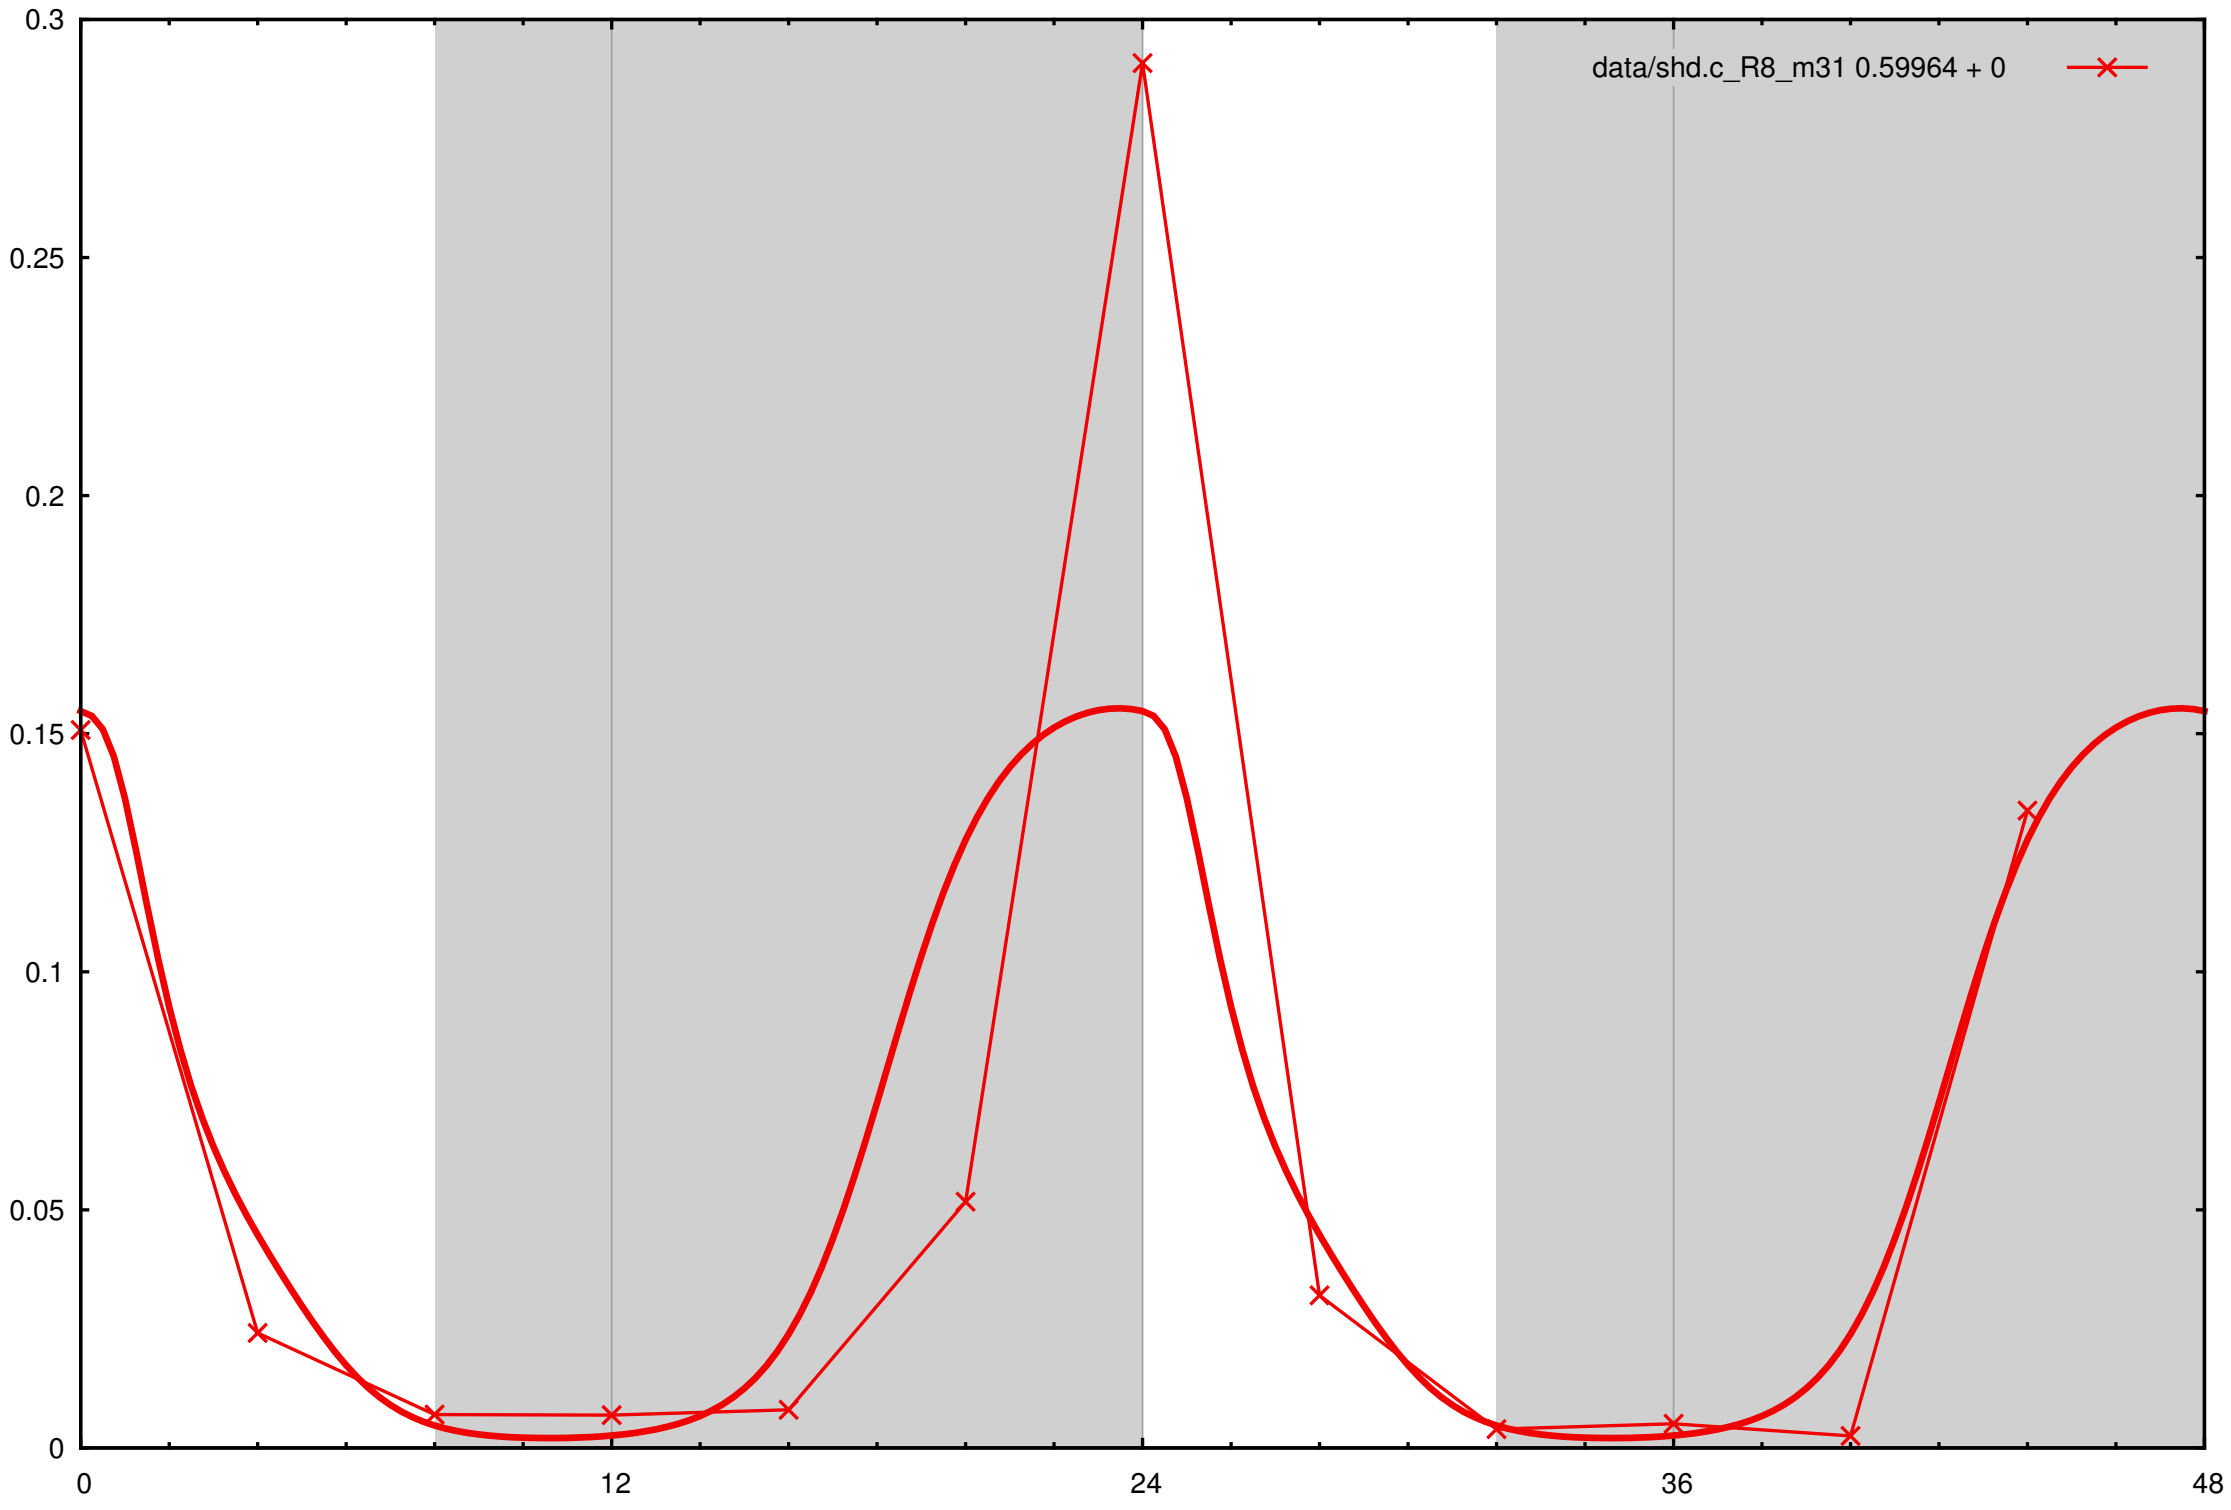



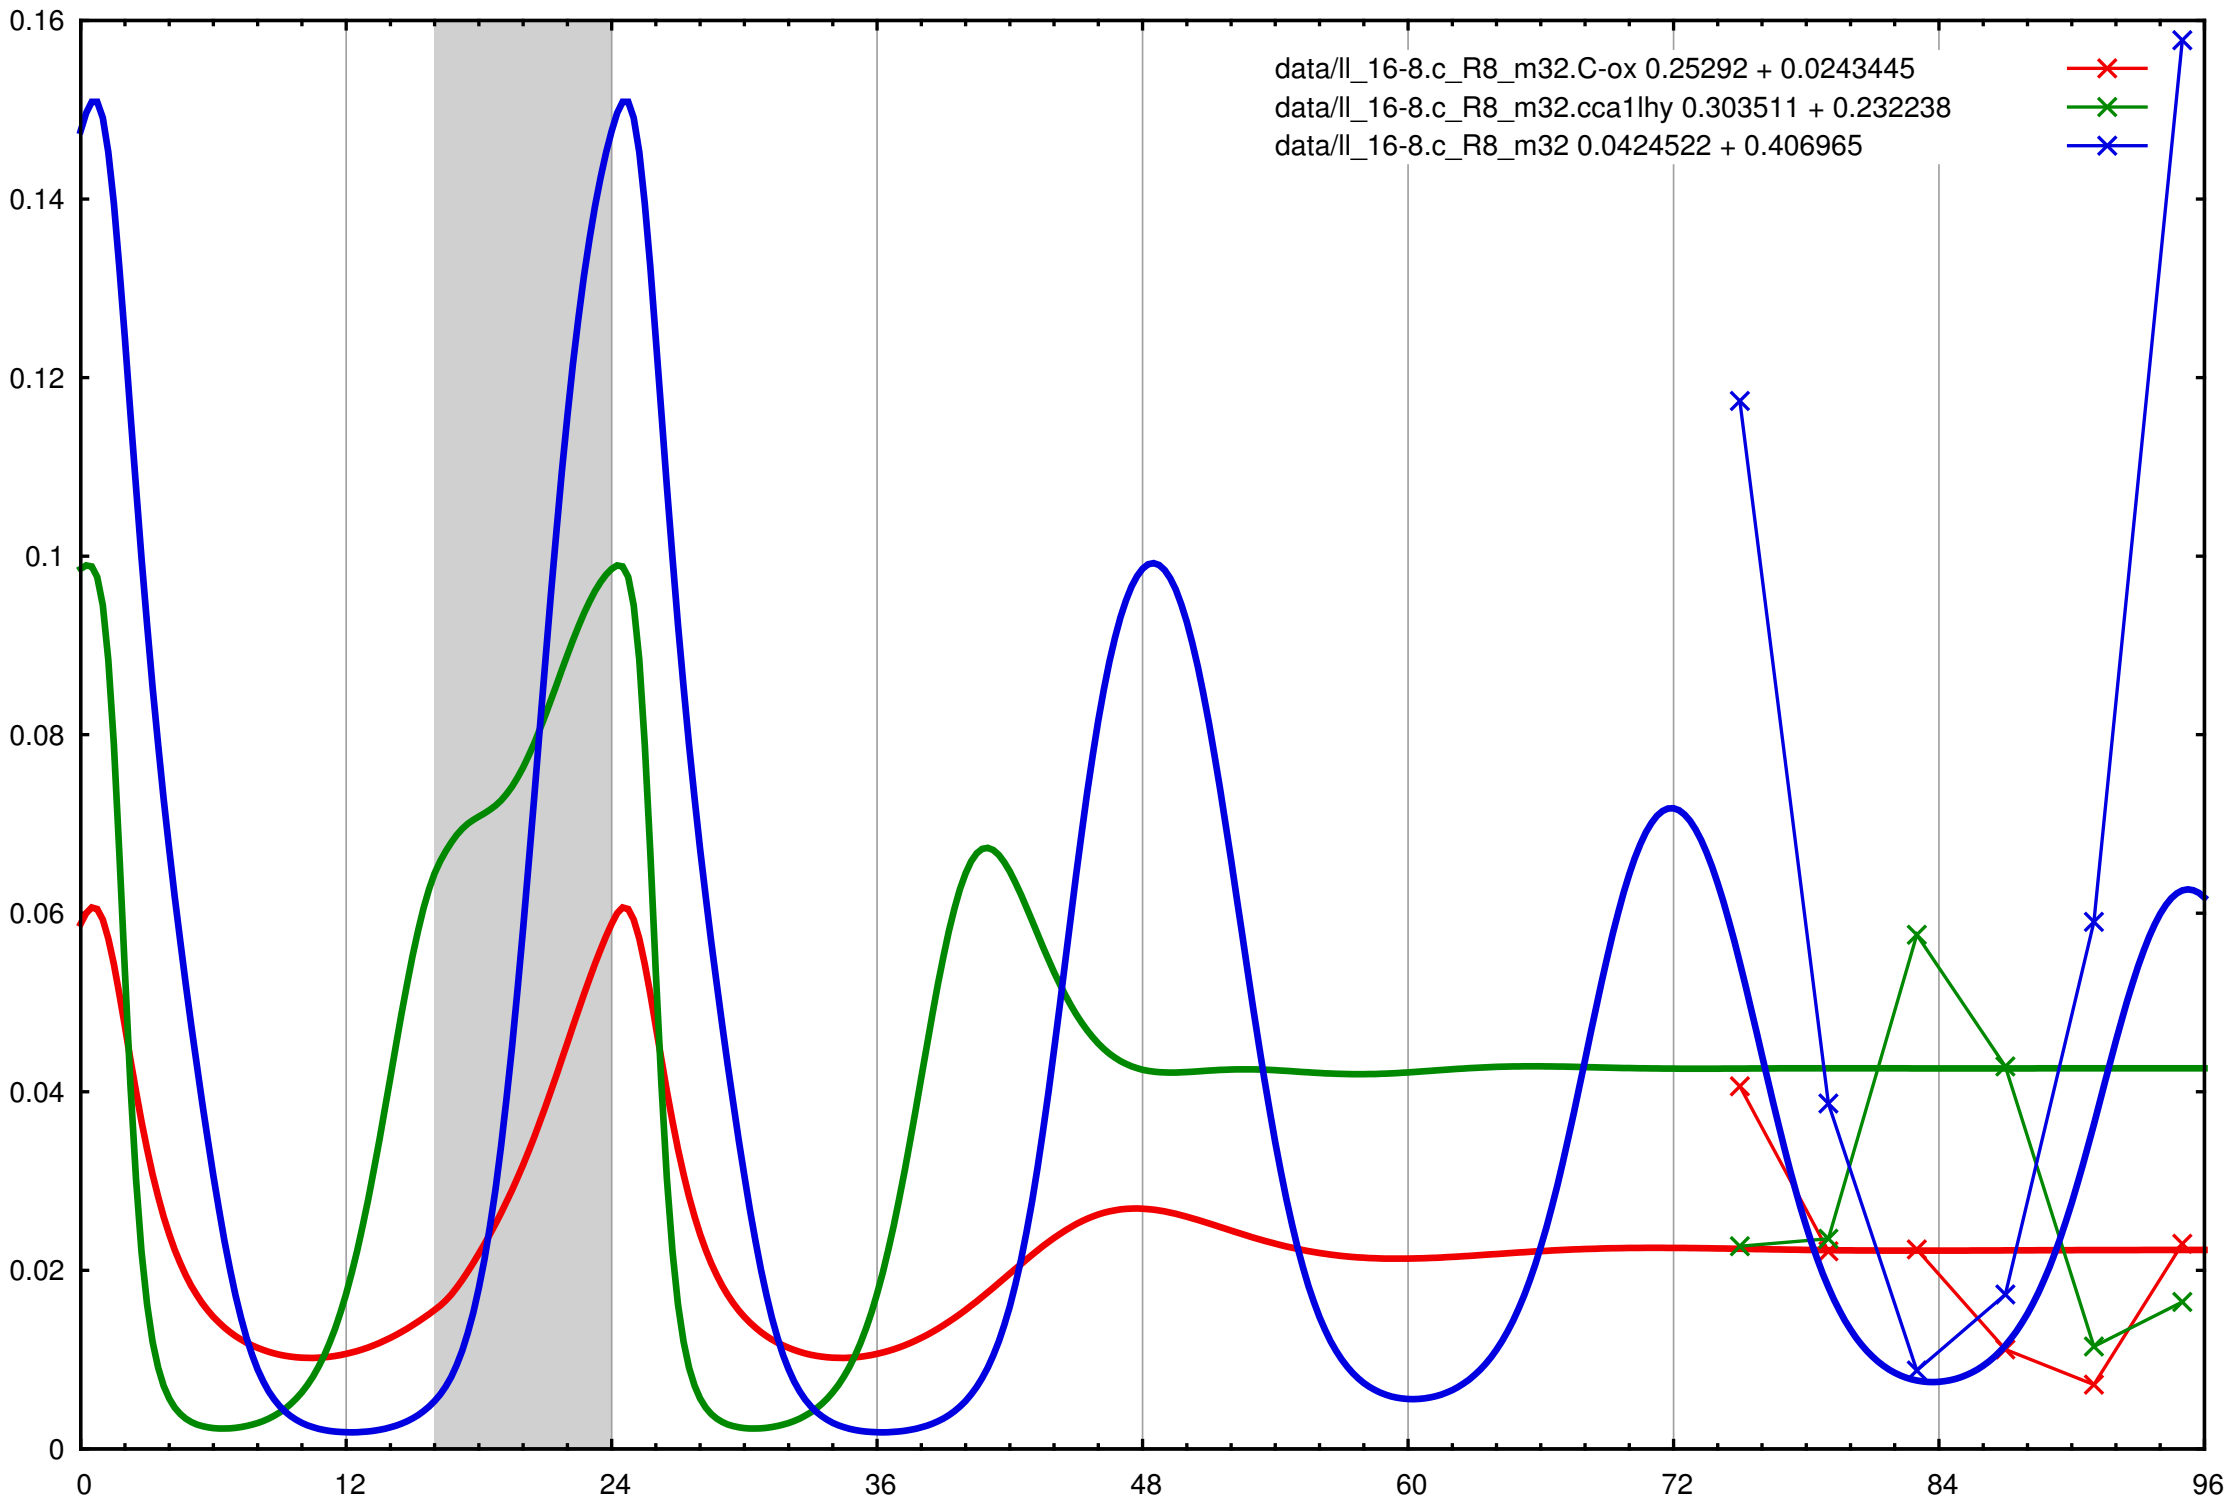

Scale group 290, scost 0.000405432

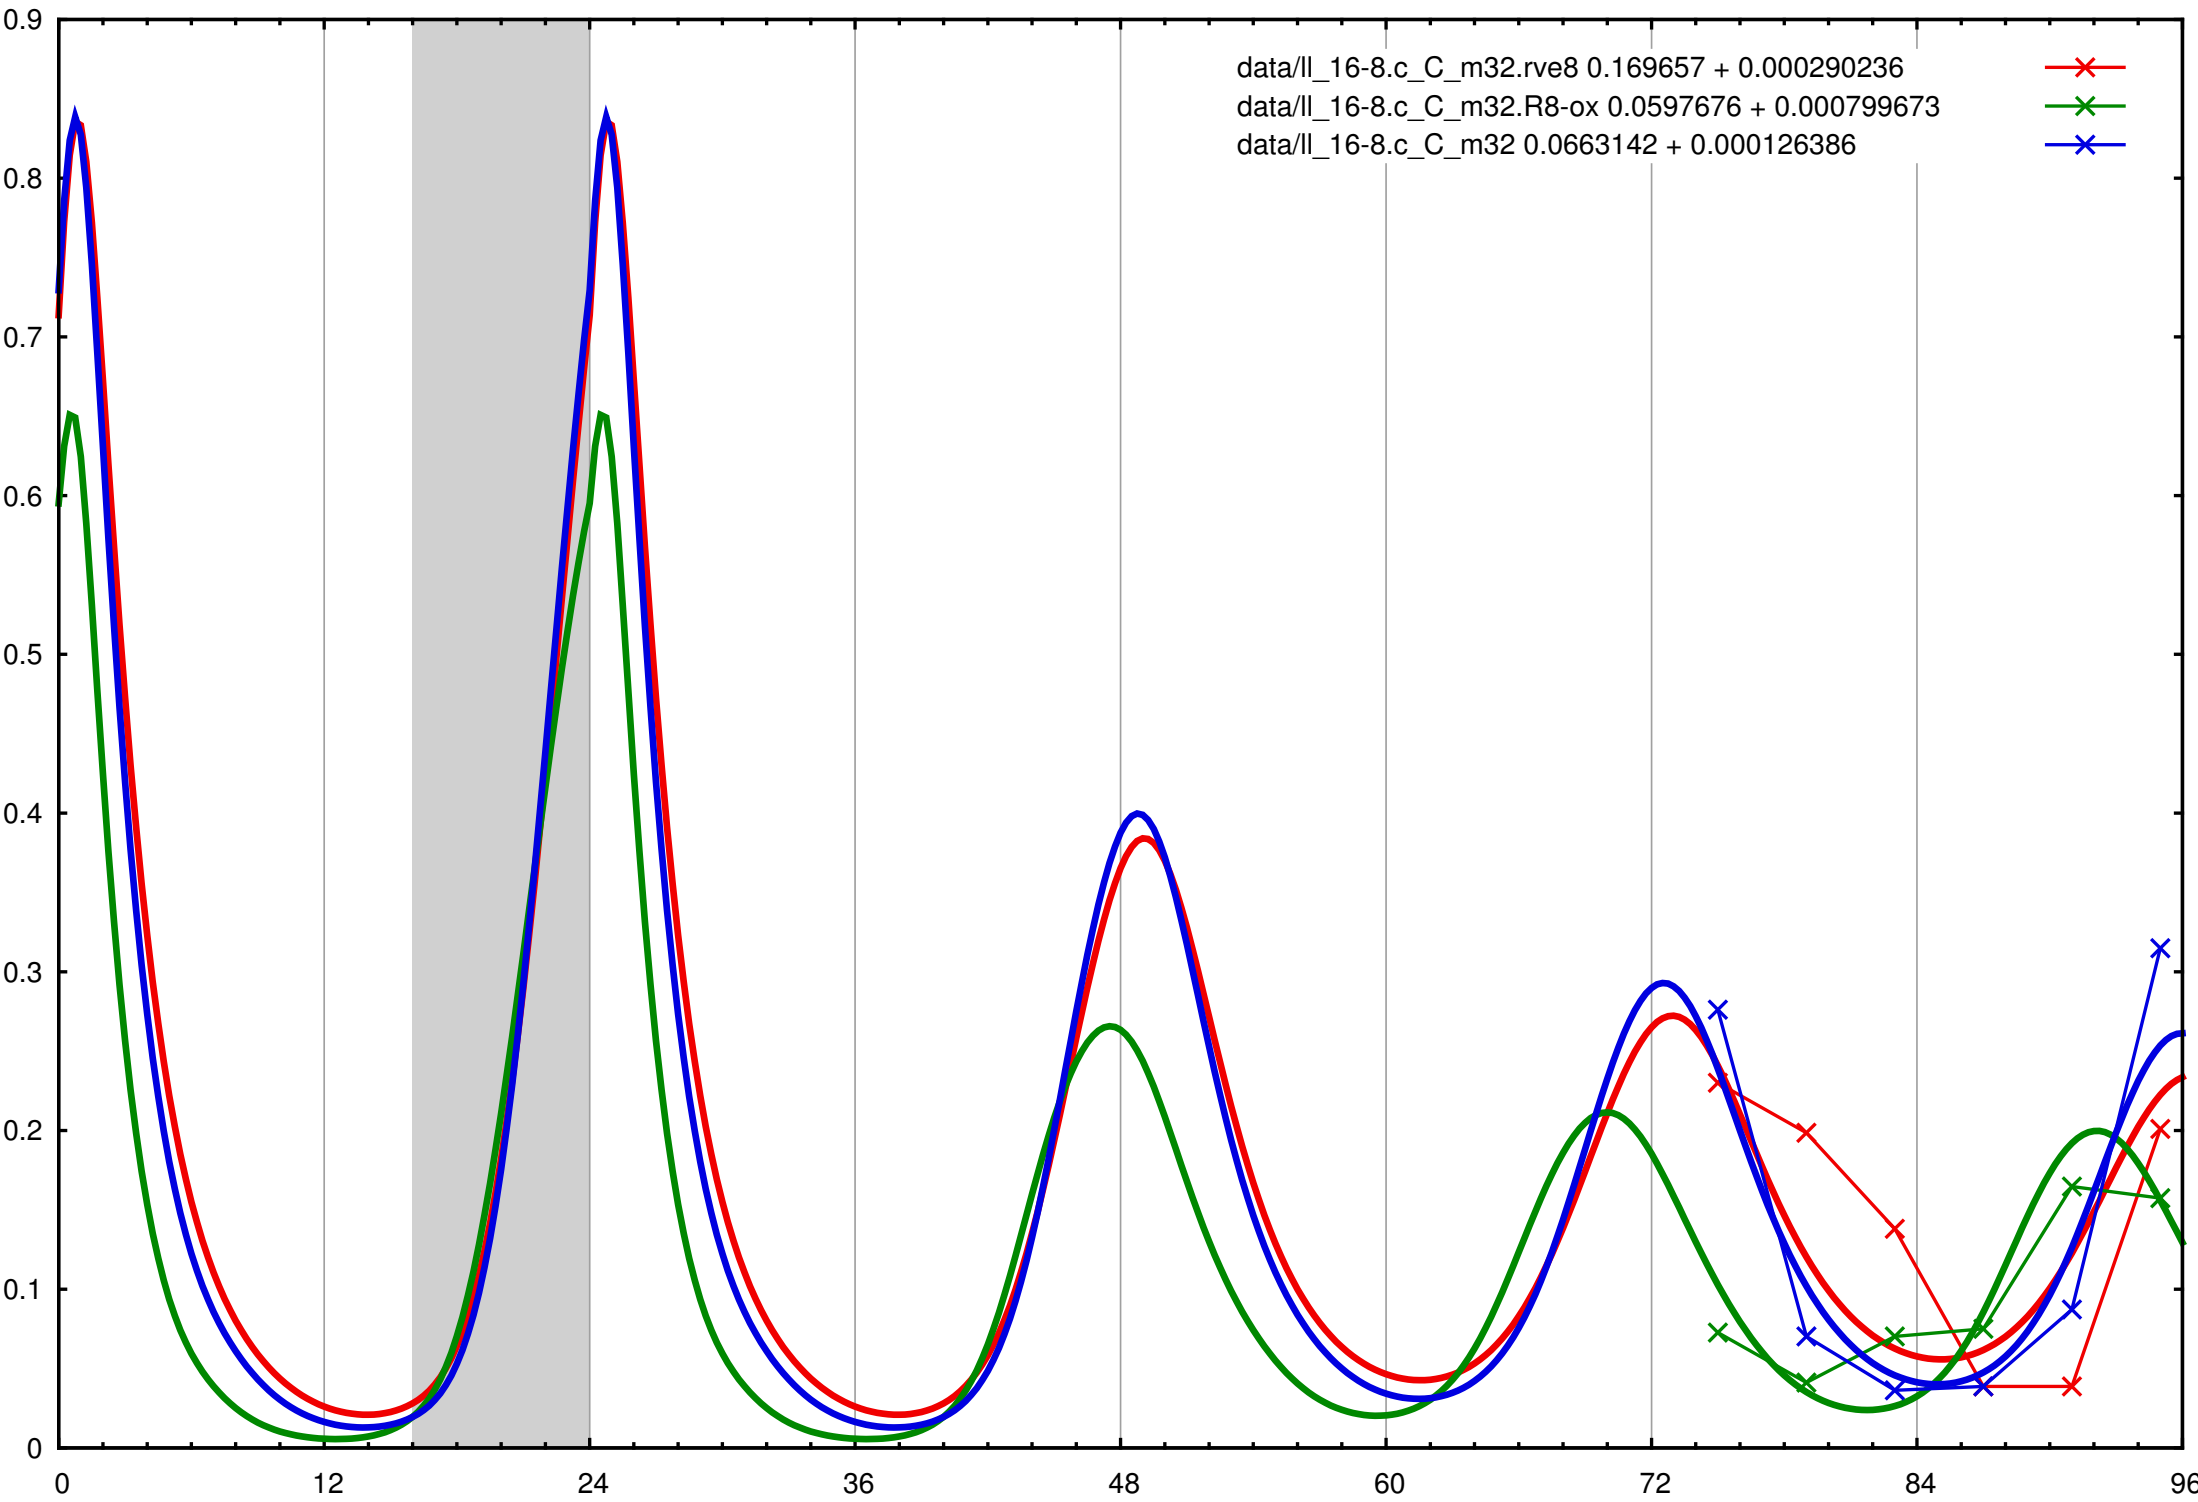

Scale group 291, scost 0.0489845

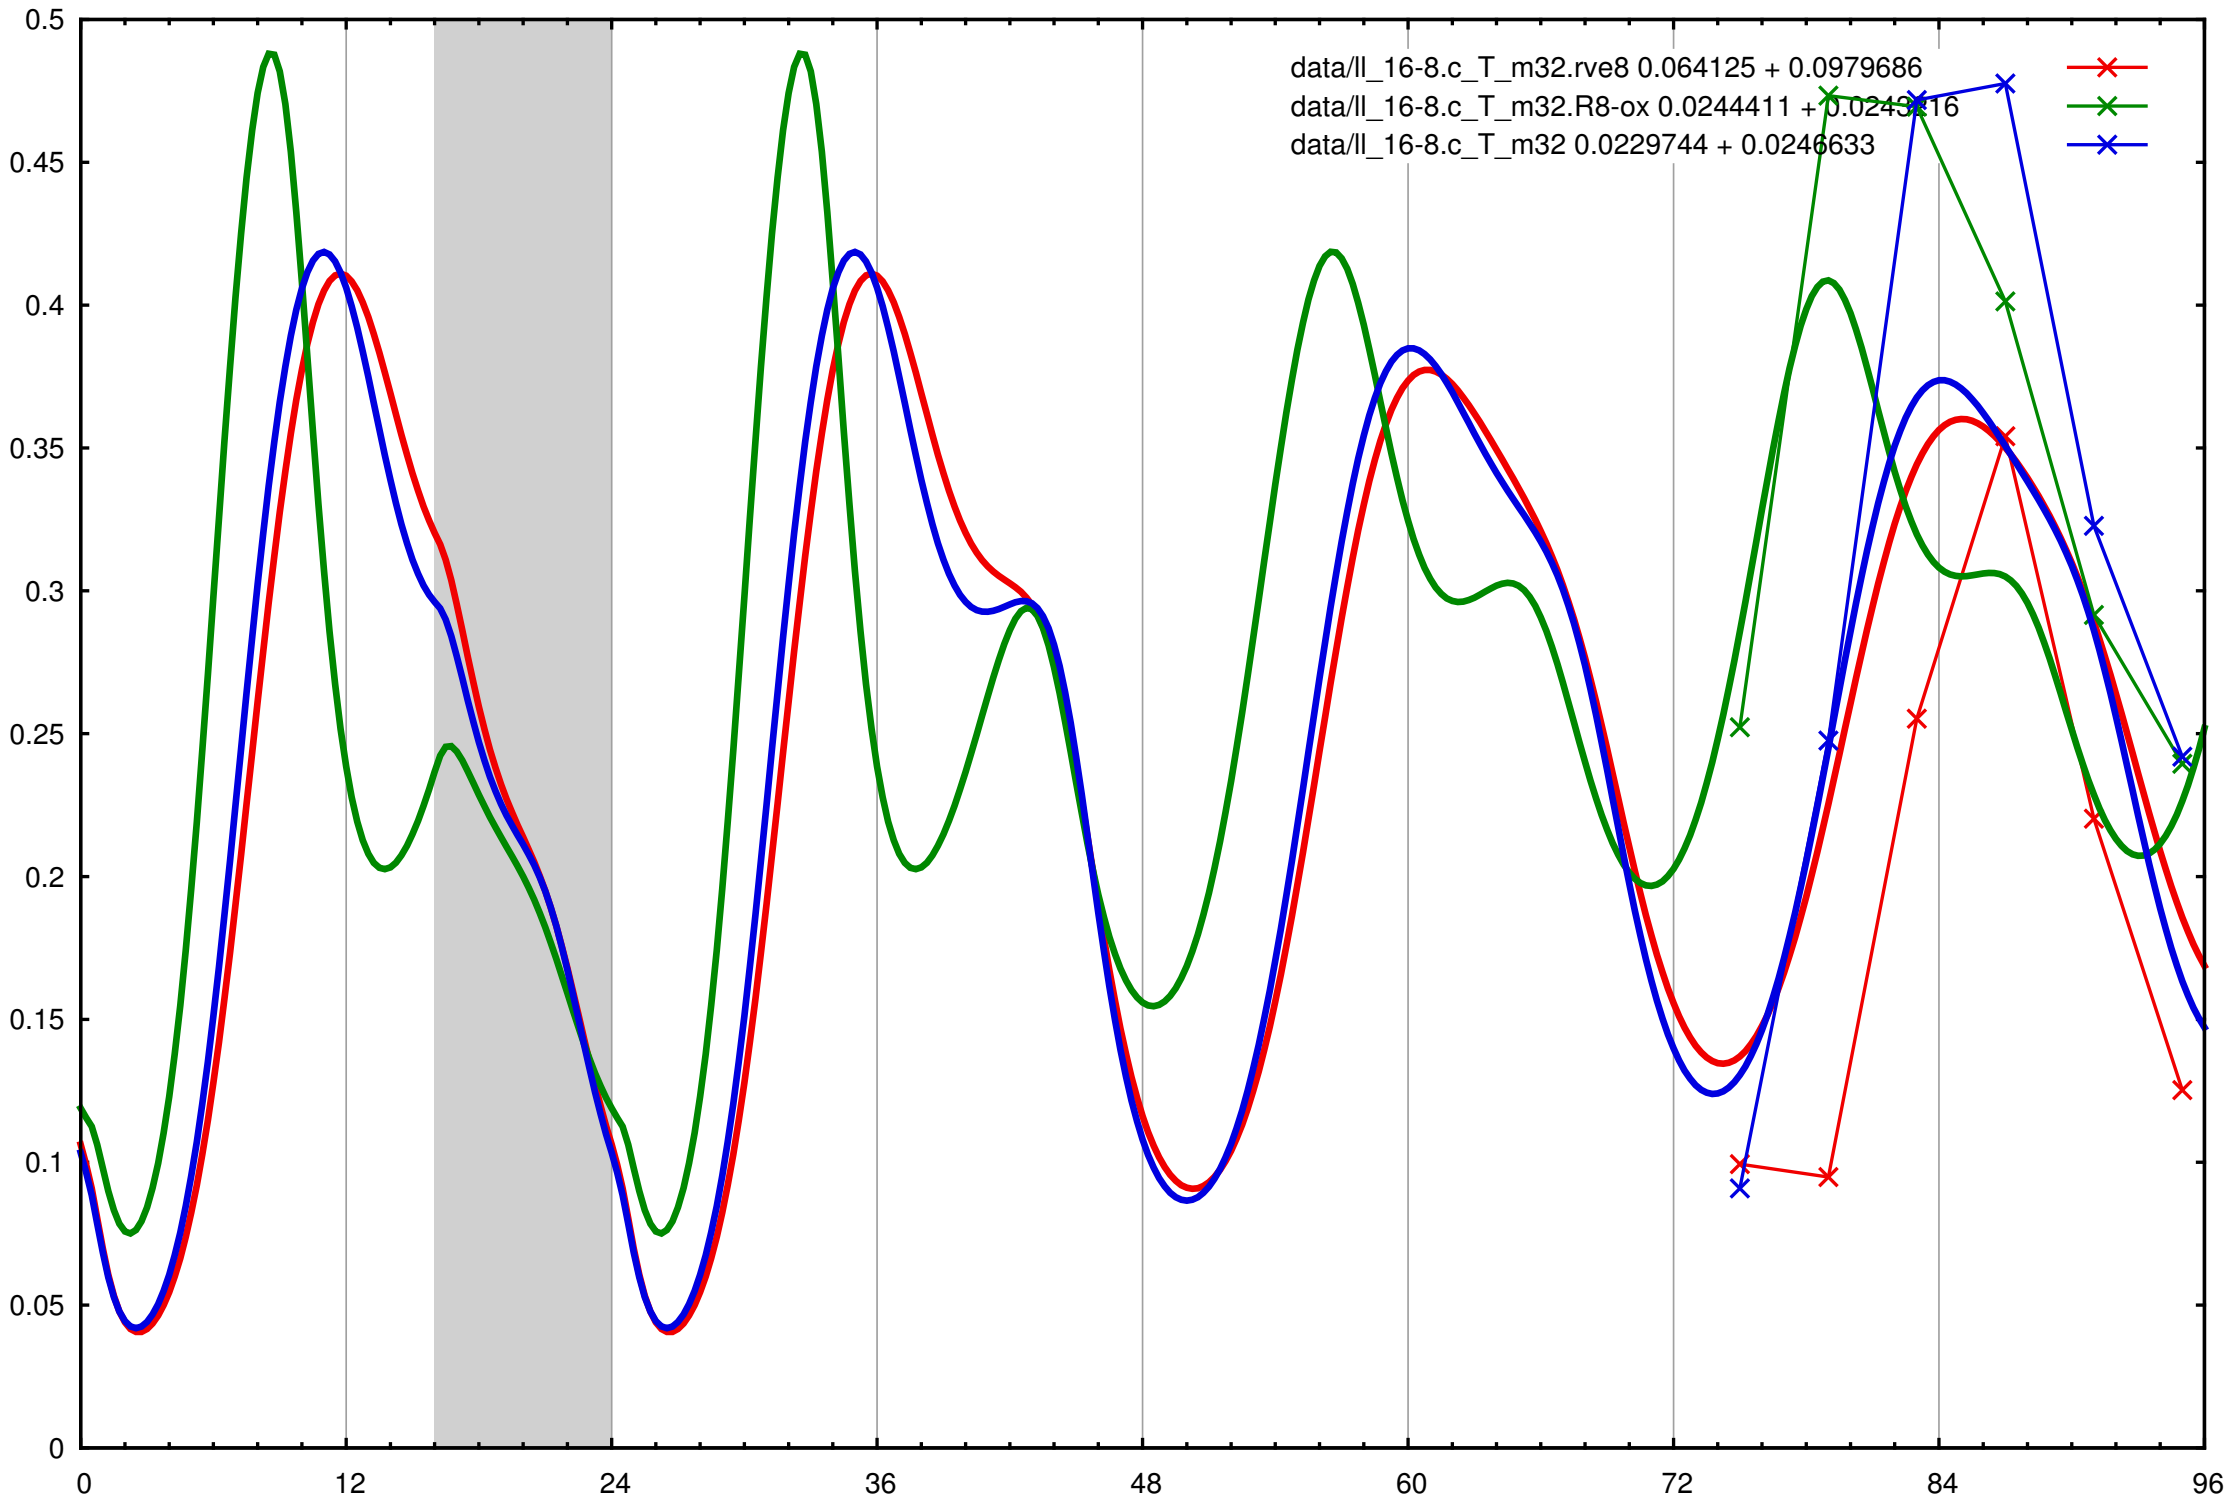

Scale group 292, scost 0.0401176

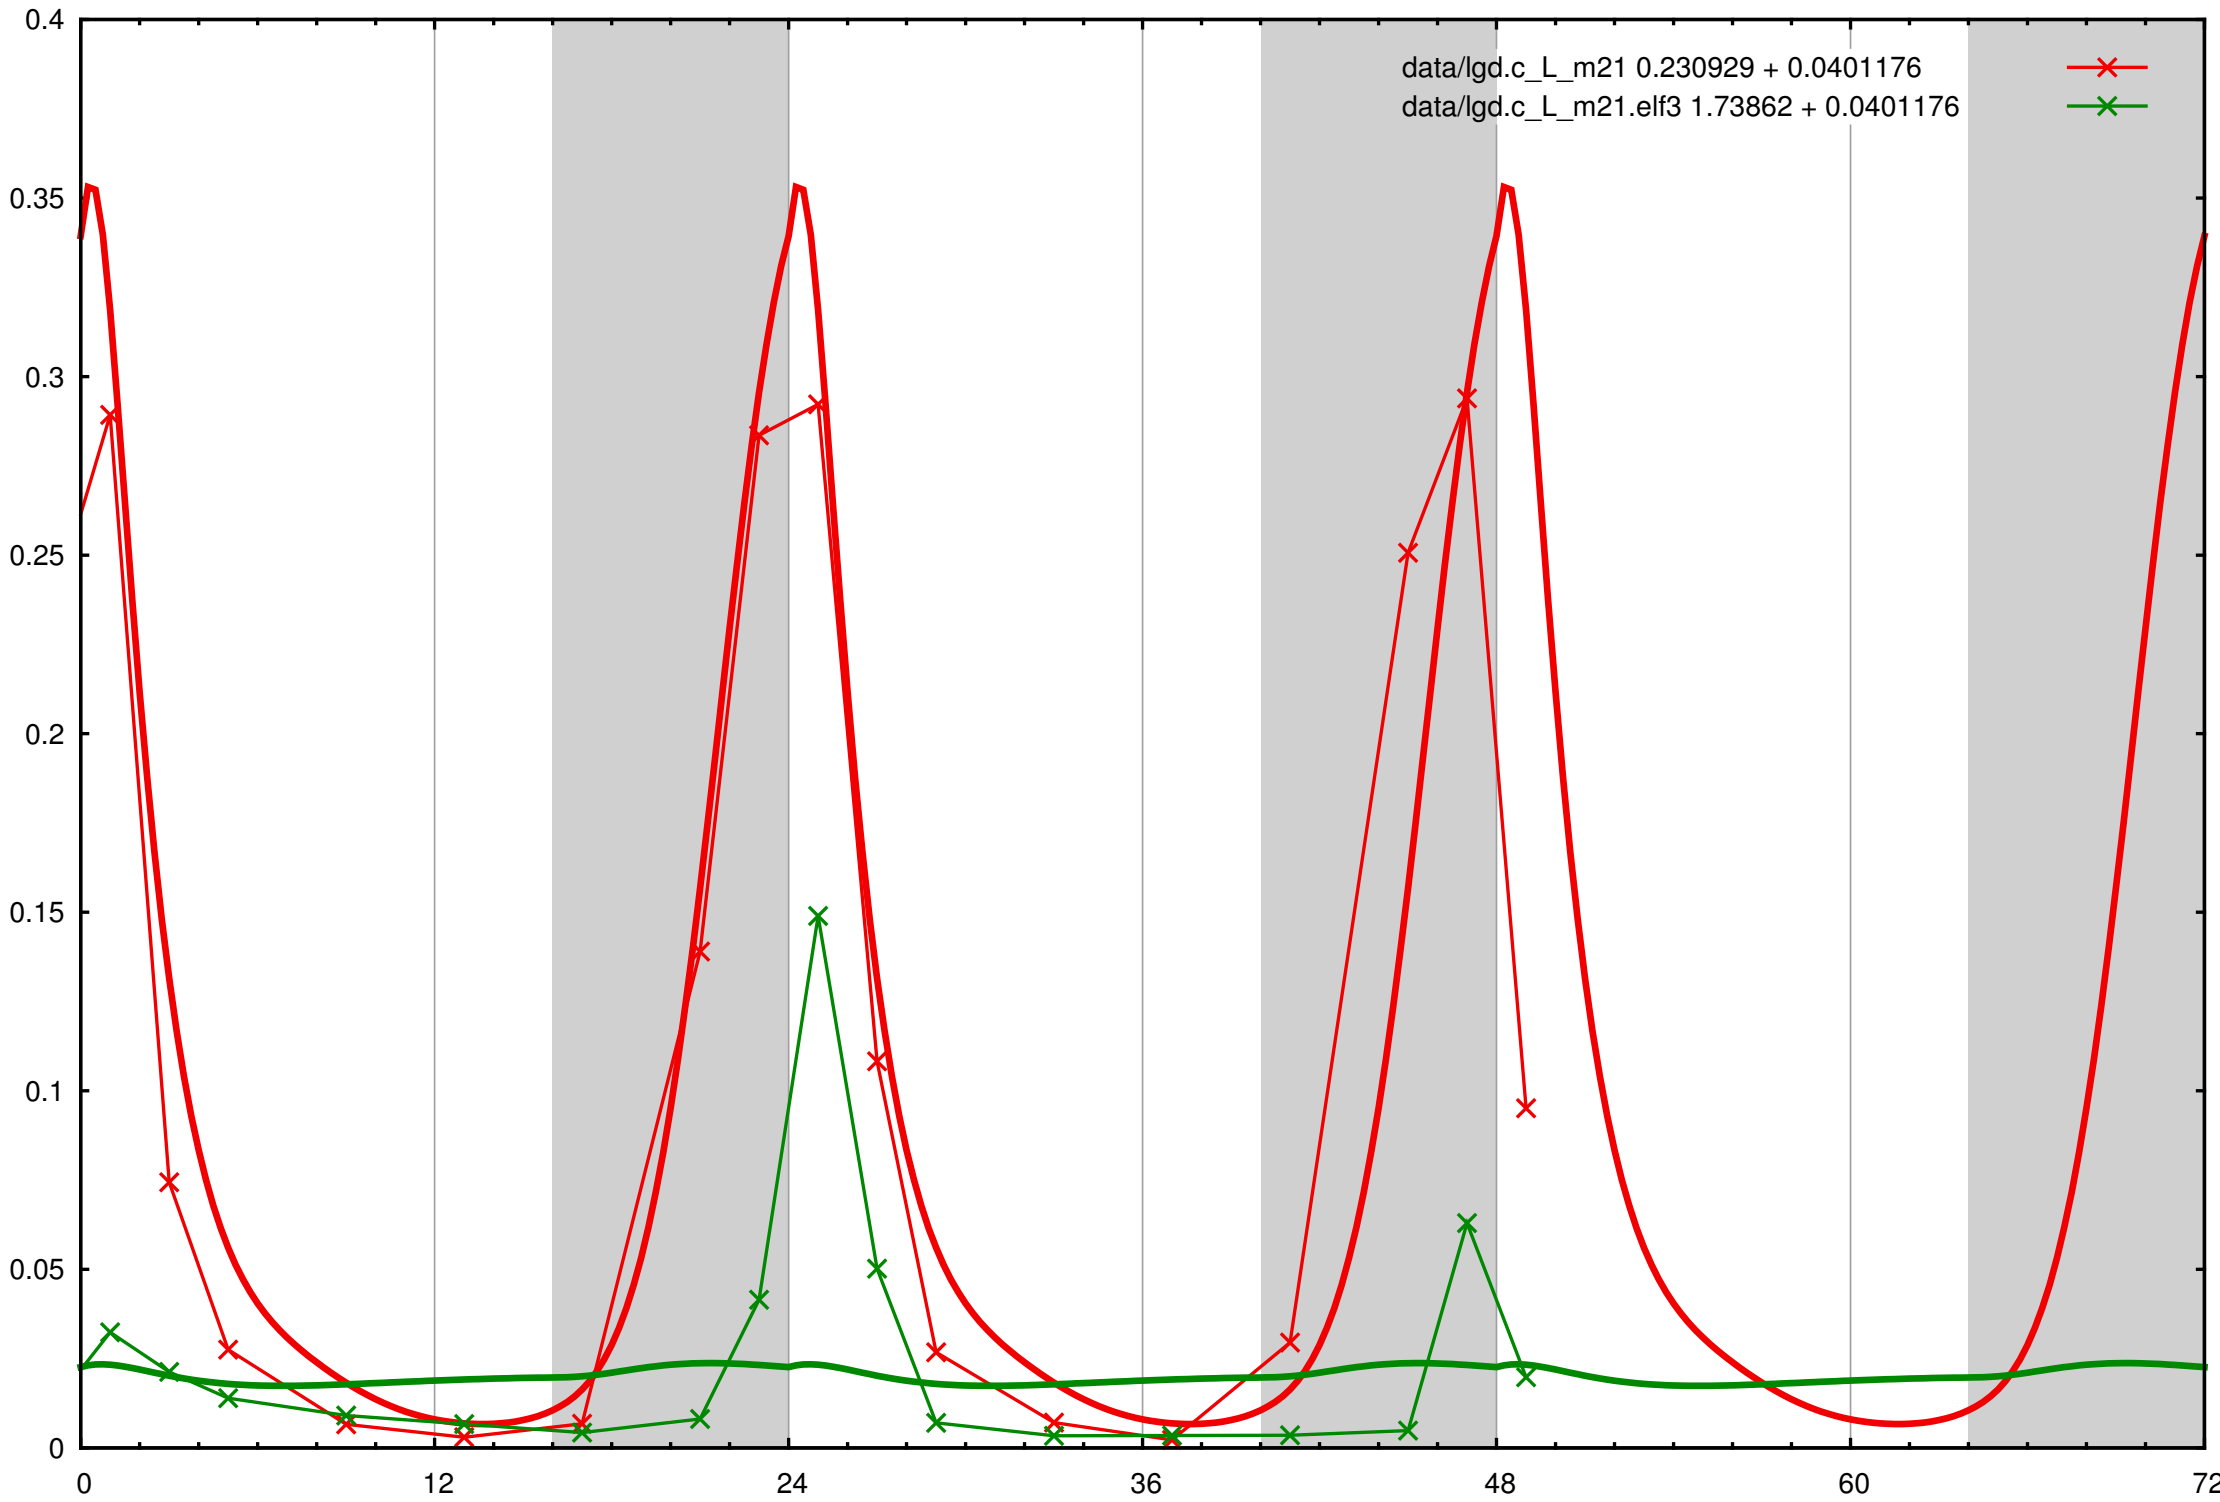

Scale group 293, scost 0.213686

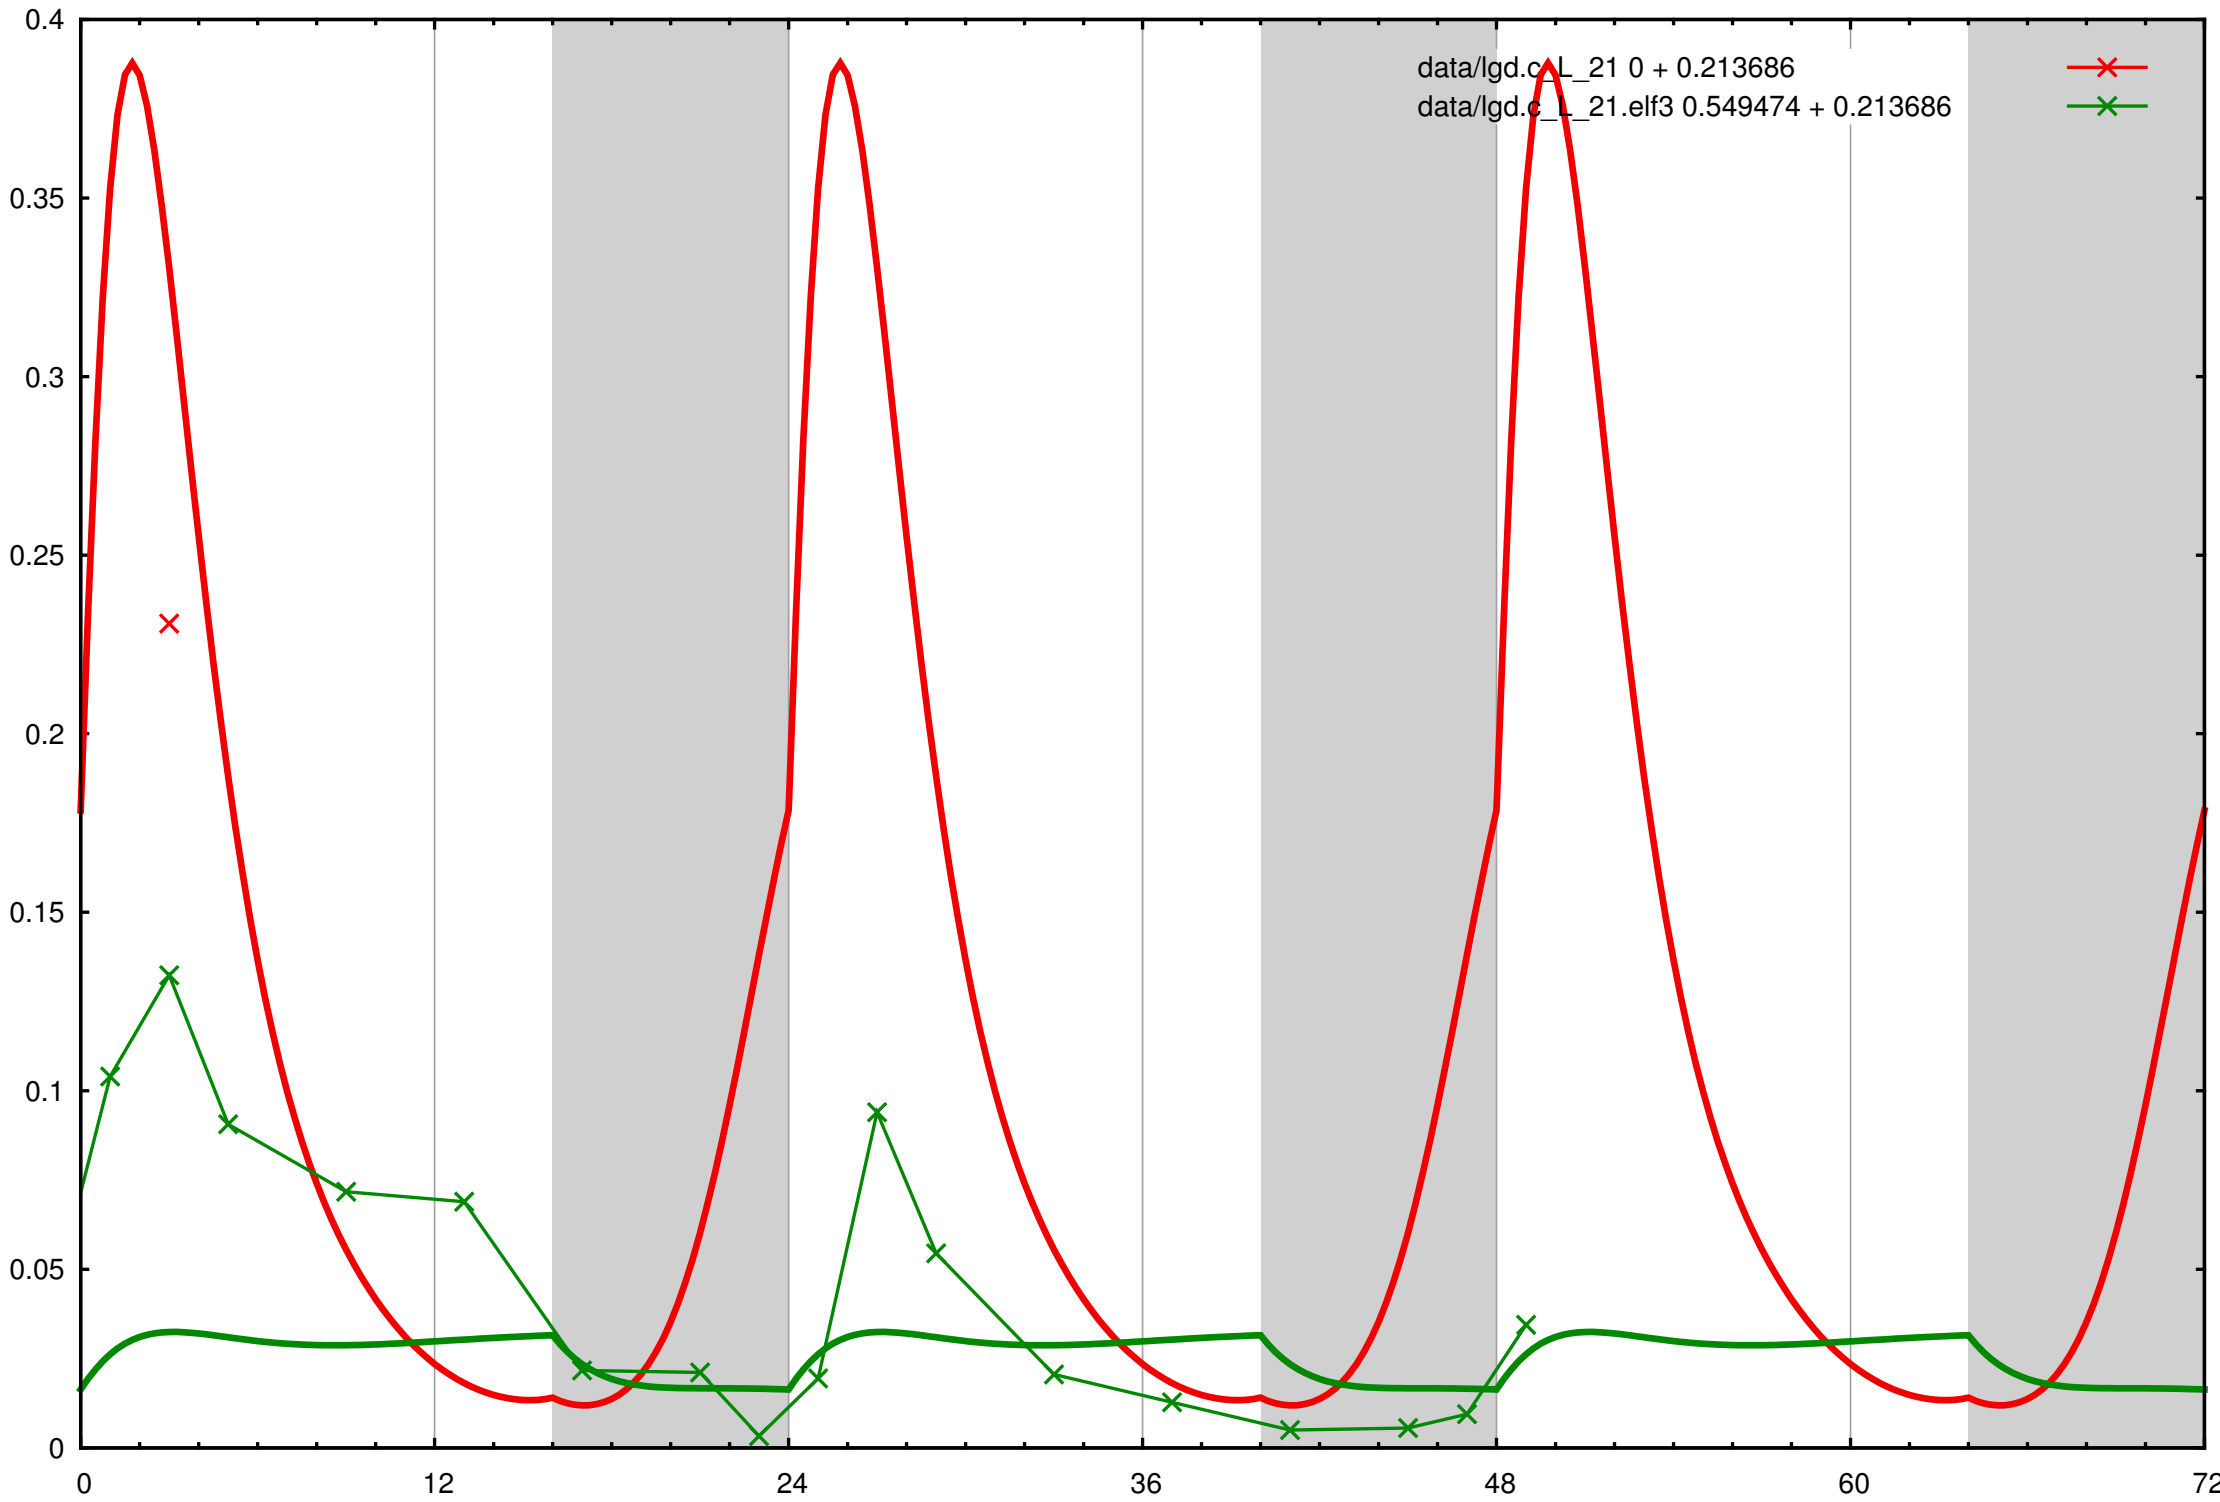

Scale group 294, scost 0

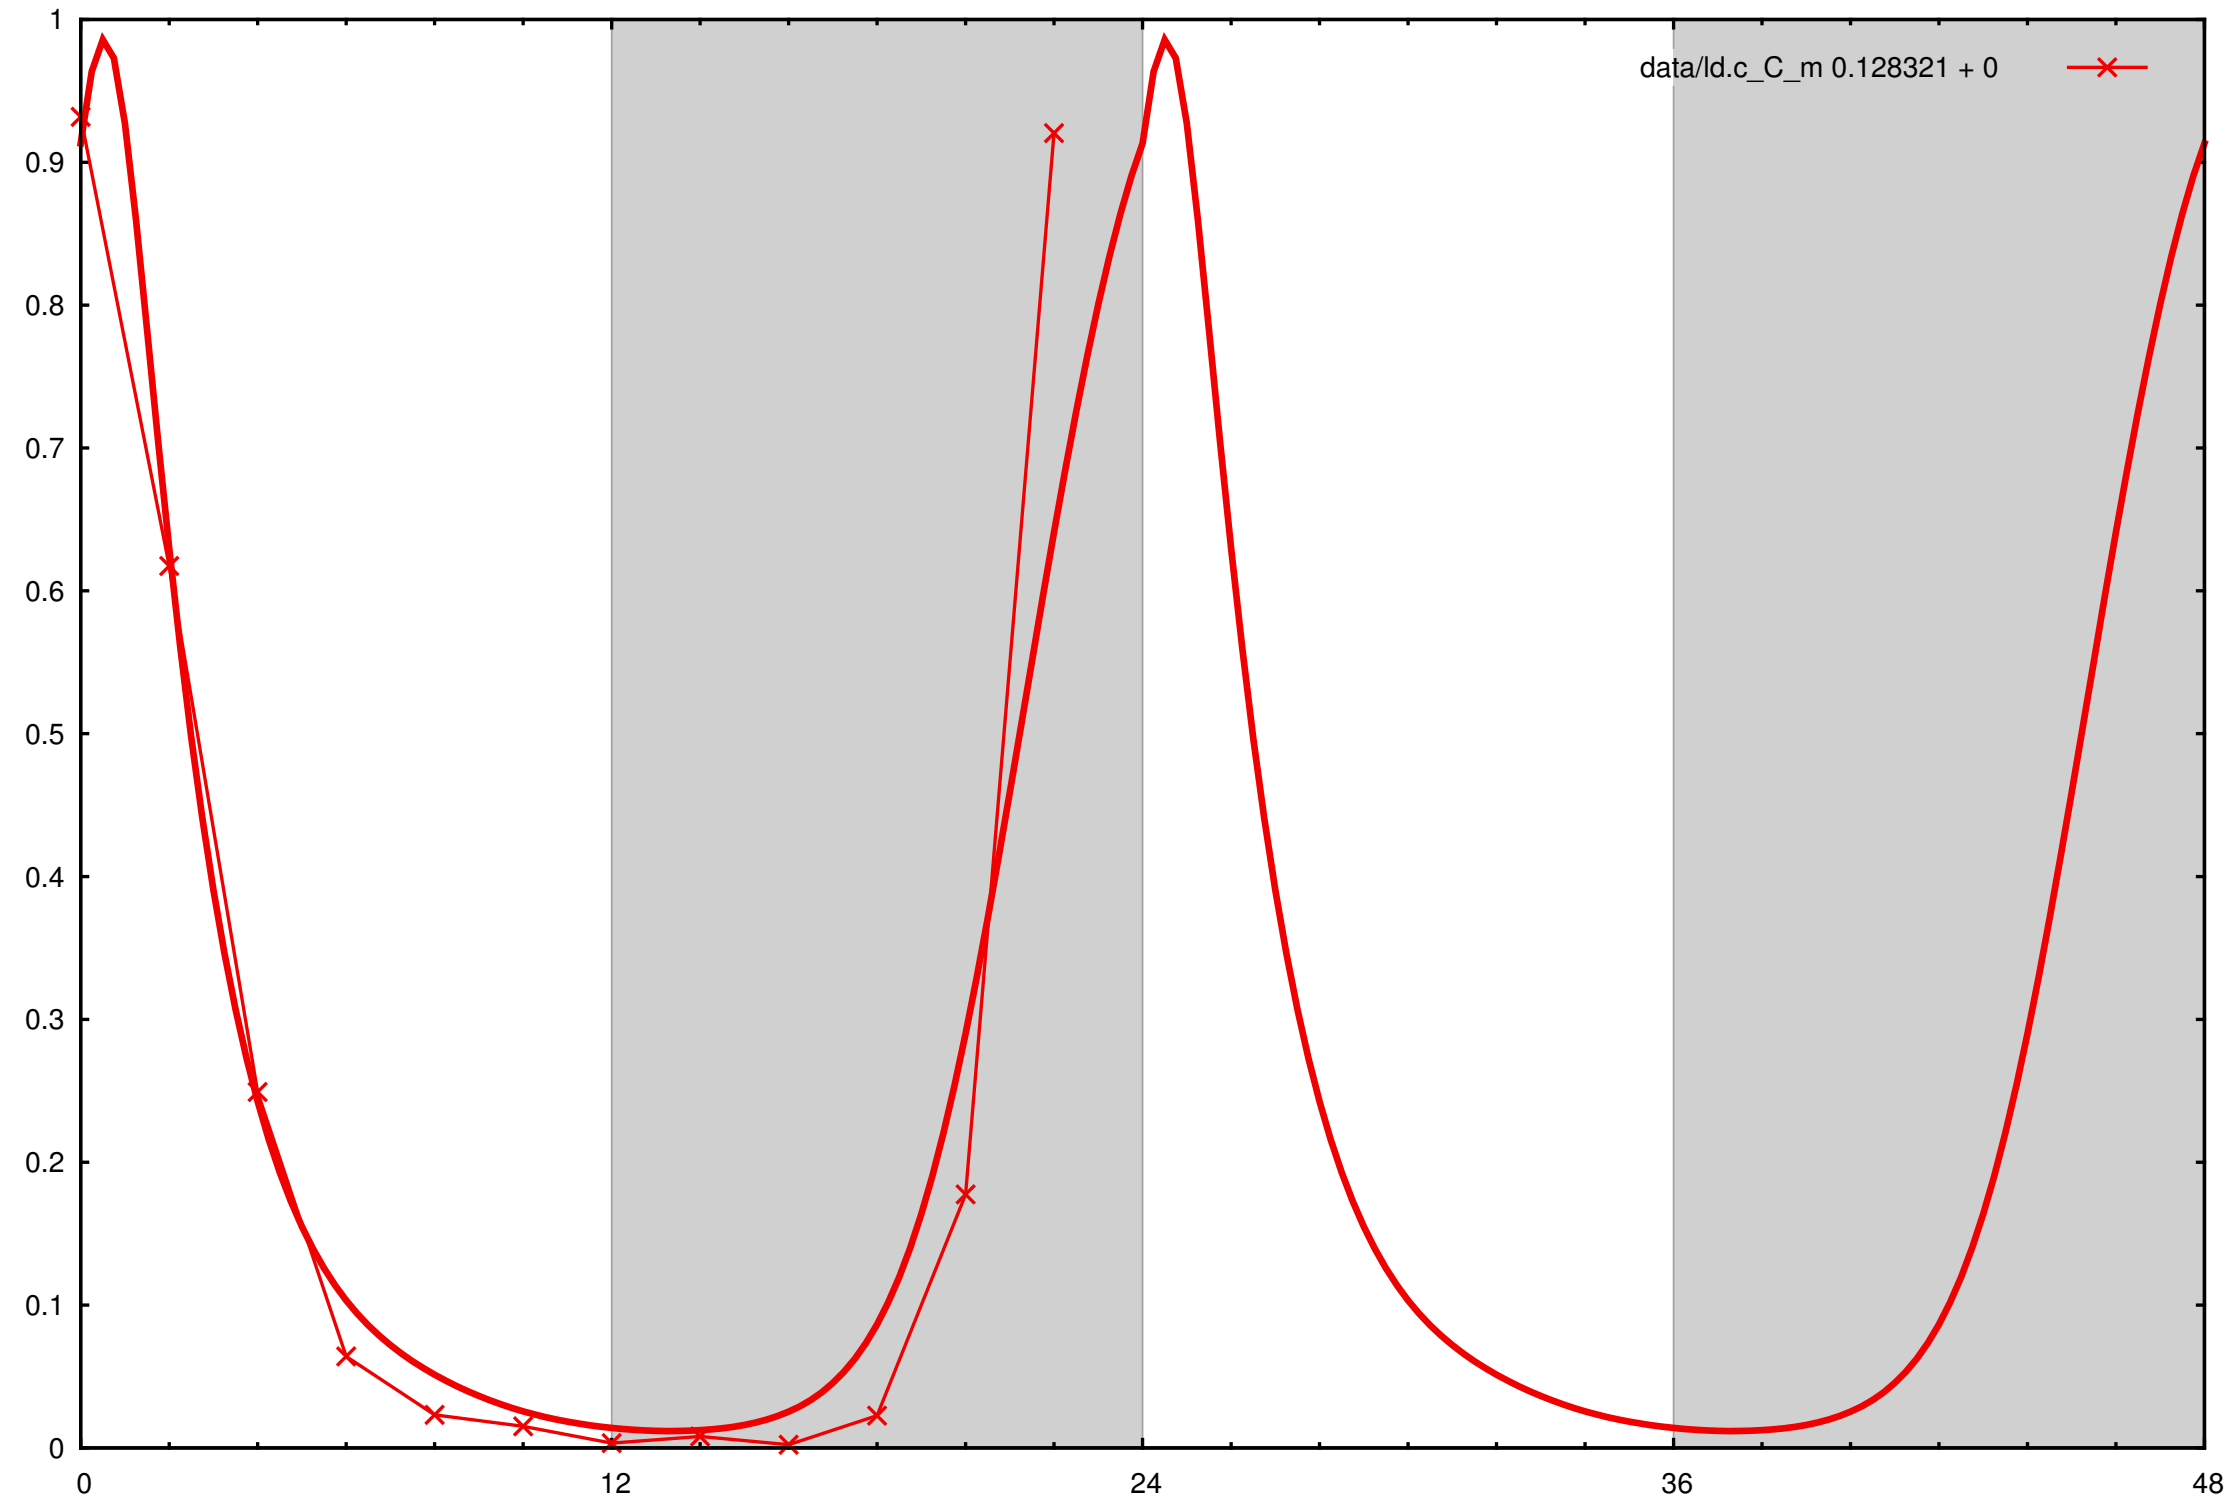

Scale group 295, scost 0

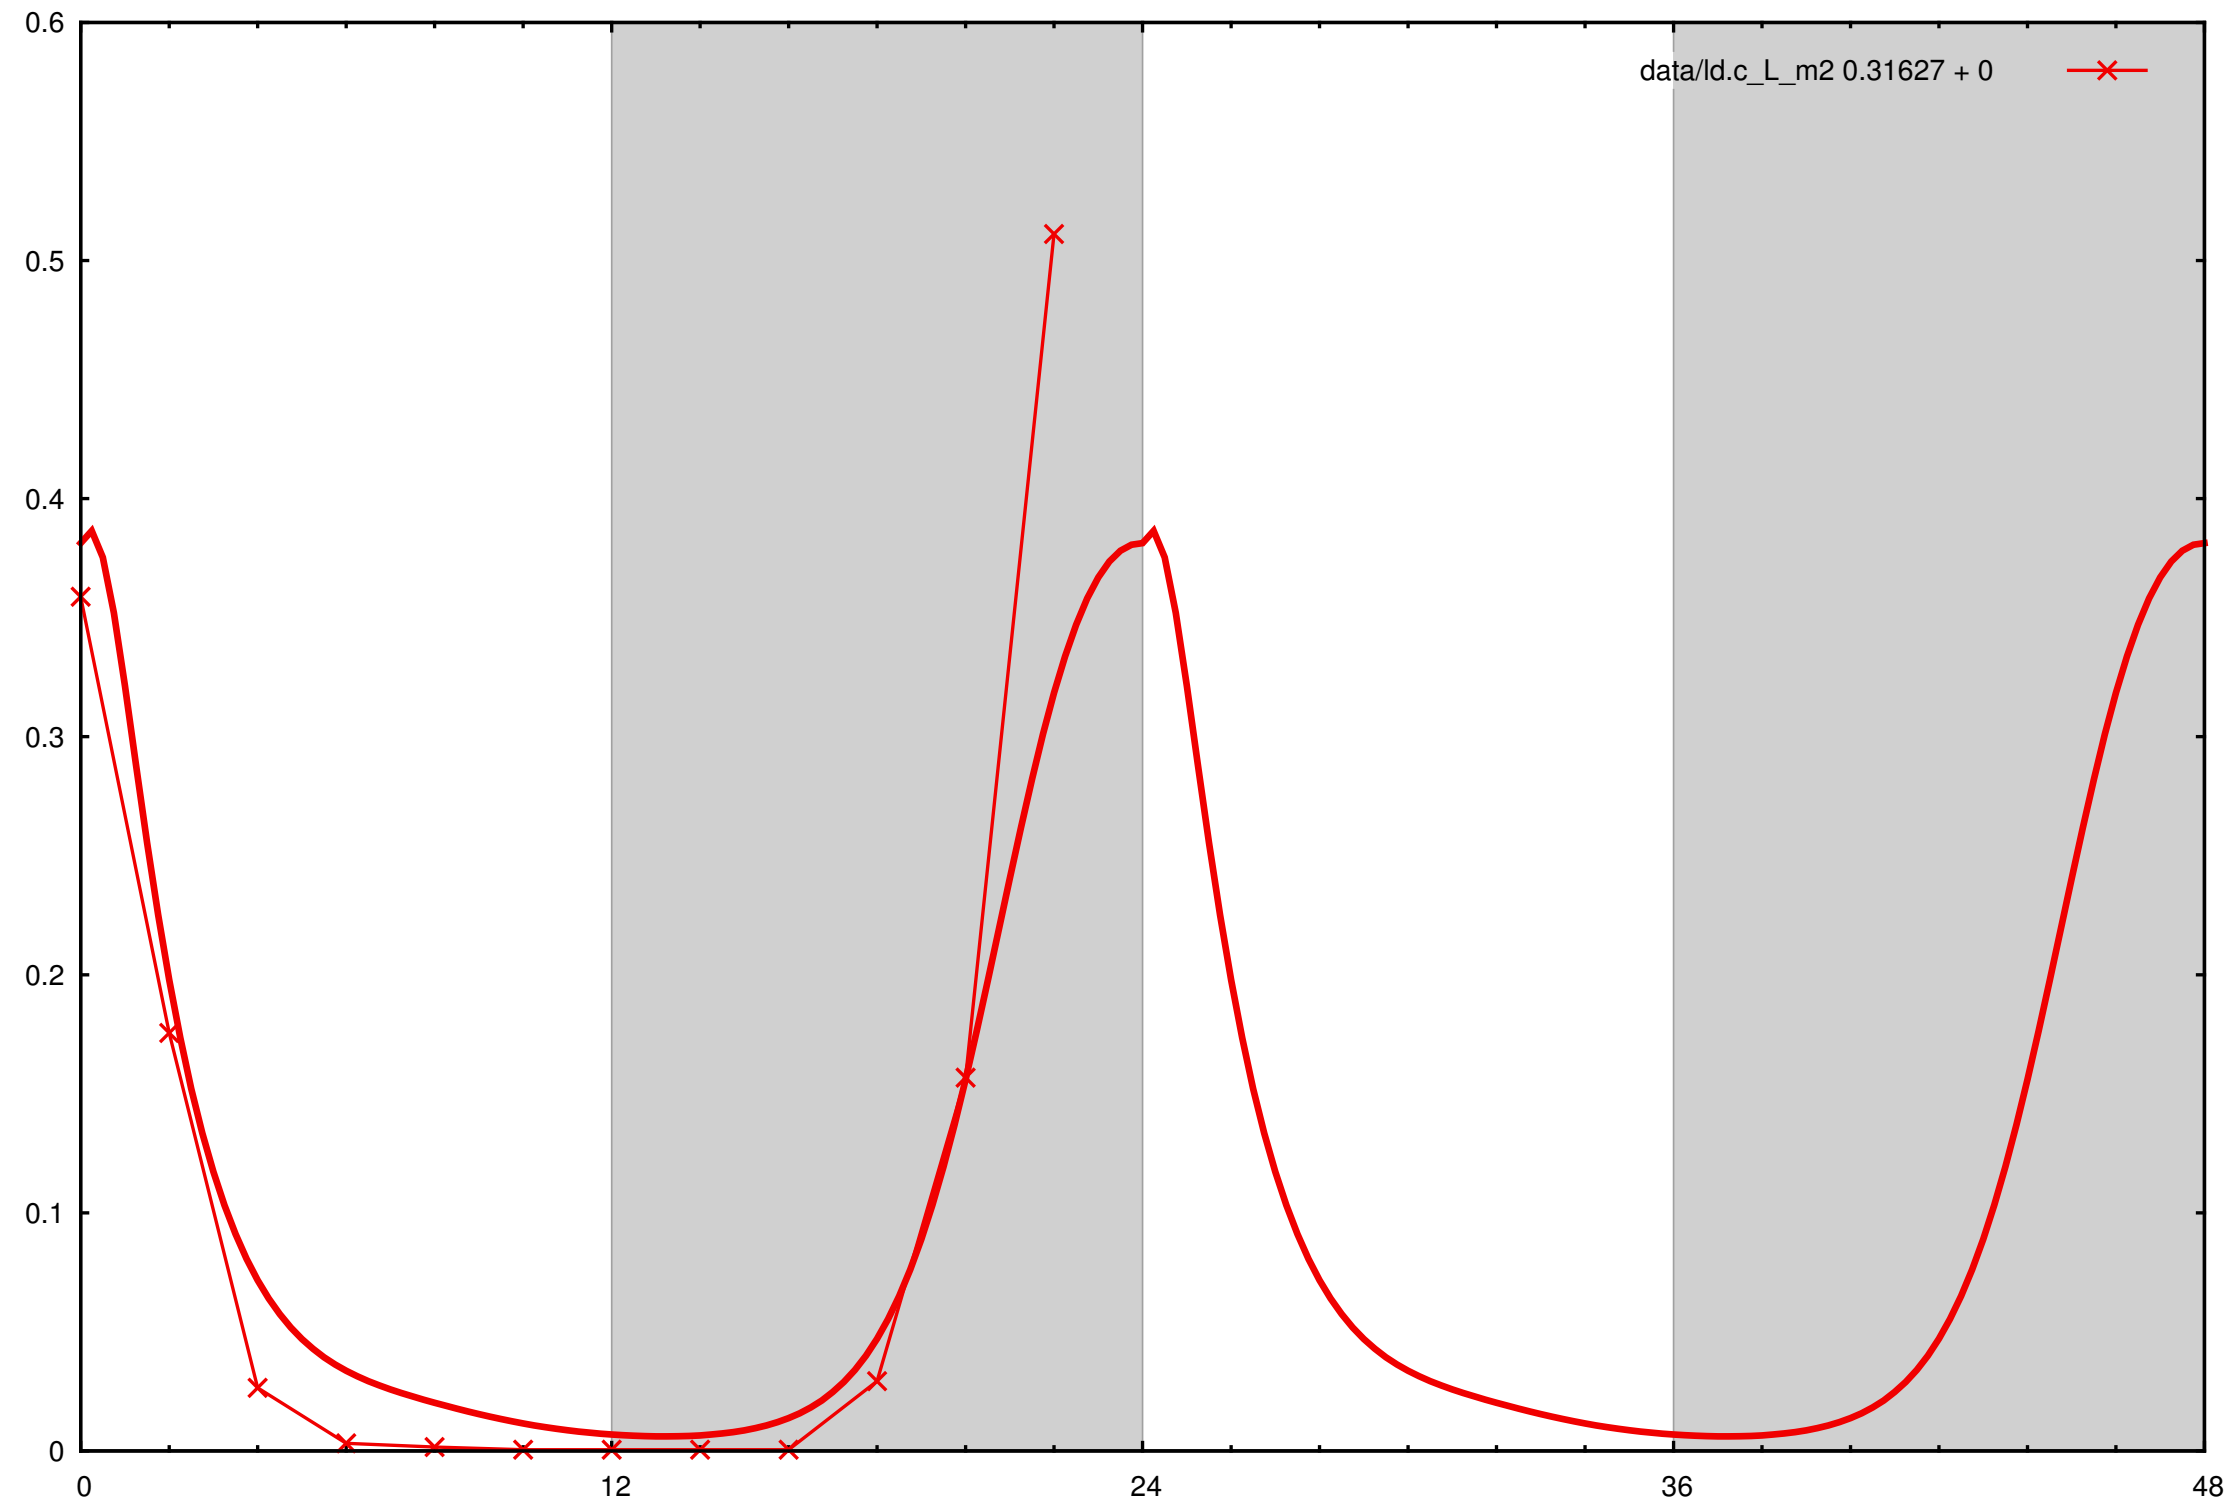

Scale group 296, scost 0

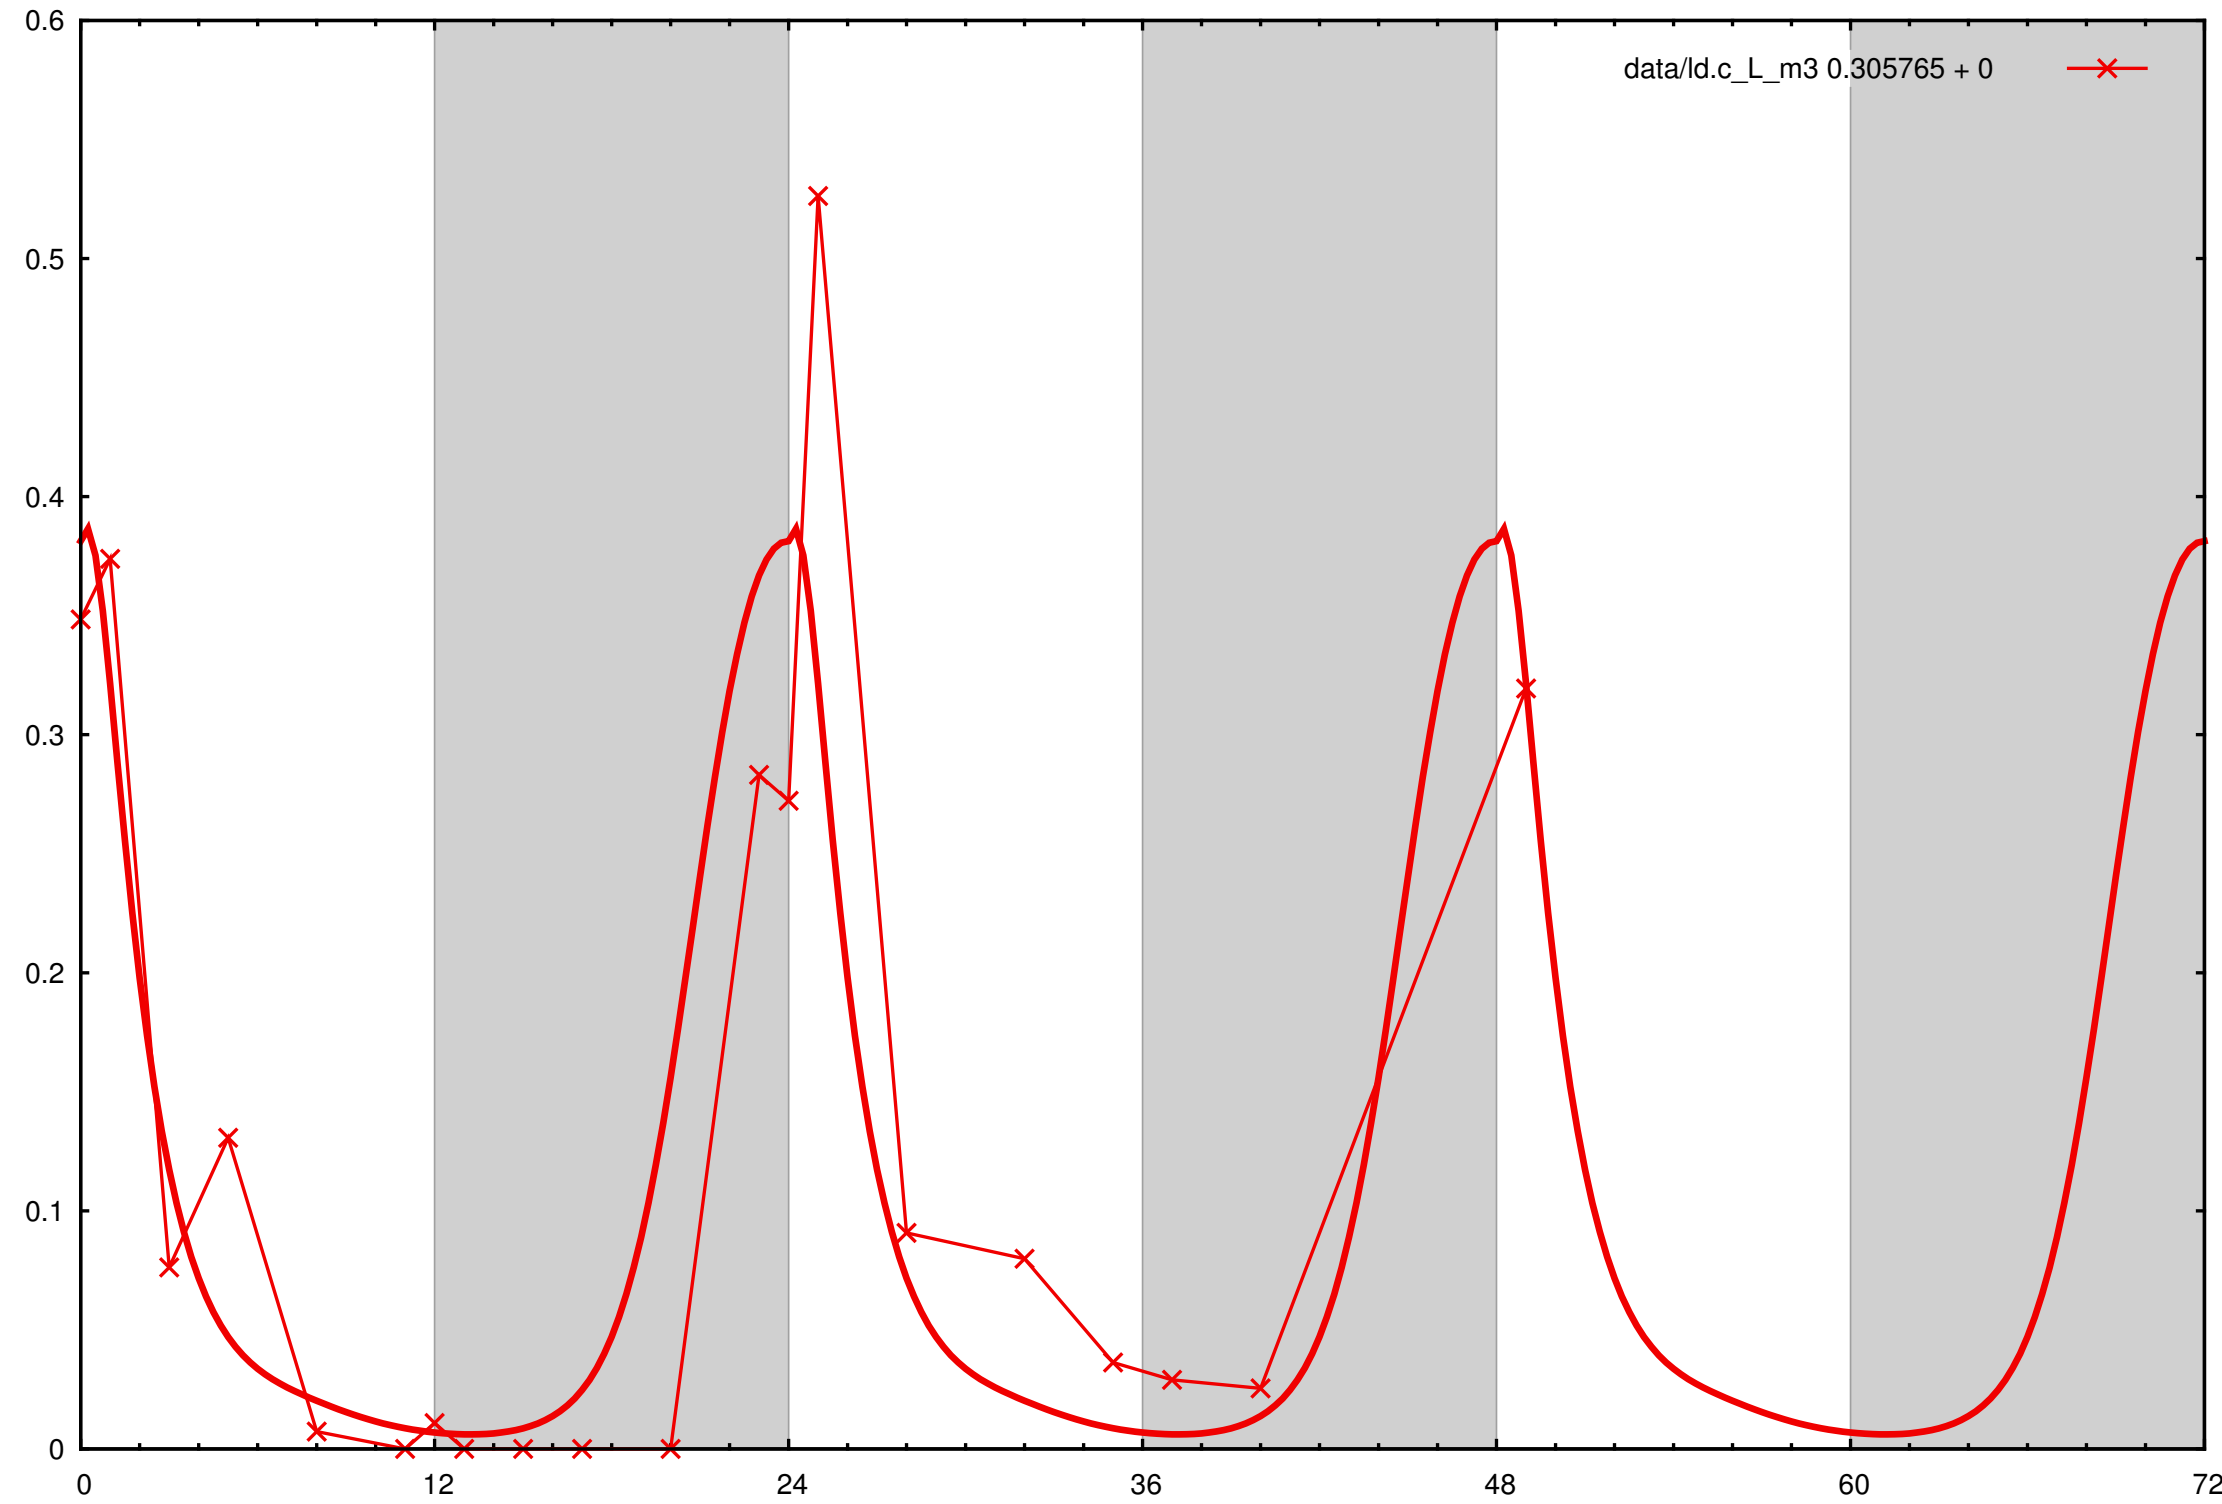



Scale group 297, scost 0

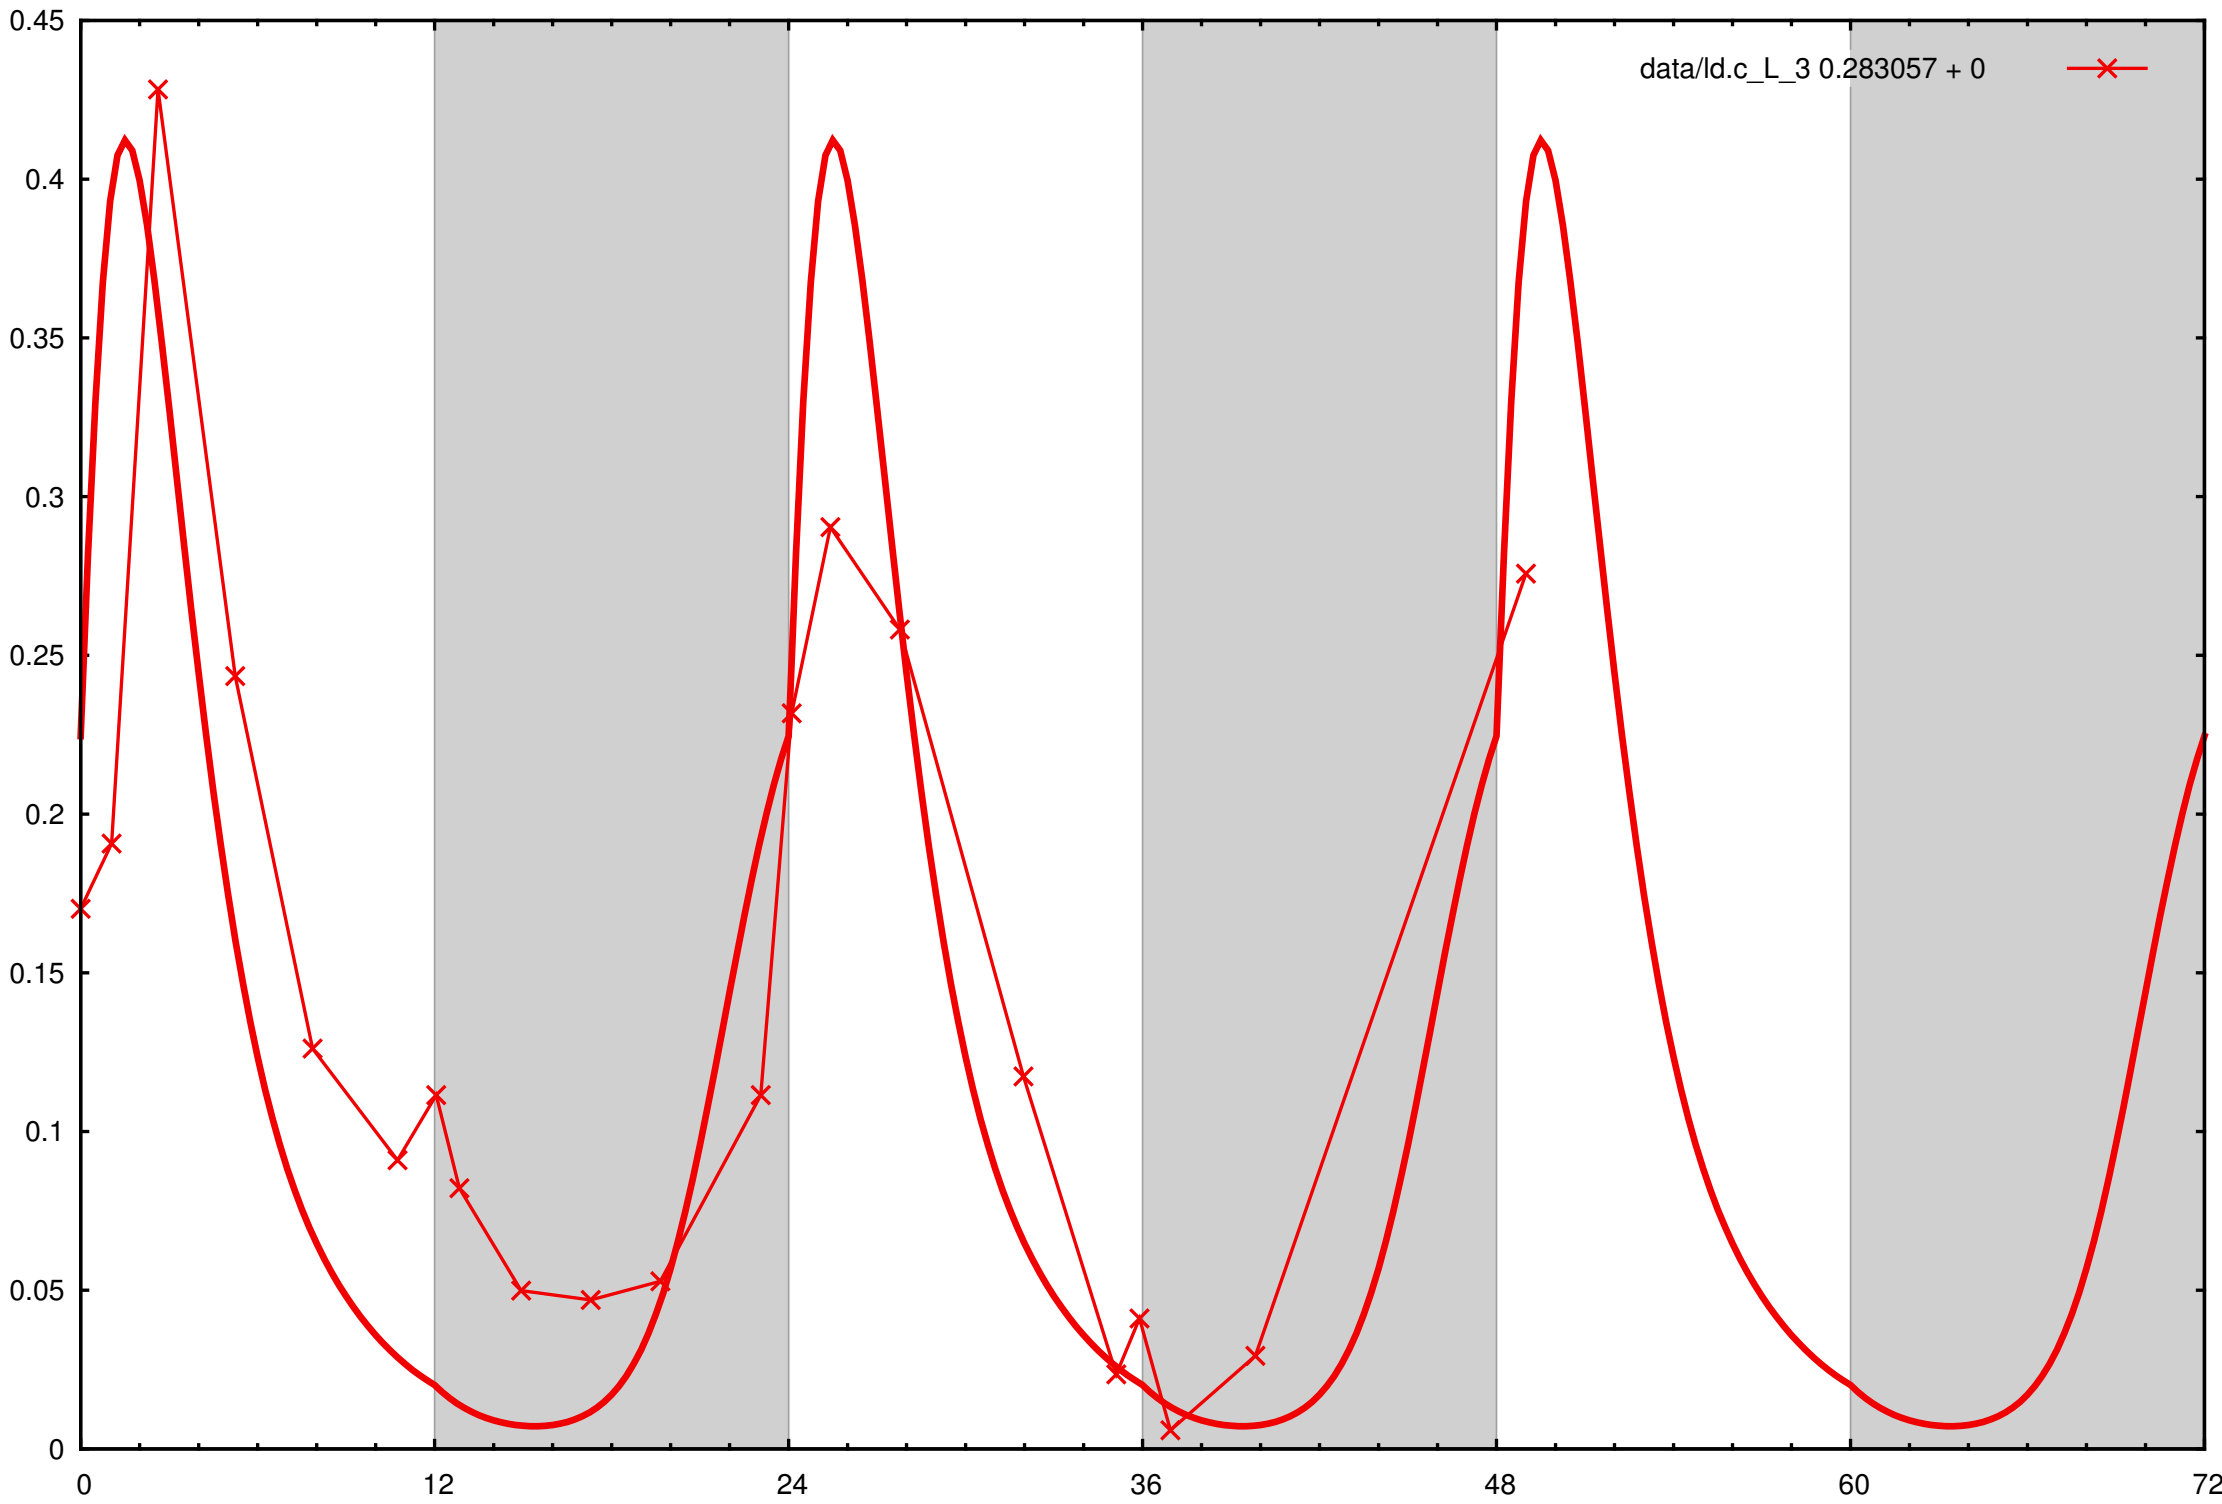

Scale group 298, scost 0

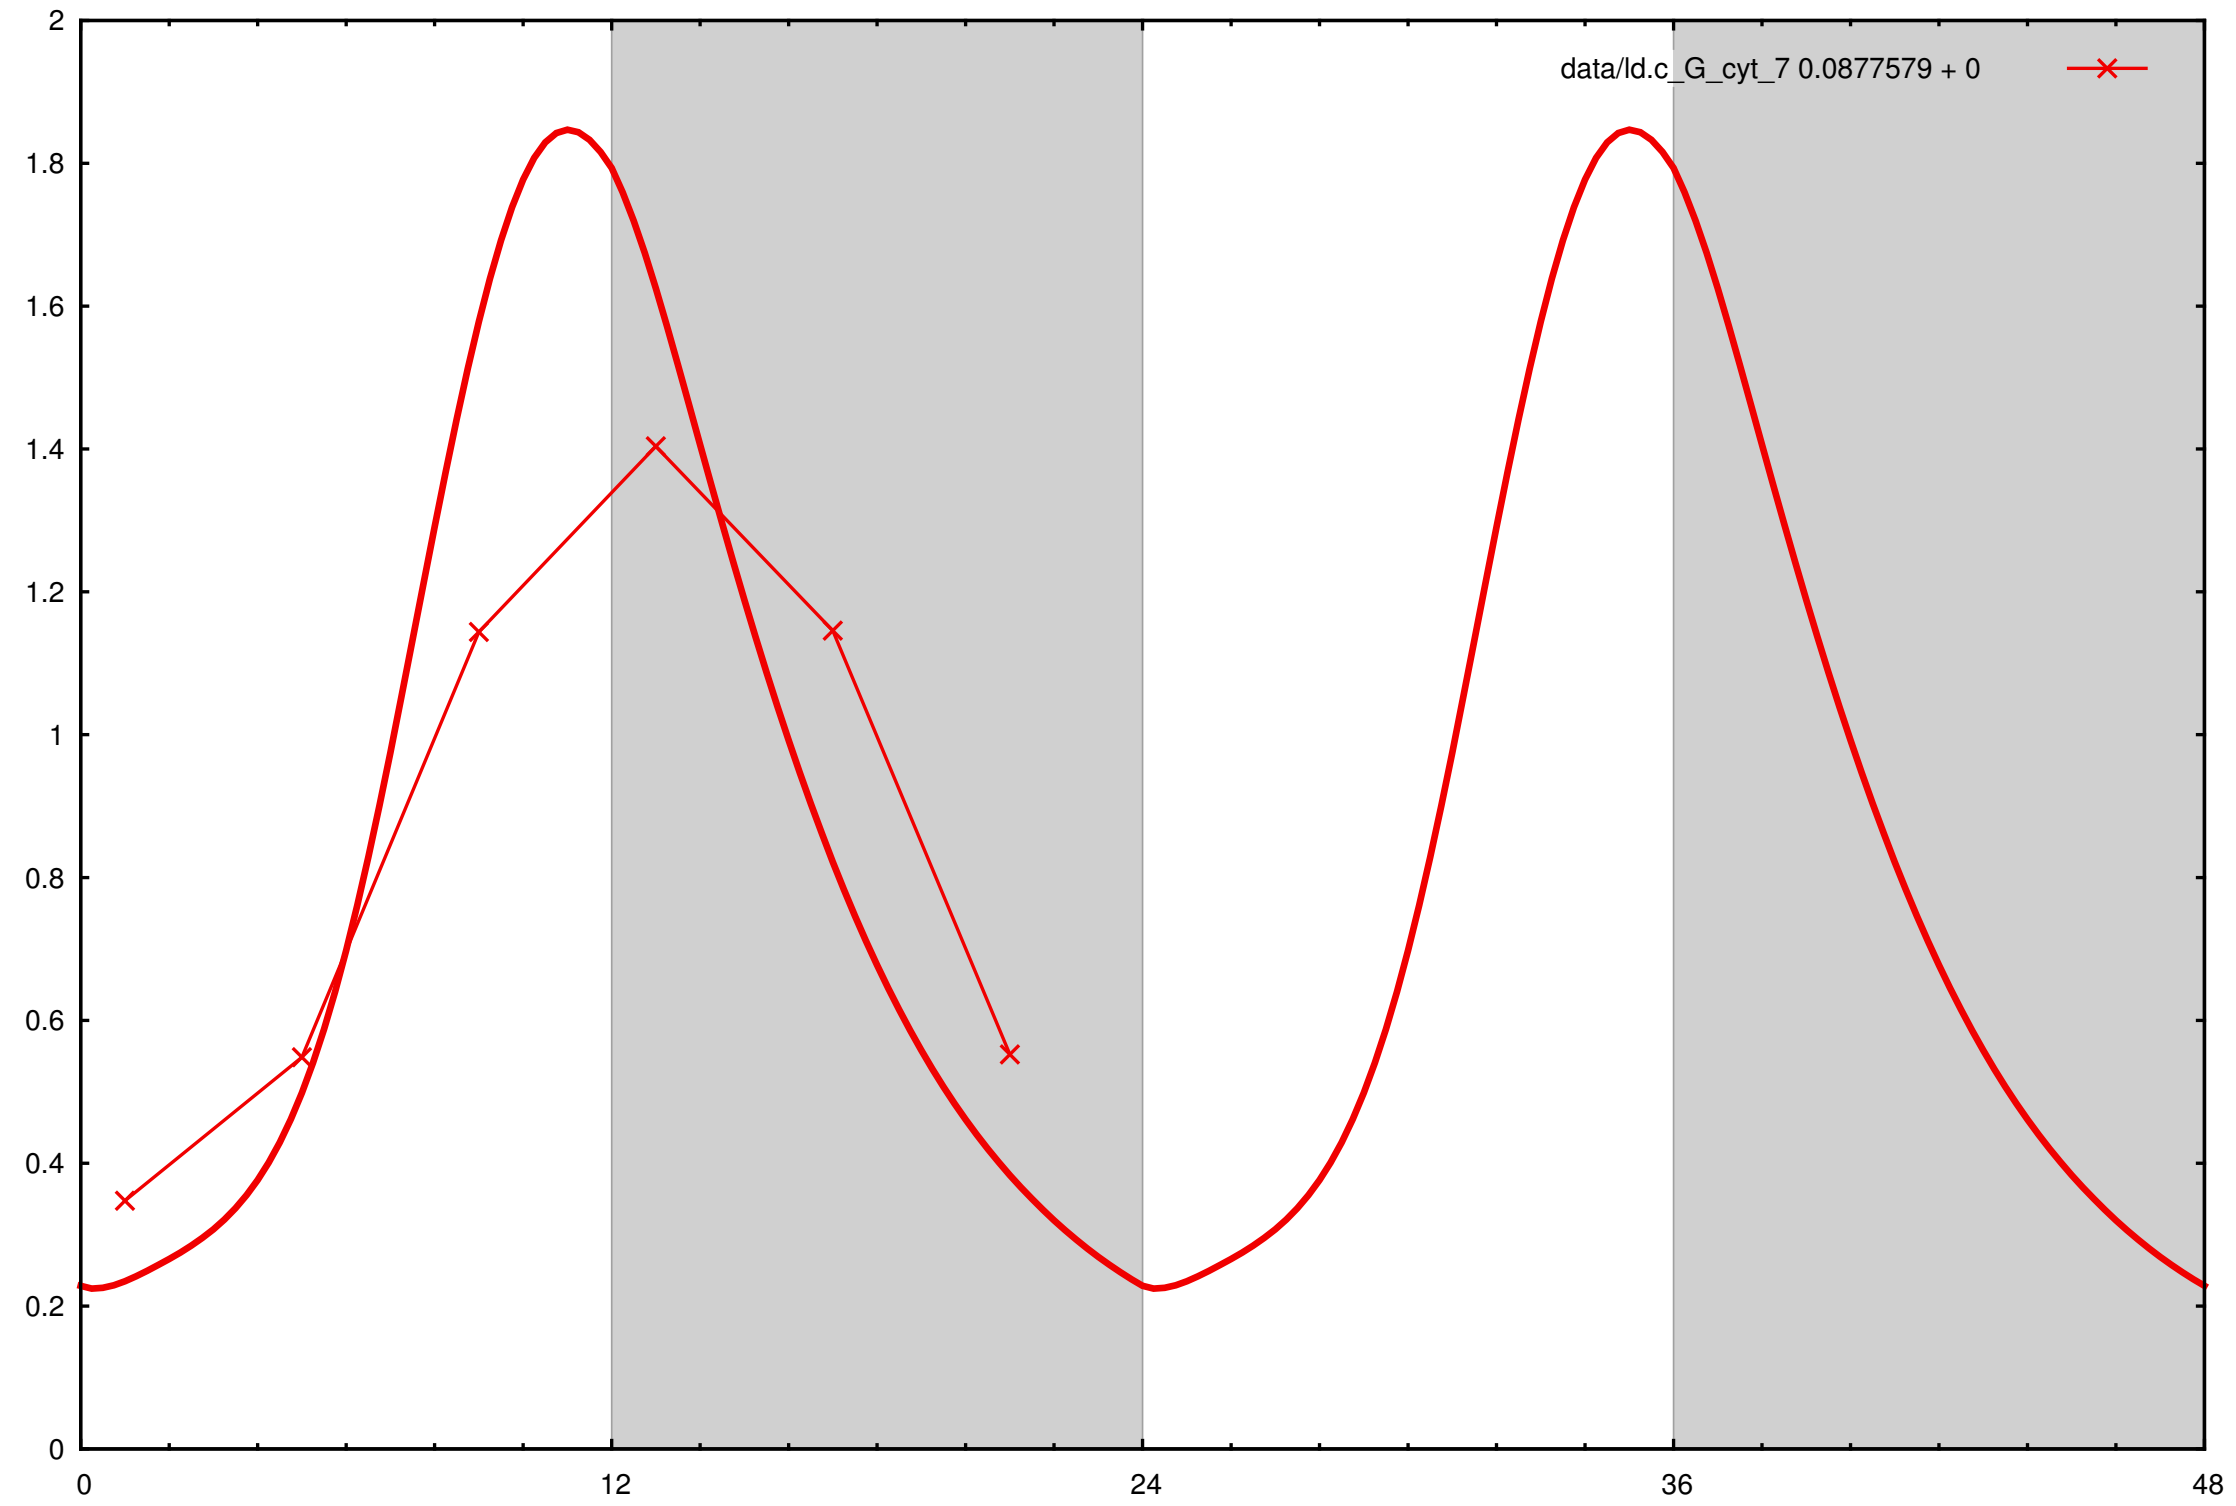

Scale group 299, scost 0

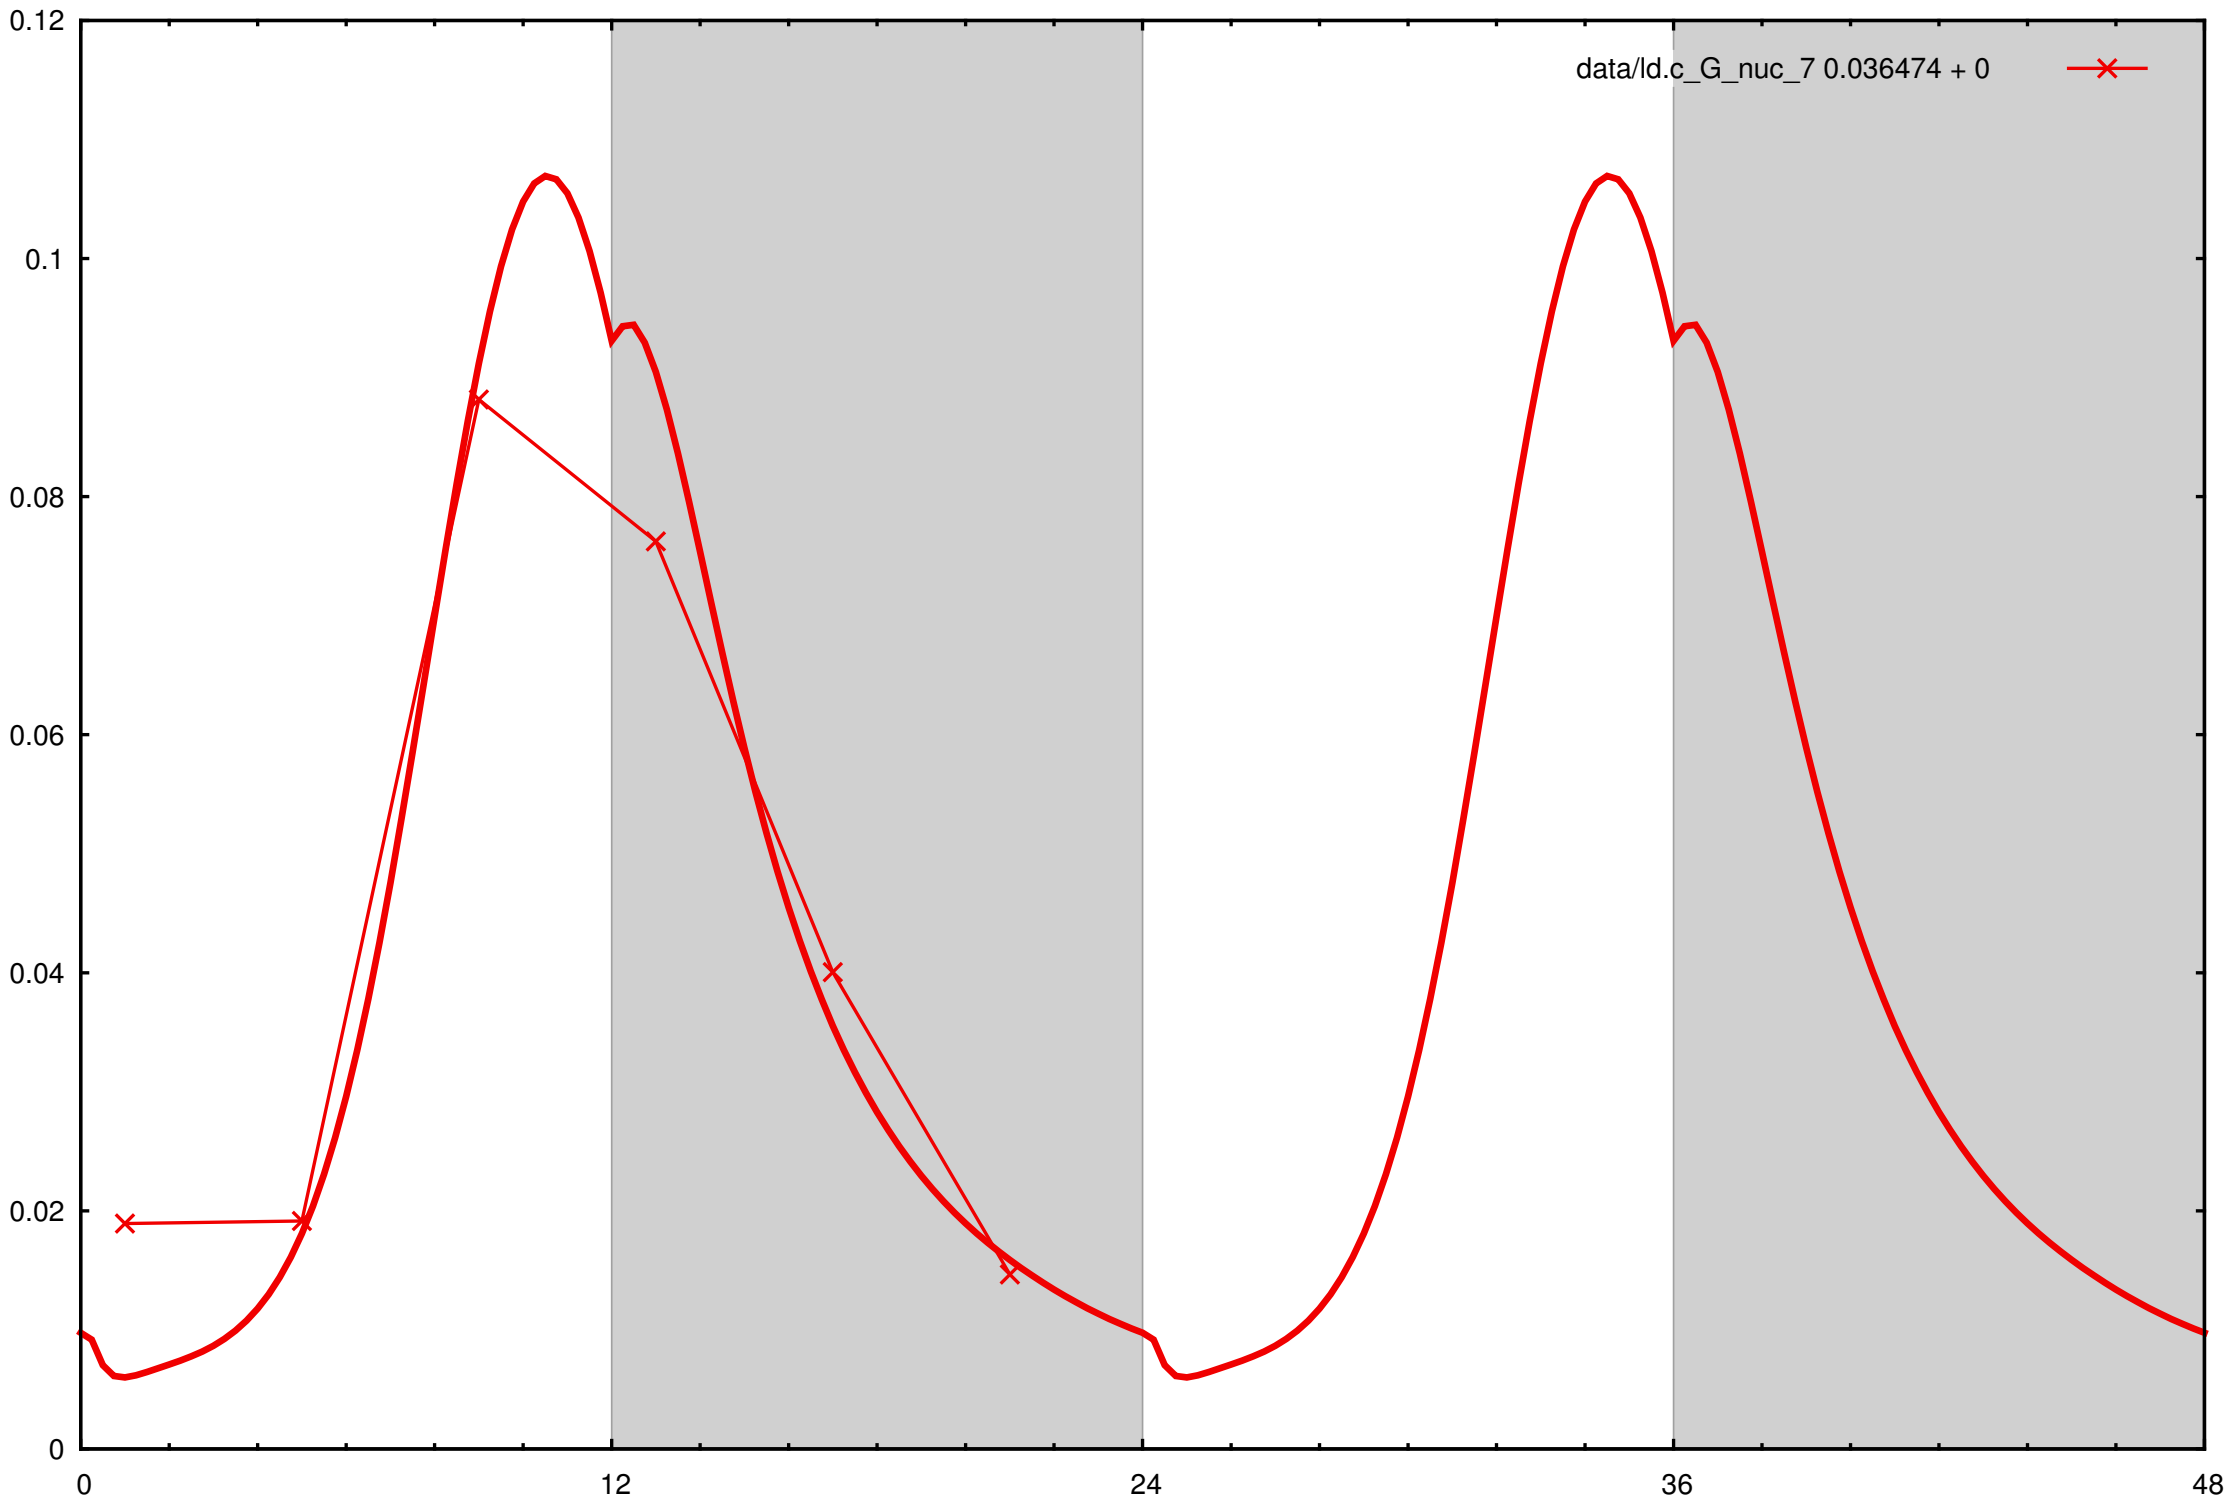

Scale group 300, scost 0

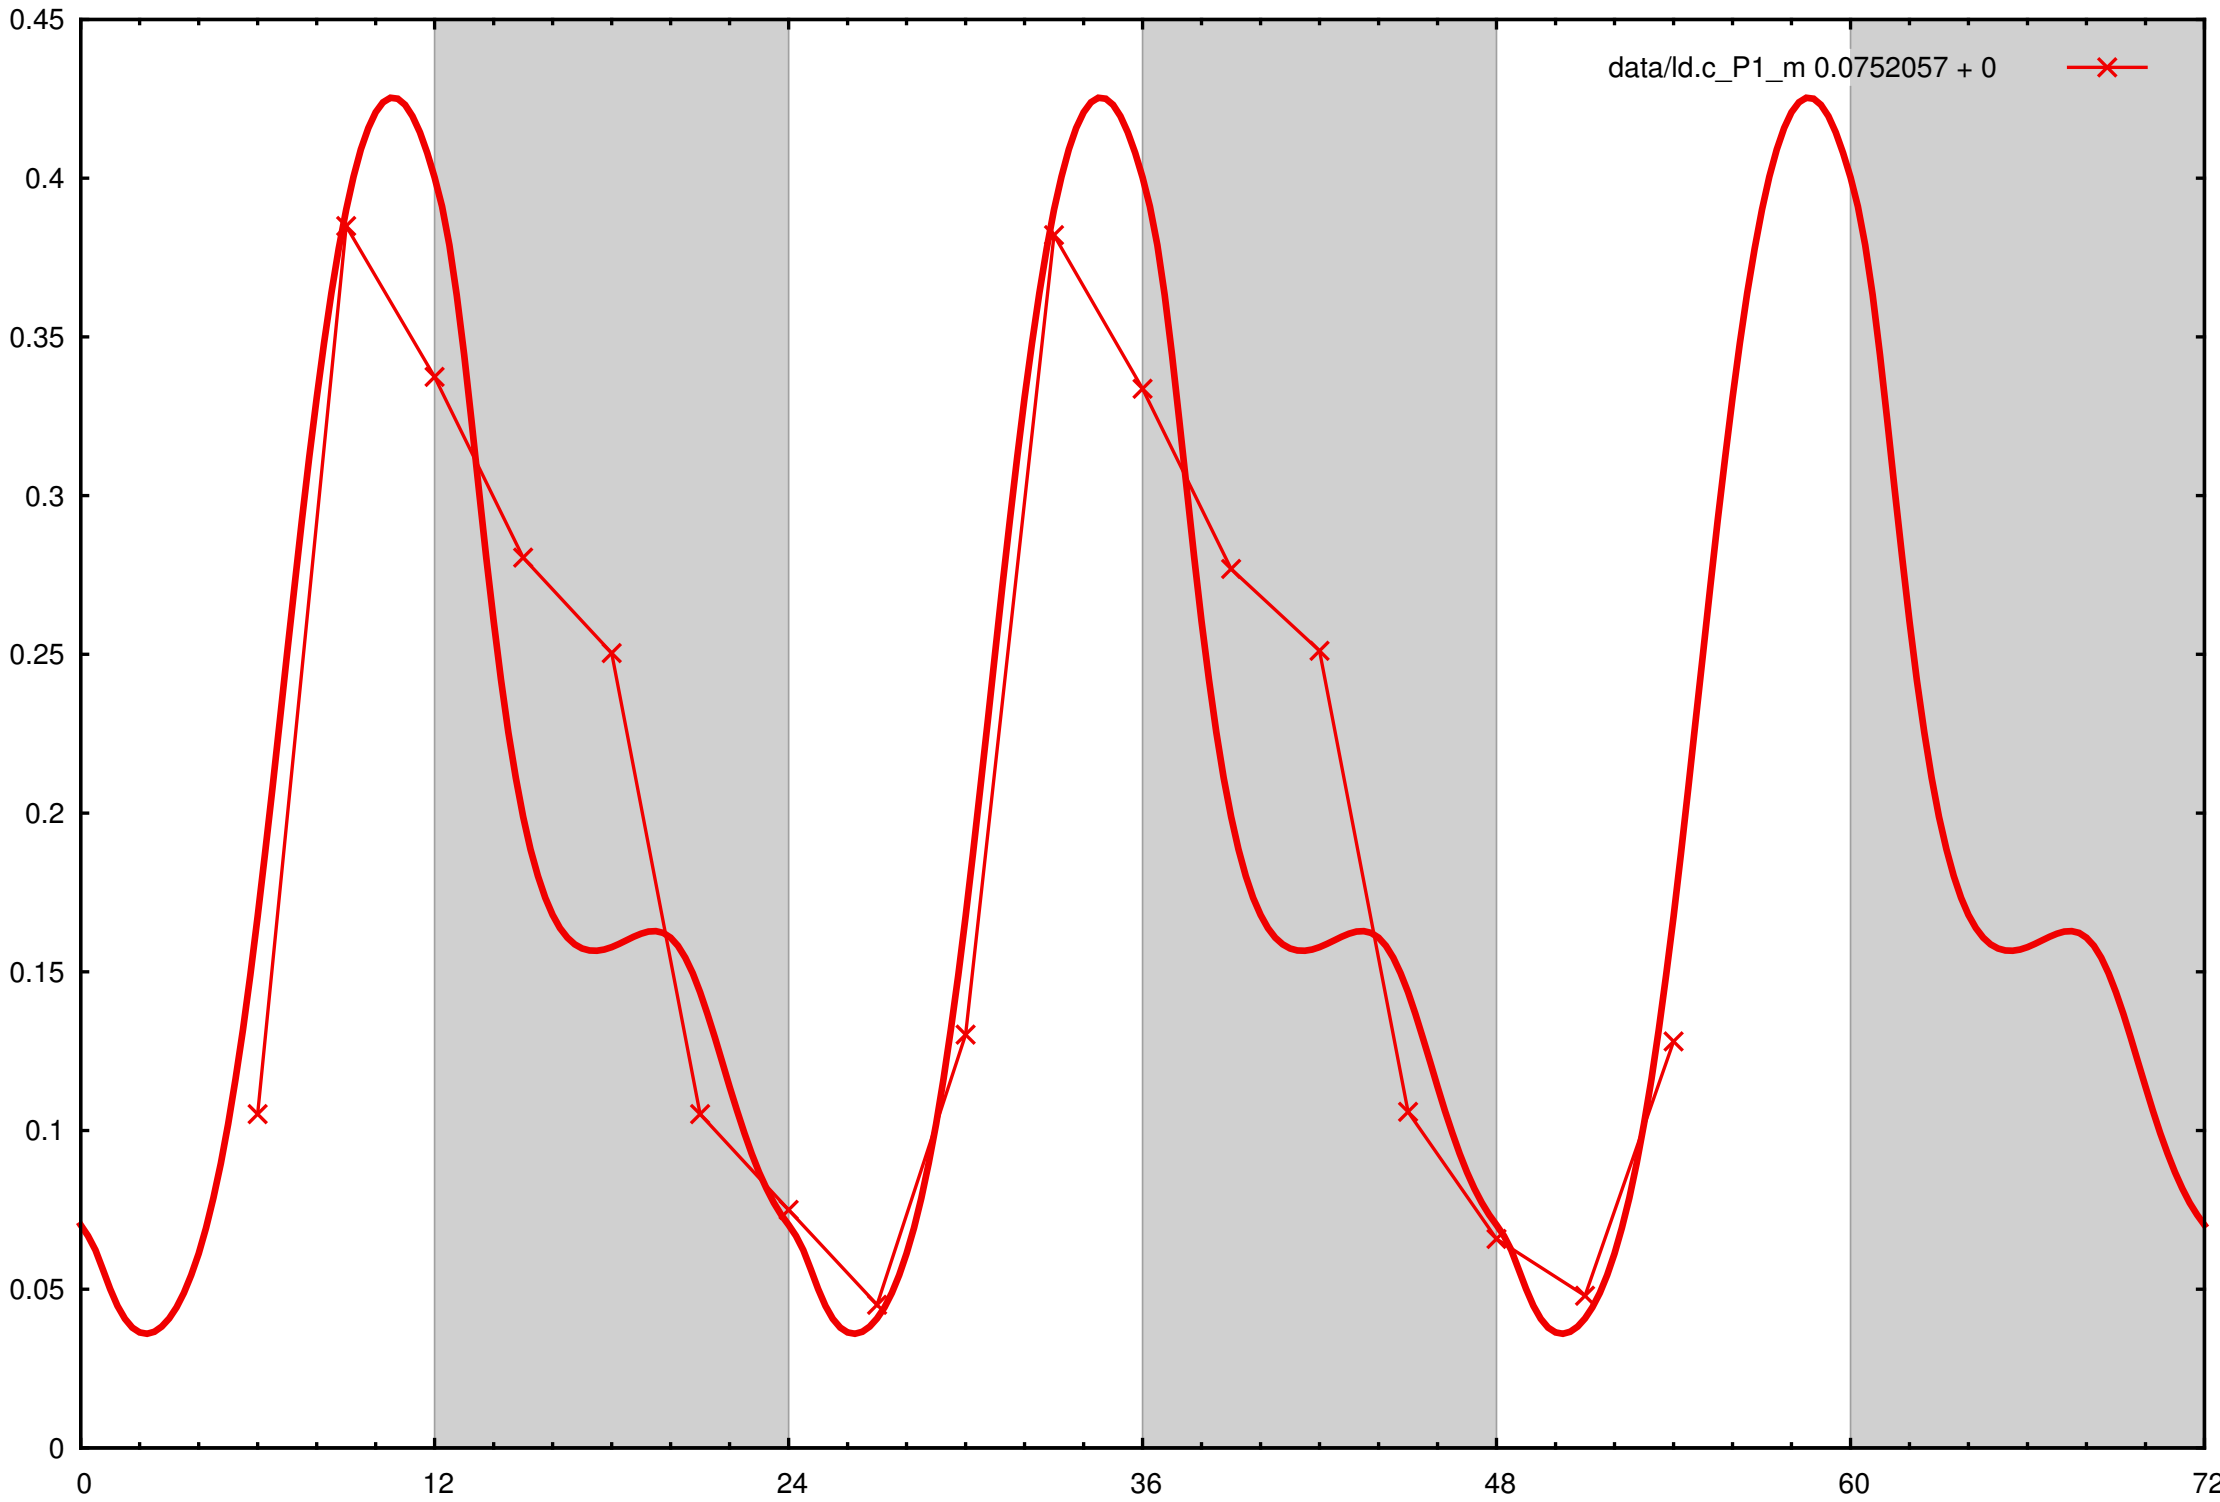

Scale group 301, scost 0

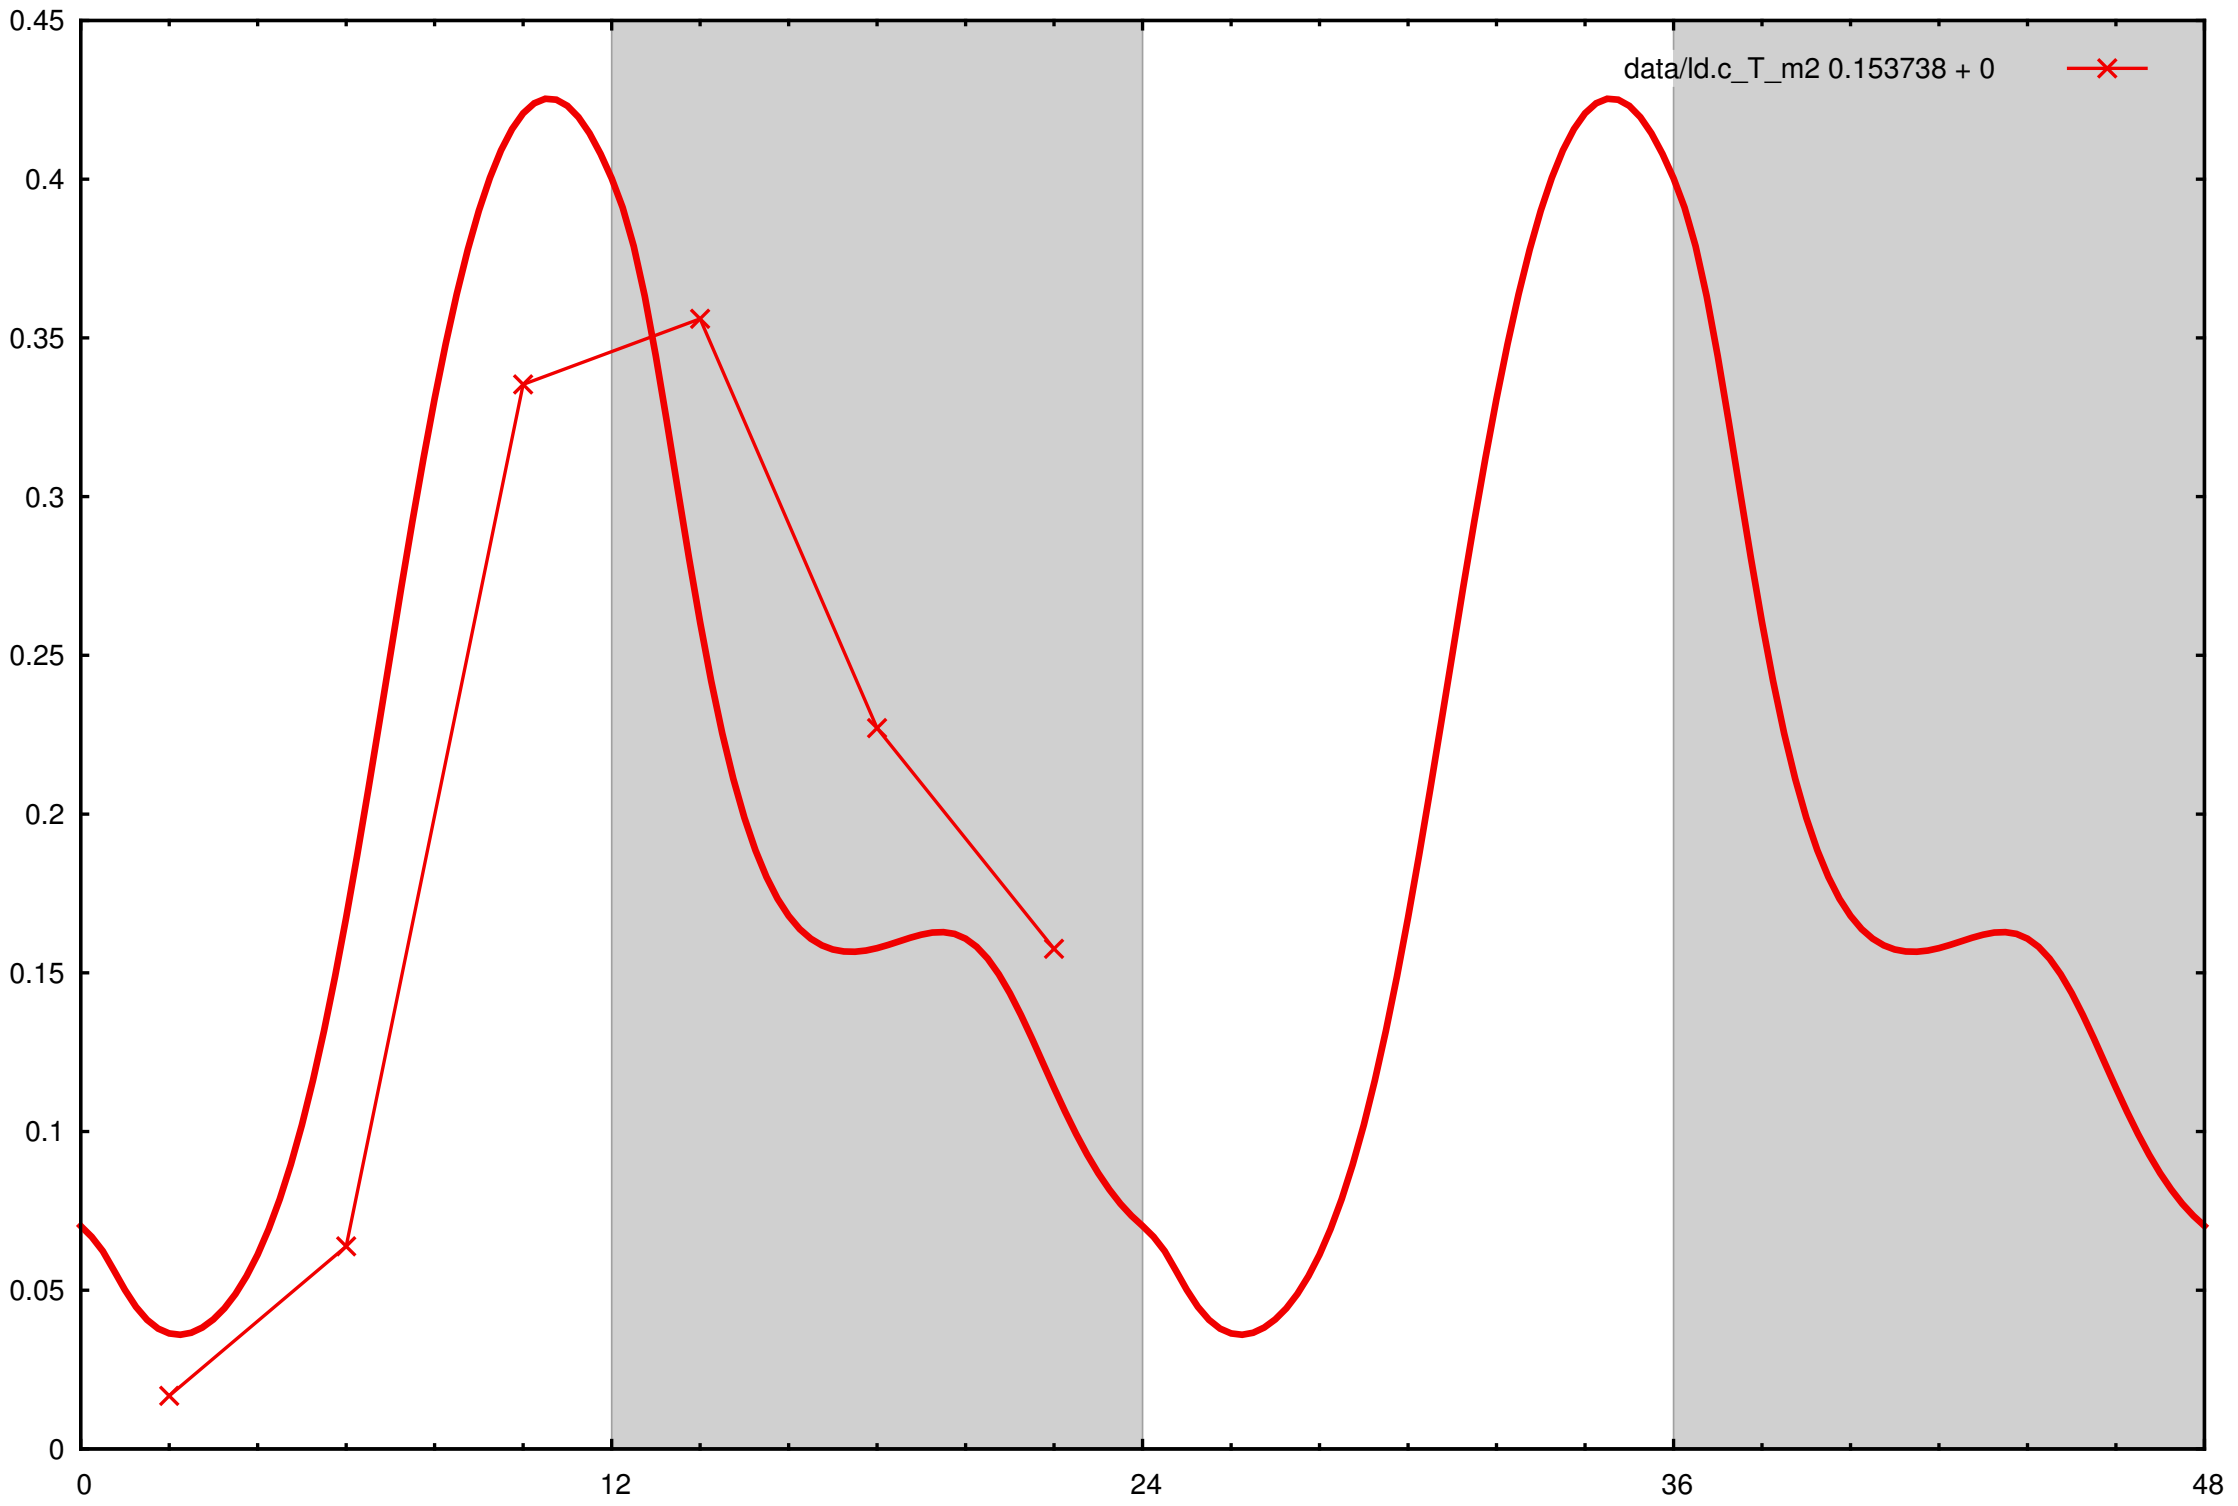

Scale group 302, scost 0

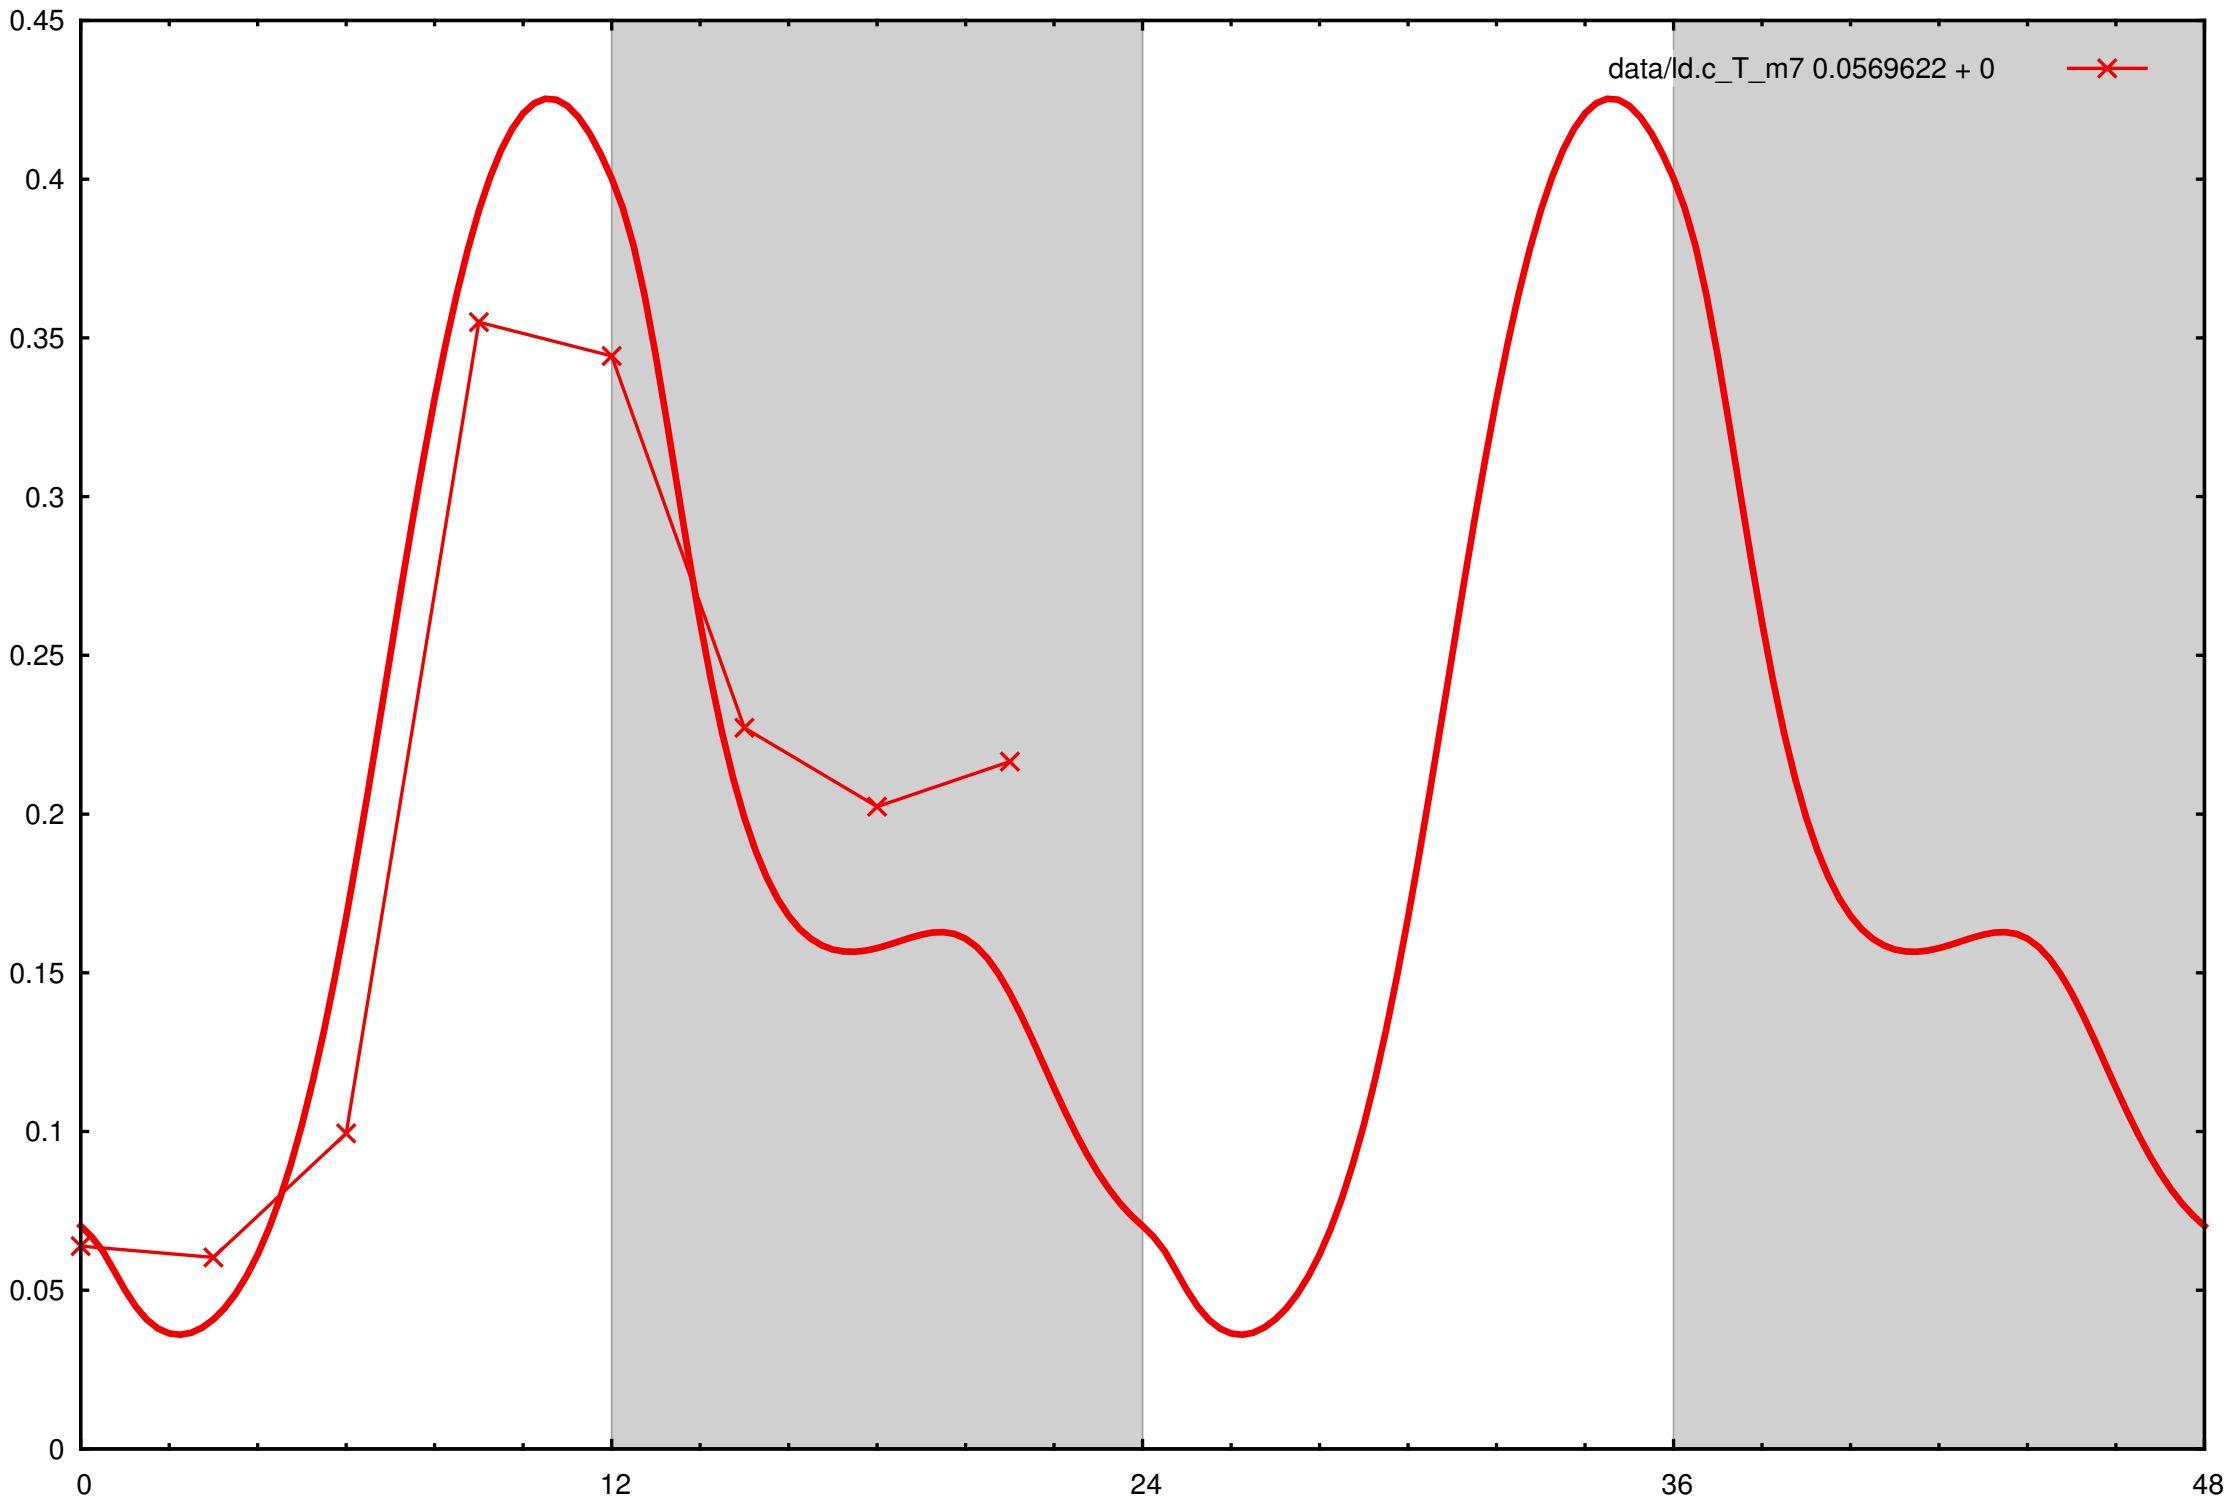

Scale group 303, scost 0

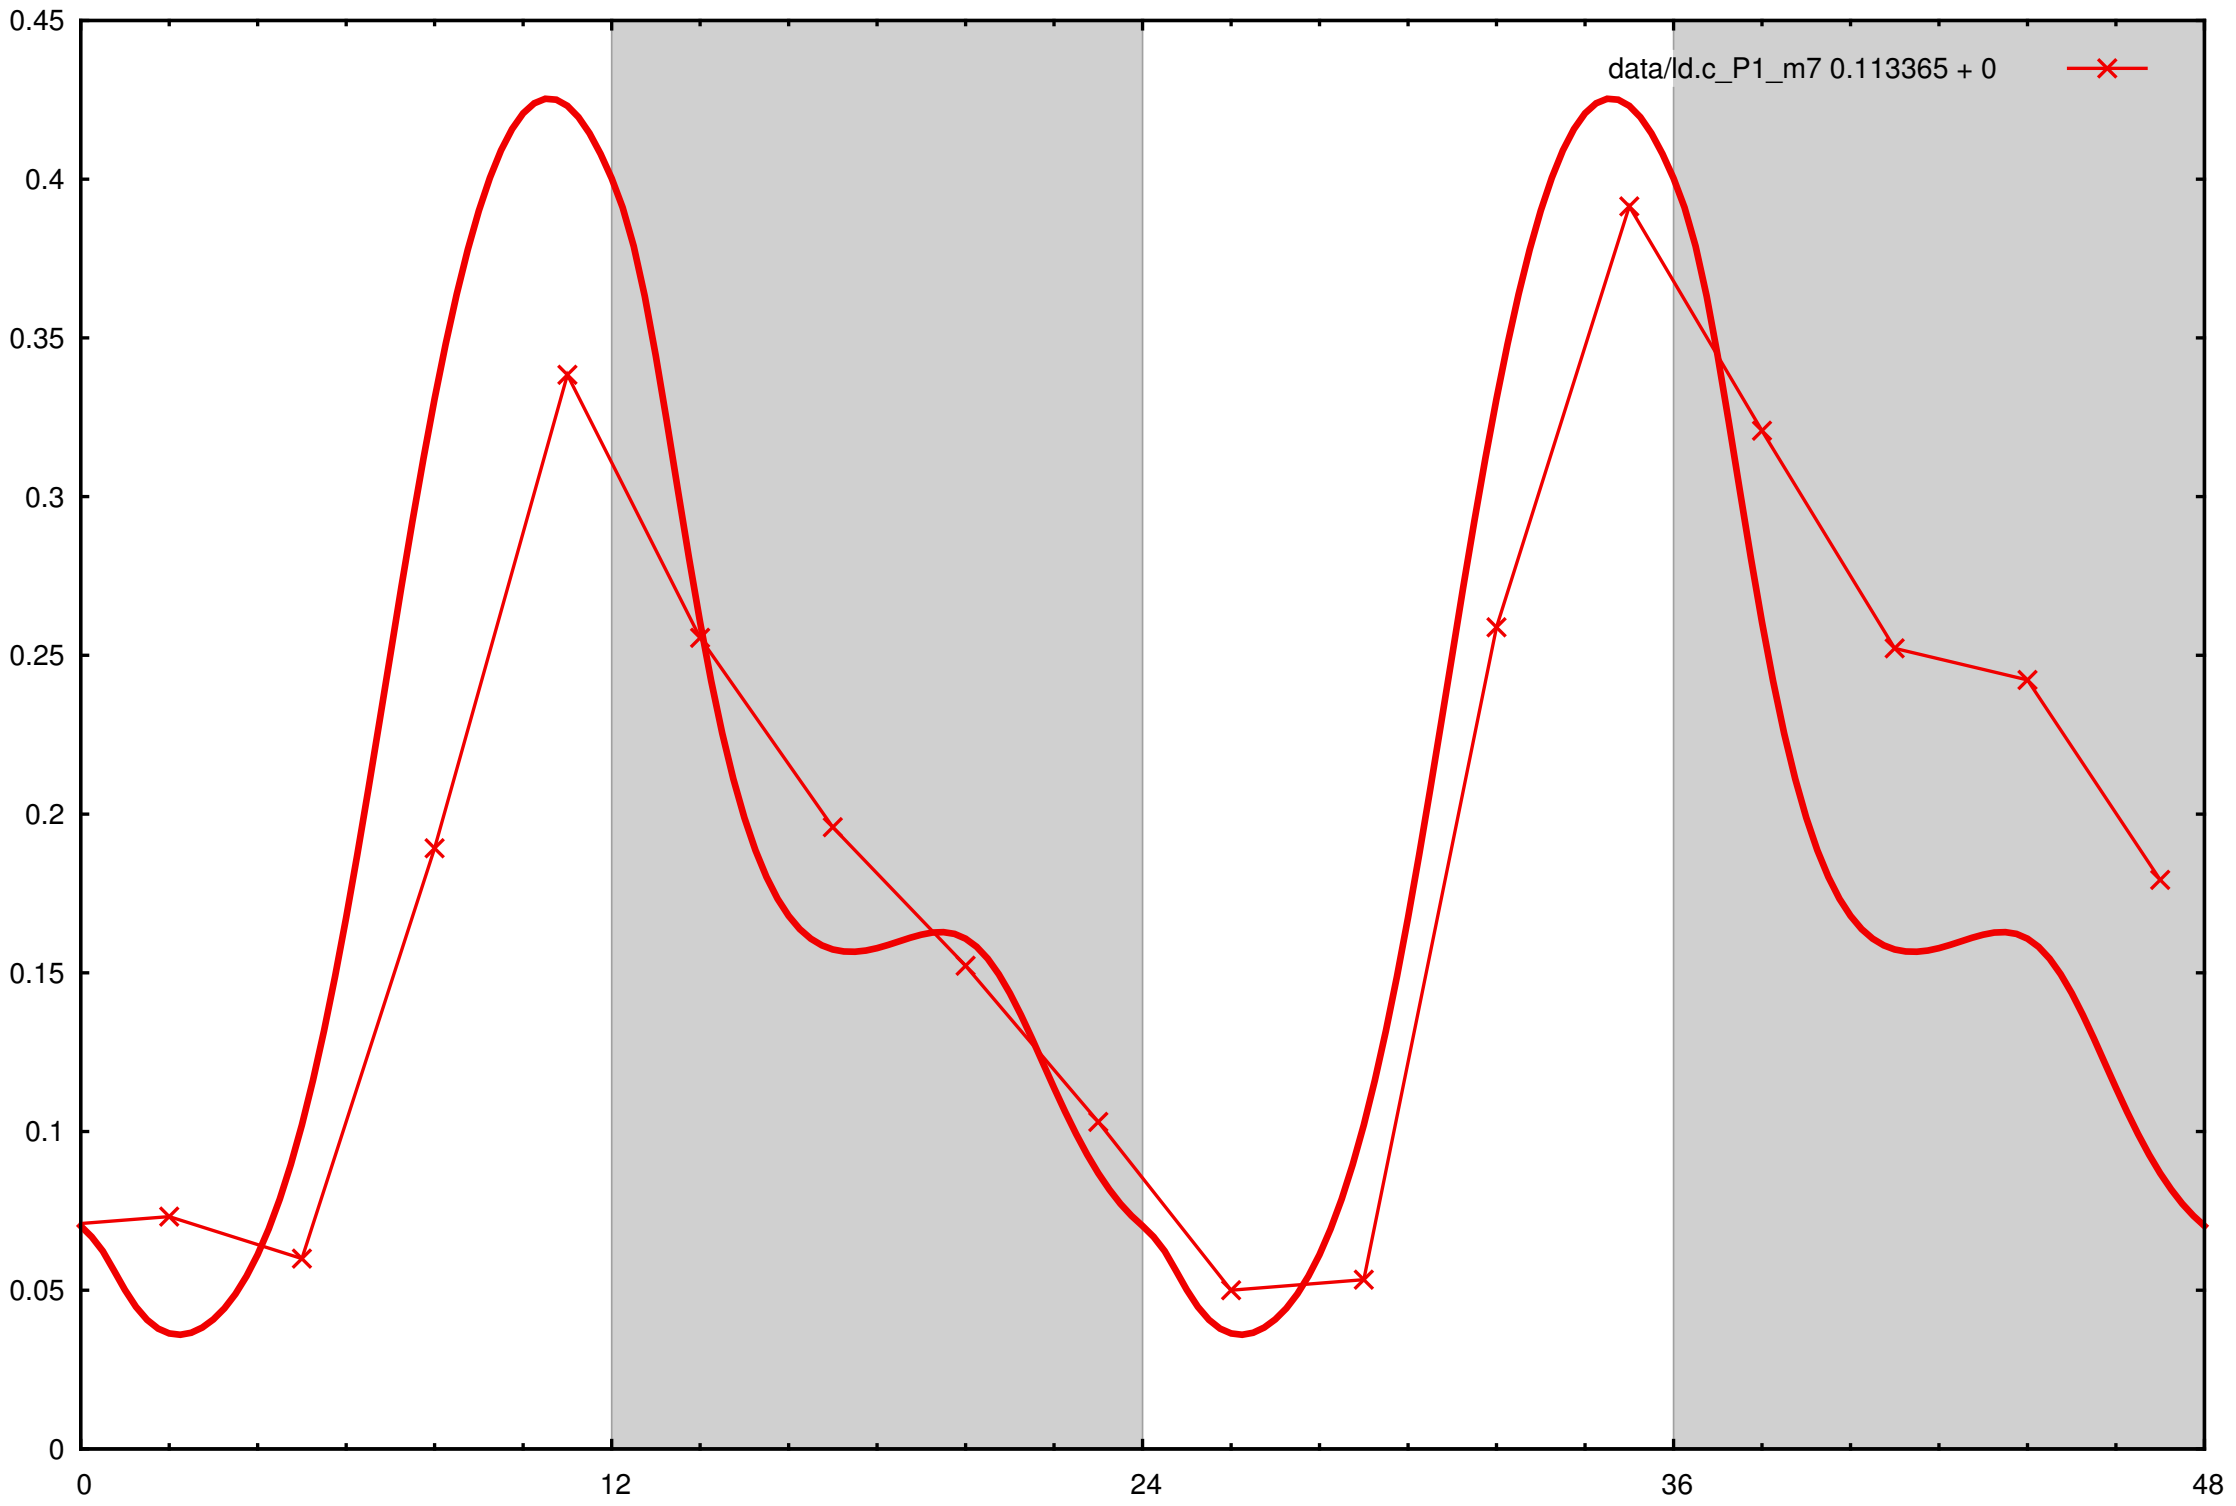

Scale group 304, scost 0

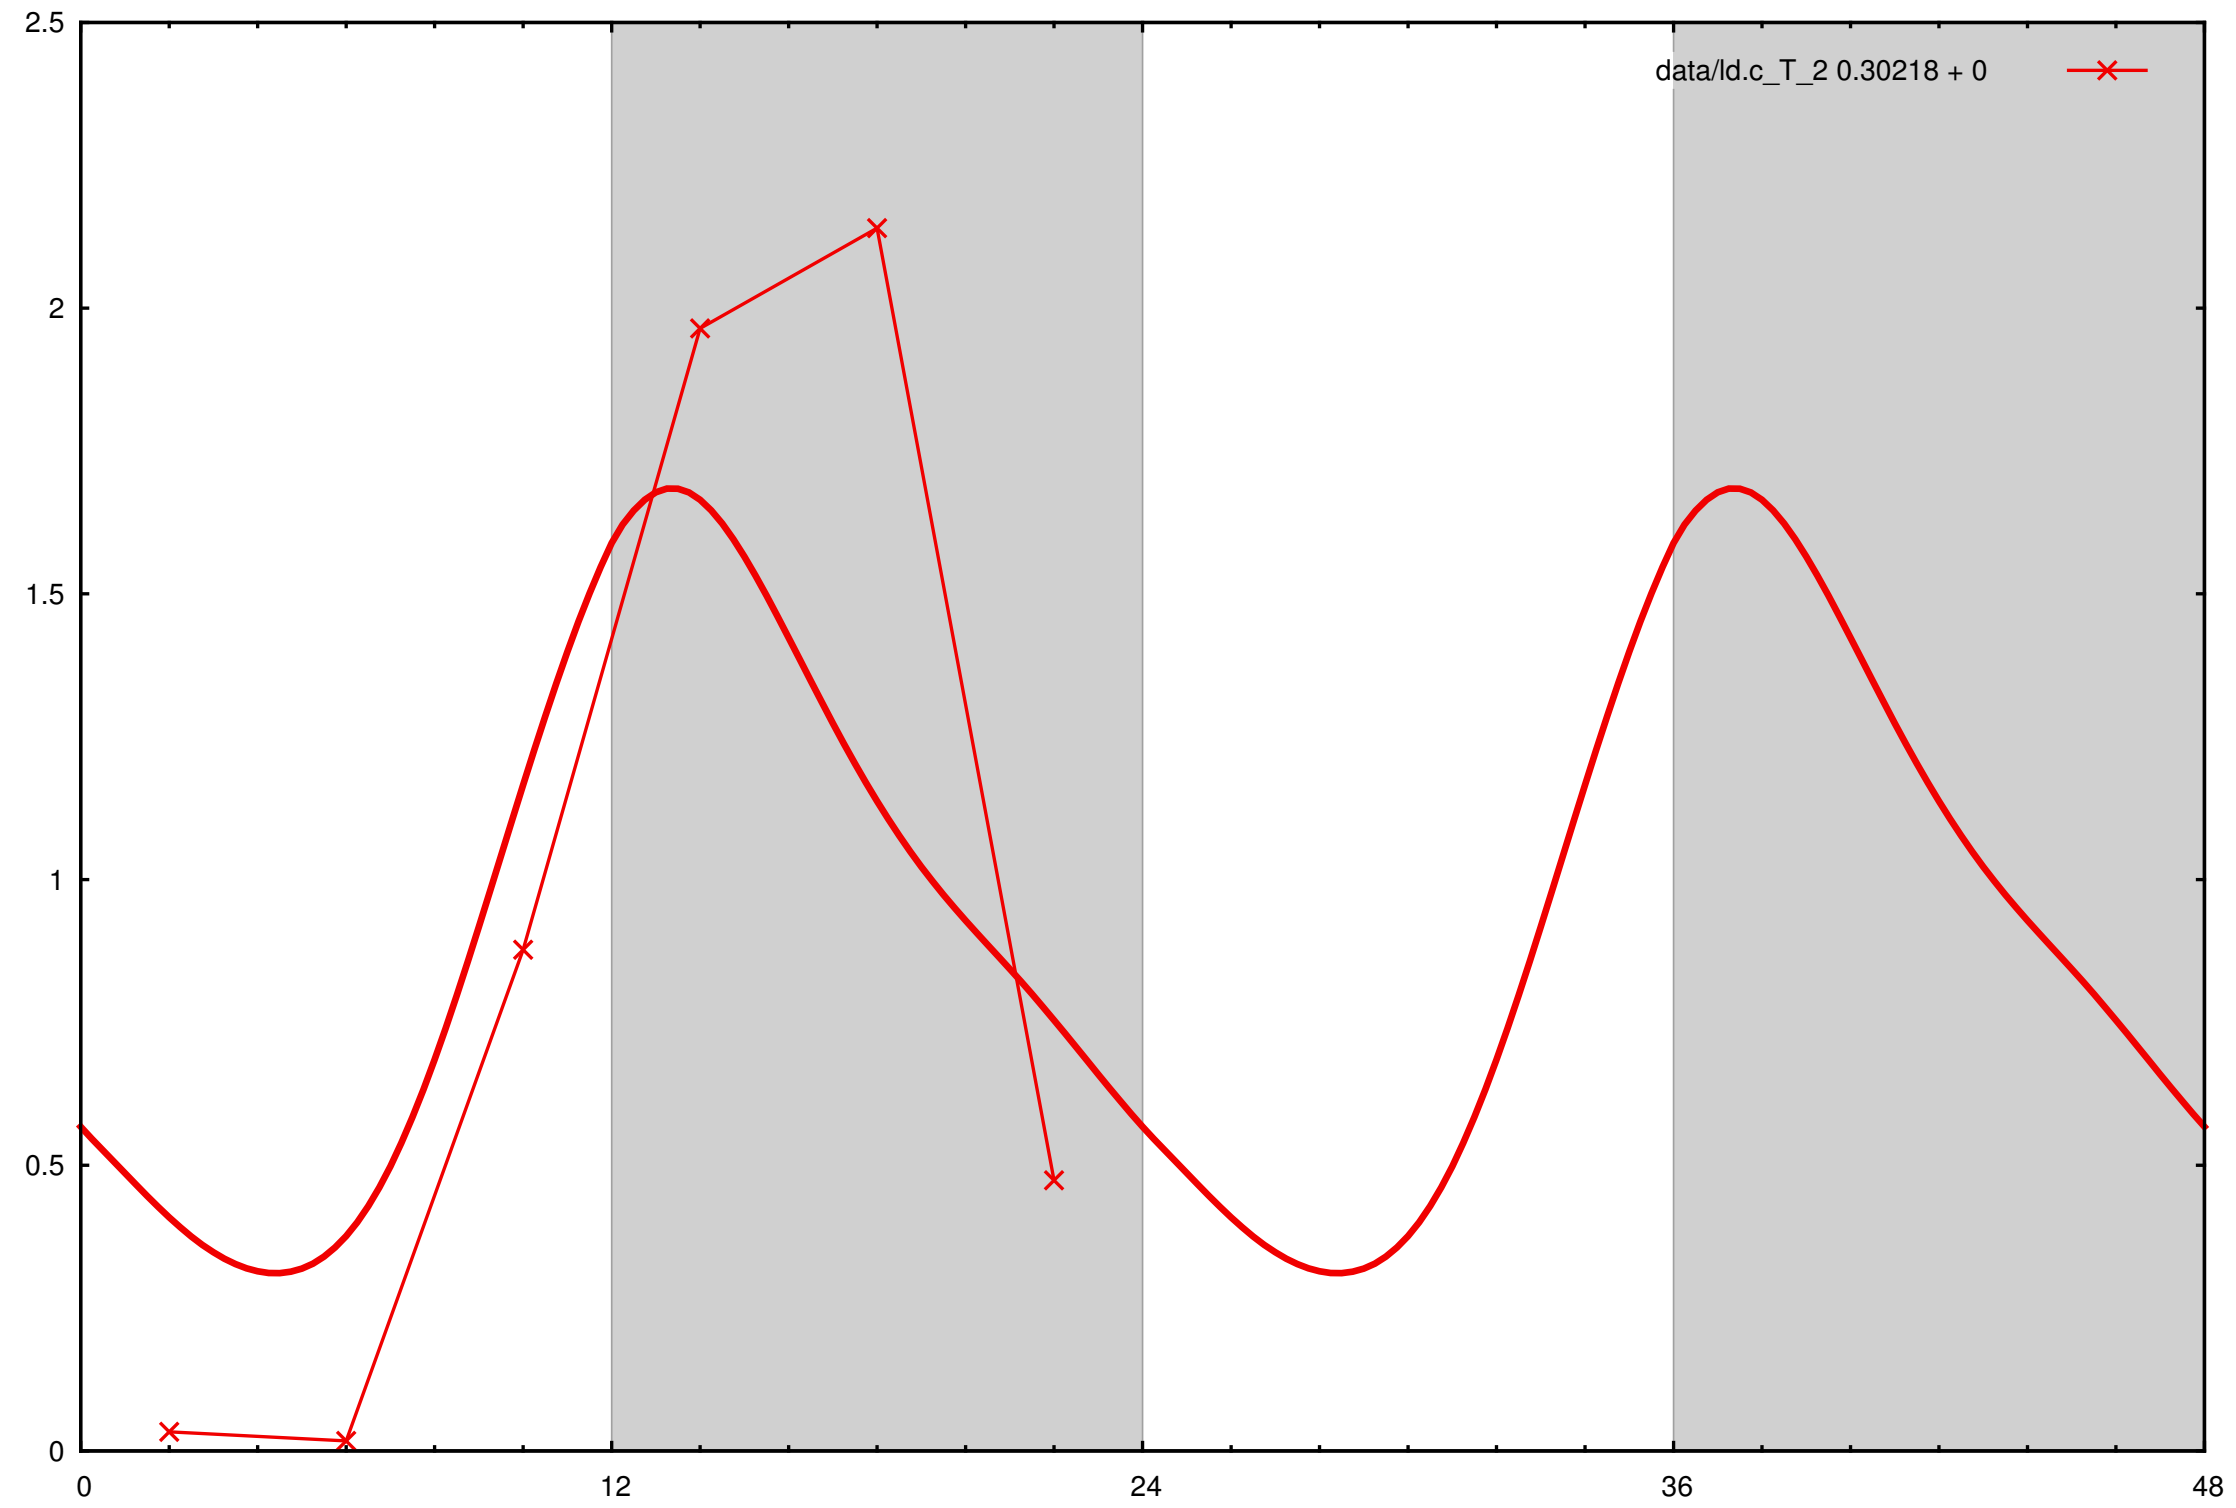



Scale group 305, scost 0

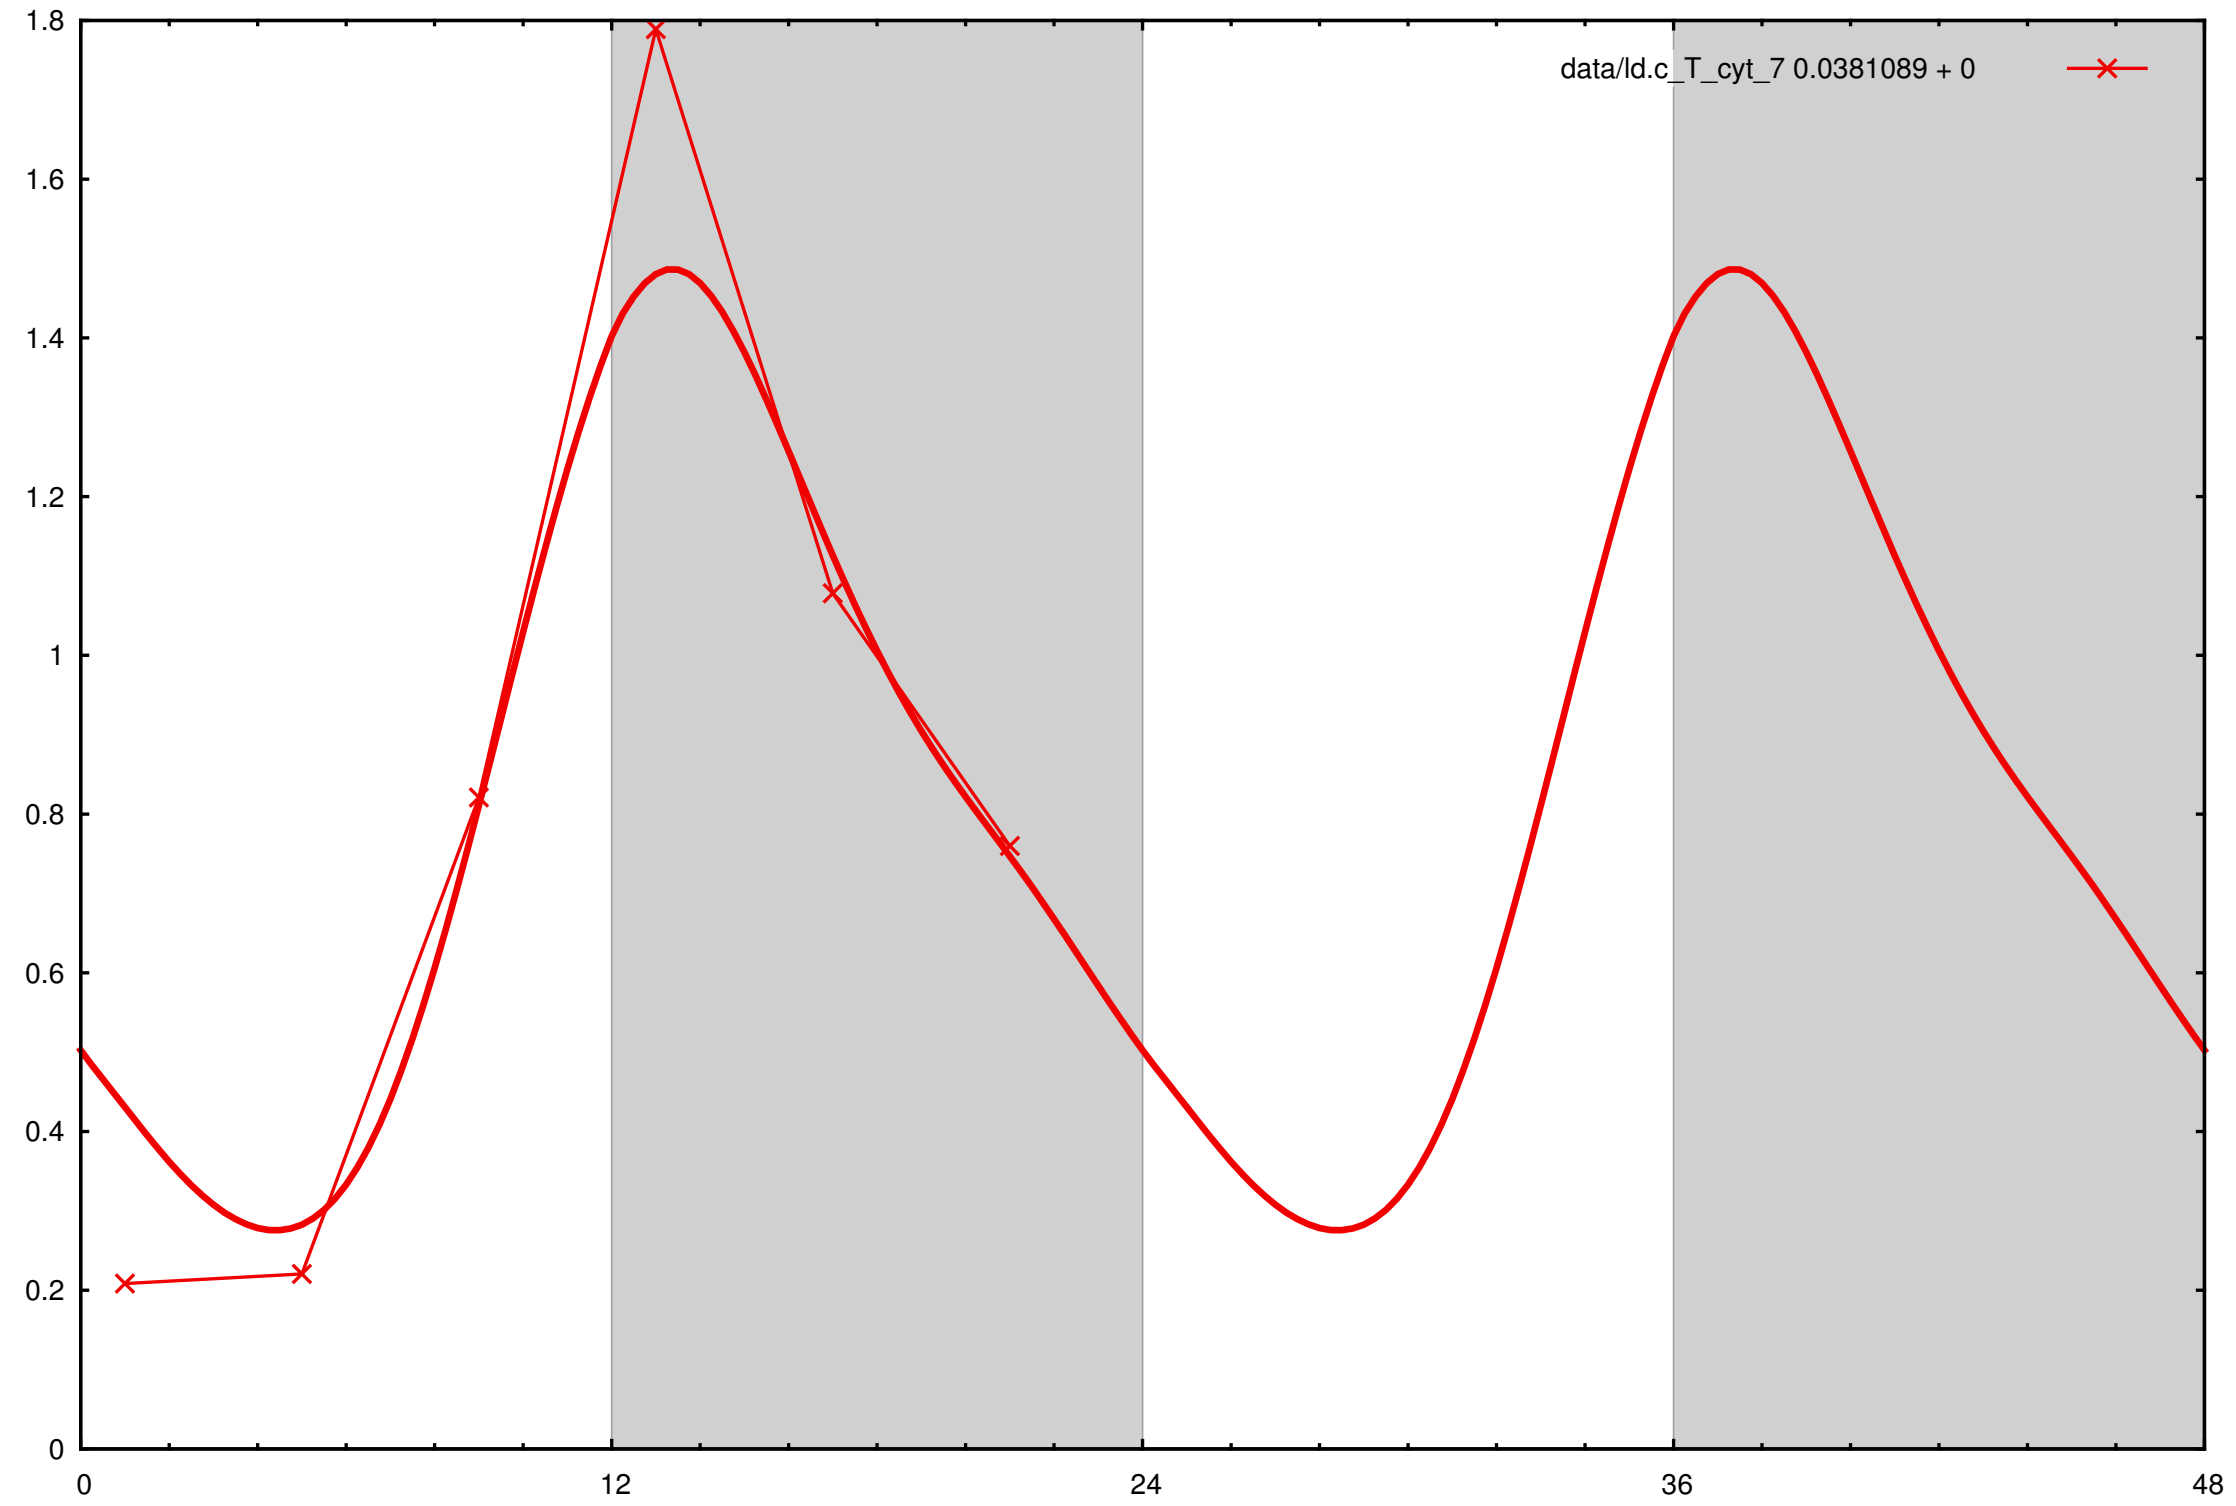

Scale group 306, scost 0

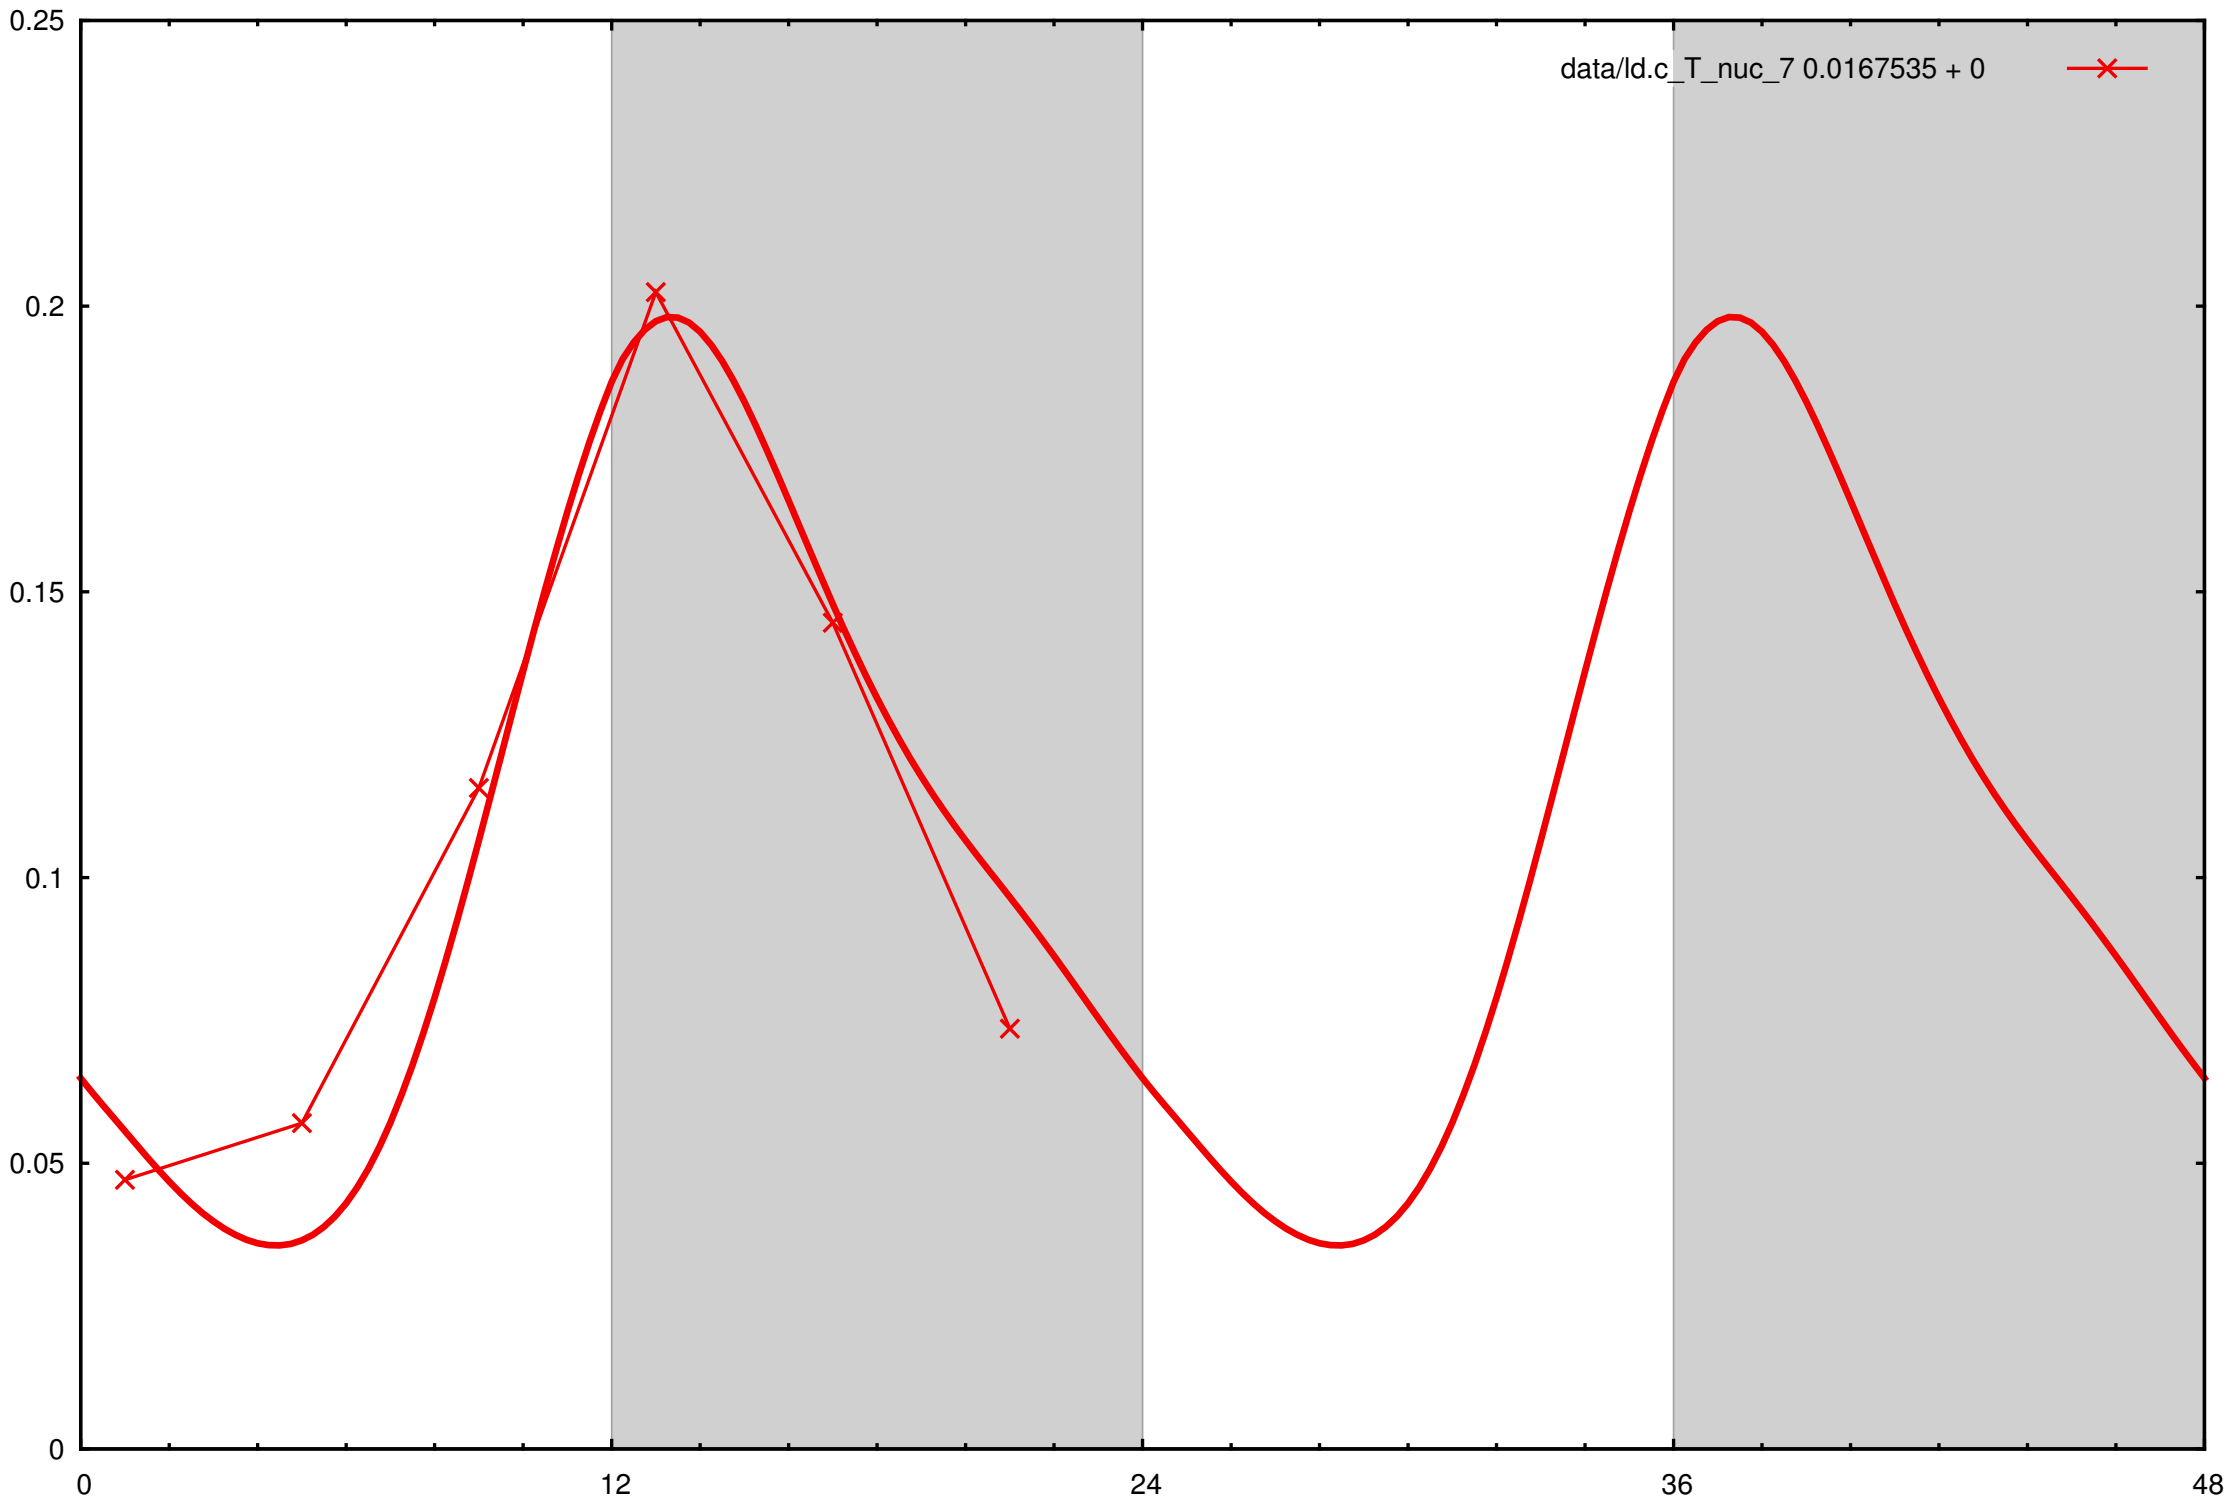

Scale group 307, scost 0

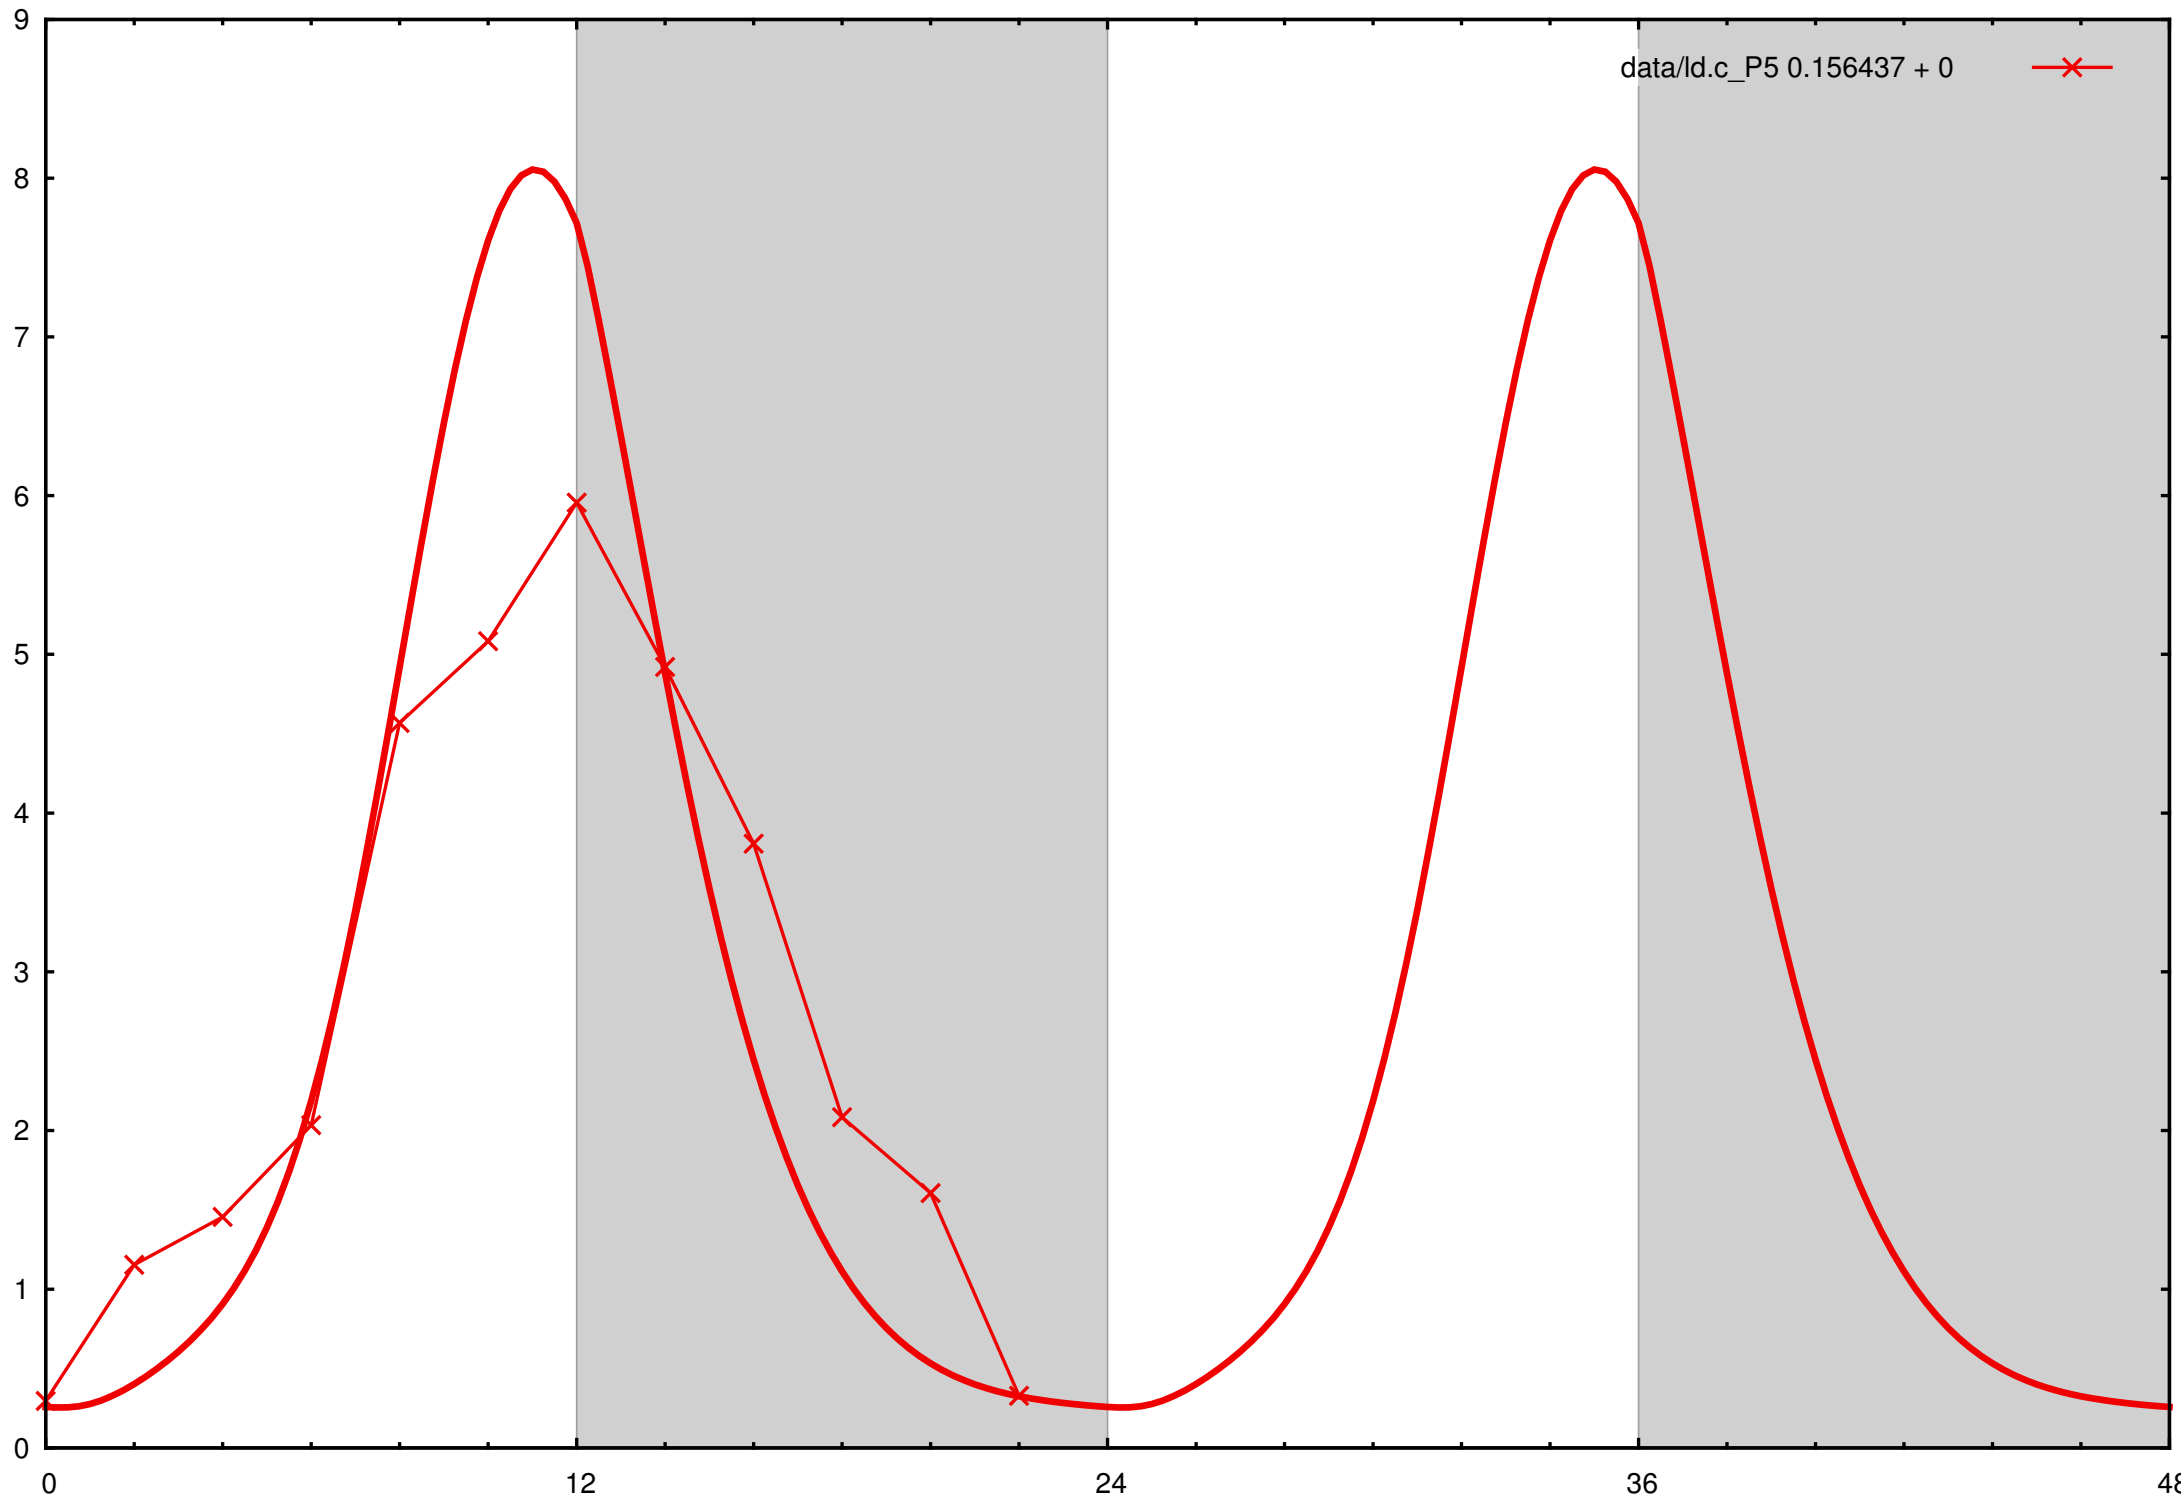

Scale group 308, scost 0

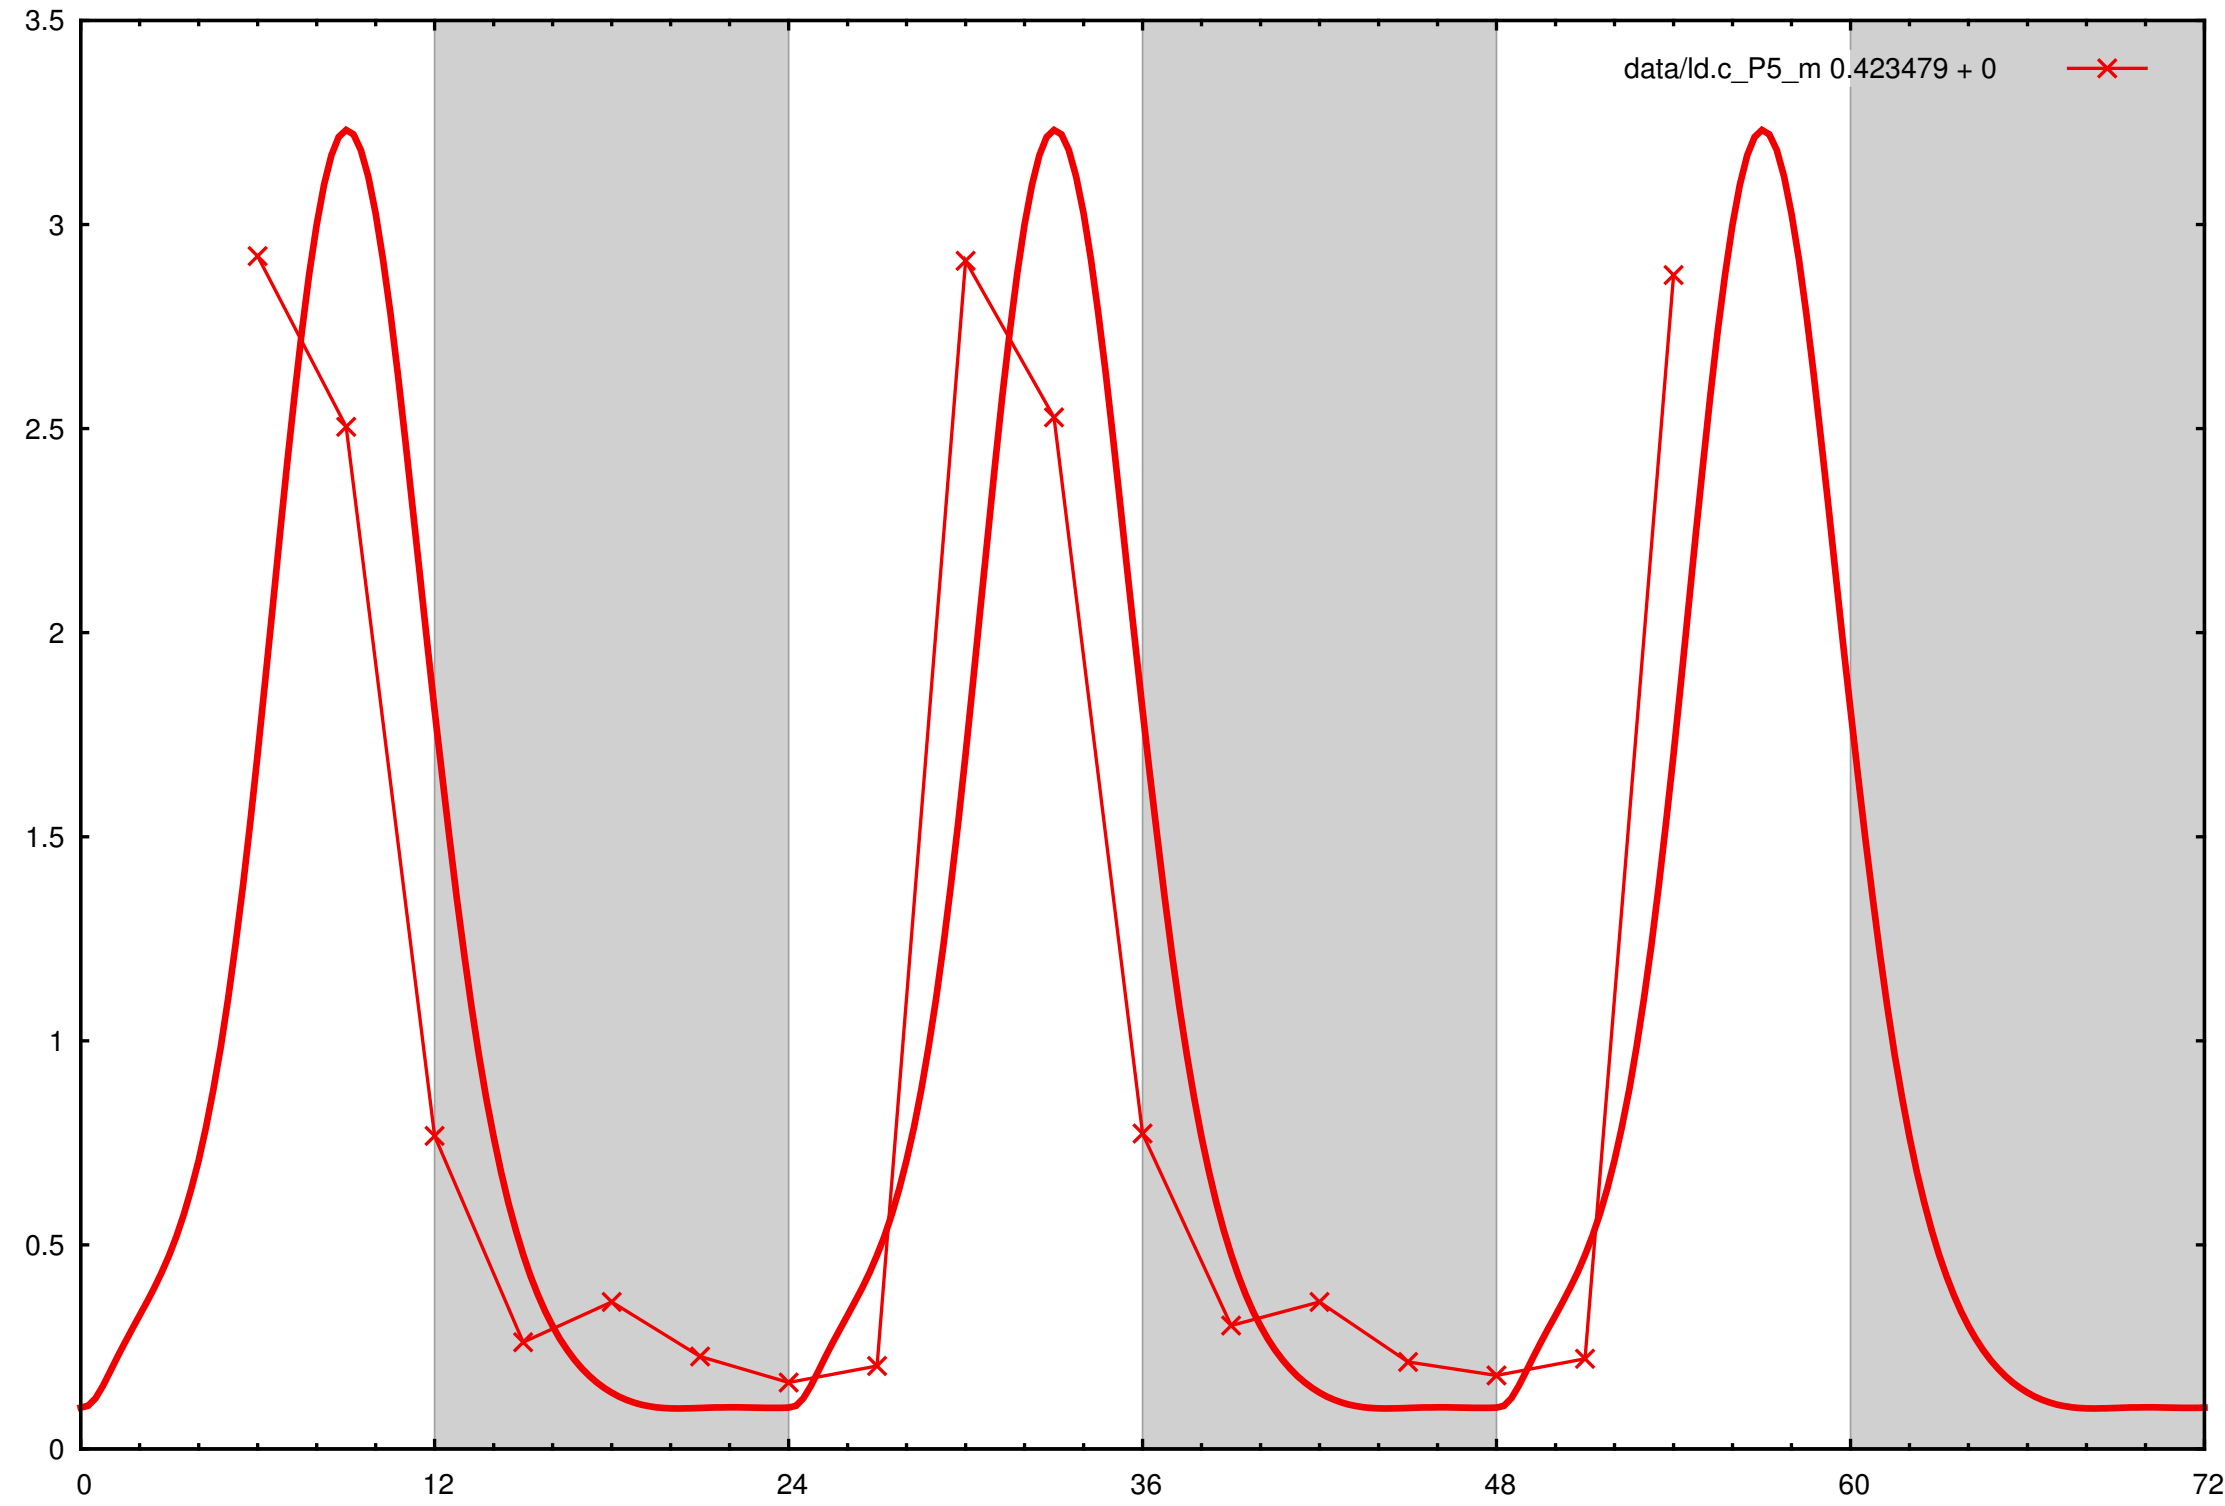

Scale group 309, scost 0

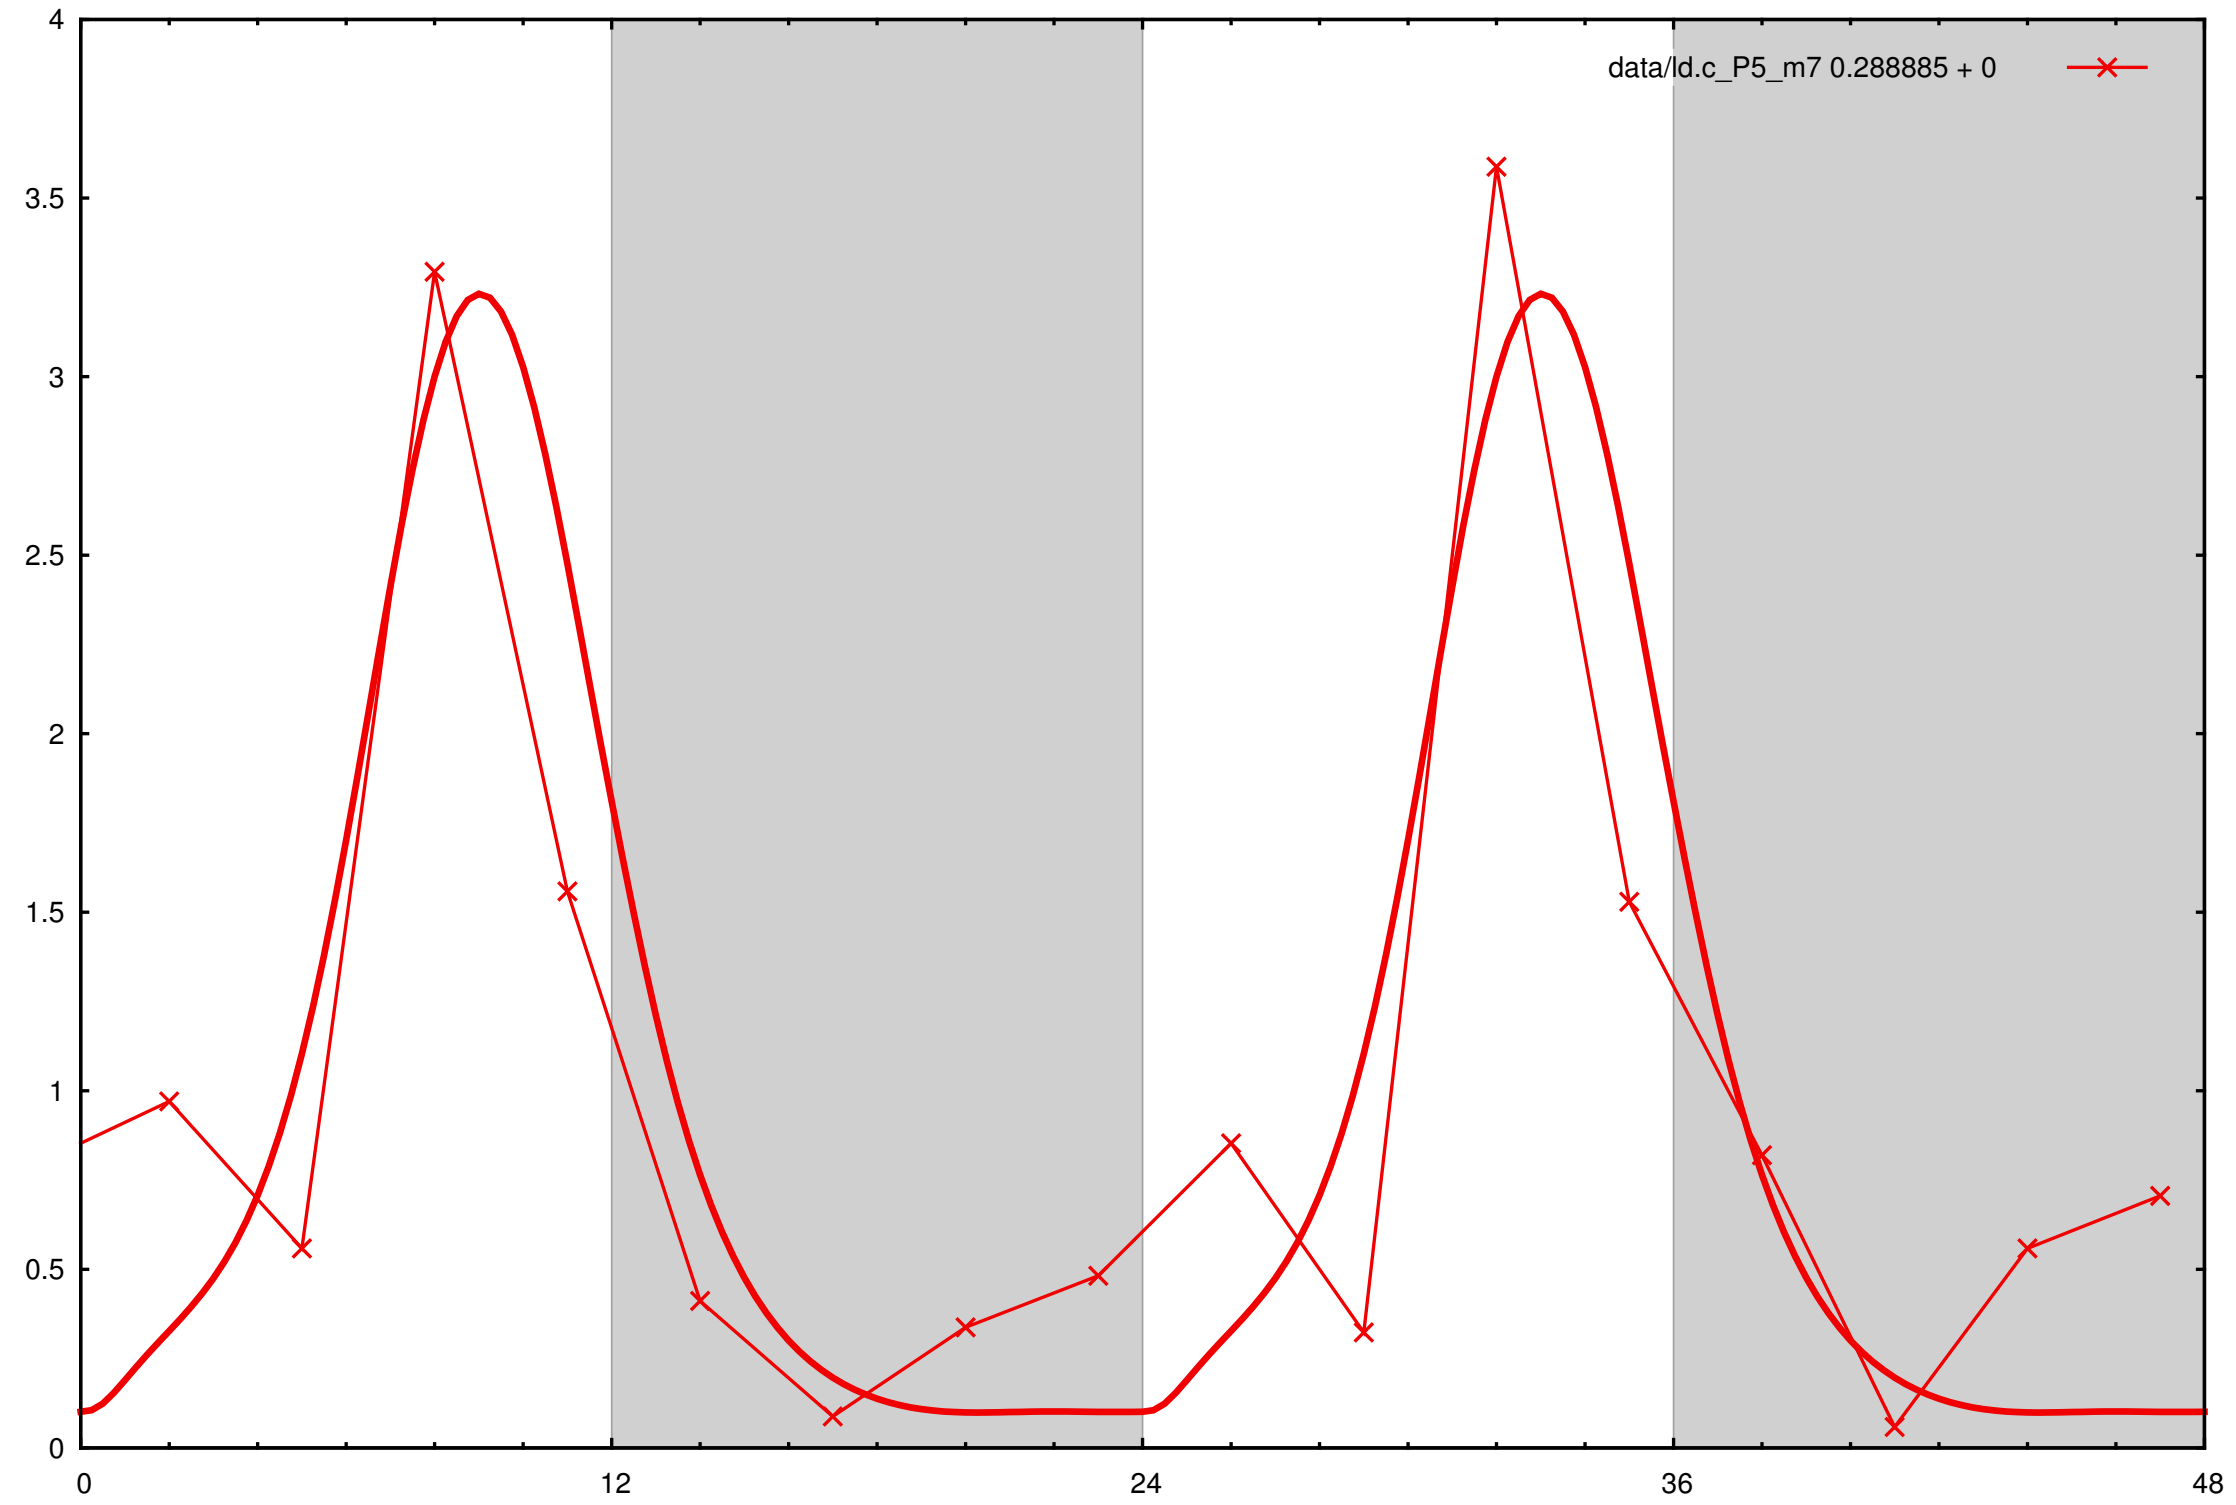

Scale group 310, scost 0

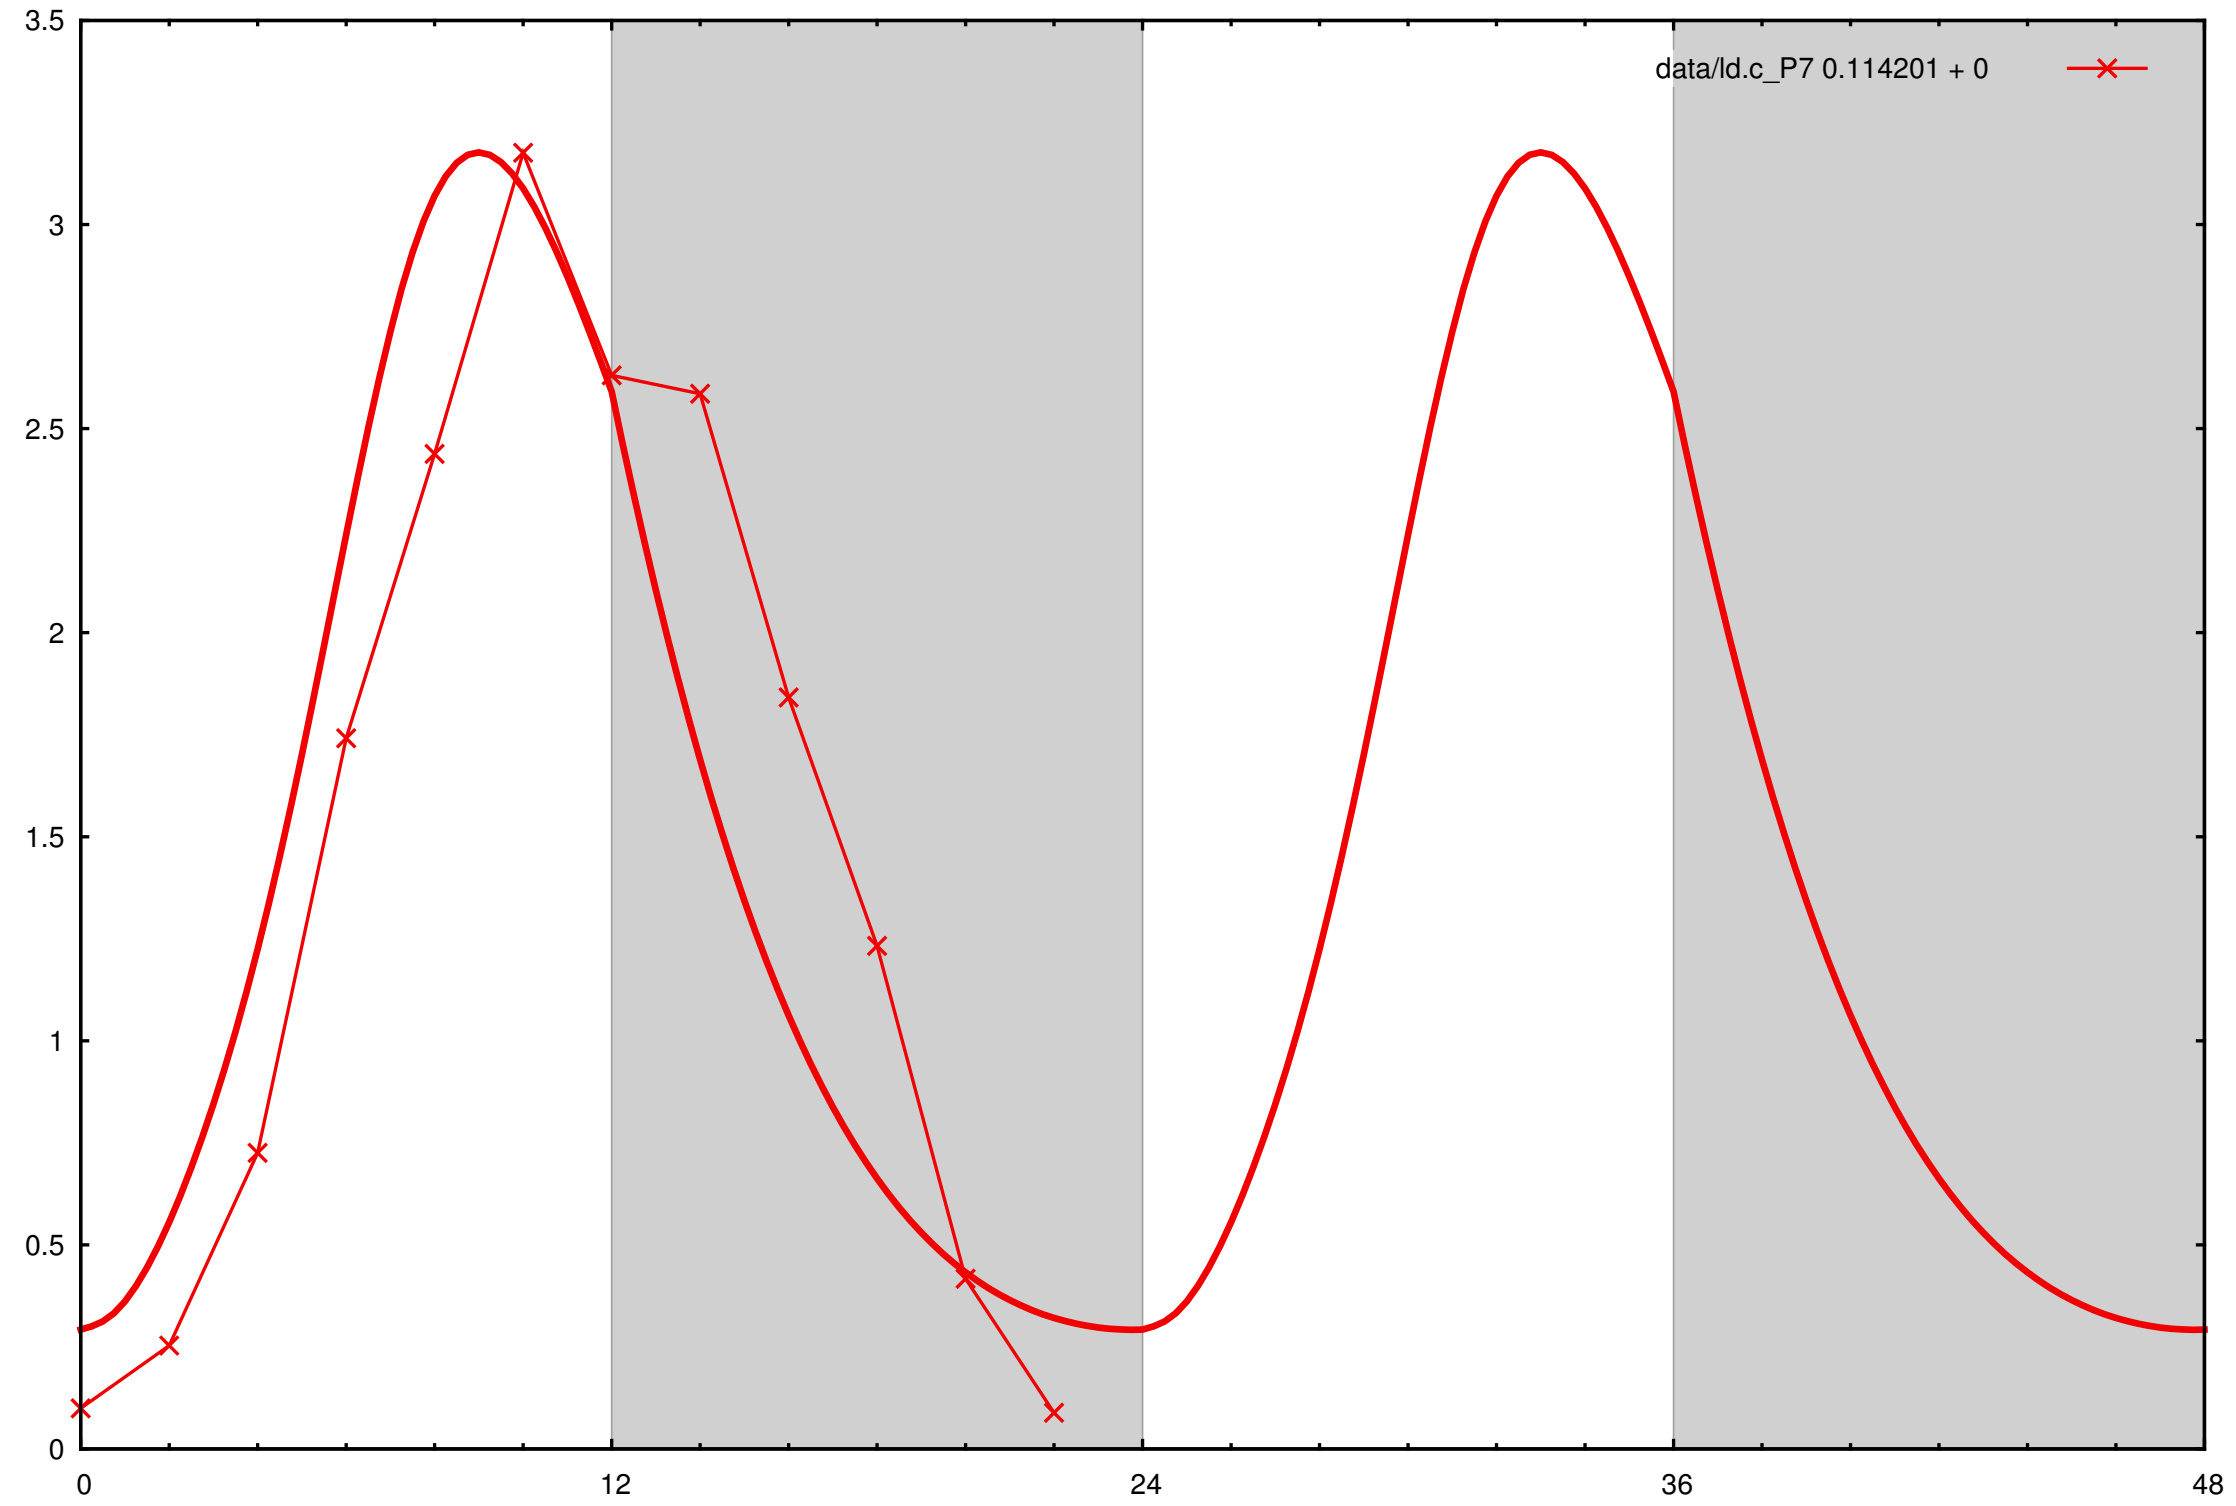

Scale group 311, scost 0

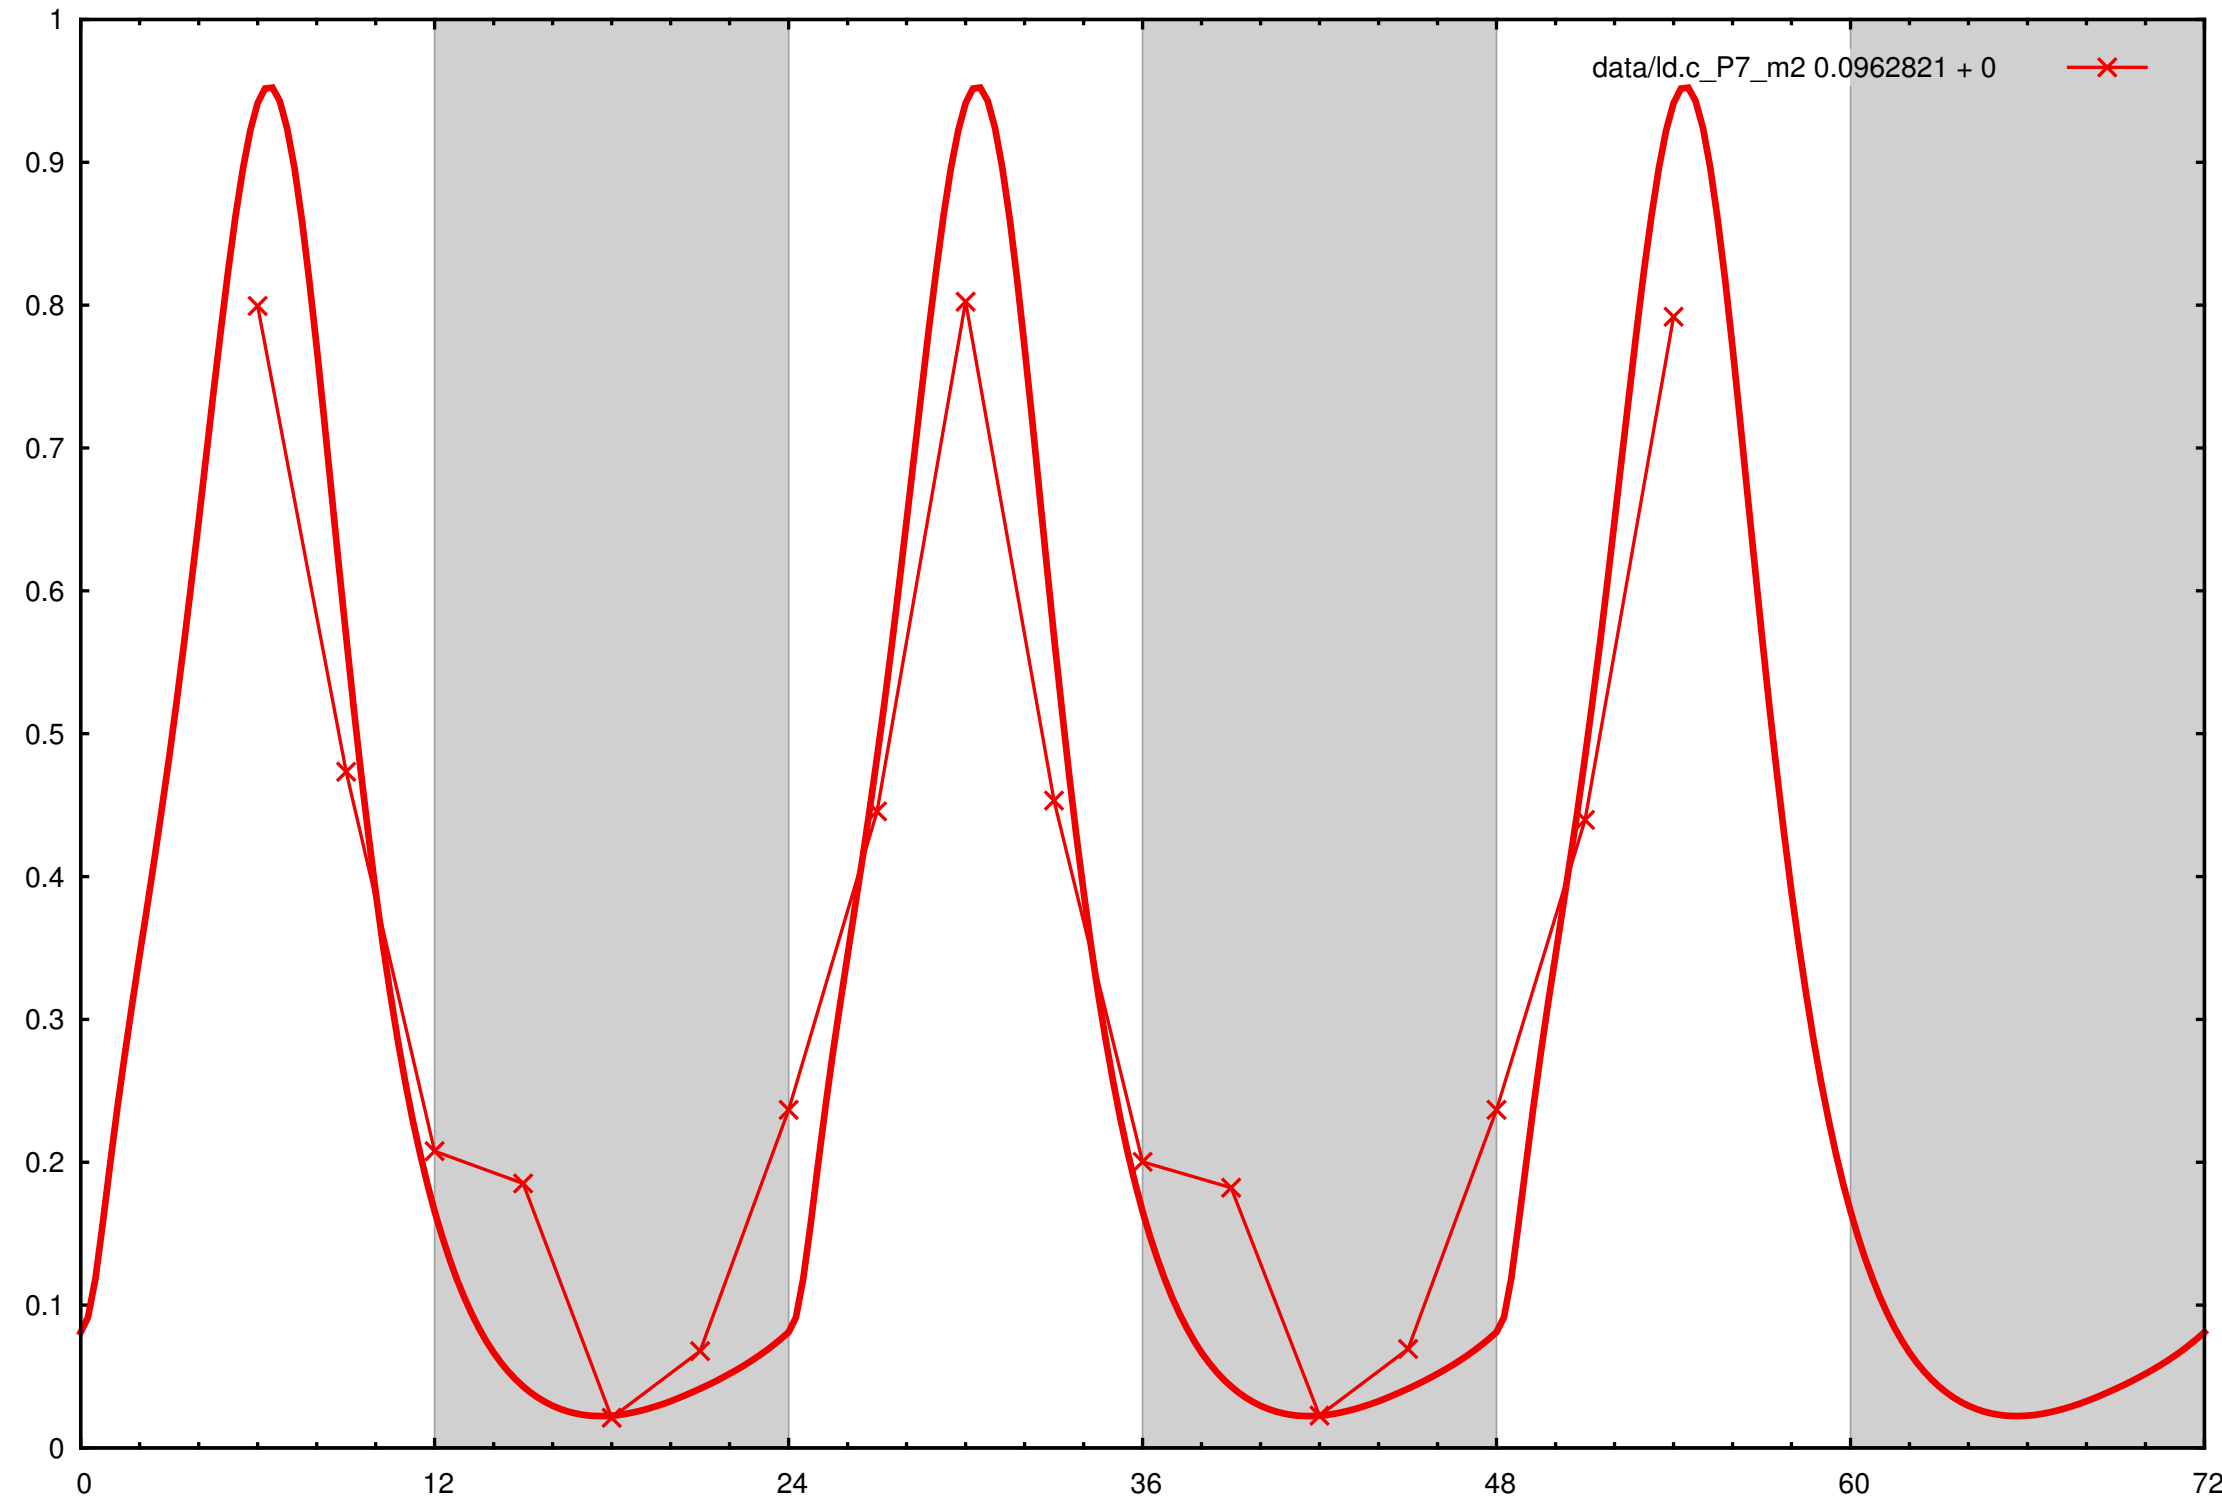

Scale group 312, scost 0

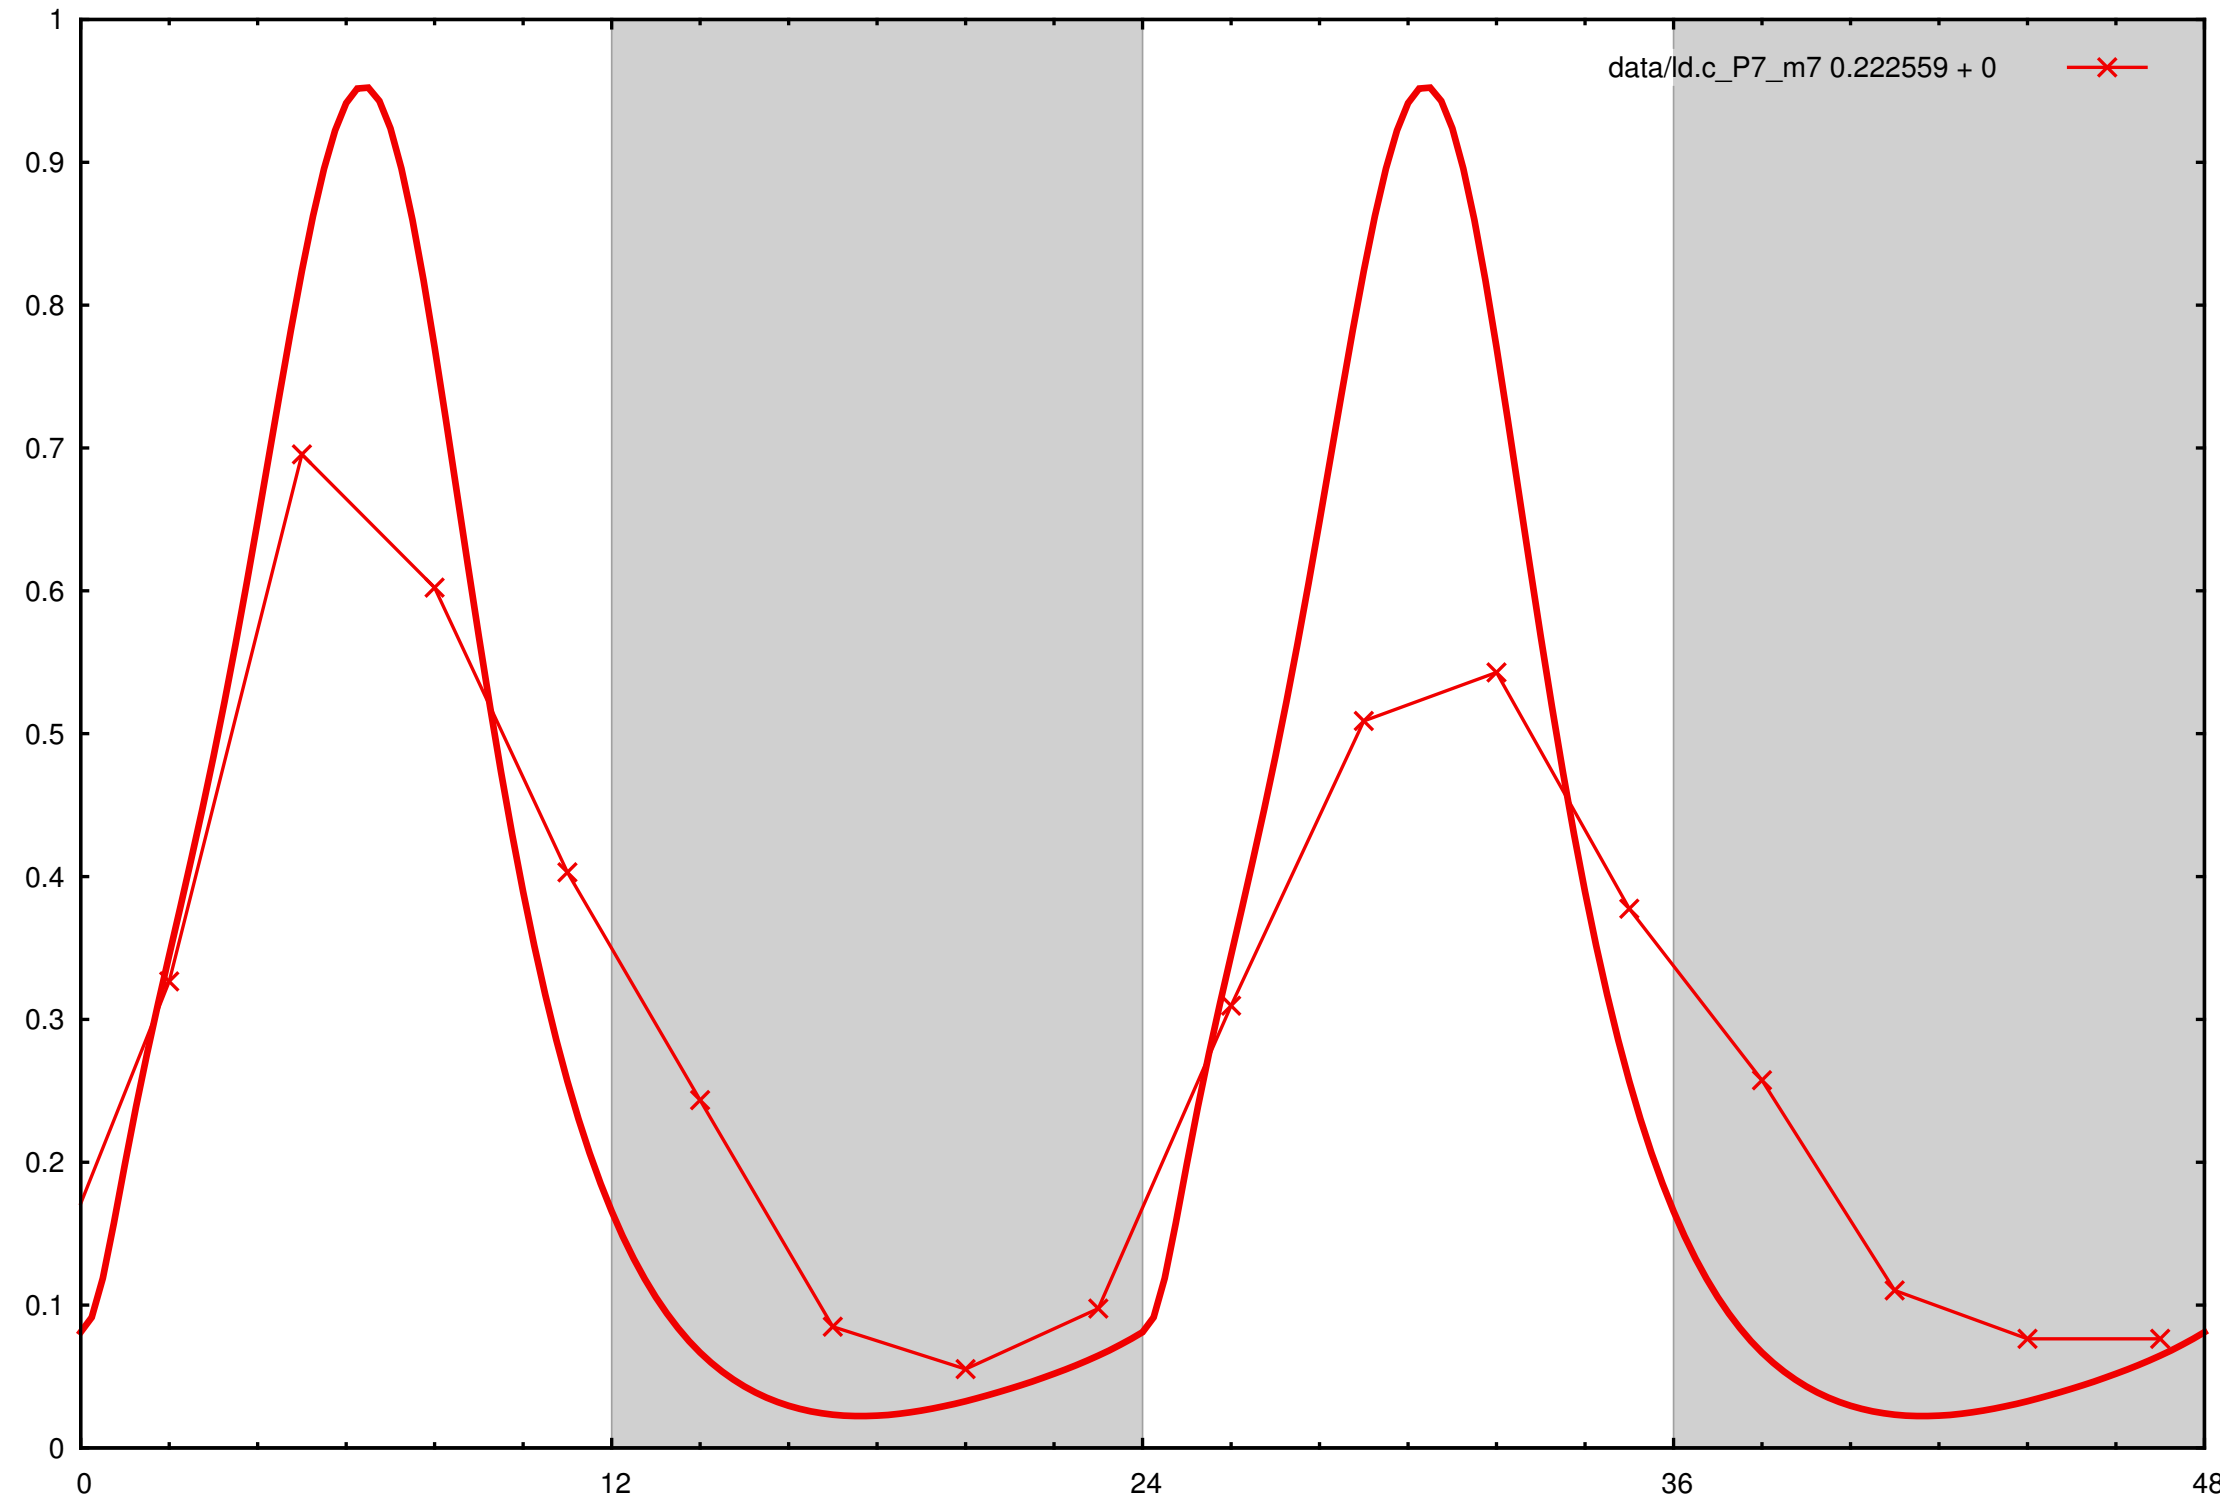



Scale group 313, scost 0

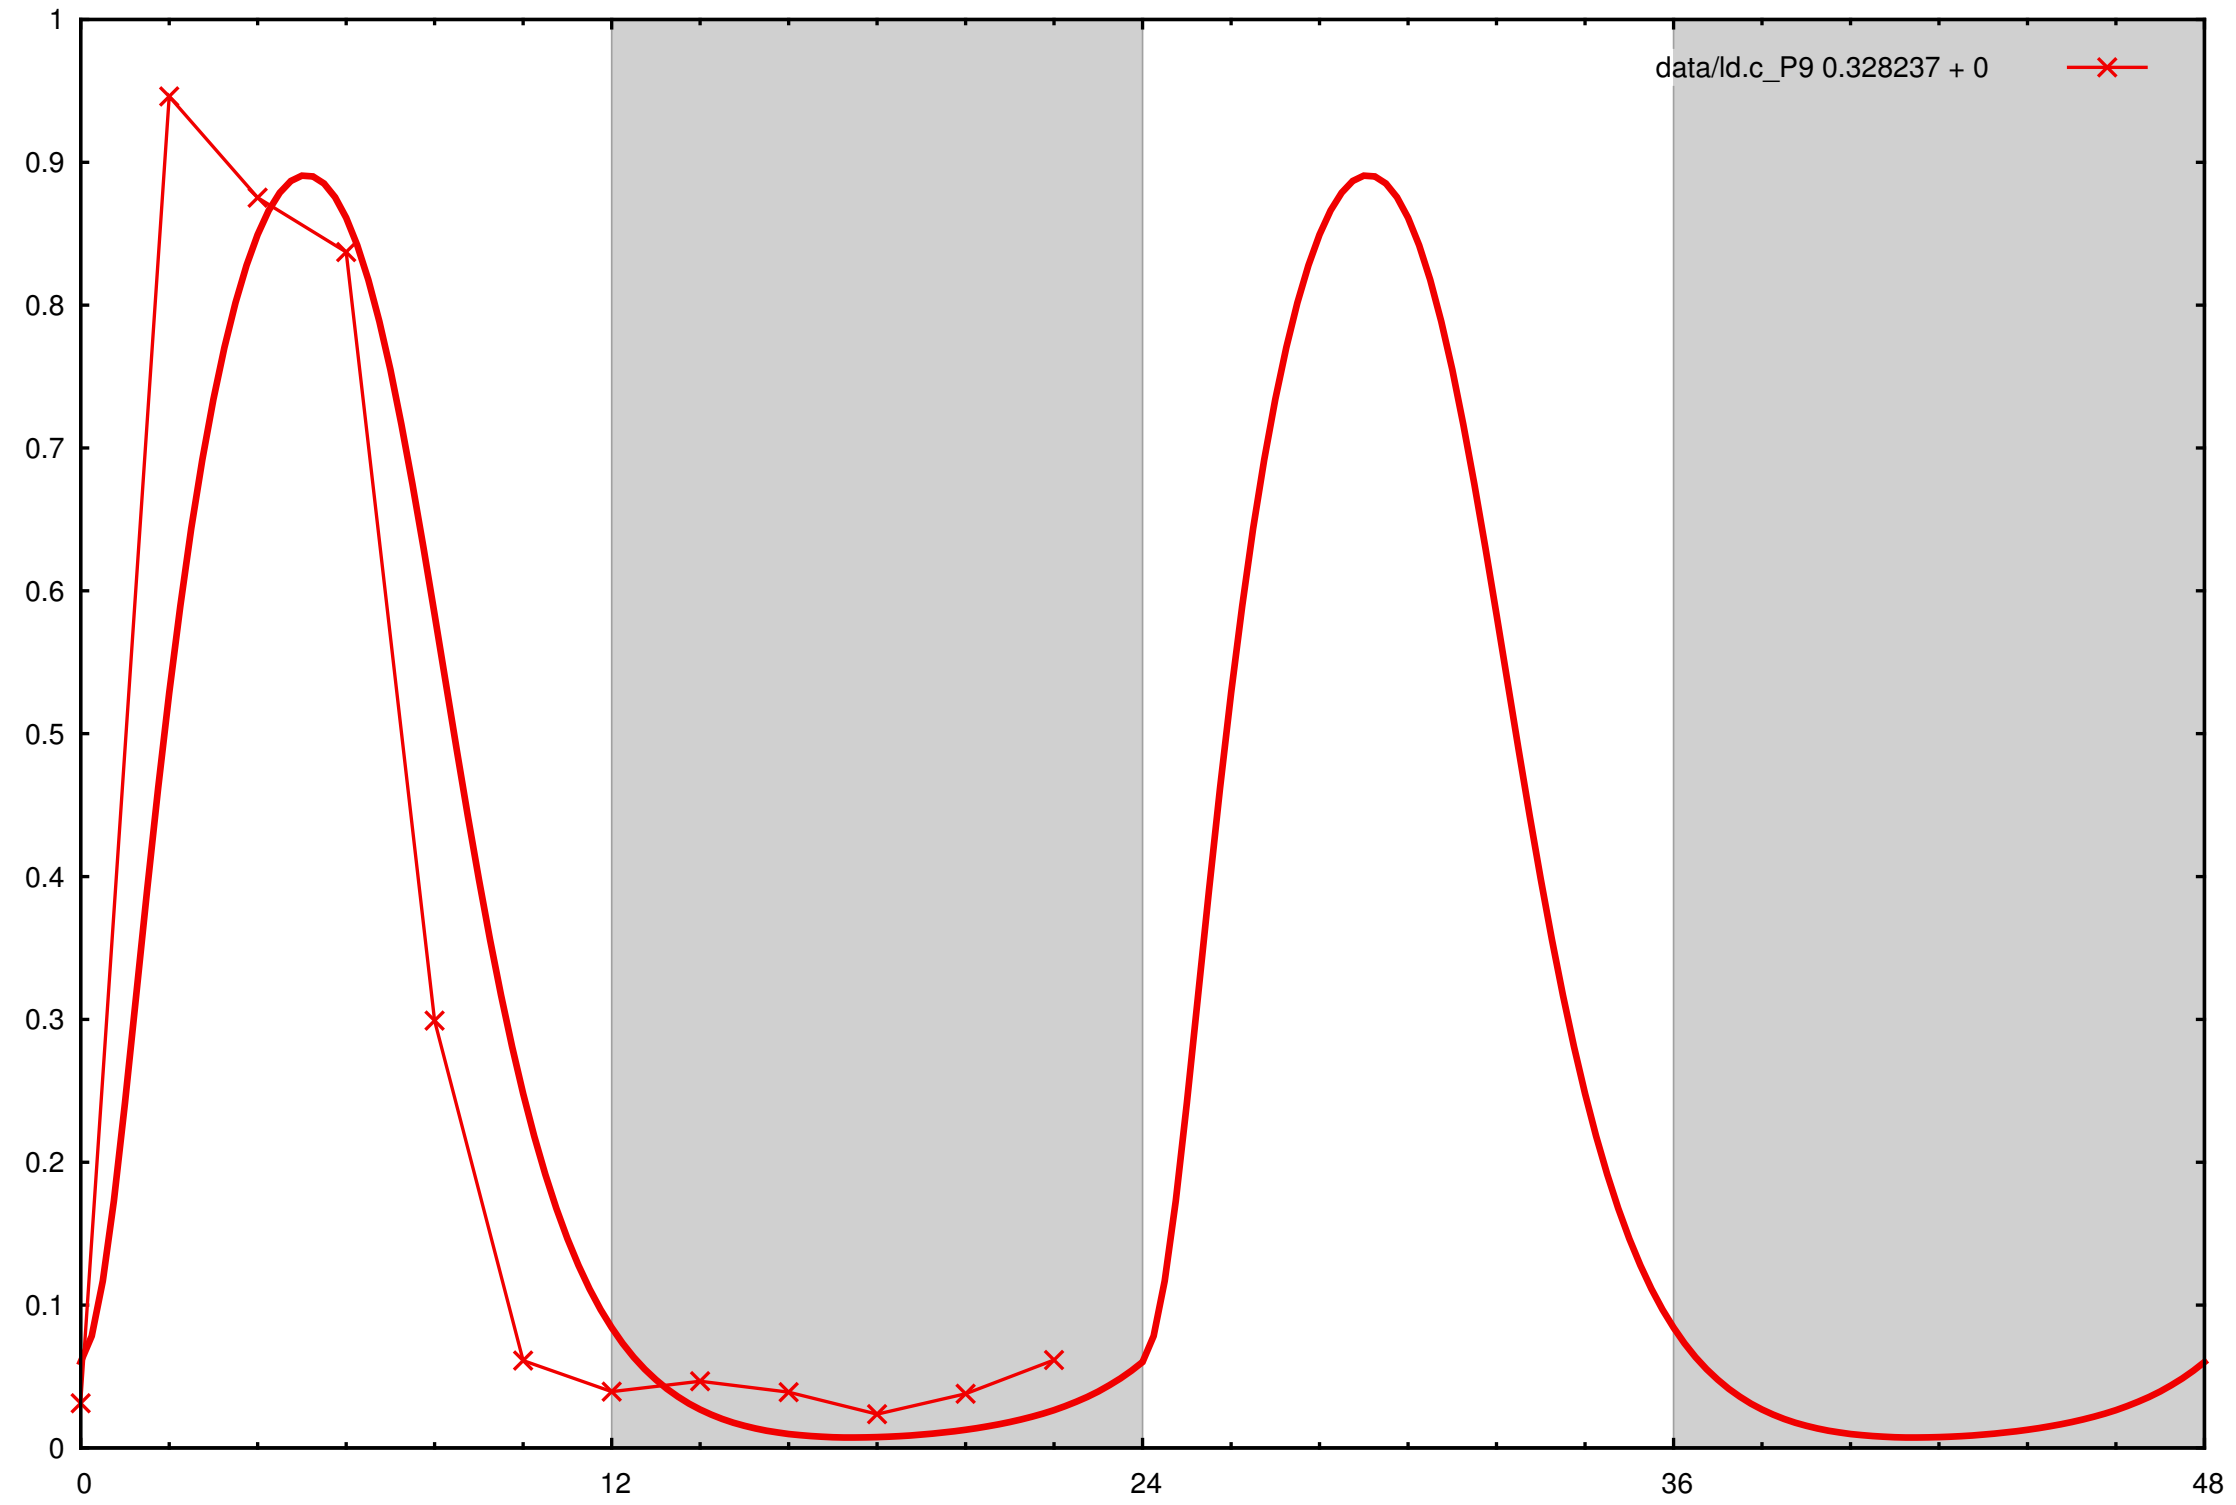

Scale group 314, scost 0

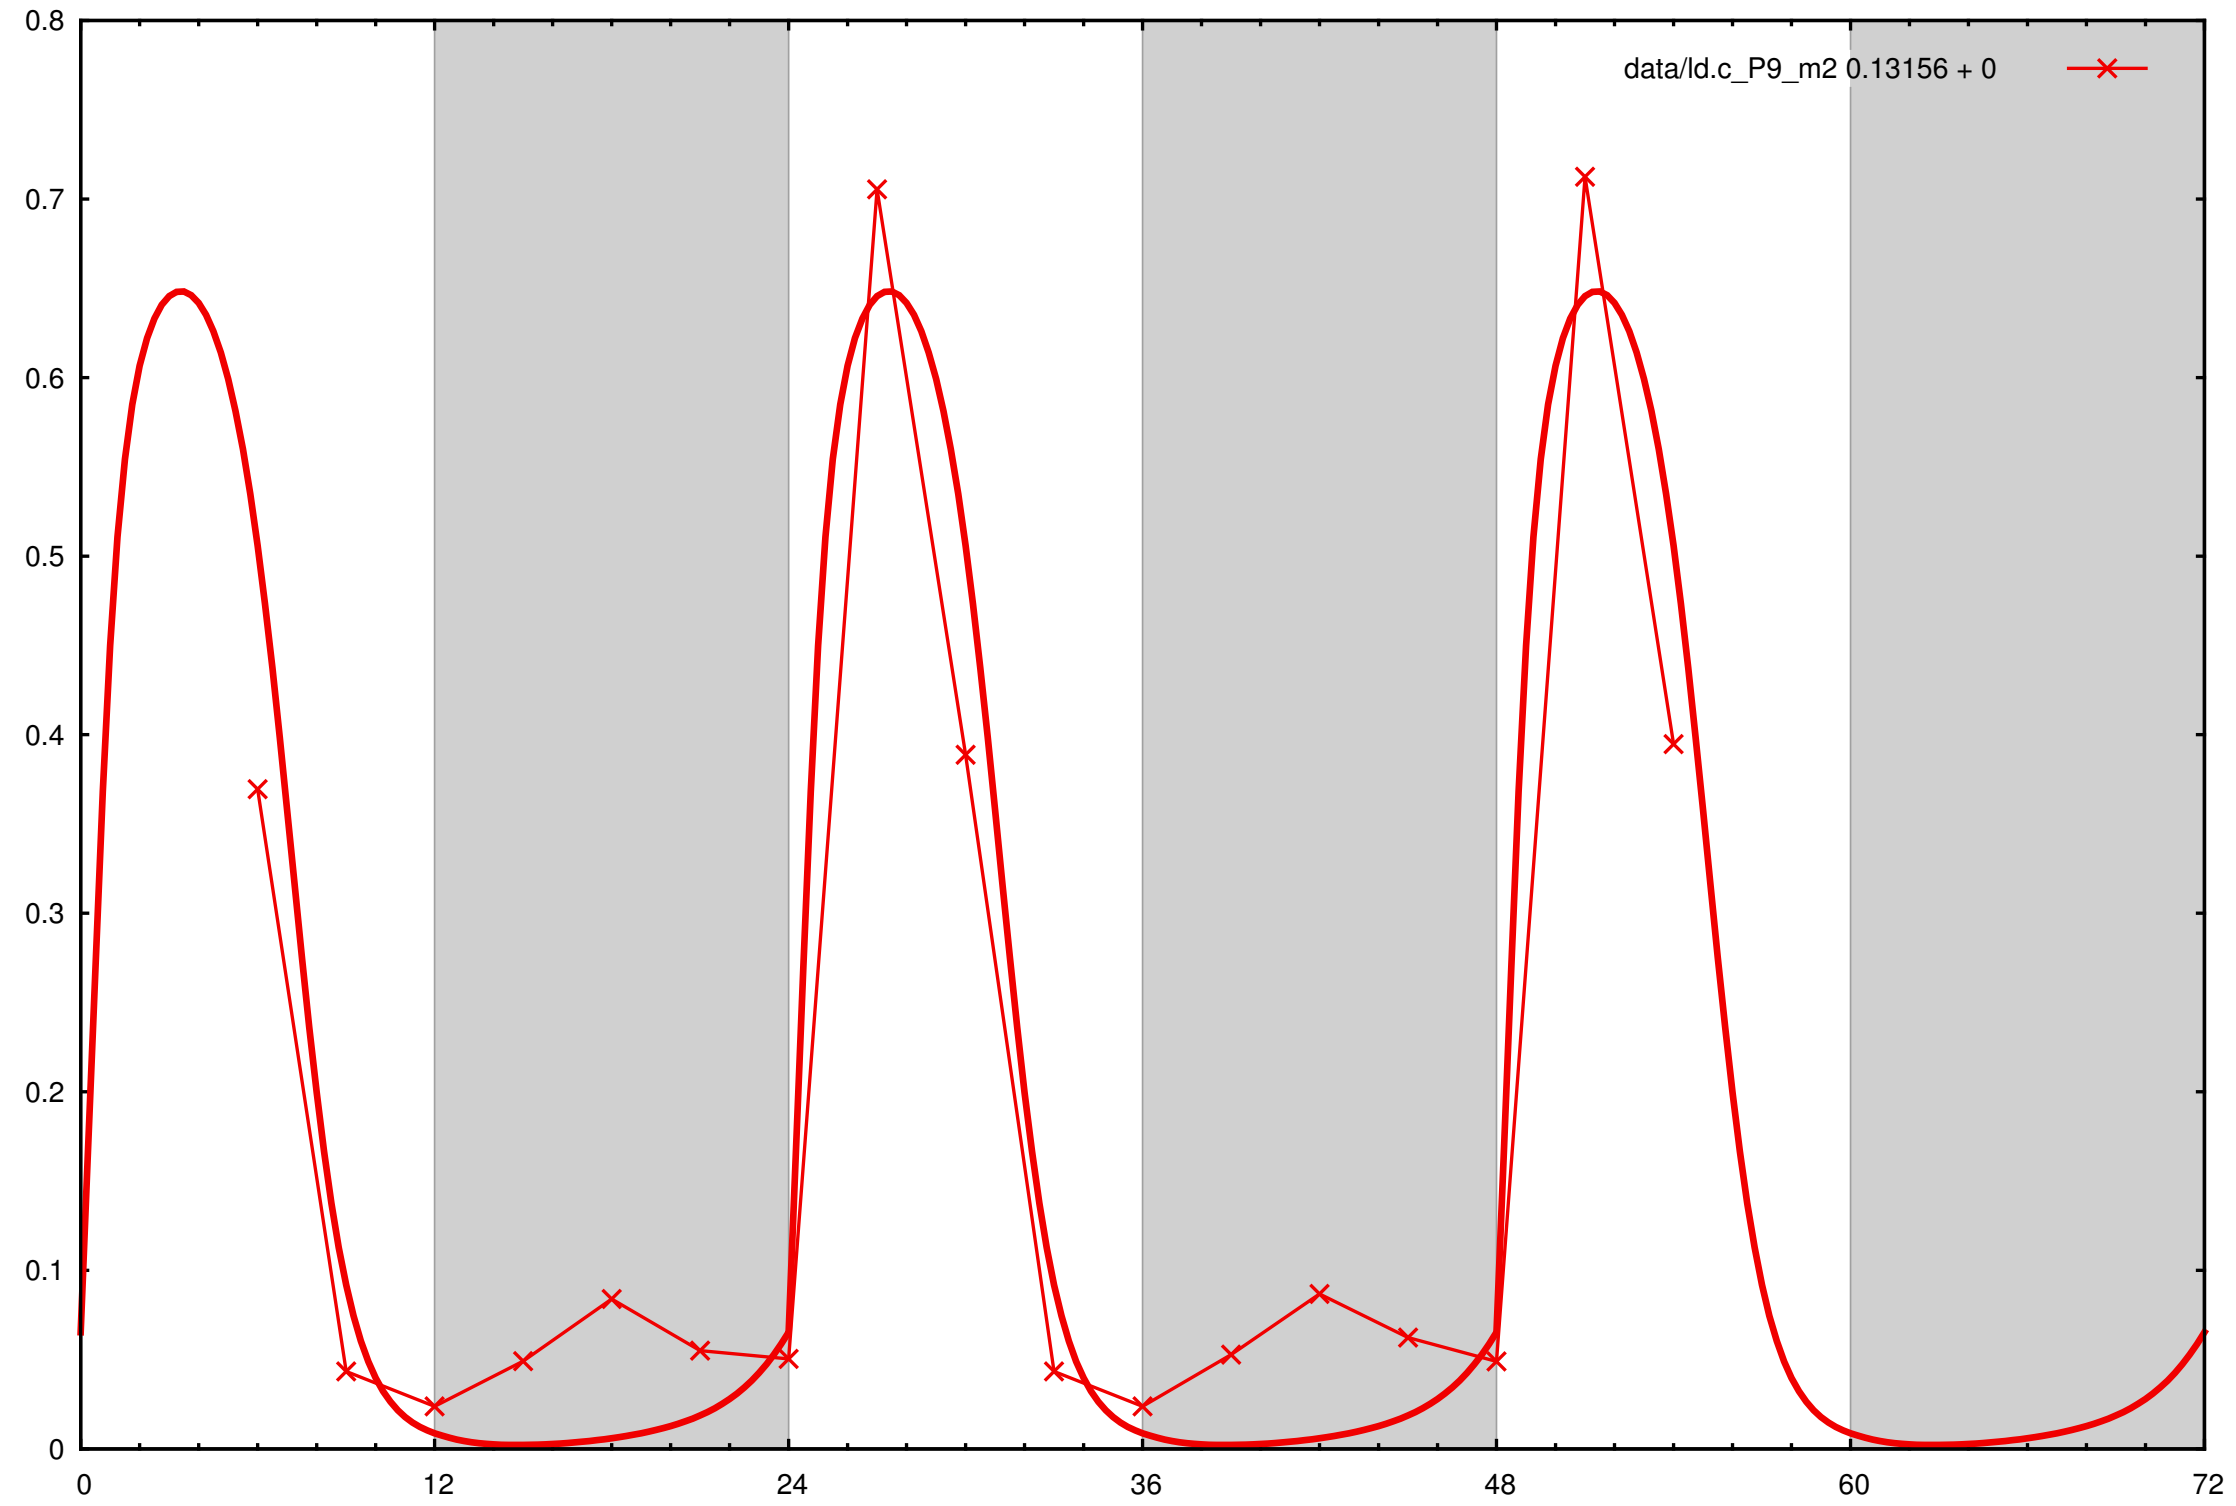

Scale group 315, scost 0

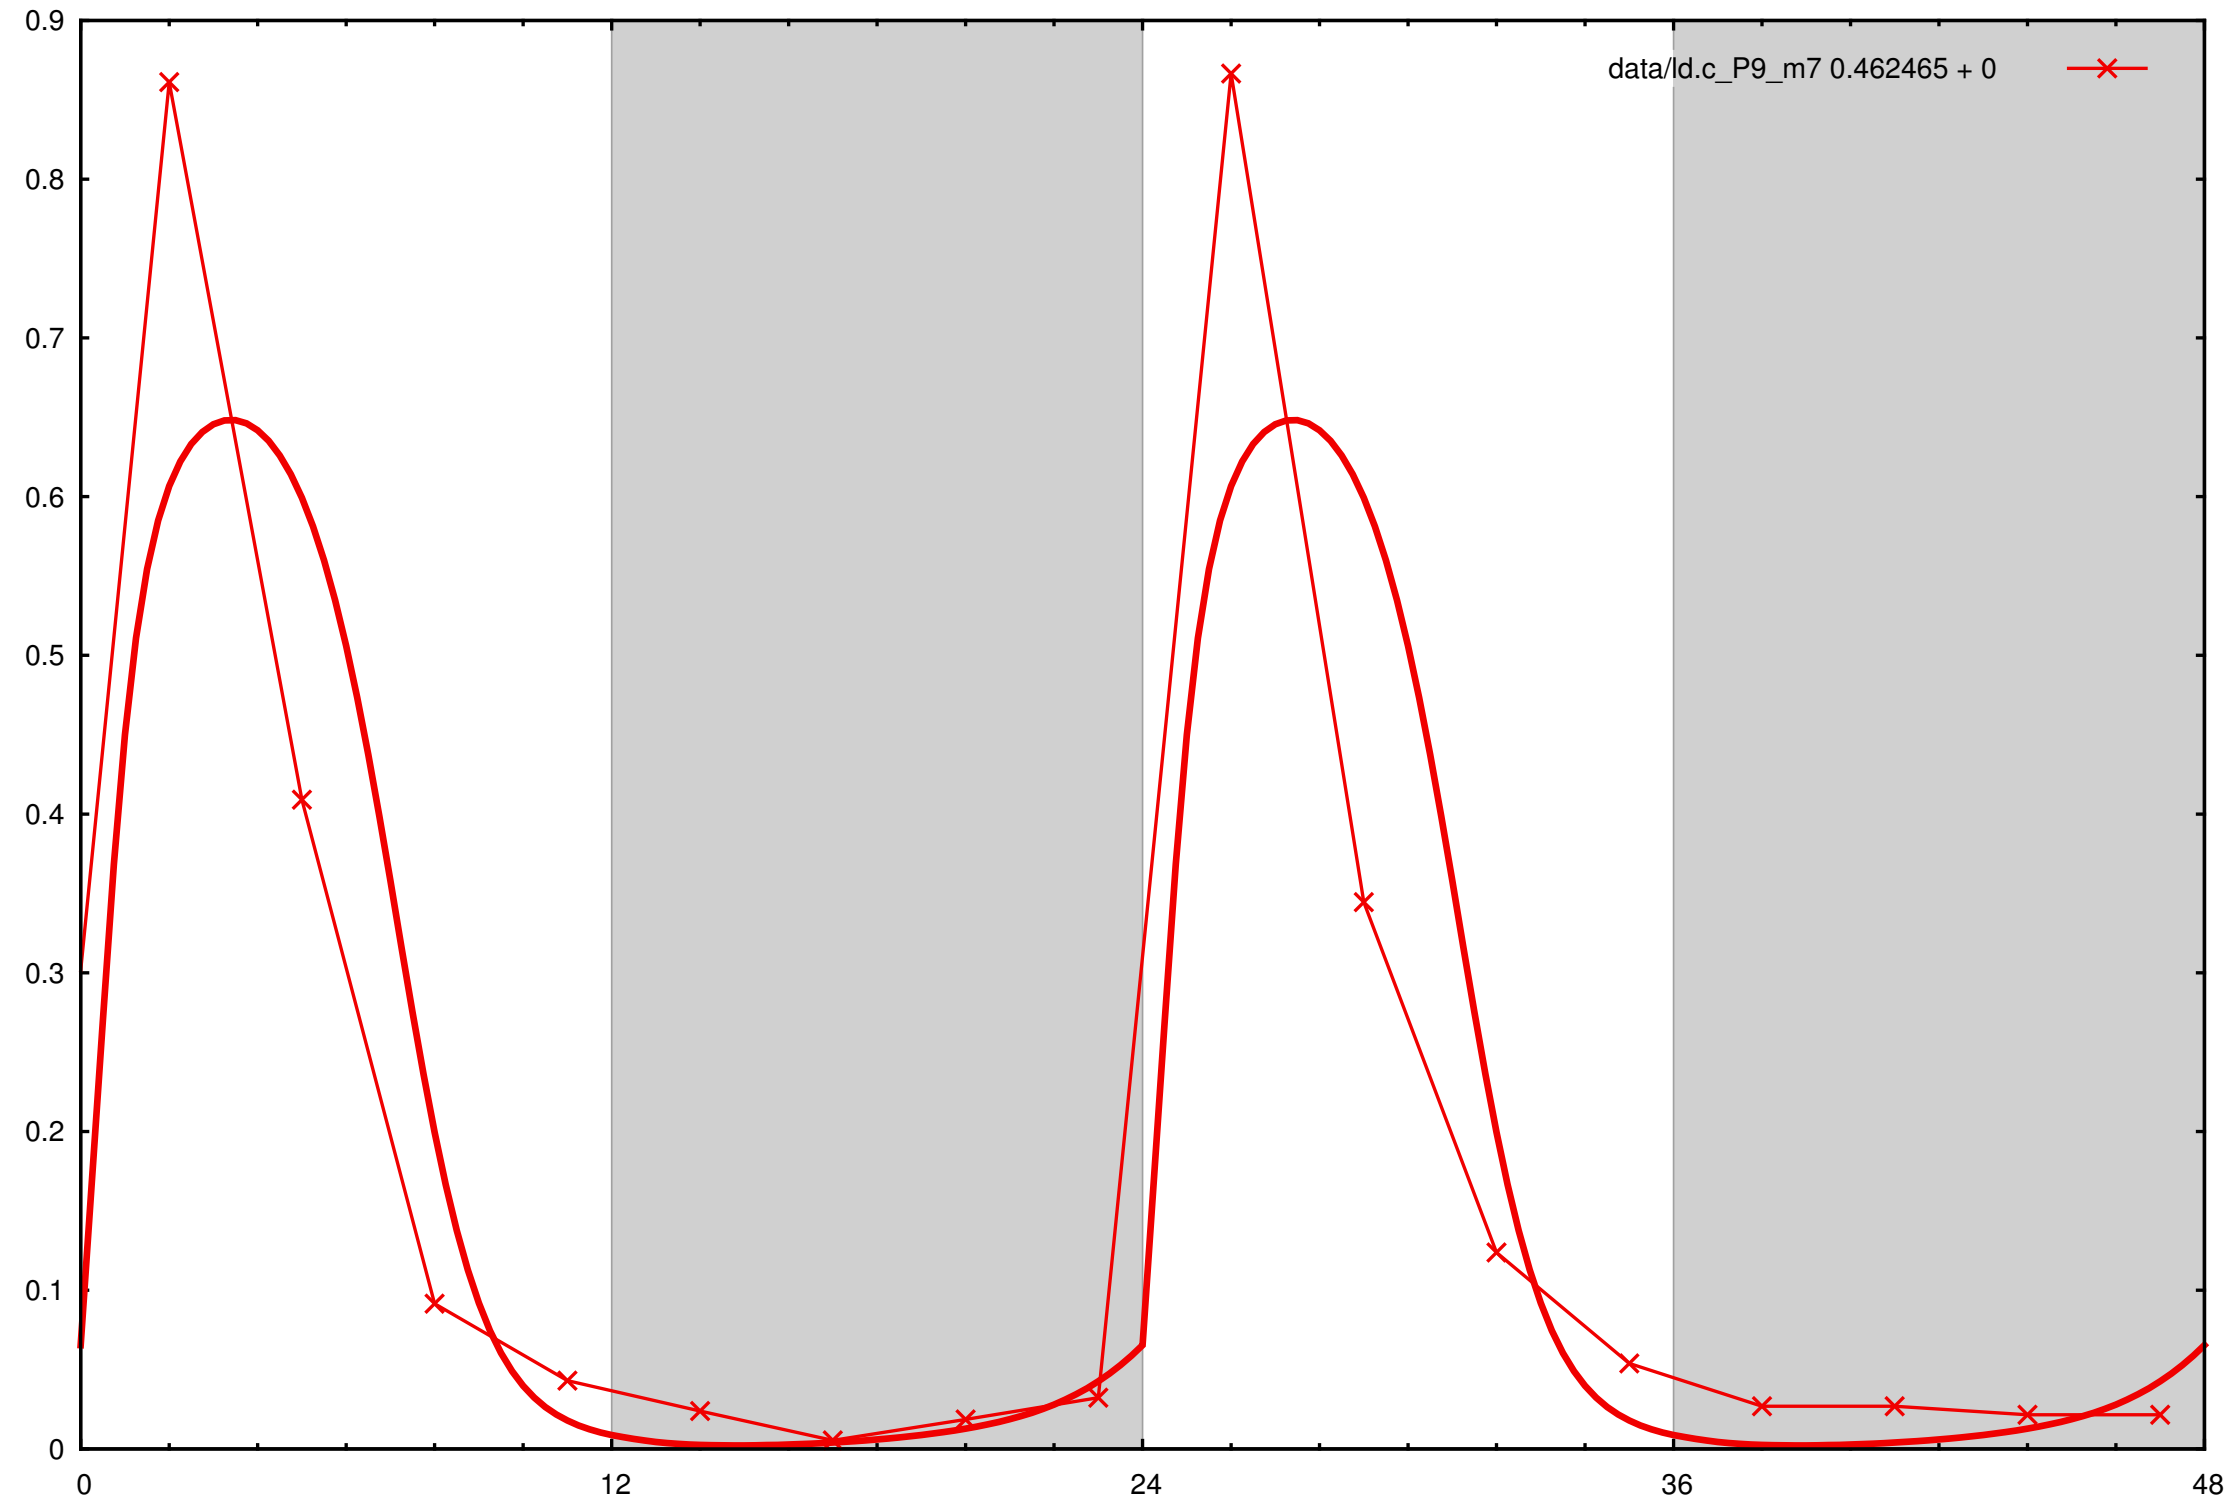

Scale group 316, scost 0

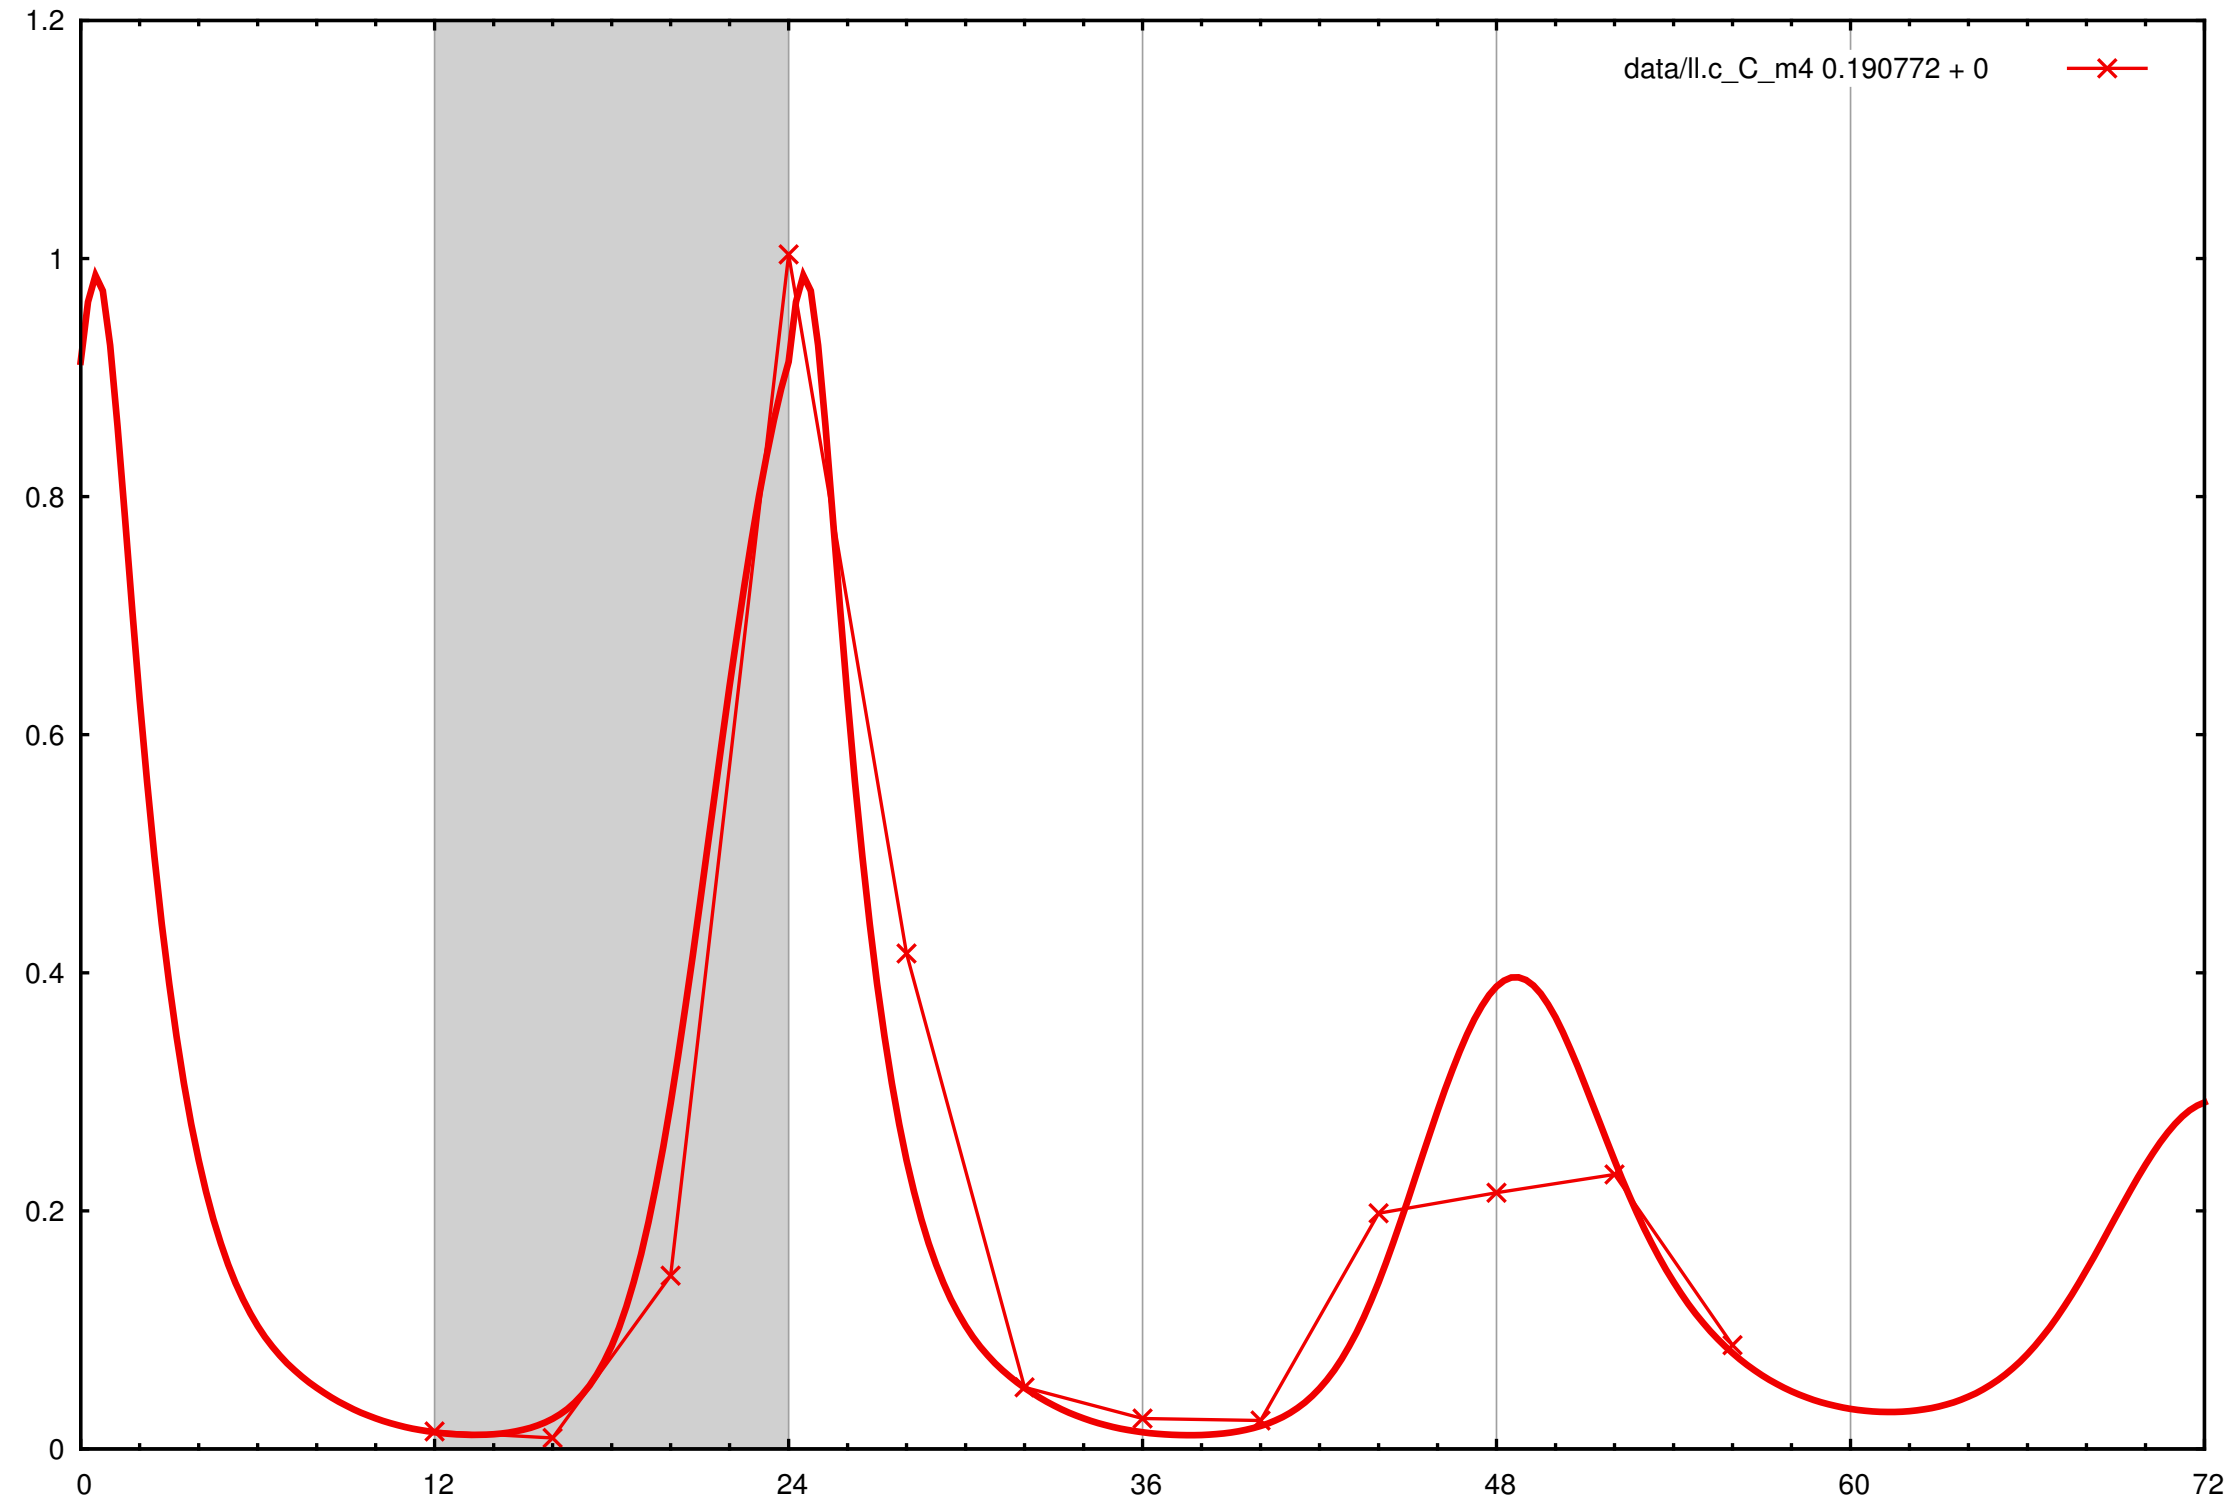

Scale group 317, scost 0

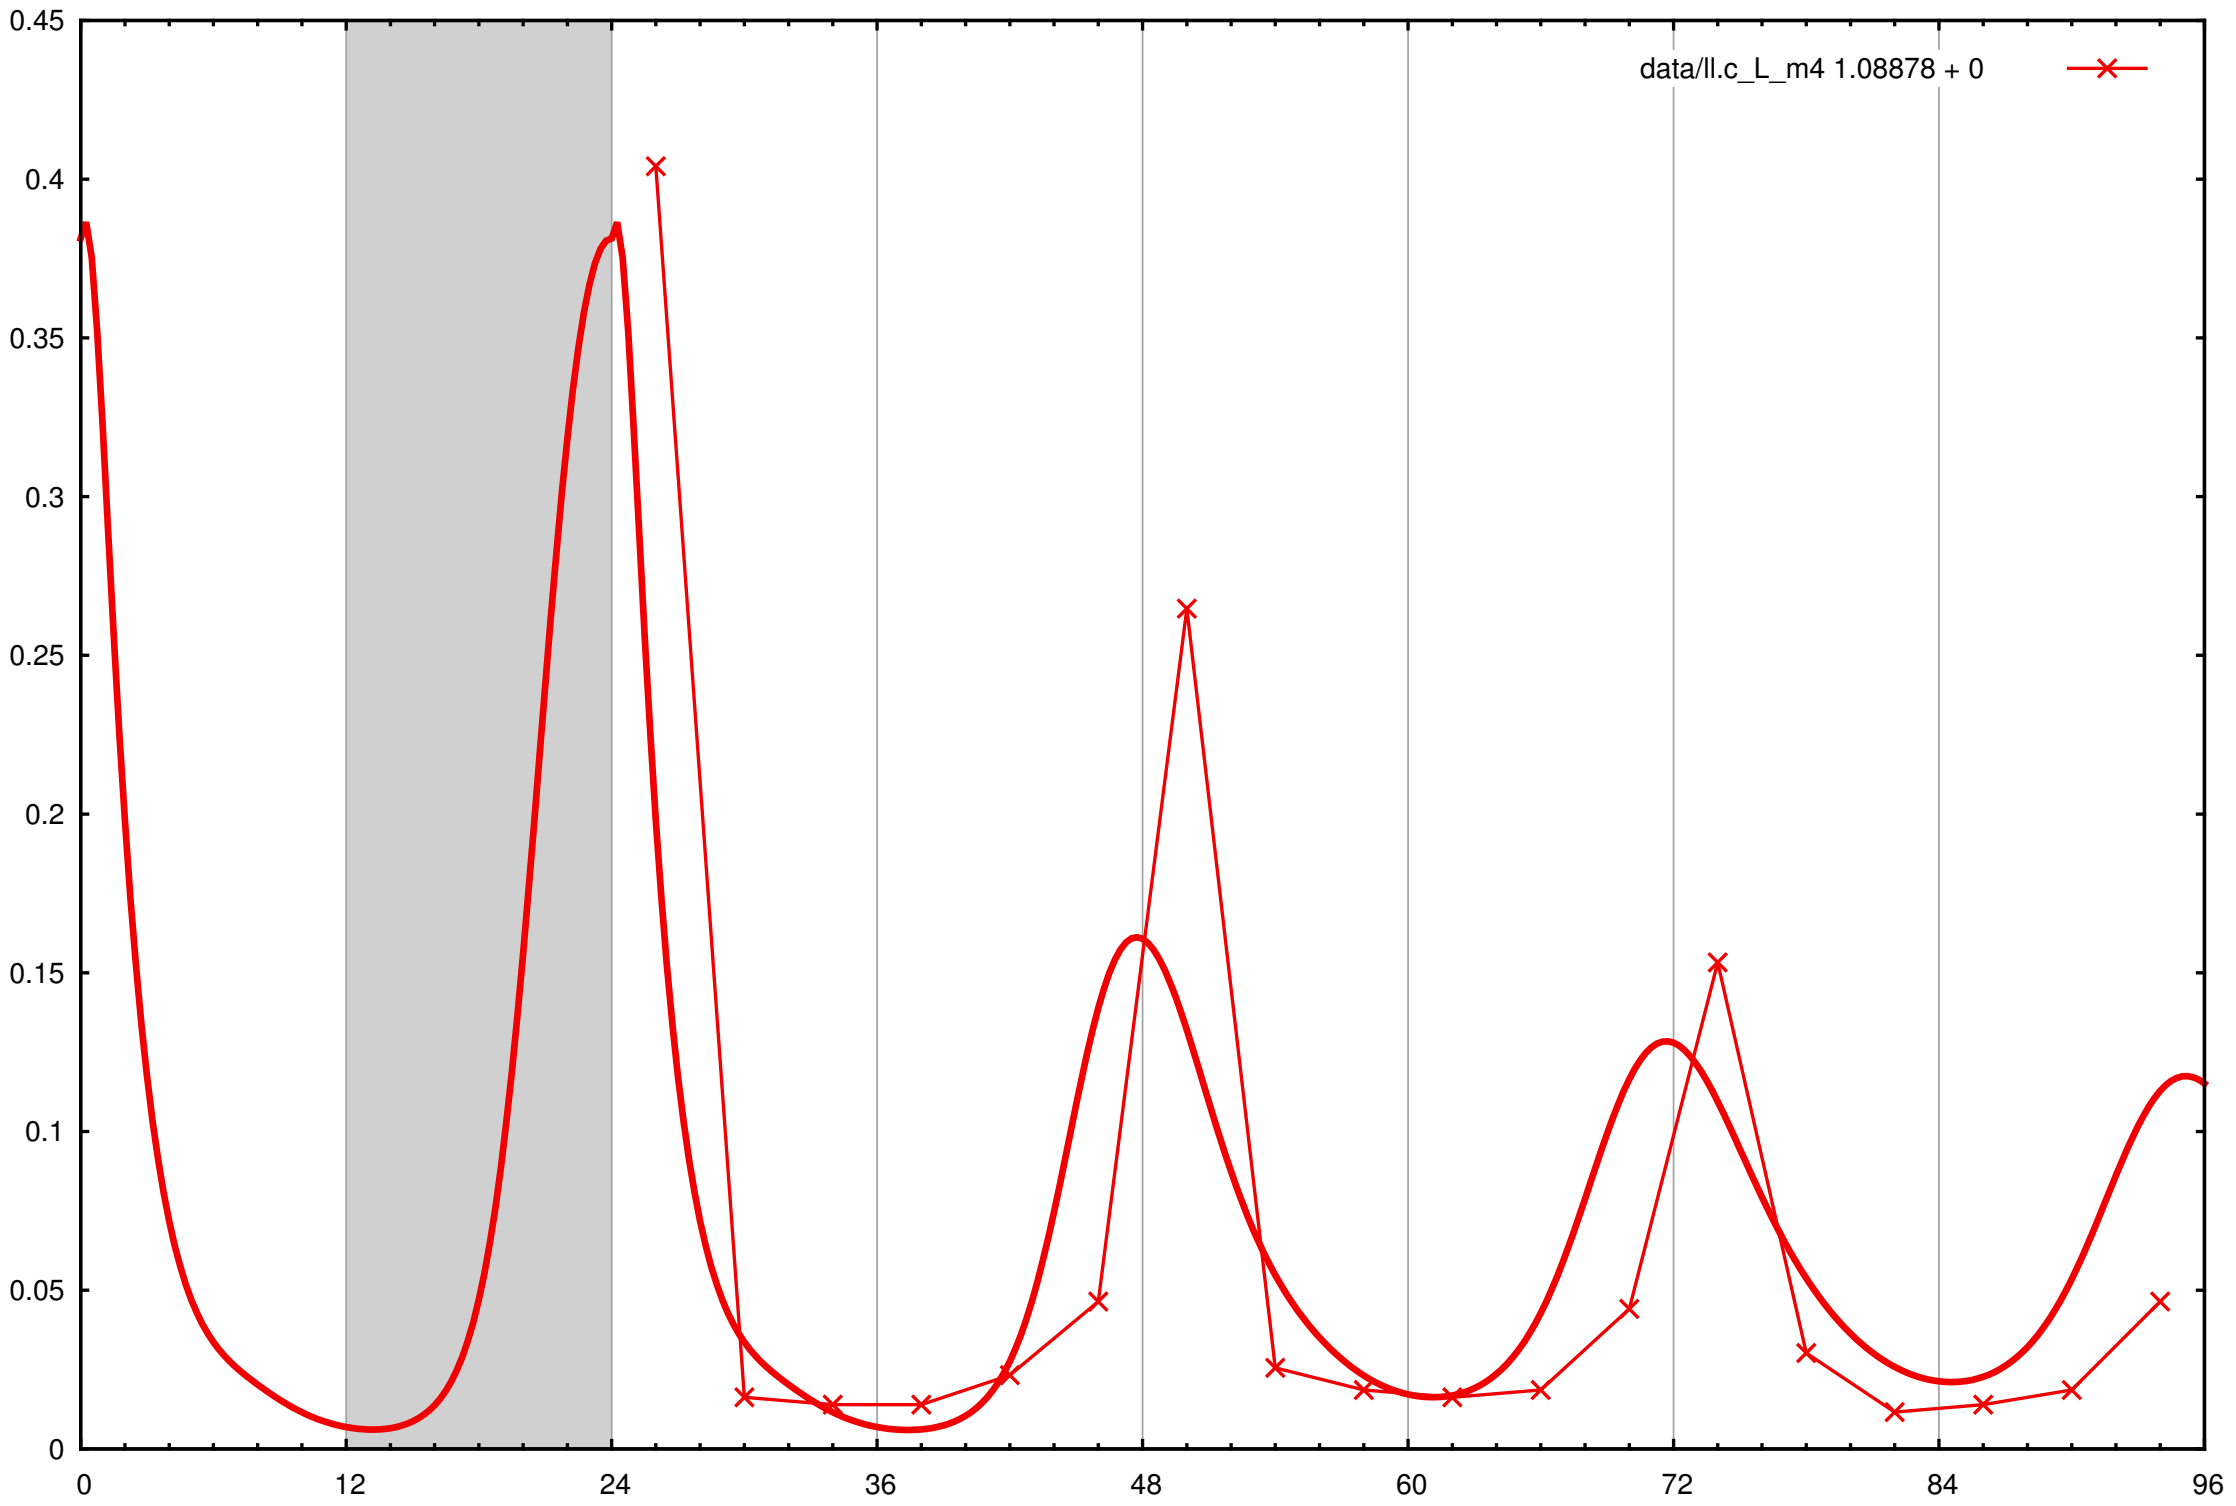

Scale group 318, scost 0

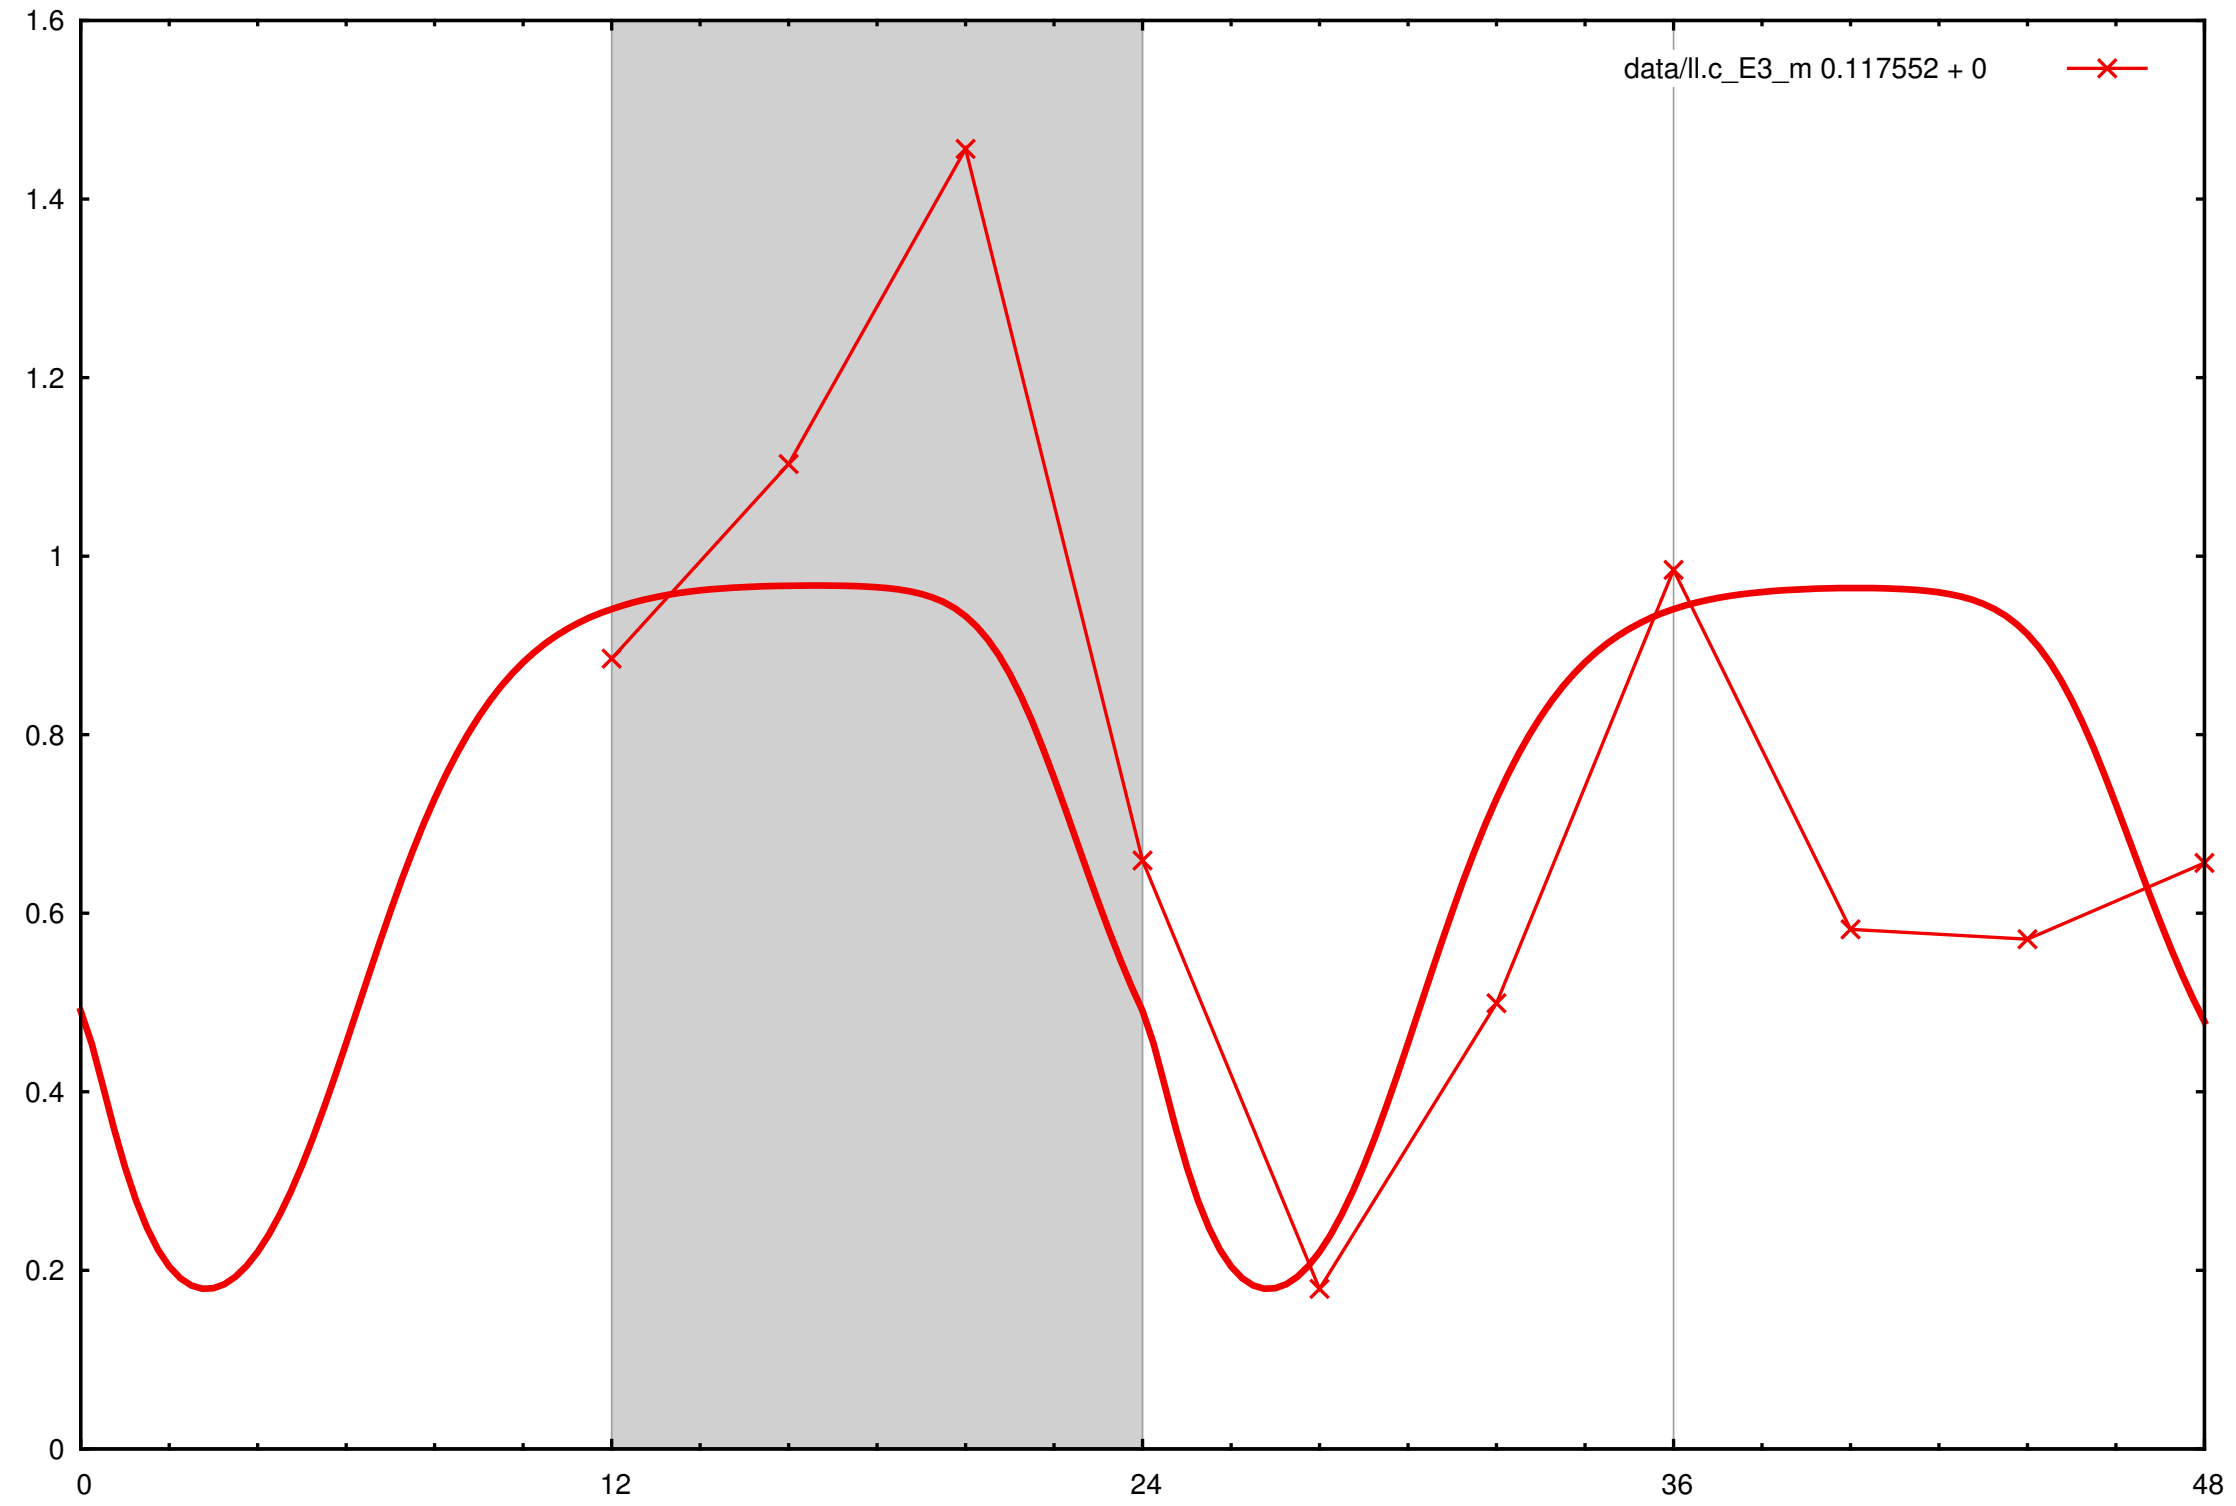

Scale group 319, scost 0

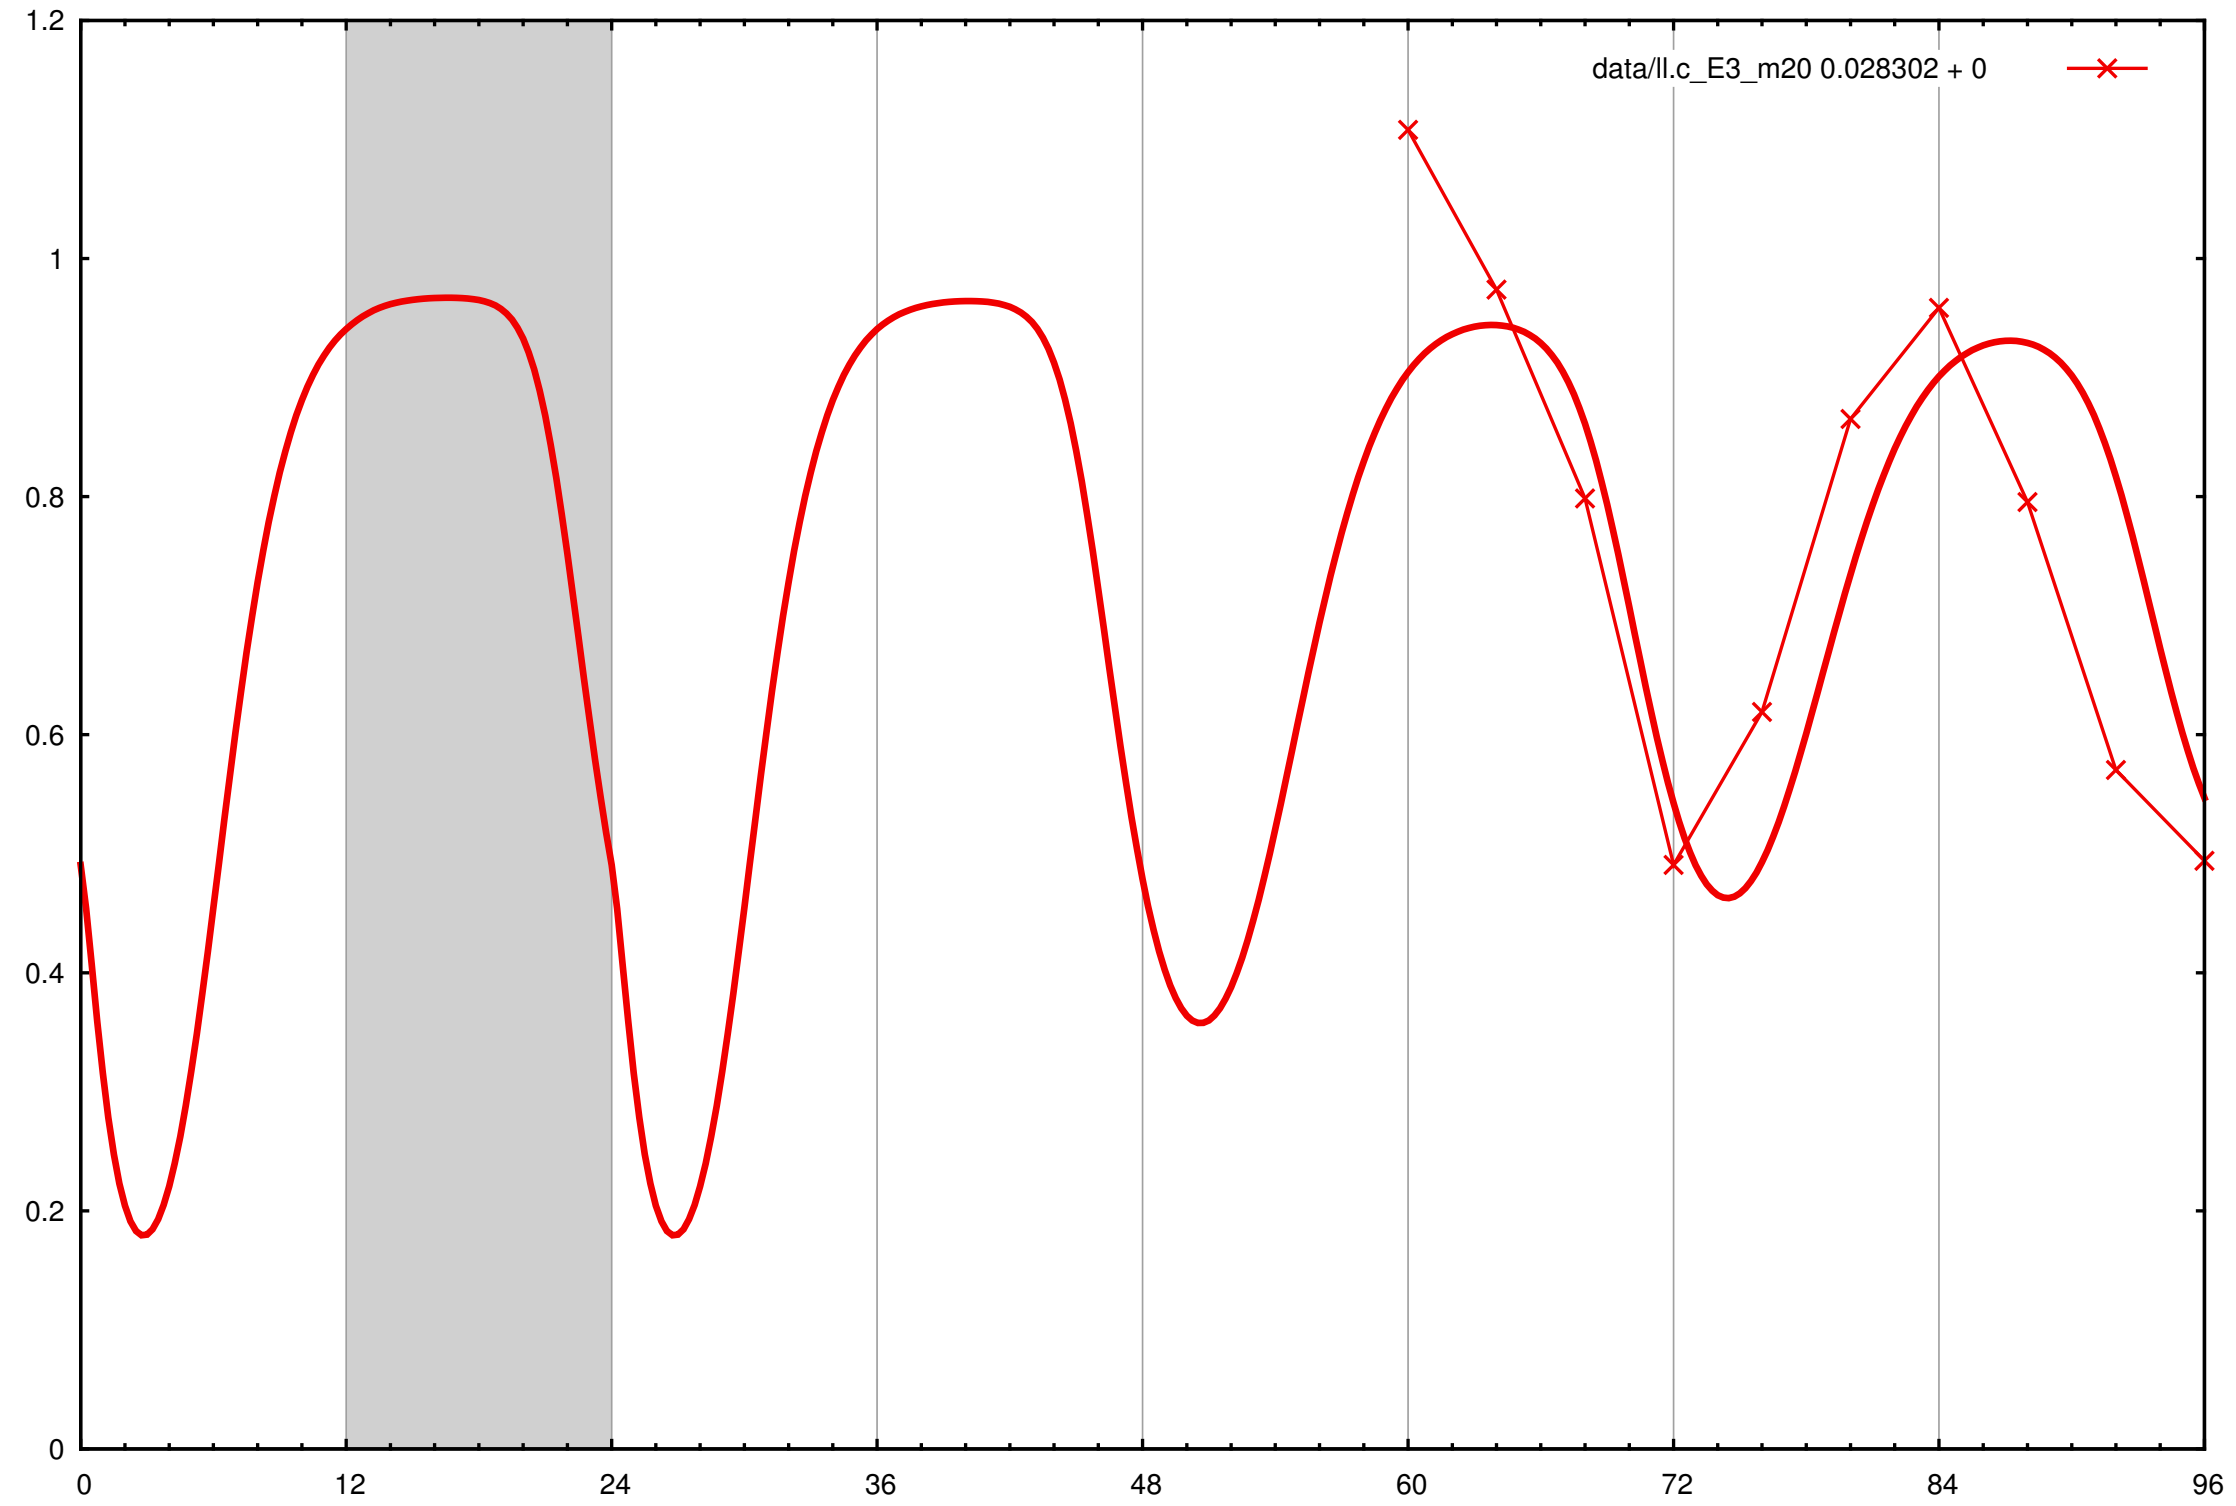

Scale group 320, scost 0

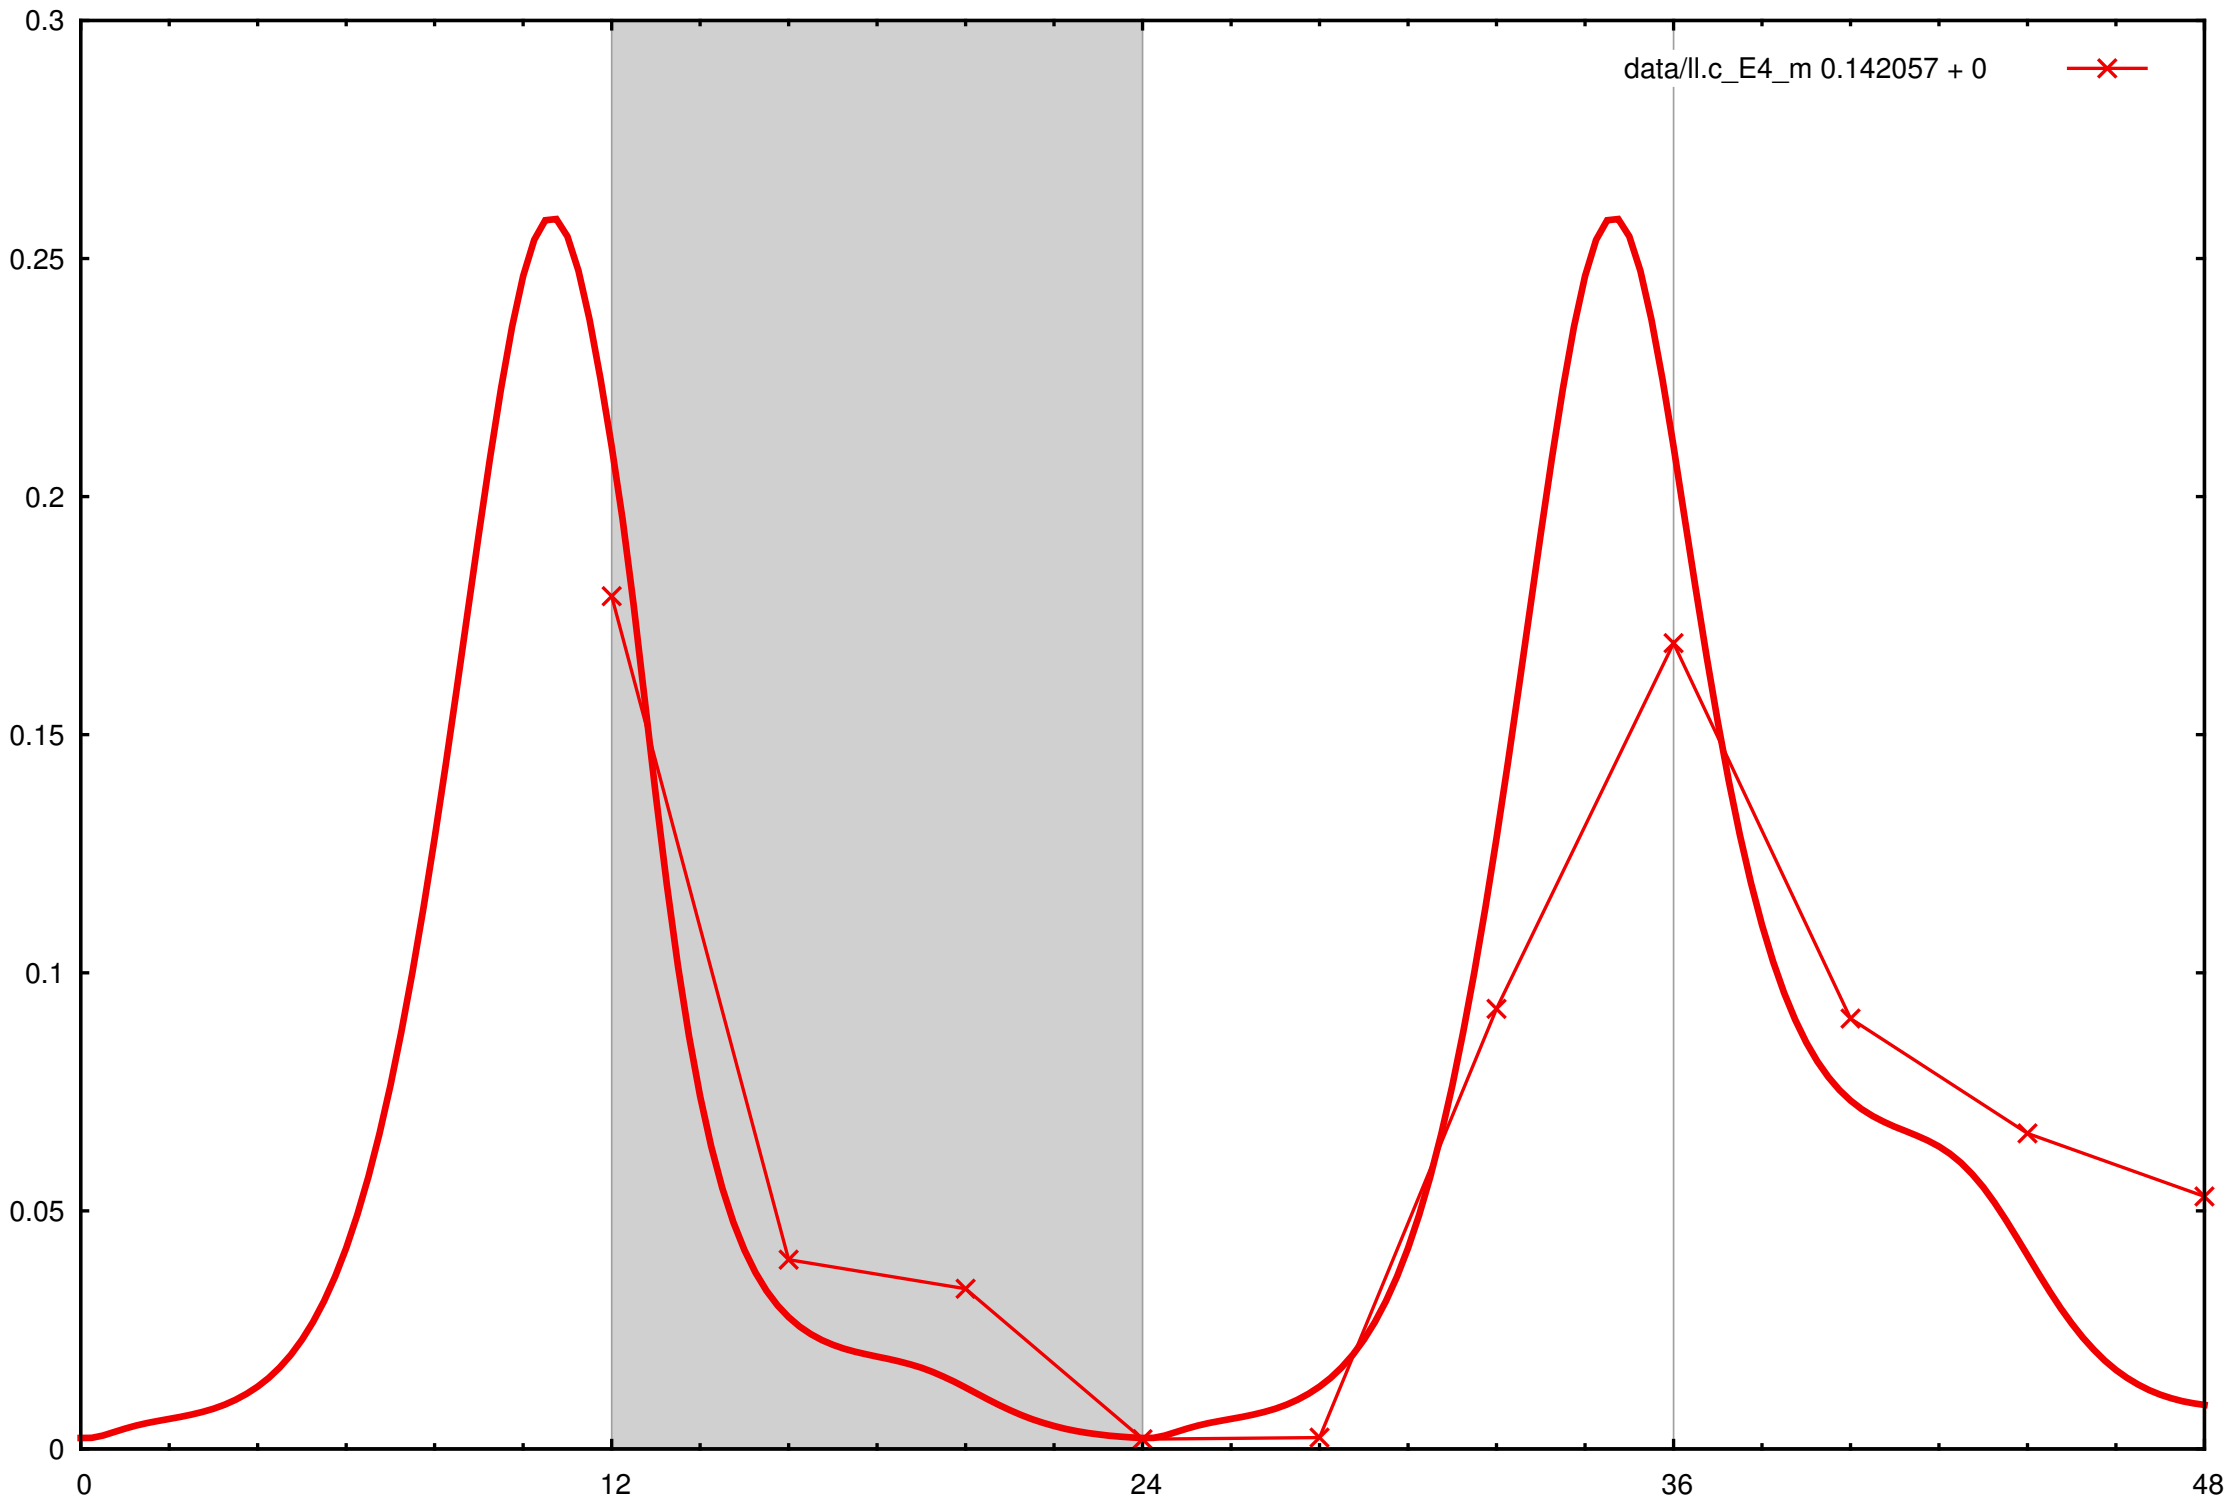



Scale group 321, scost 0

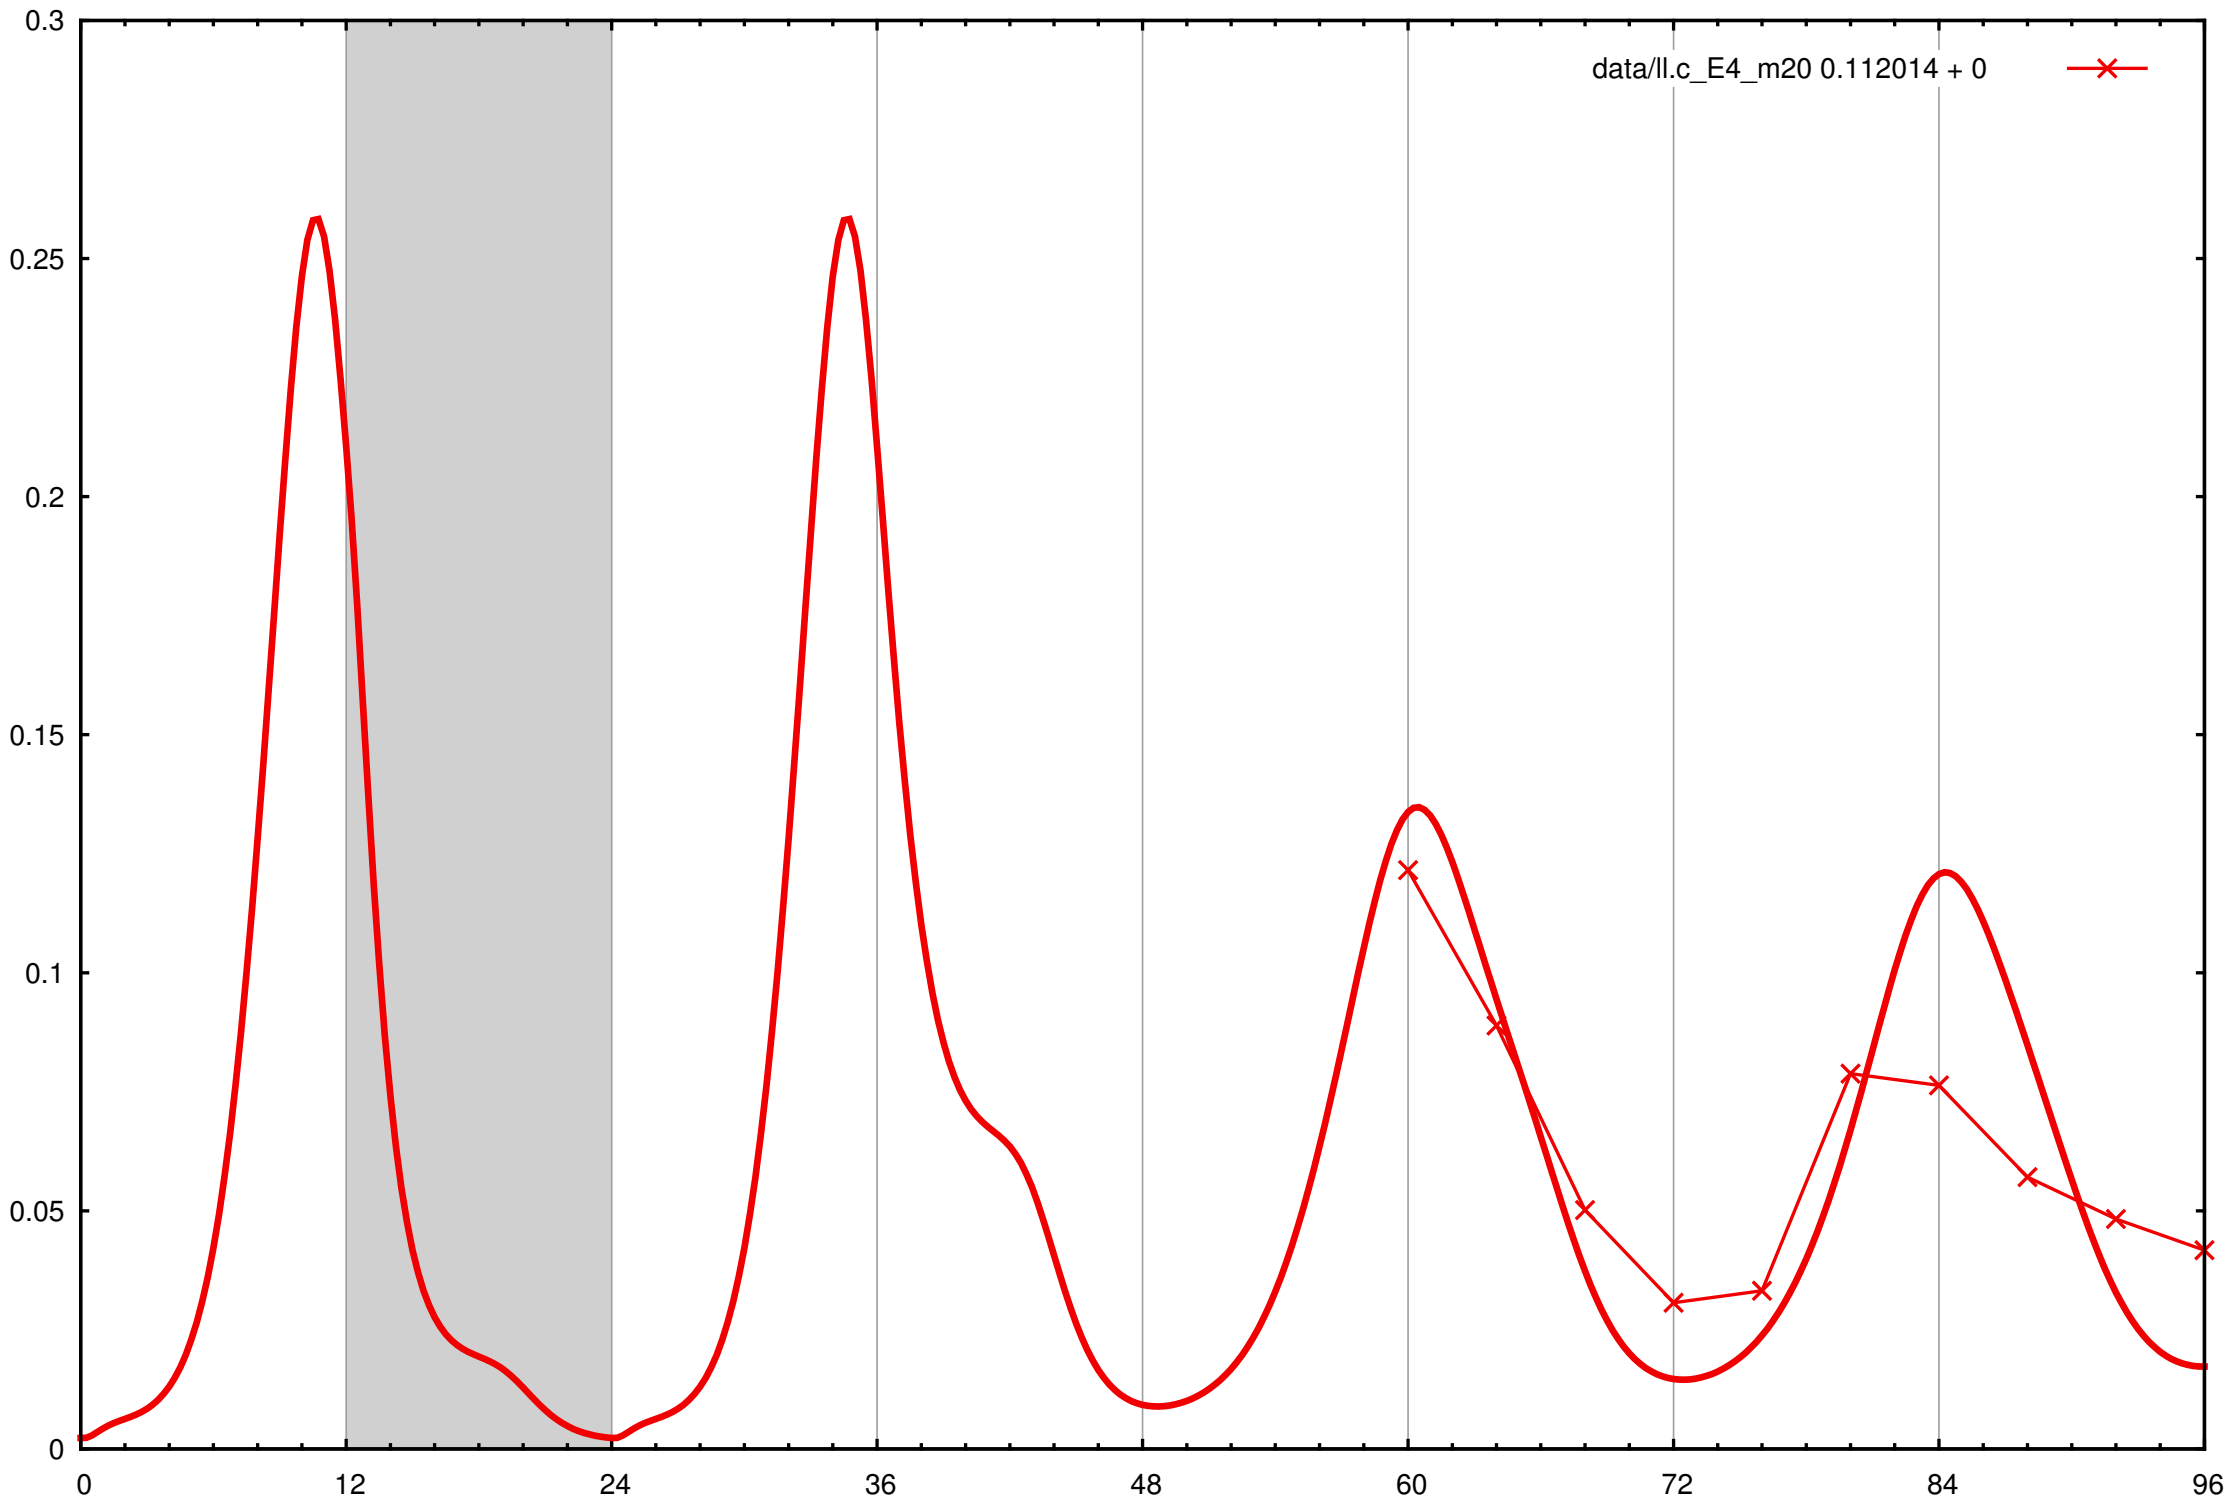

data//l.c\_E4\_m20 0.112014 + 0

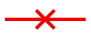

Scale group 322, scost 0

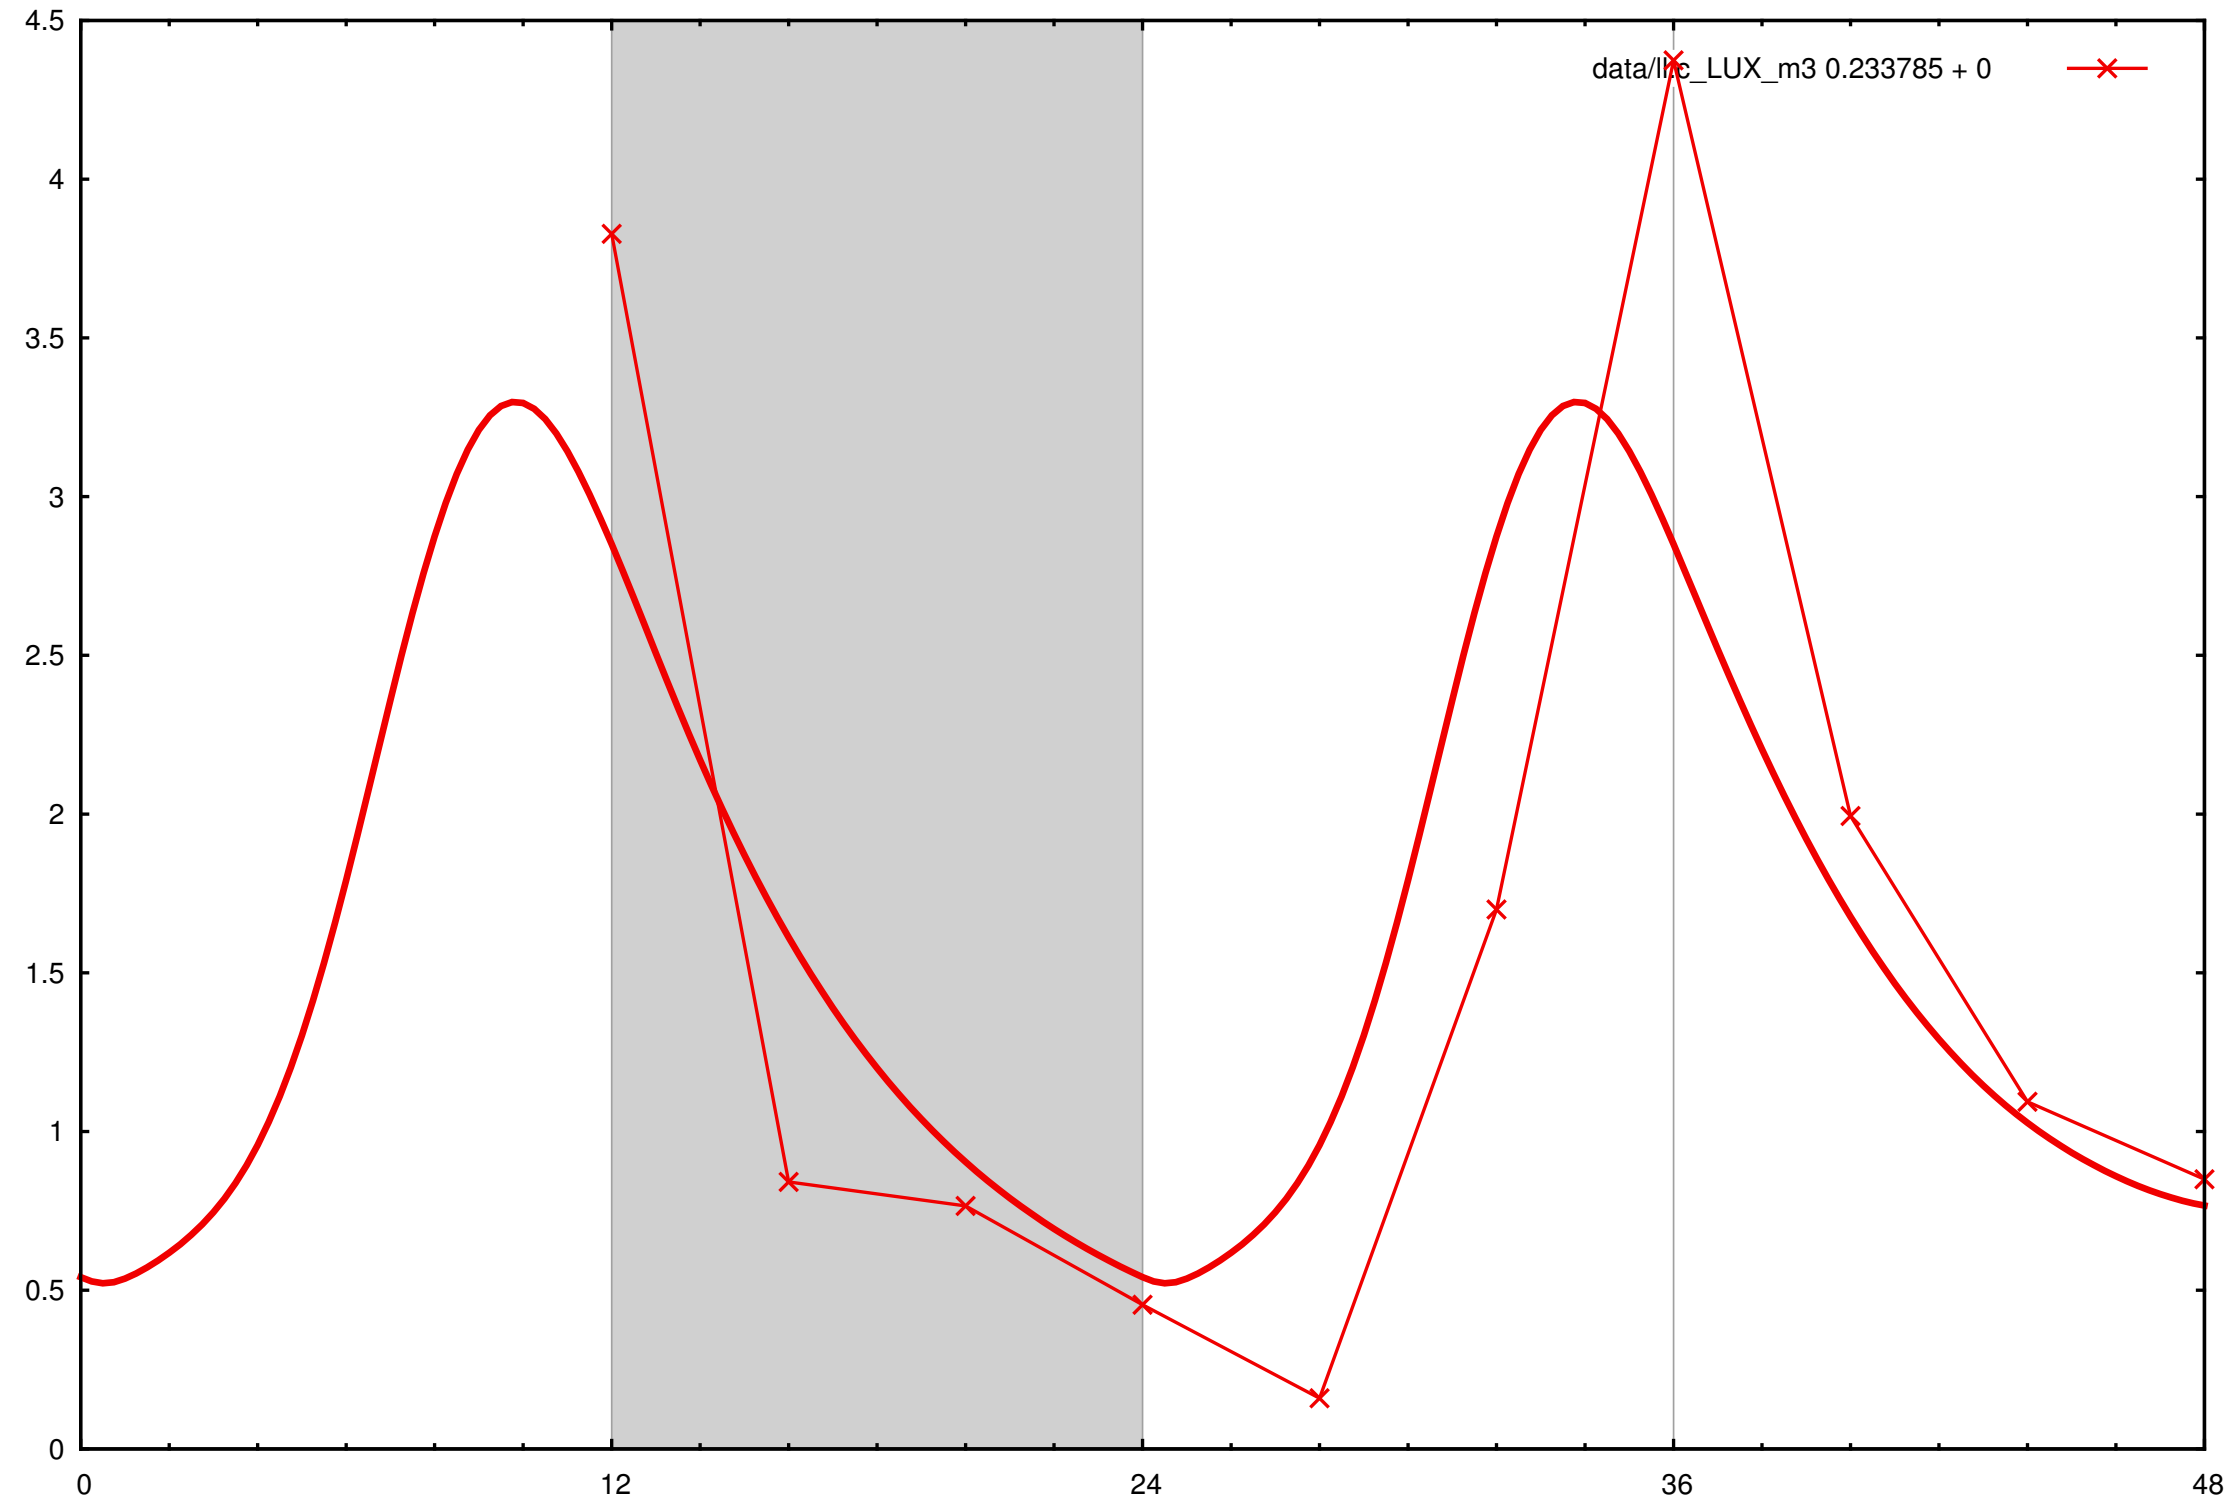

data/lhc\_LUX\_m3 0.233785 + 0

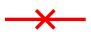

Scale group 323, scost 0

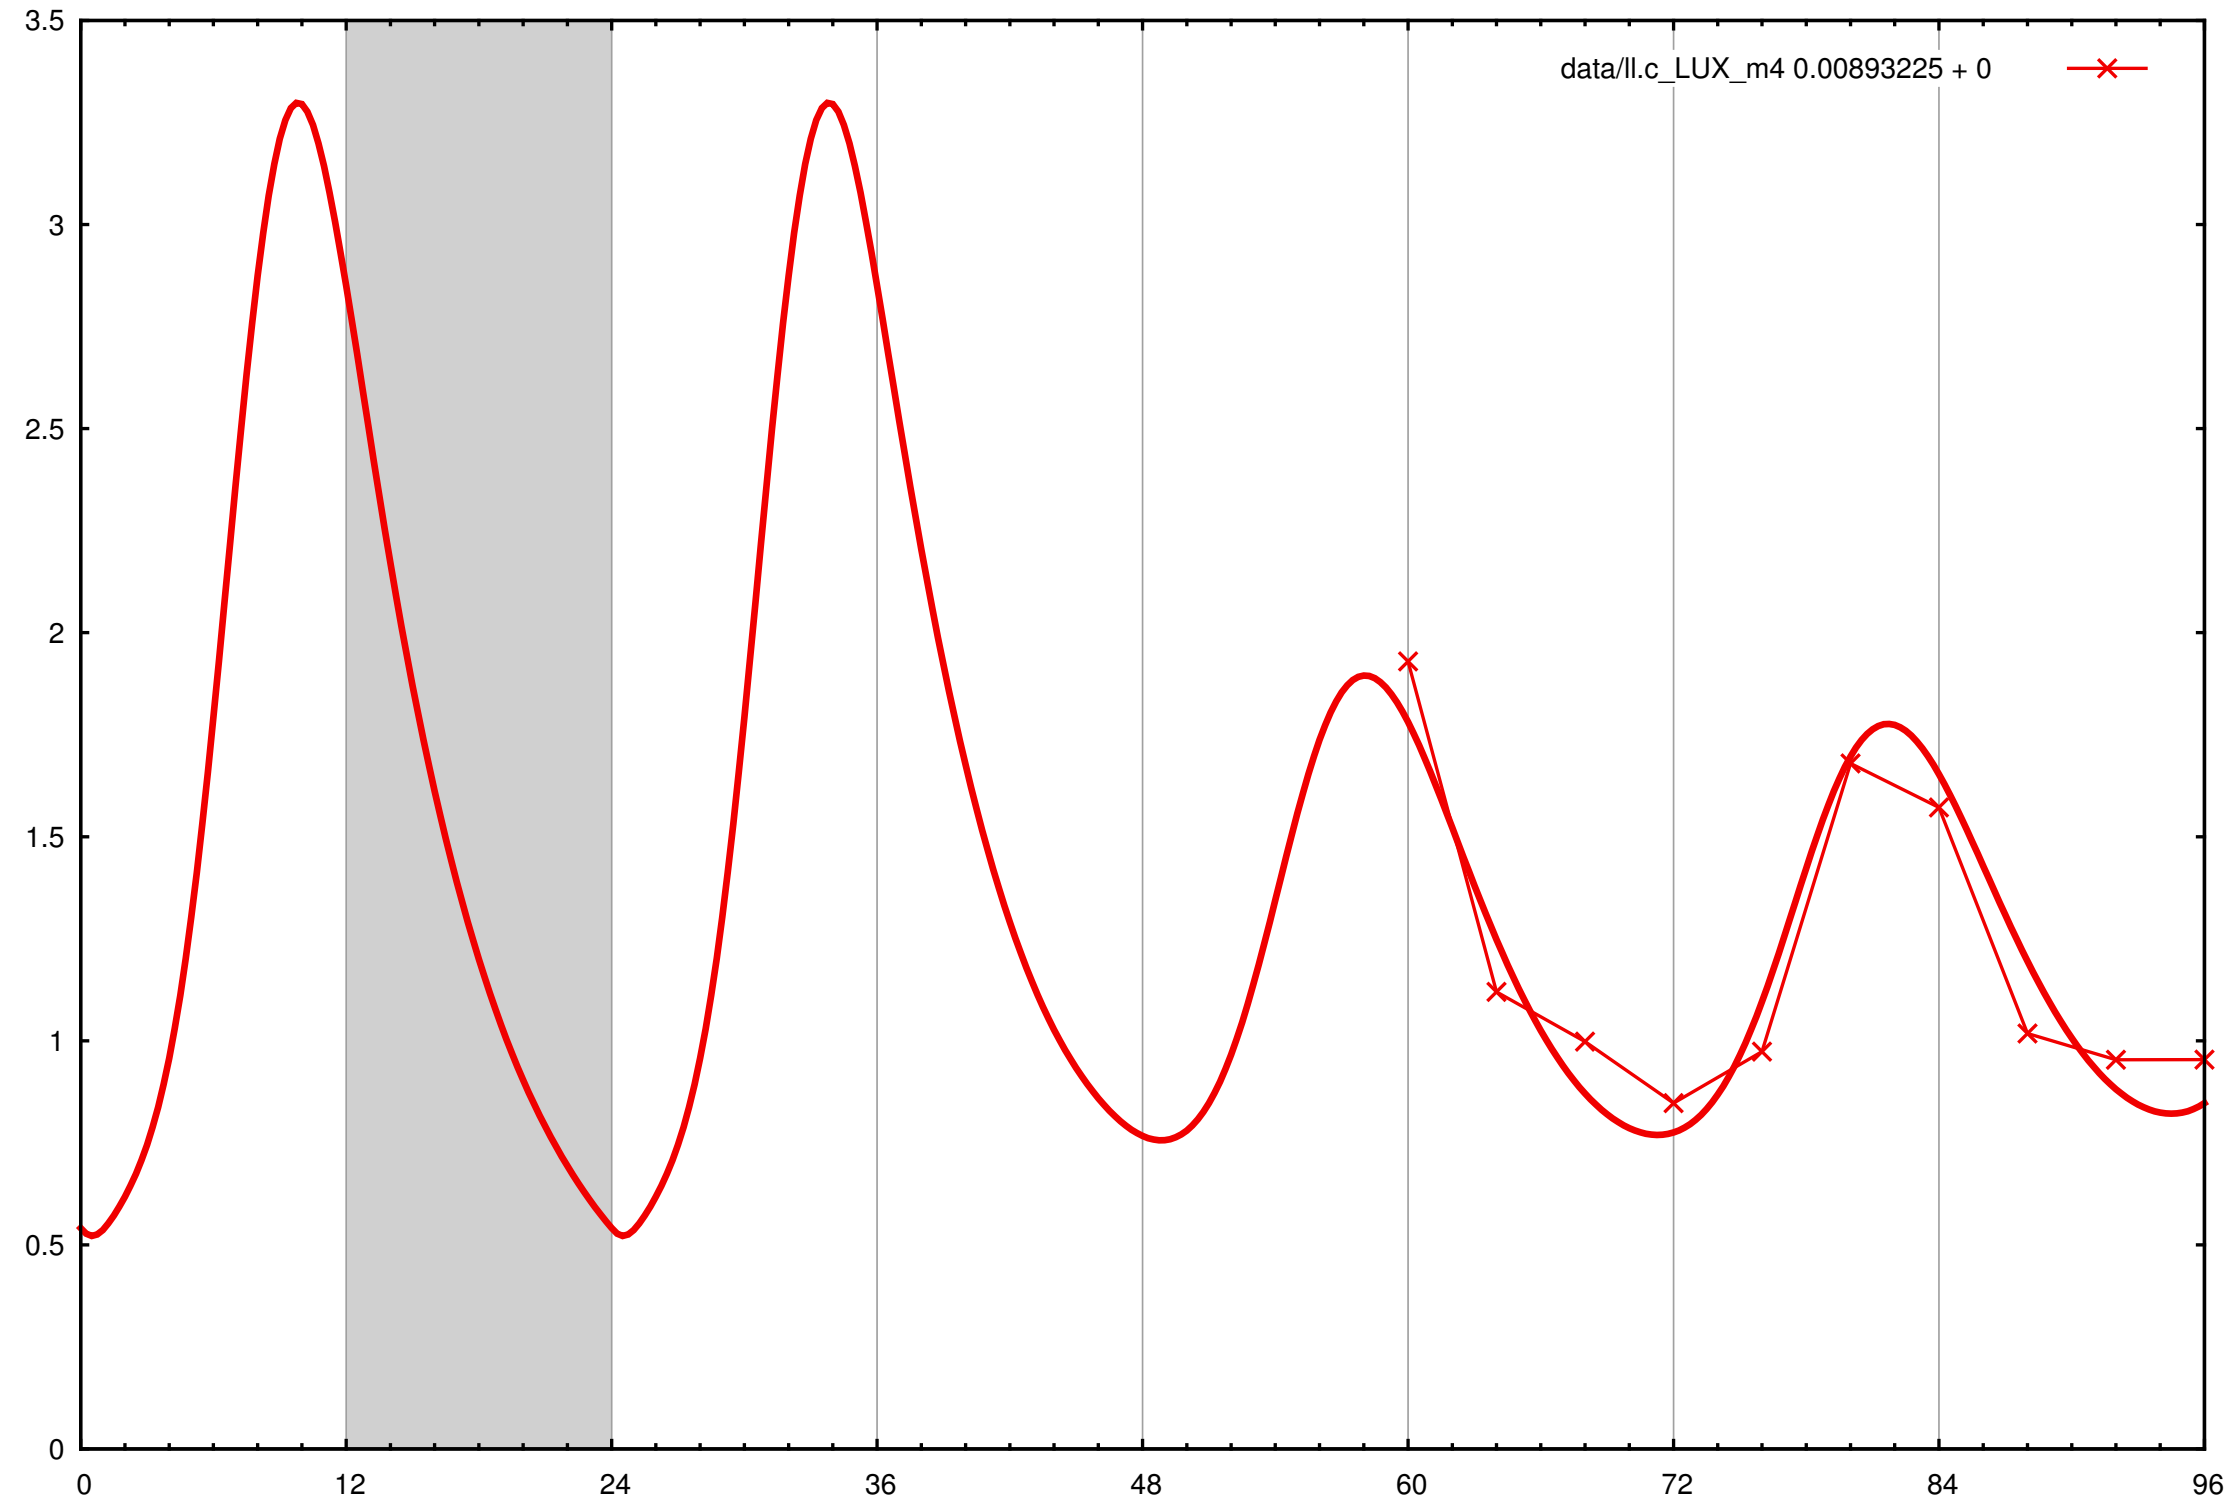

Scale group 324, scost 0

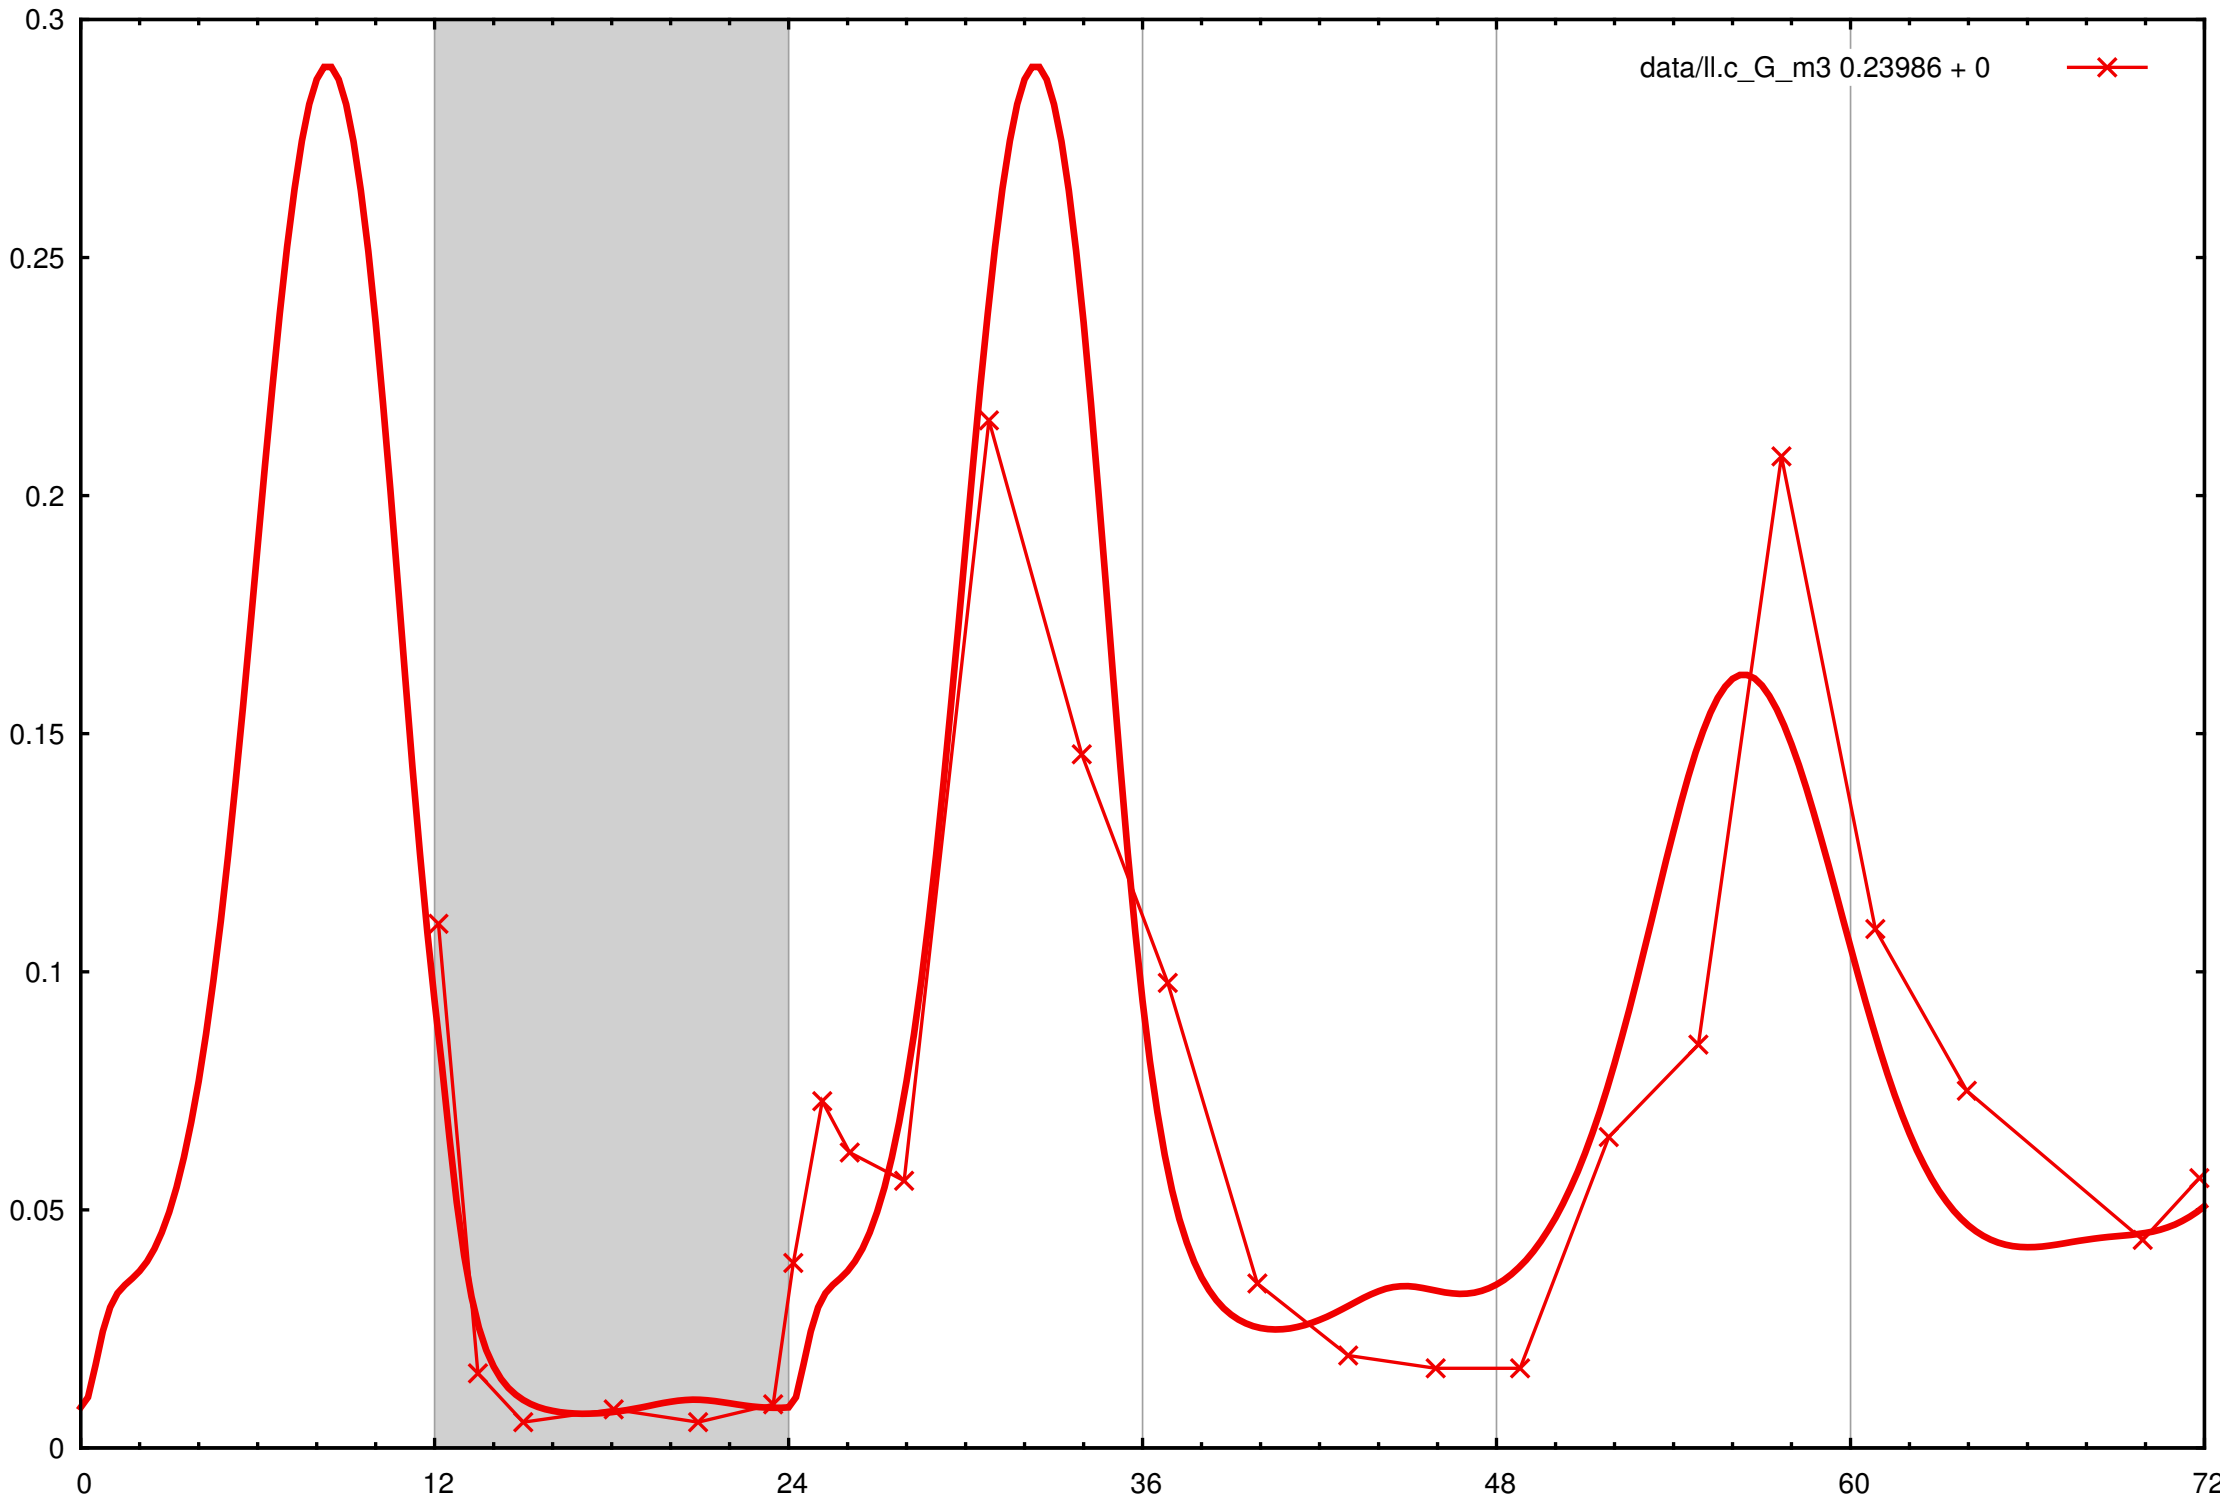

Scale group 325, scost 0

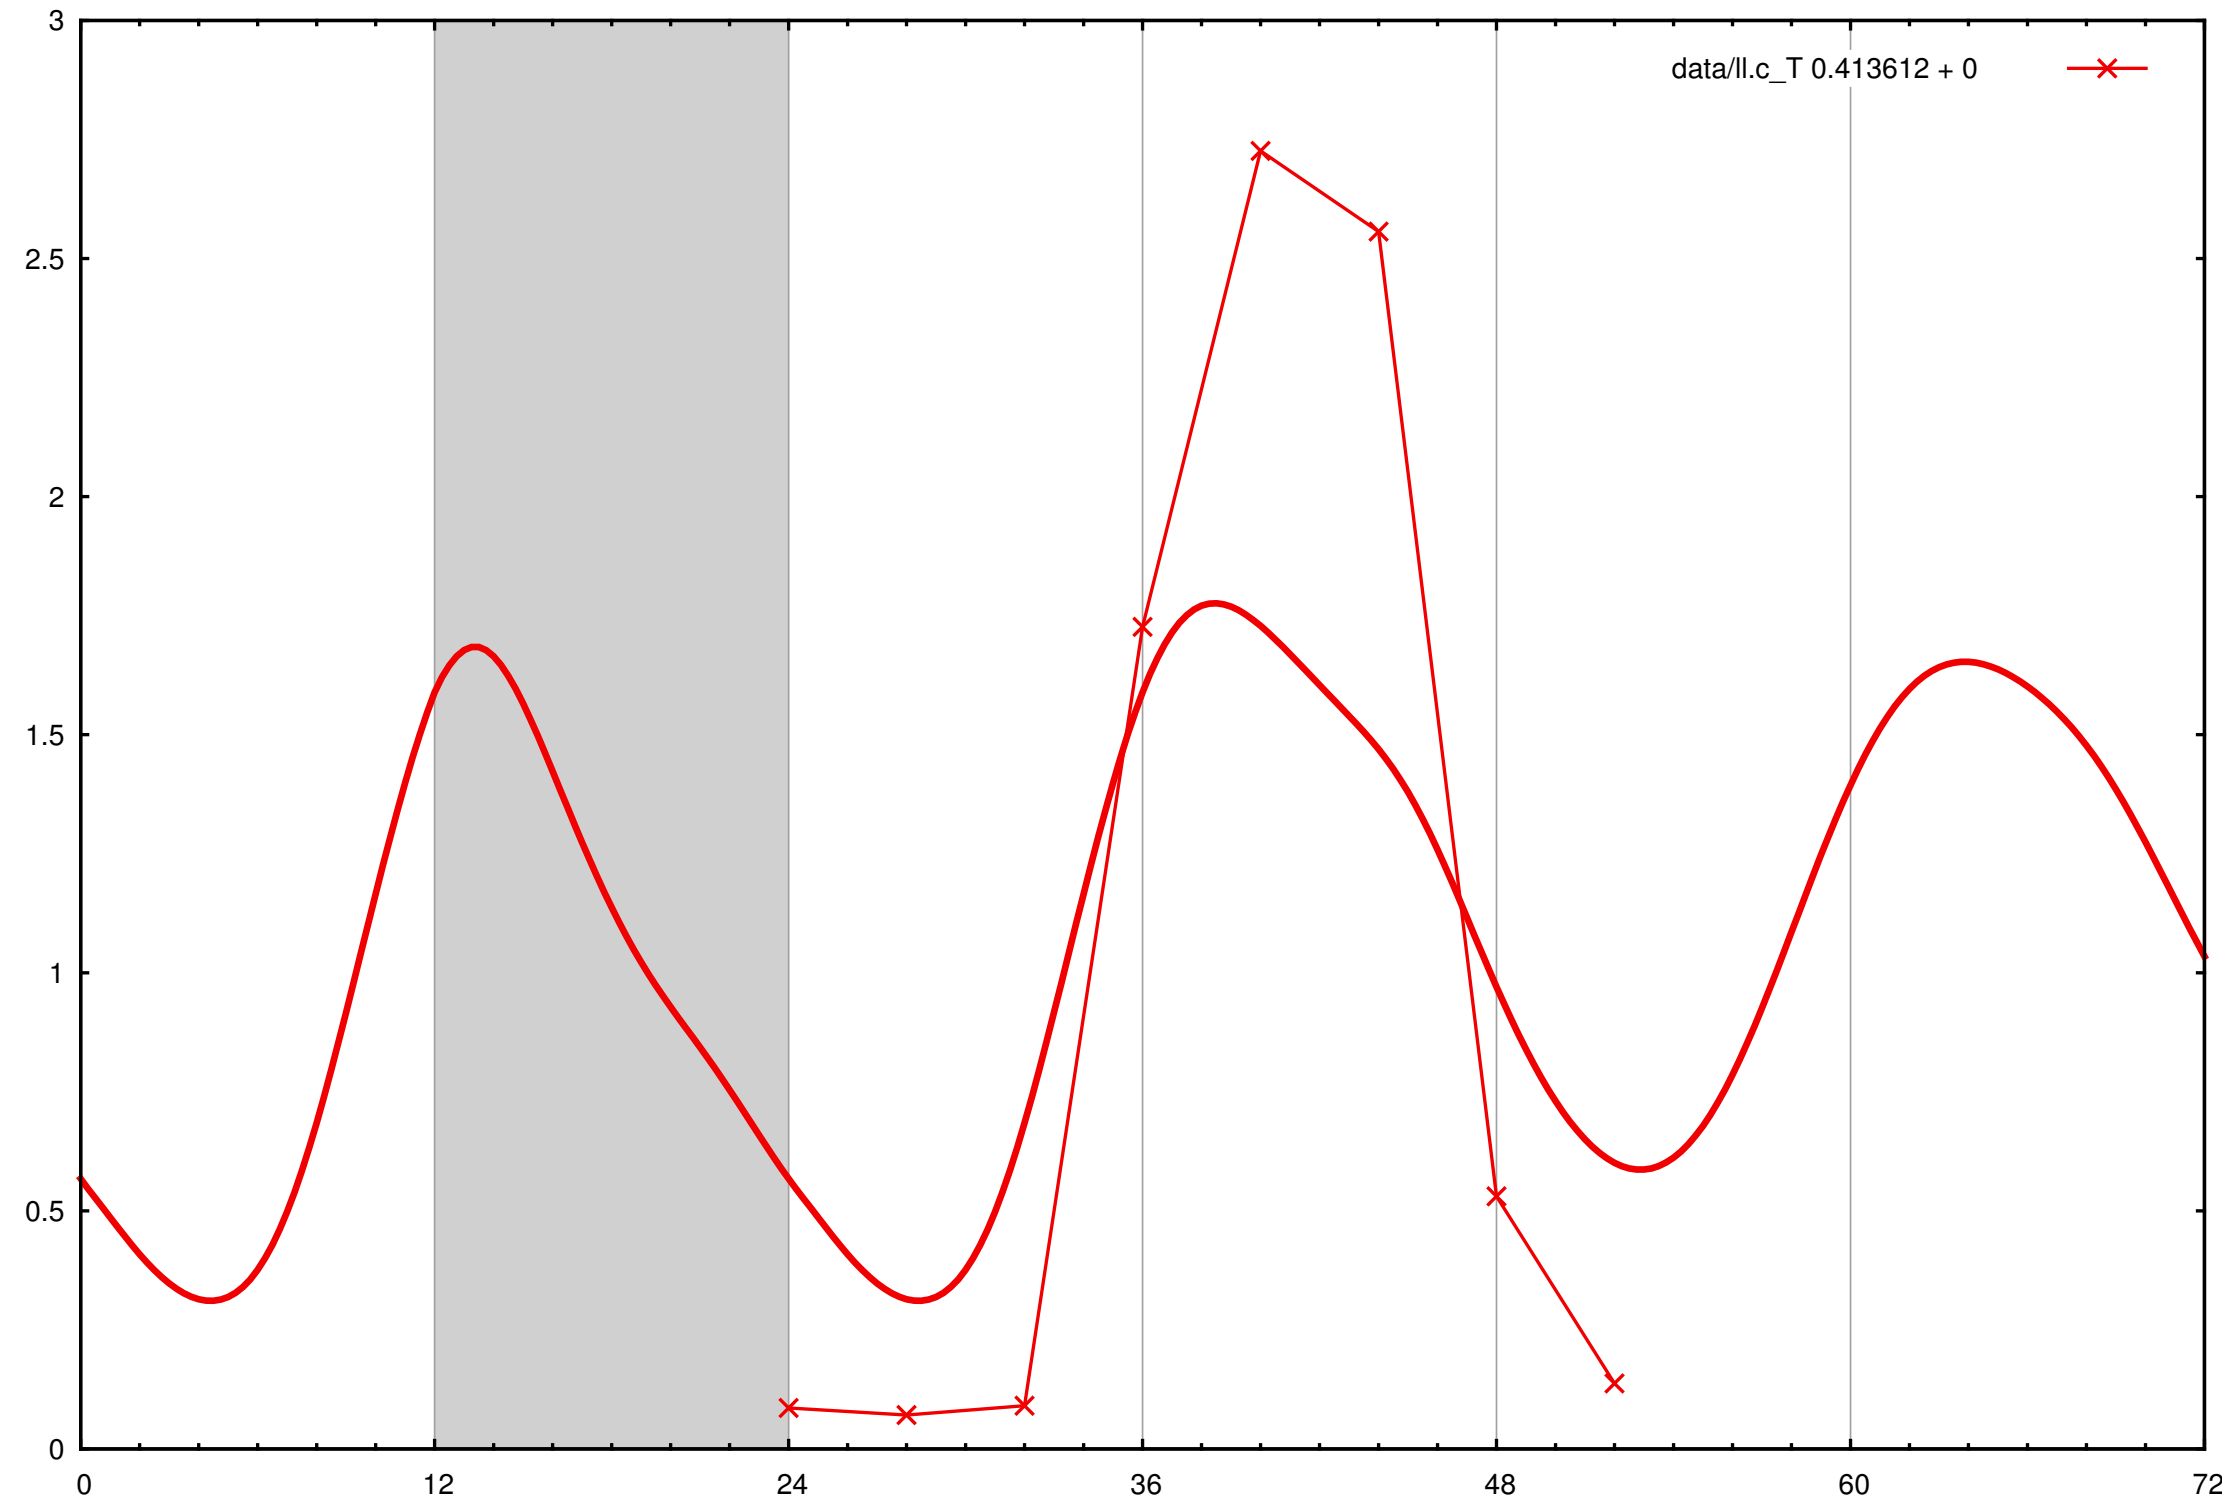

Scale group 326, scost 0

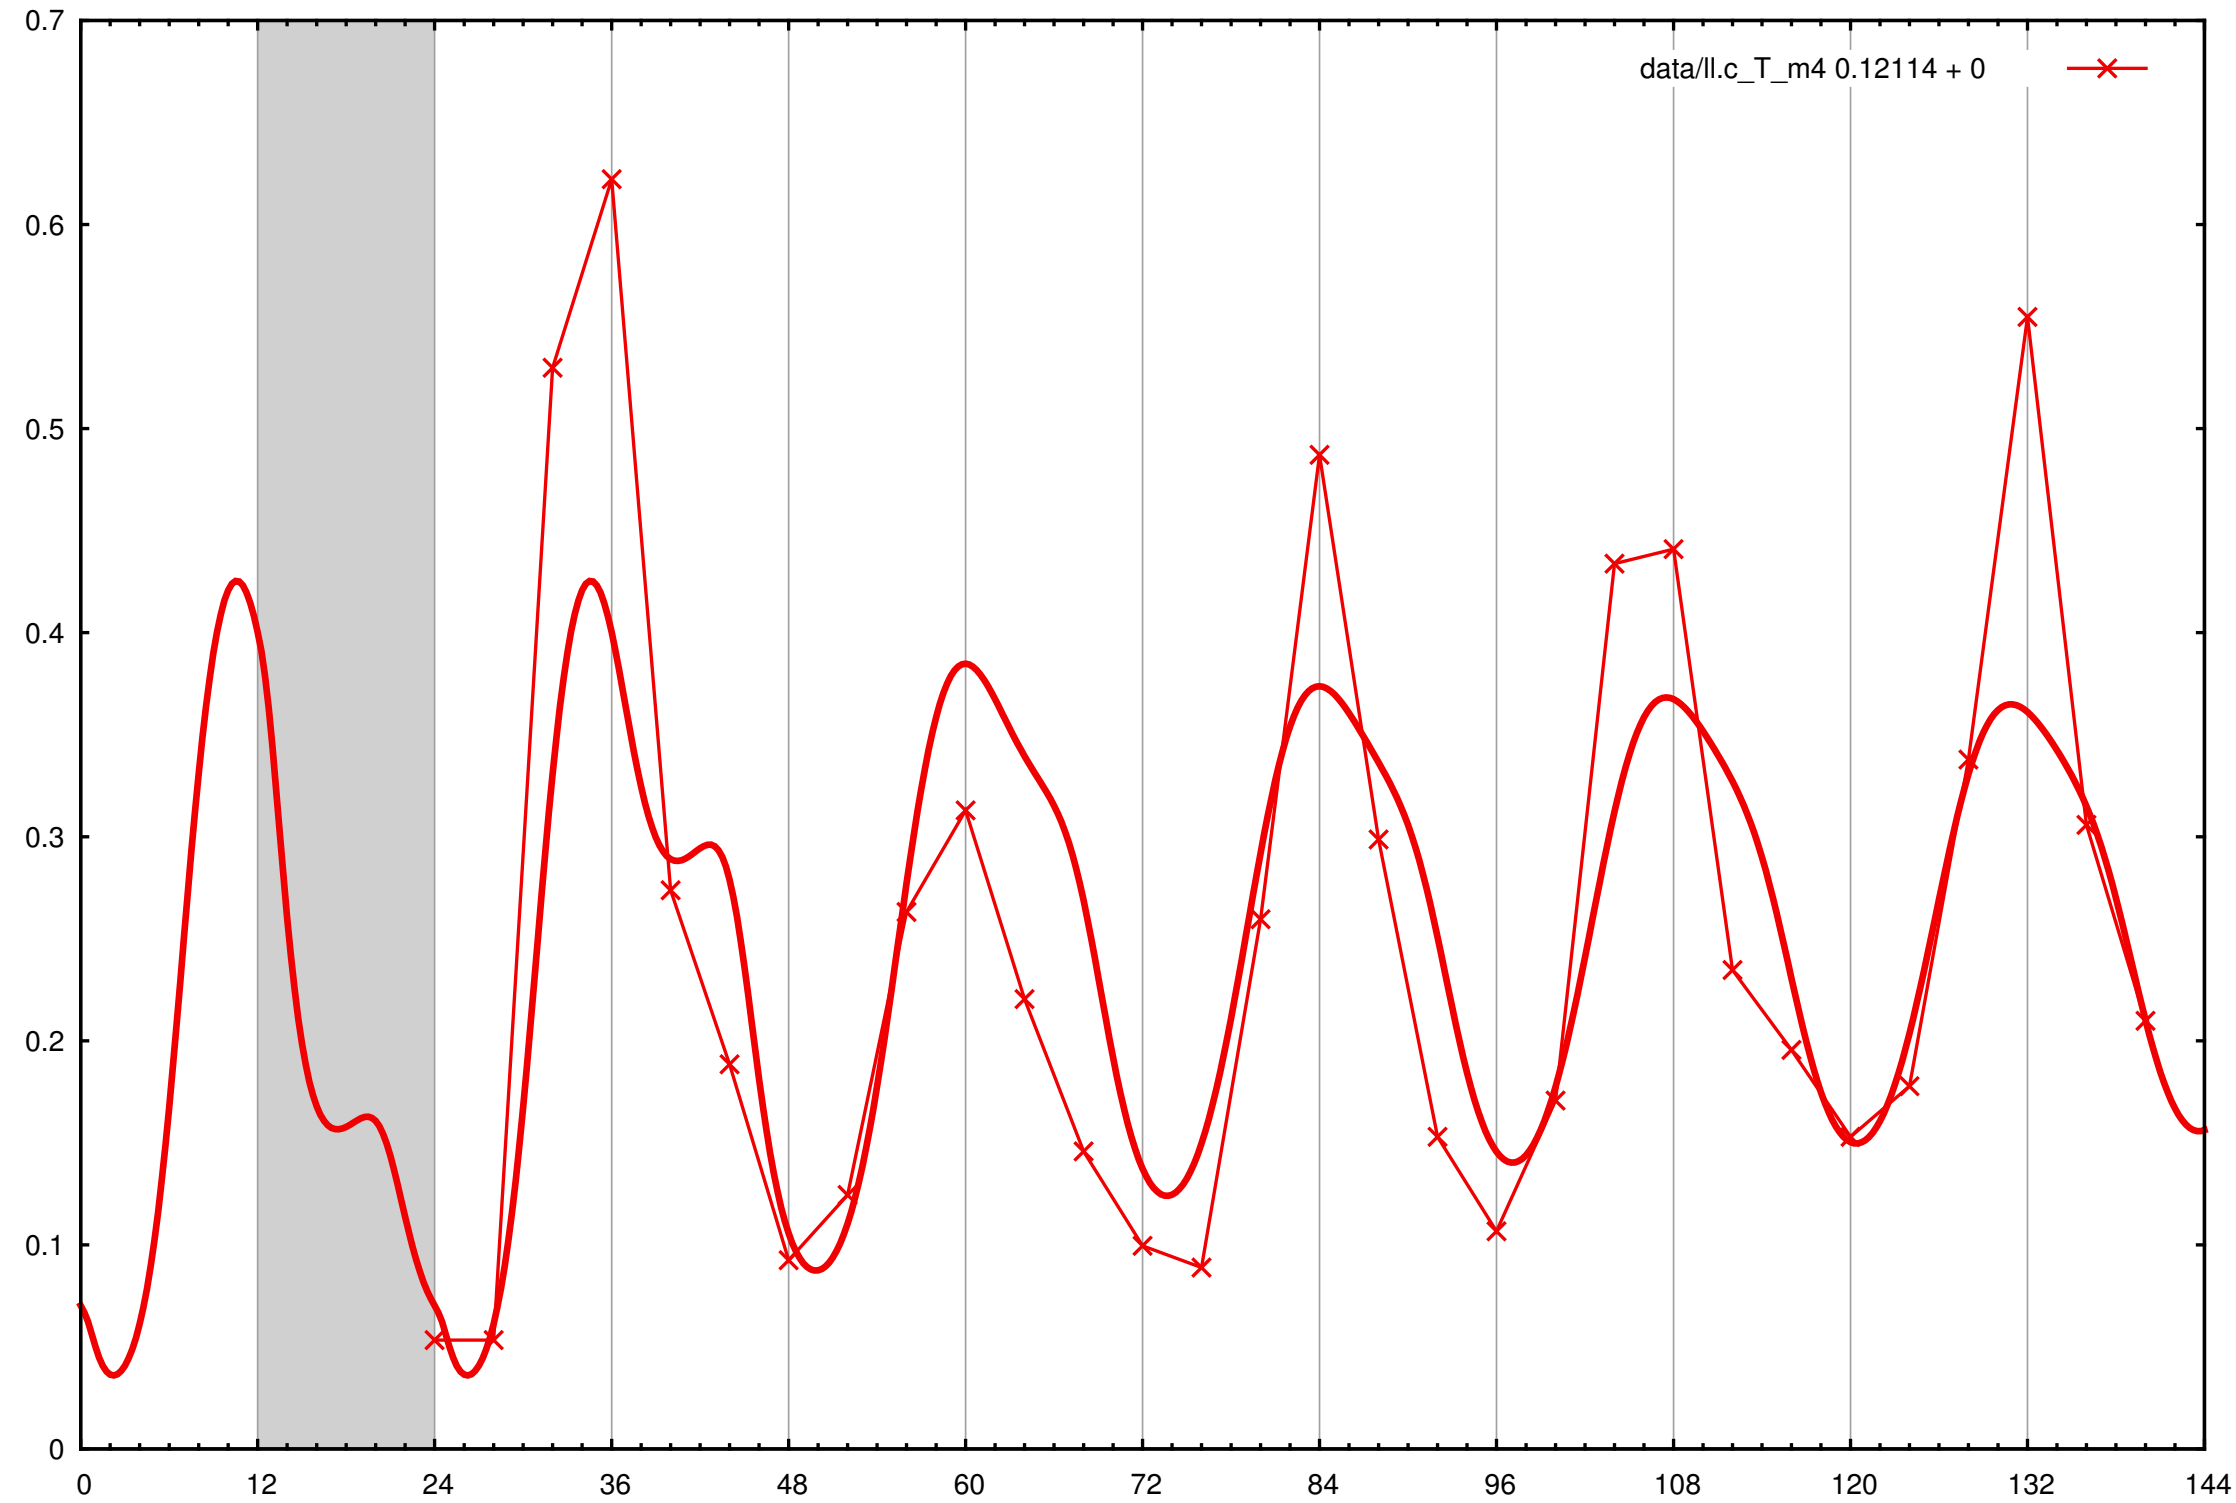

Scale group 327, scost 0

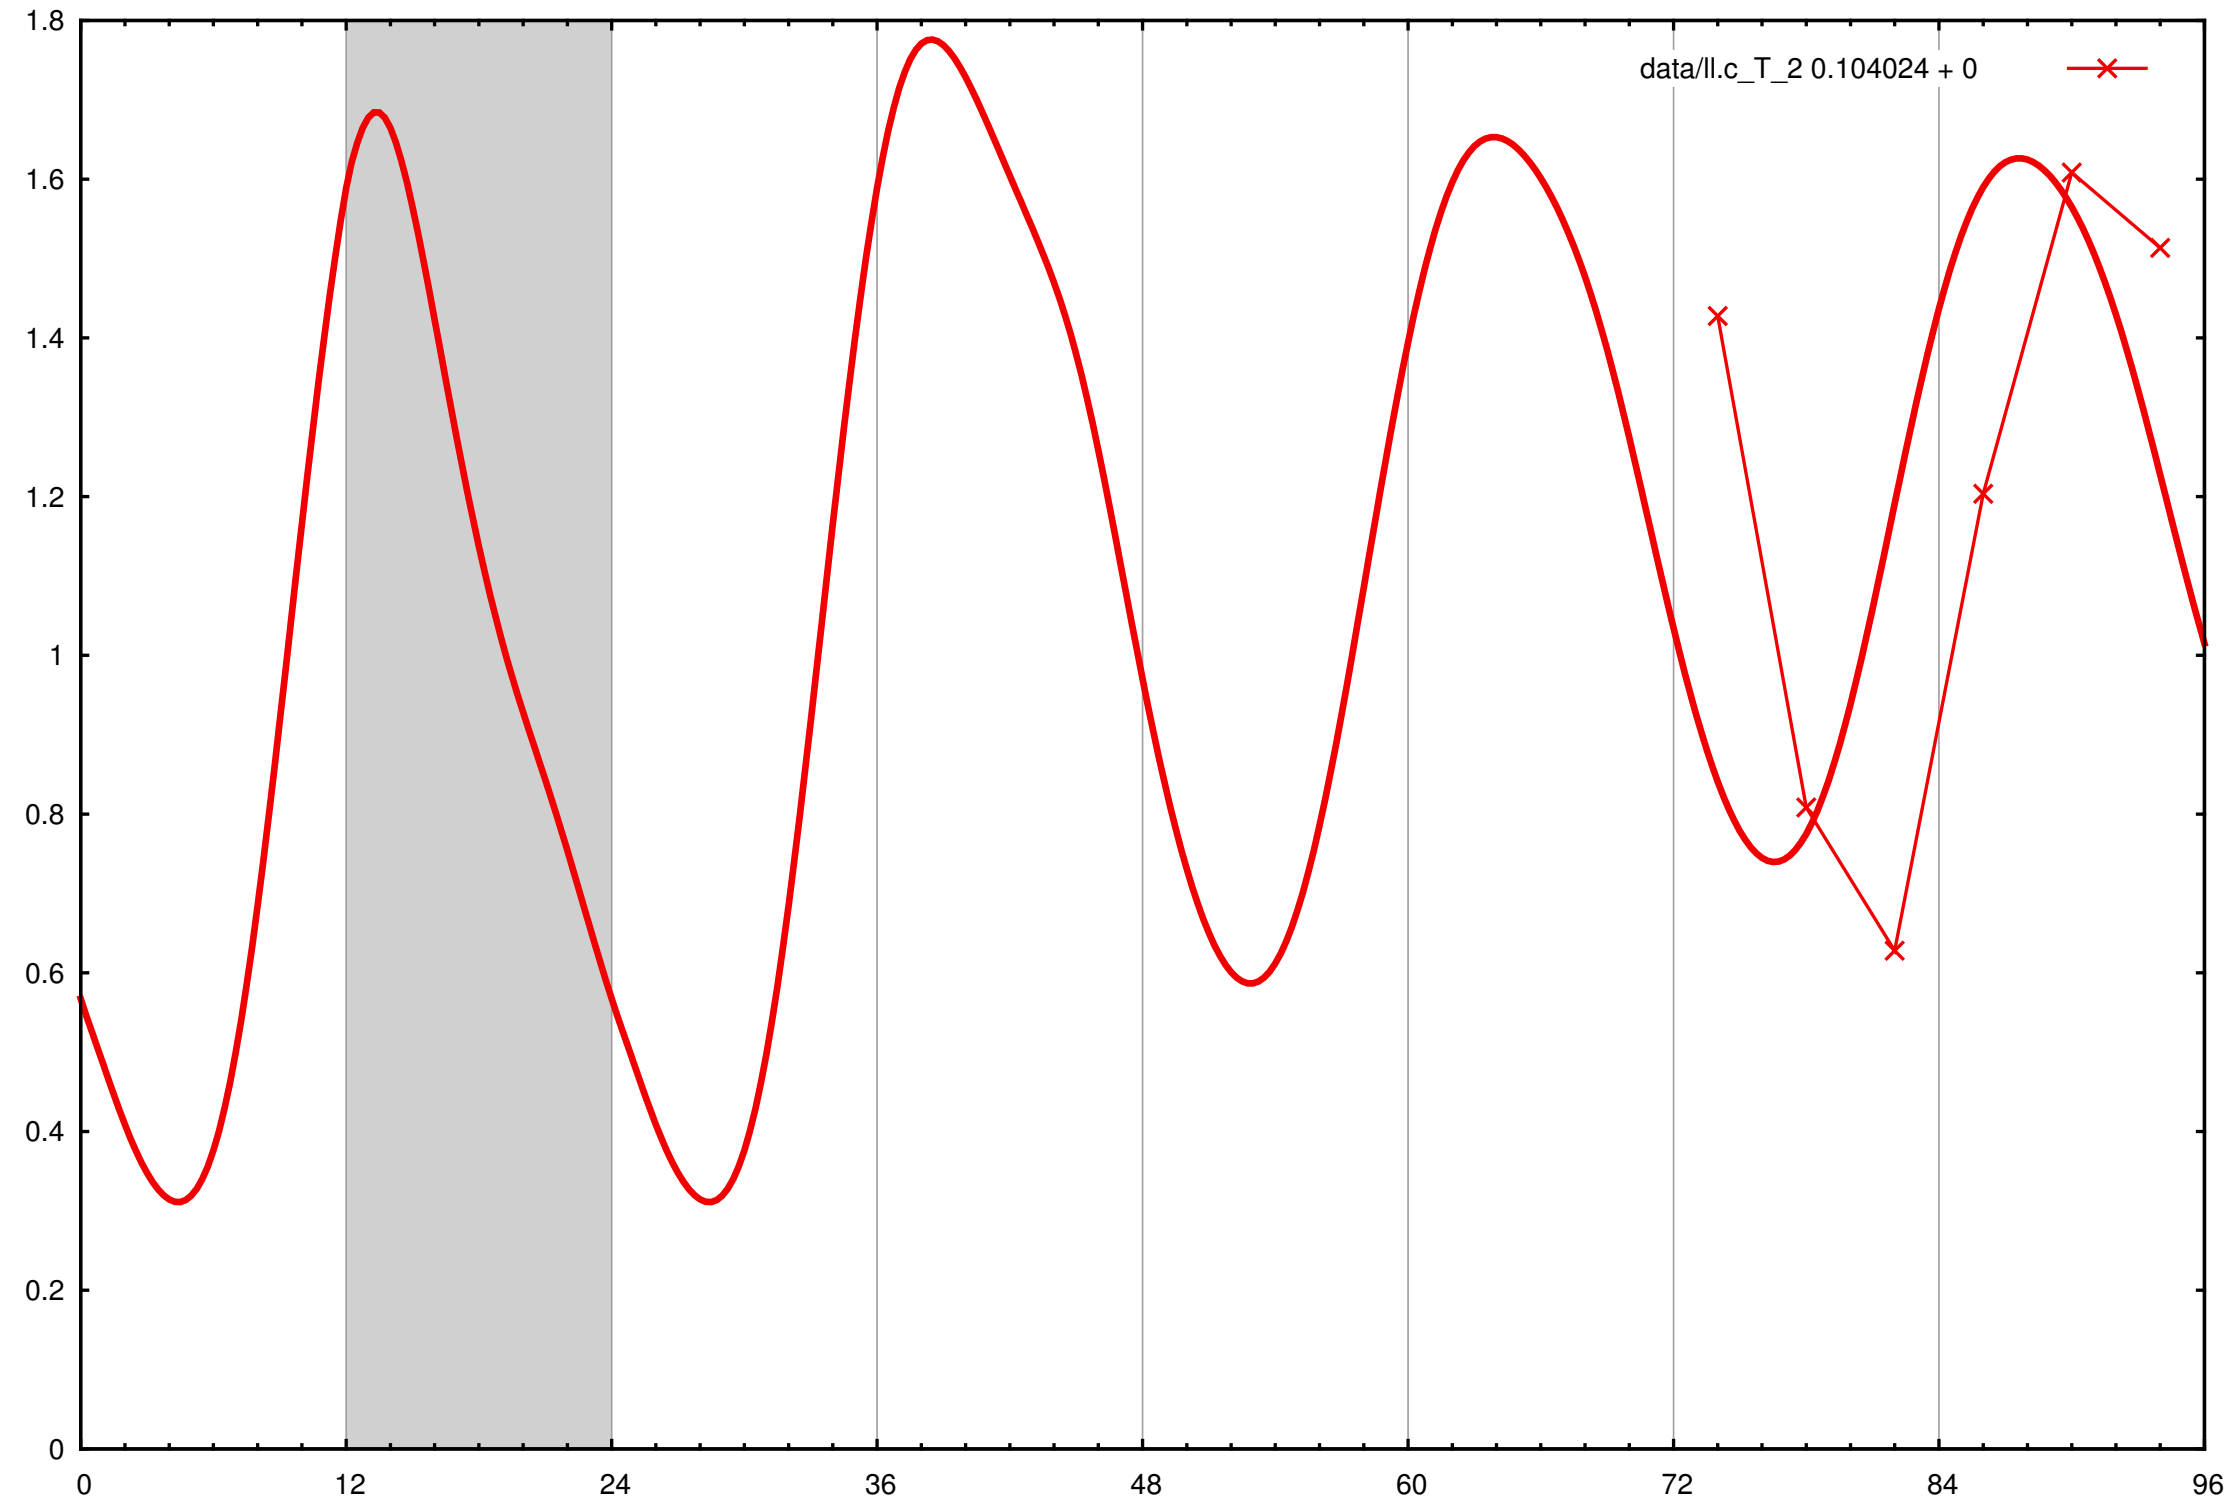

Scale group 328, scost 0

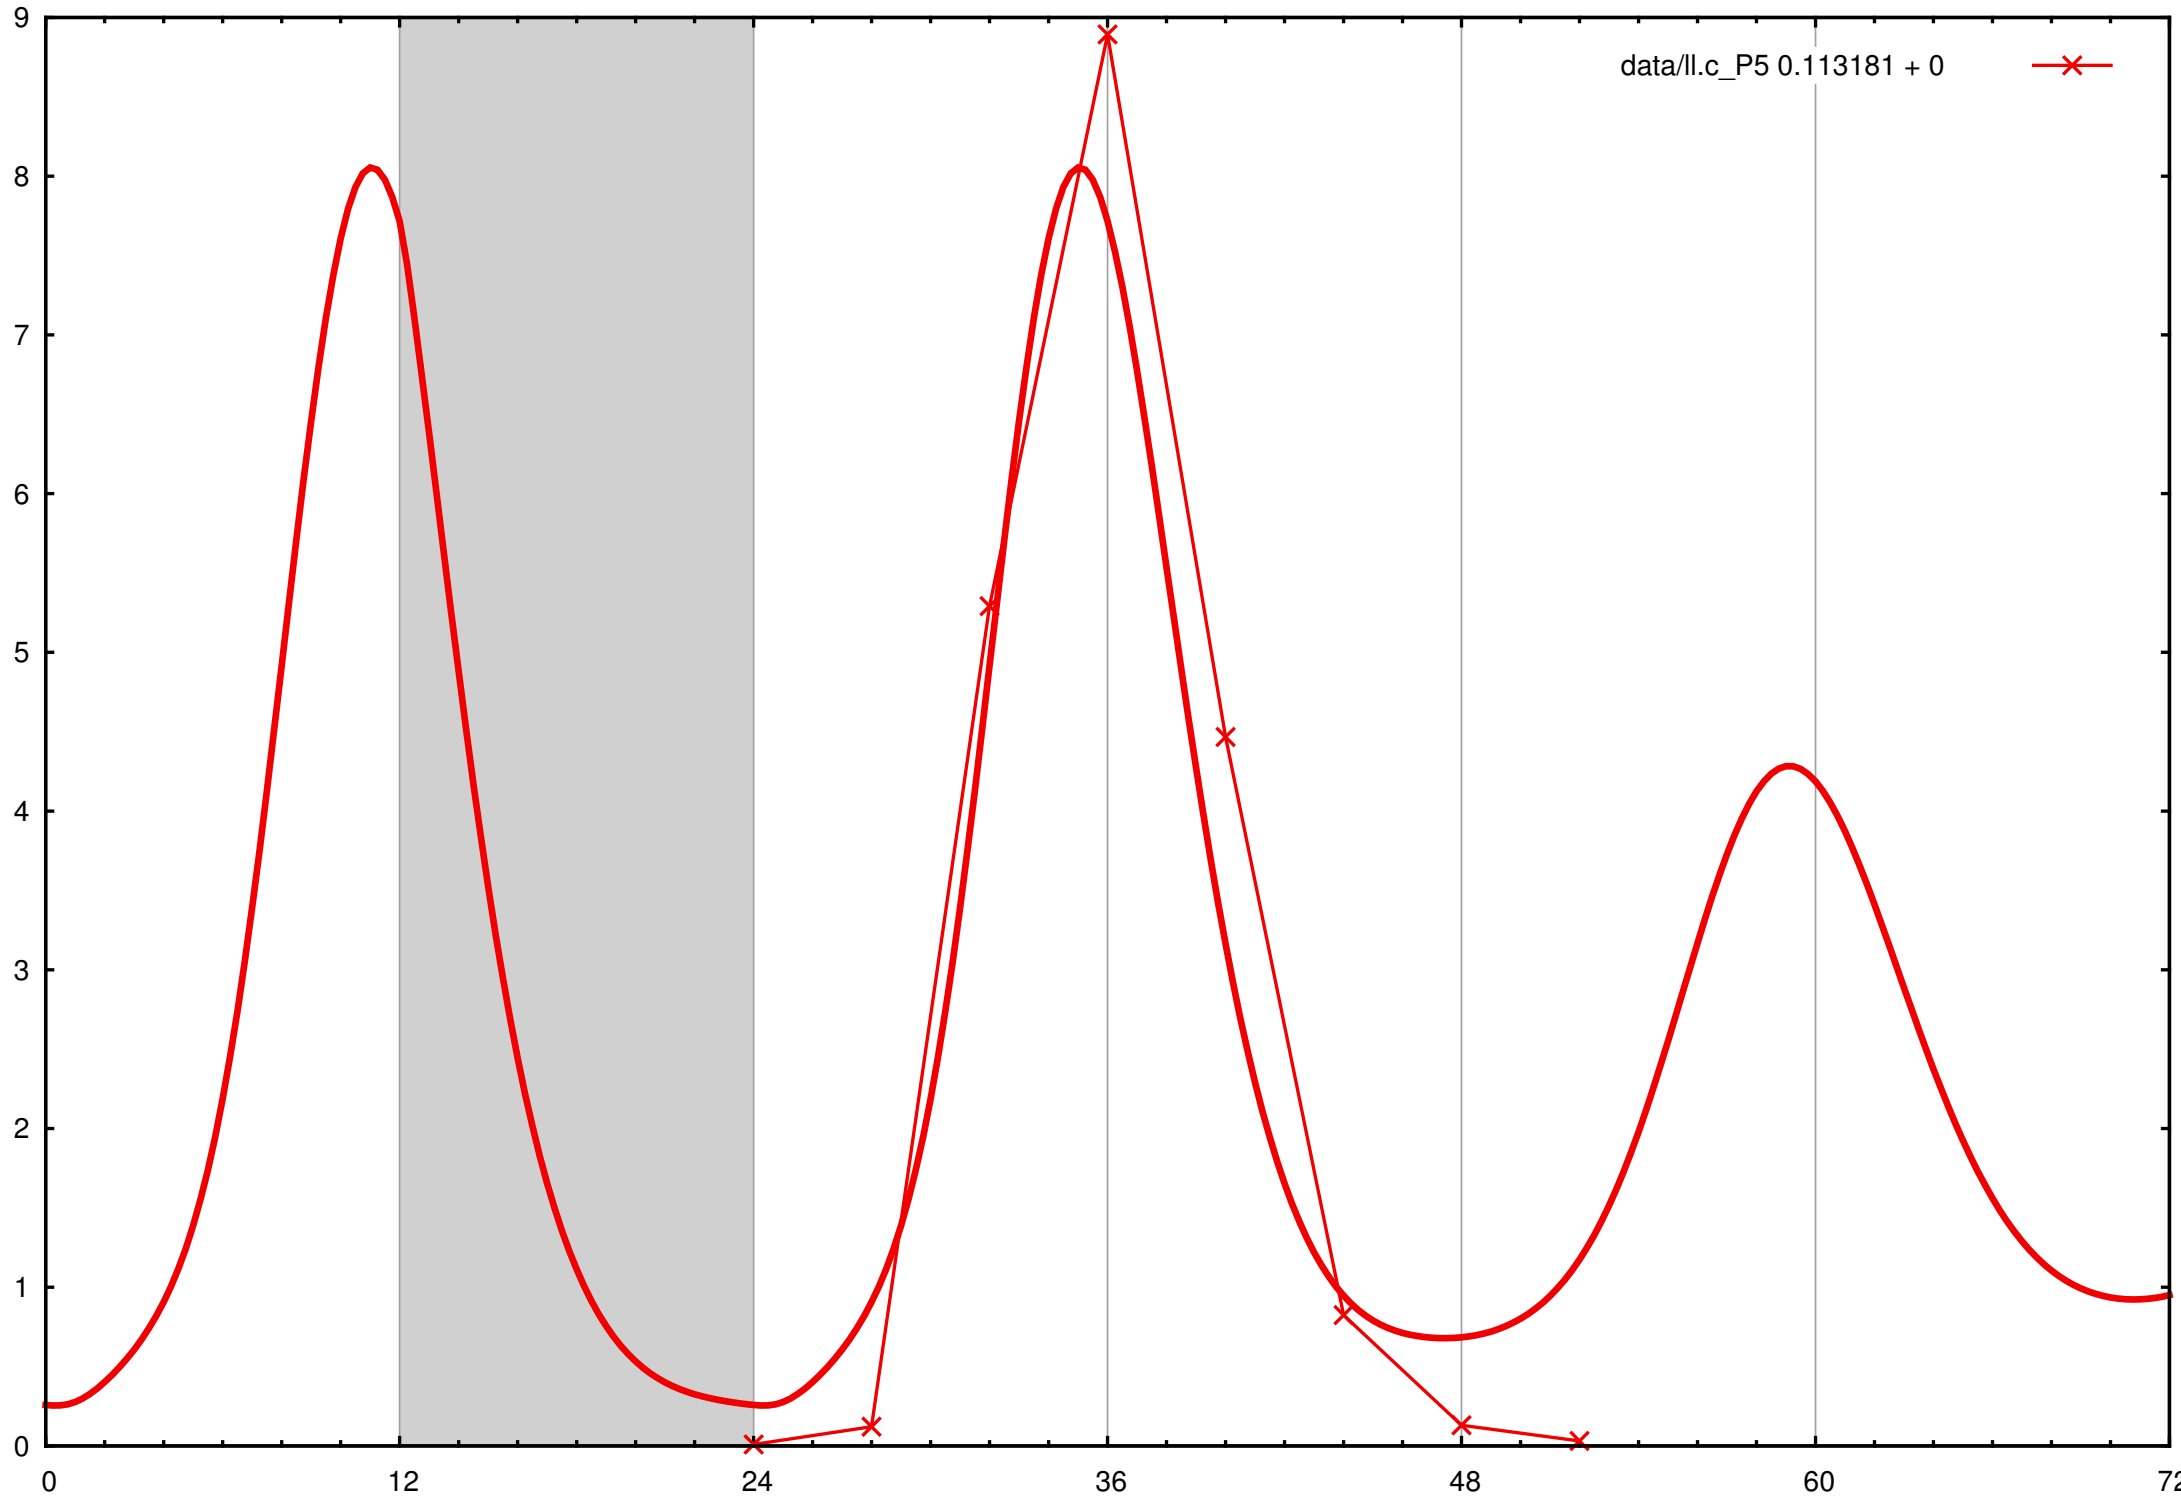



Scale group 329, scost 0

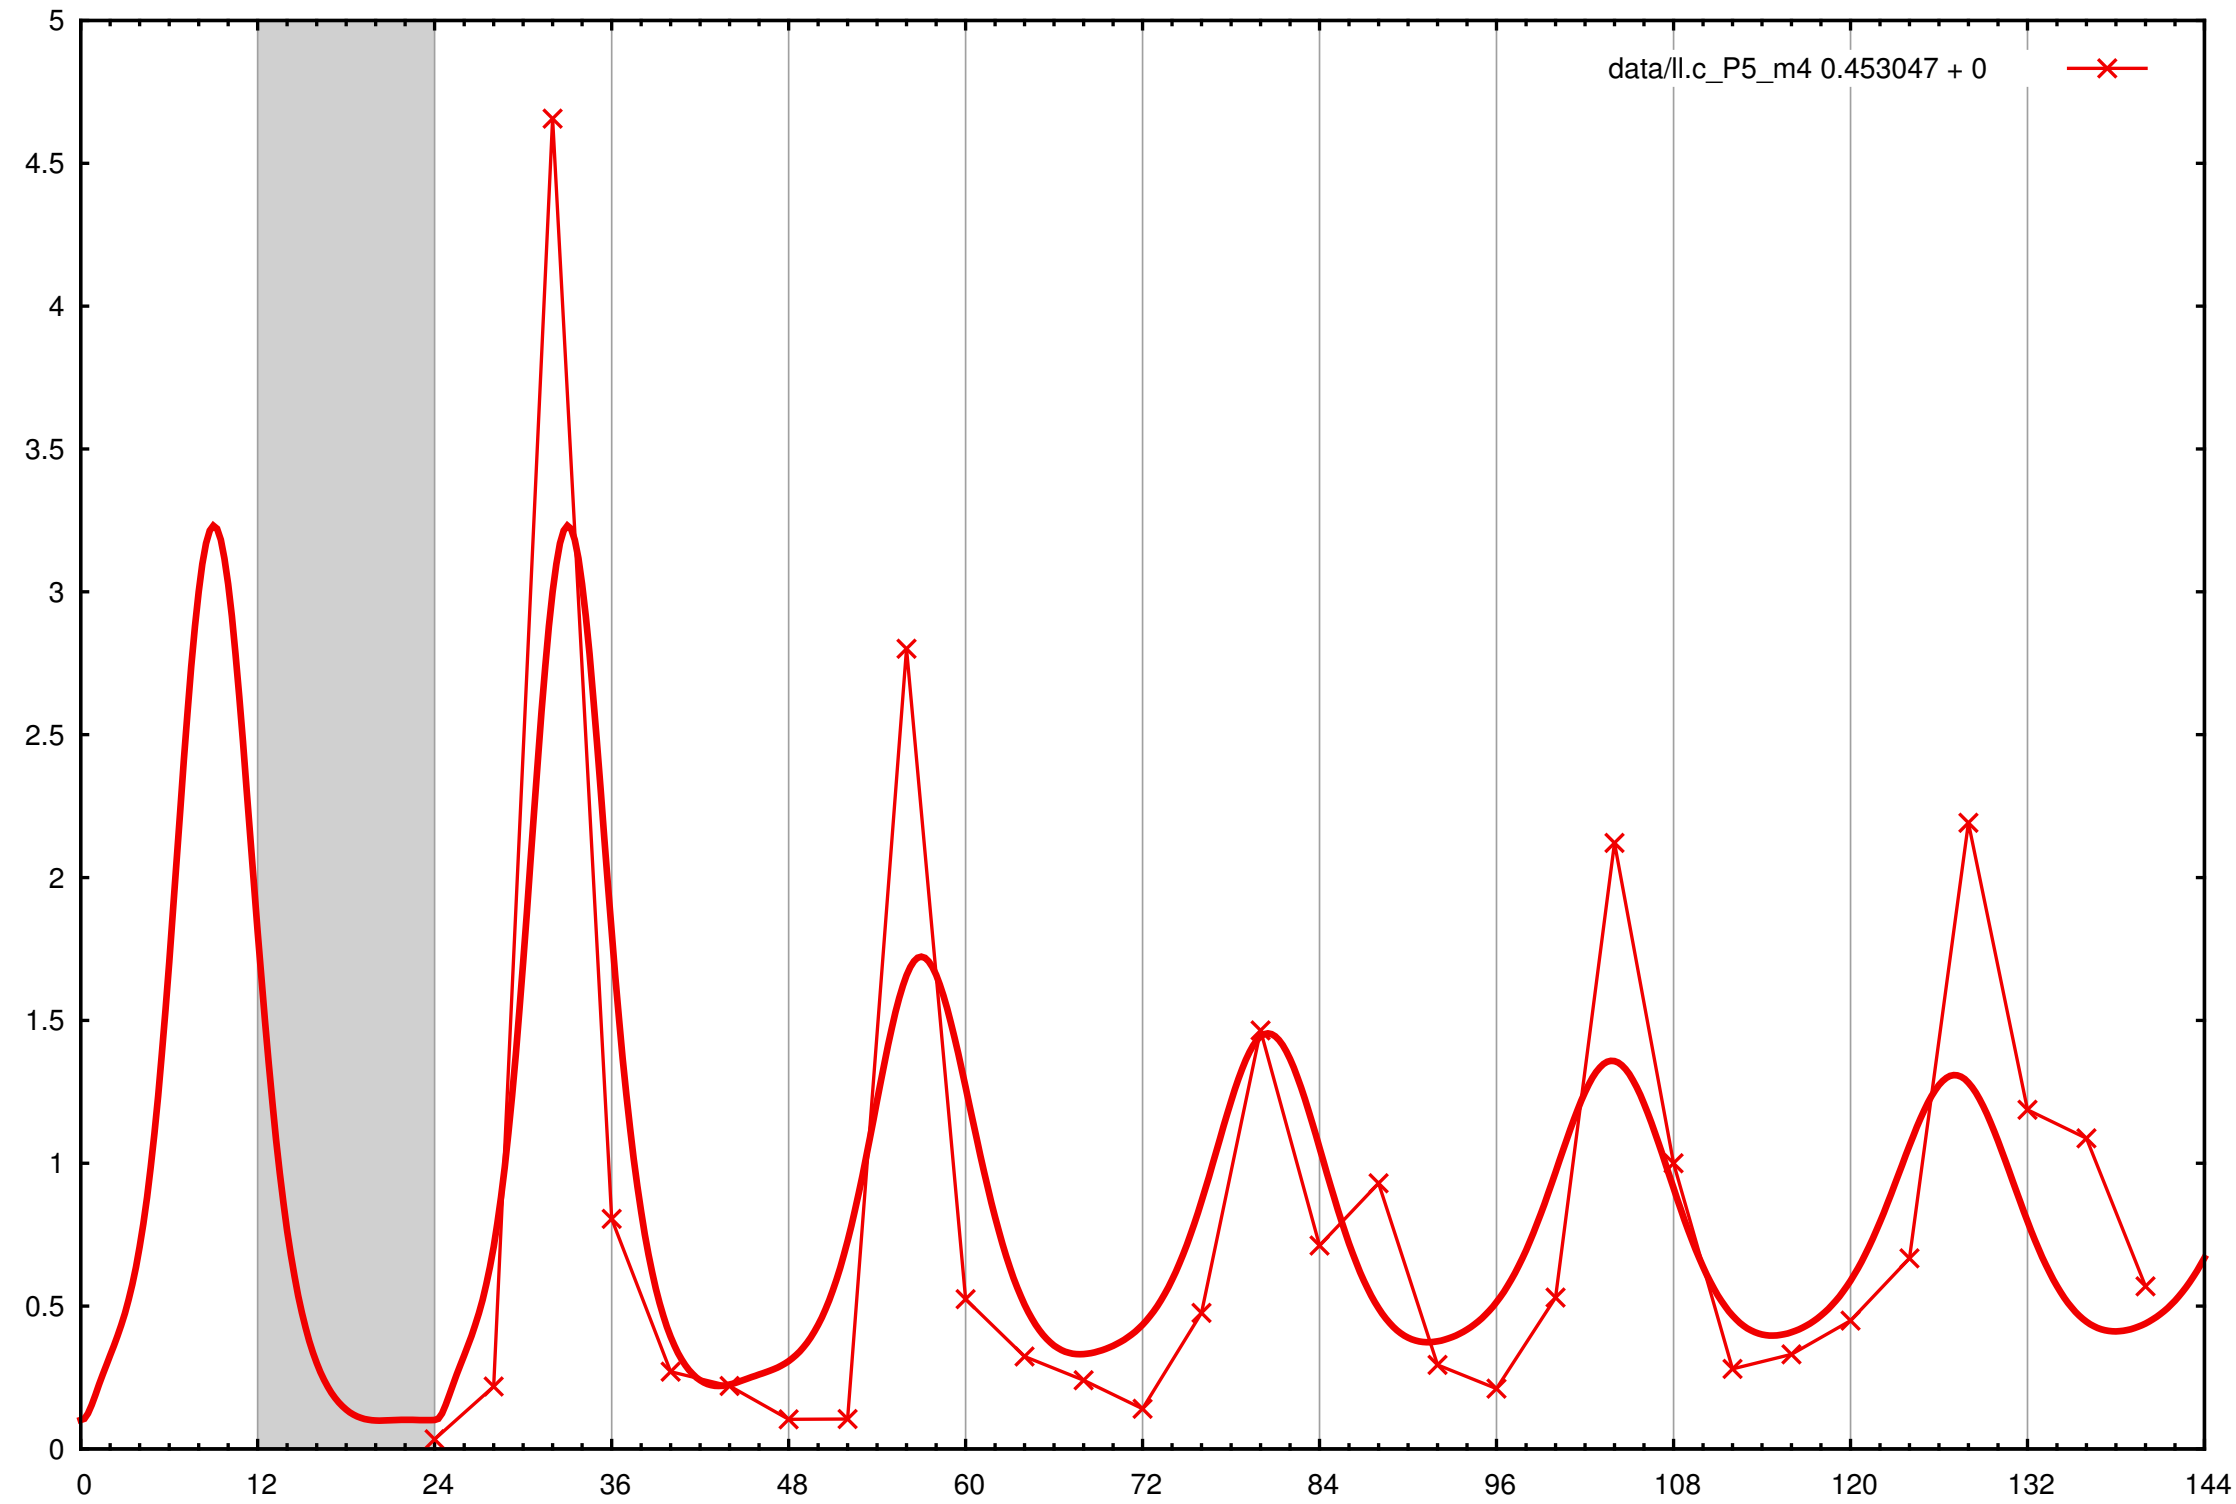

Scale group 330, scost 0

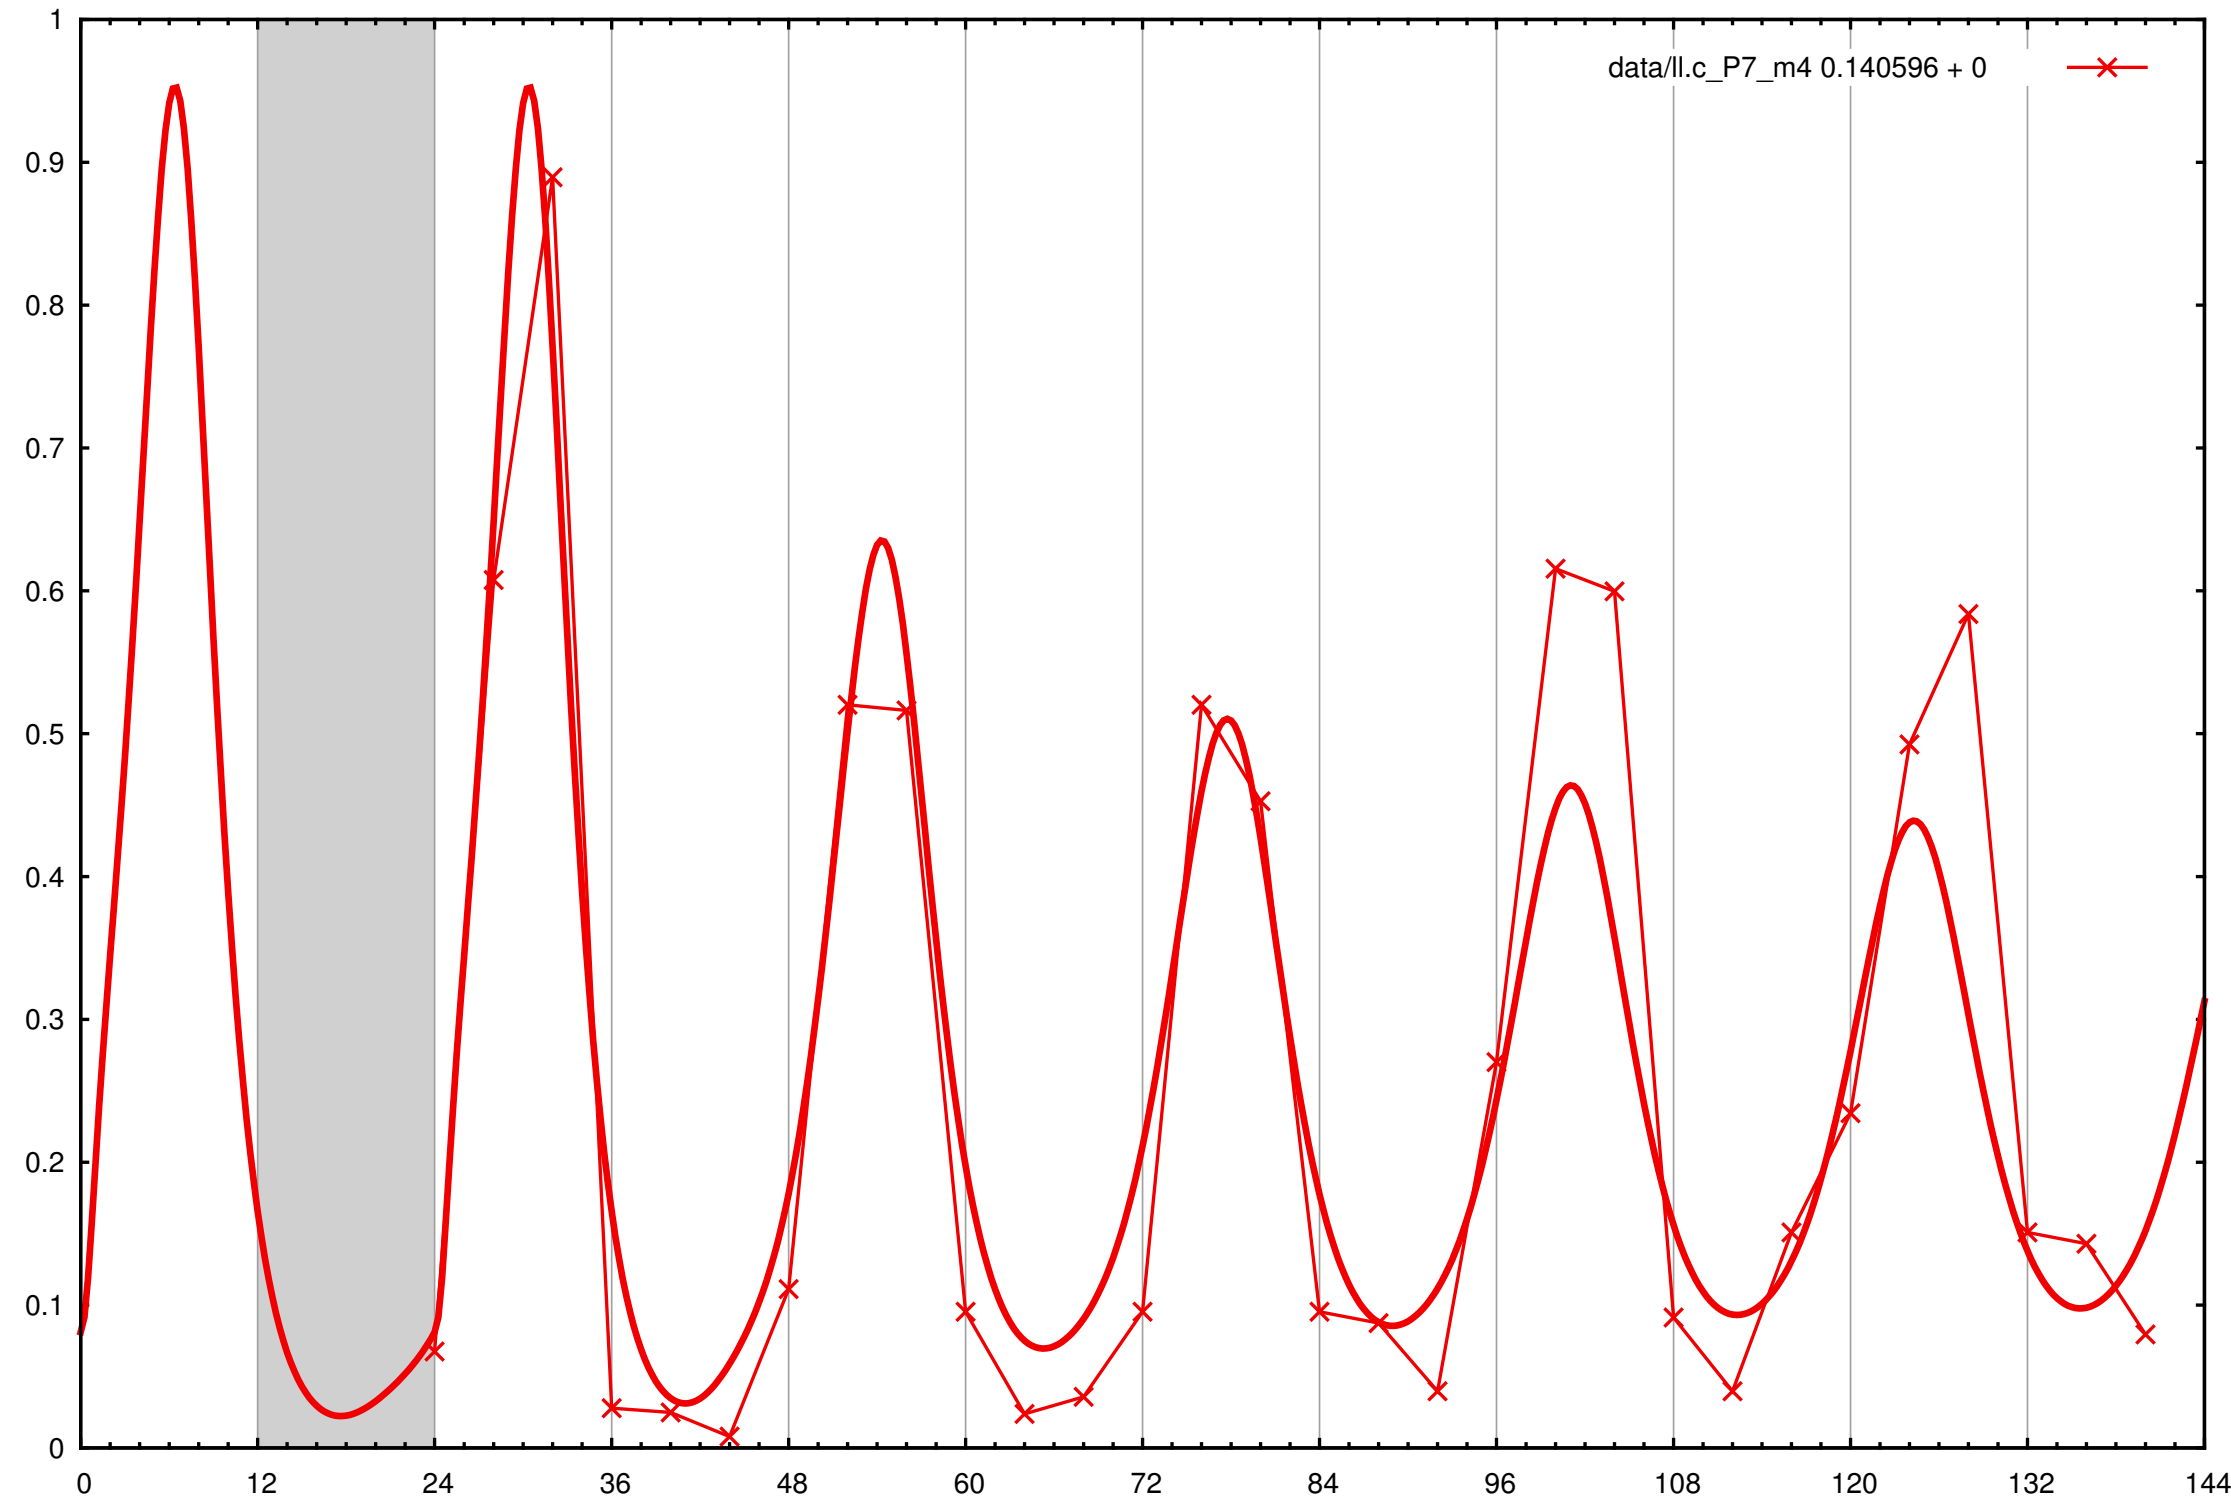

Scale group 331, scost 0

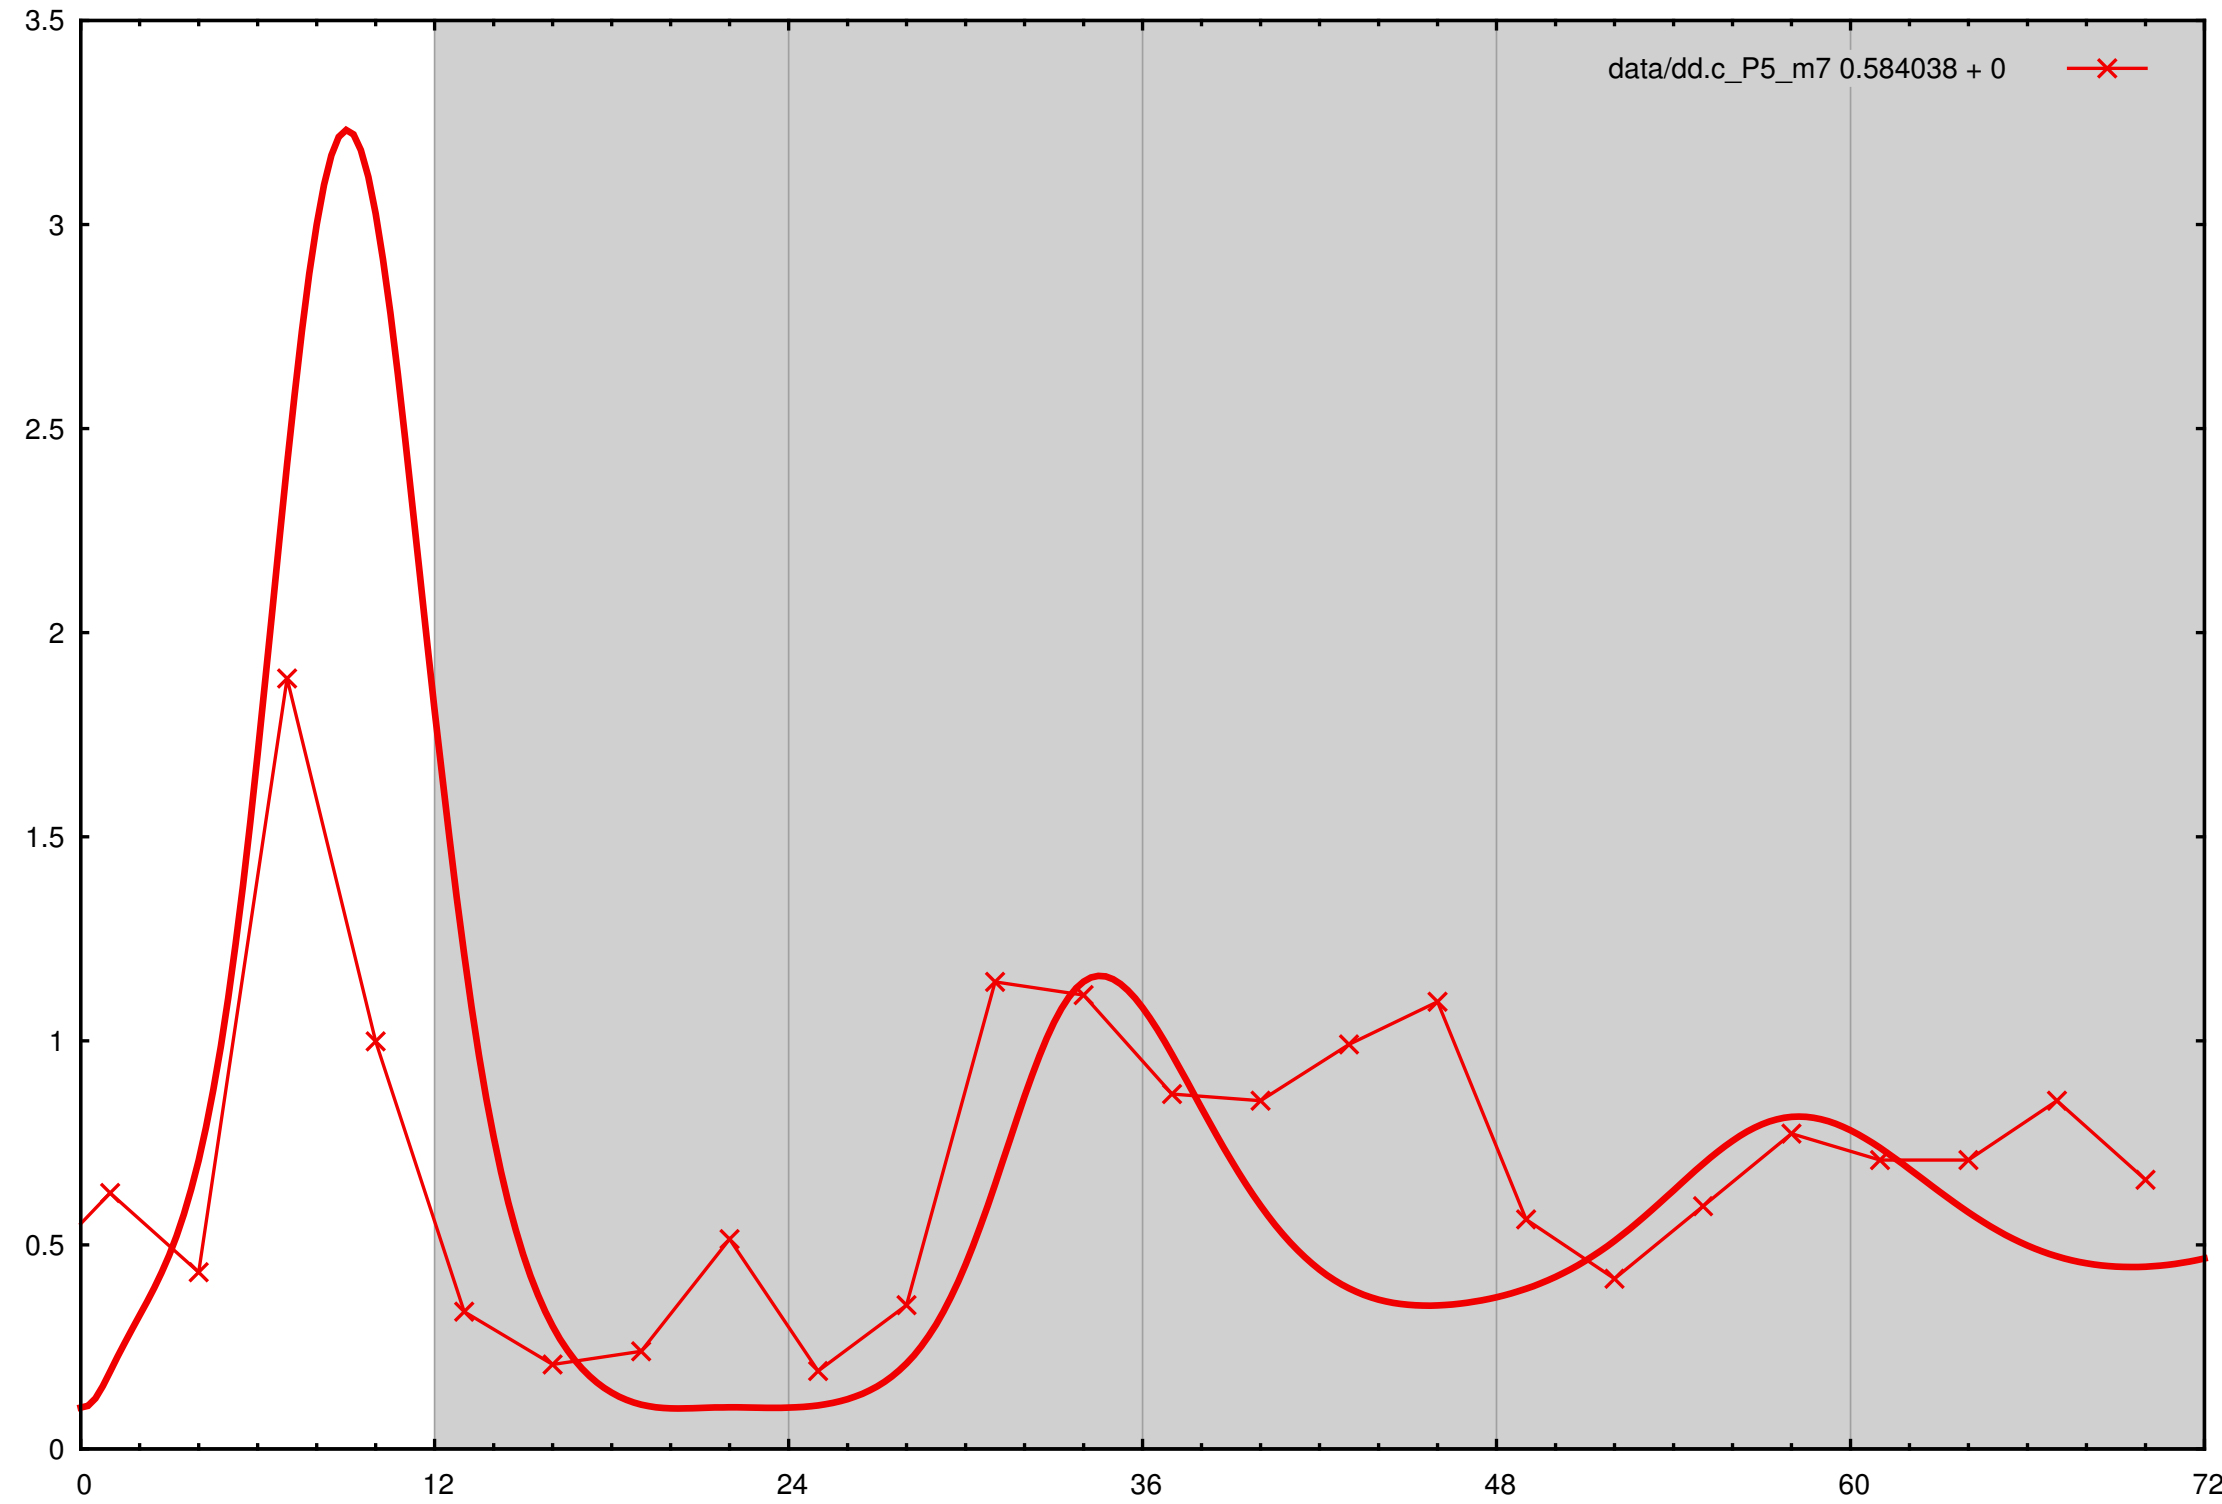

Scale group 332, scost 0

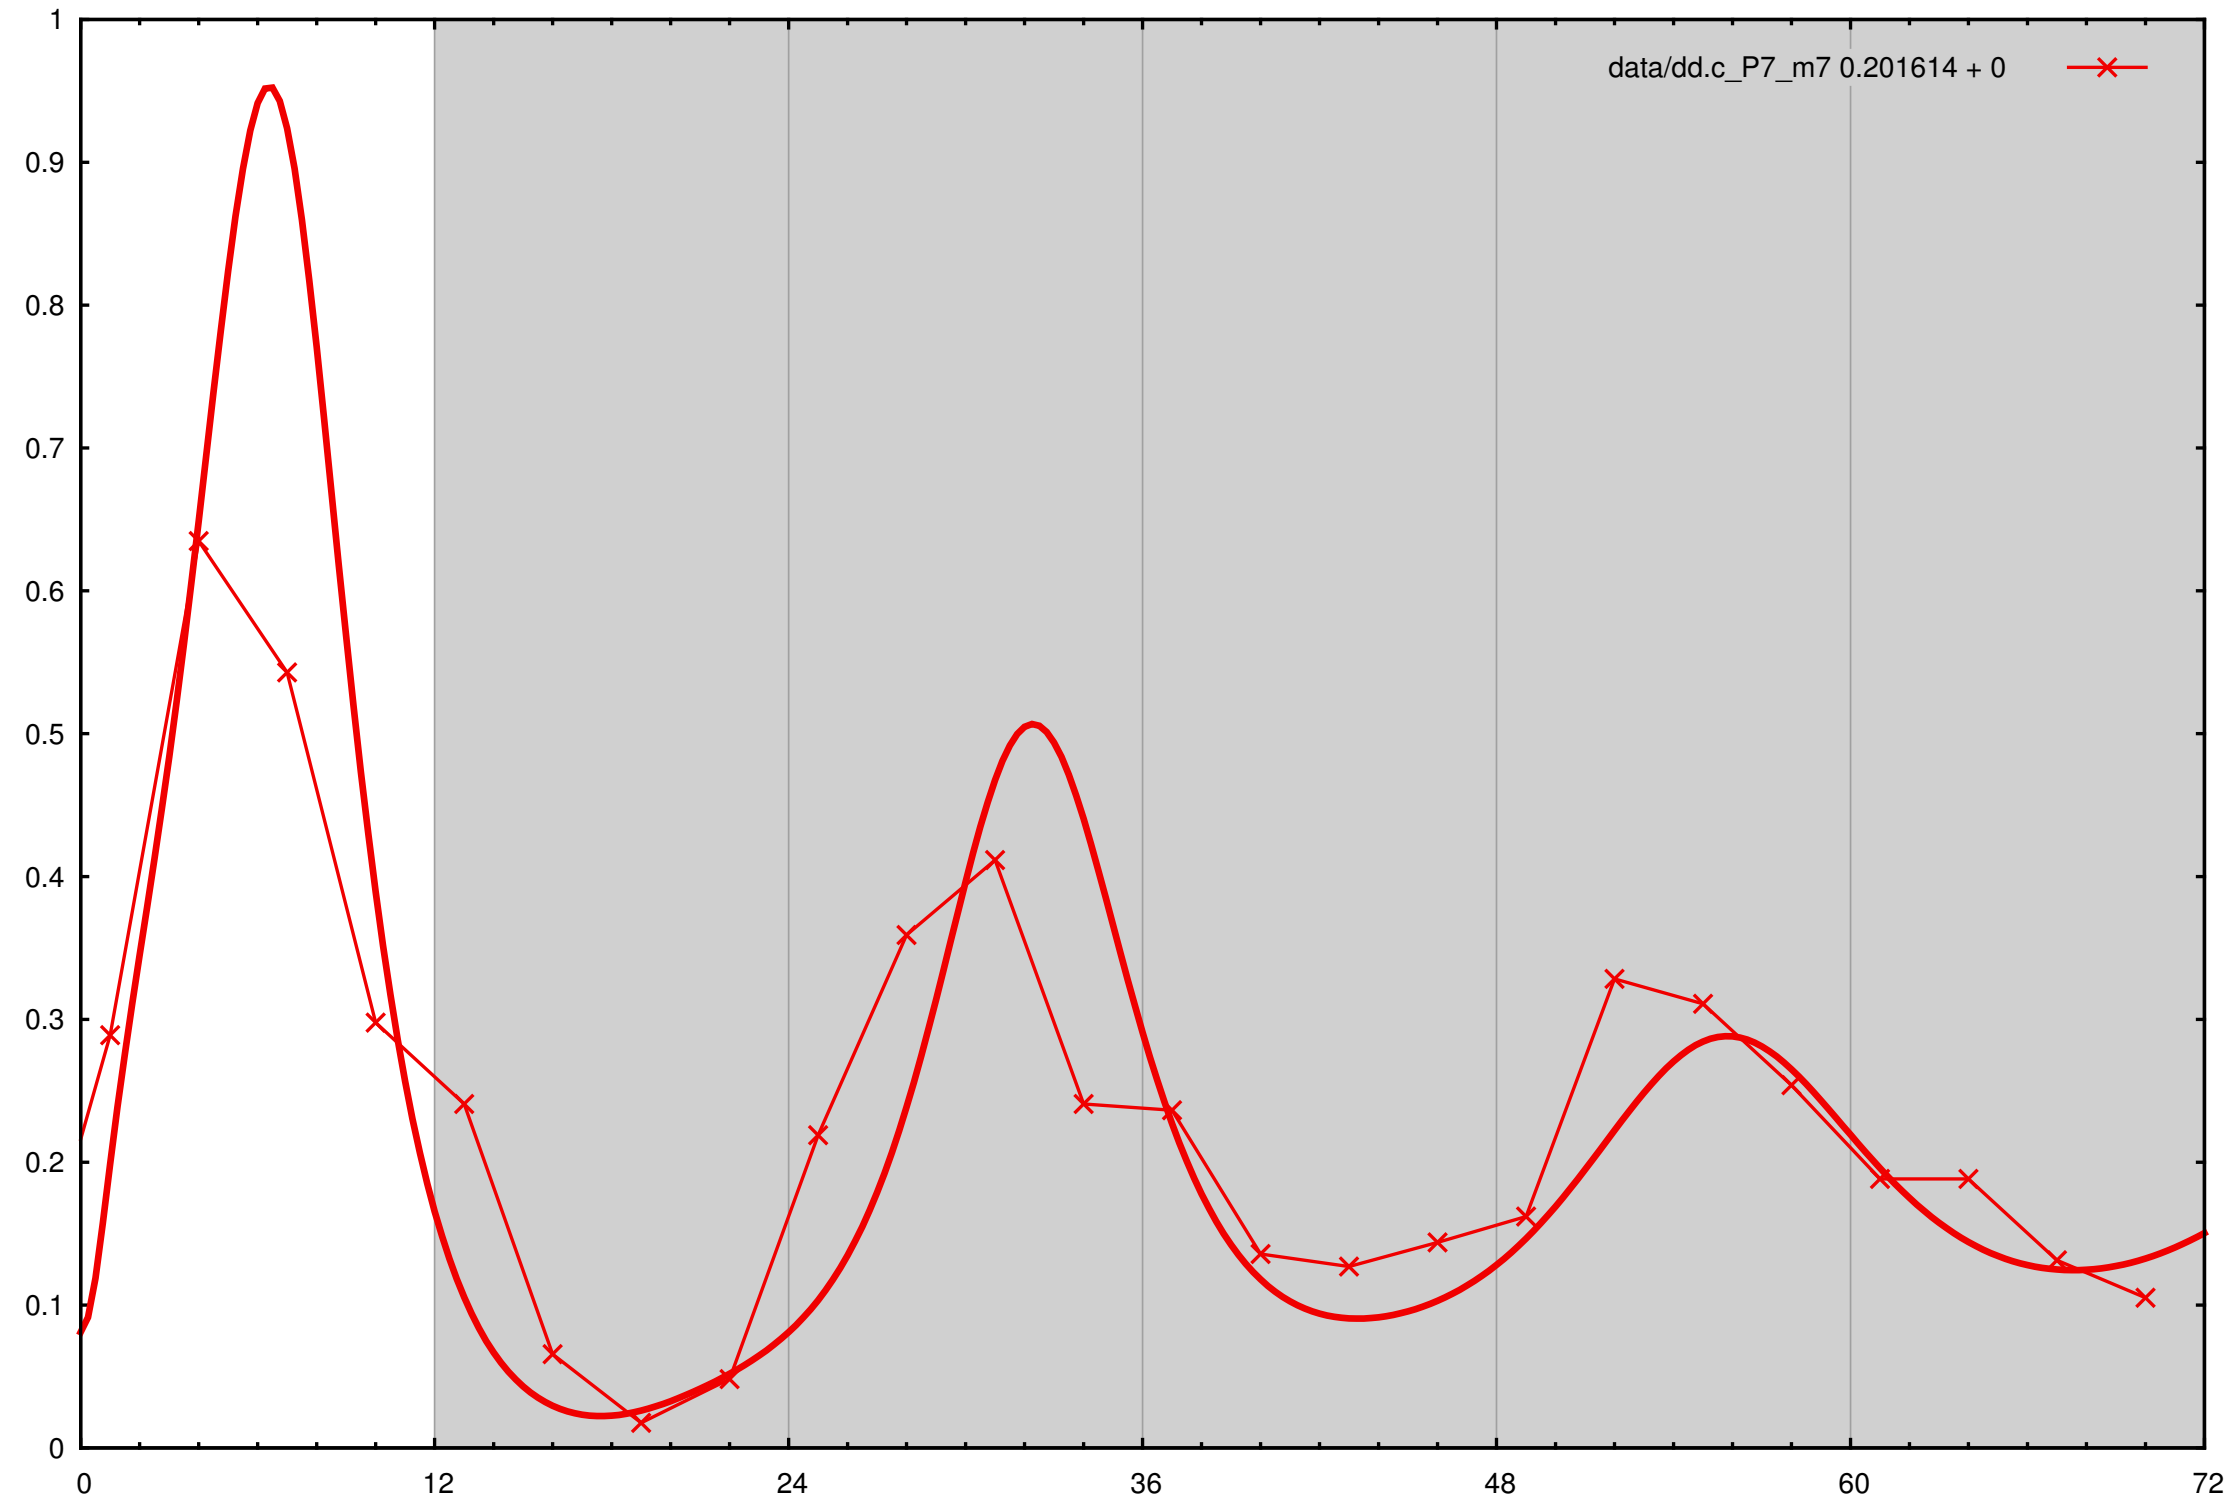

data/dd.c\_P7\_m7 0.201614 + 0

x

Scale group 333, scost 0

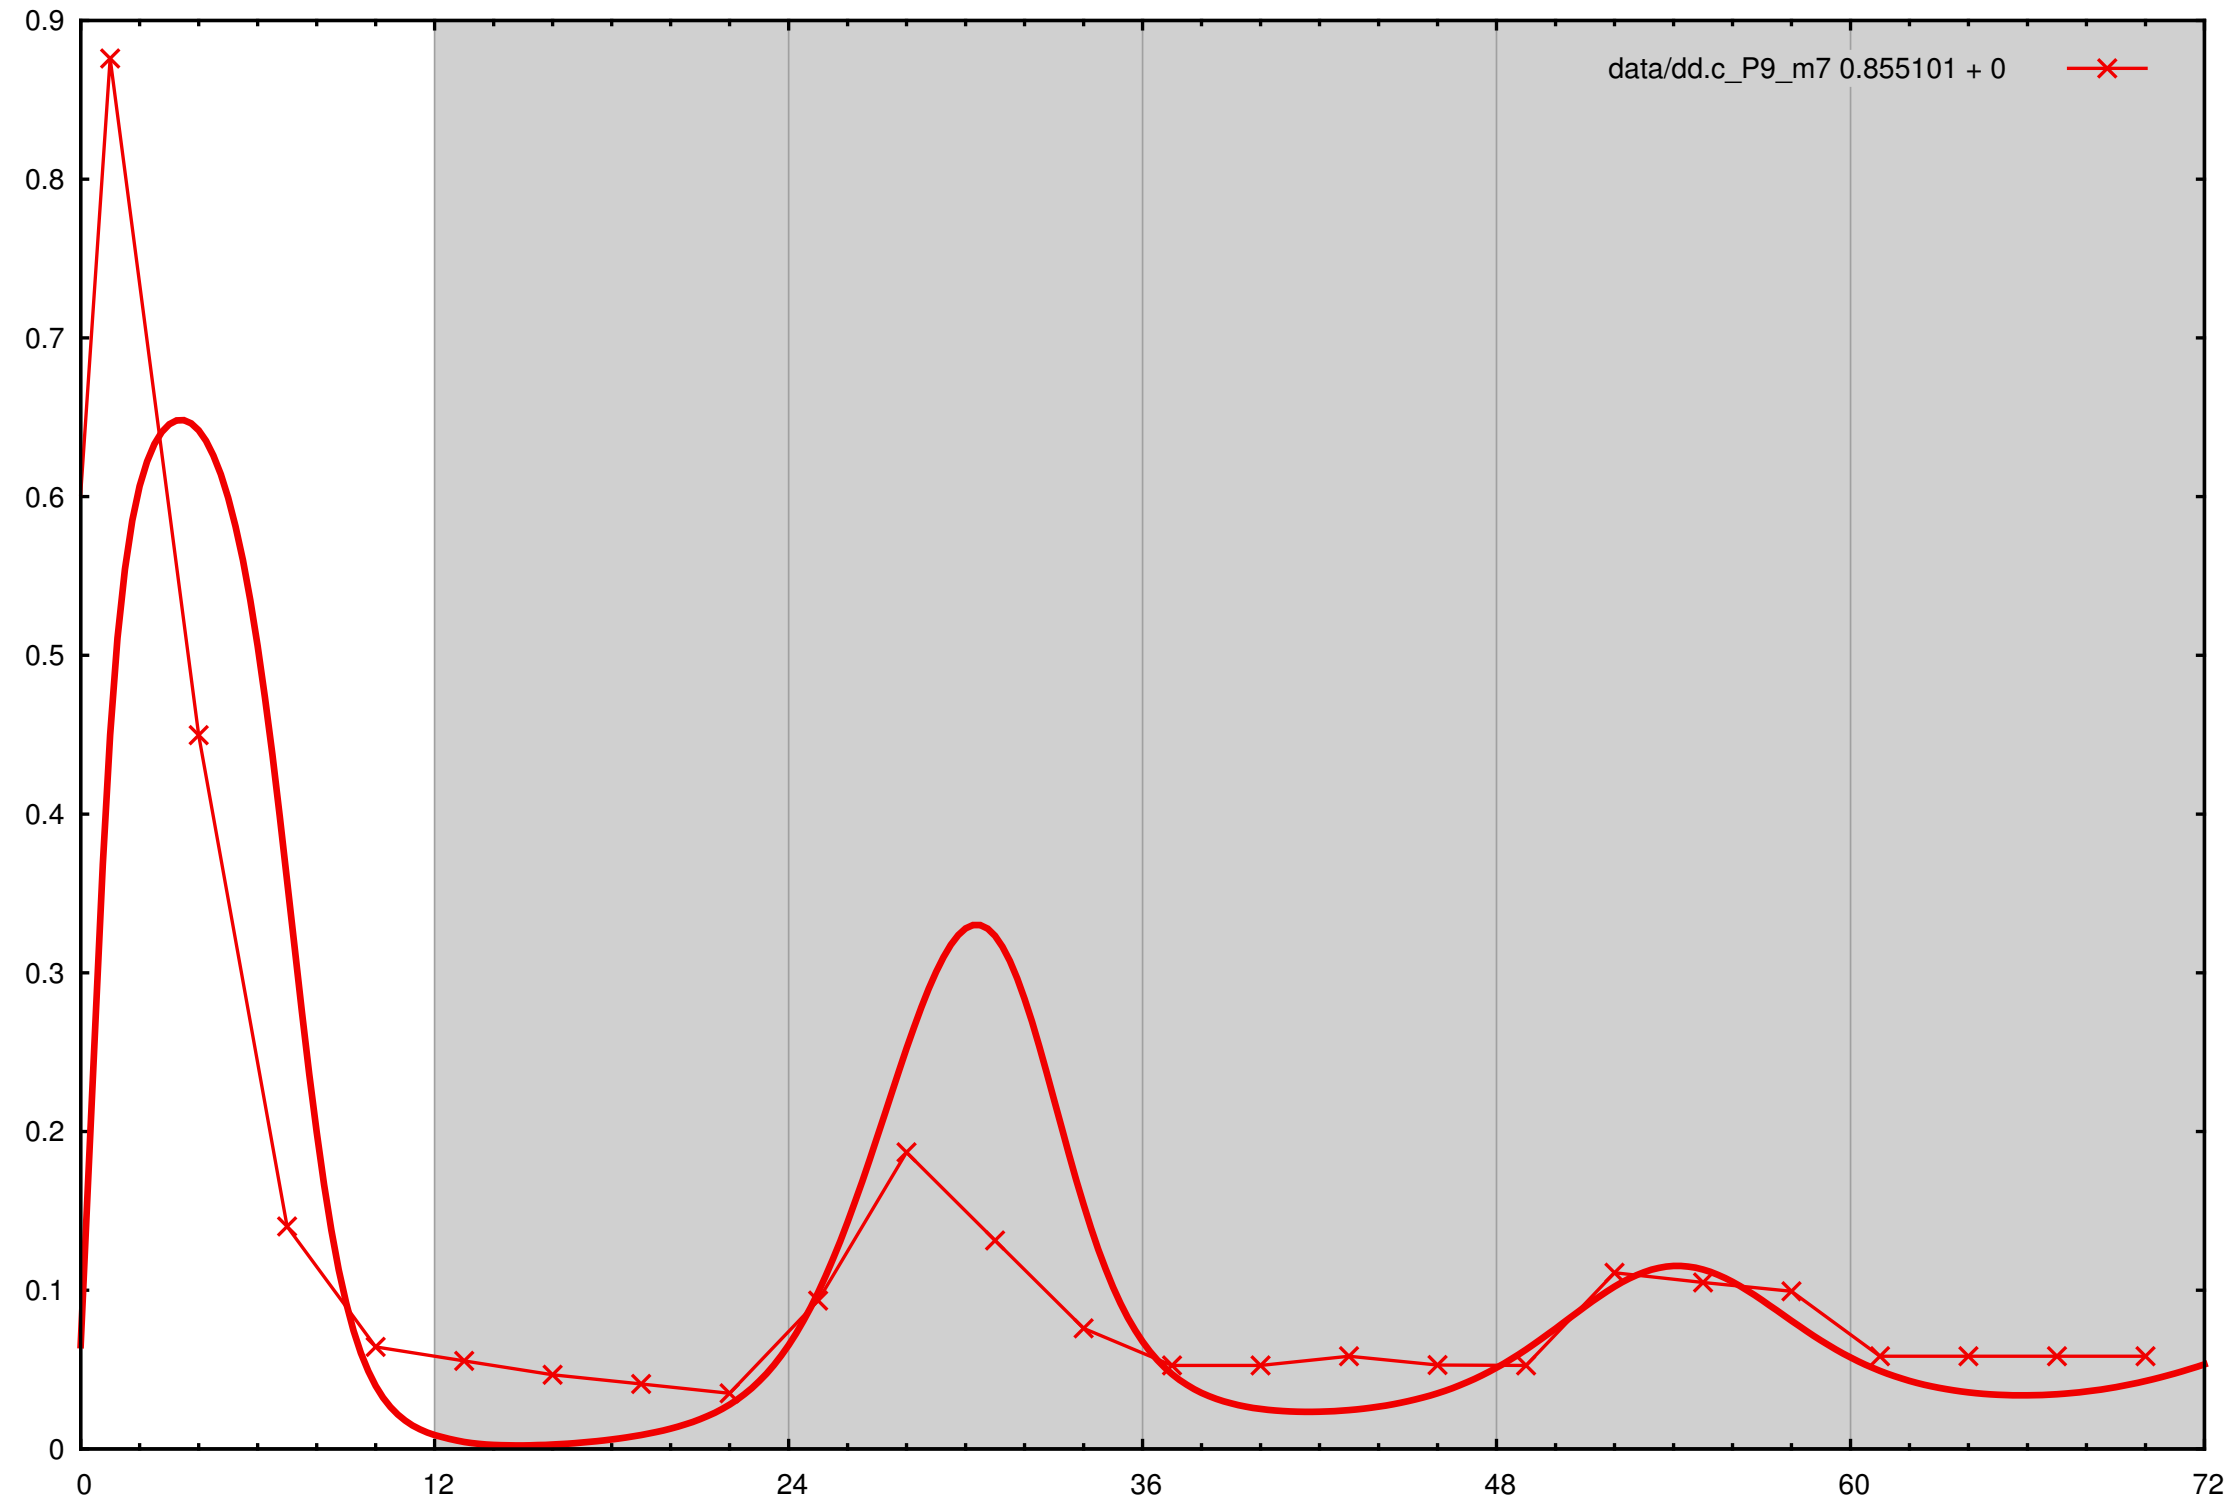

Scale group 334, scost 0

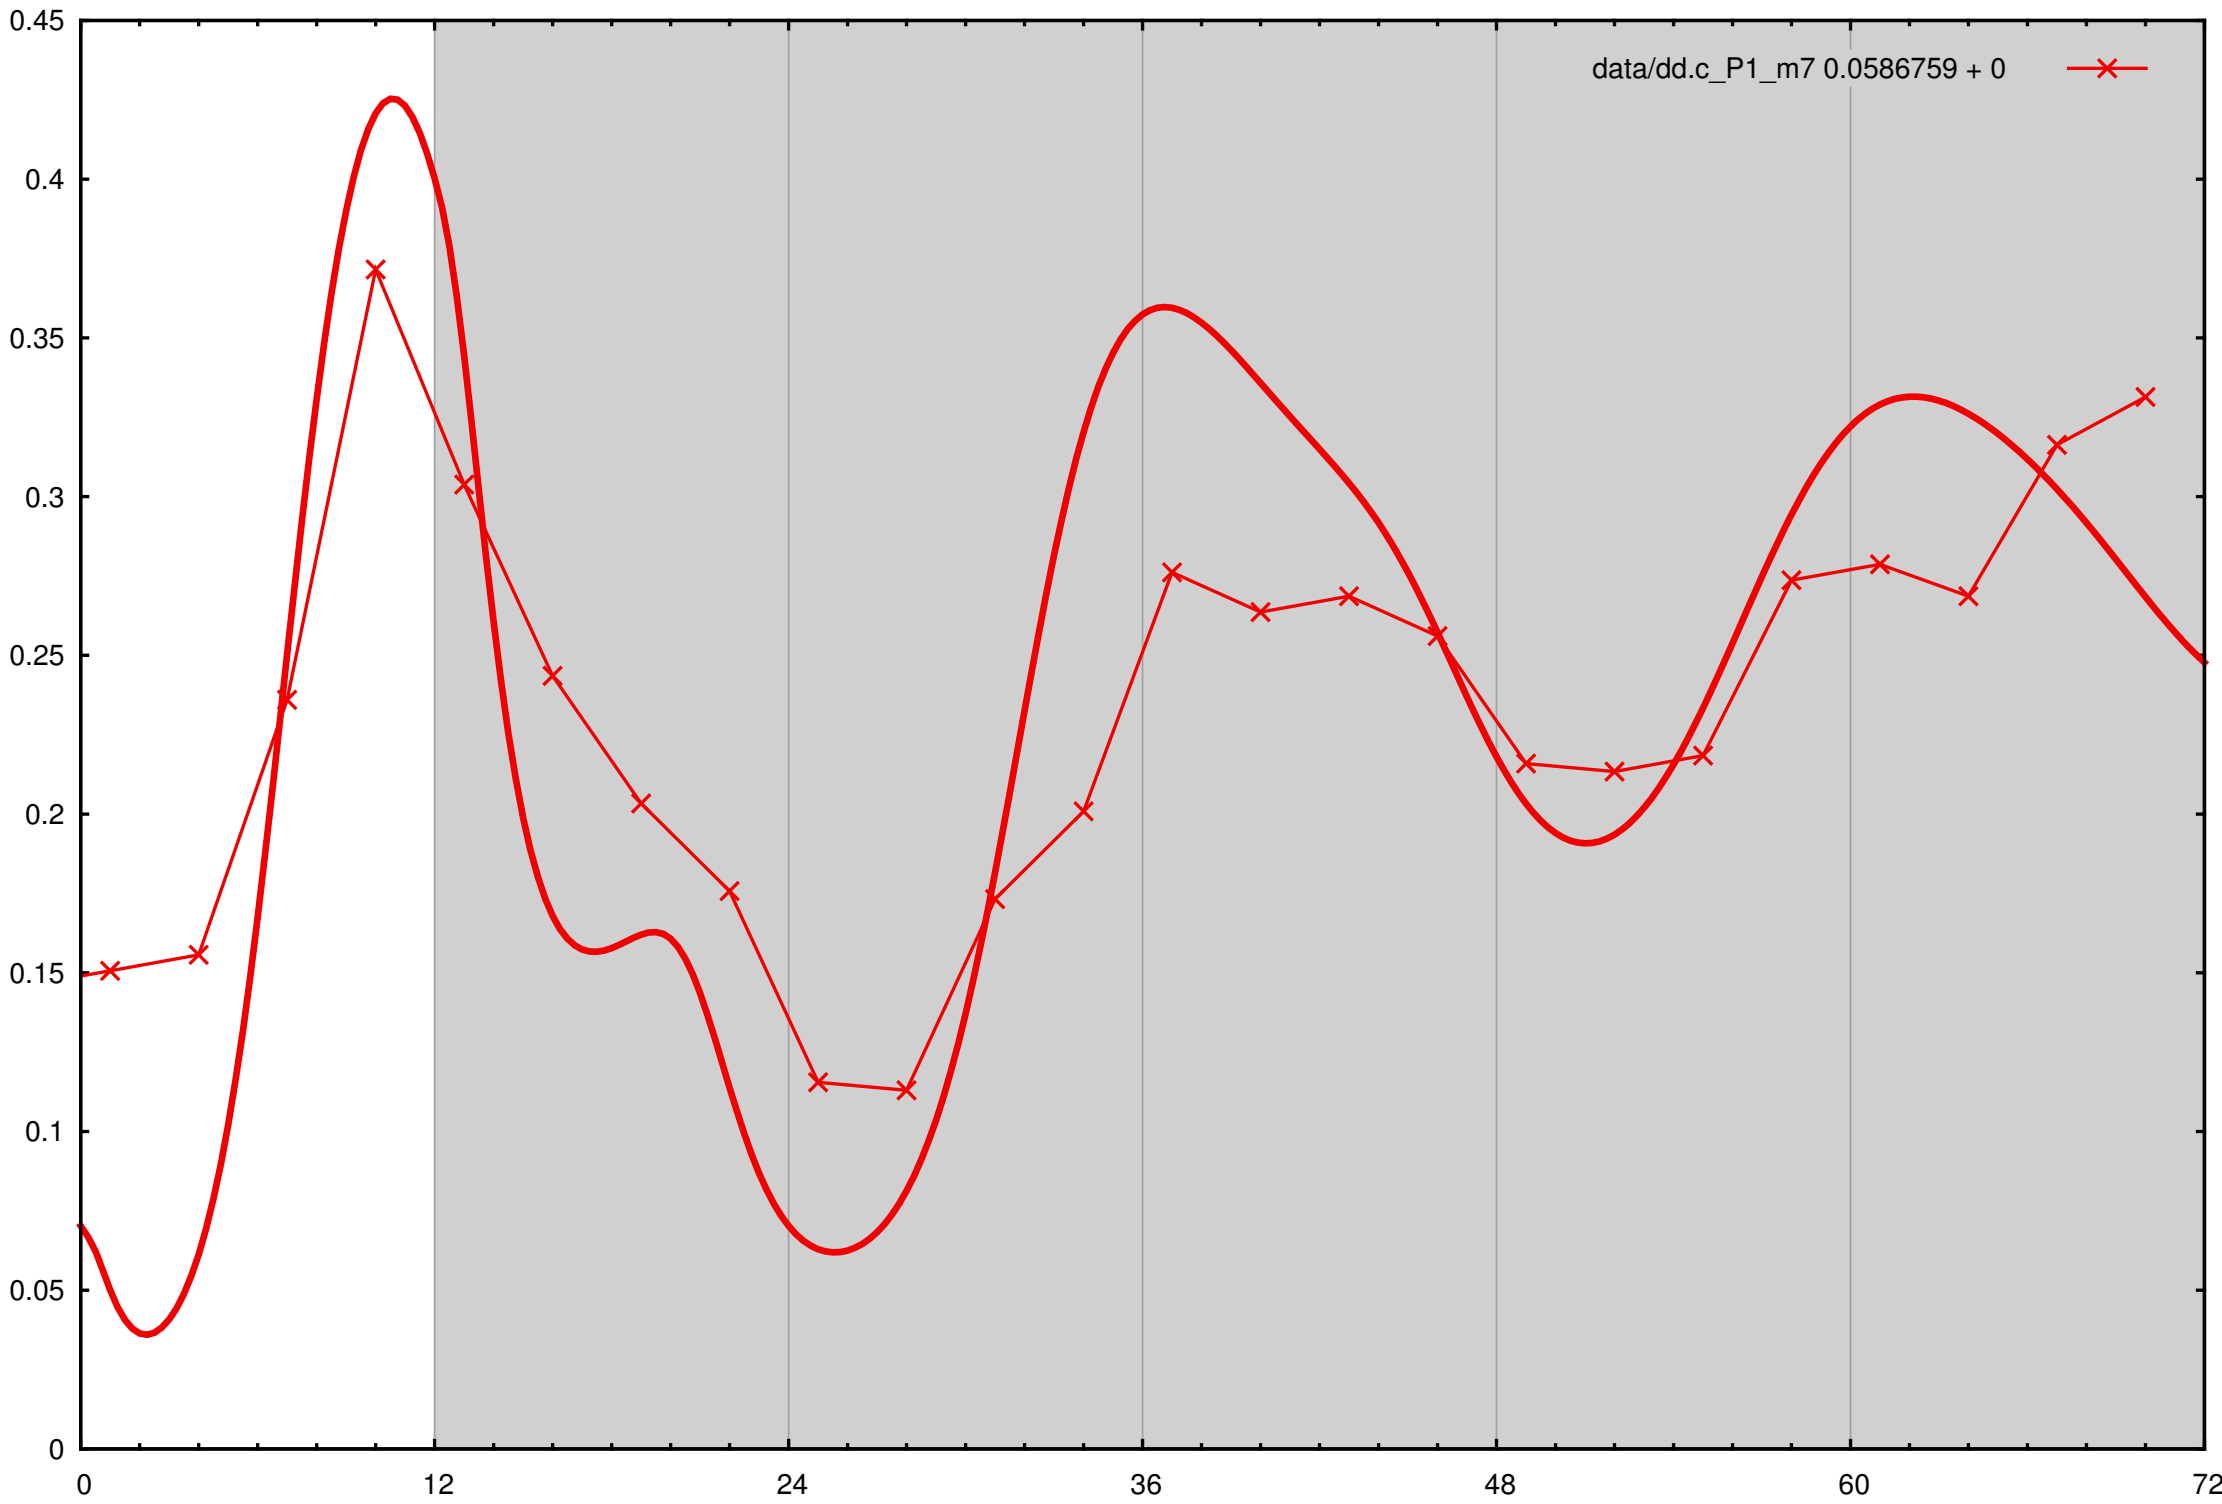

Scale group 335, scost 0

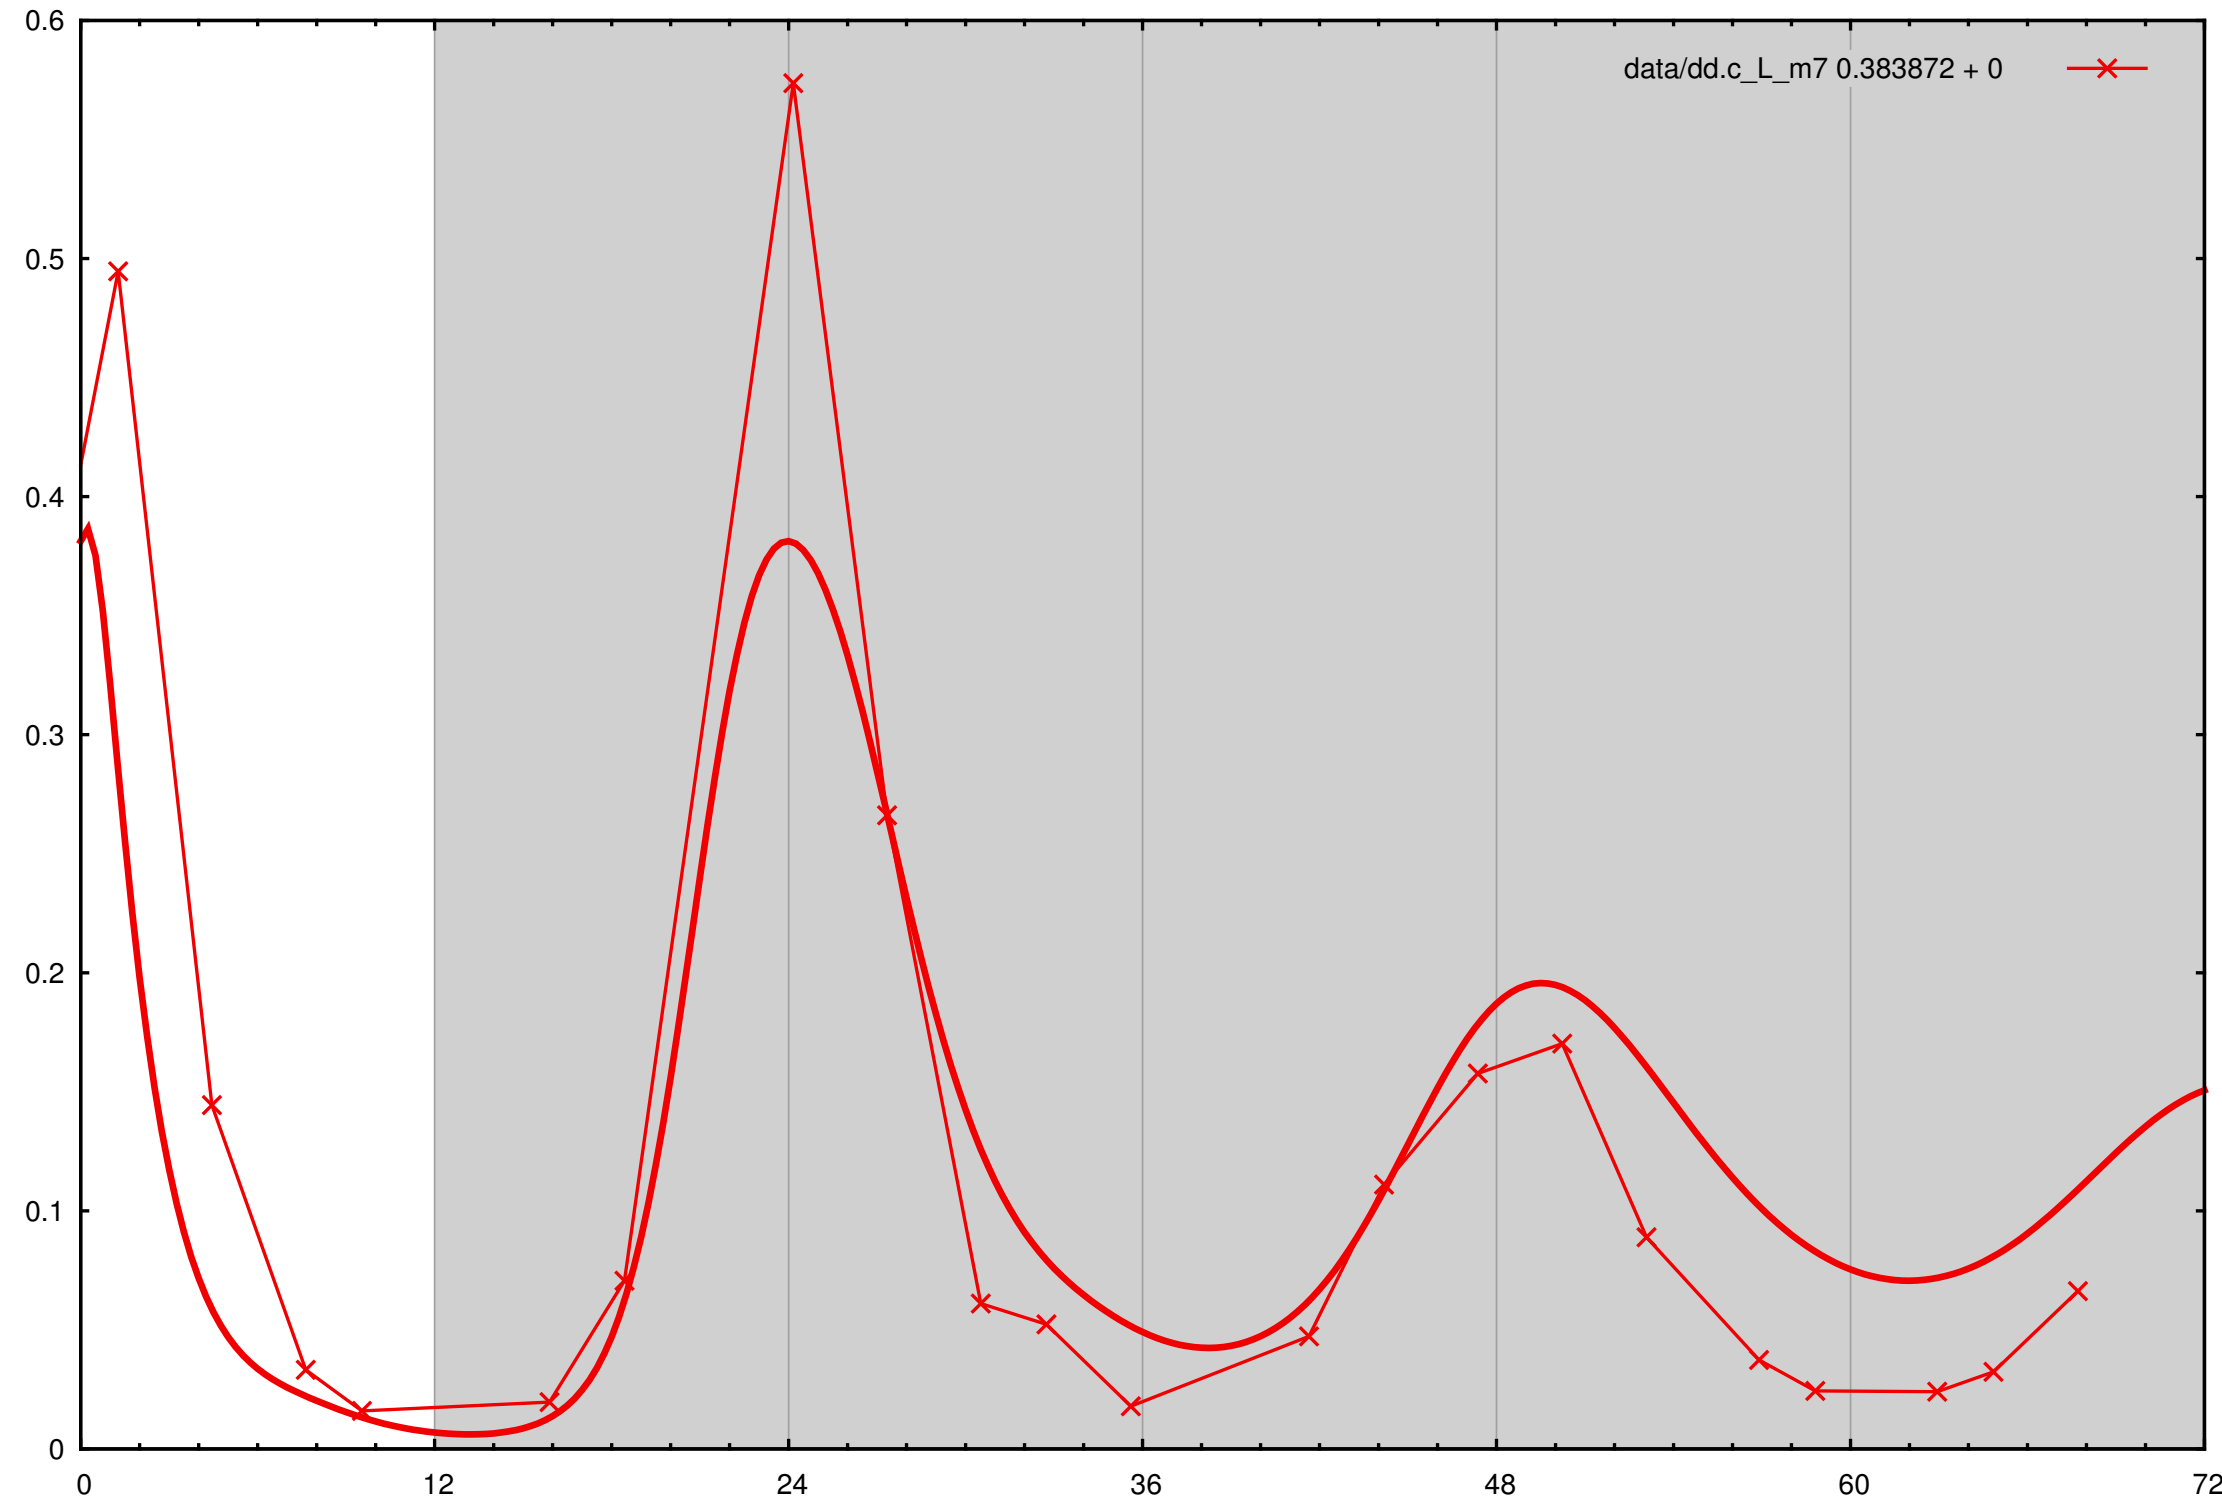

Scale group 336, scost 0

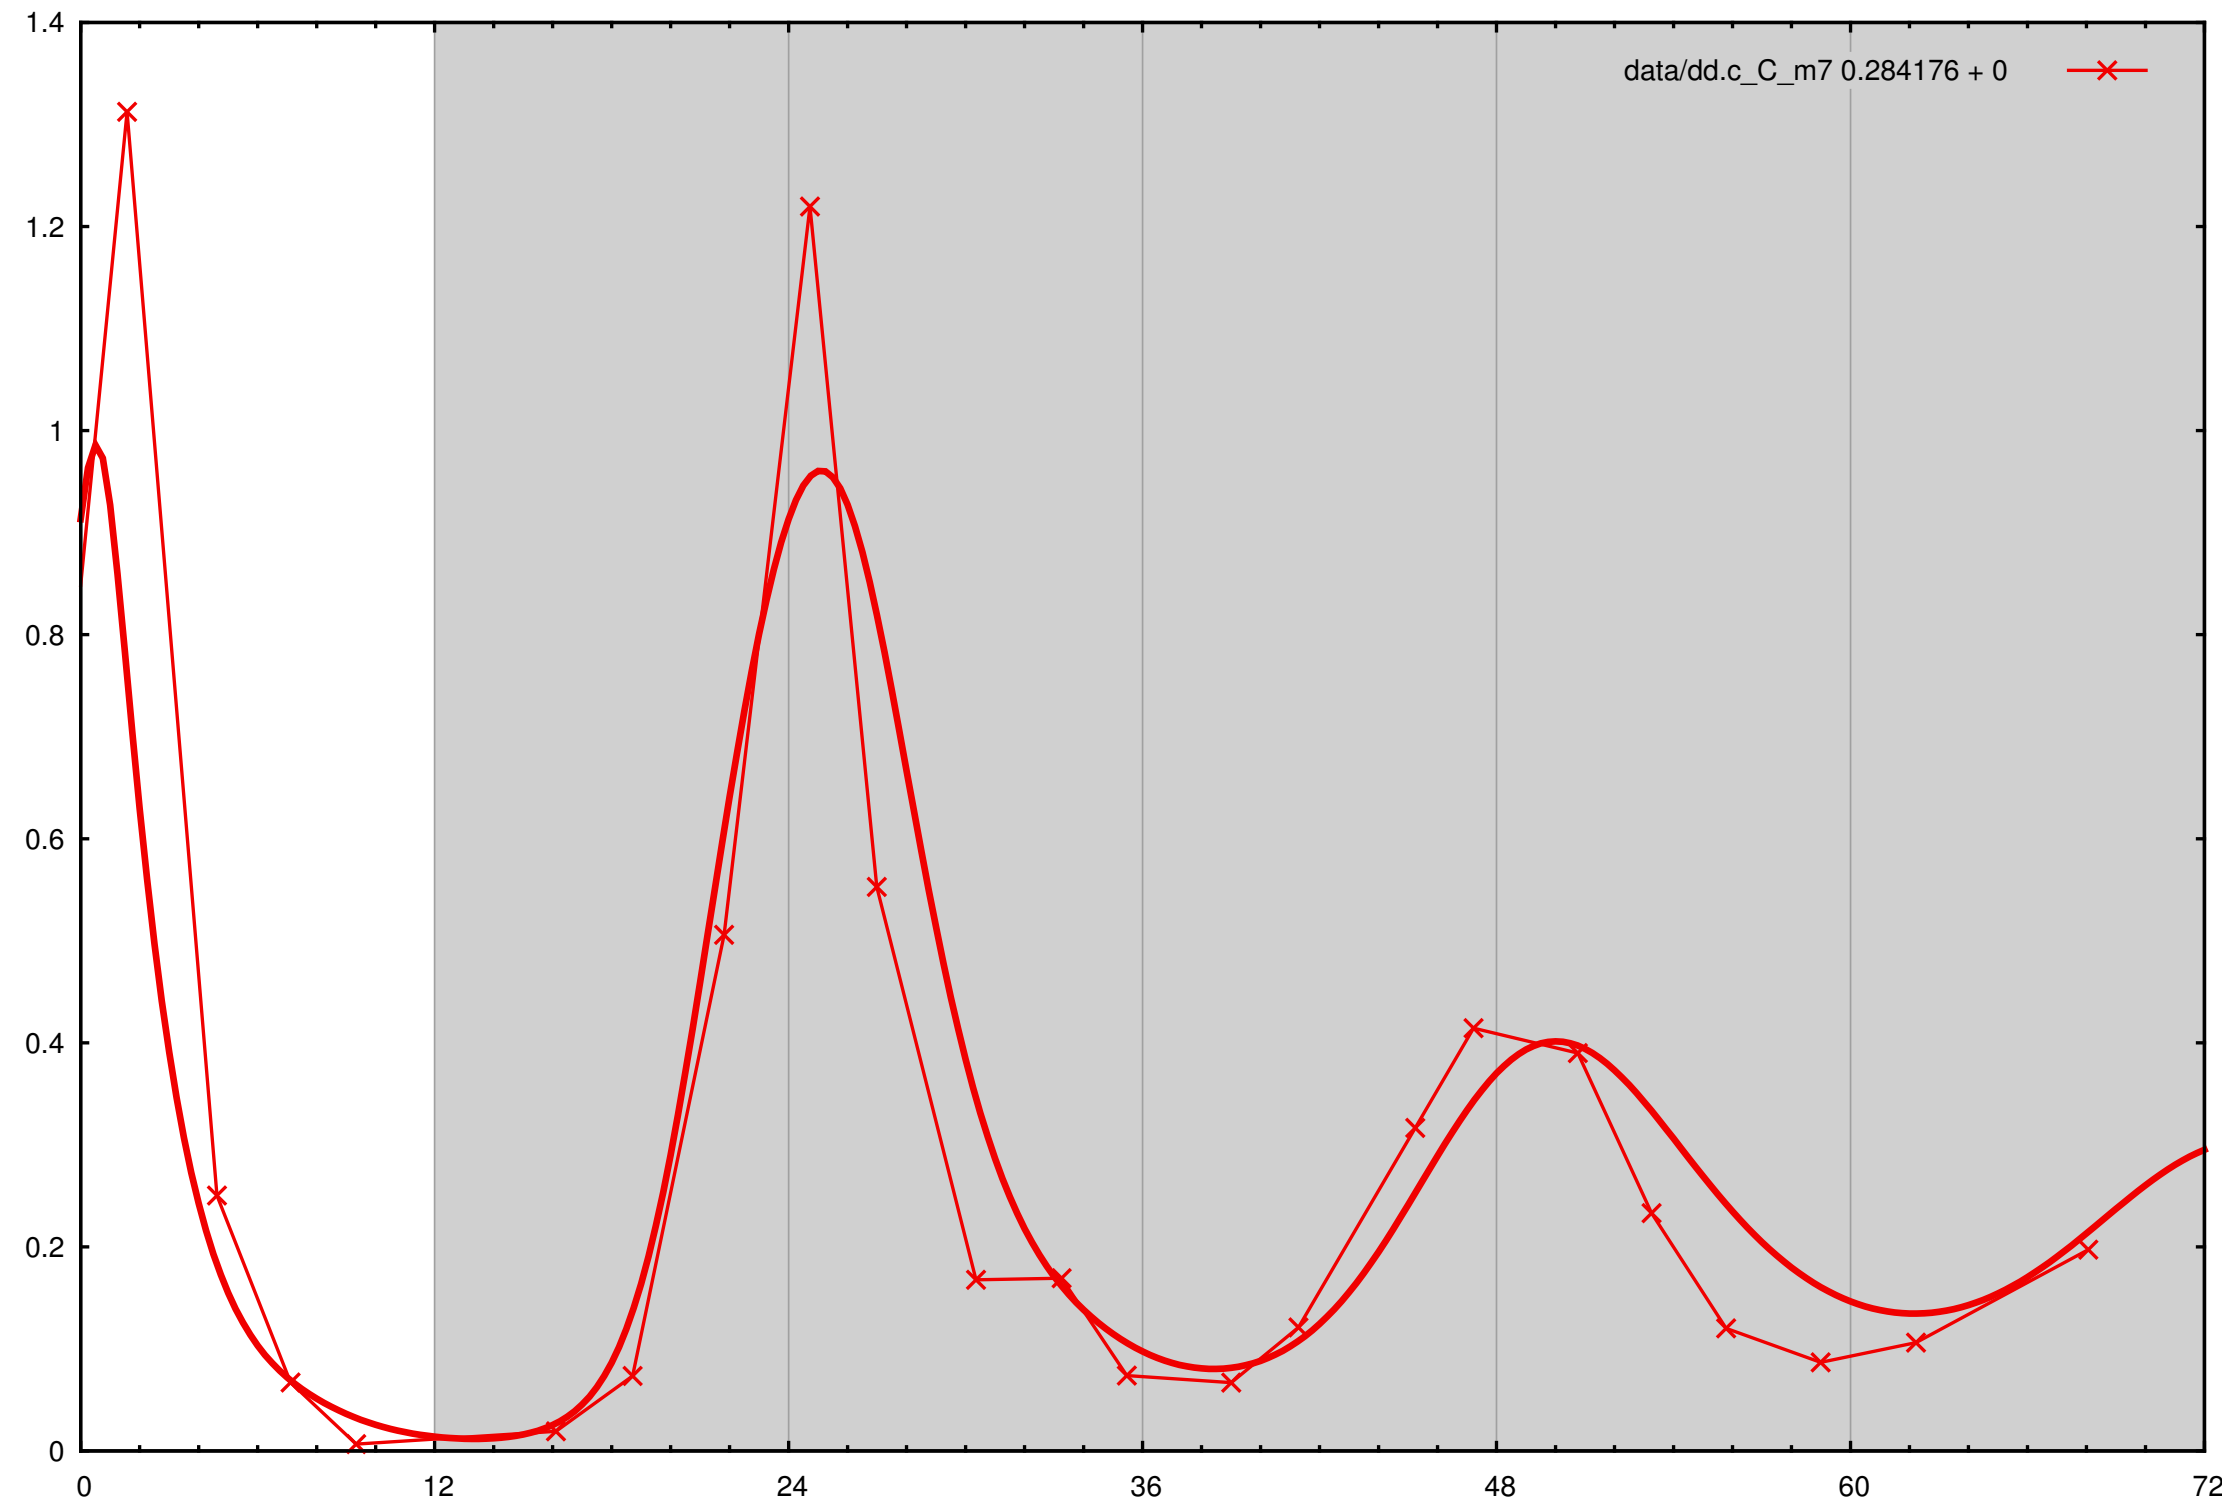



Scale group 337, scost 0

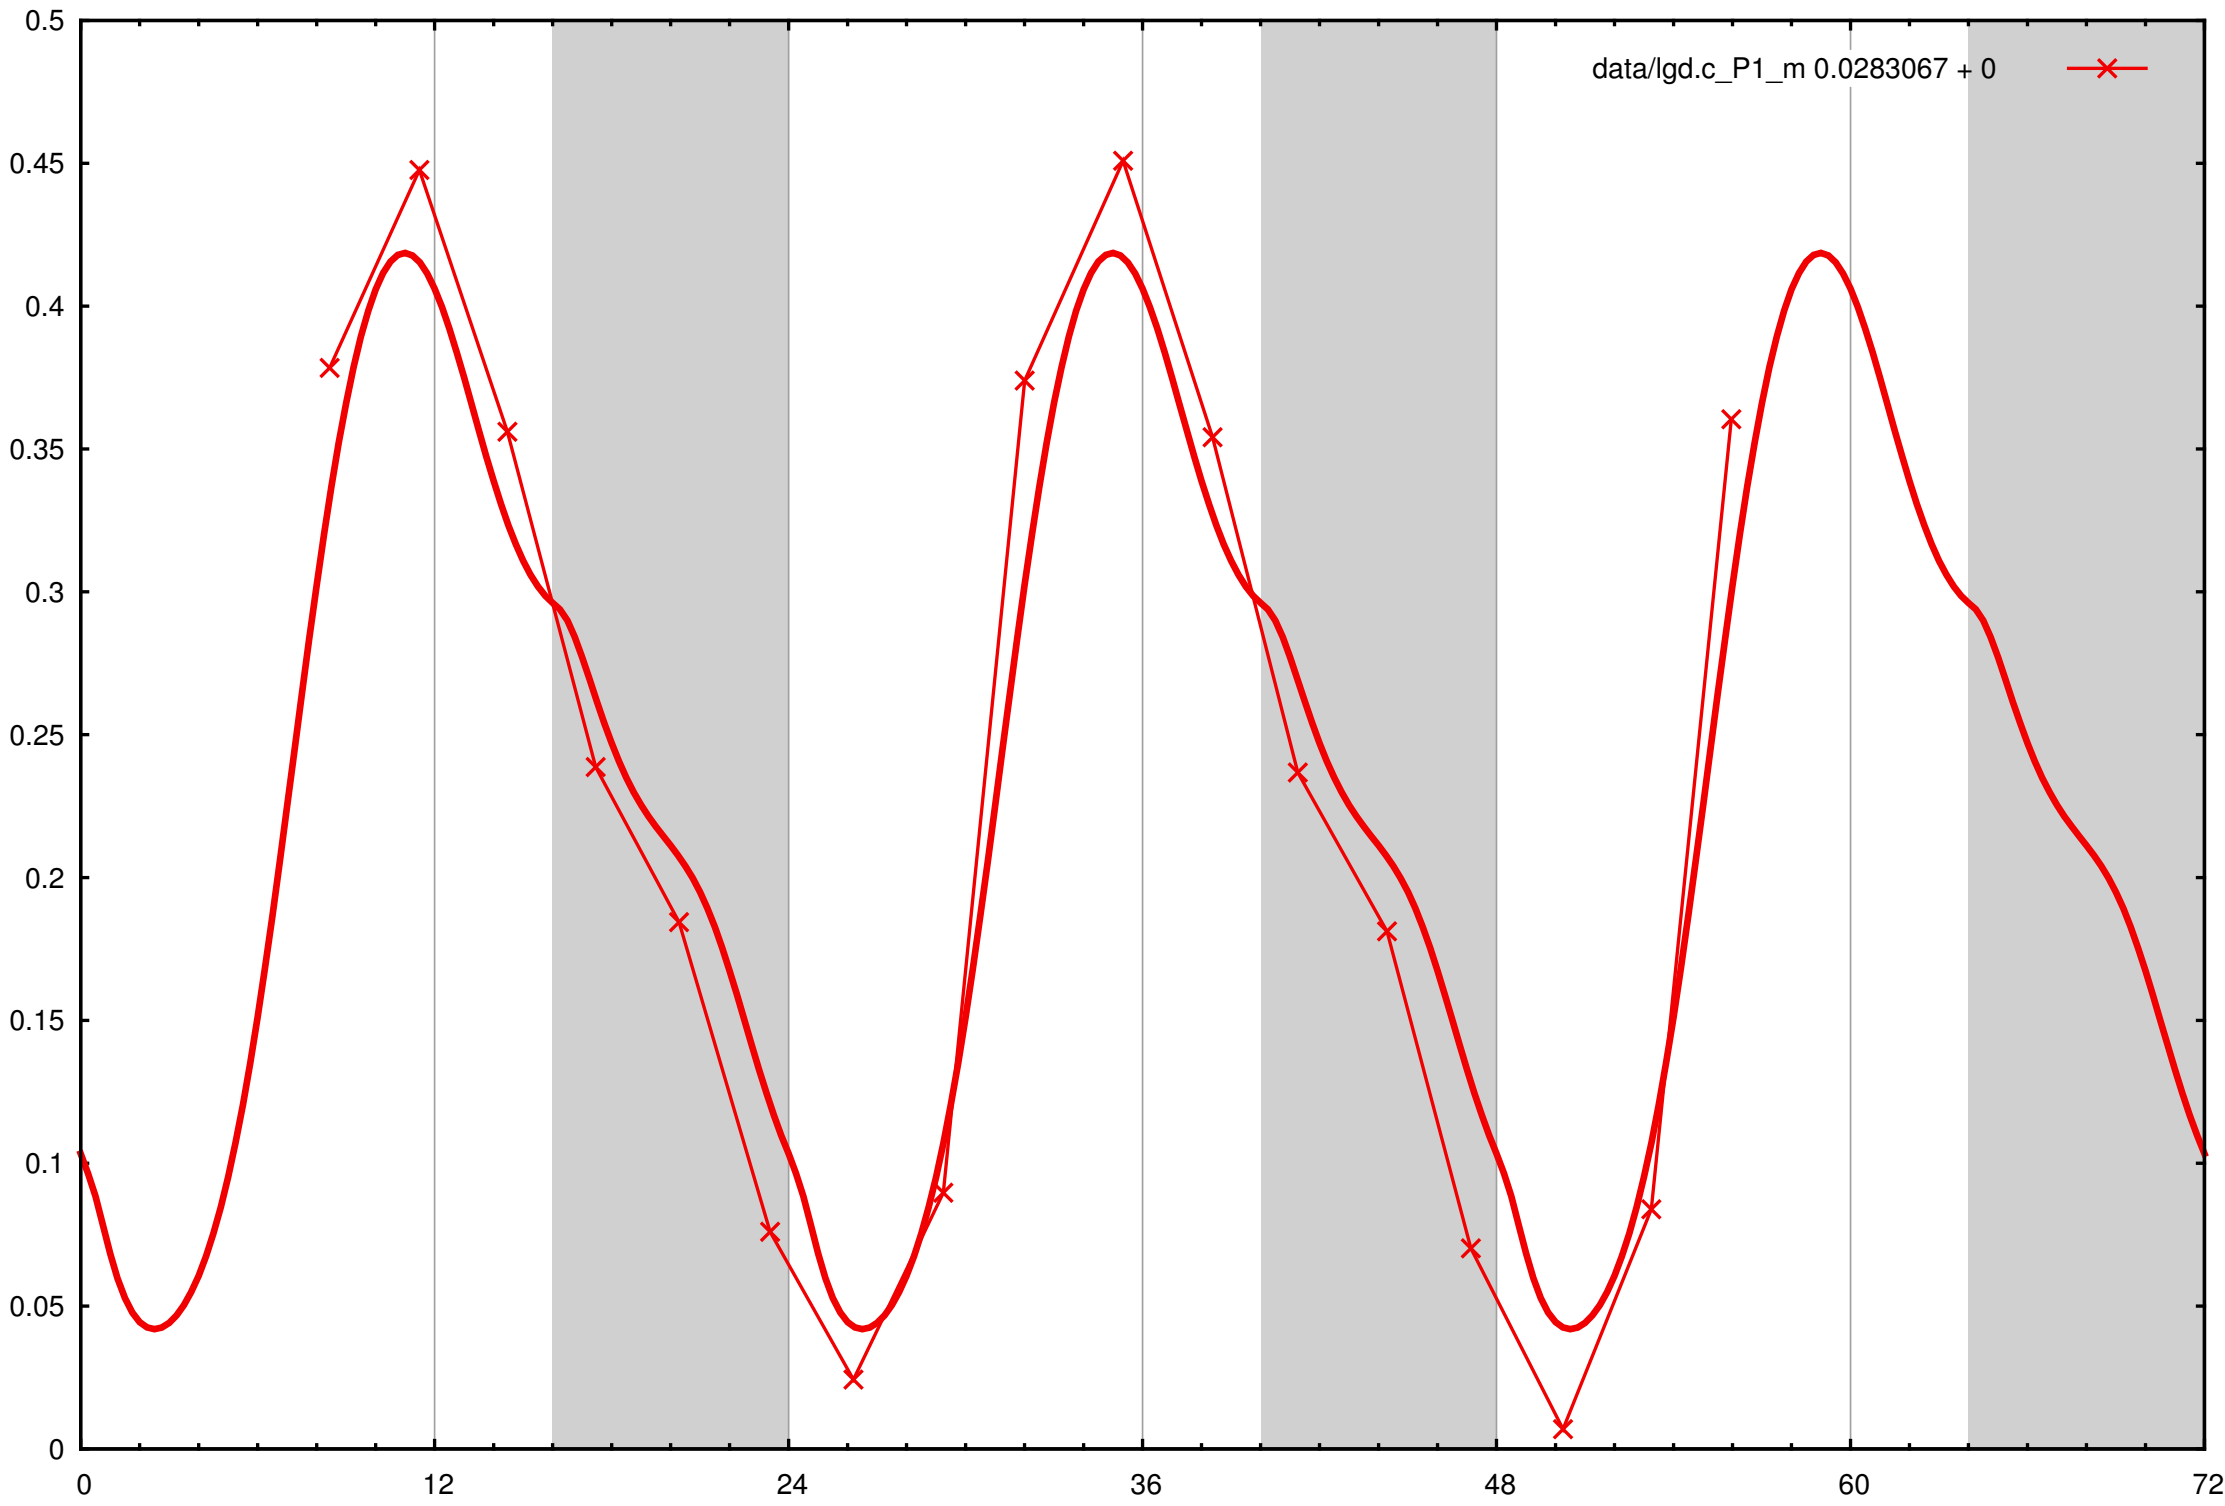

Scale group 338, scost 0

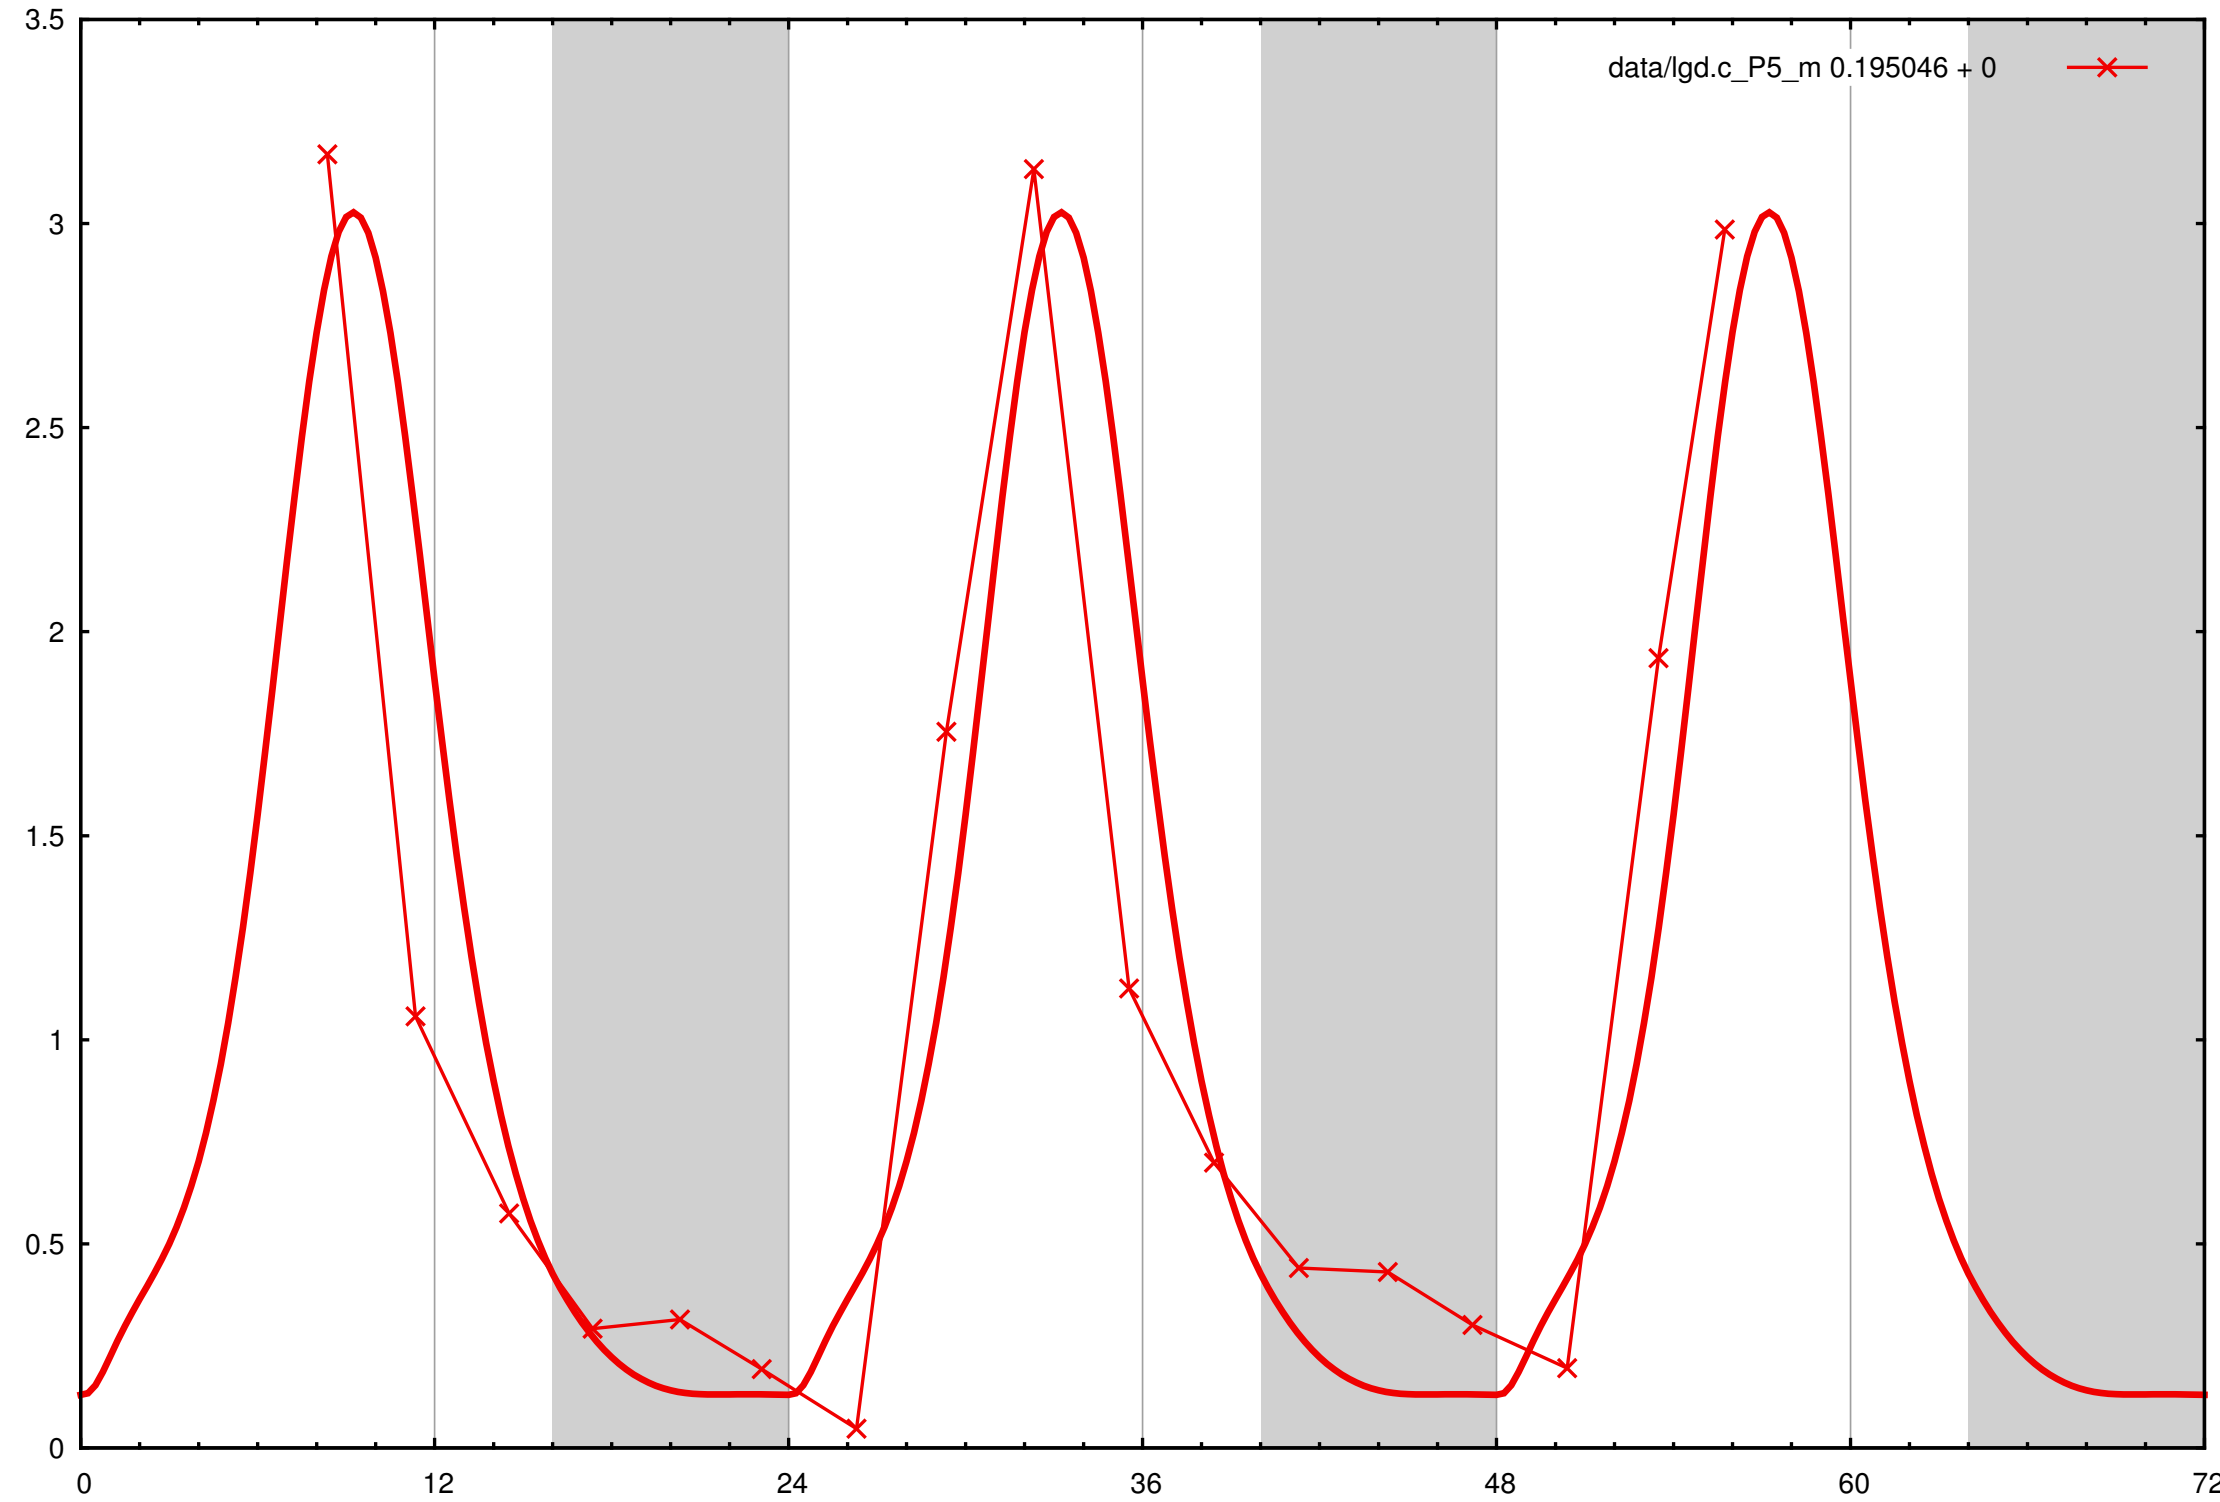

Scale group 339, scost 0

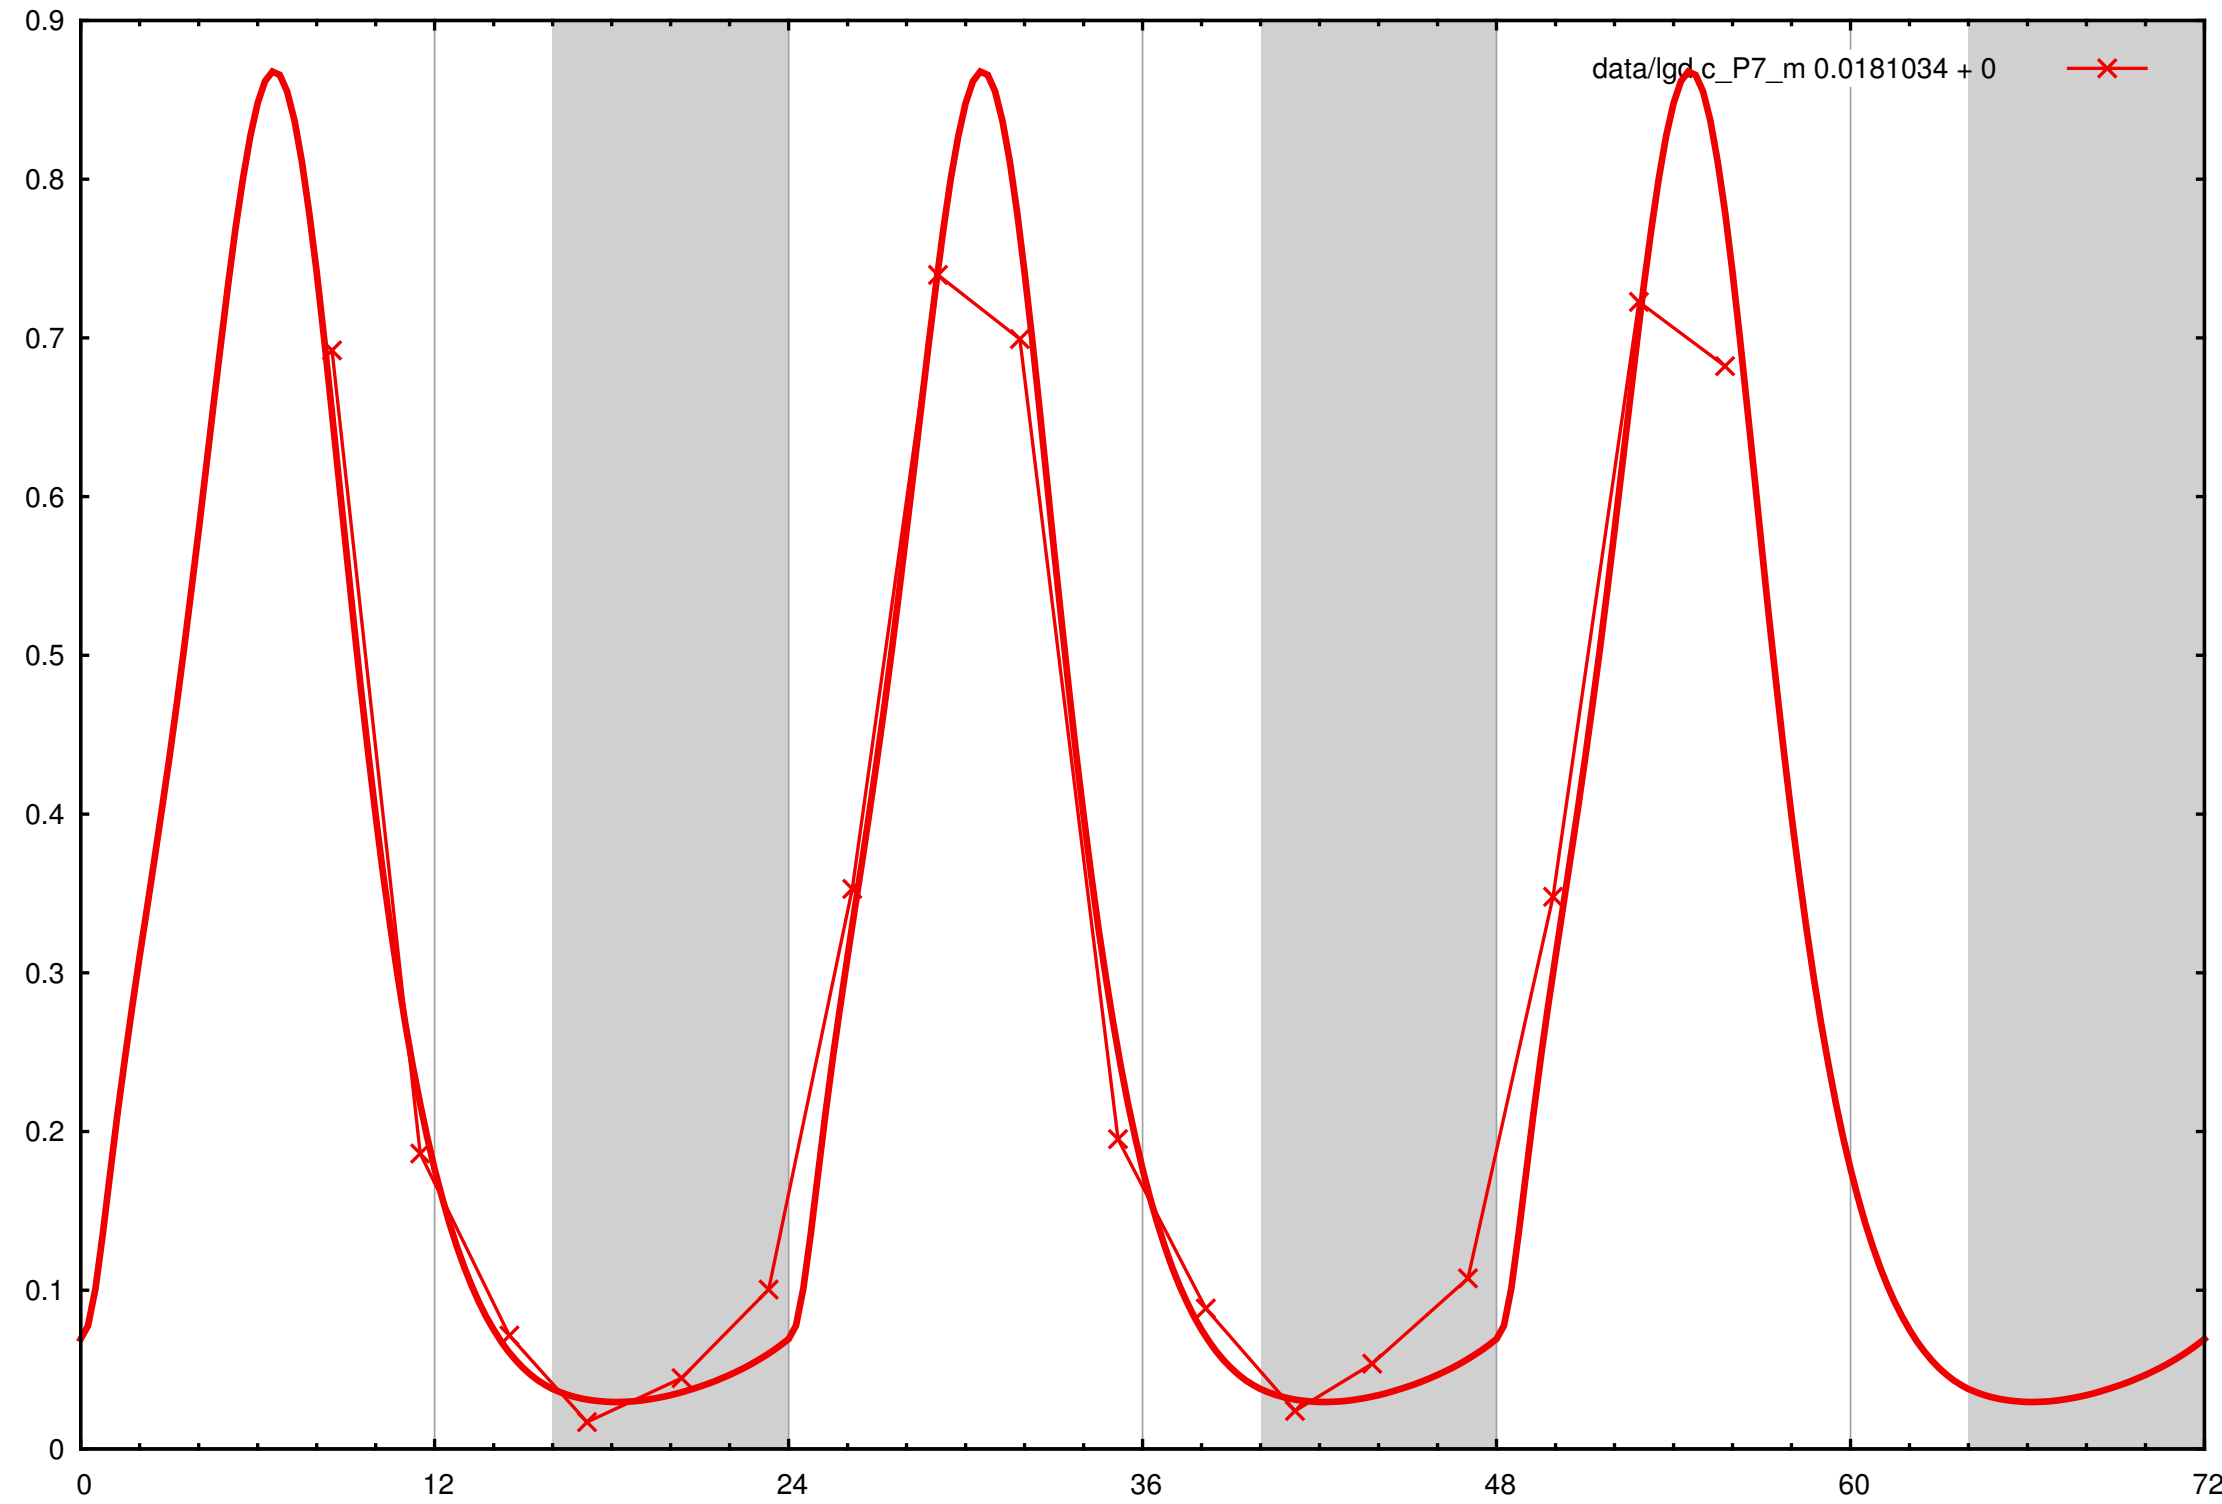

Scale group 340, scost 0

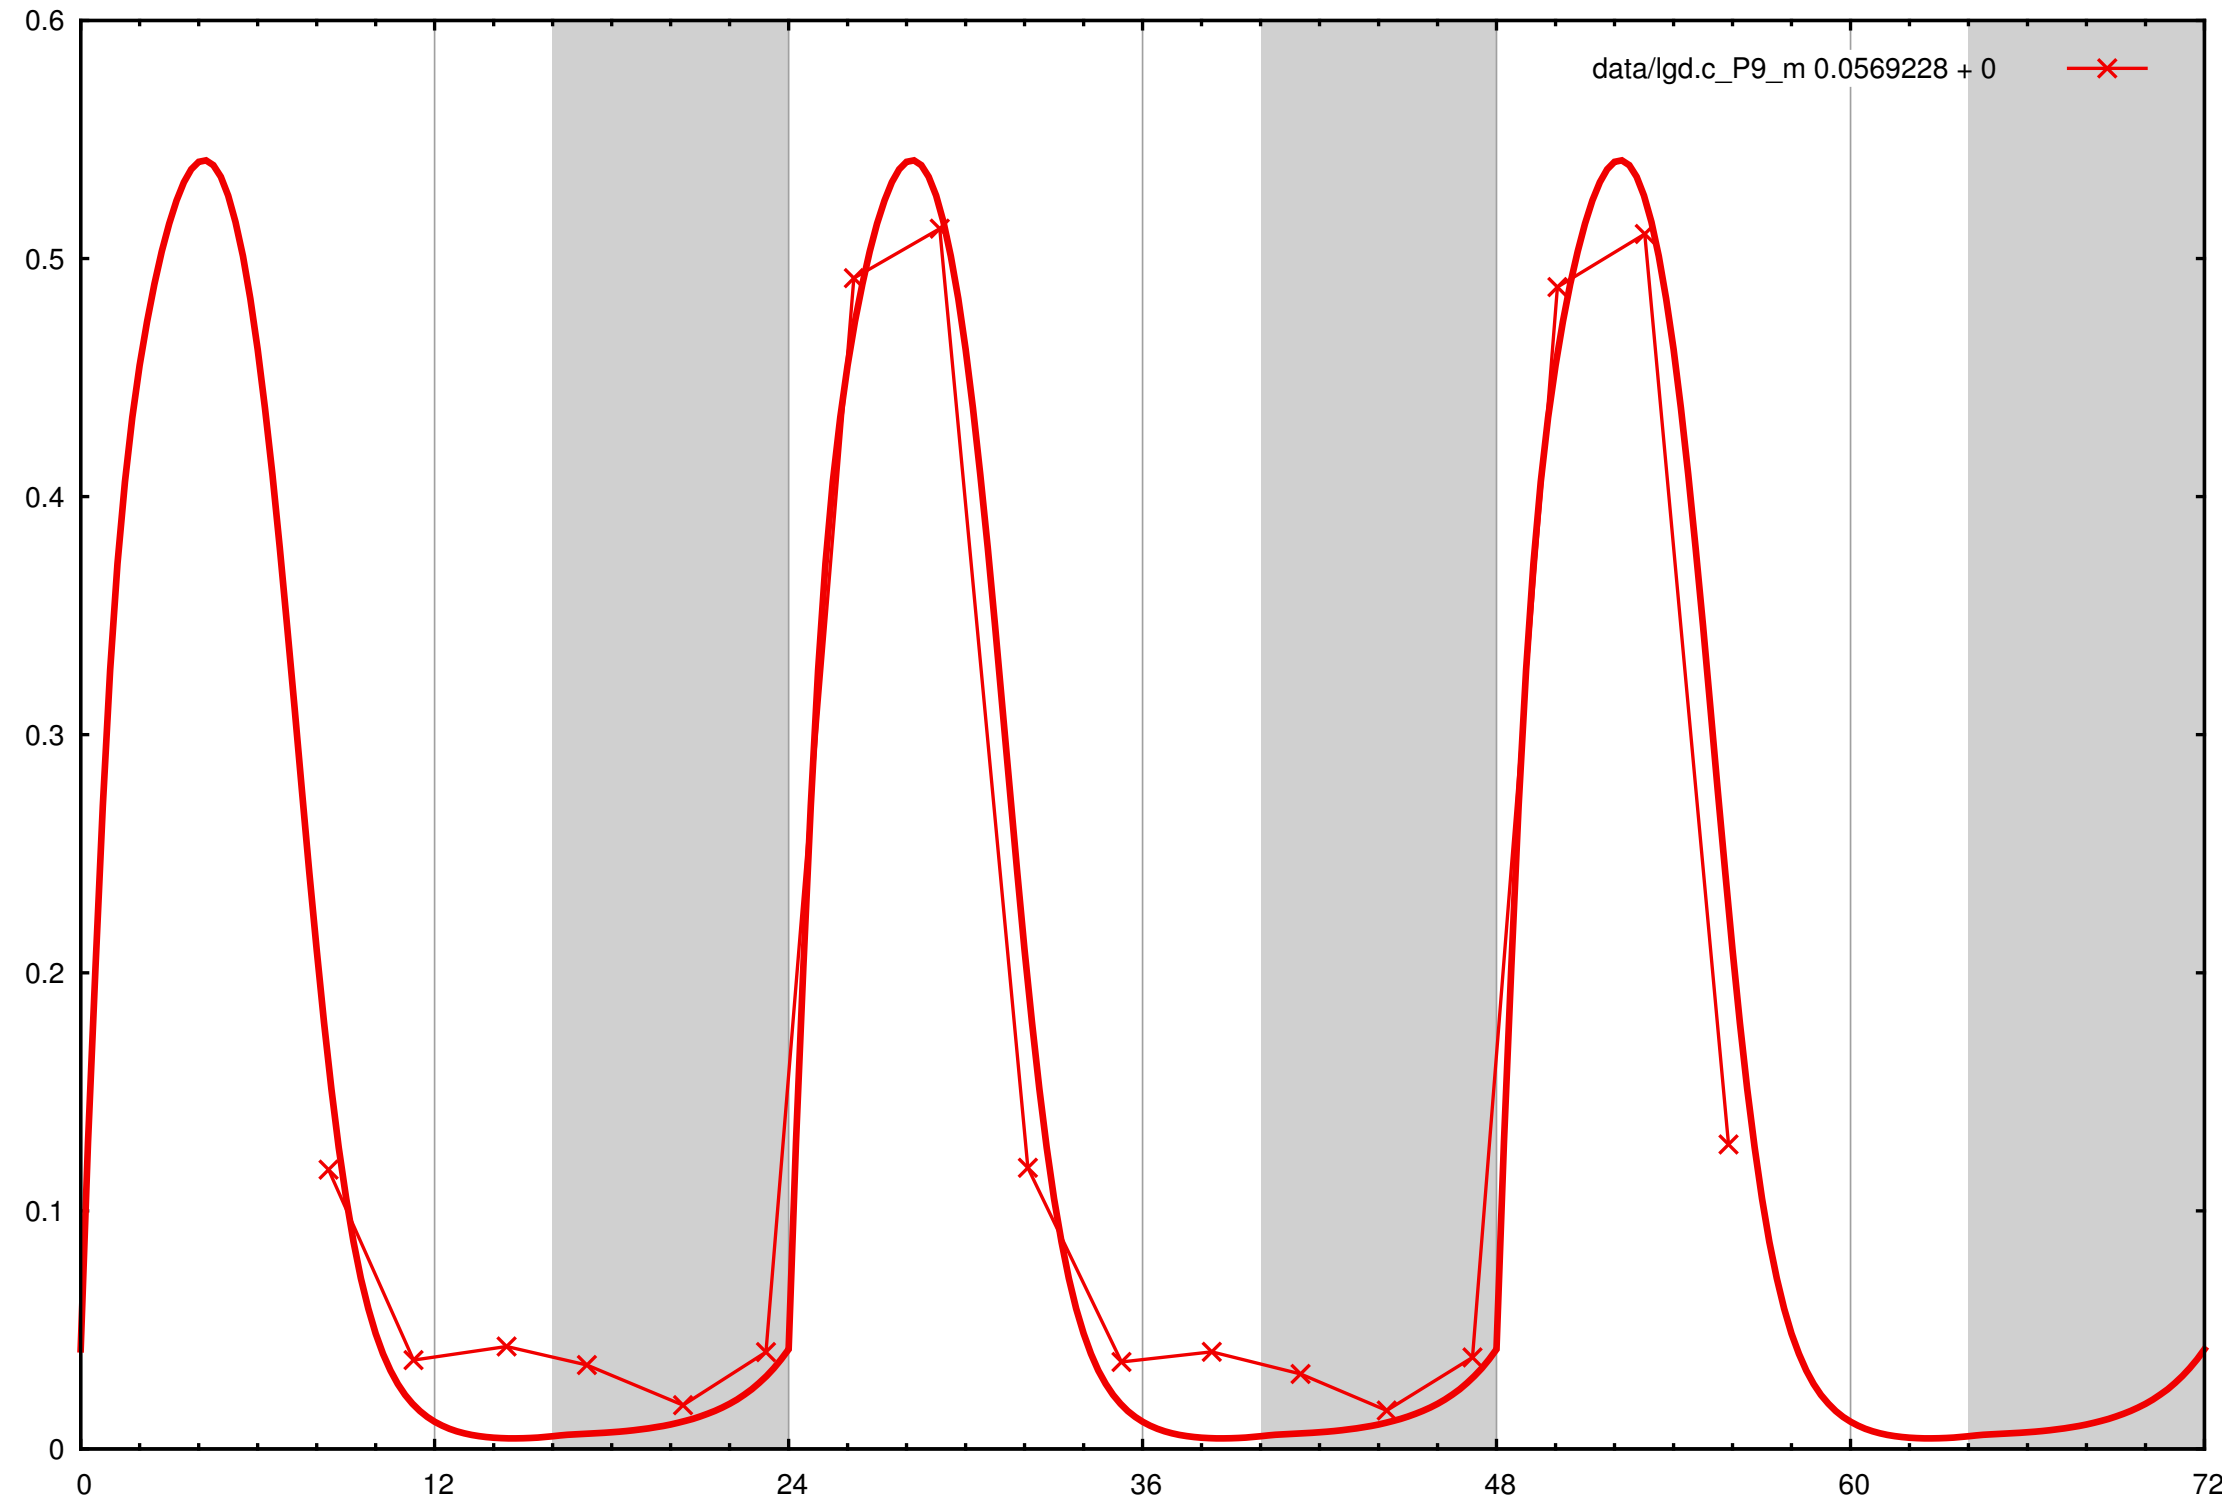

Scale group 341, scost 0

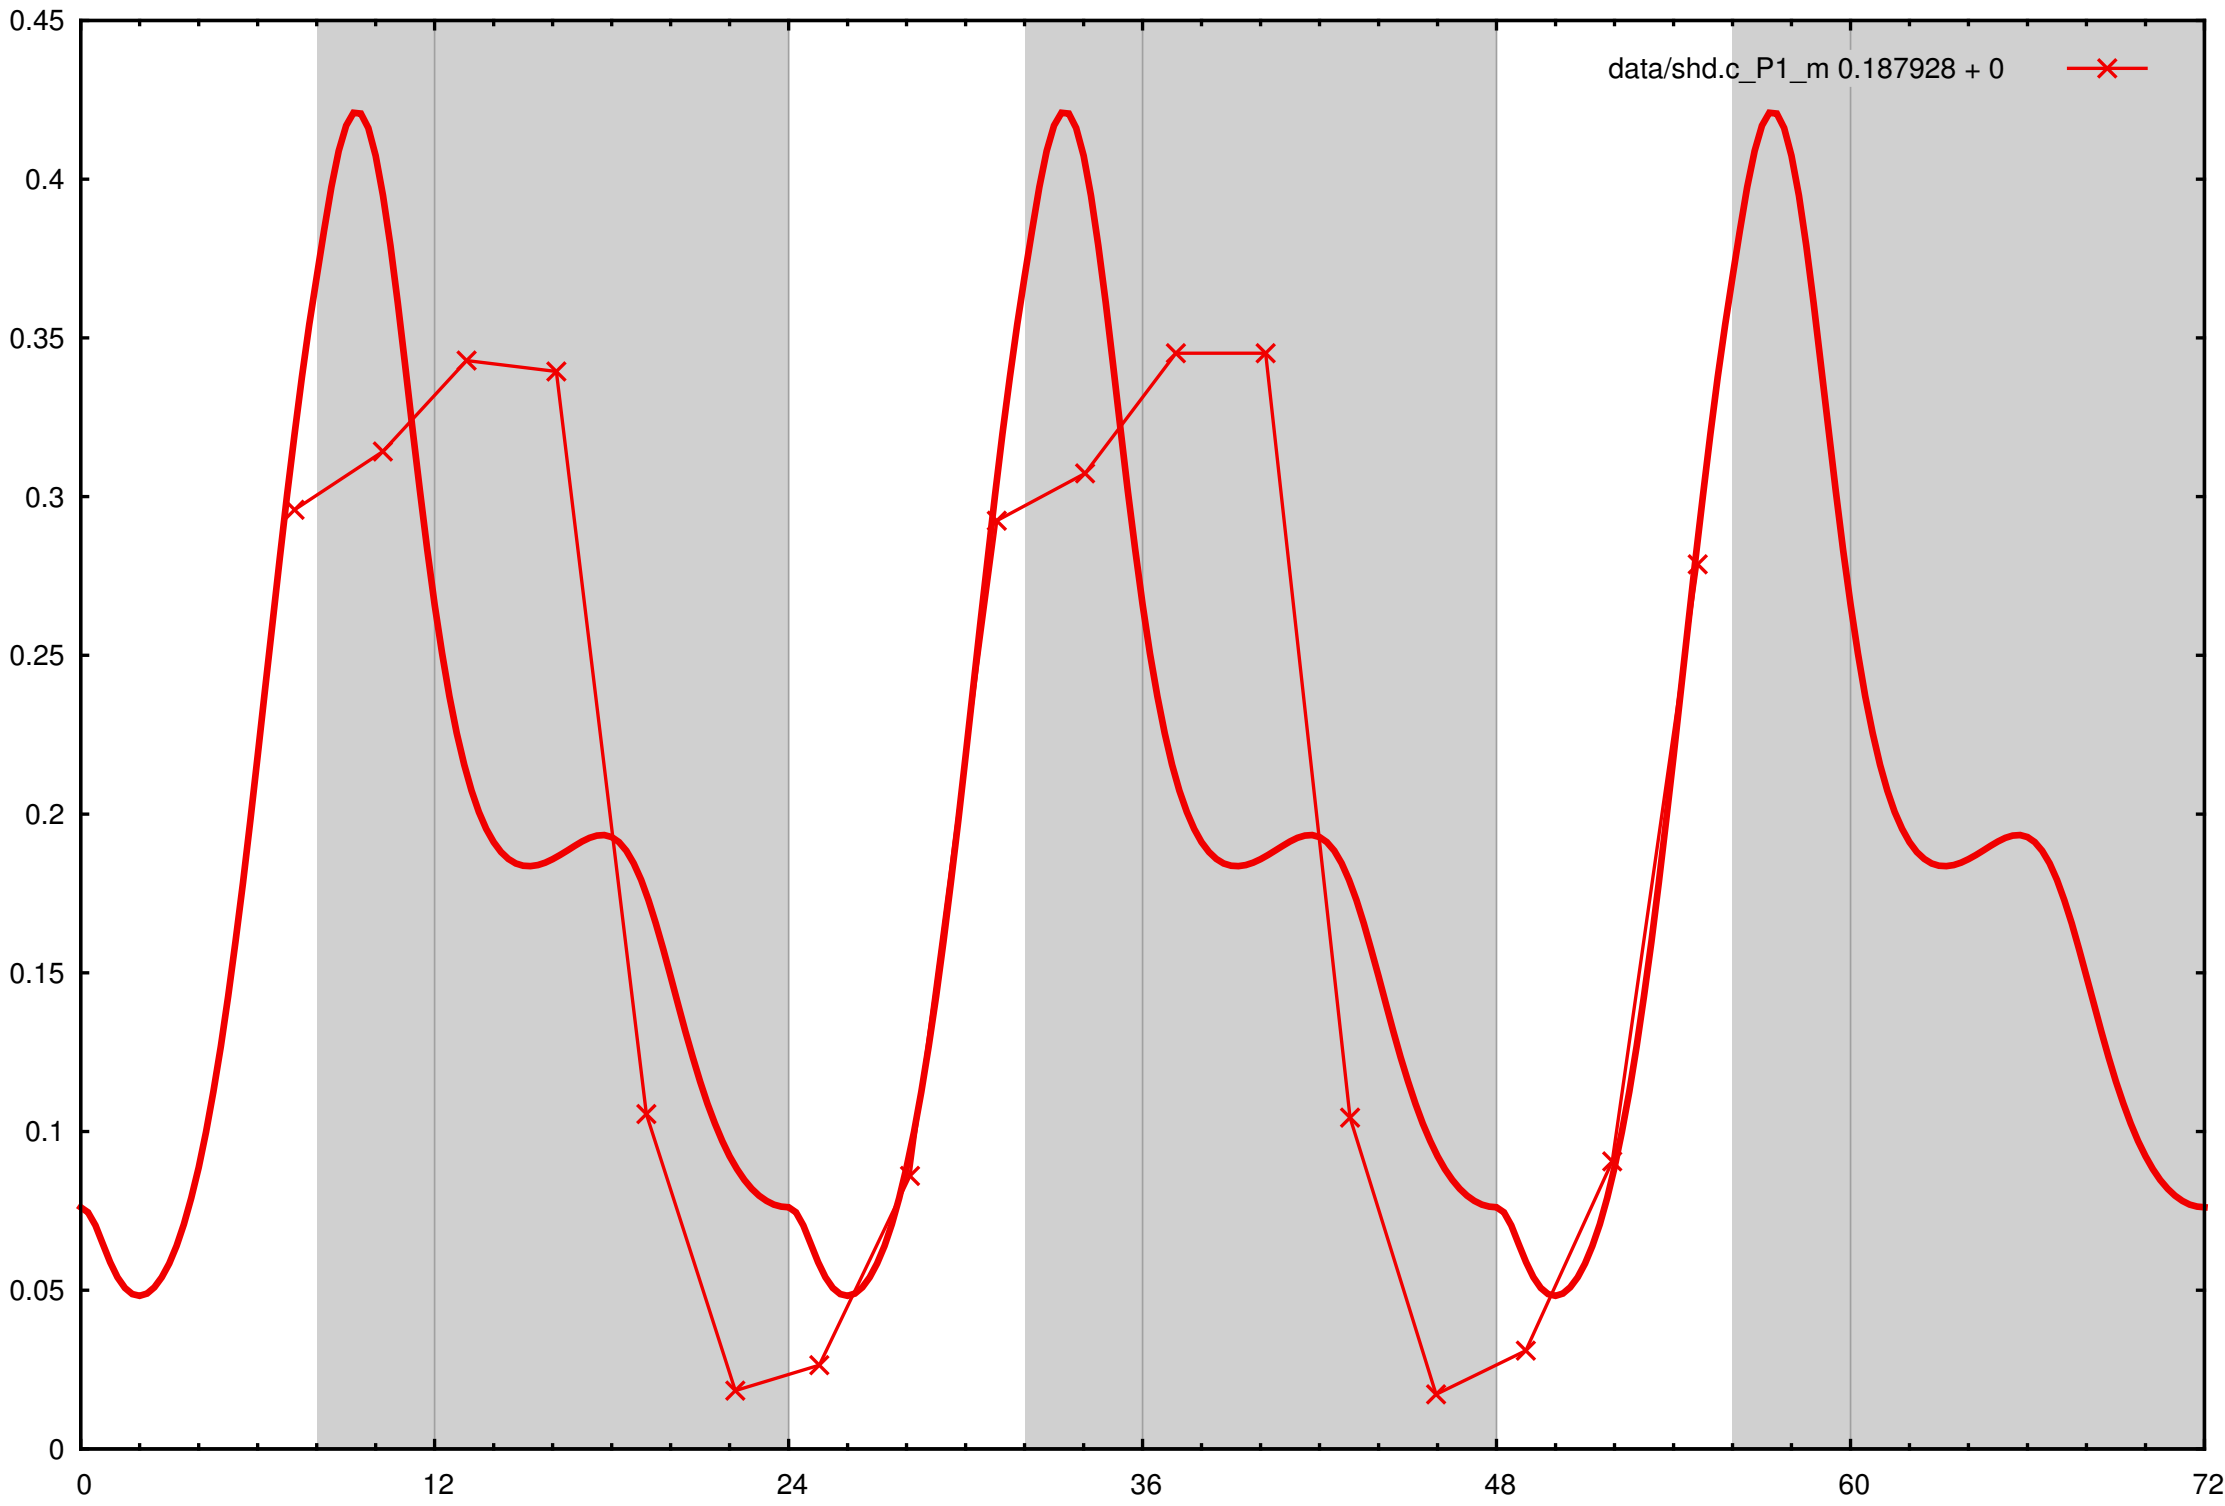

Scale group 342, scost 0

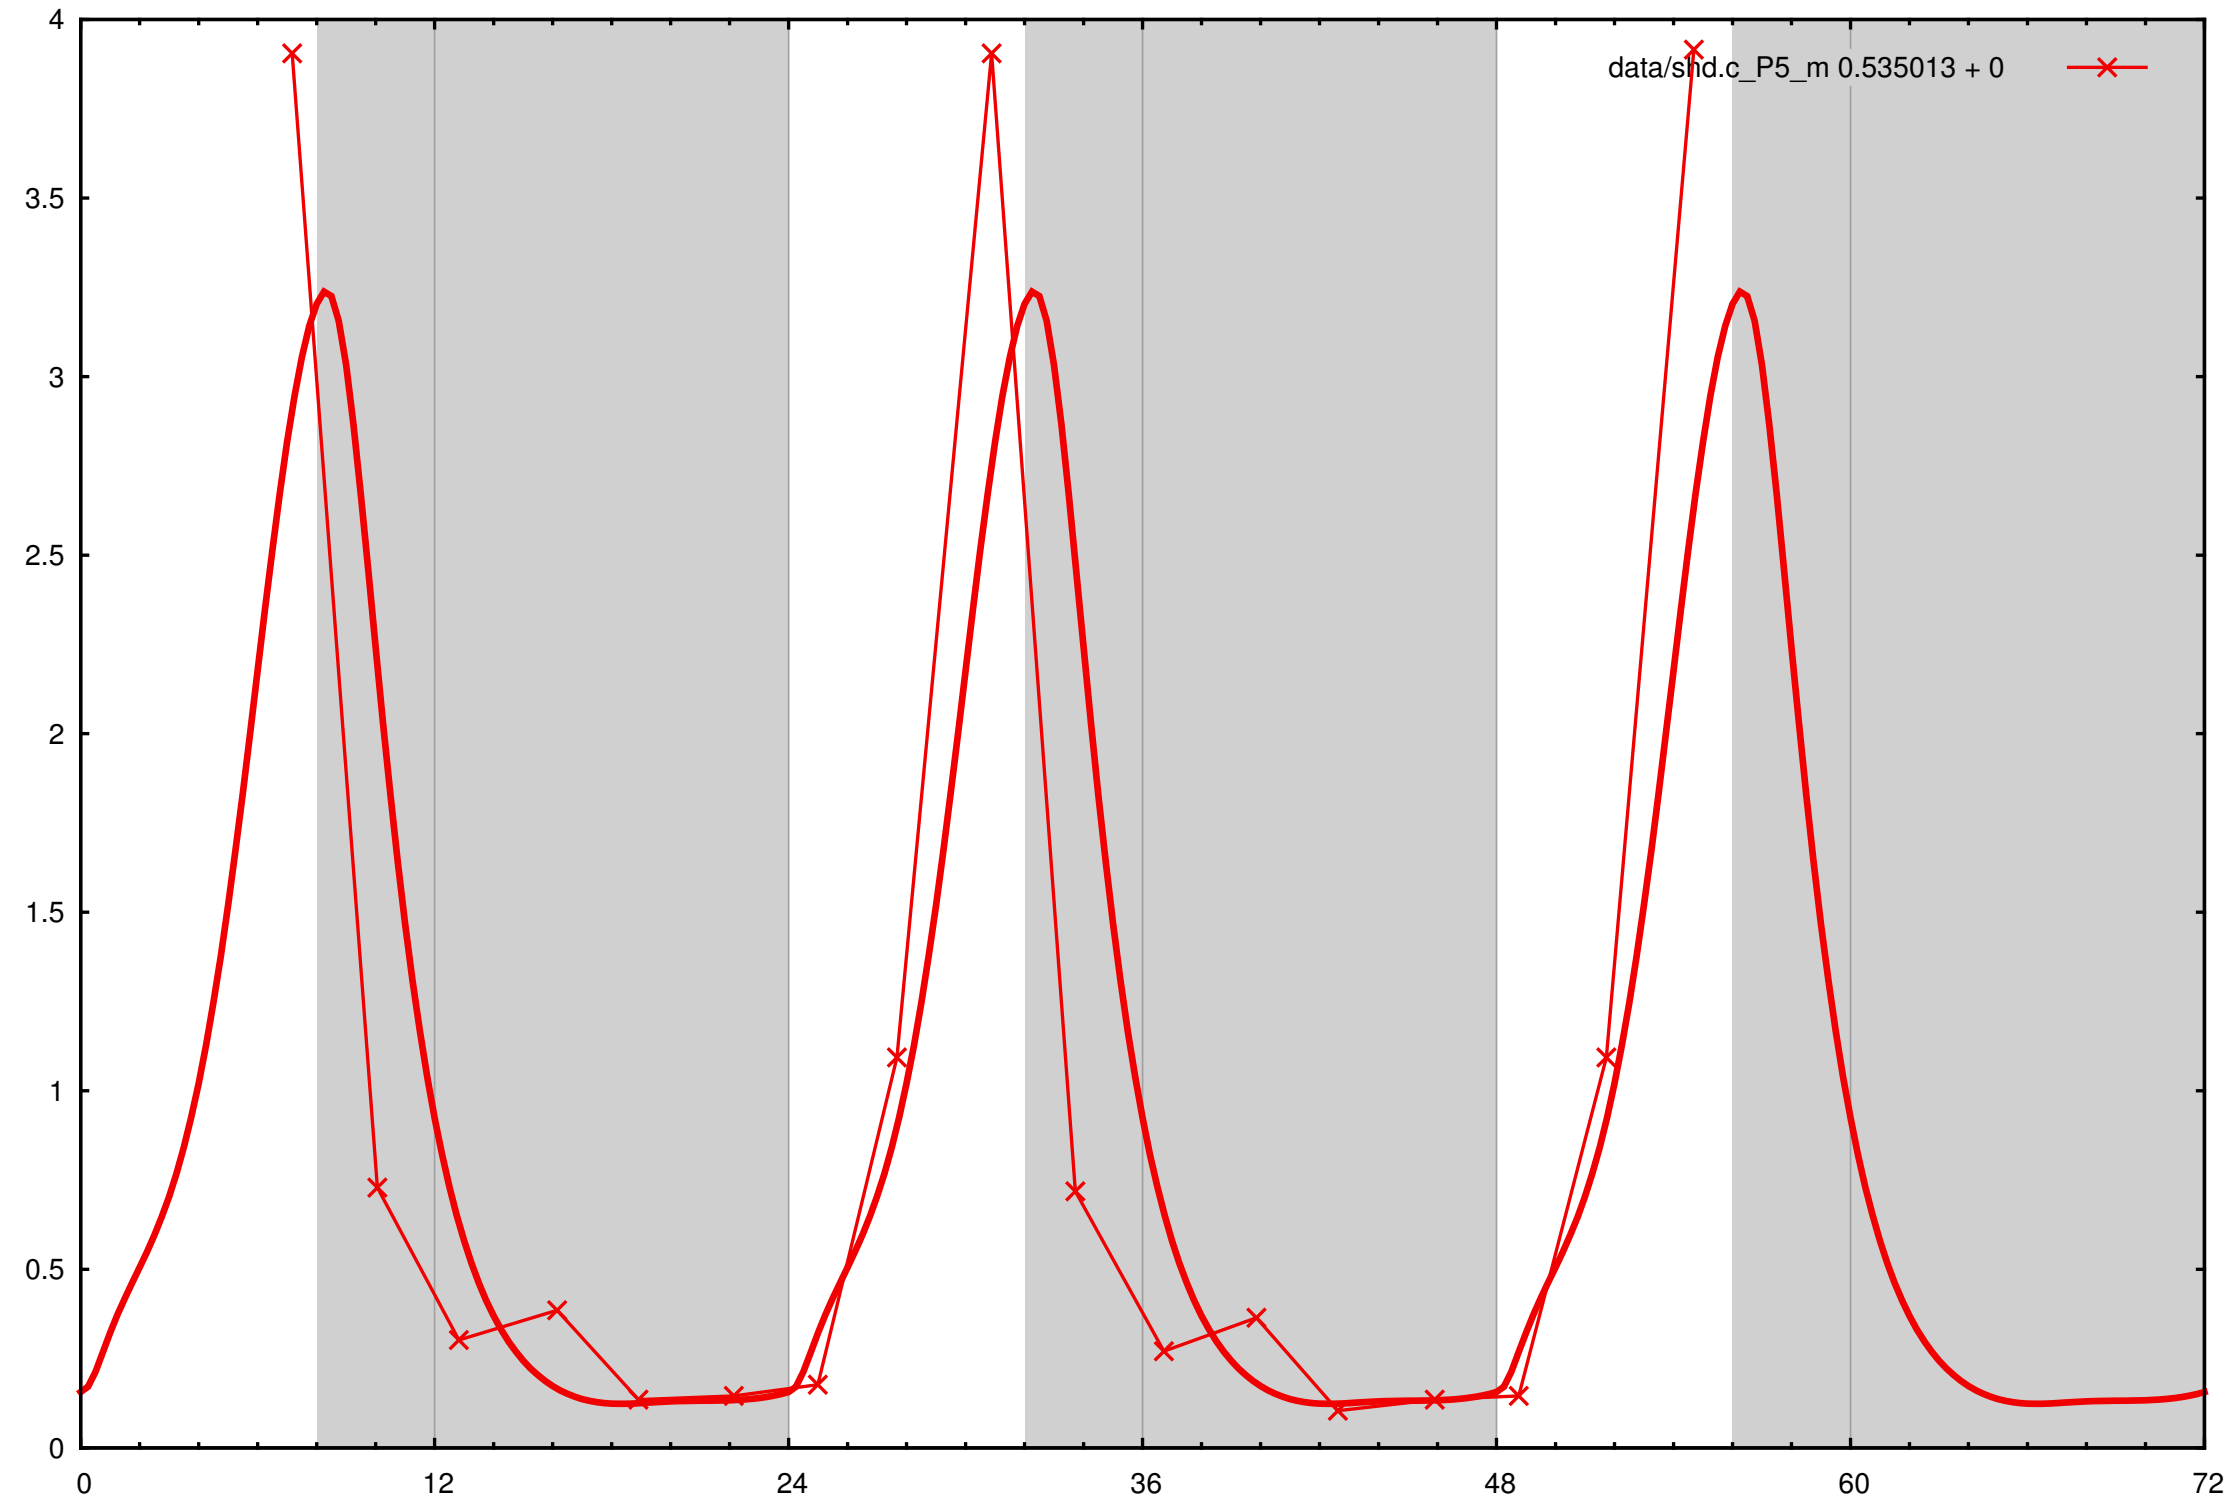

Scale group 343, scost 0

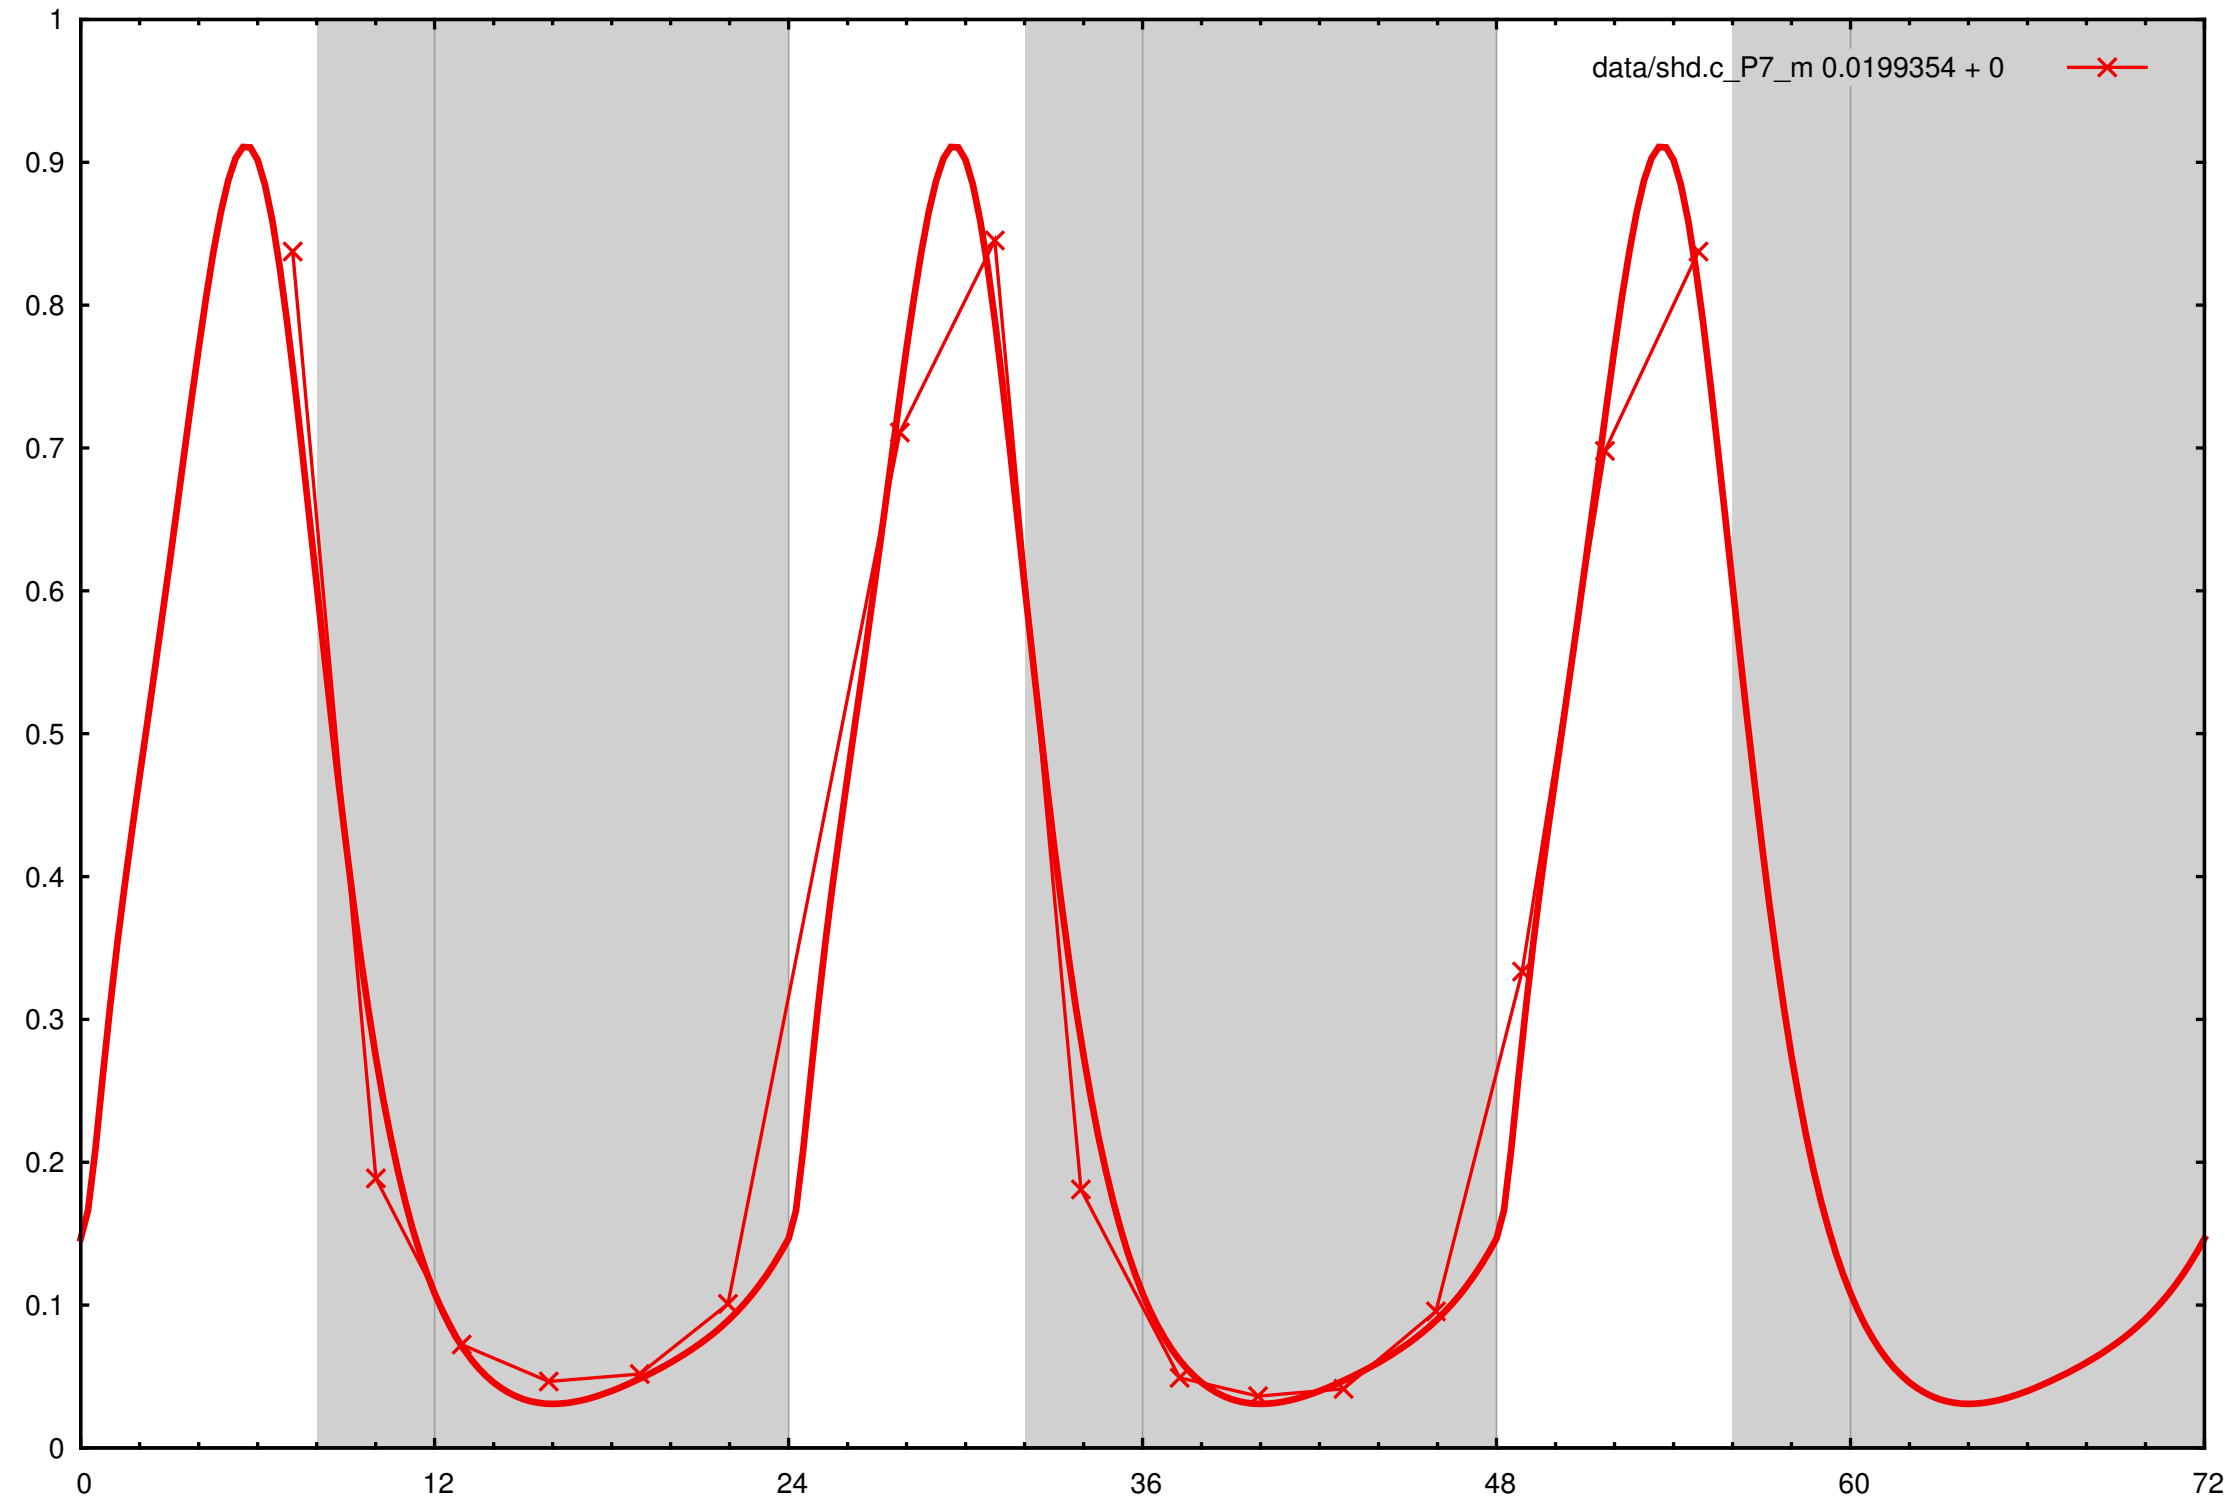

Scale group 344, scost 0

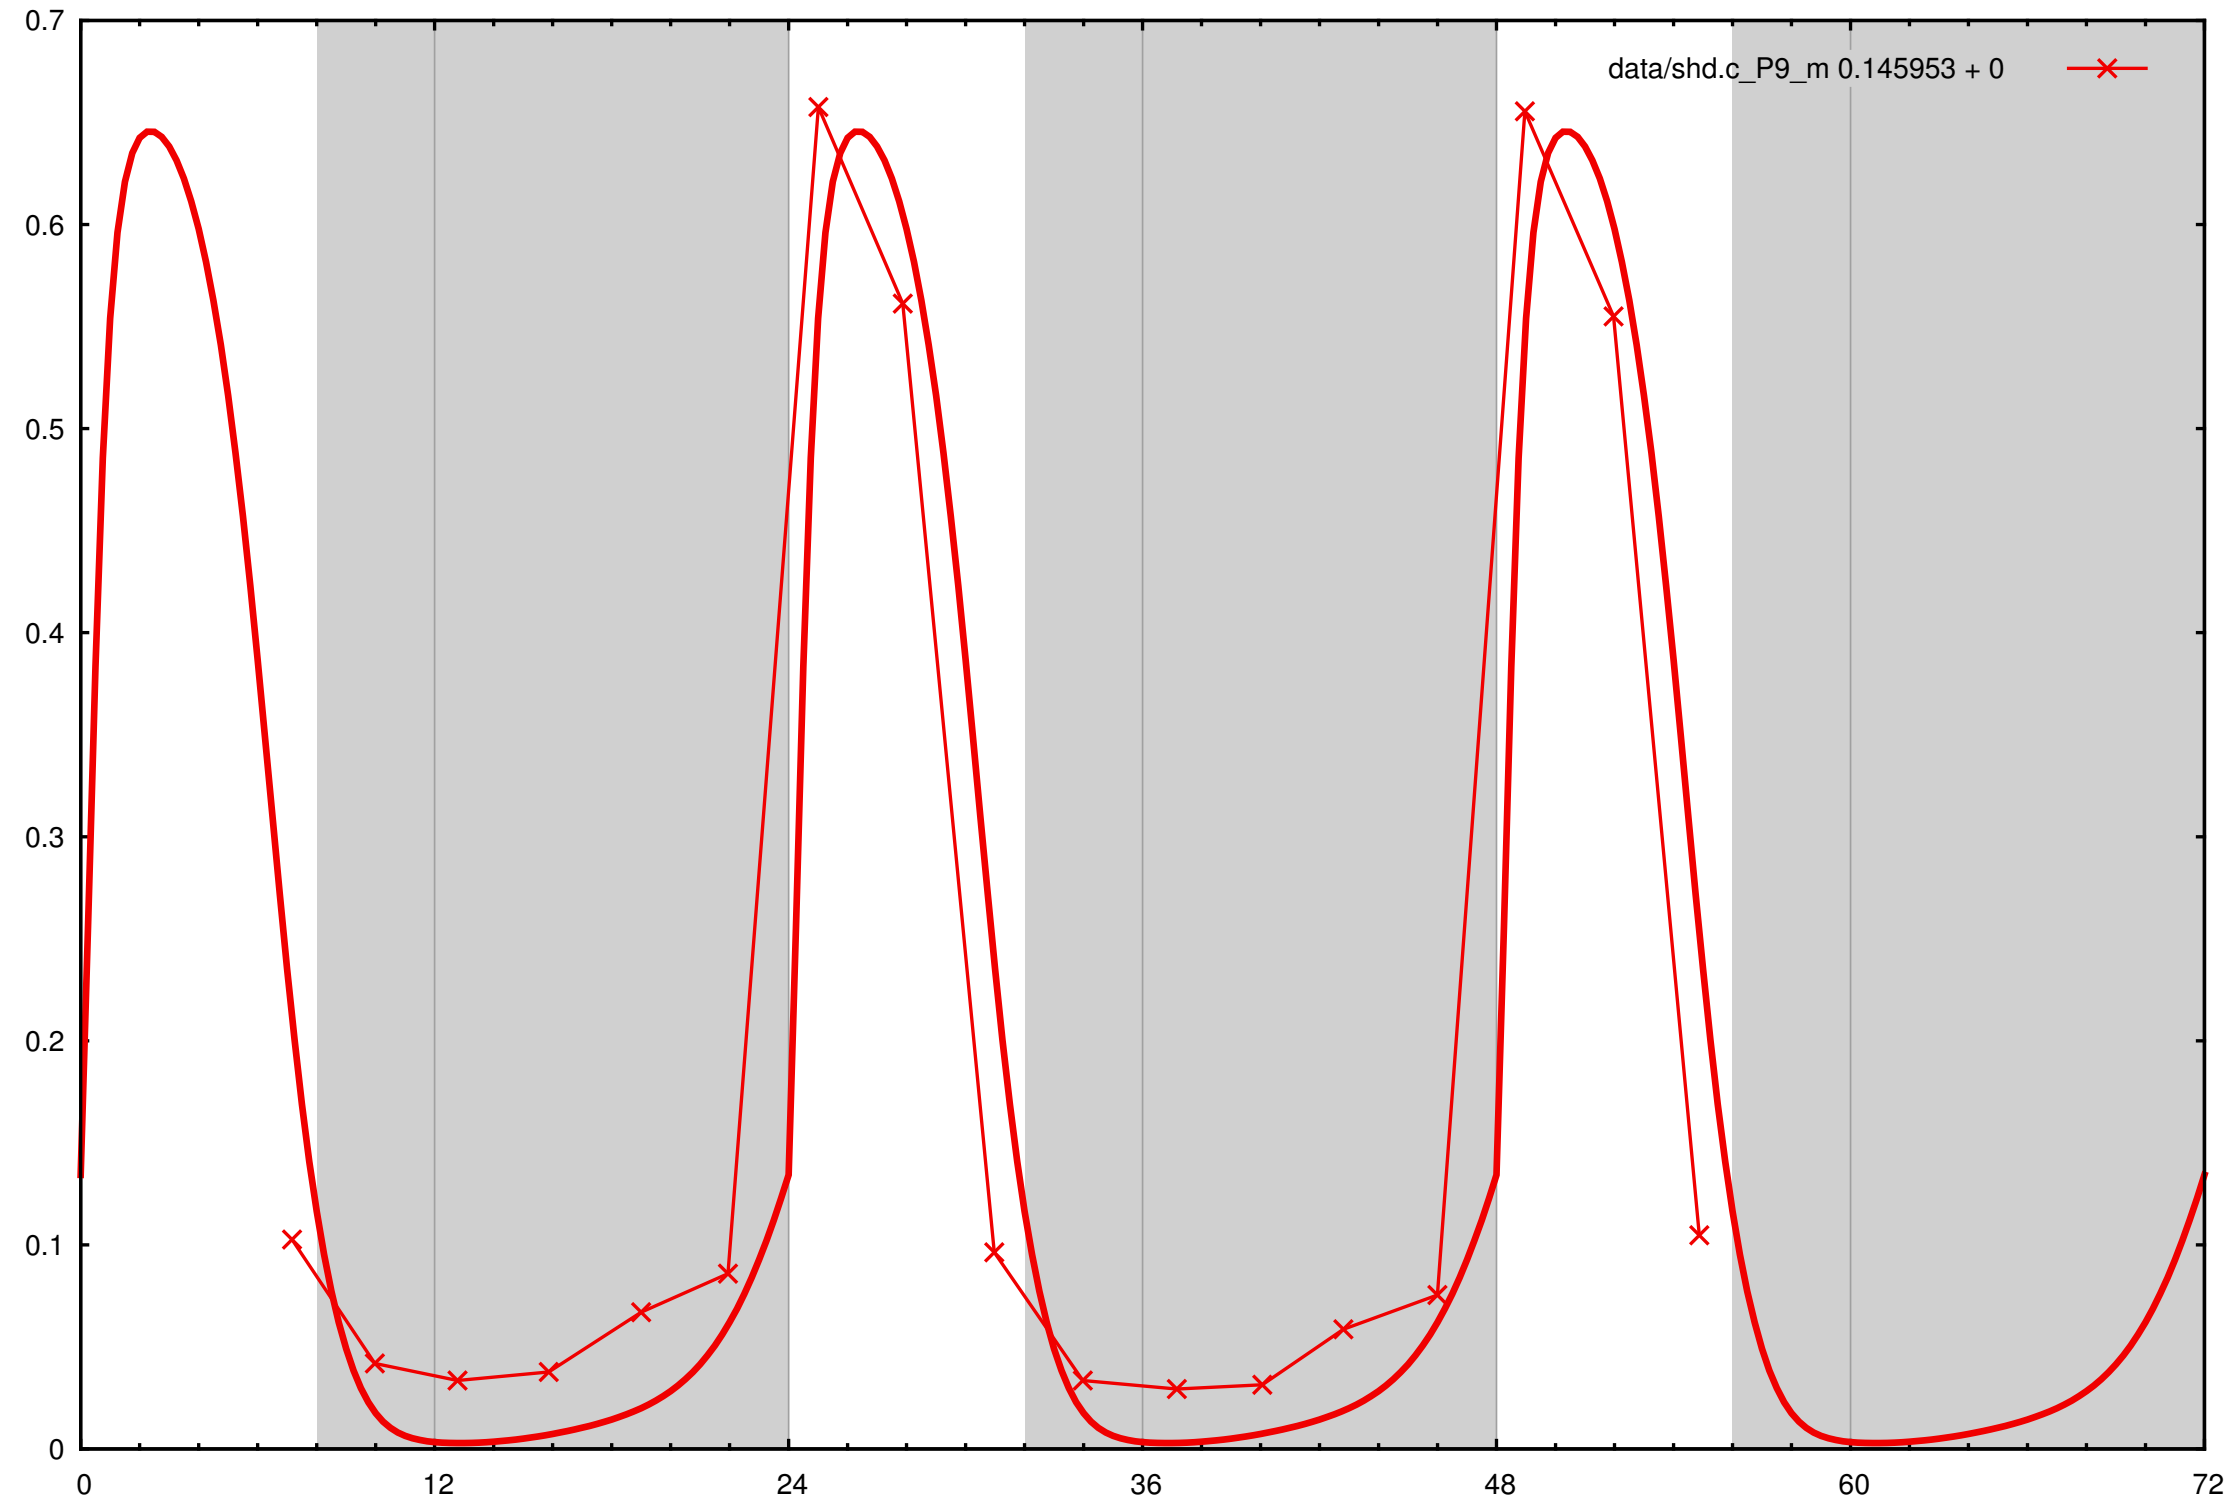



Scale group 345, scost 0

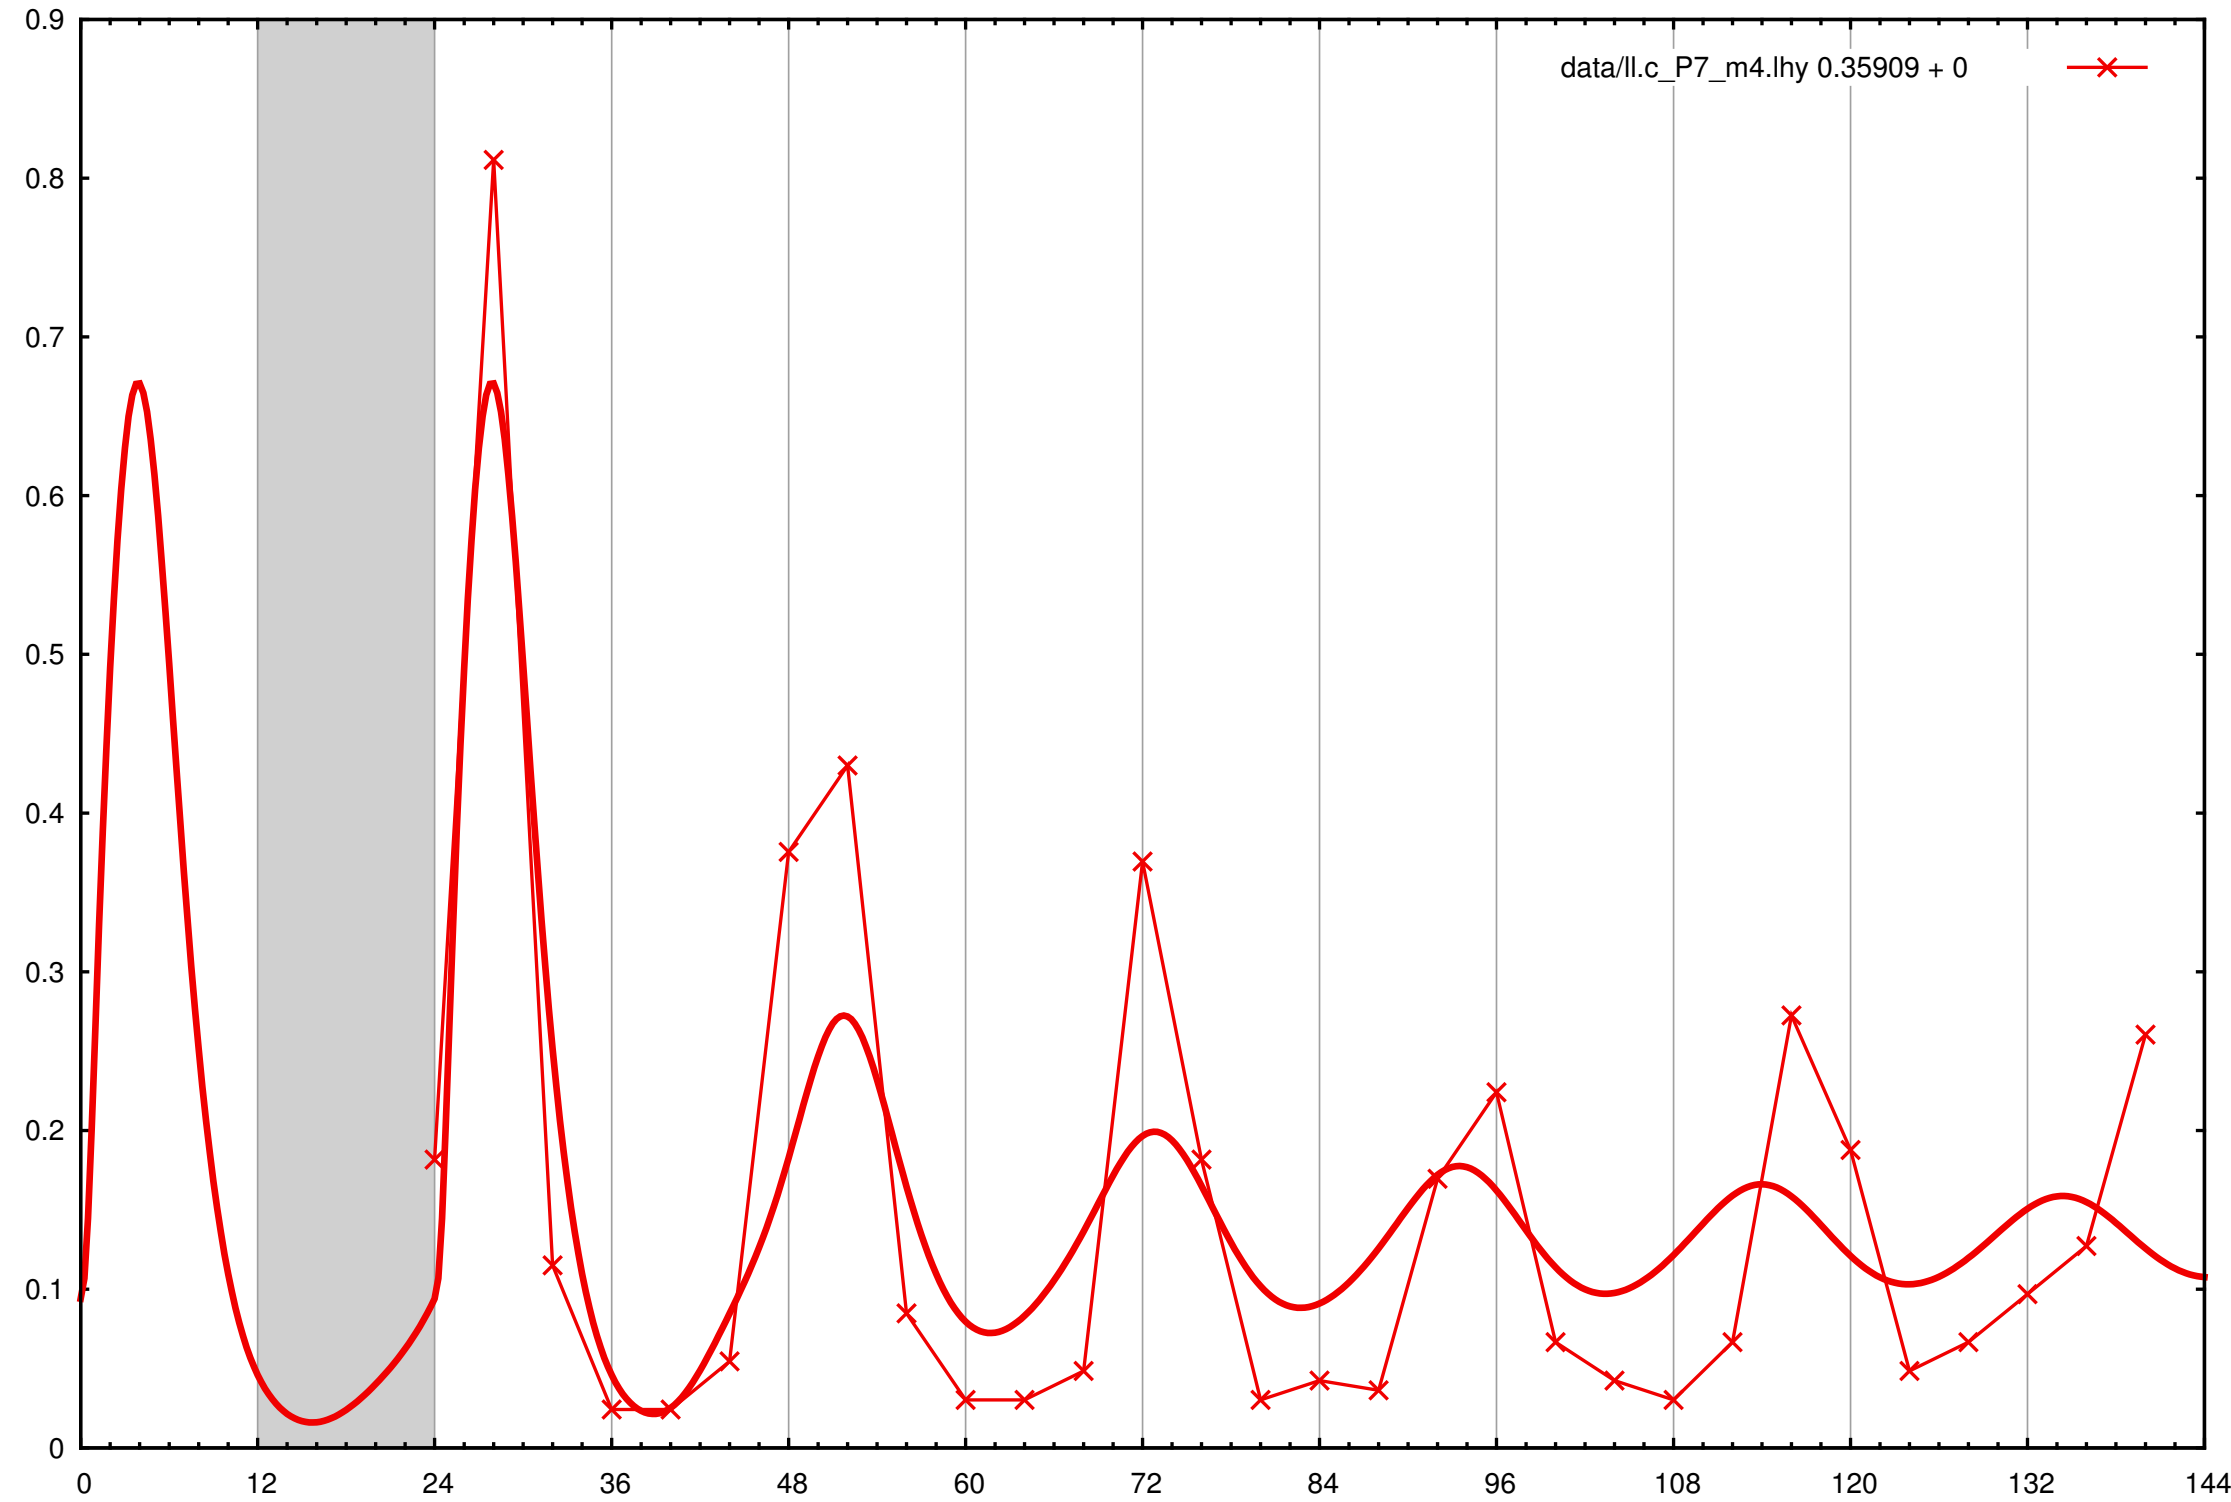

Scale group 346, scost 0

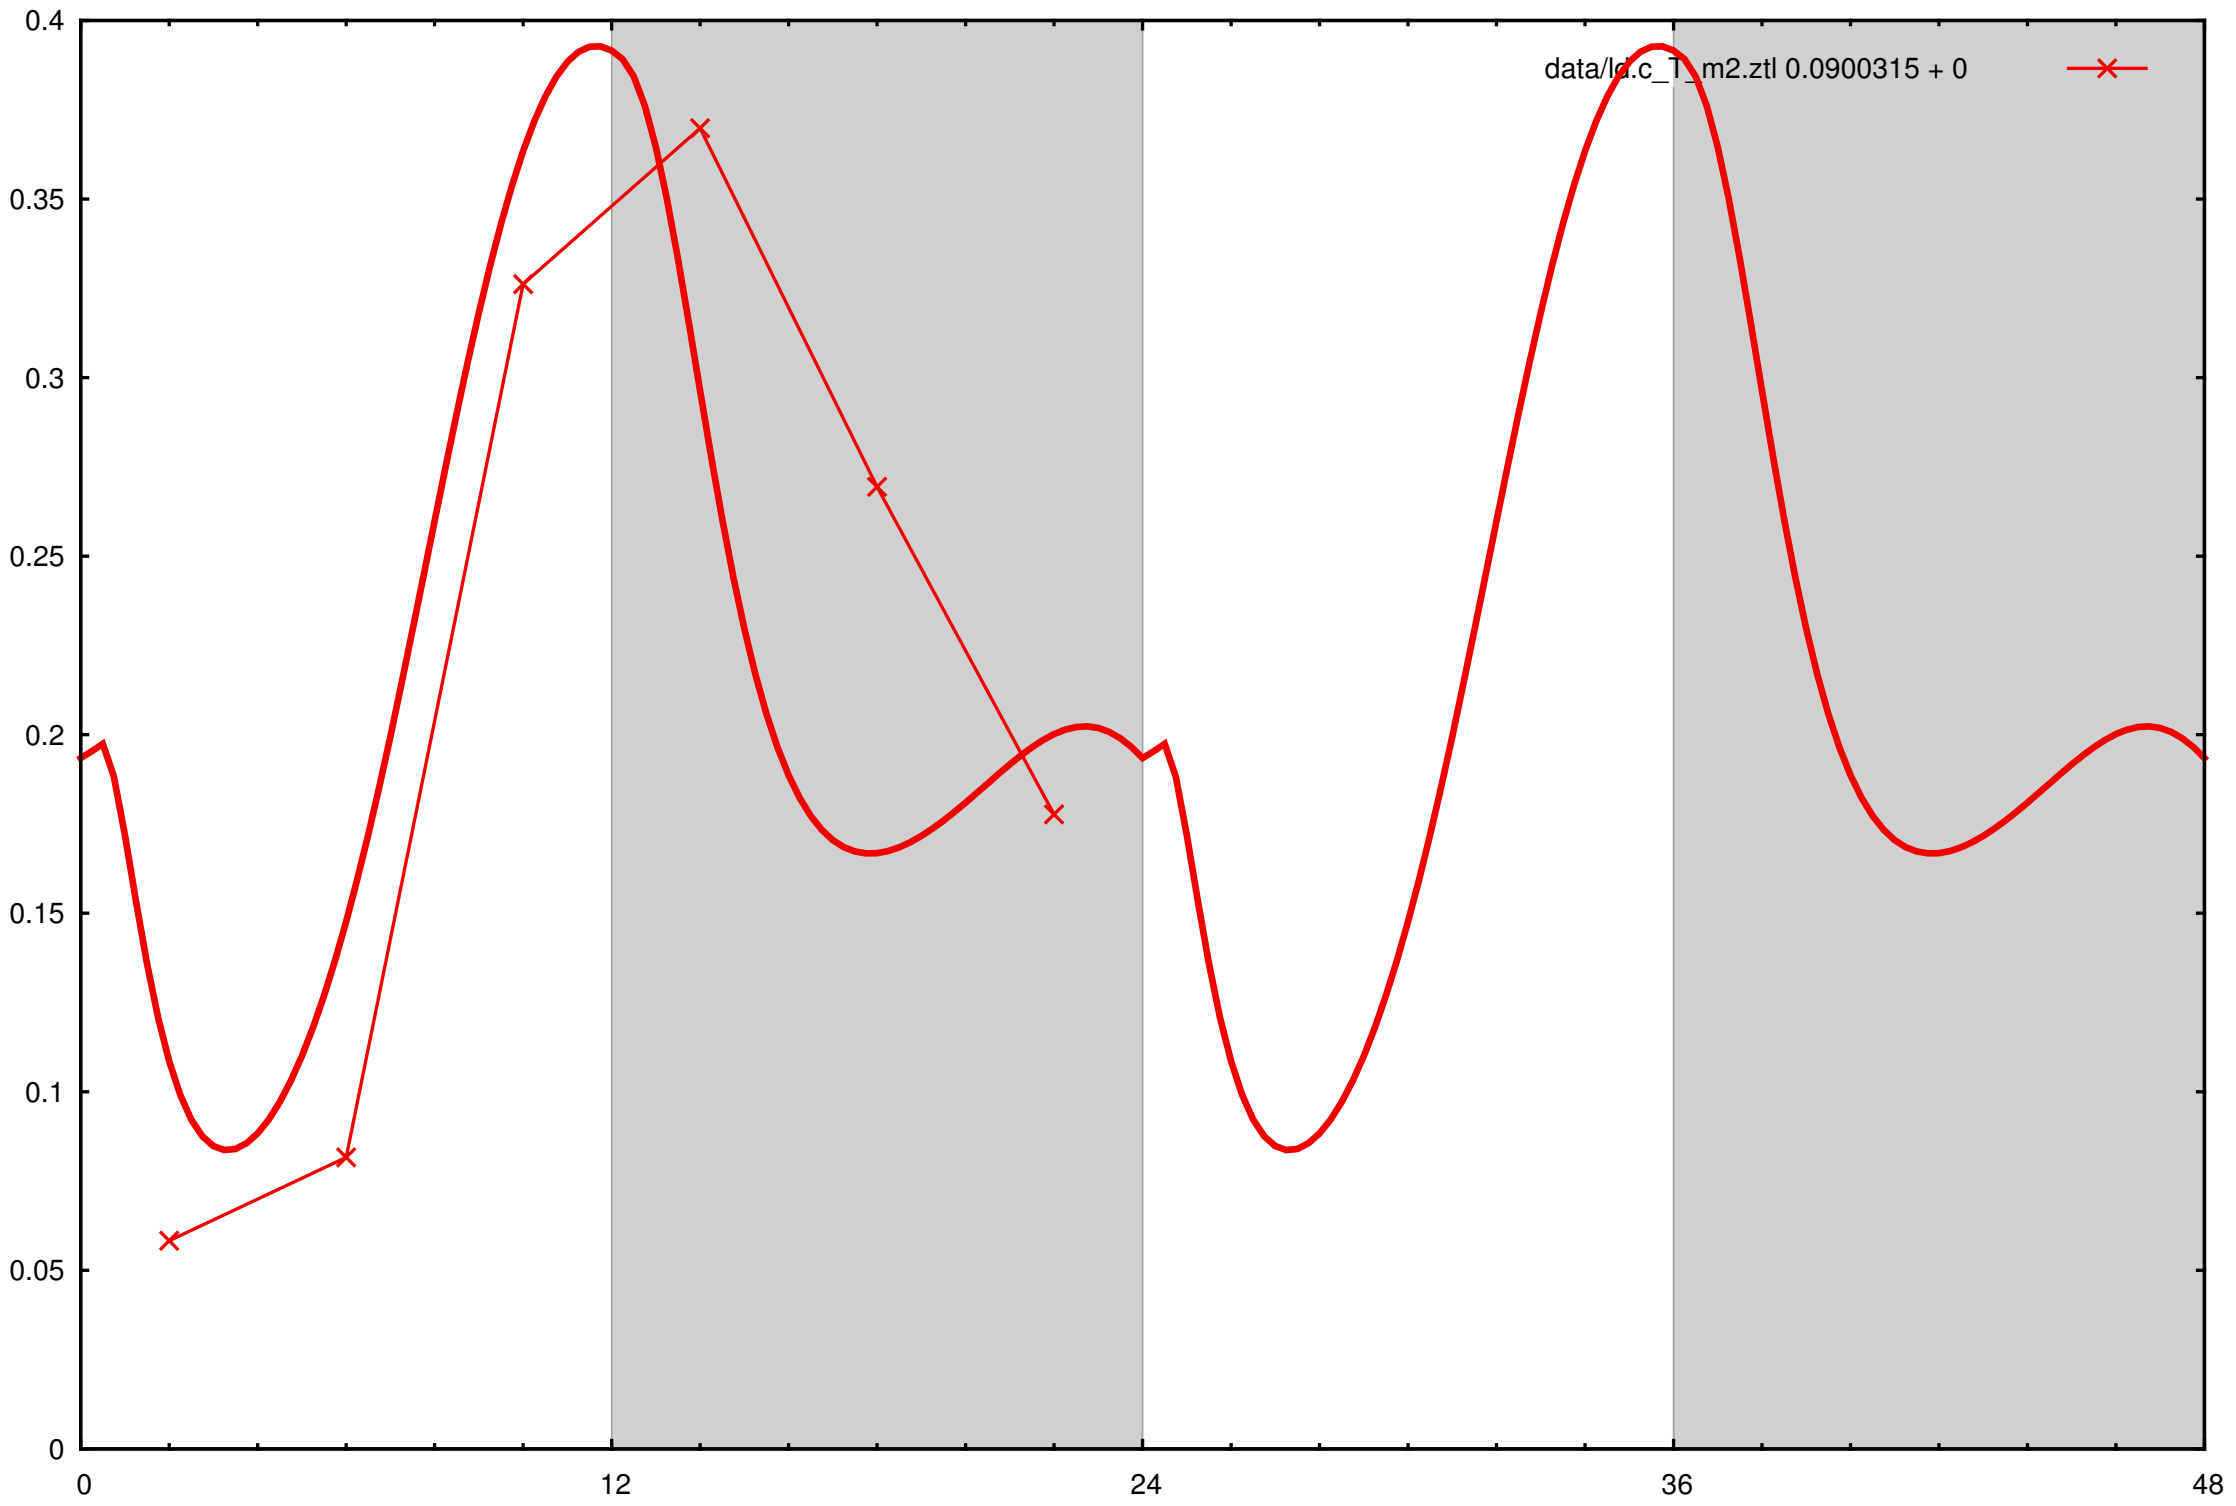

Scale group 347, scost 0

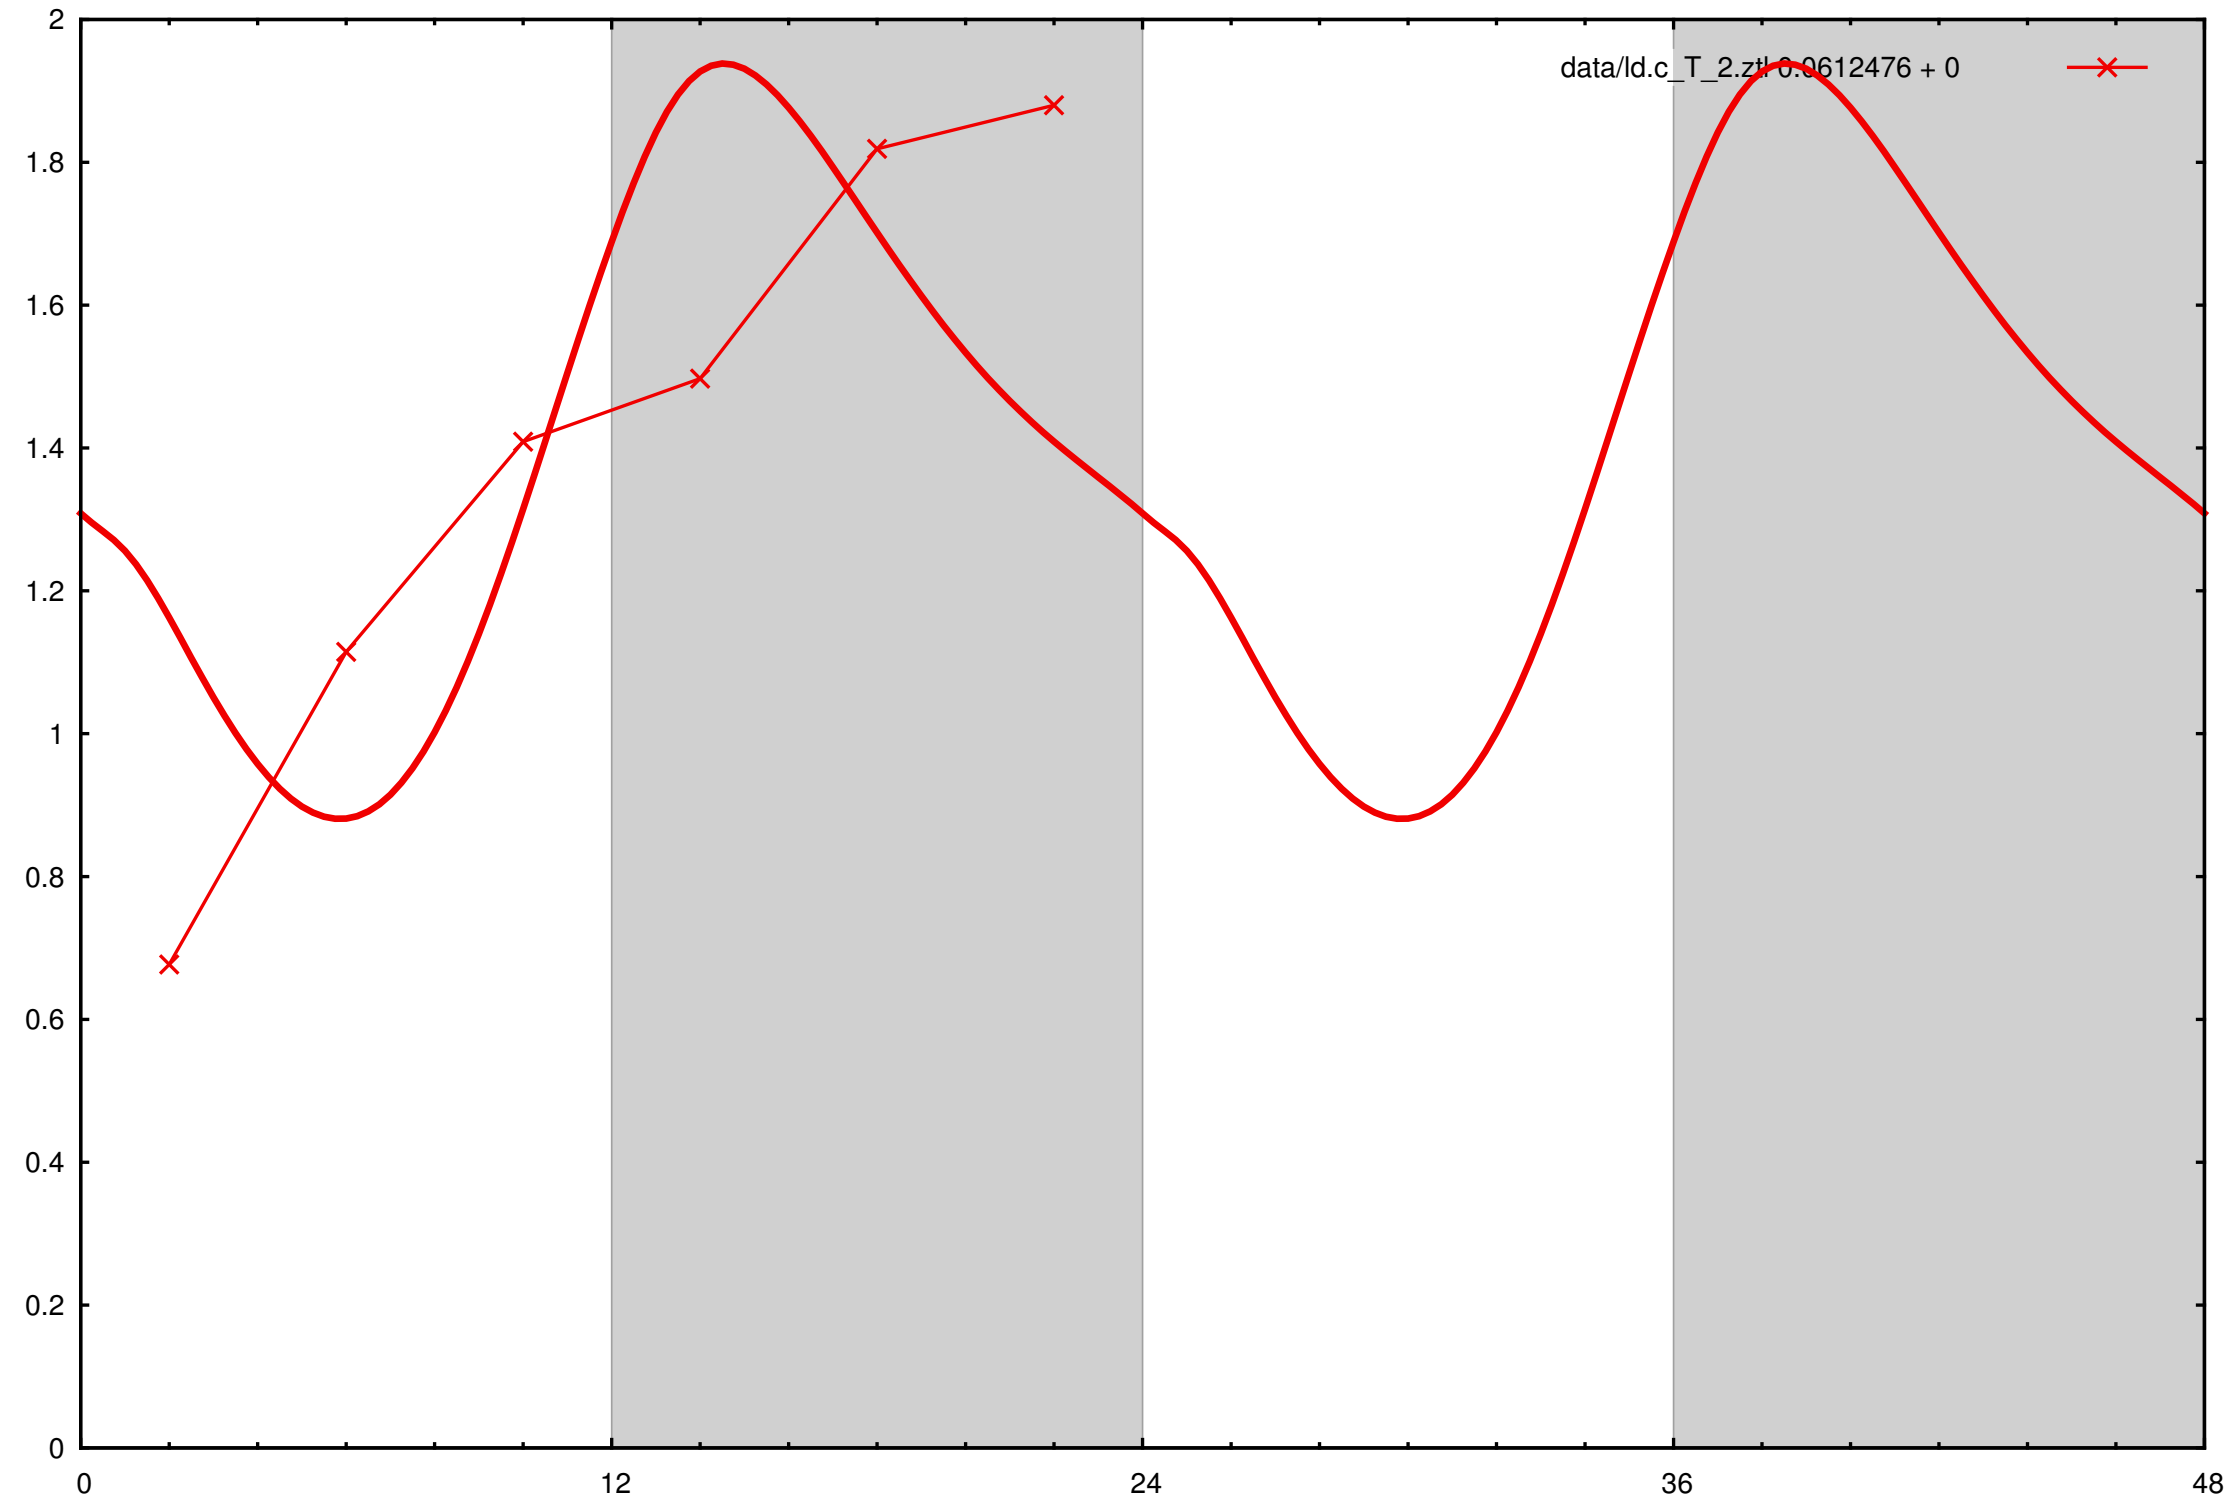

Scale group 348, scost 0

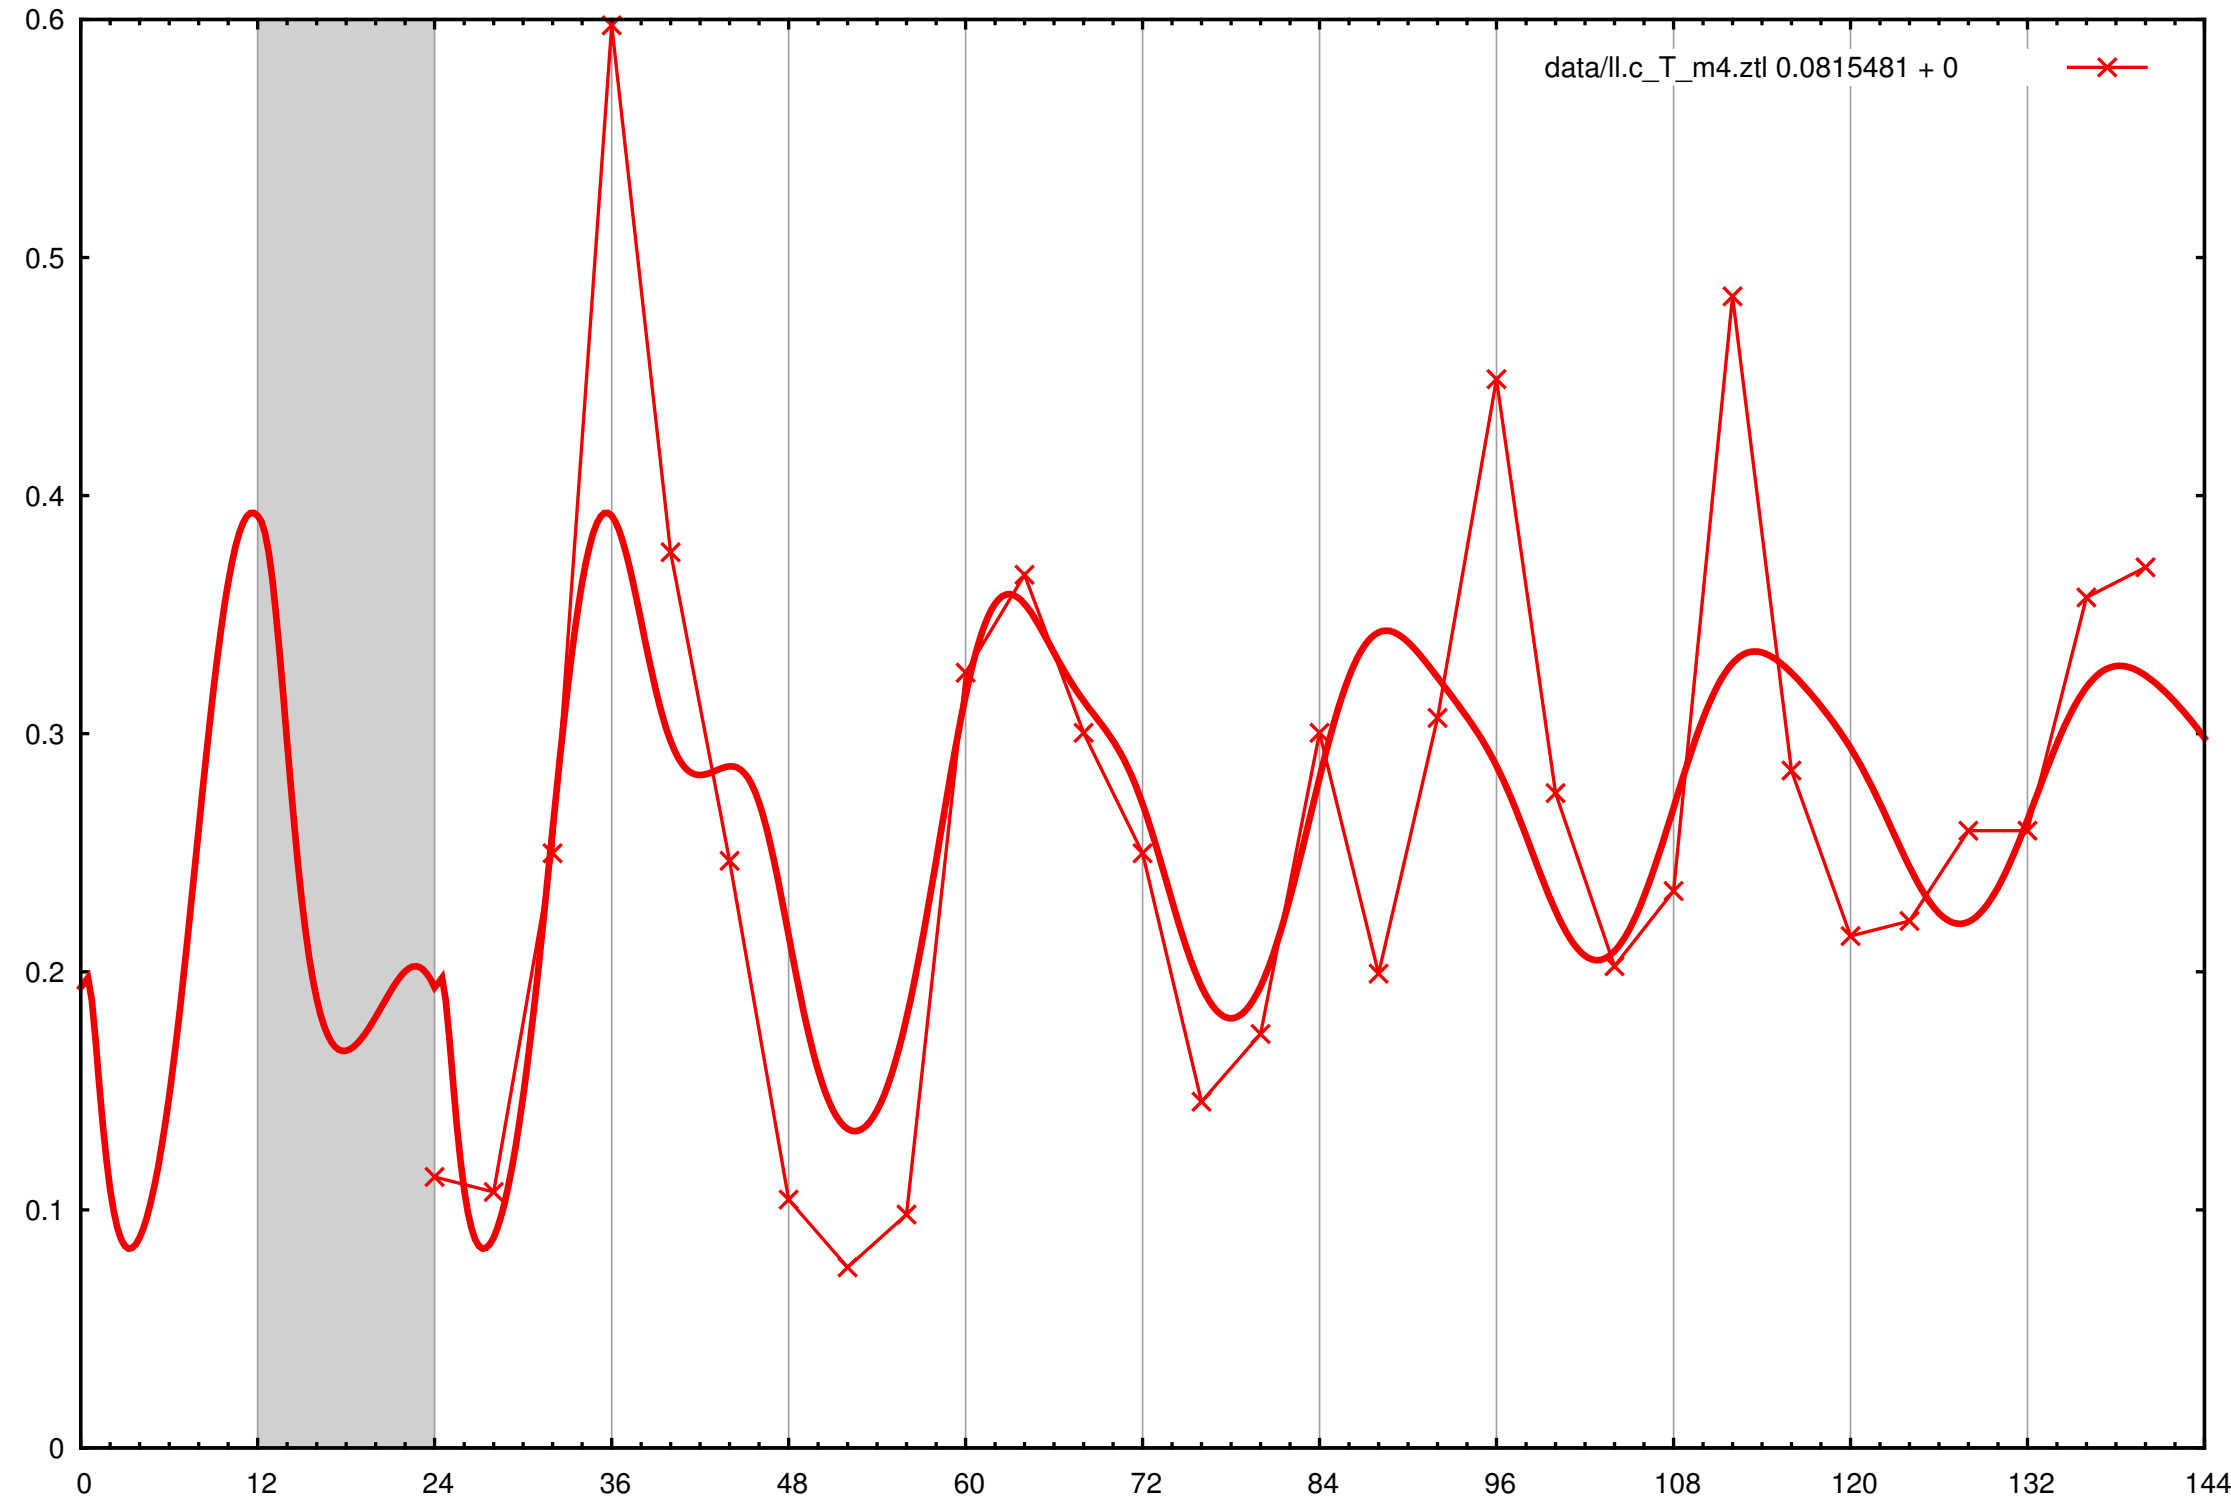

Scale group 349, scost 0

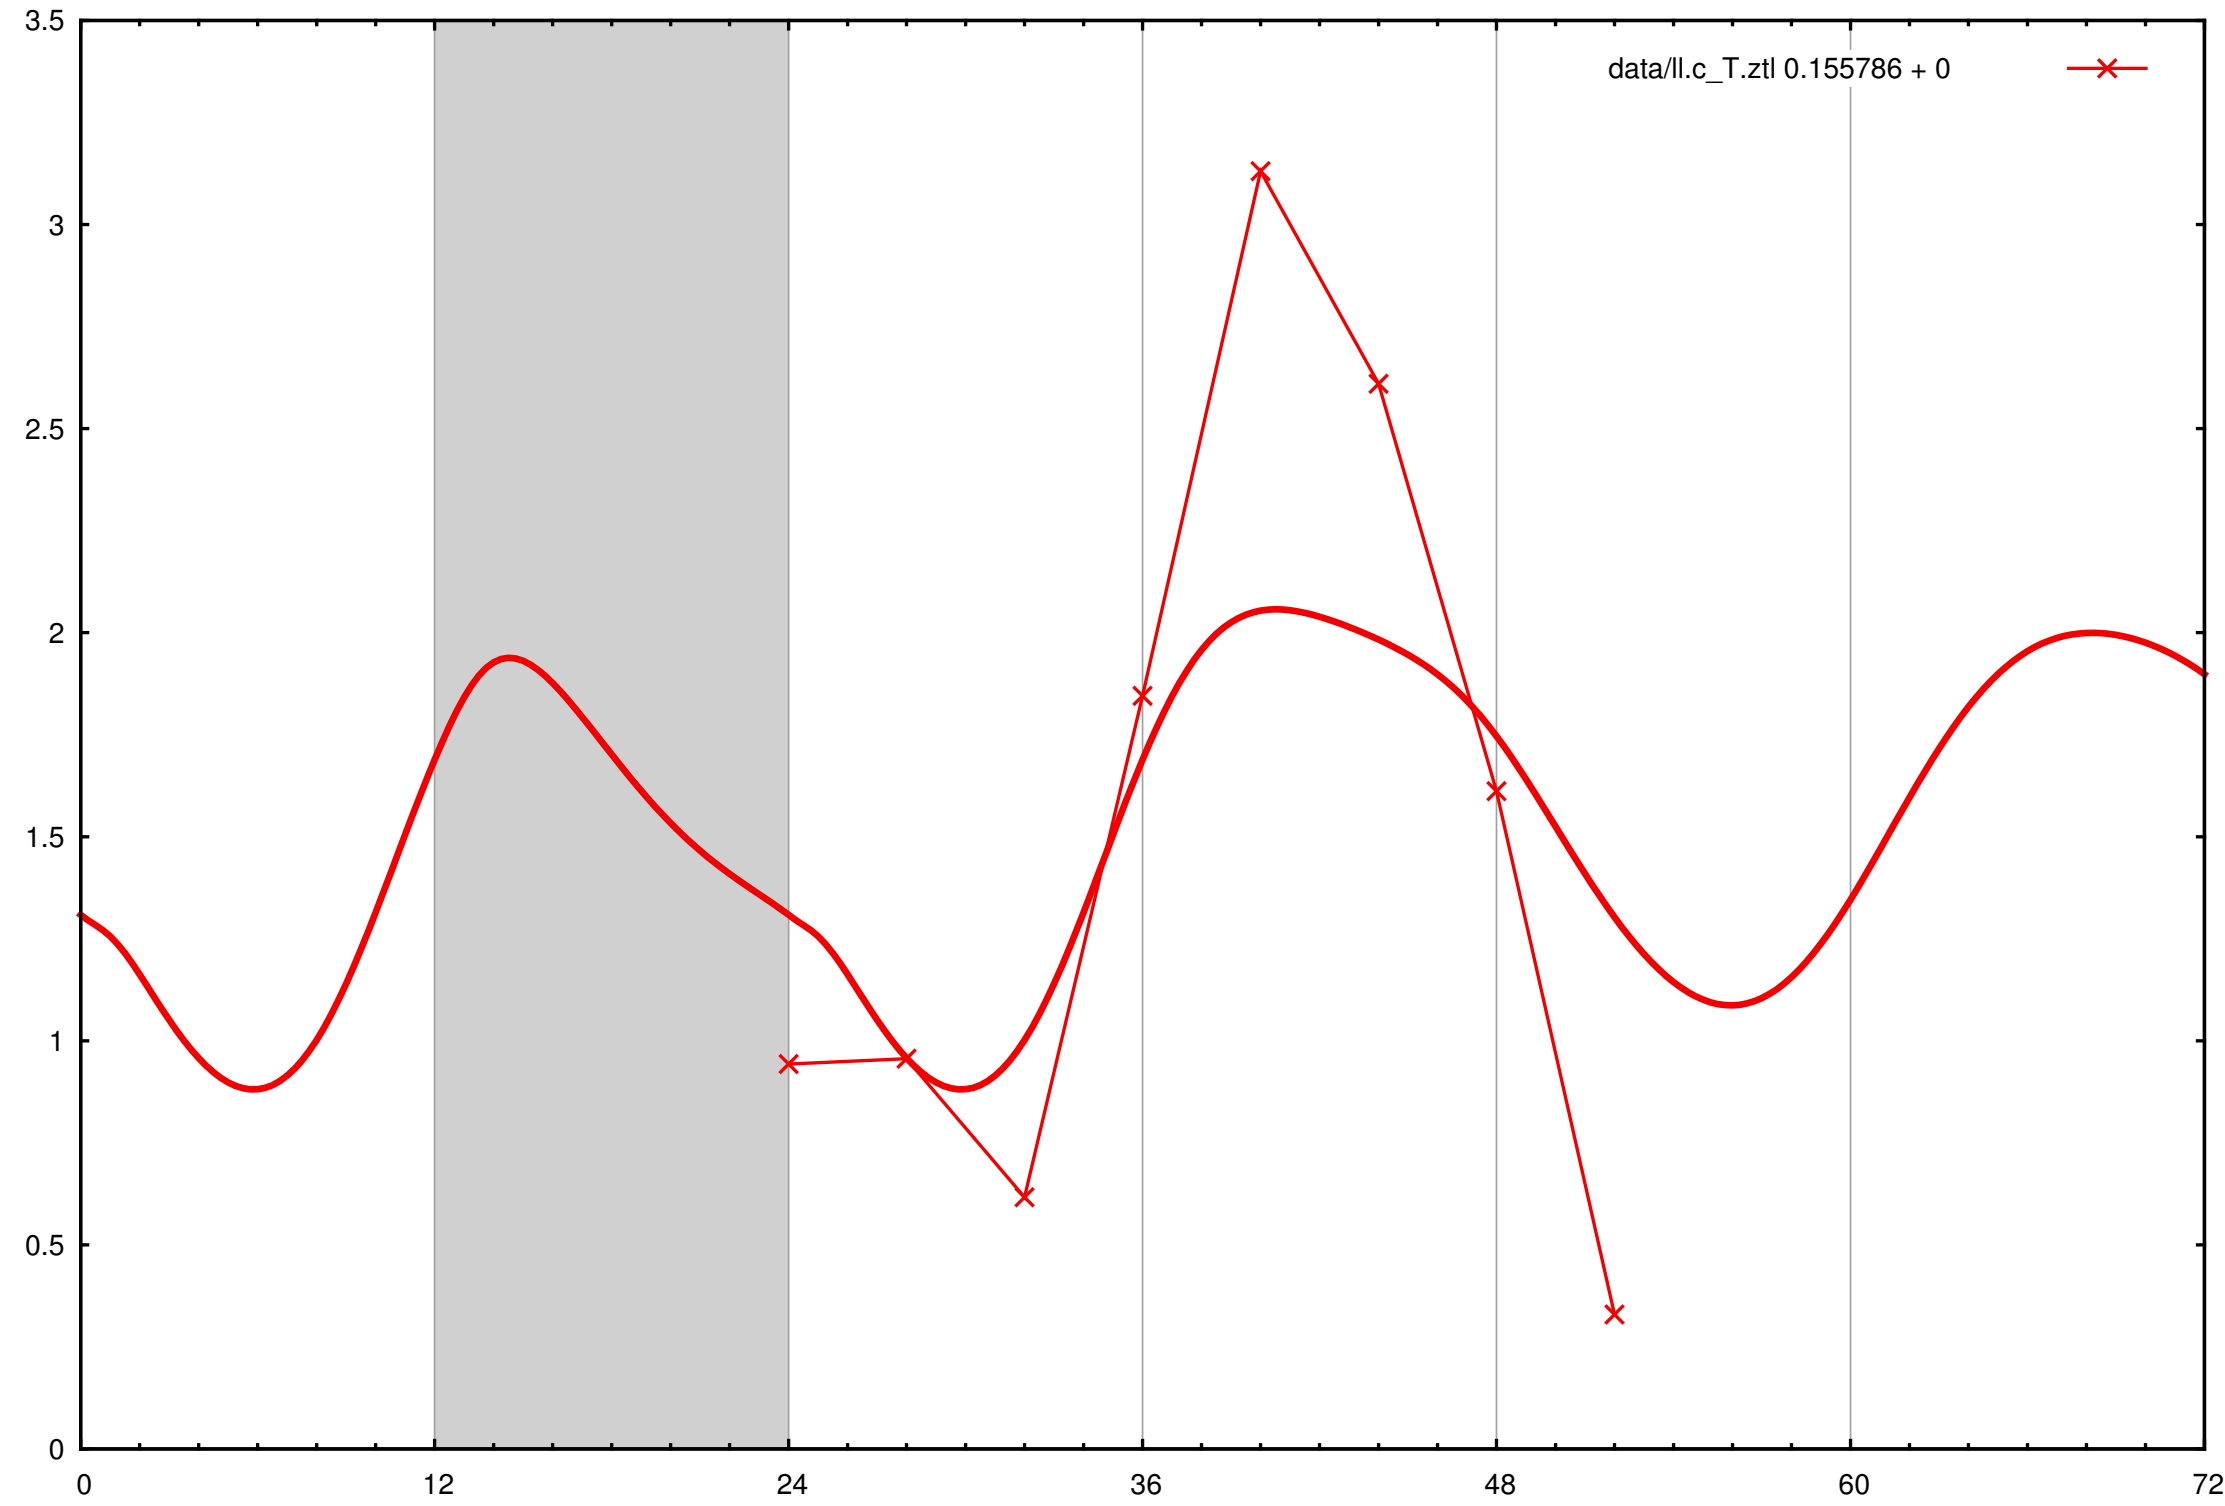

Scale group 350, scost 0

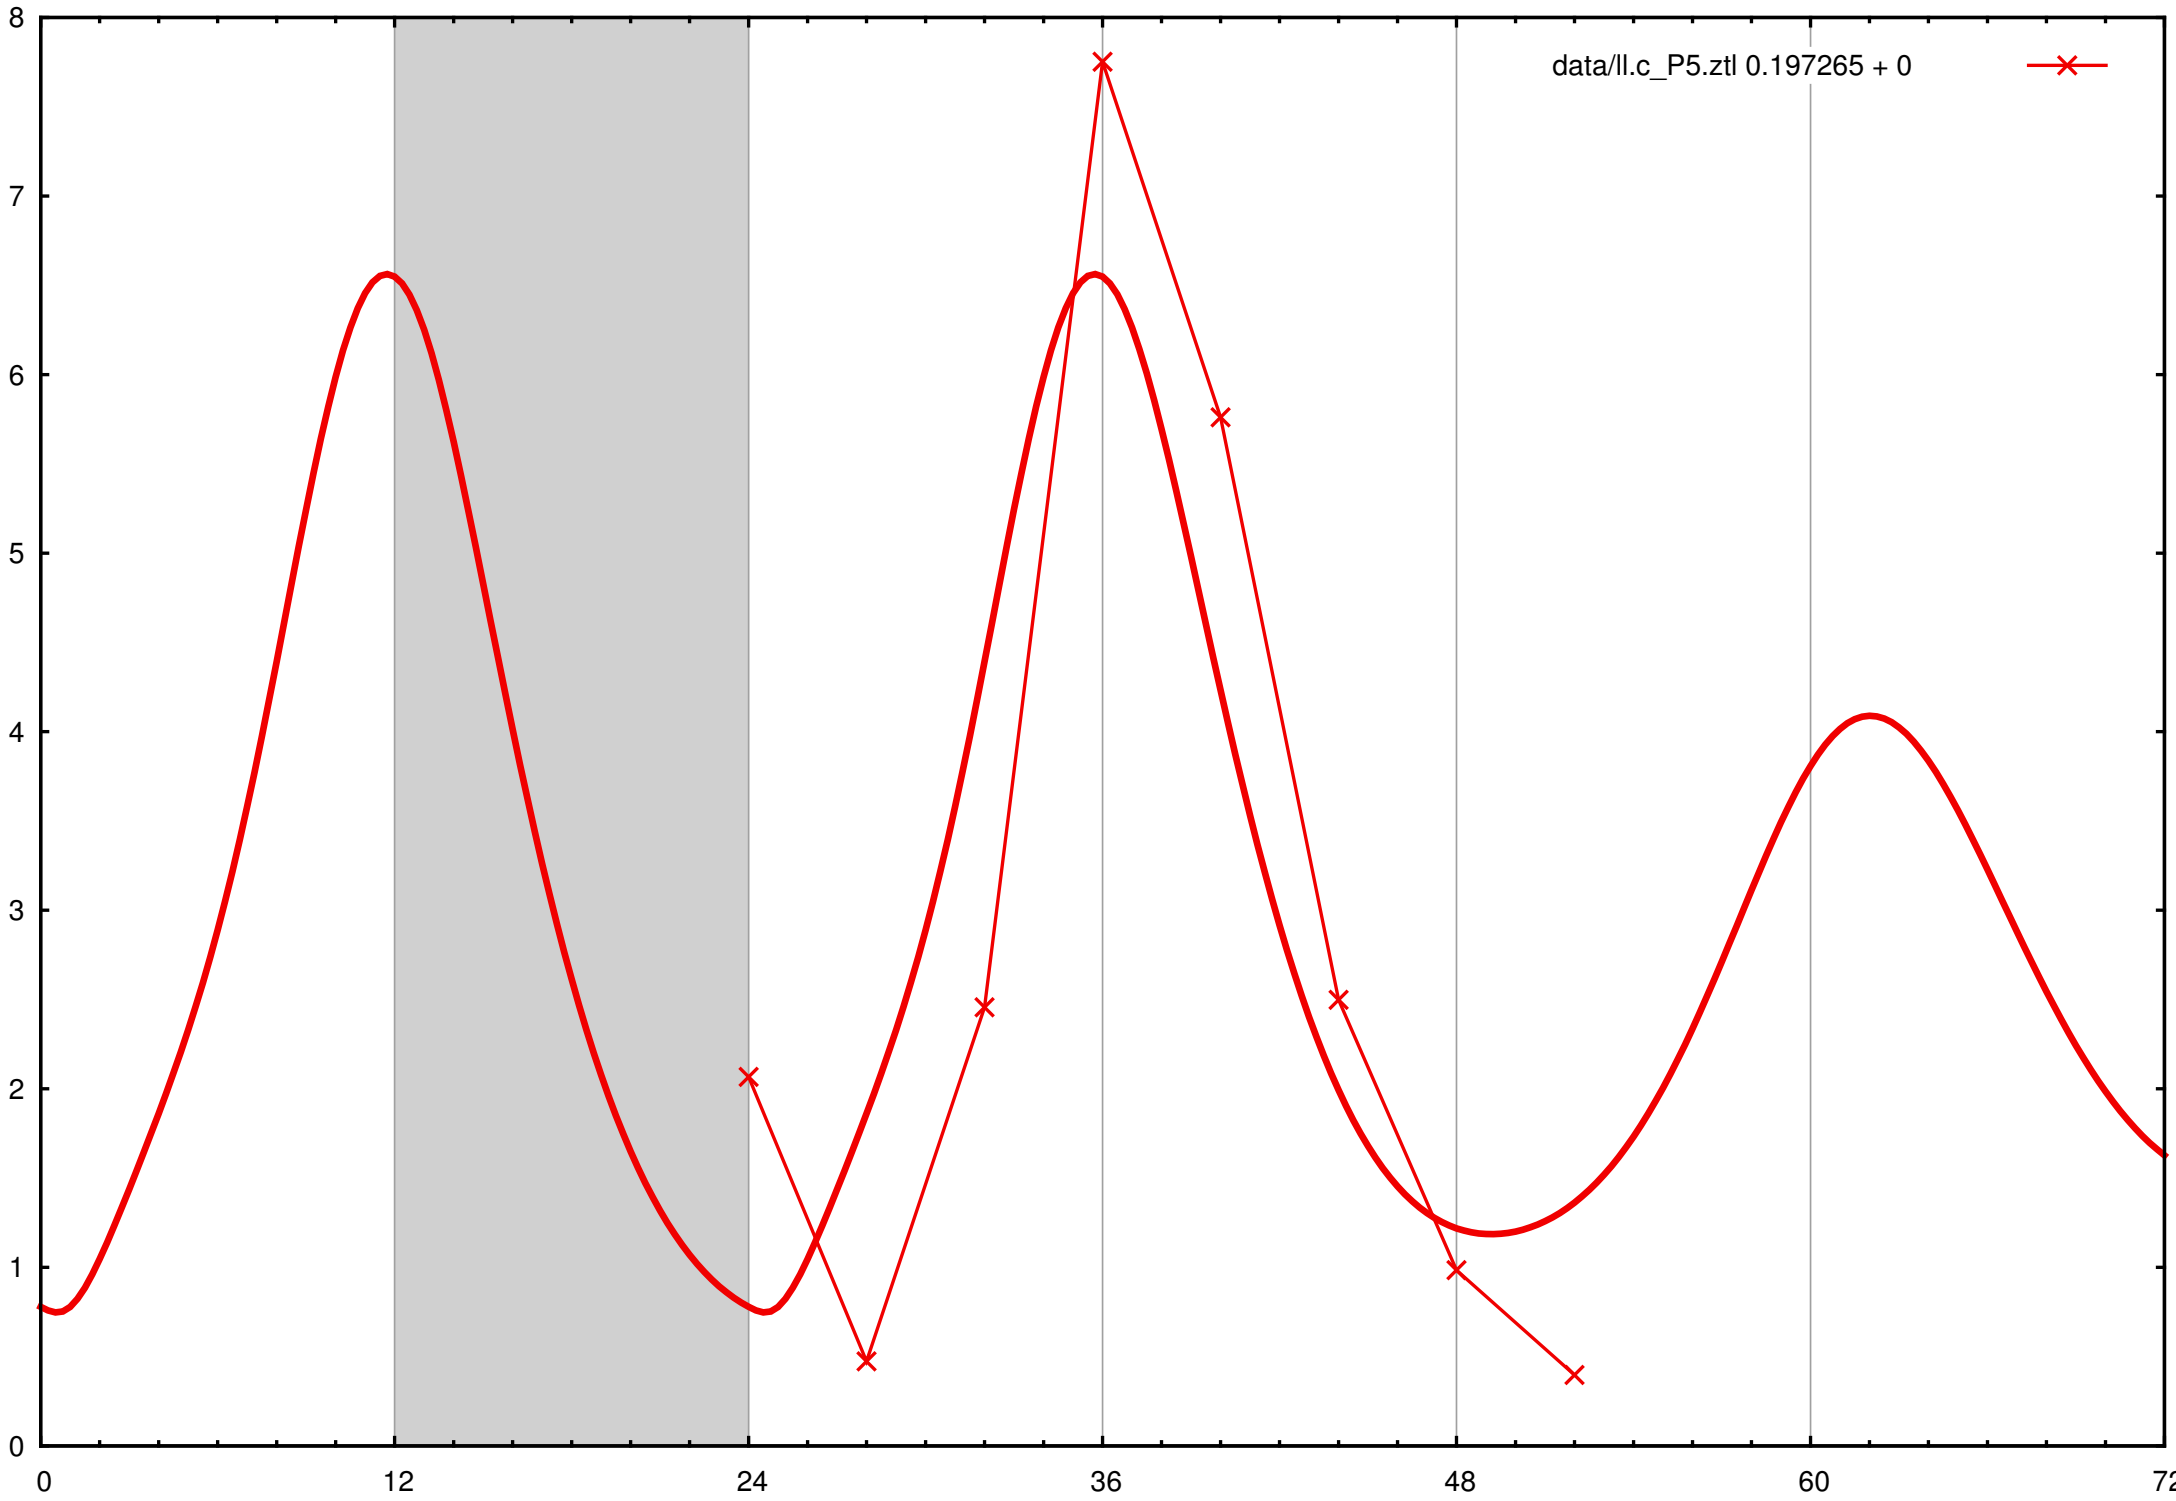

Scale group 351, scost 0

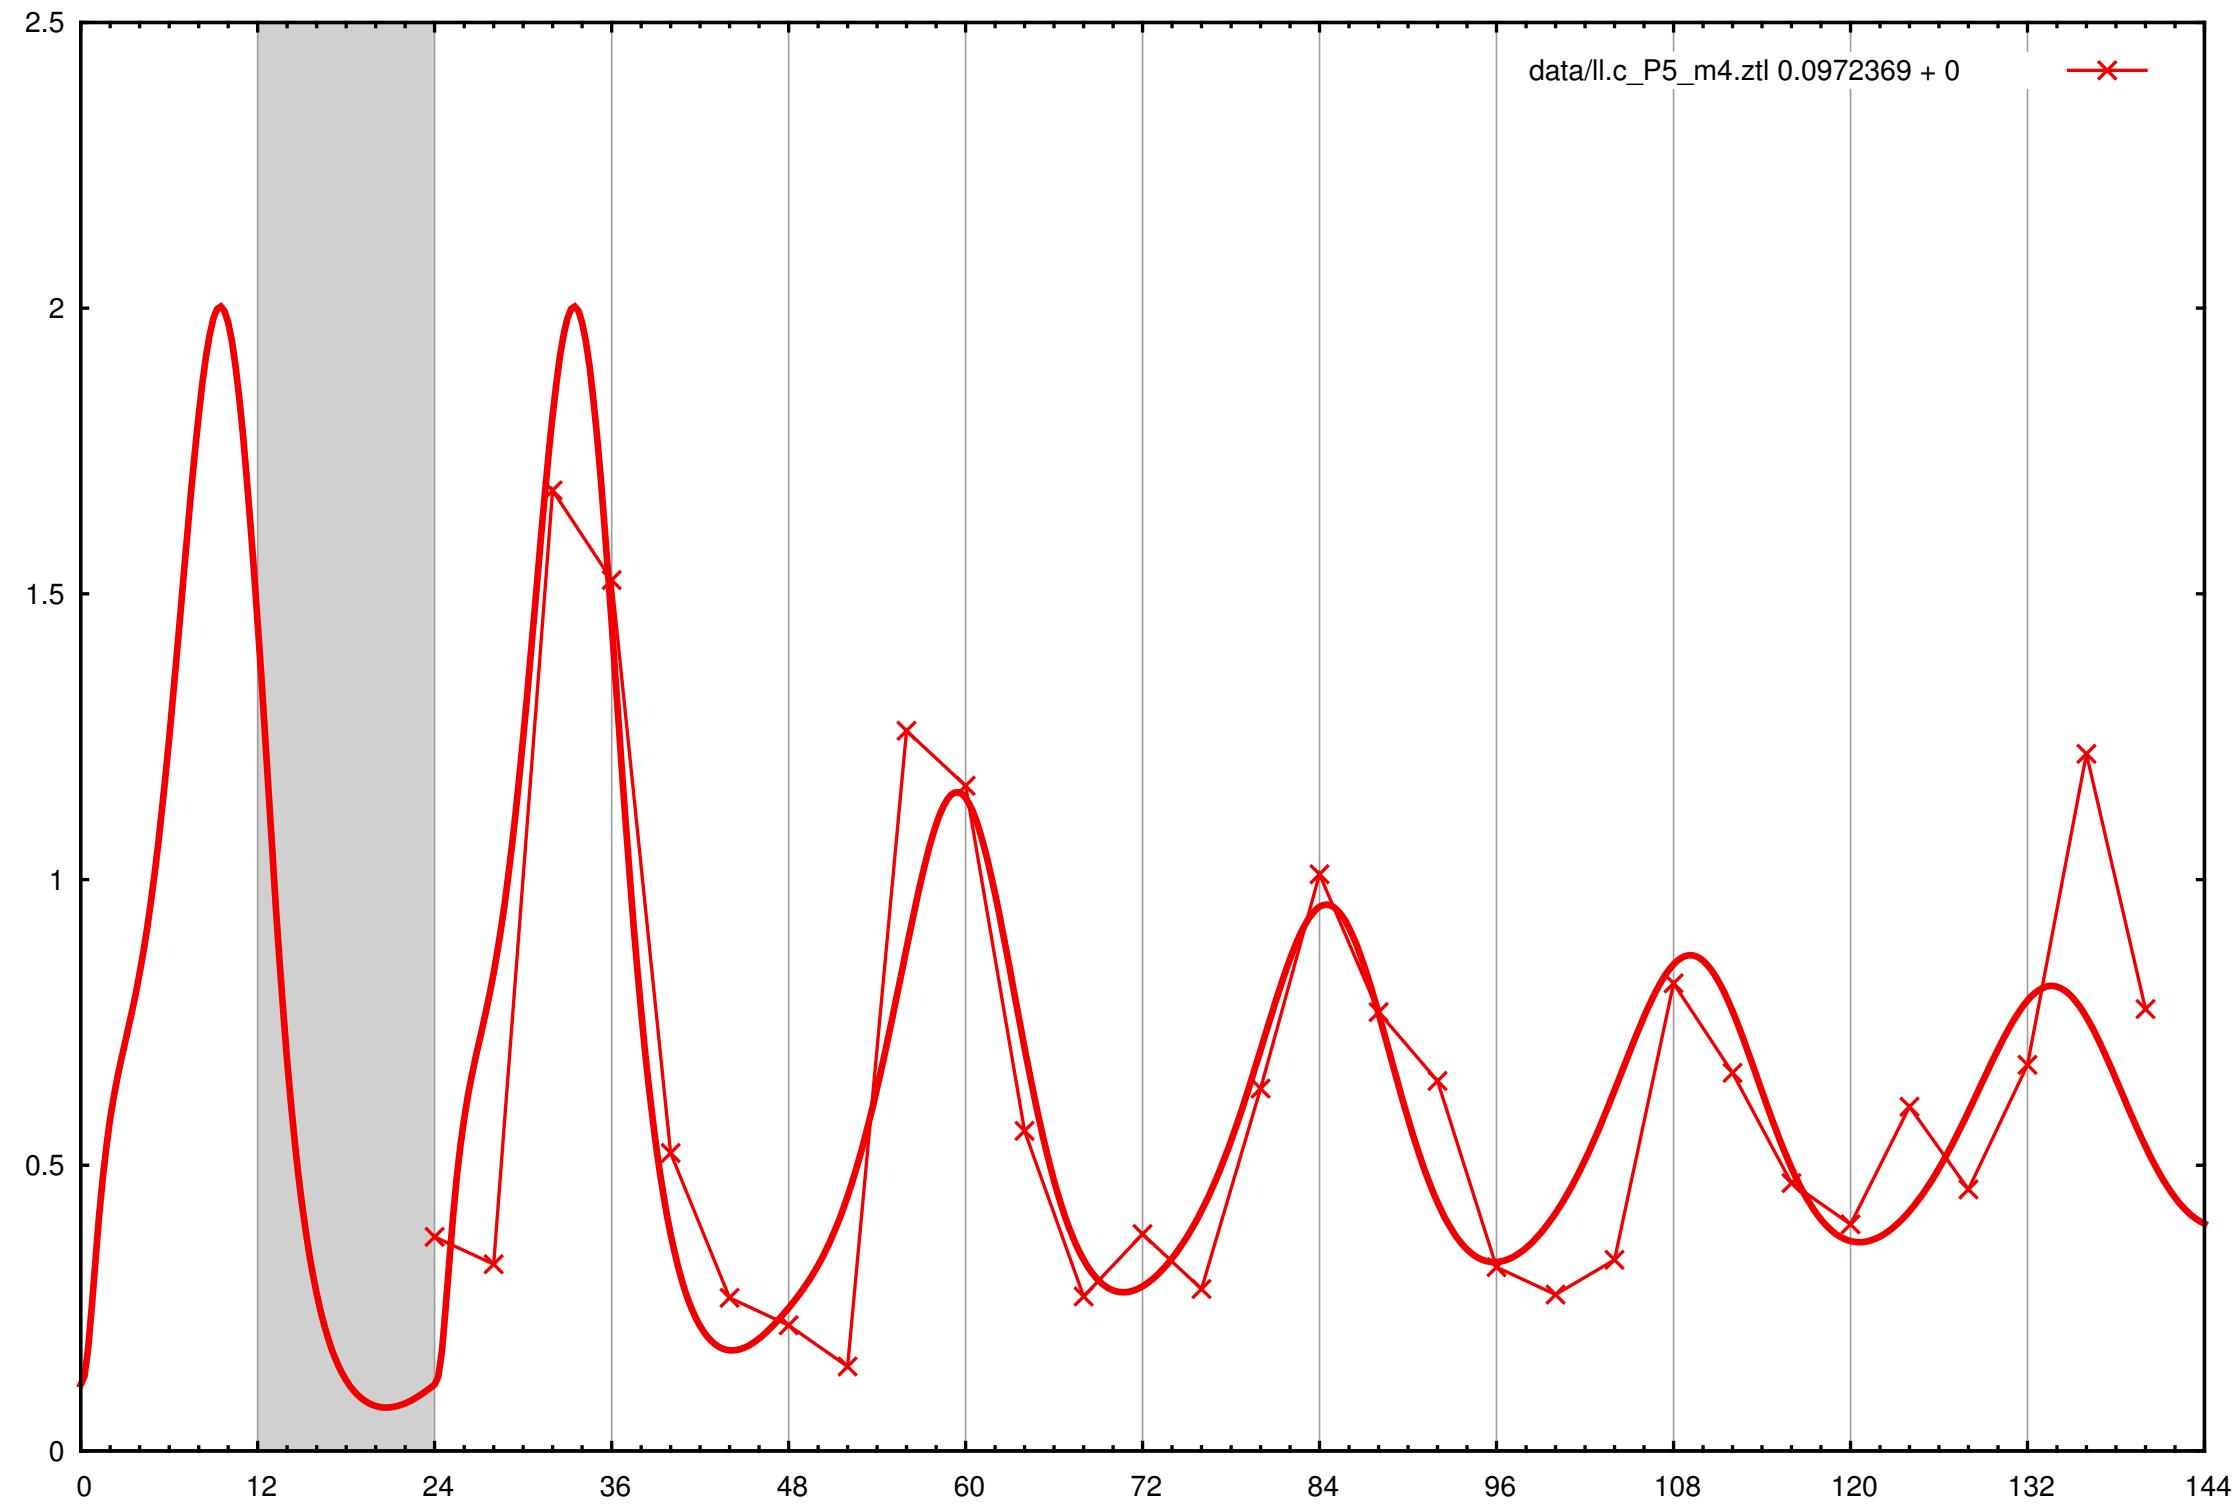

Scale group 352, scost 0

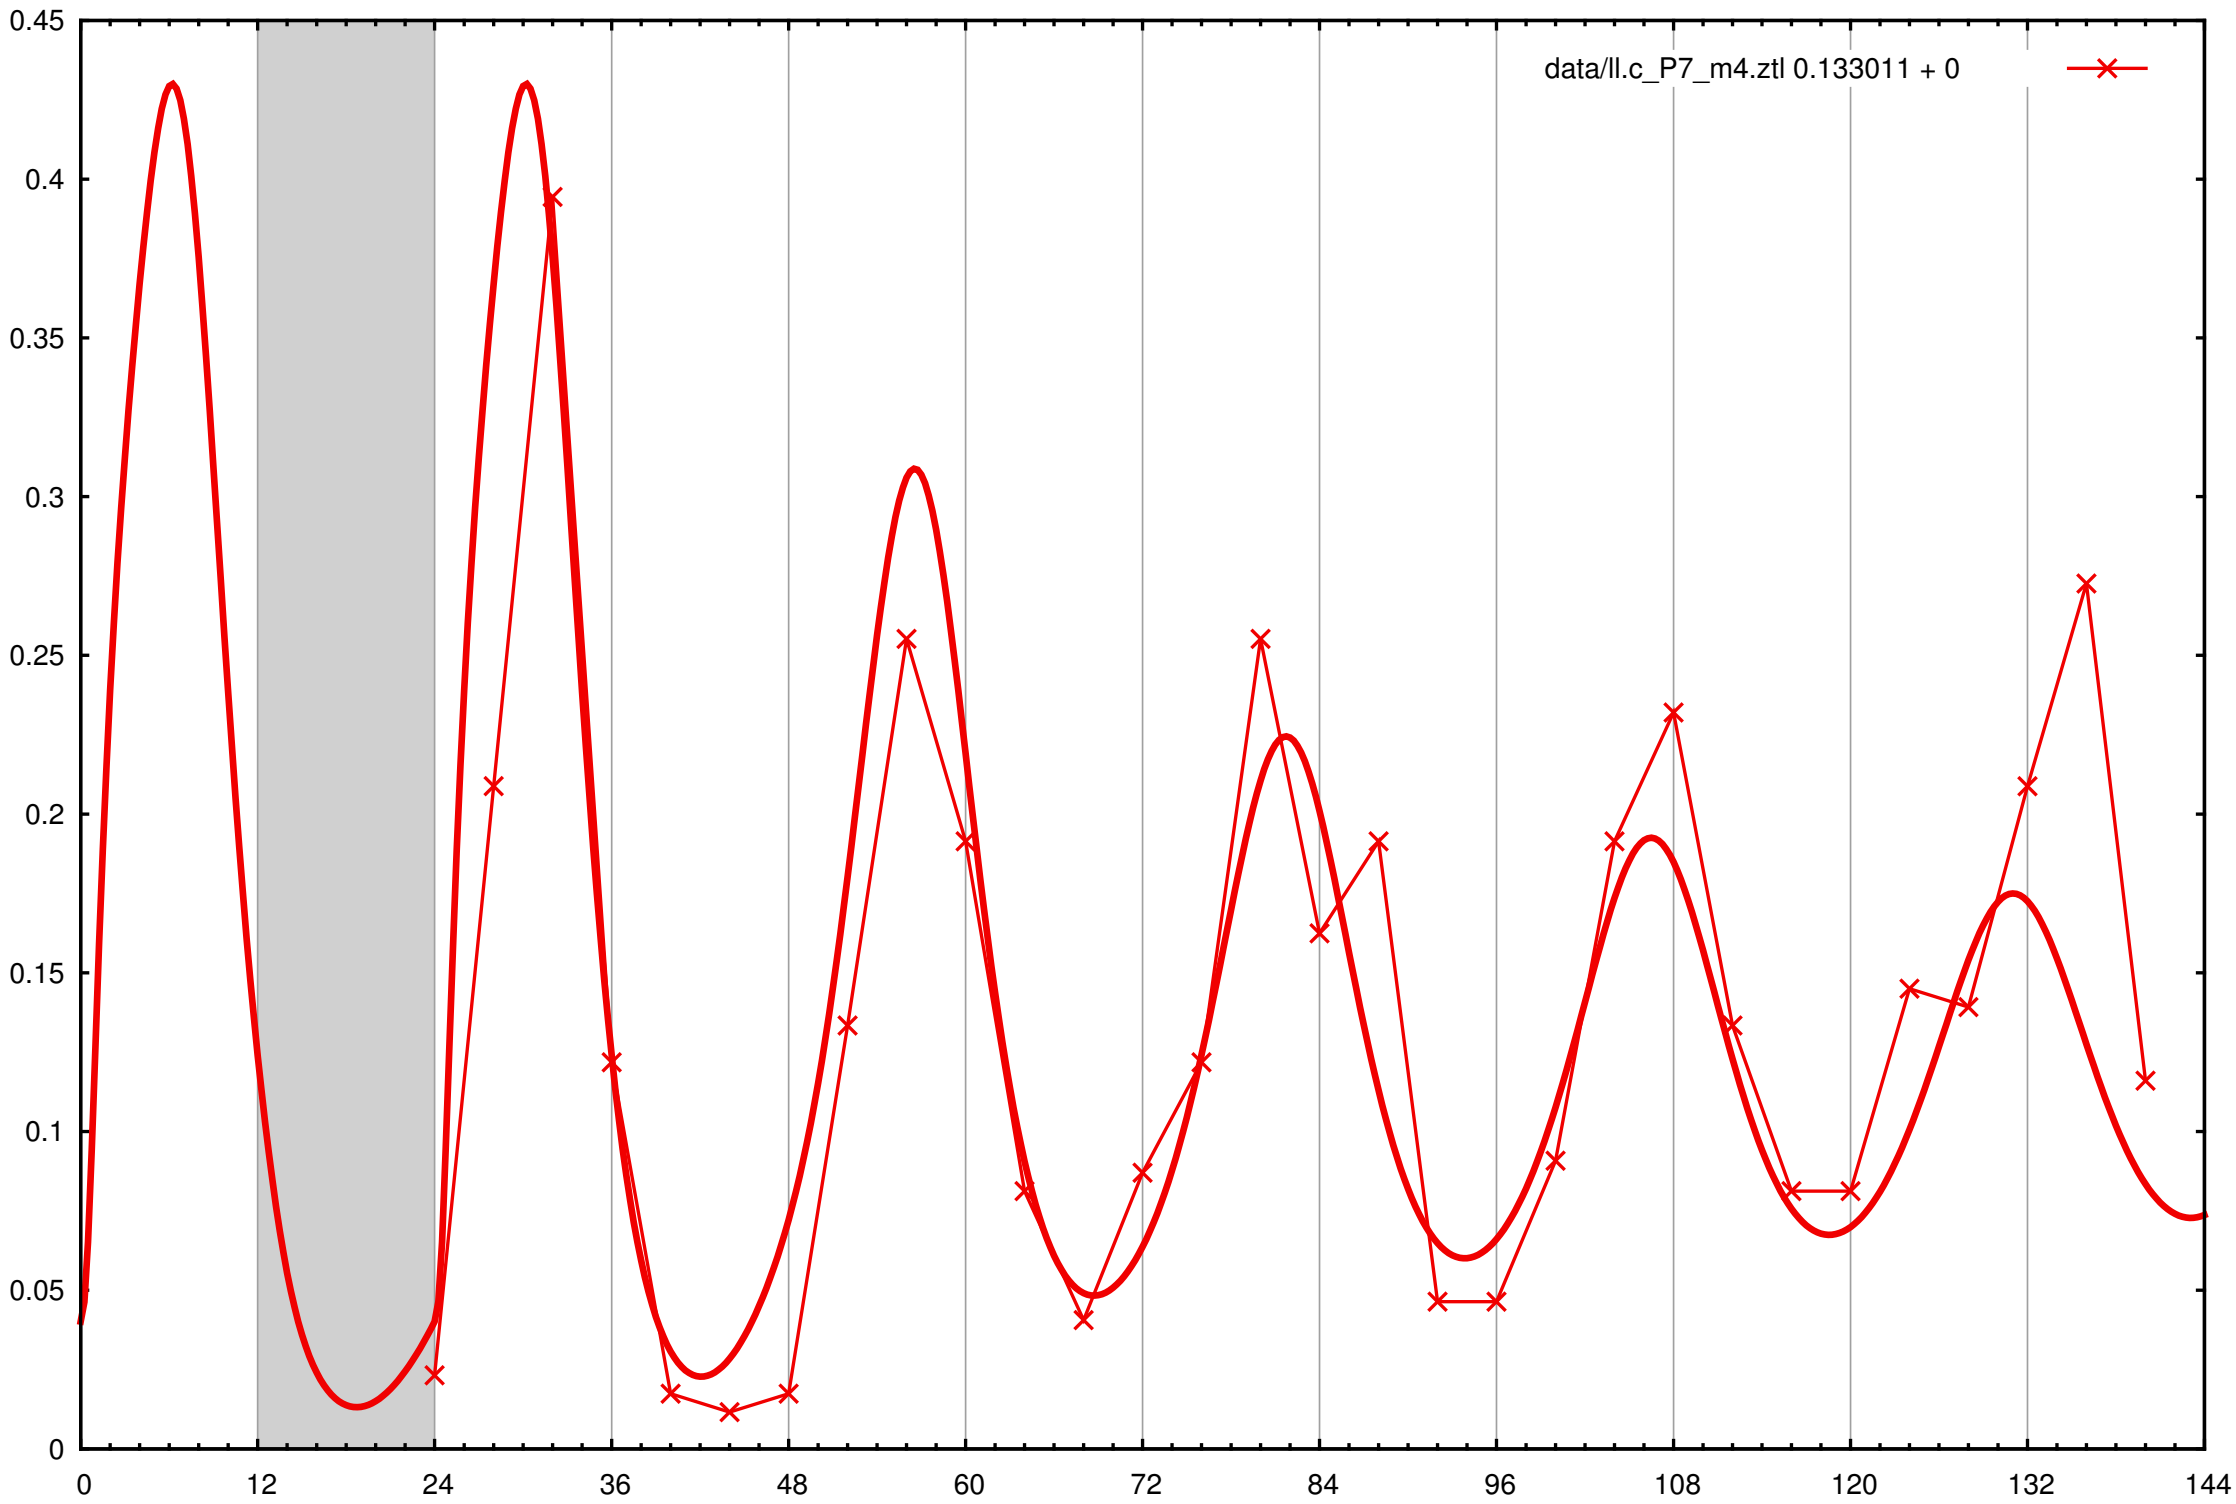



Scale group 353, scost 0

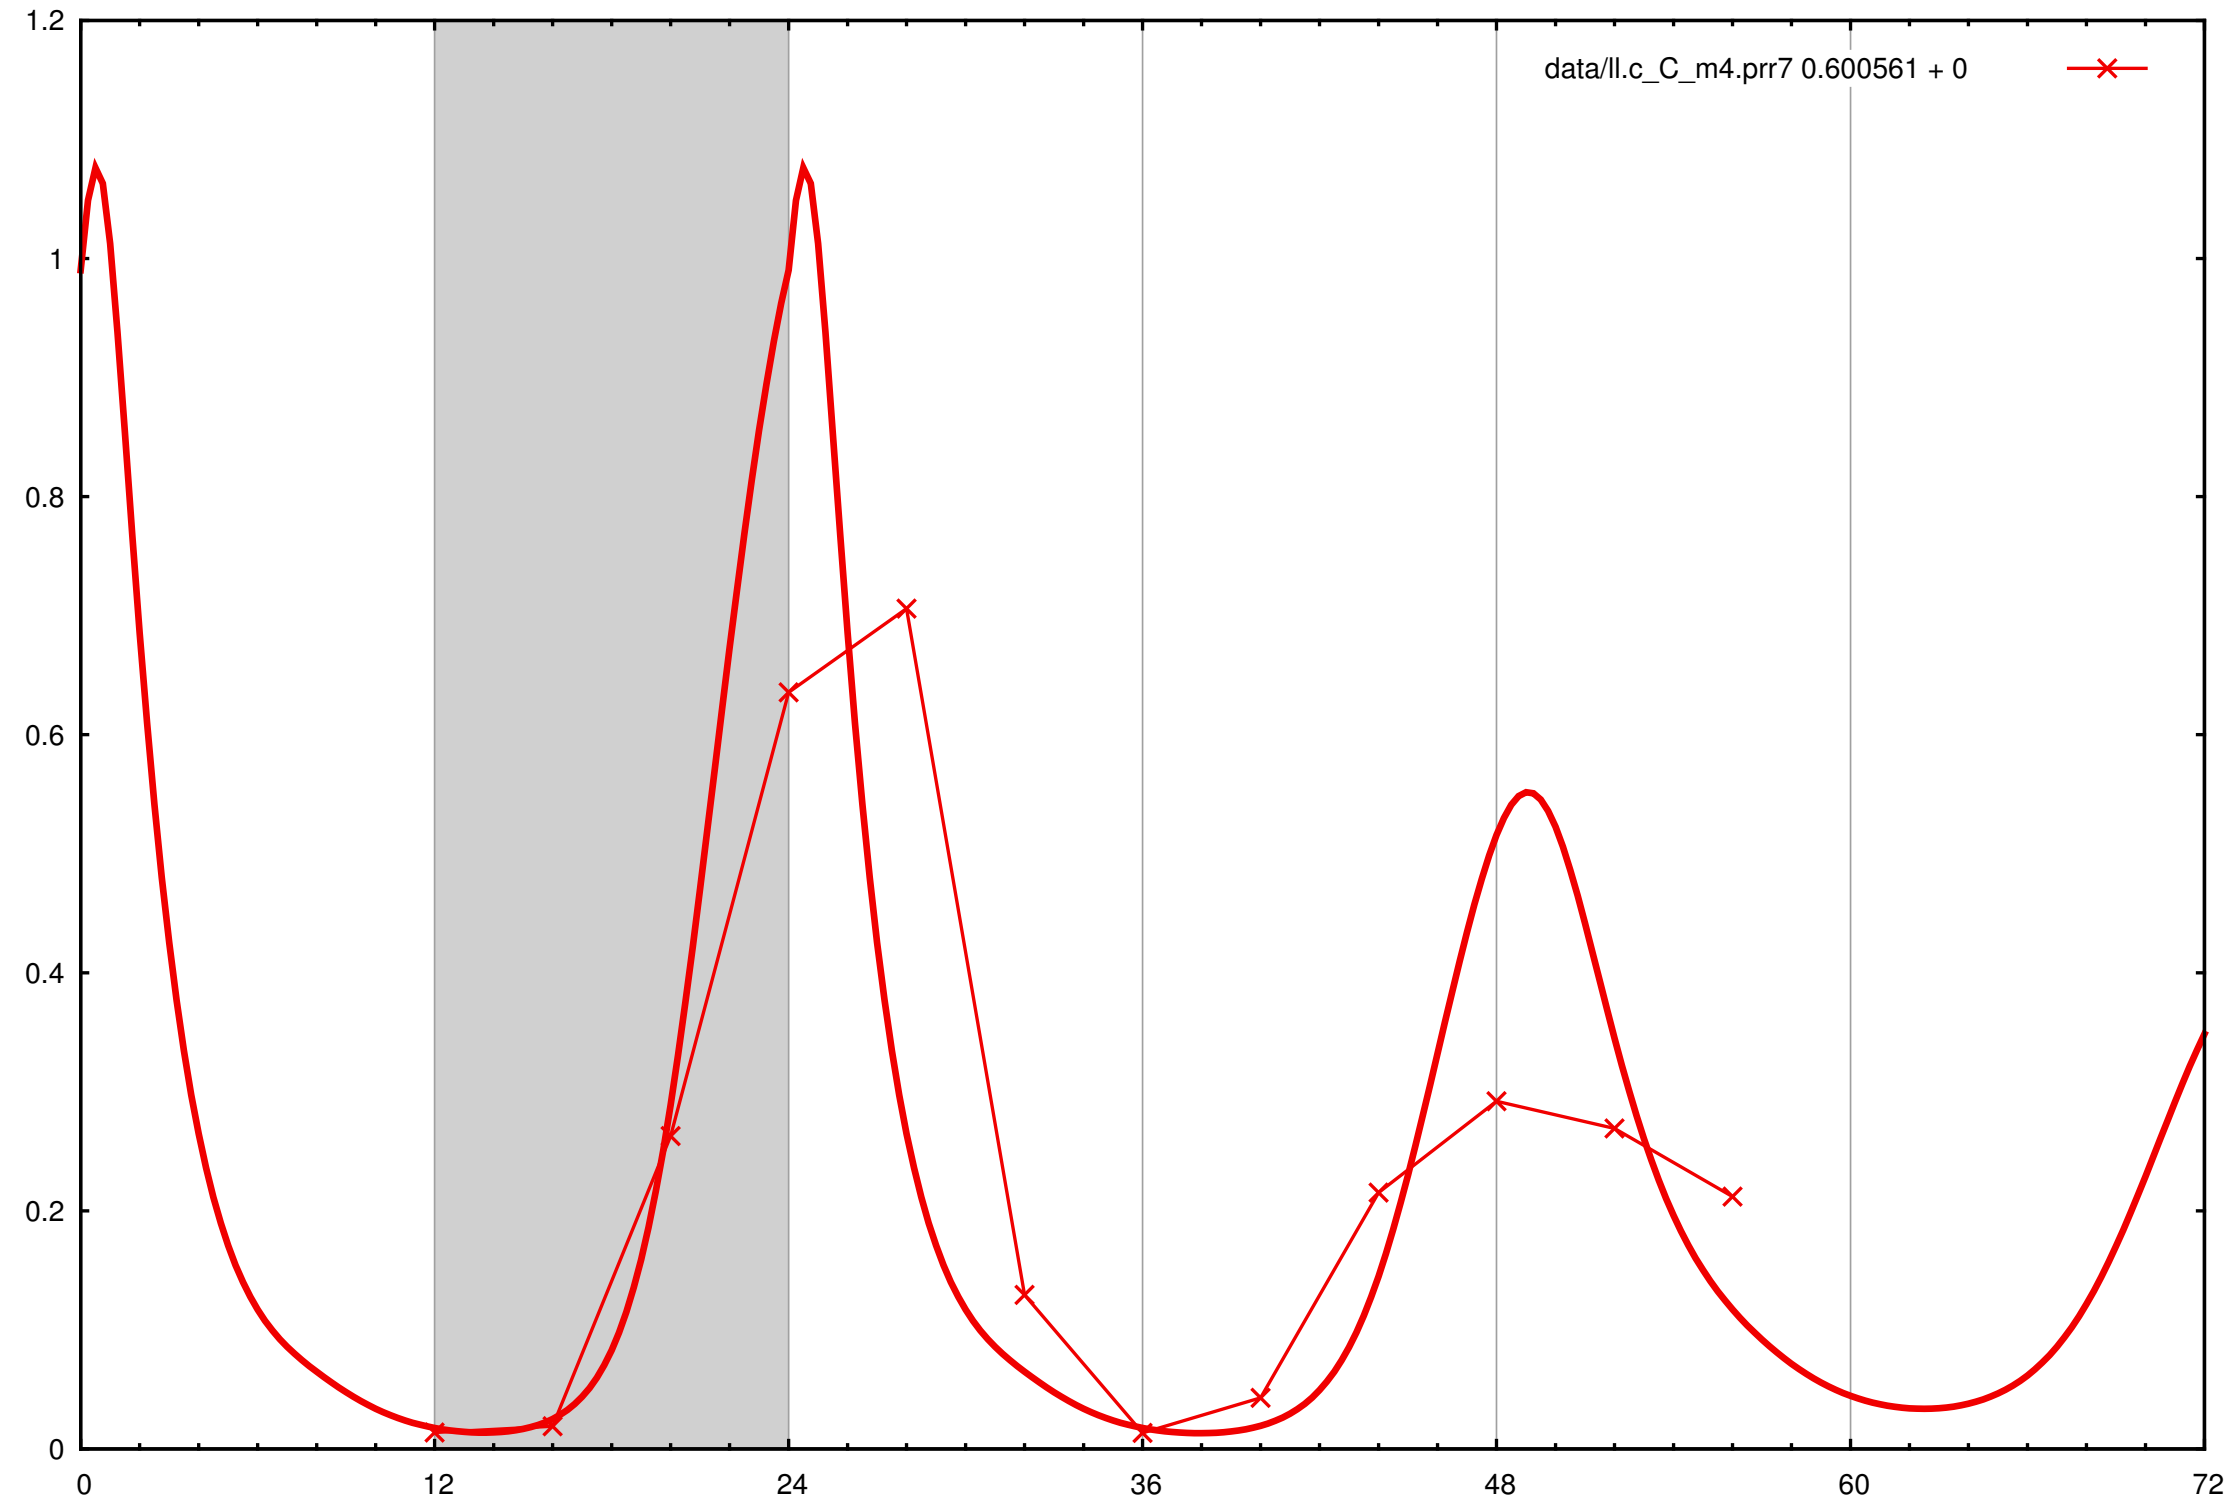

Scale group 354, scost 0

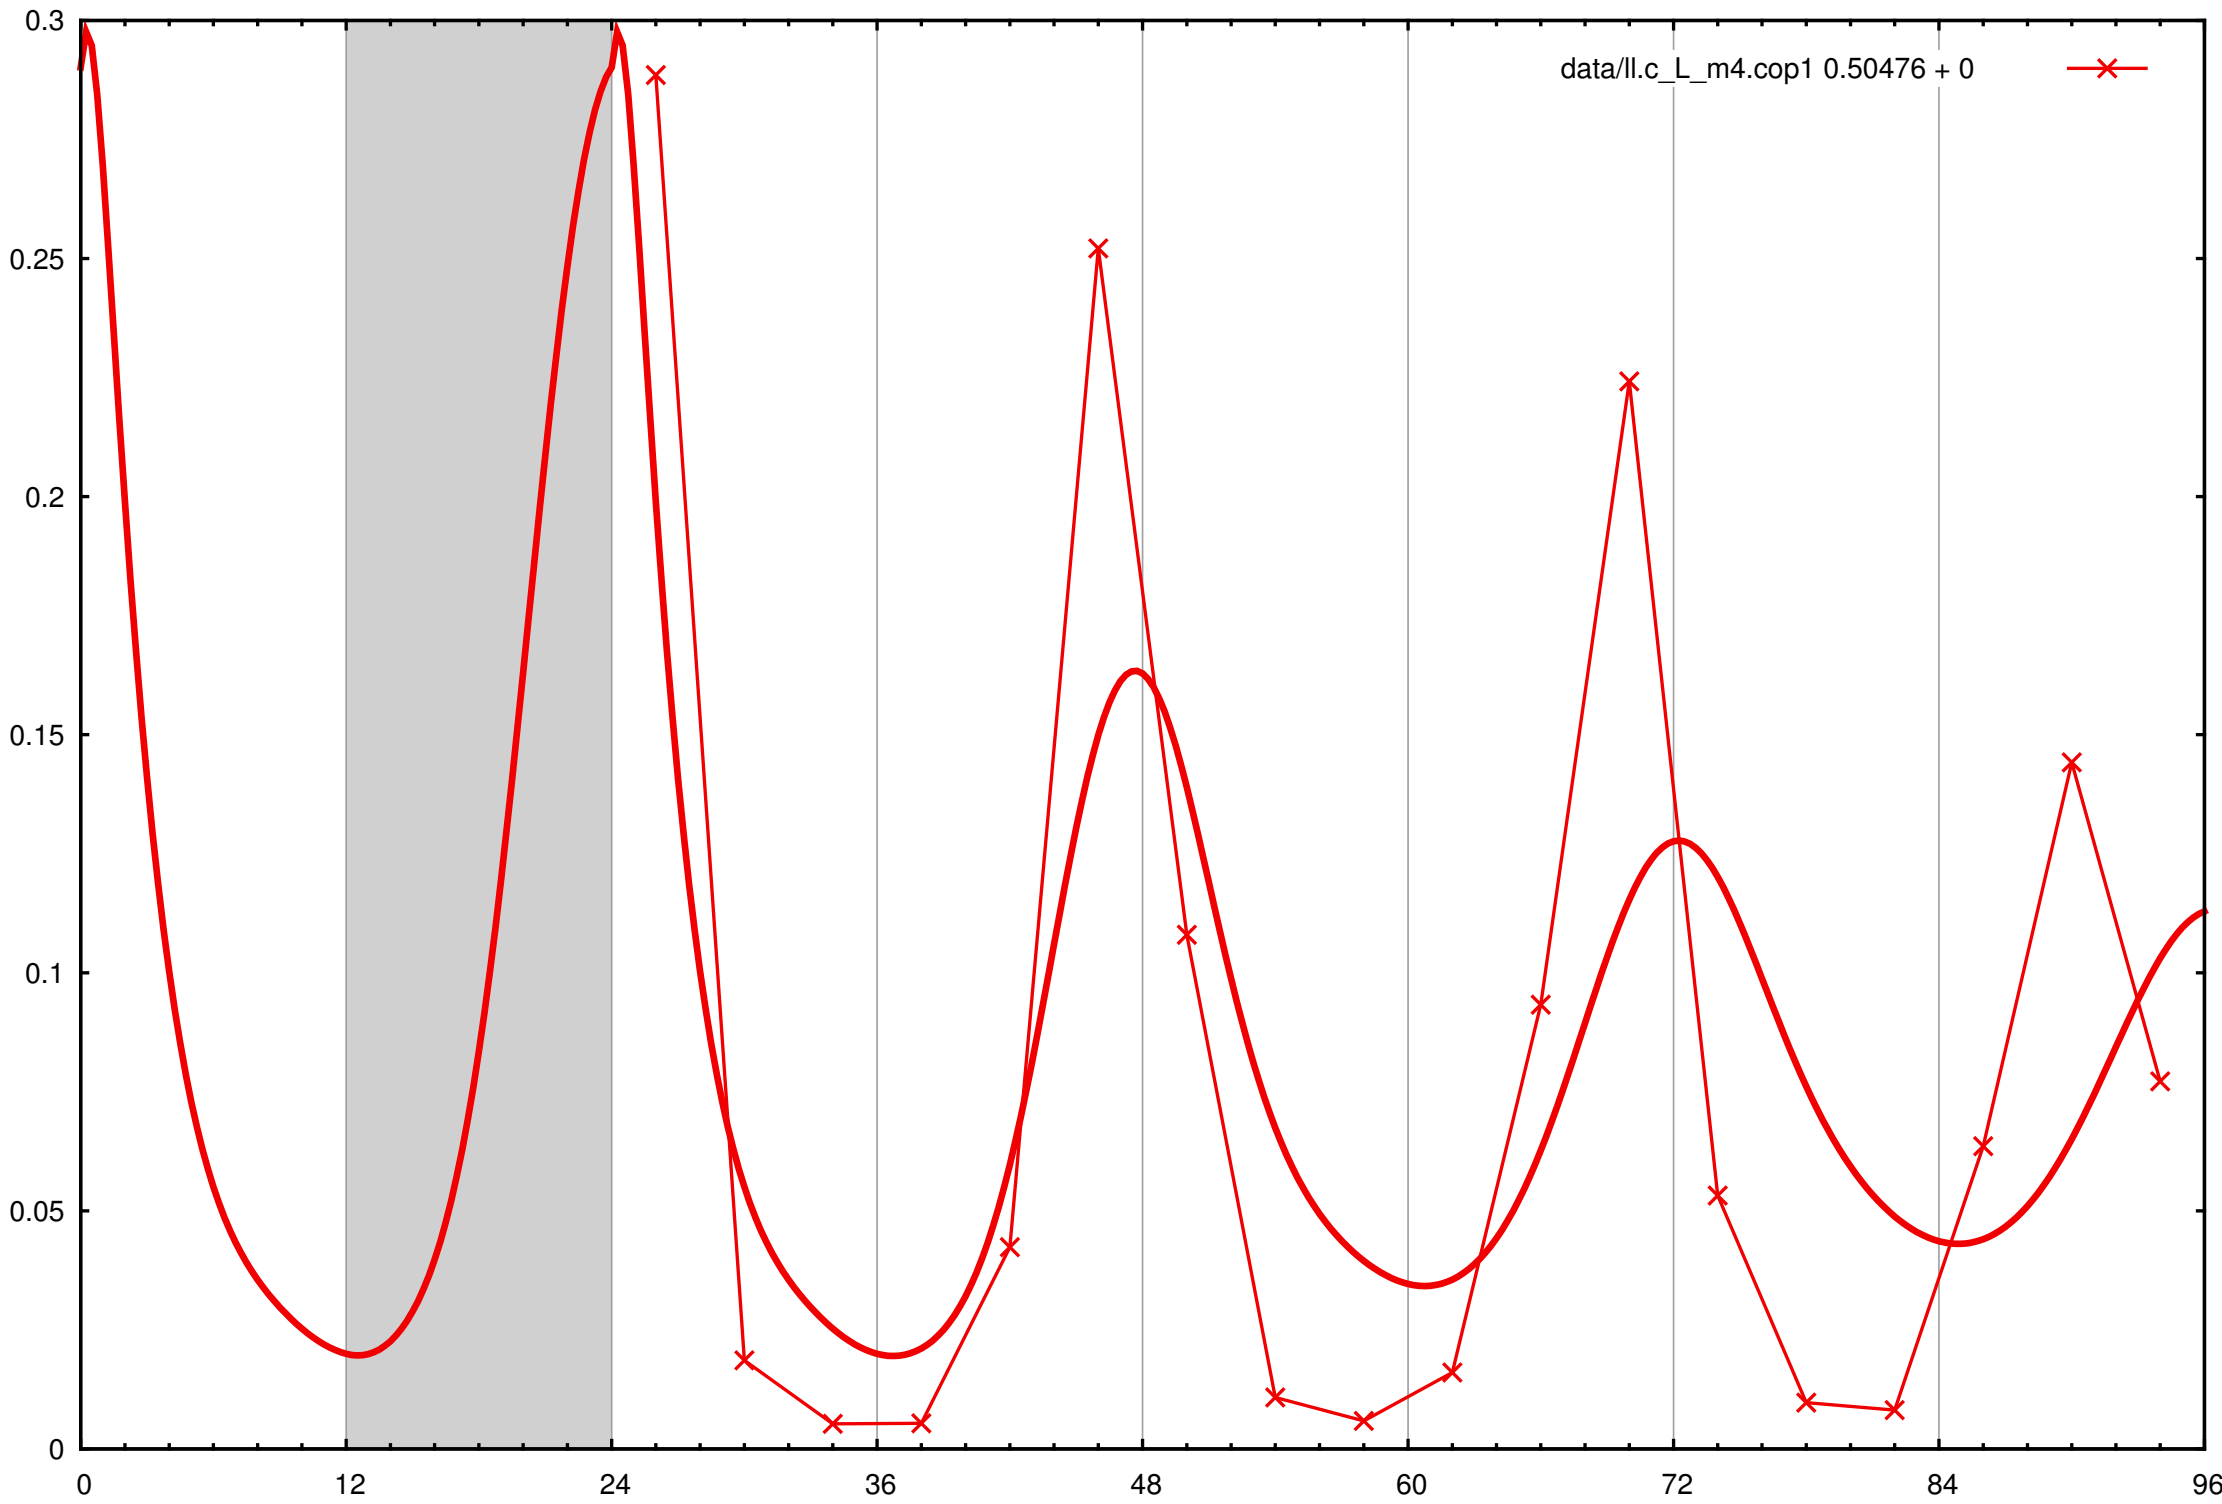

Scale group 355, scost 0

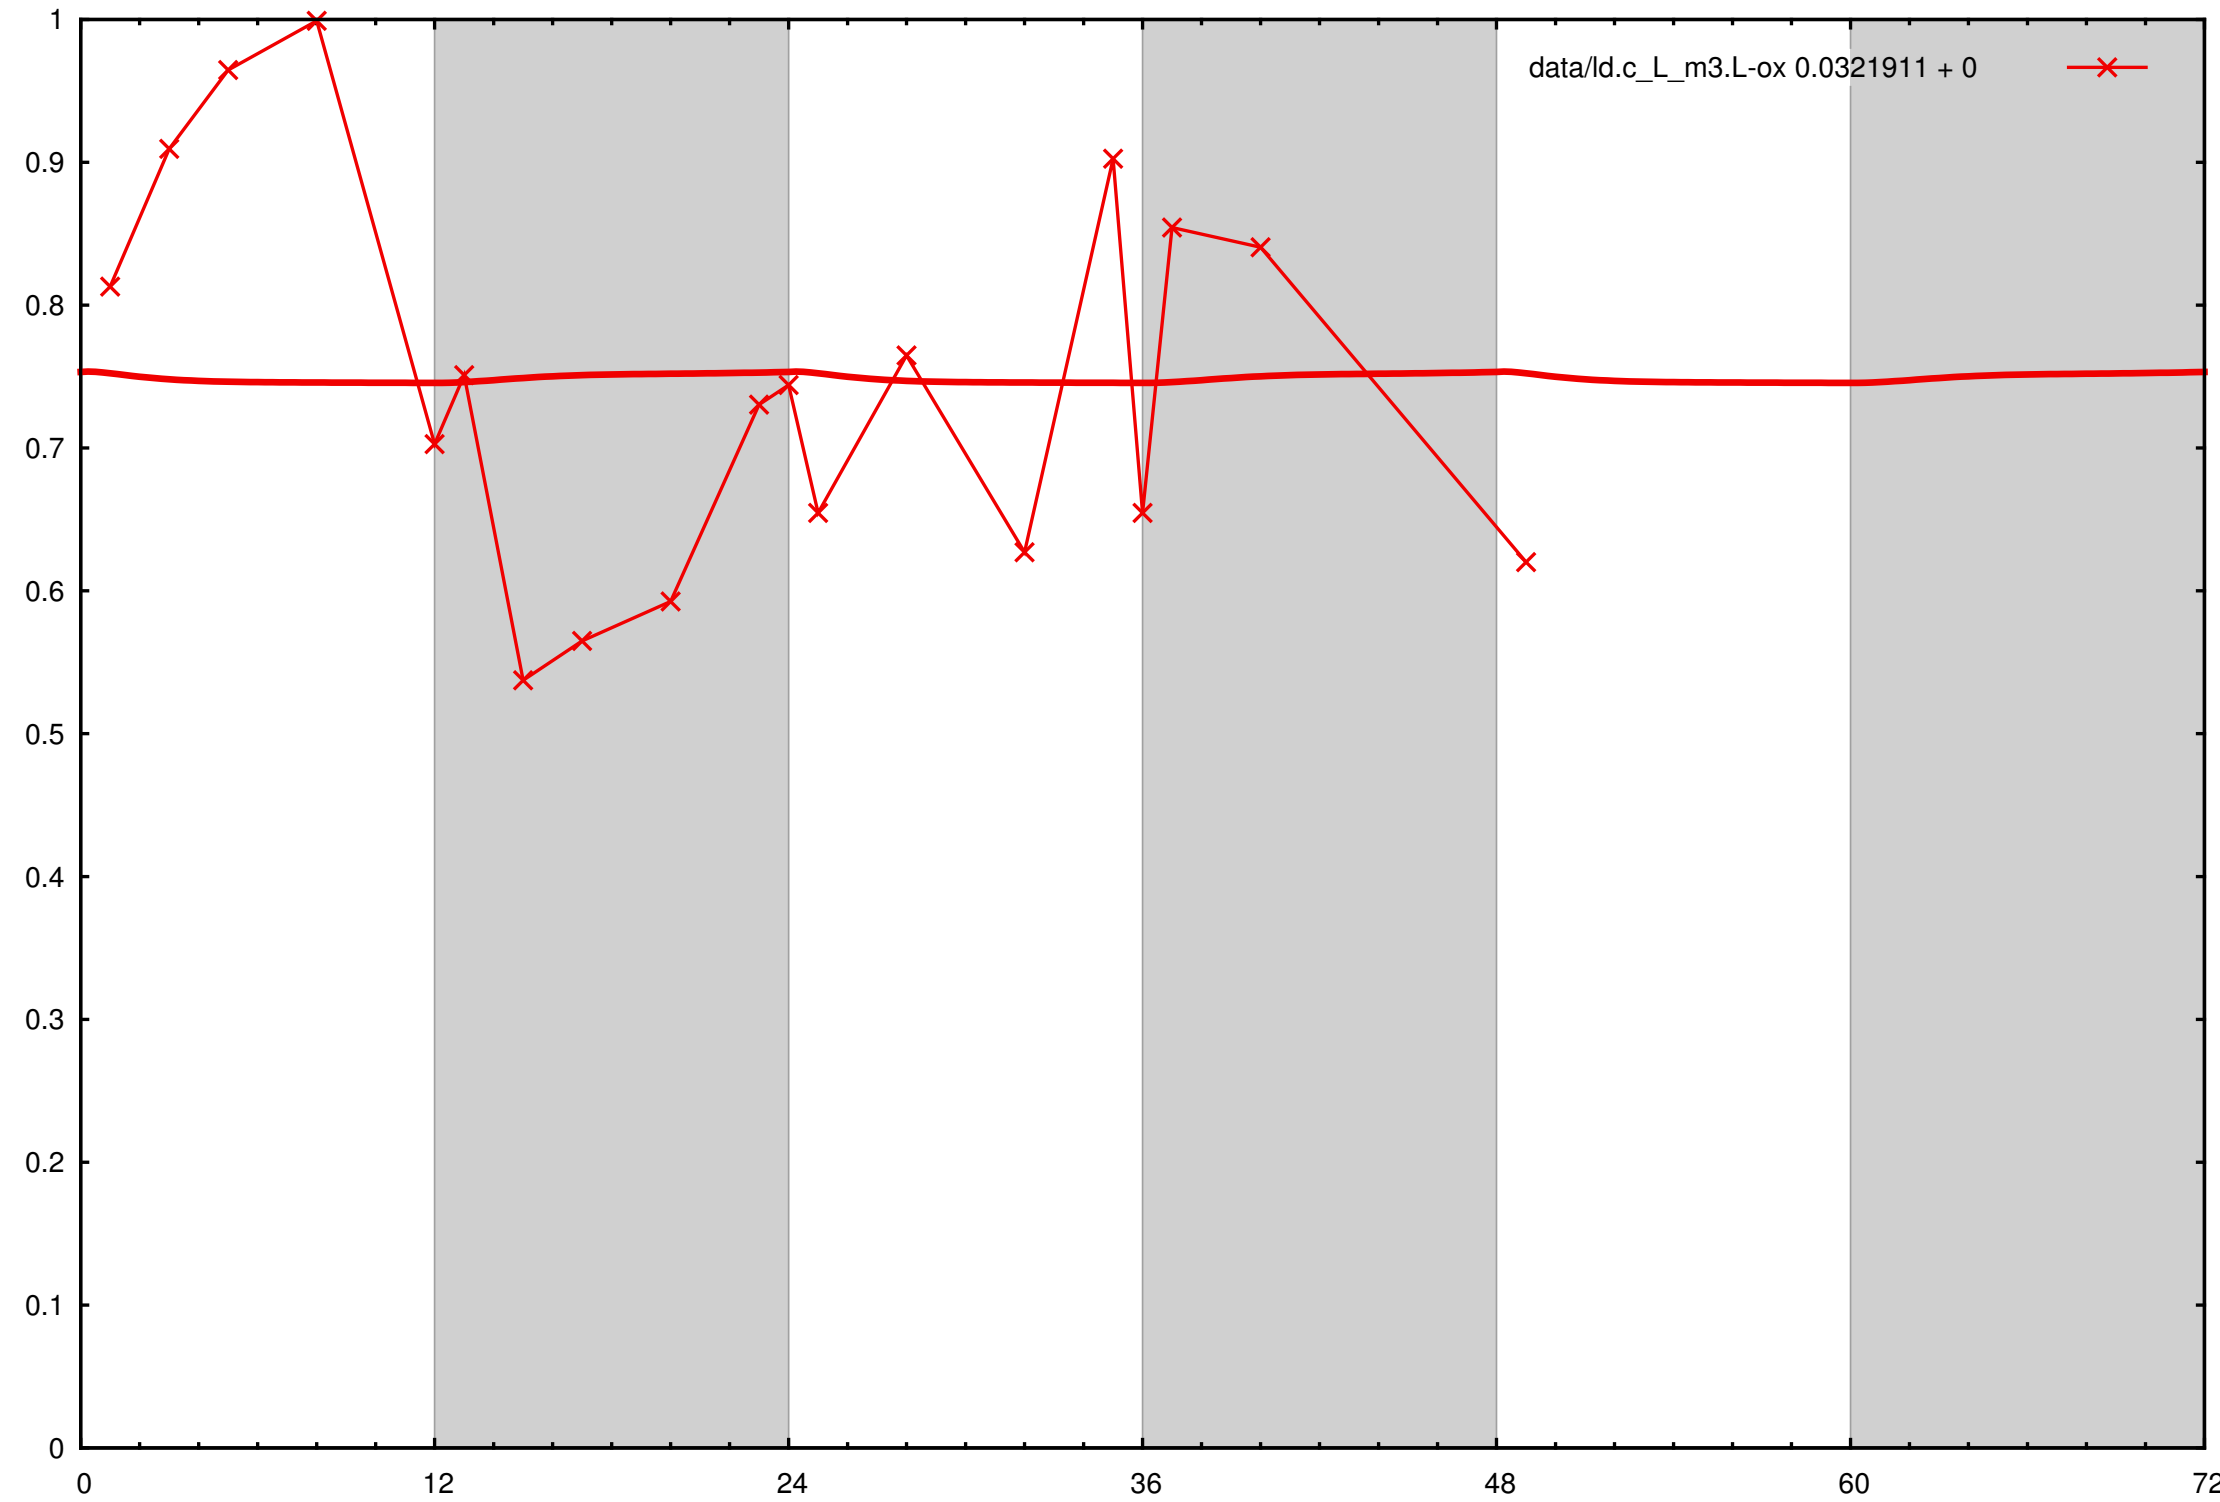

Scale group 356, scost 0

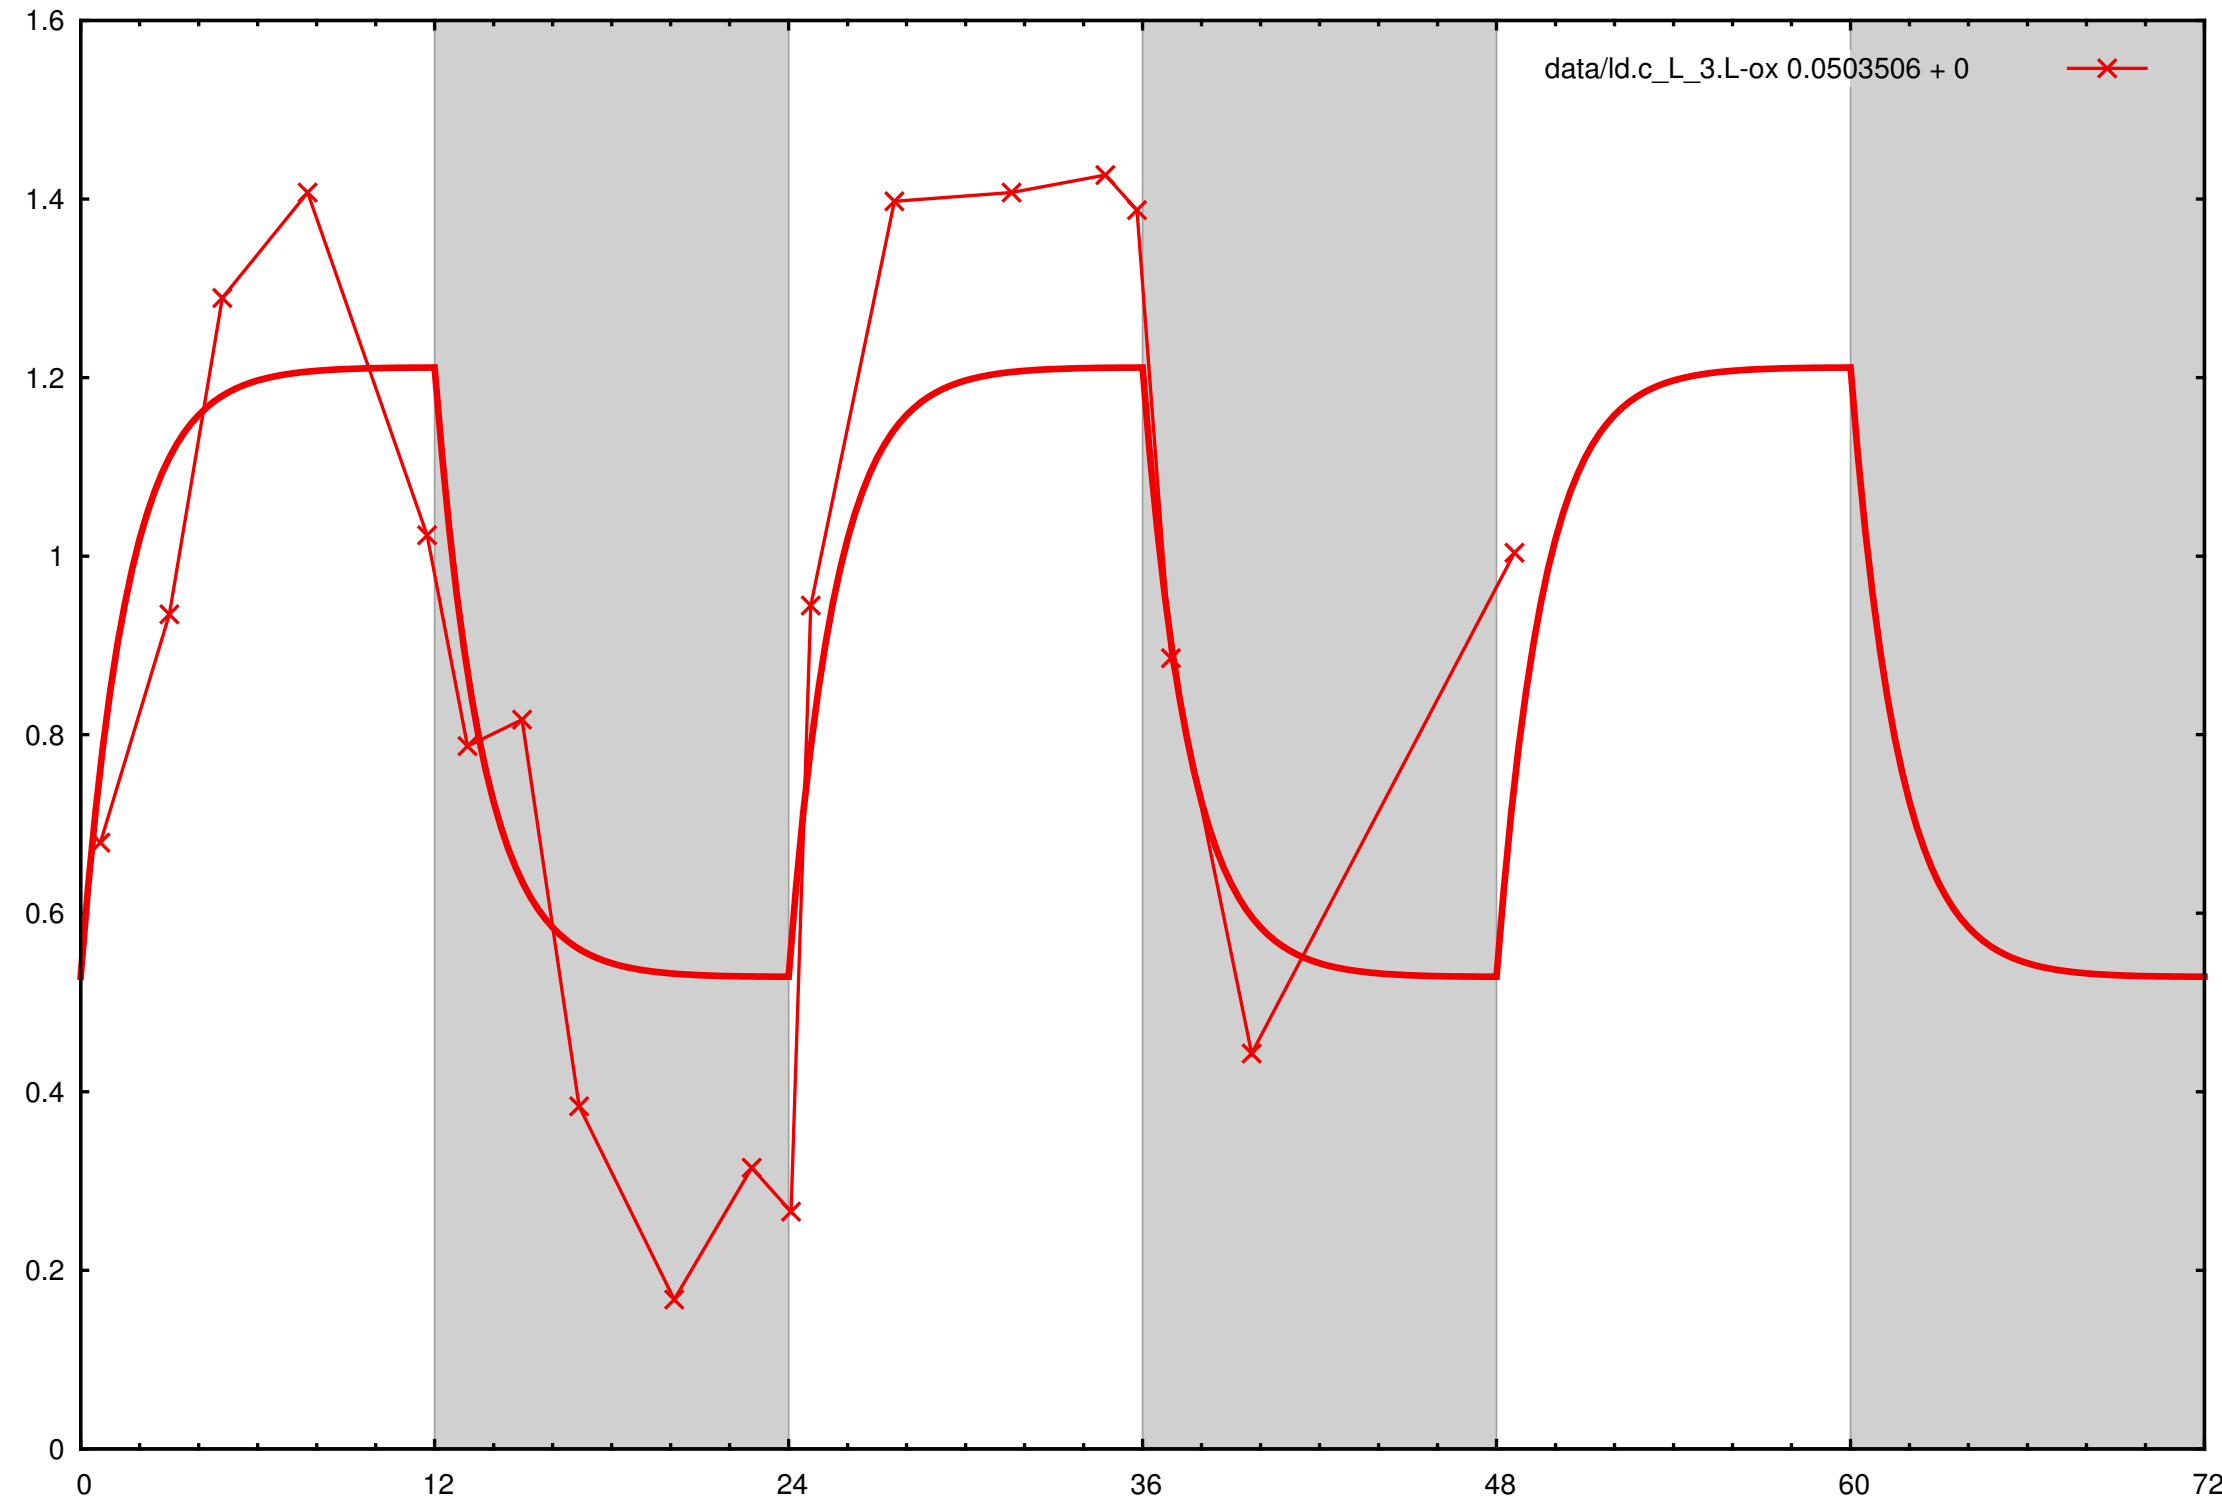

data/ld.c\_L\_3.L-ox 0.0503506 + 0

x

Scale group 357, scost 0

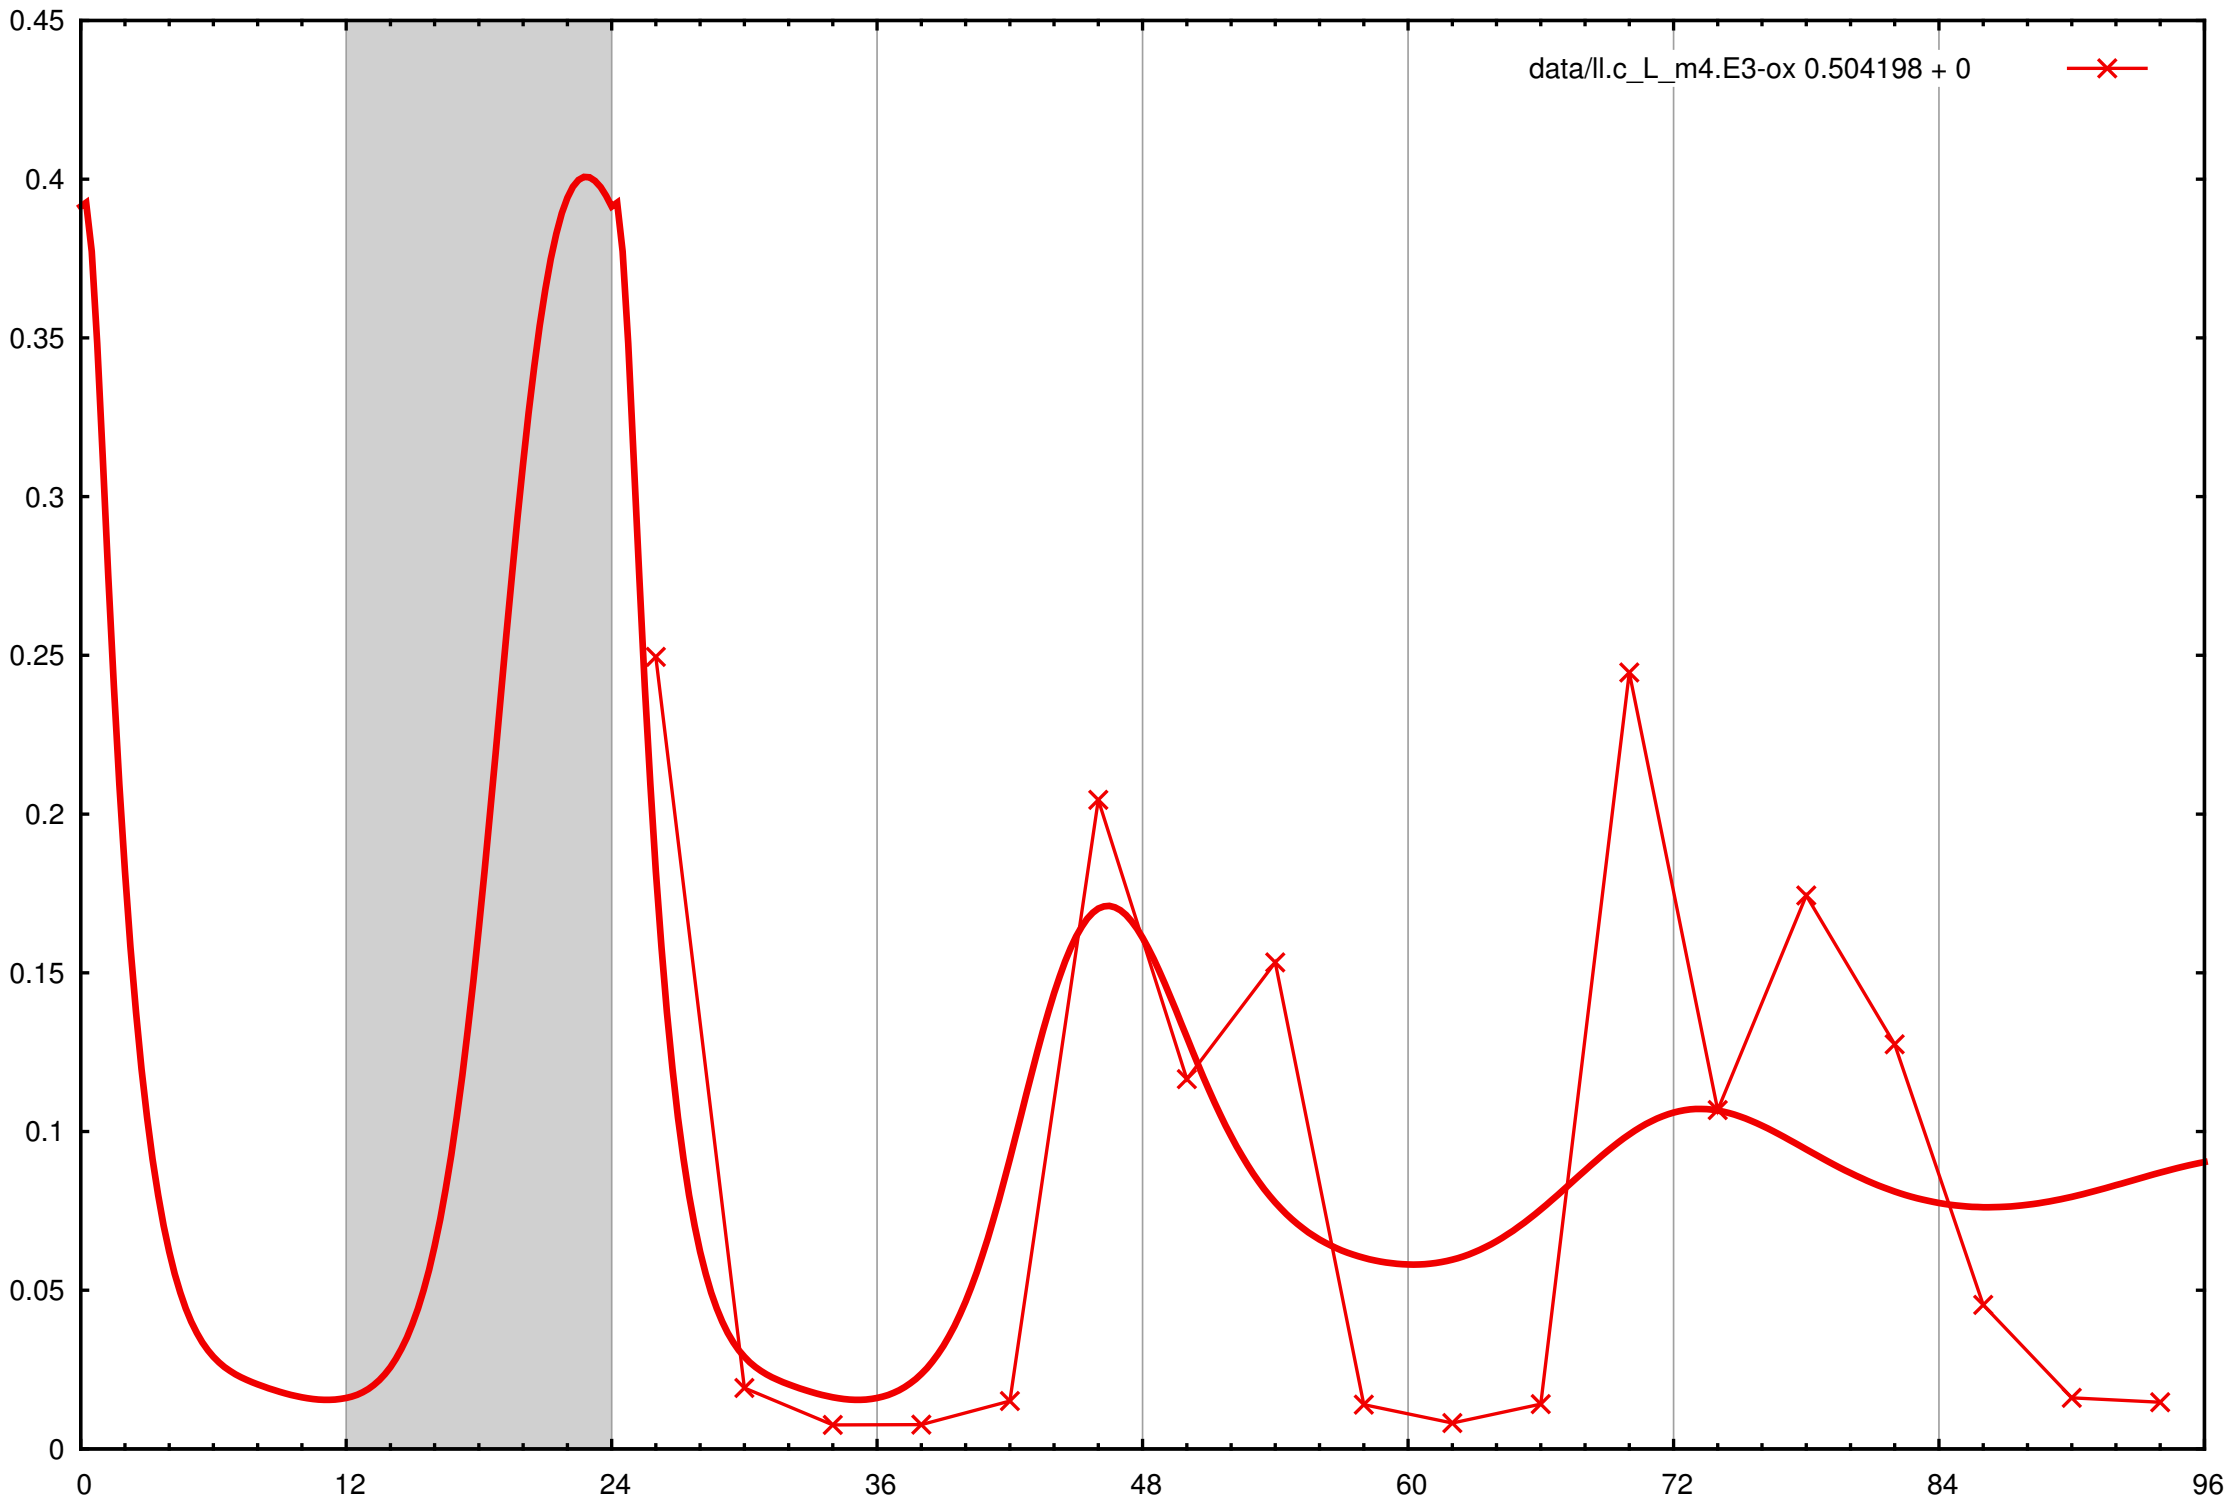

Scale group 358, scost 0

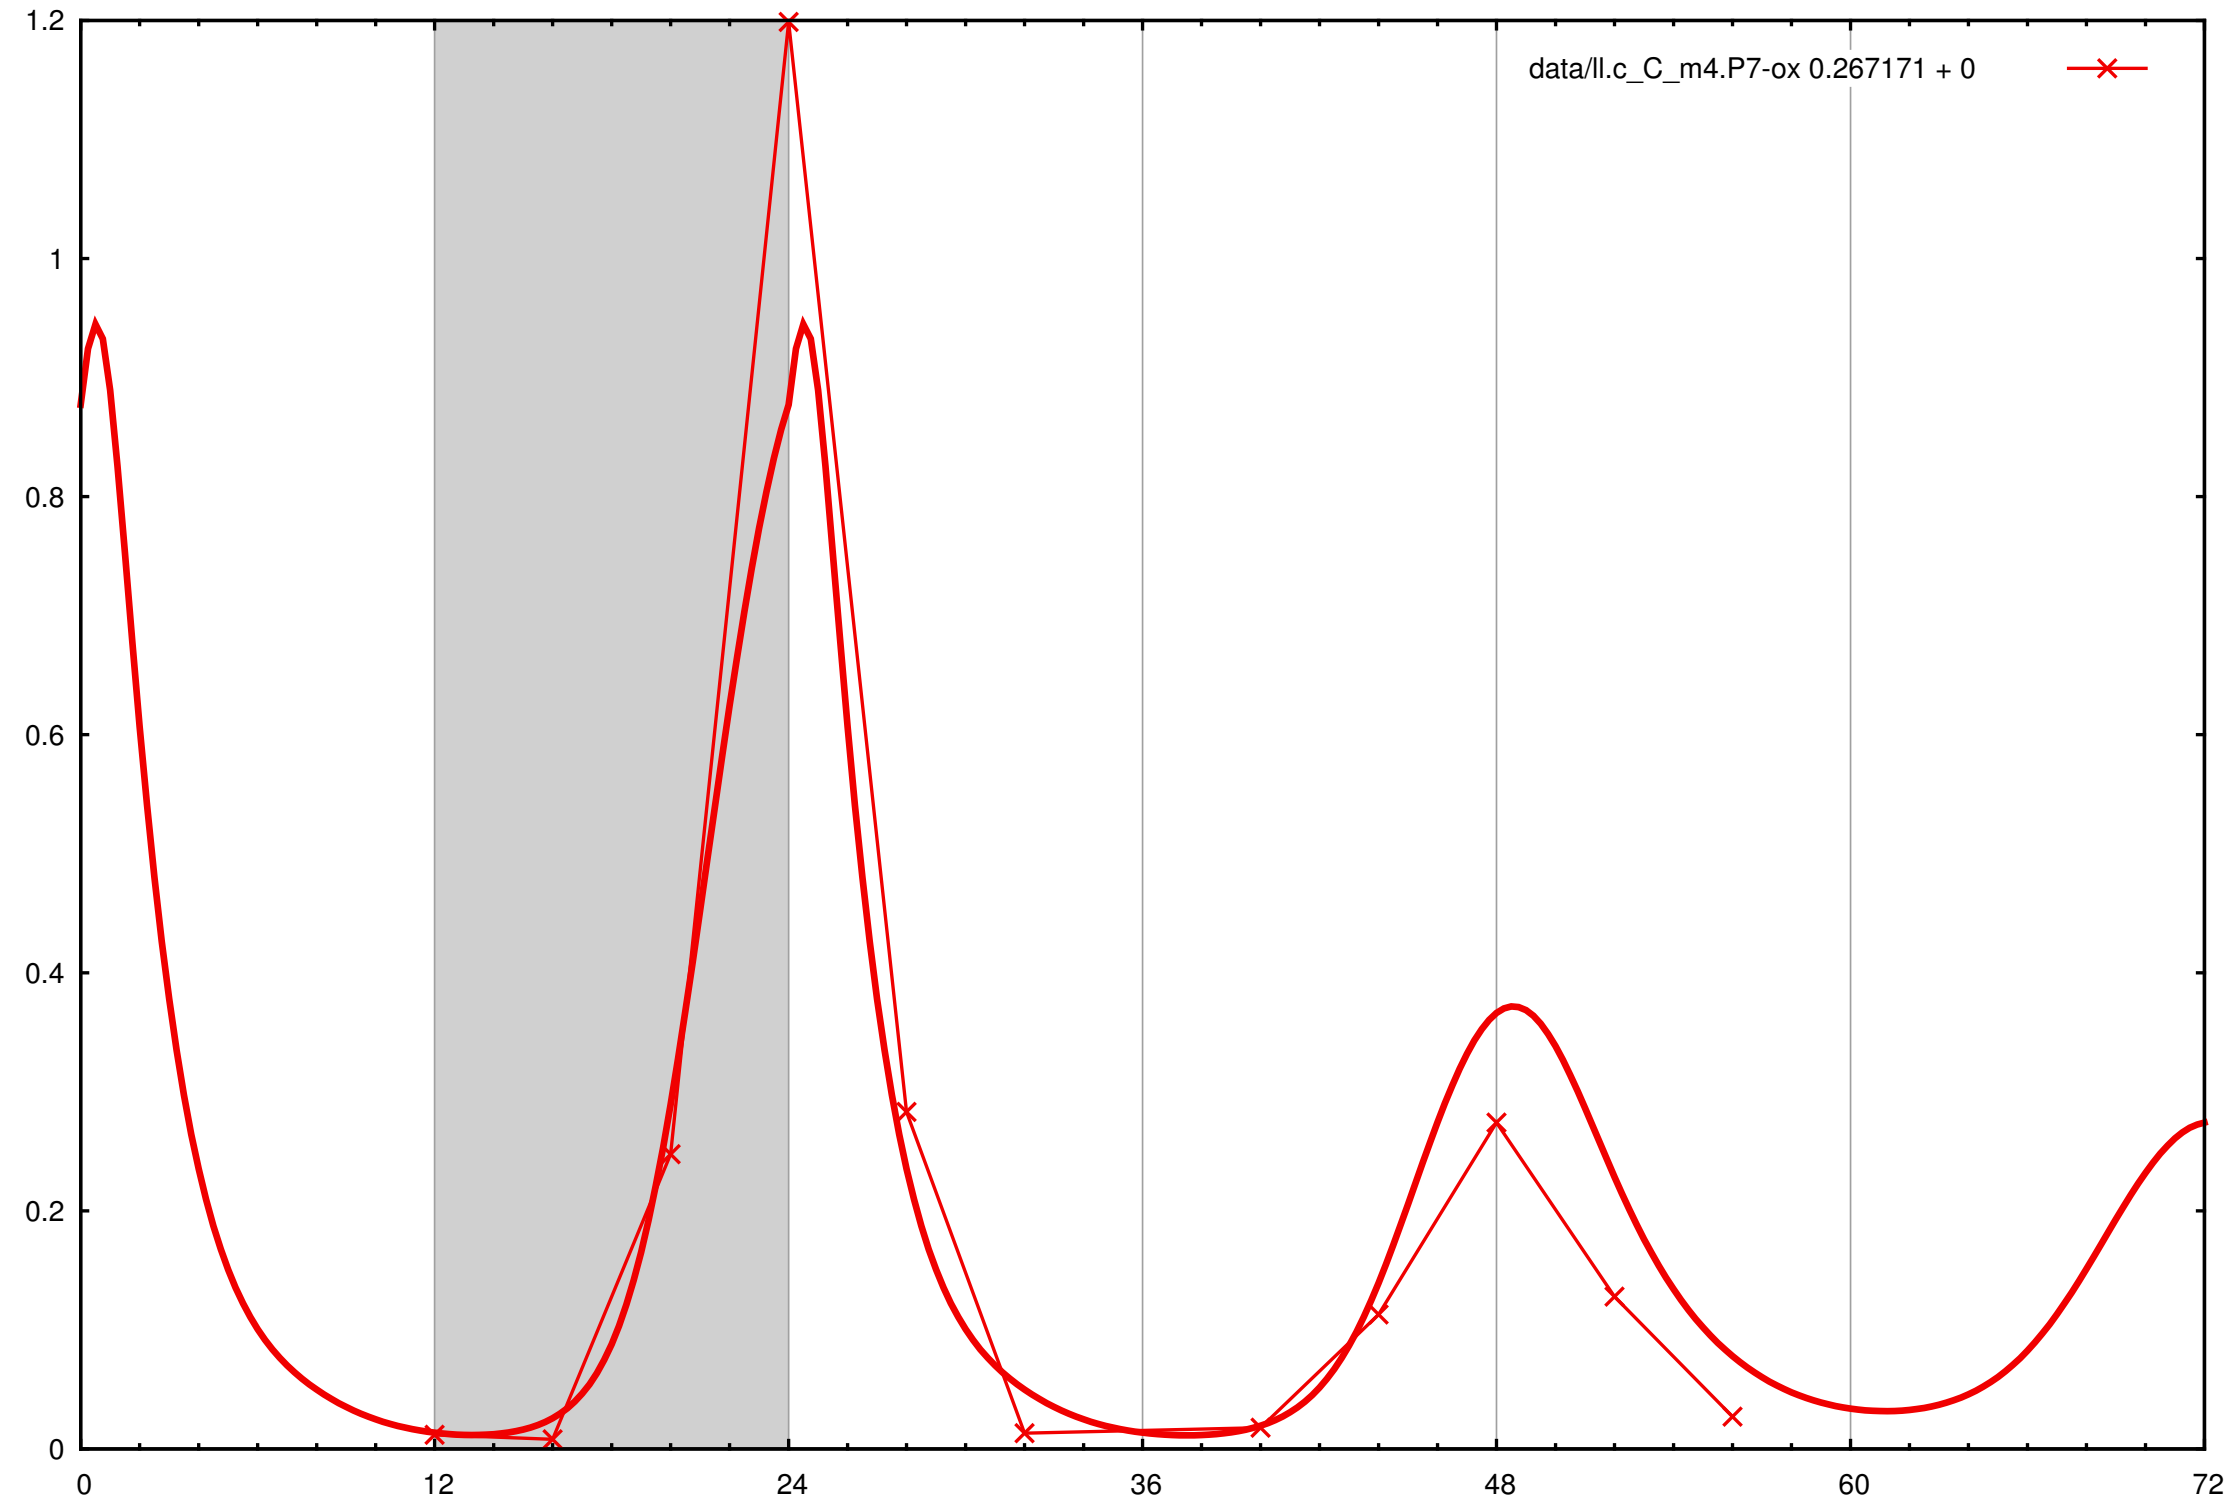

Scale group 359, scost 0

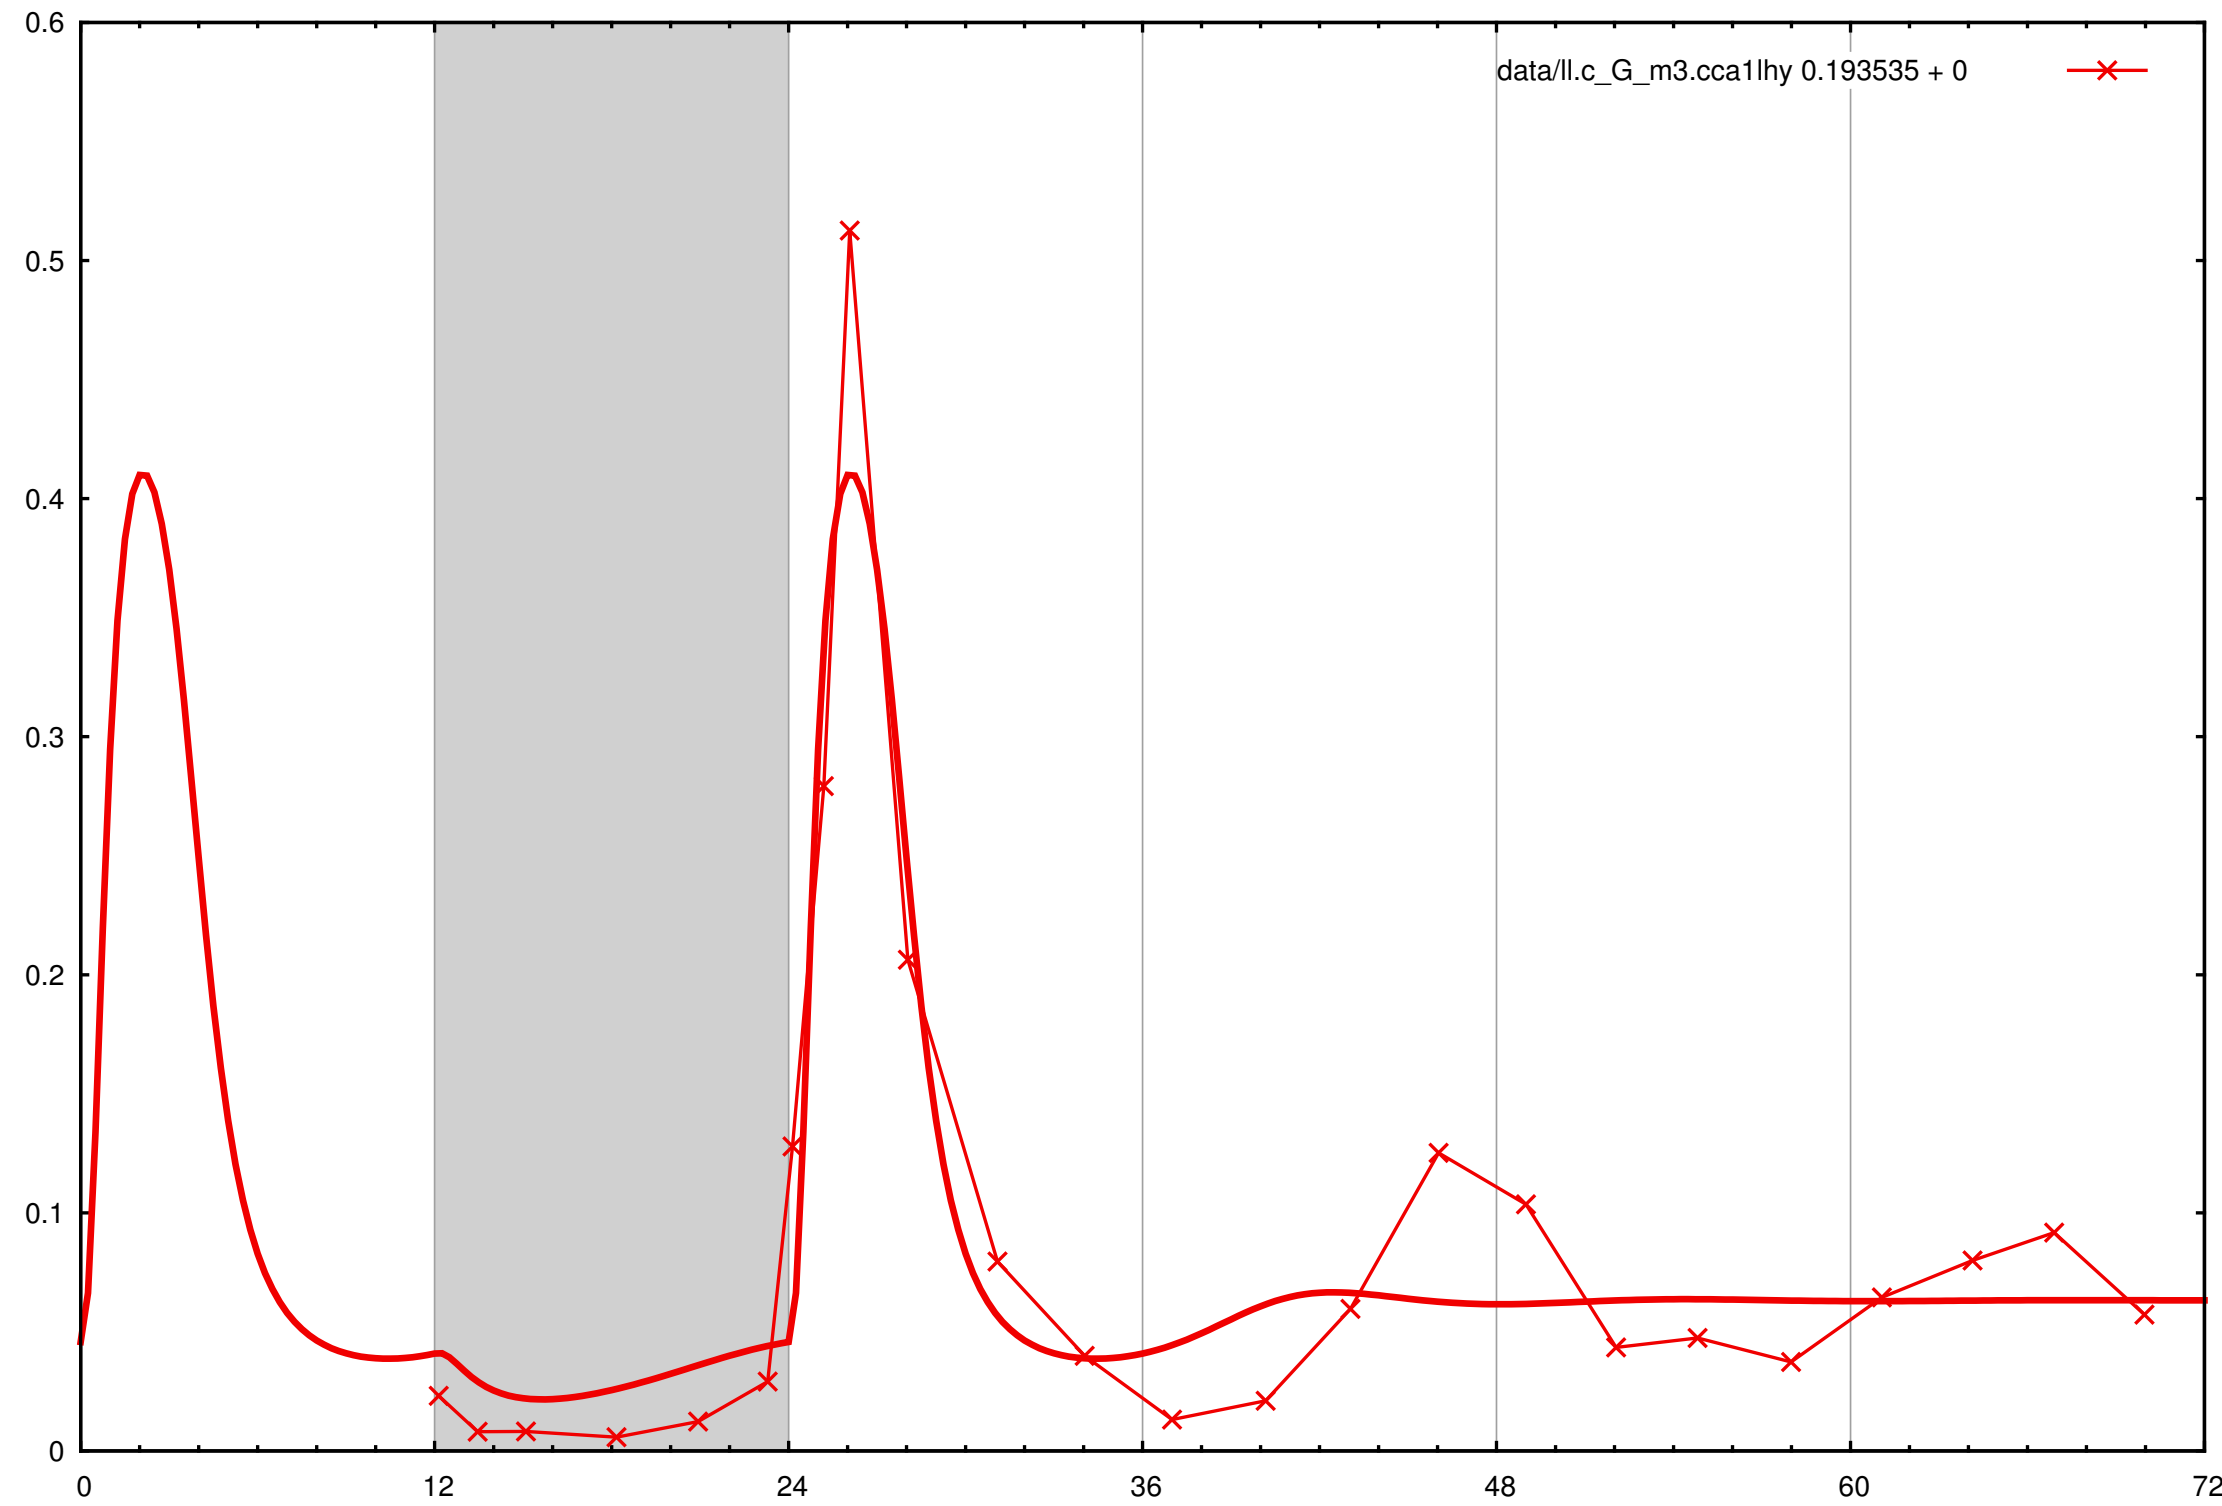

Scale group 360, scost 0

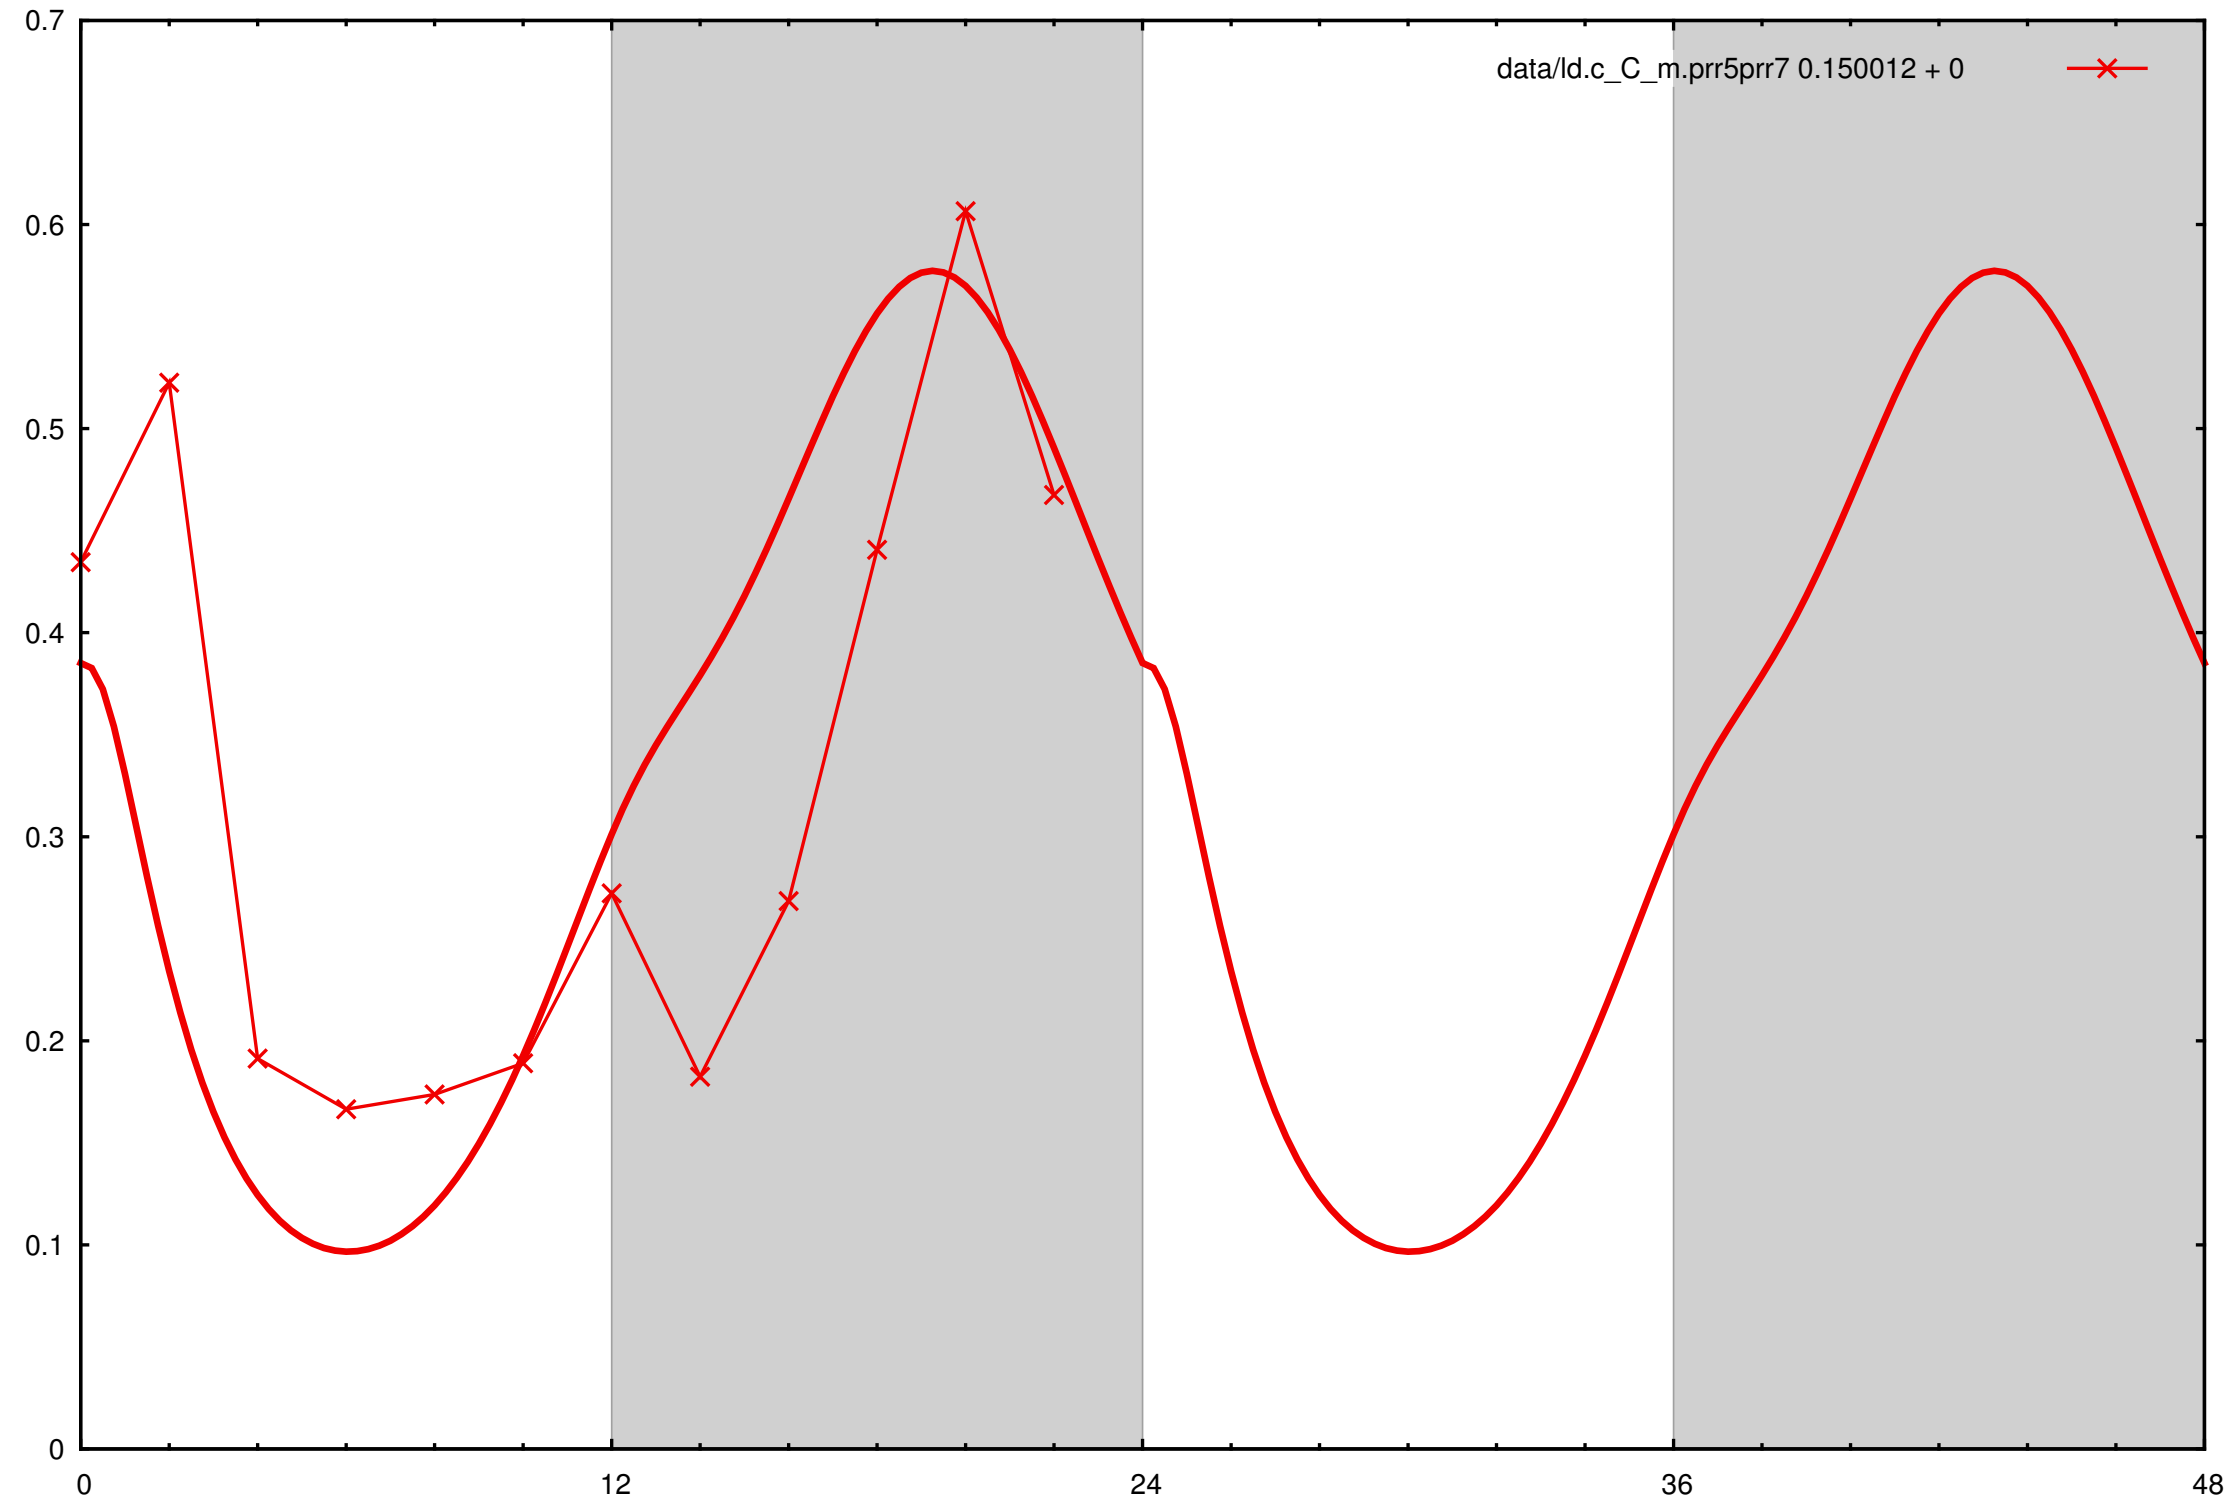



Scale group 361, scost 0

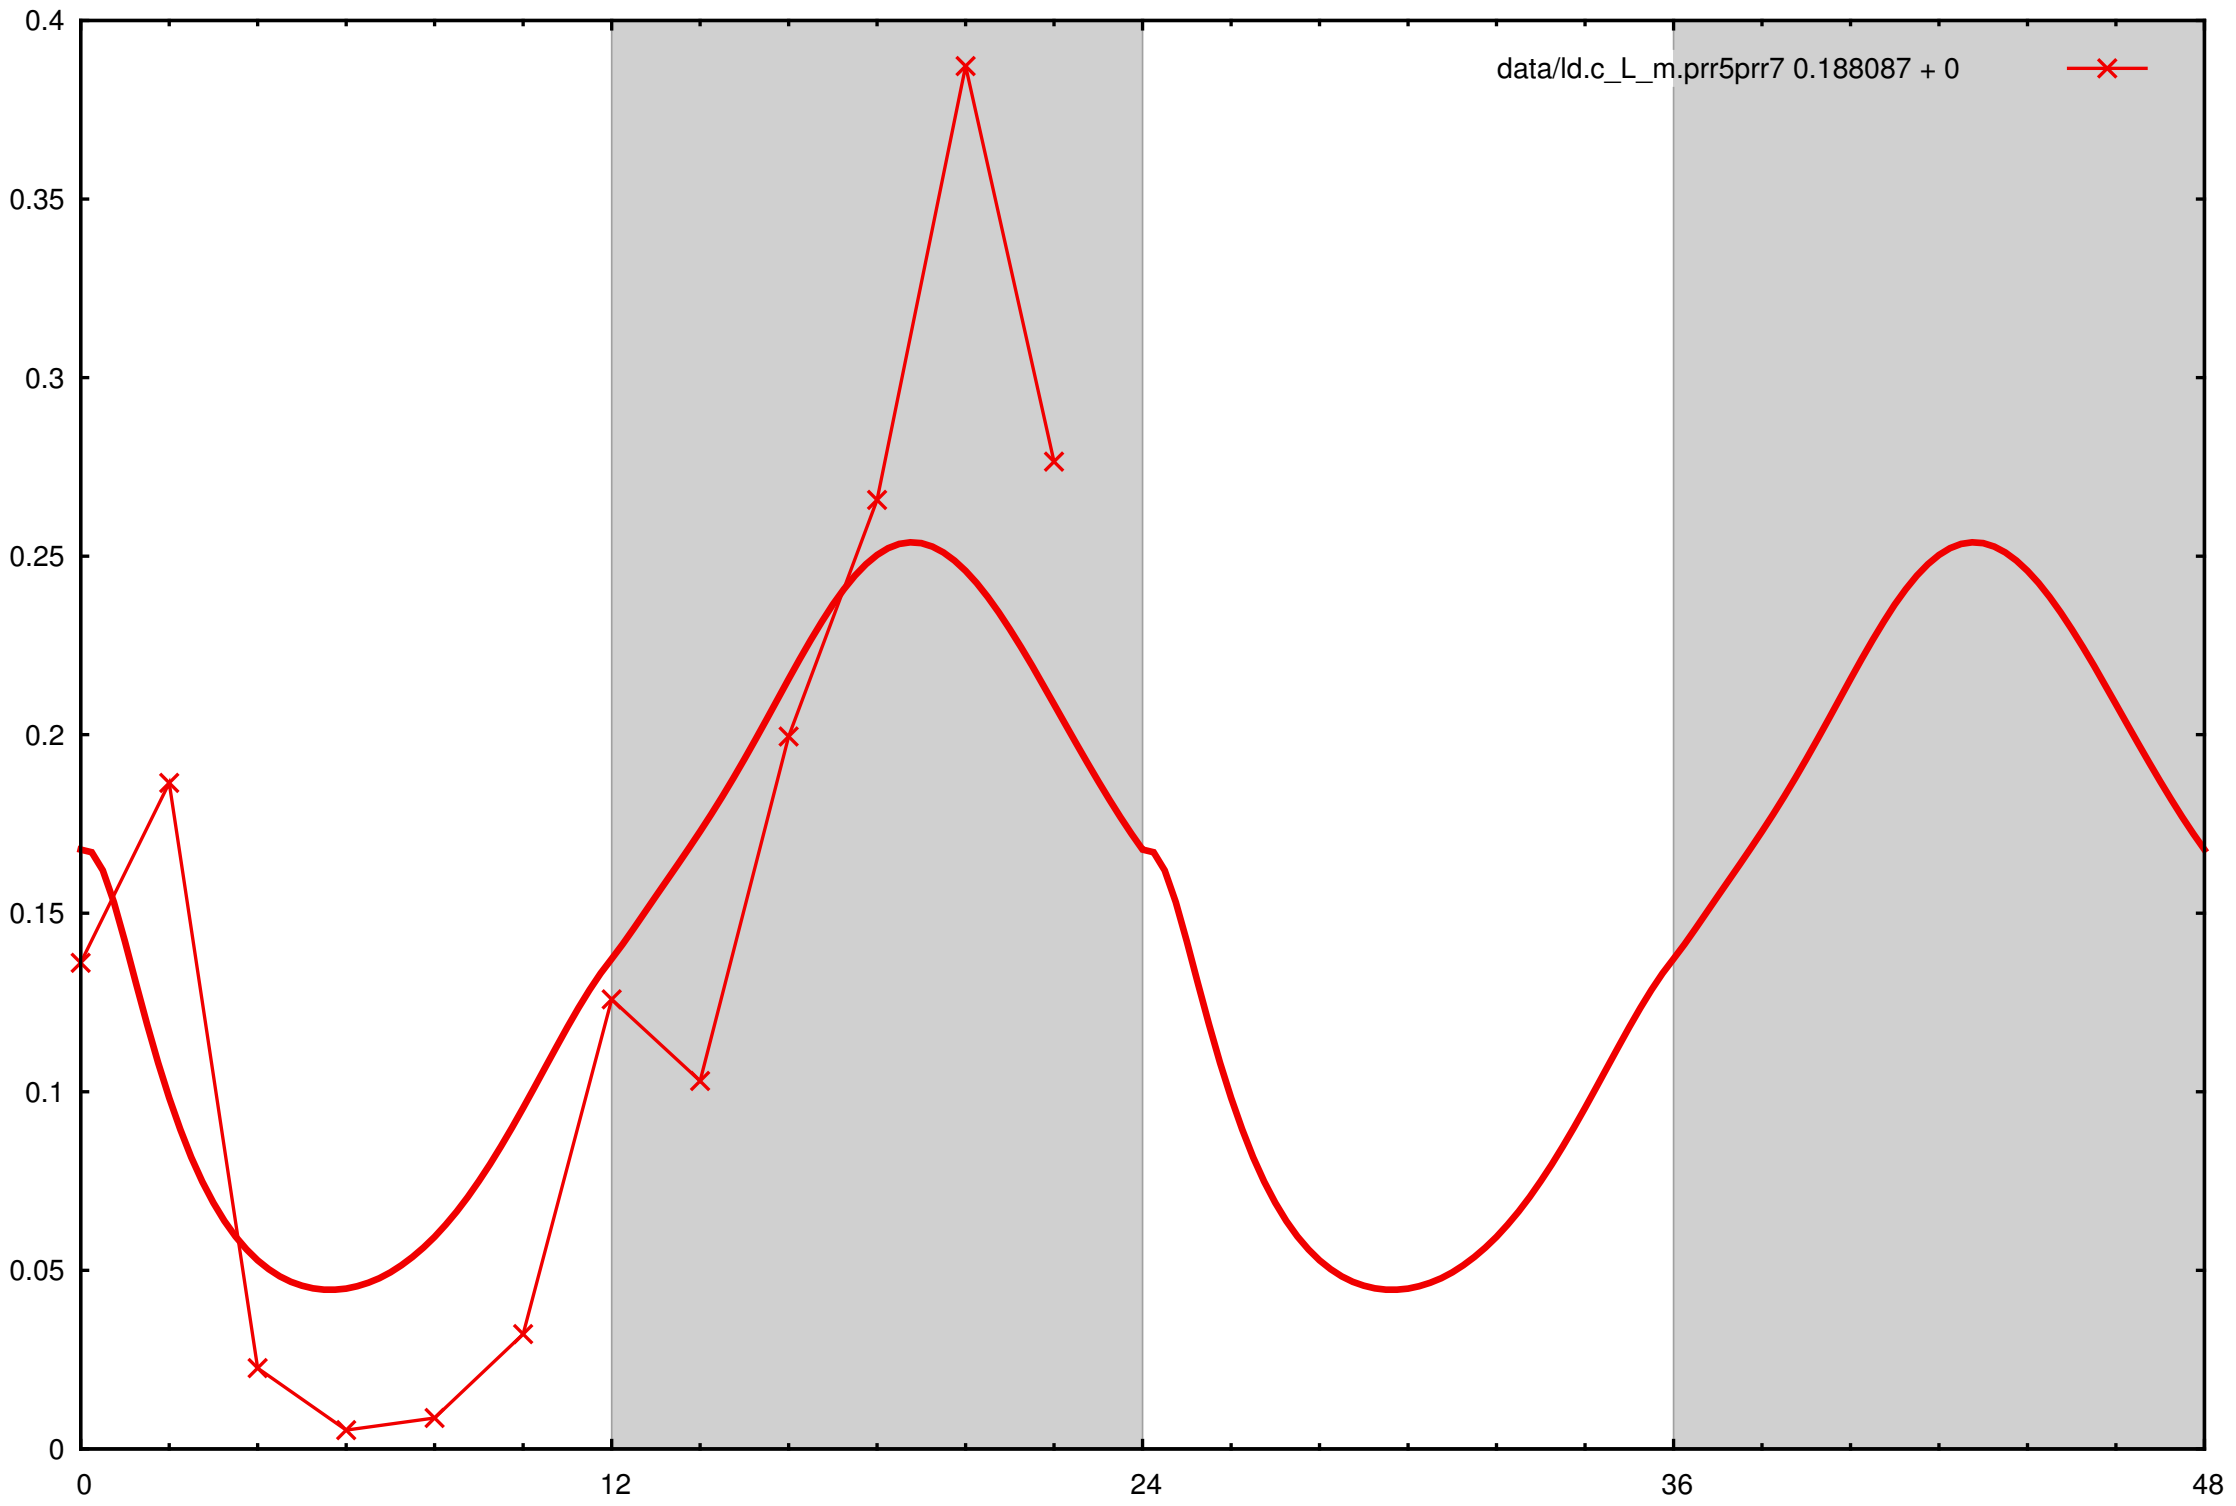

Scale group 362, scost 0

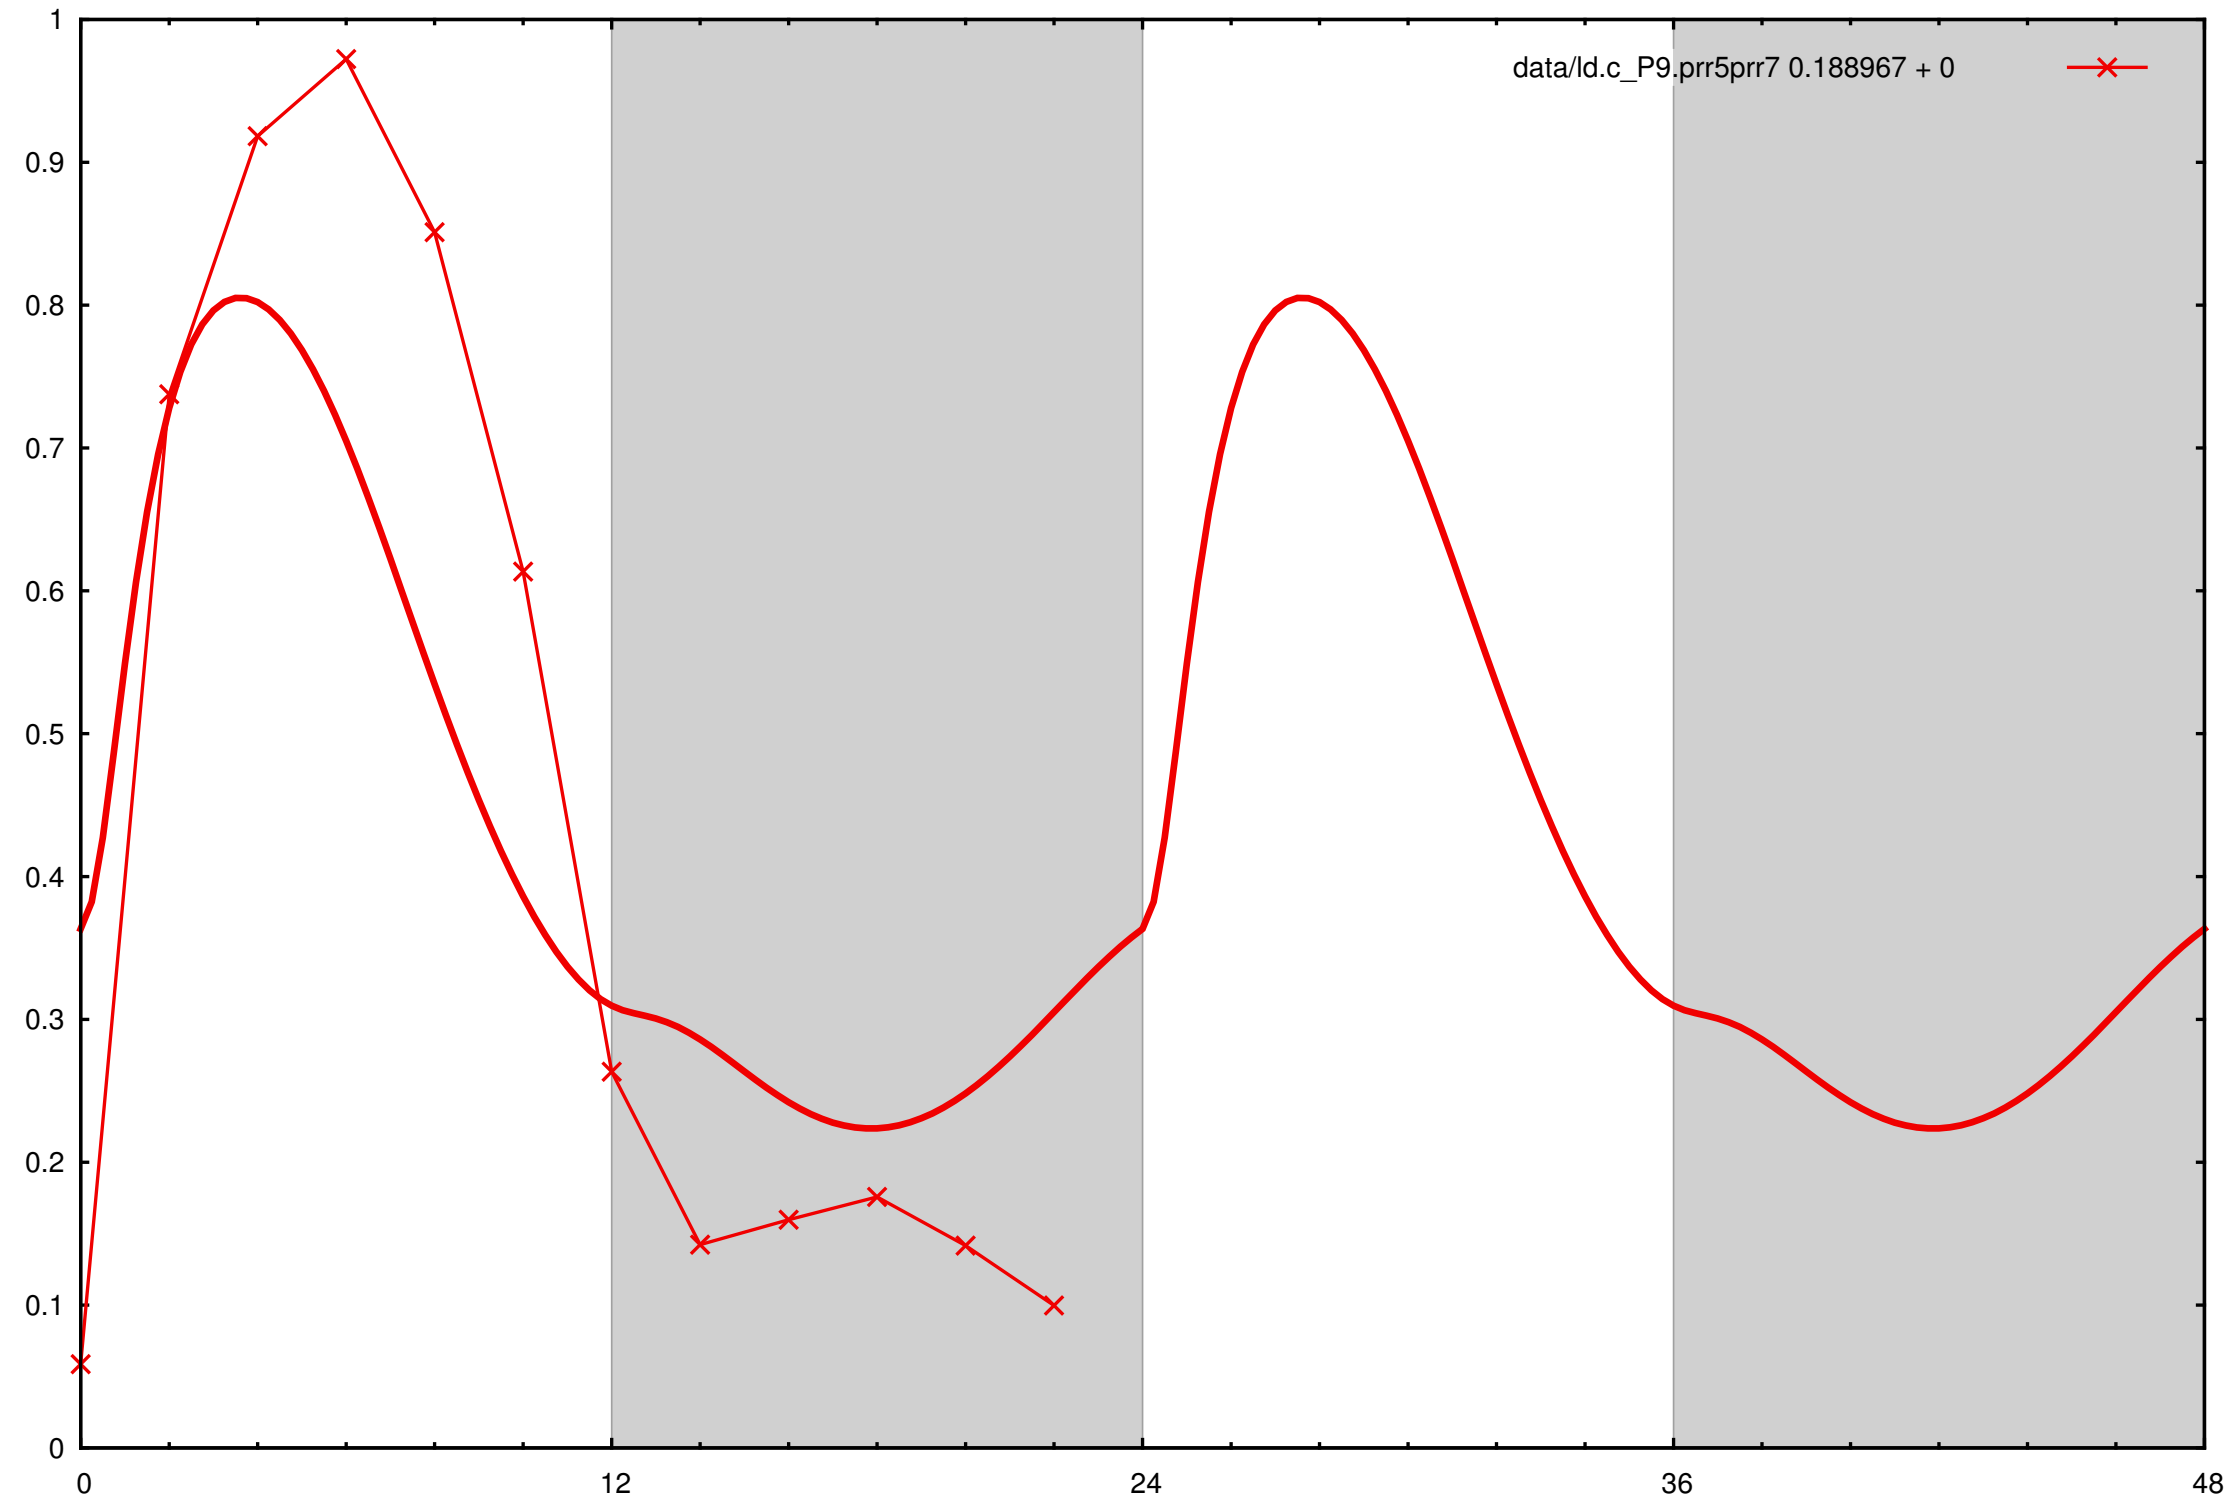

Scale group 363, scost 0

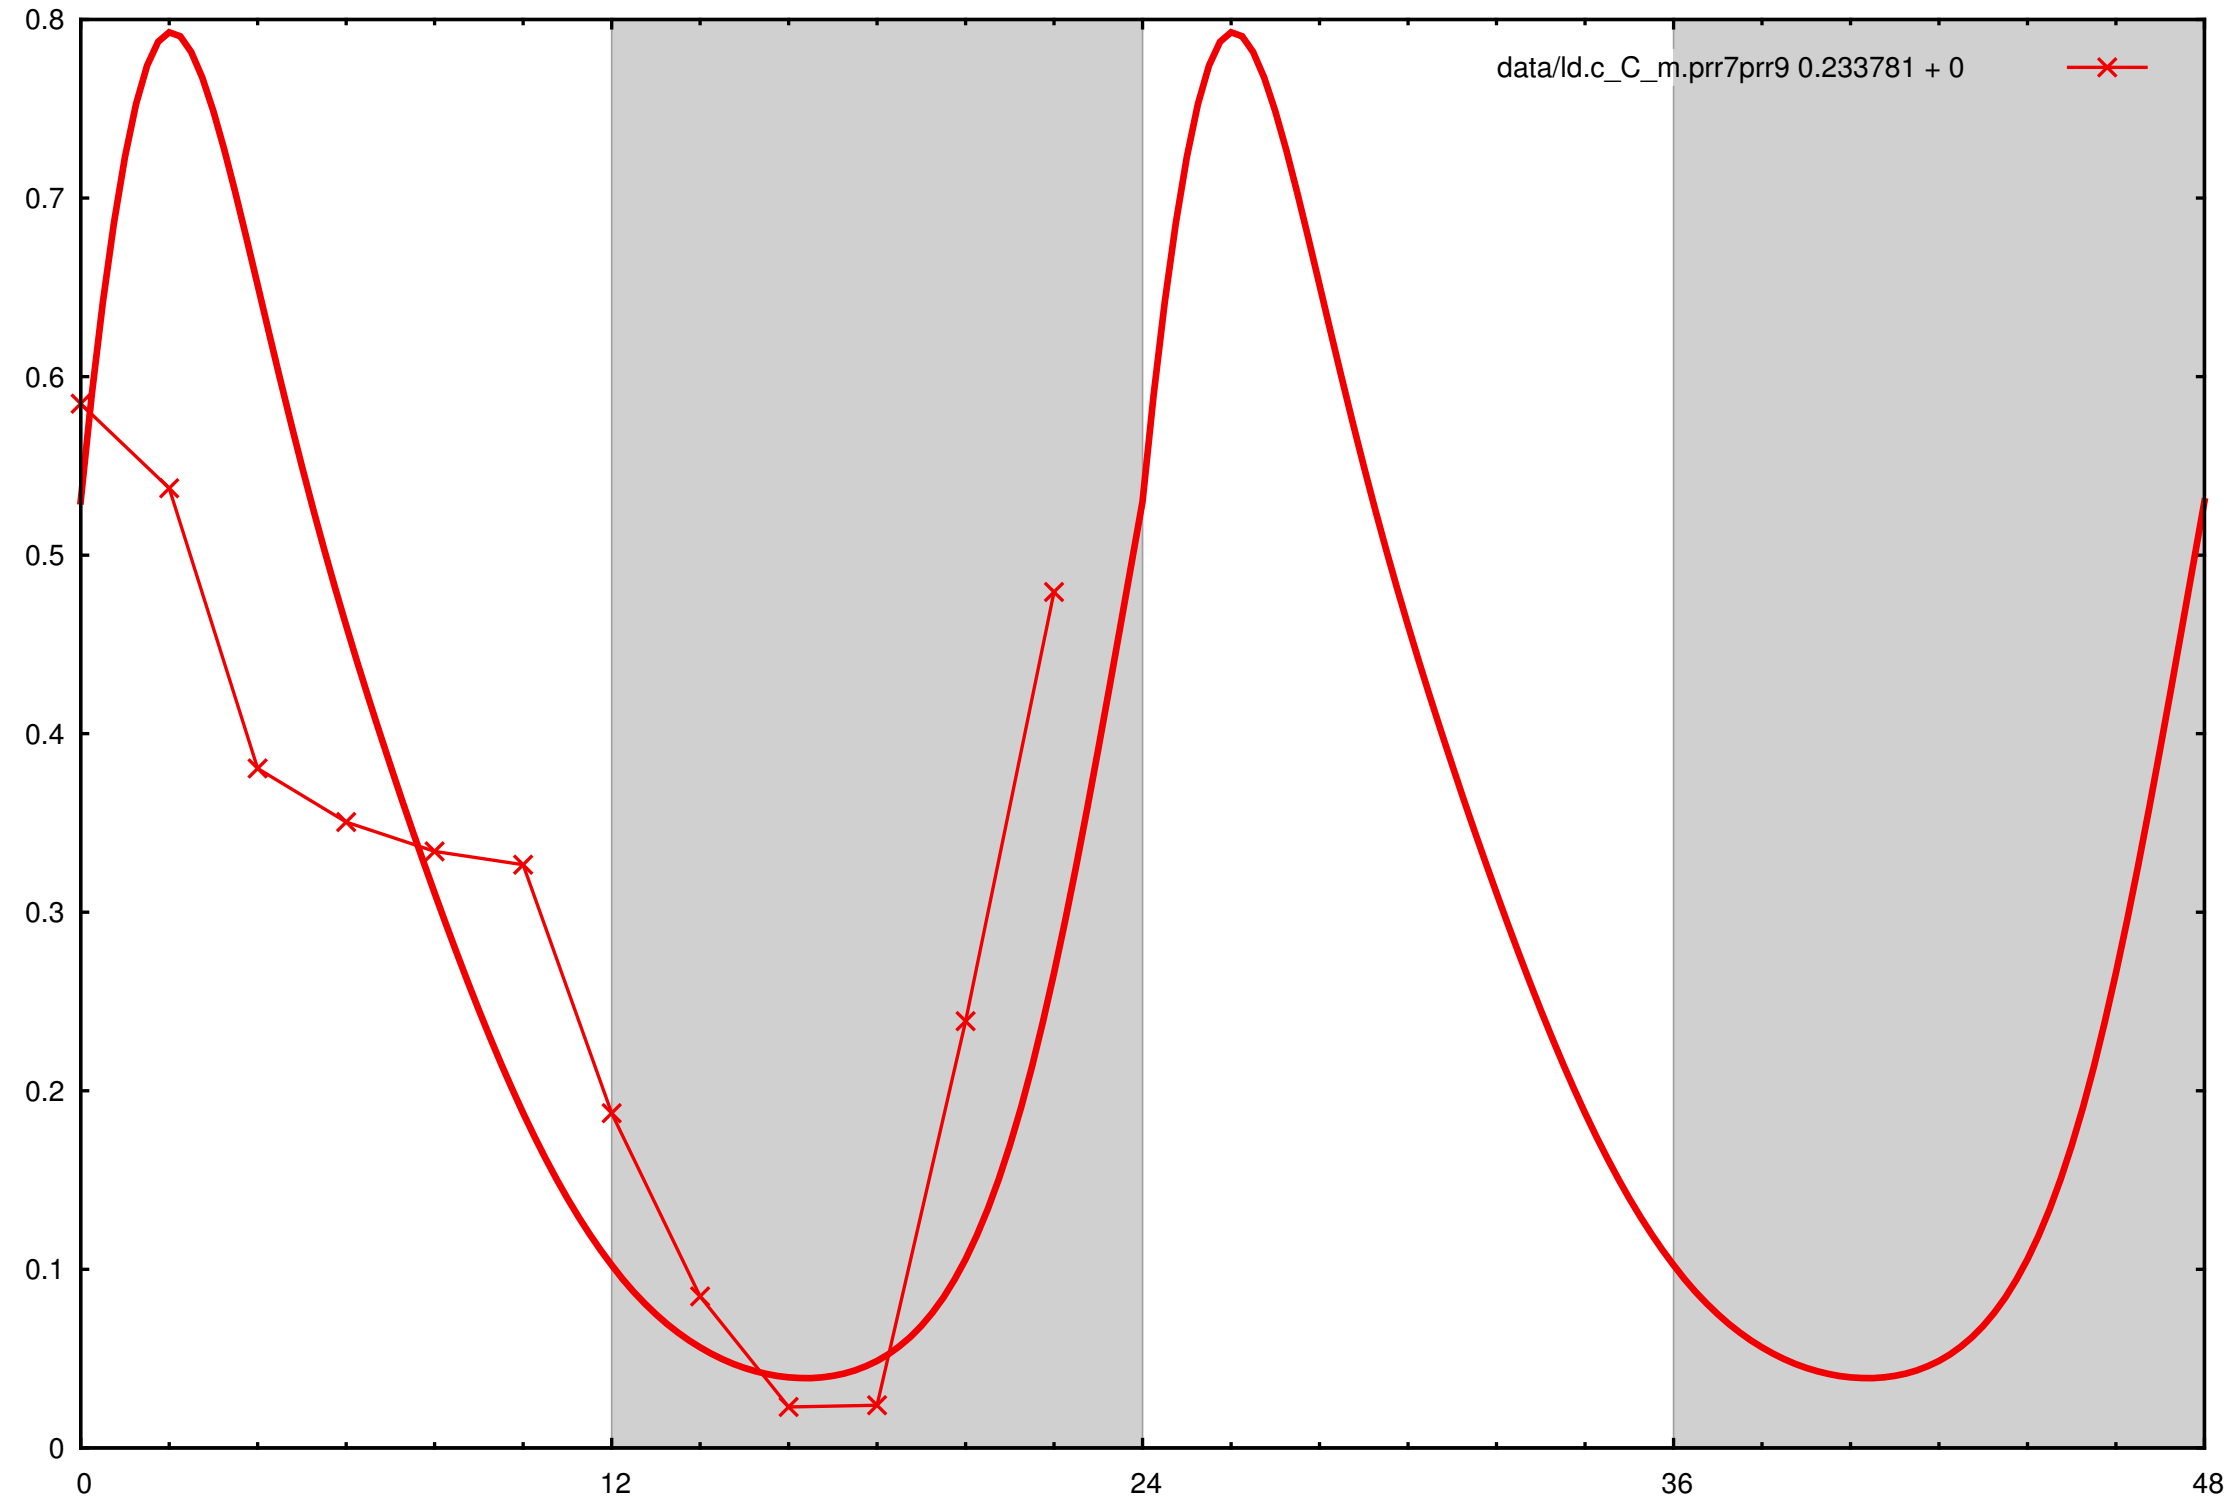

Scale group 364, scost 0

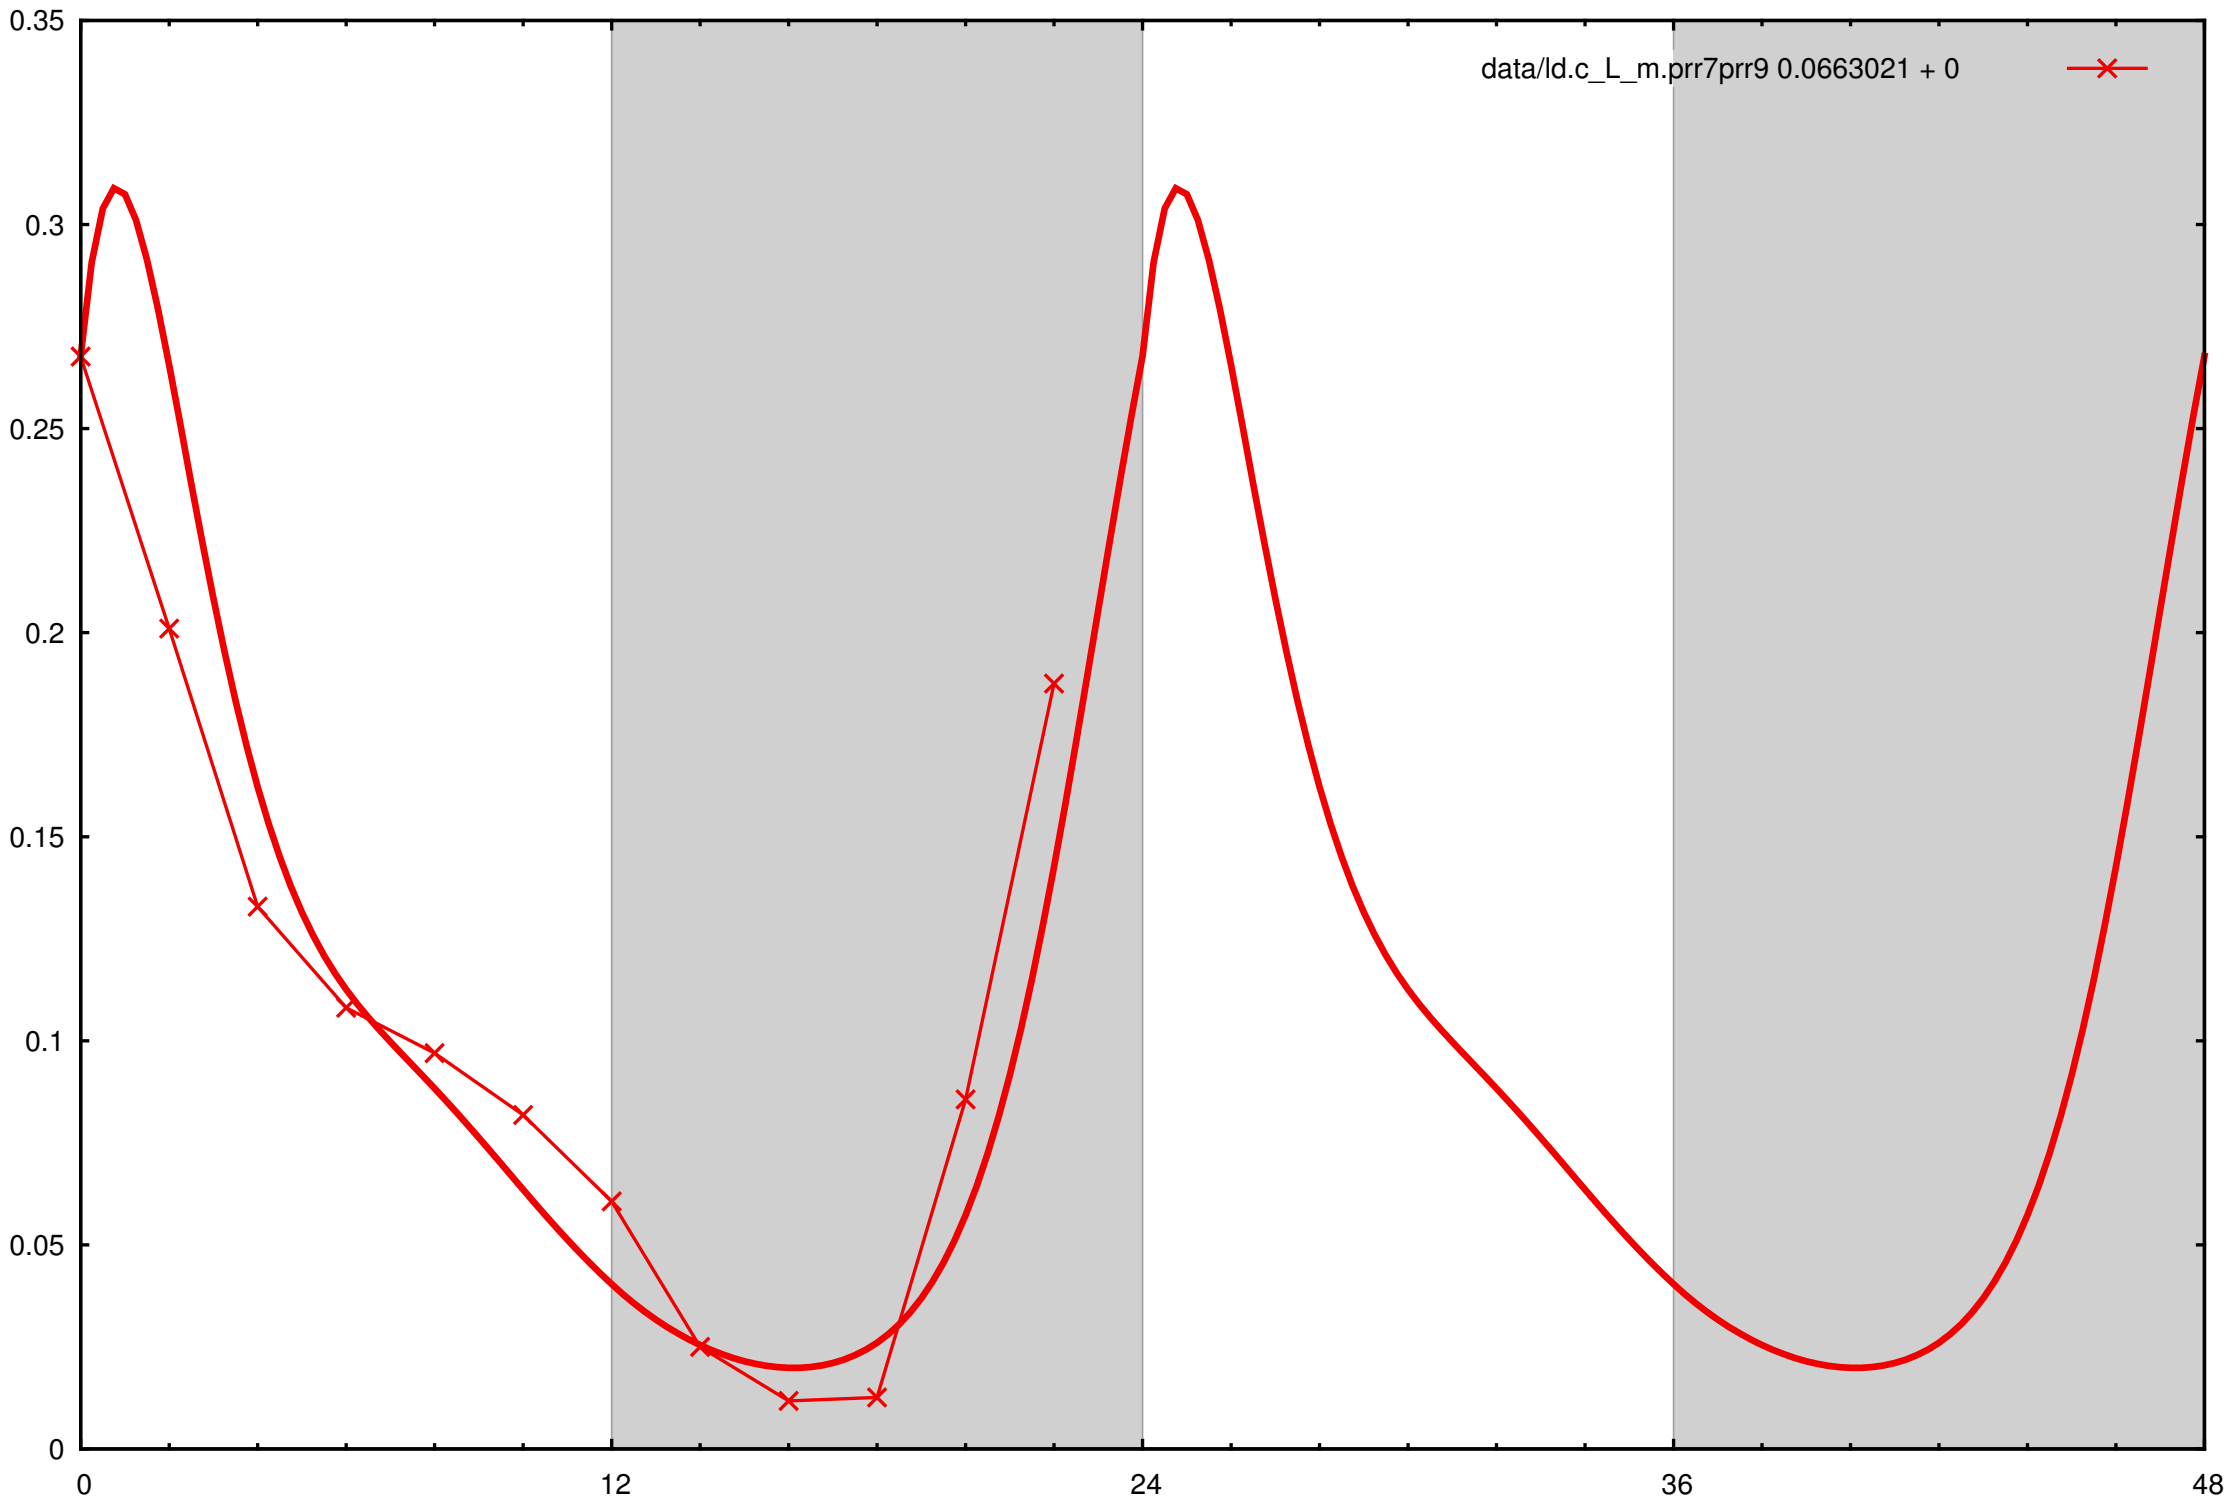

Scale group 365, scost 0

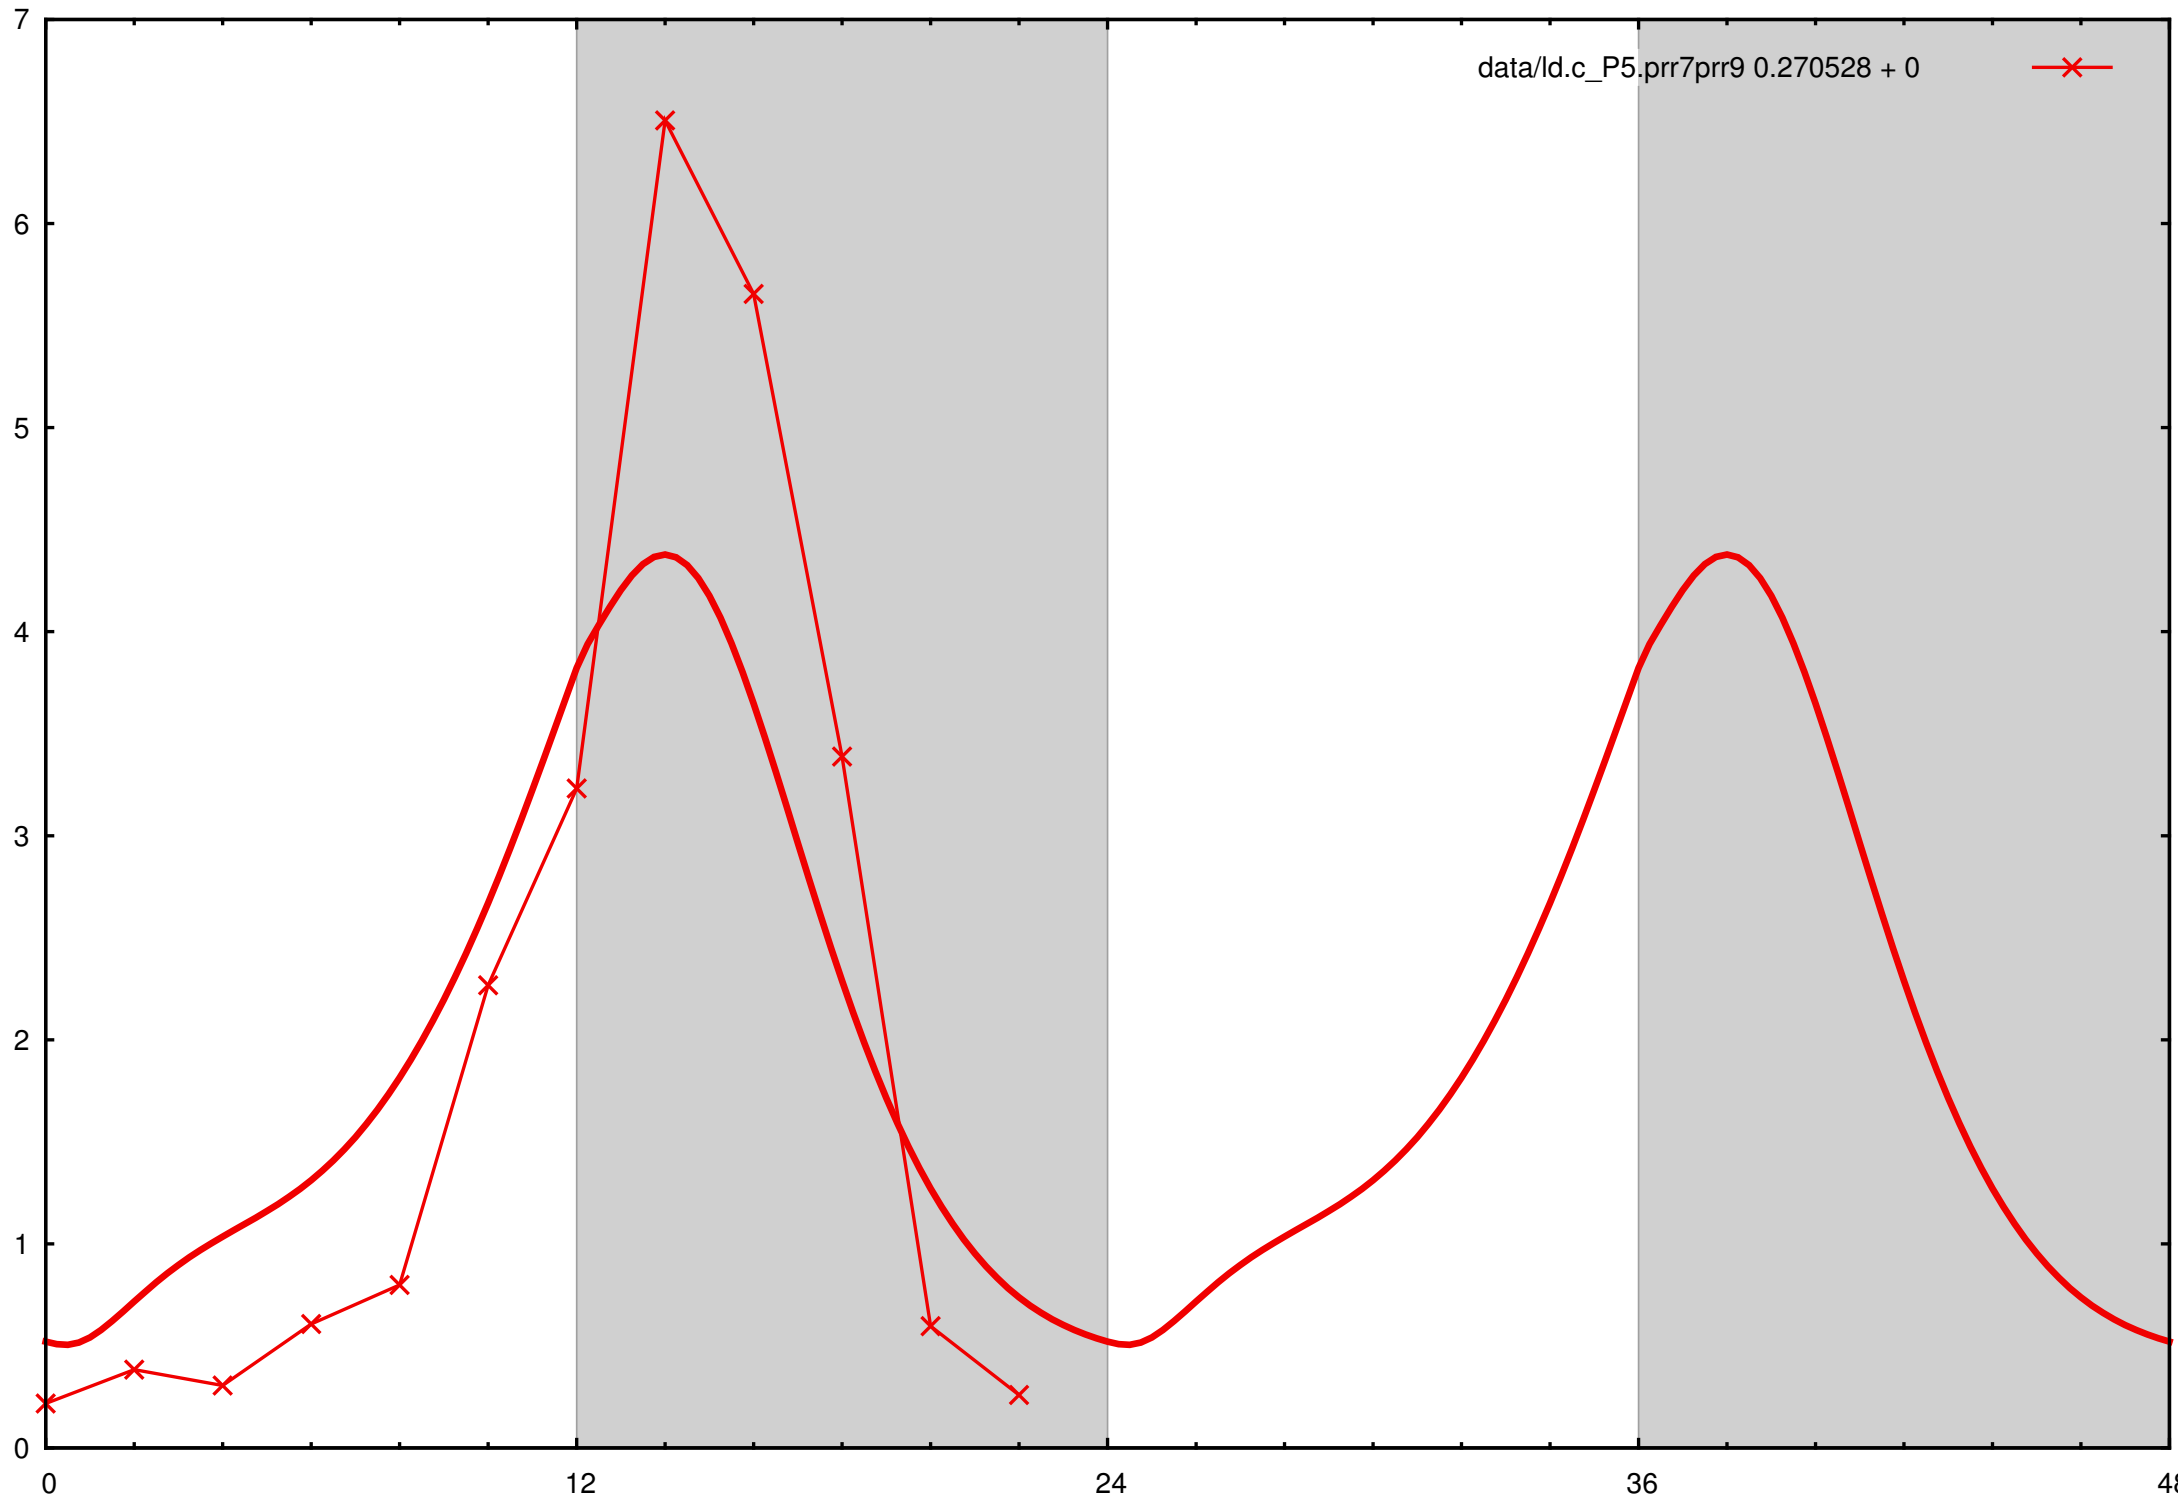

Scale group 366, scost 0

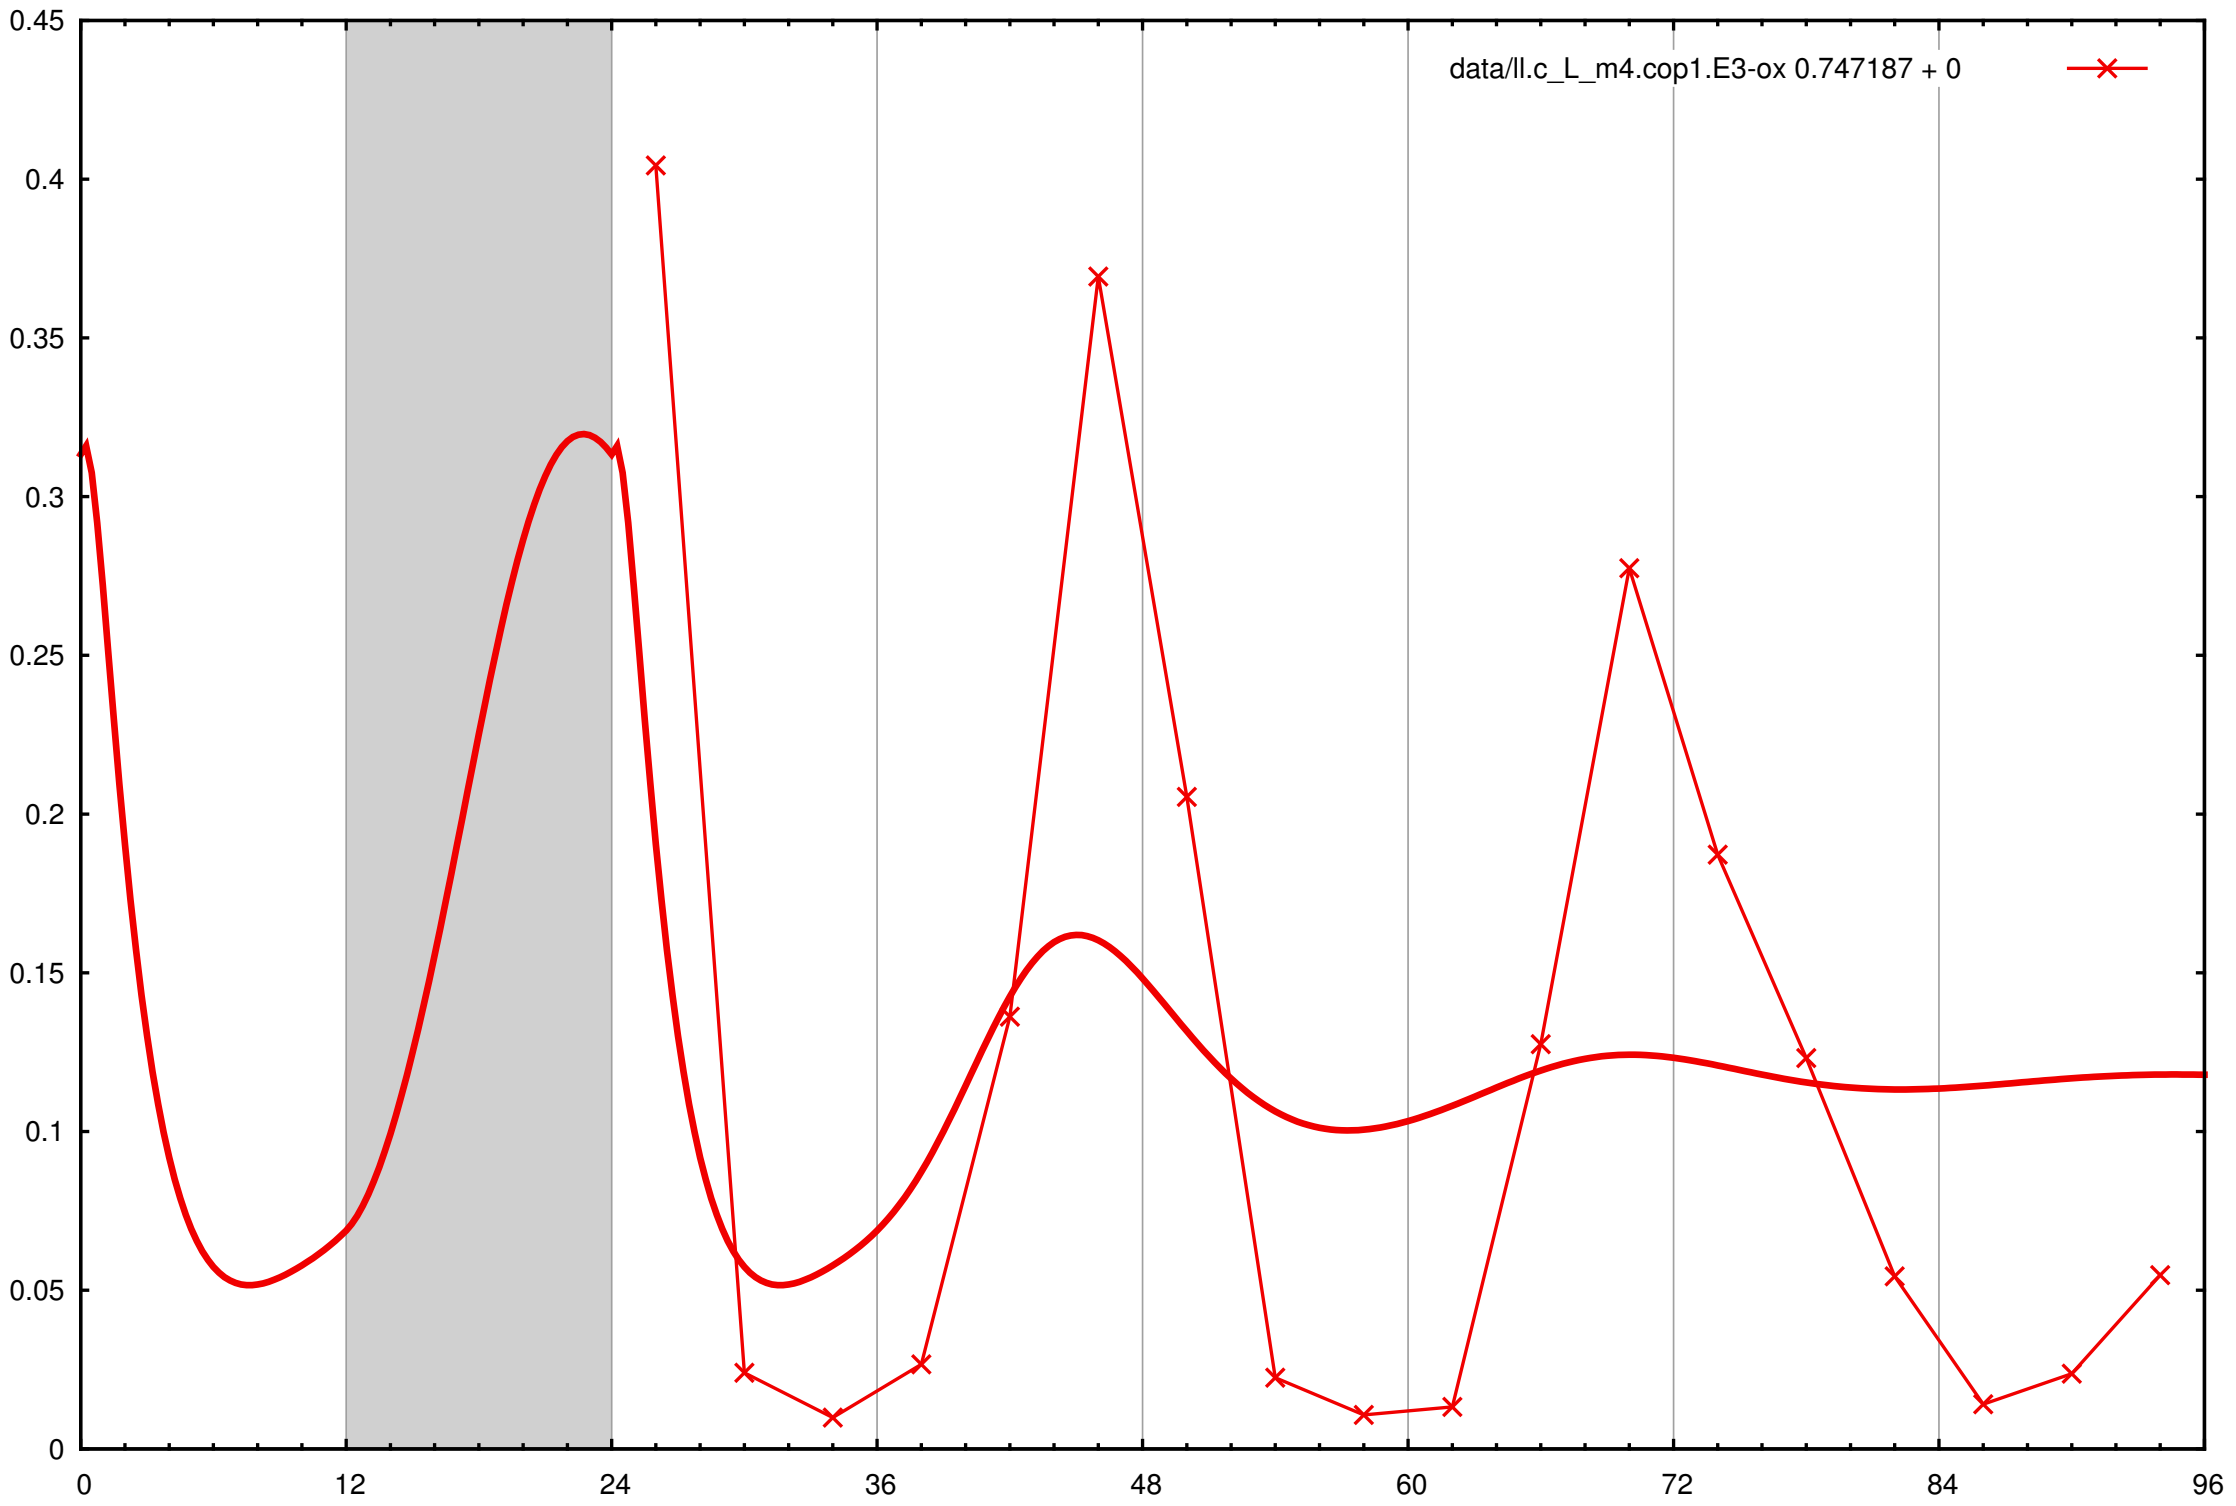

Scale group 367, scost 0

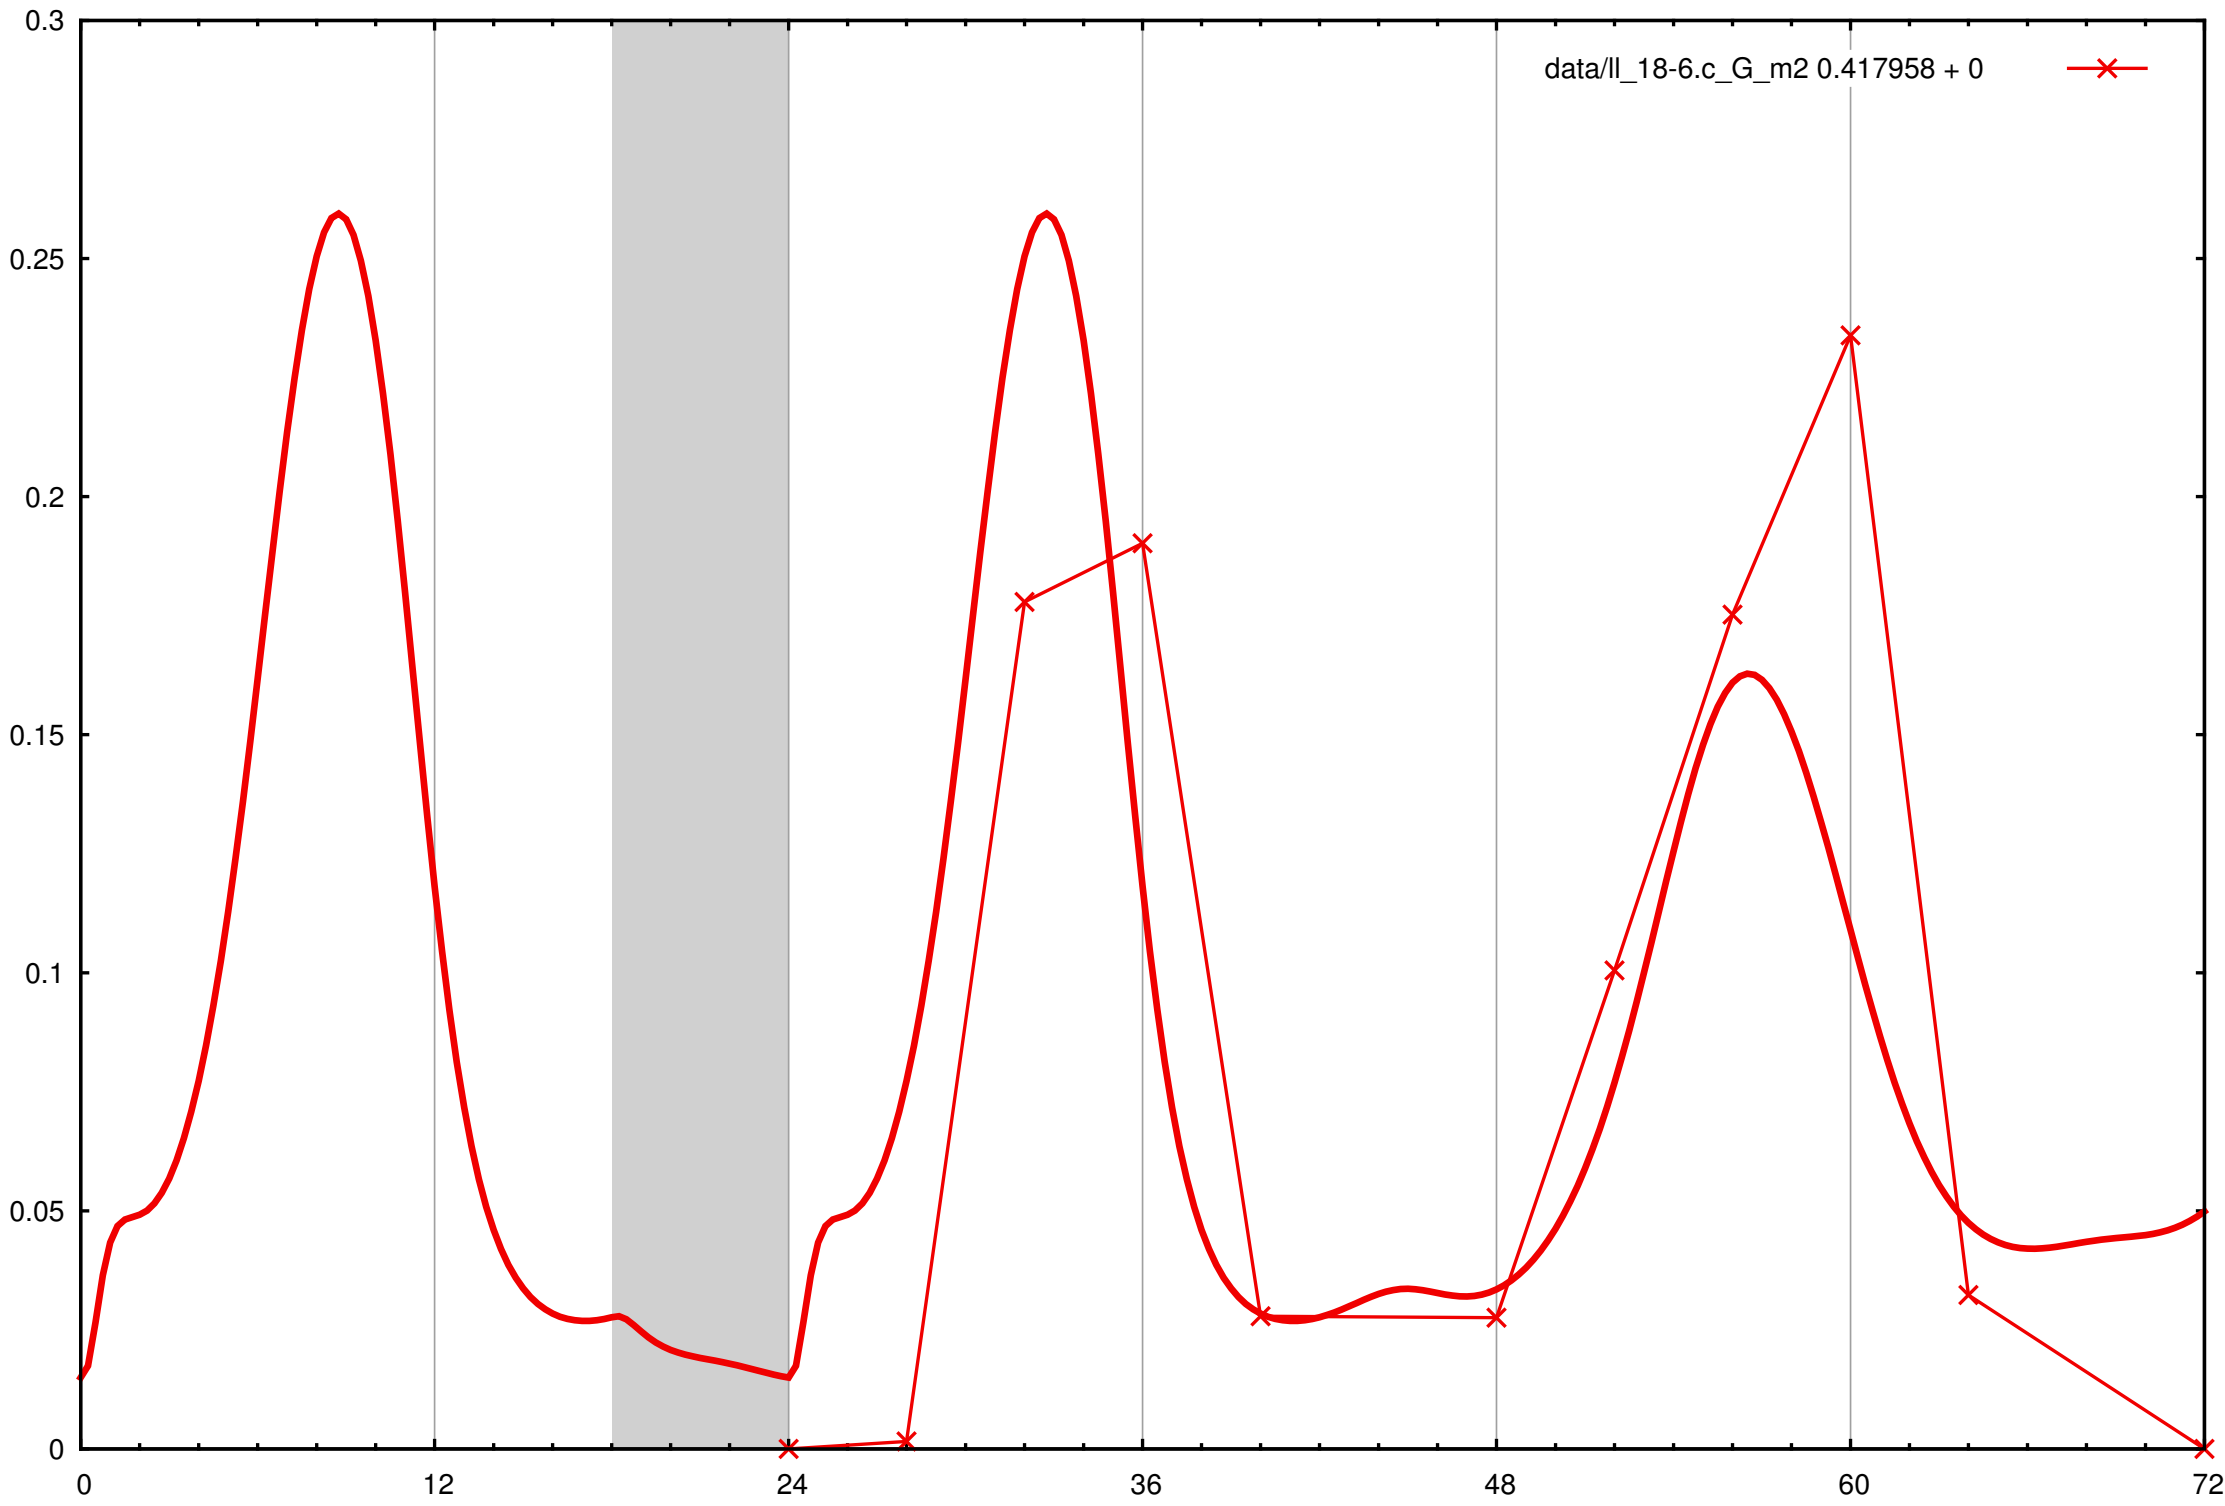

Scale group 368, scost 0

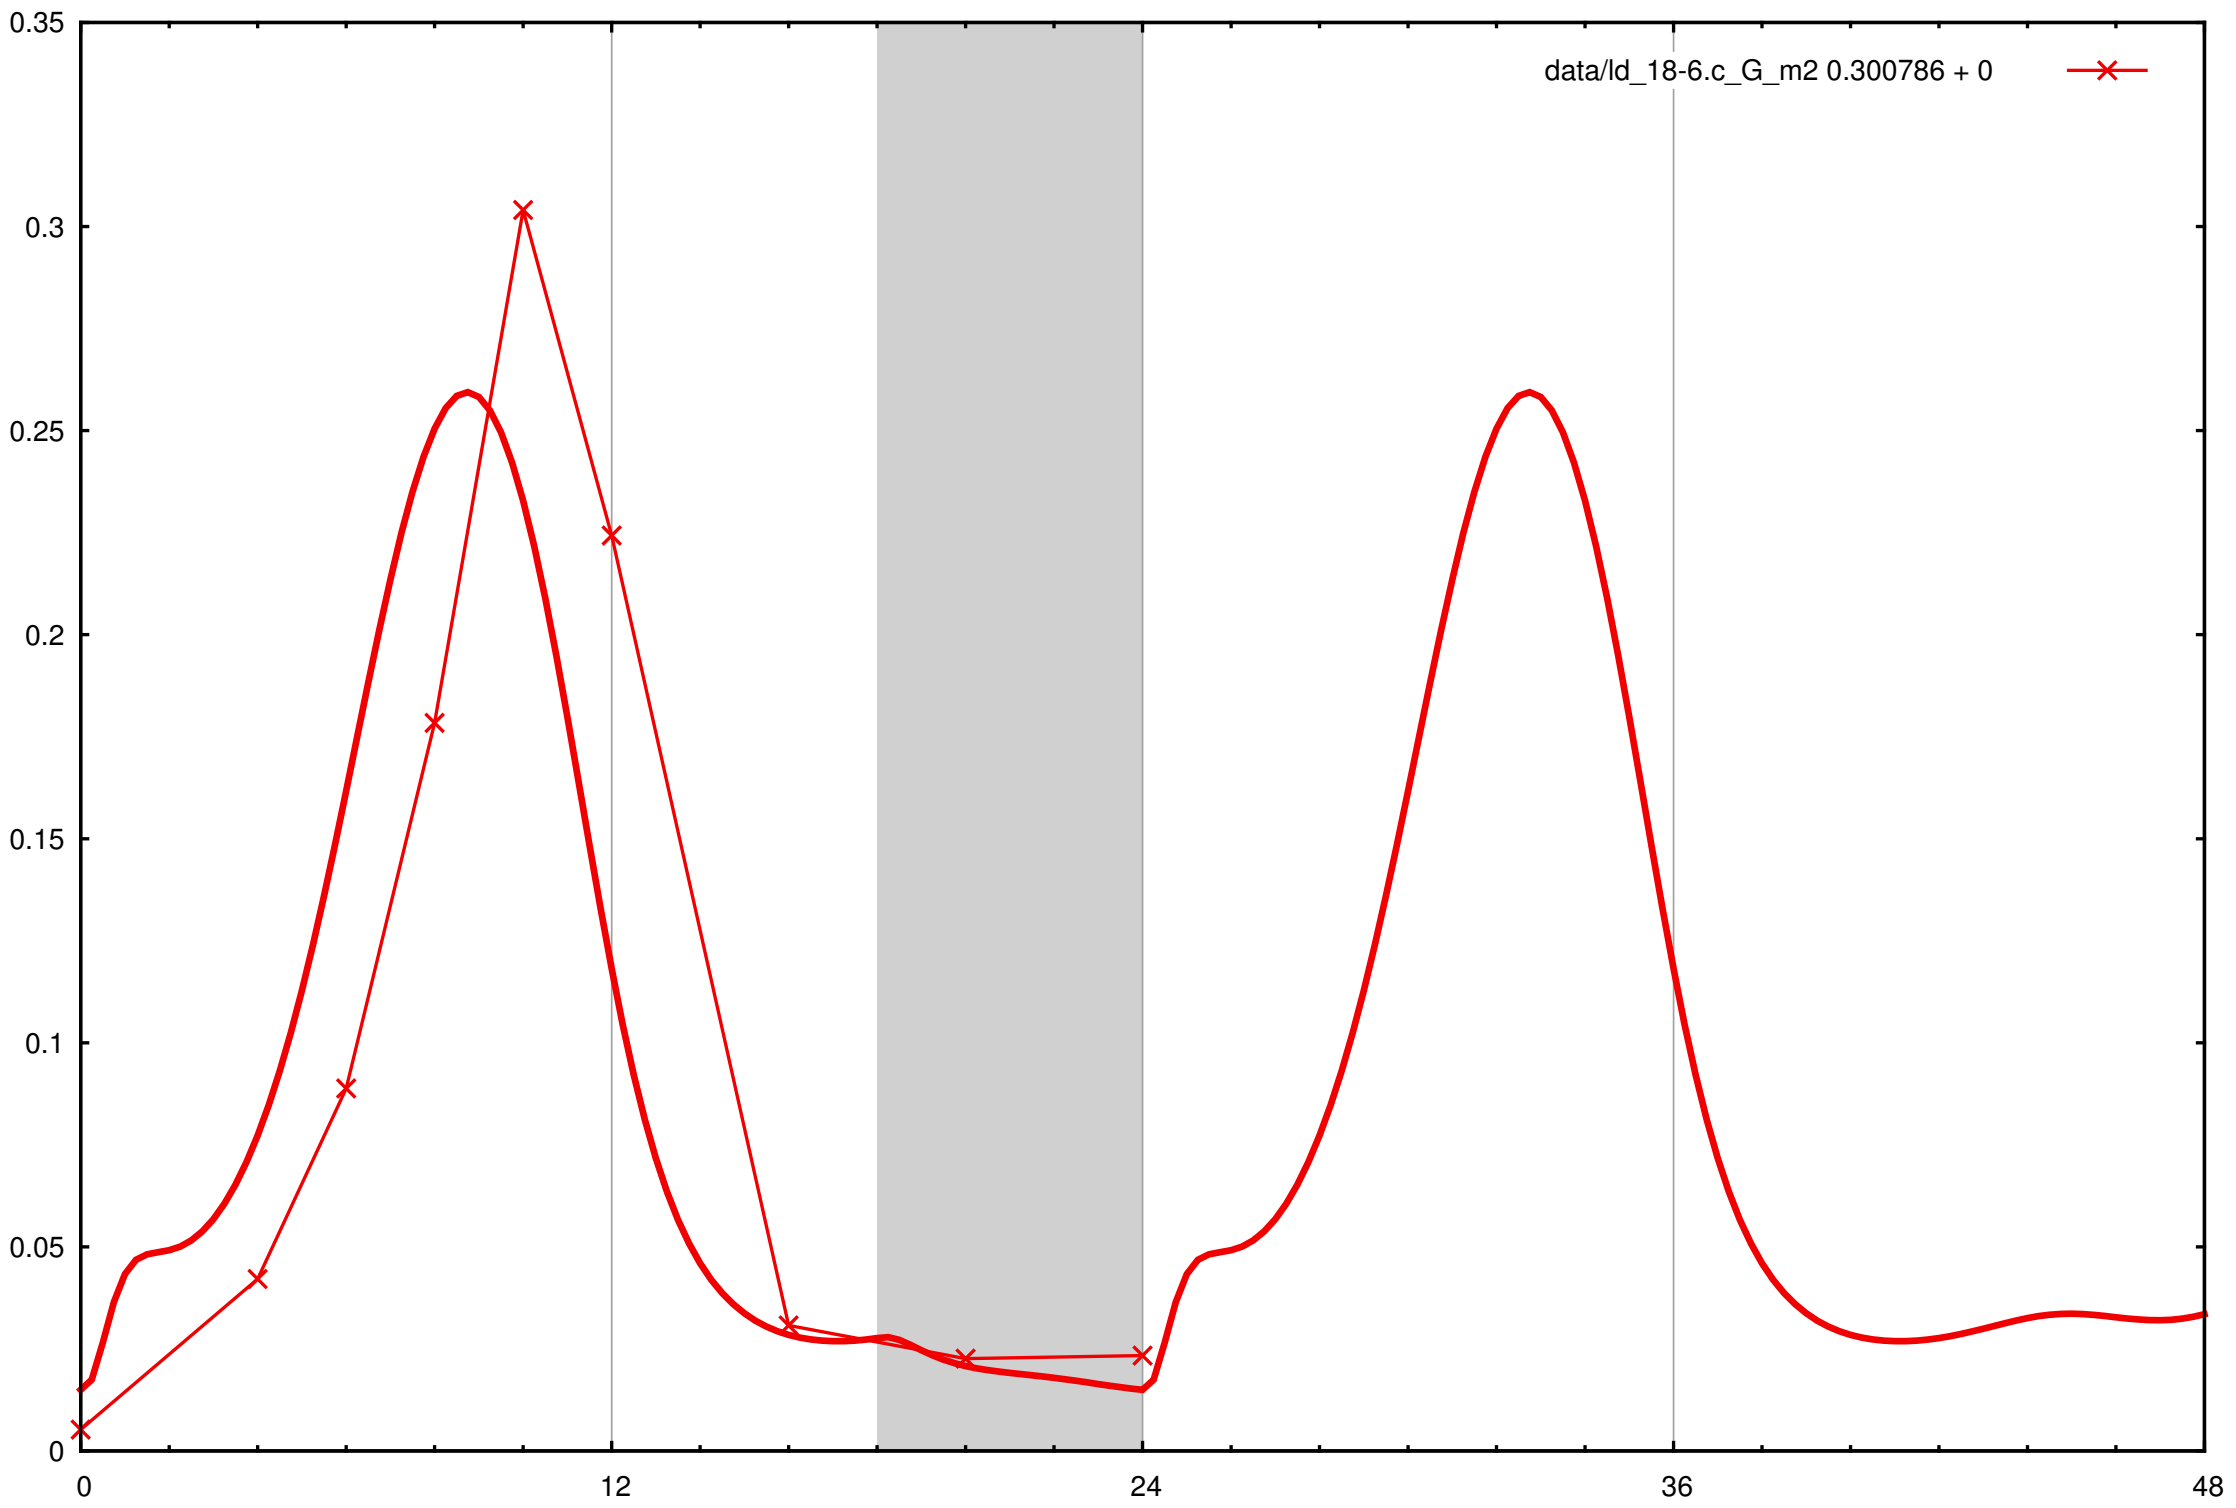



Scale group 369, scost 0

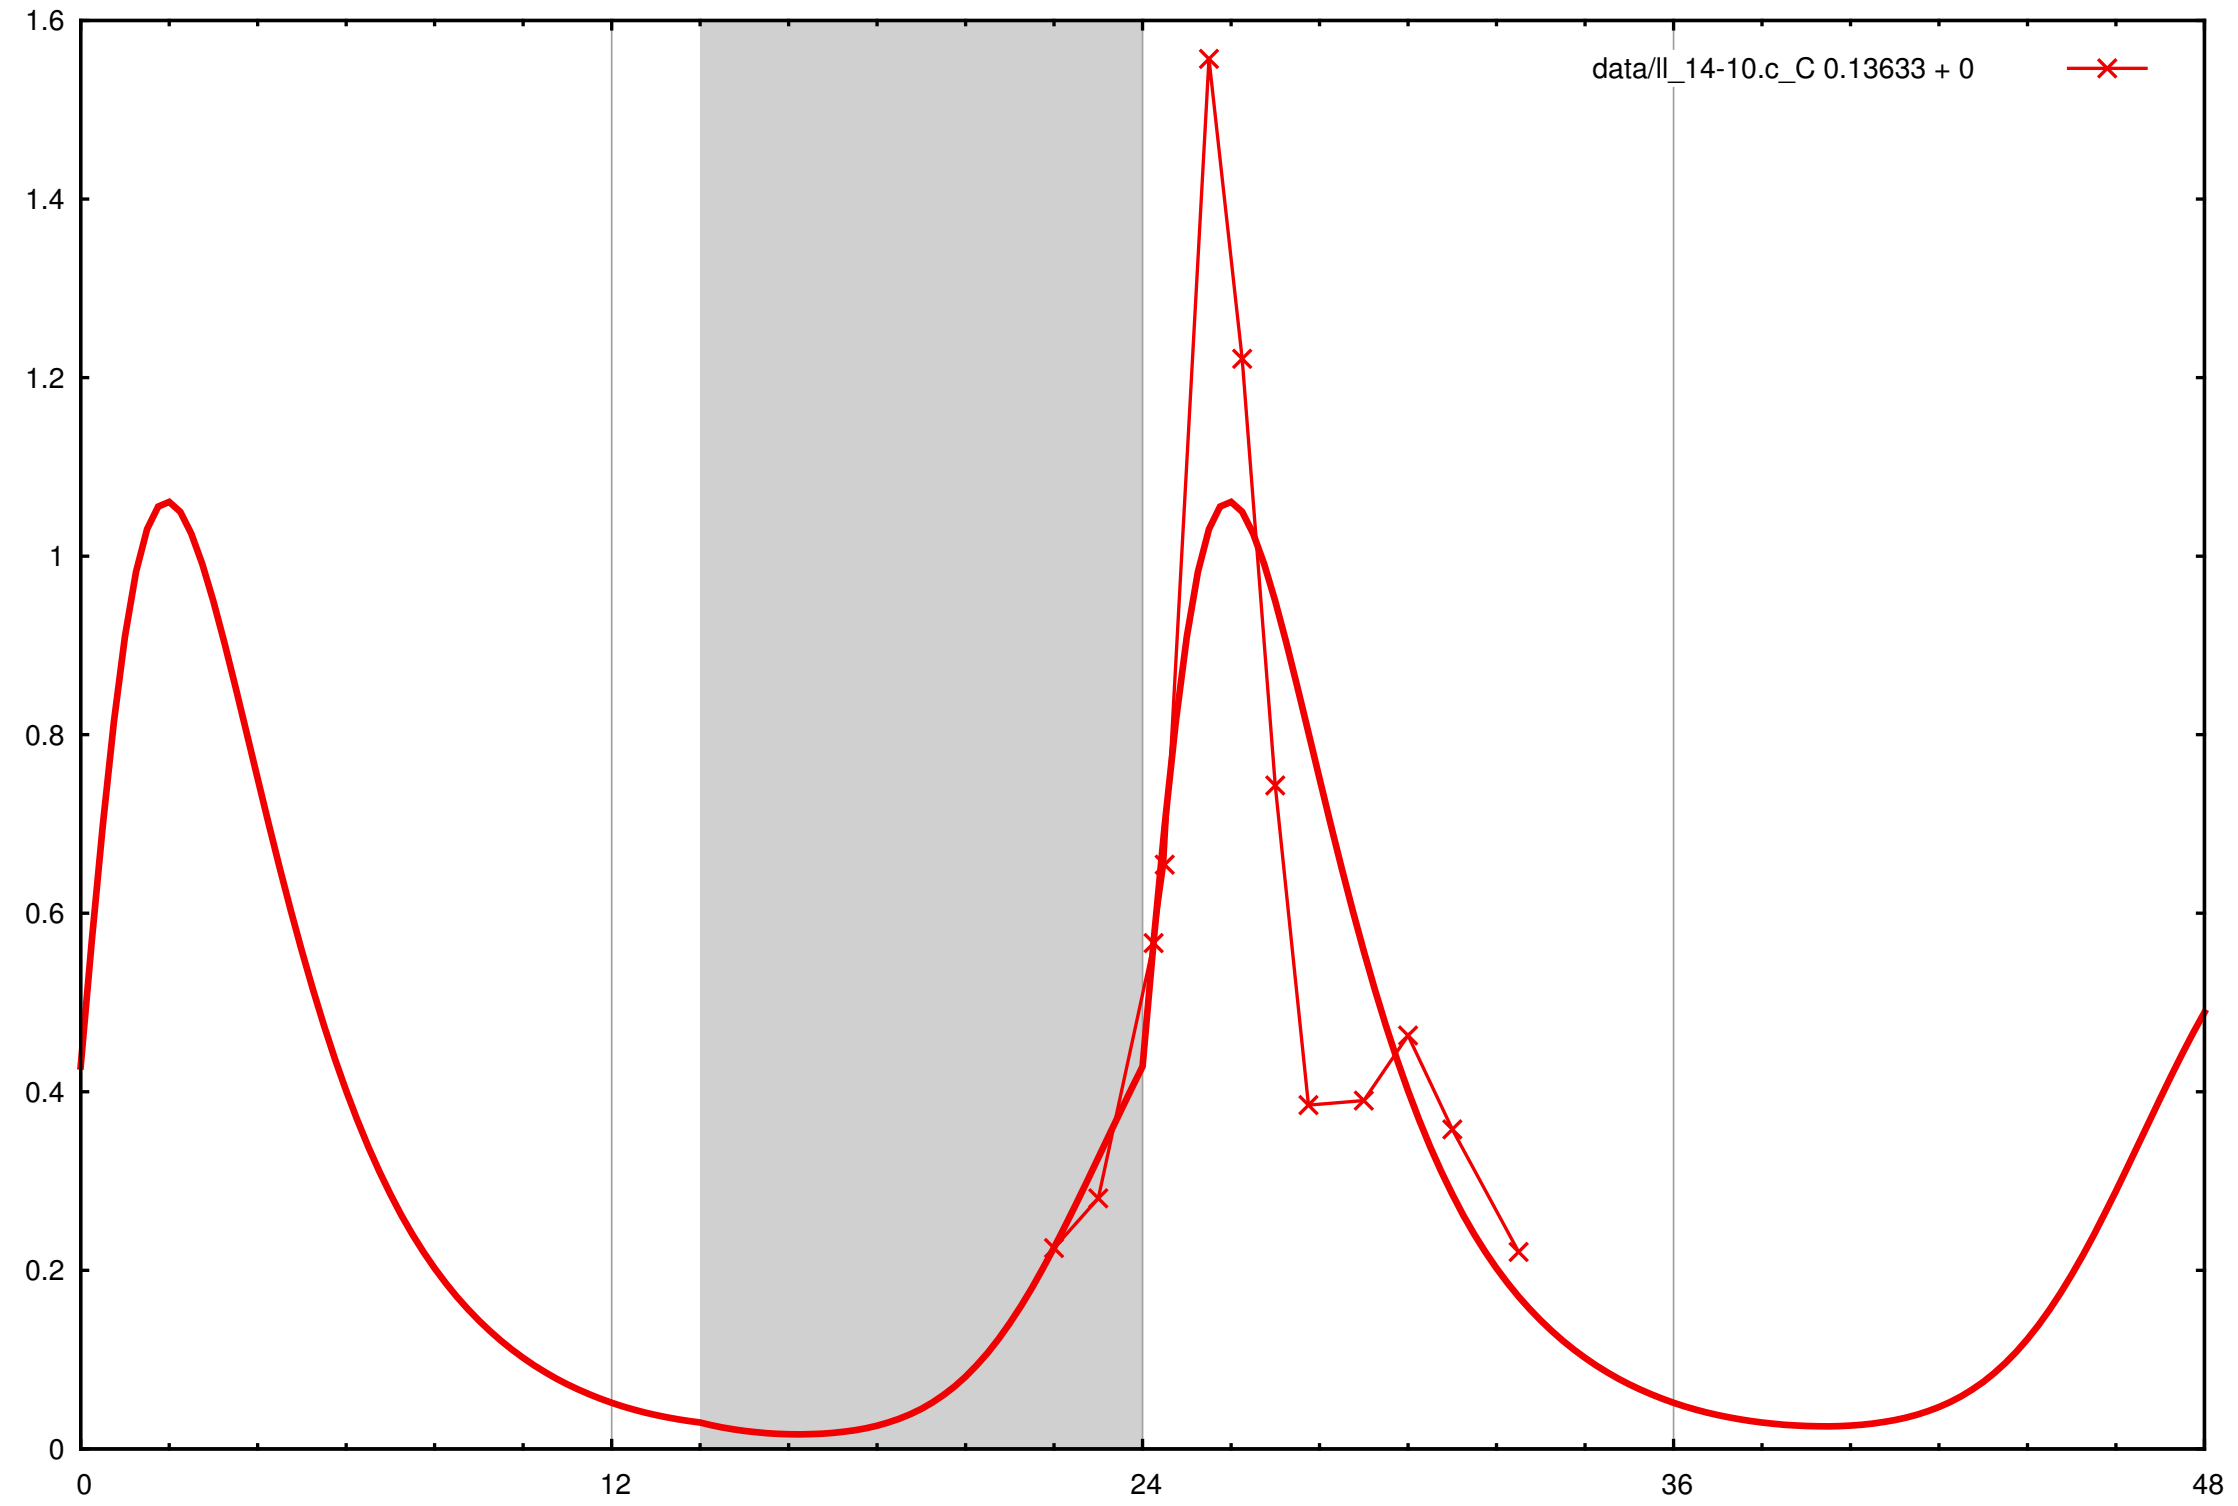

Scale group 370, scost 0

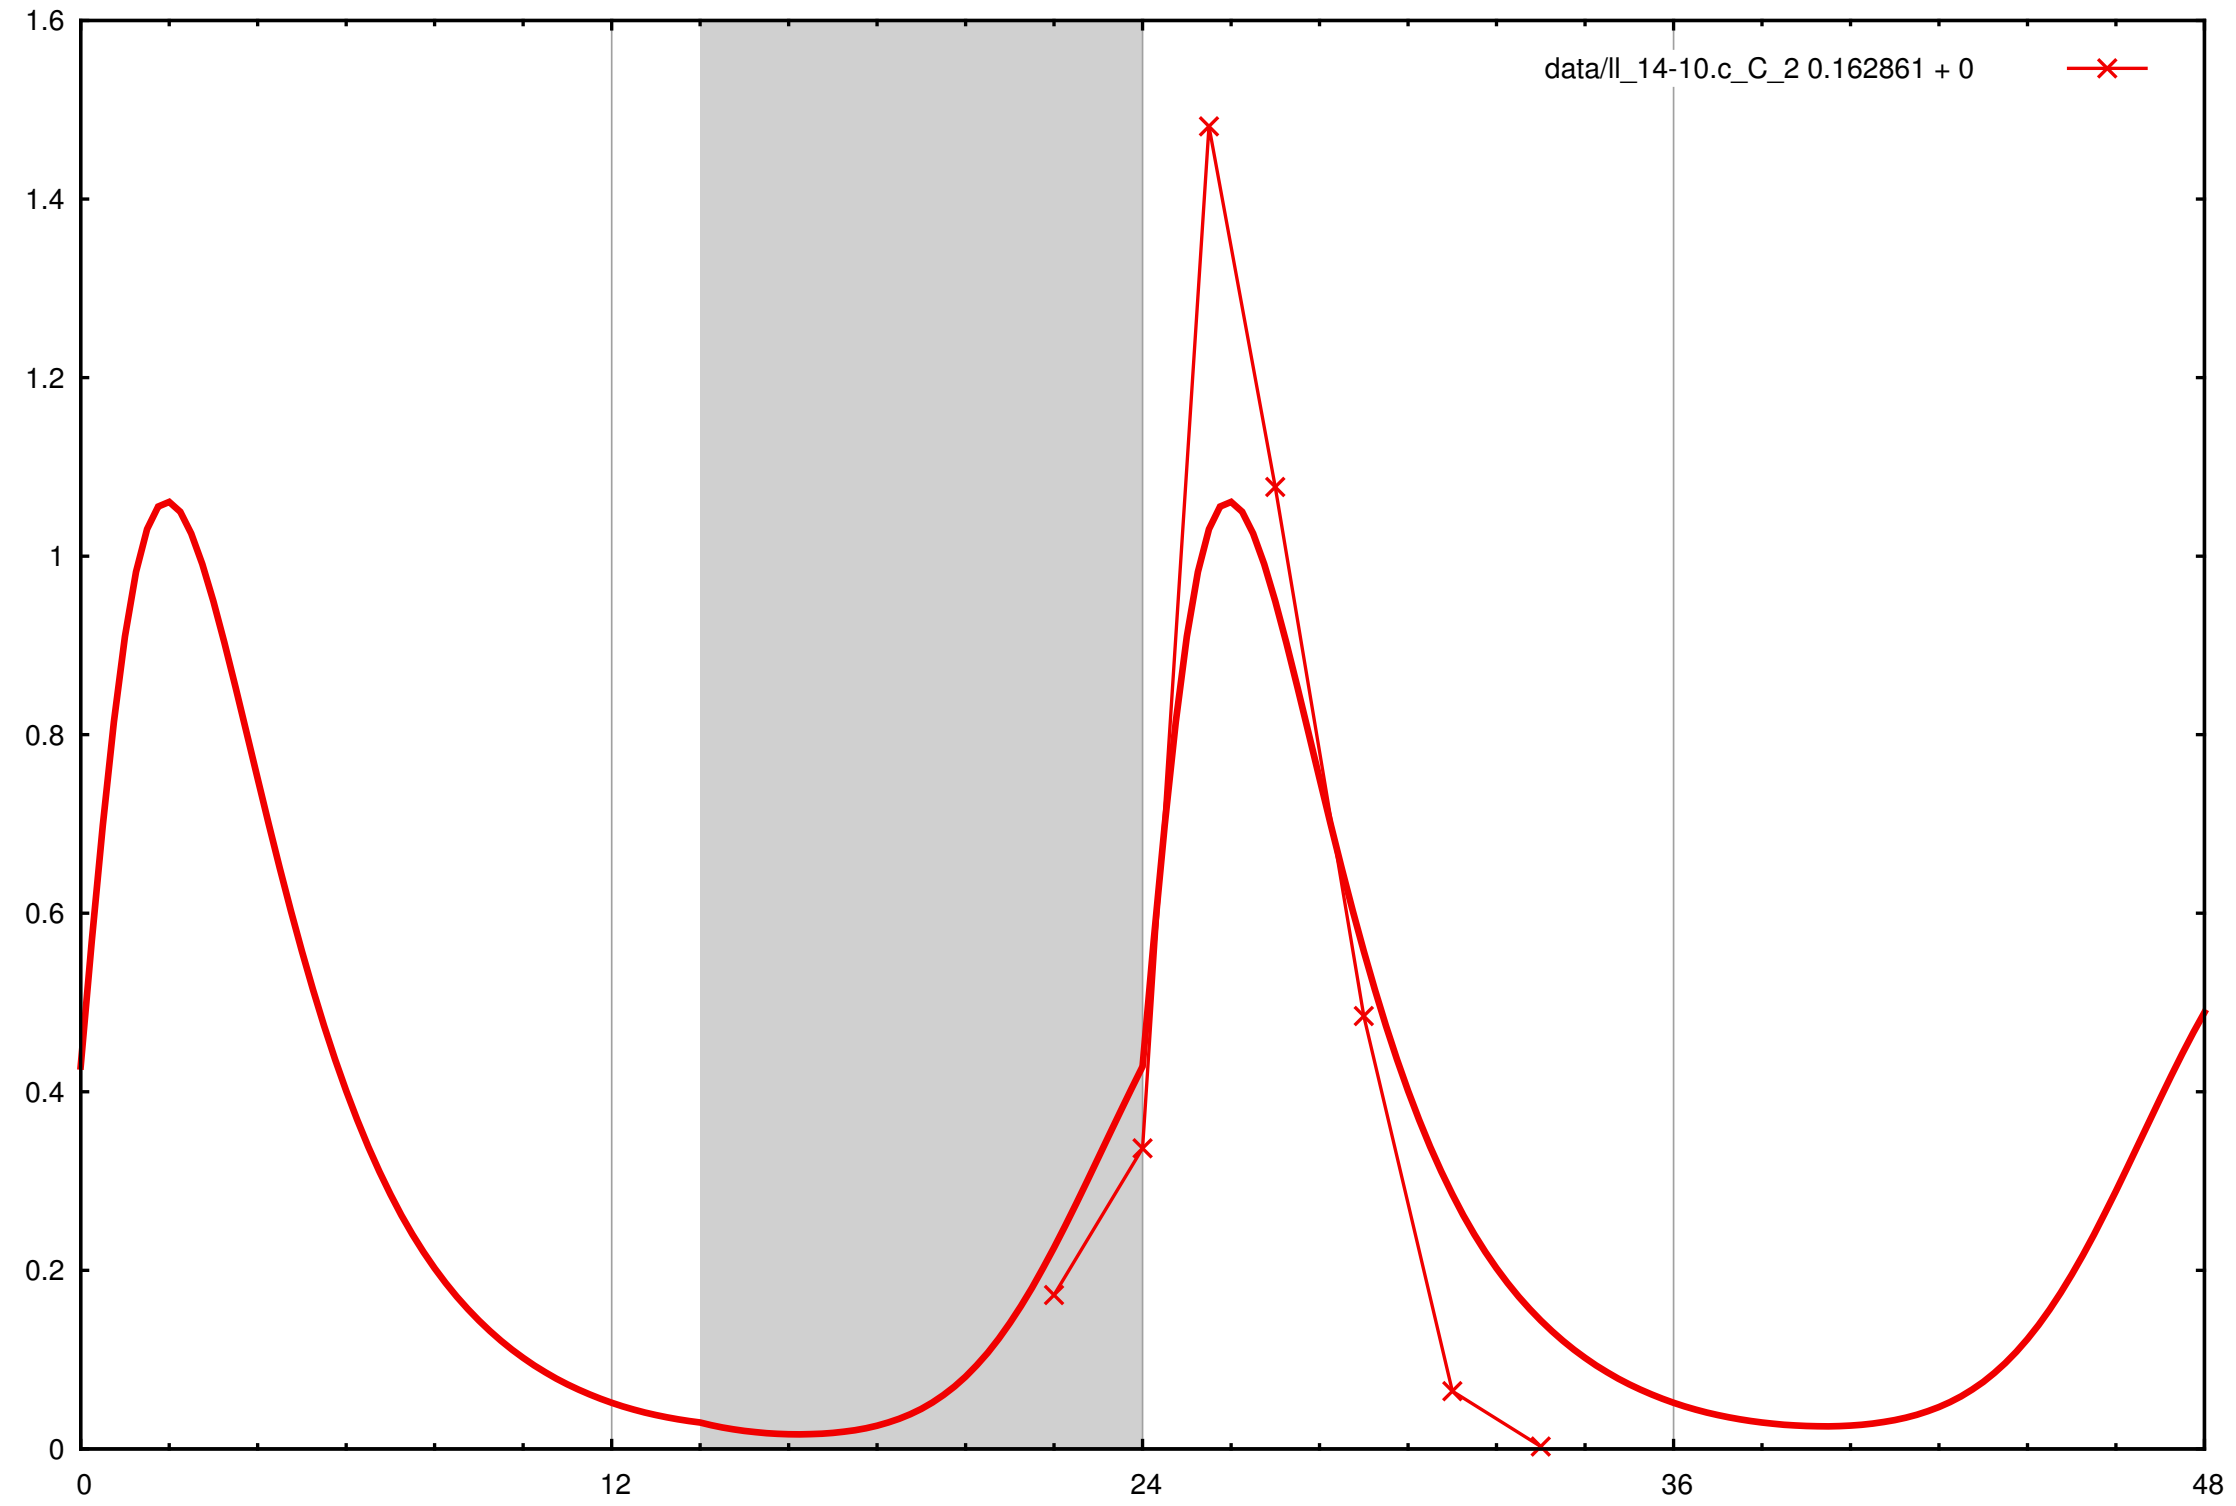

Supplement: pcbi.1003705.s008.pdf [file pcbi.1003705.s008.pdf]
