# Supplementary material for: Rethinking Transcriptional Activation in the Arabidopsis Circadian Clock
Source: PubMed Central journal article supplement (PMC4102396; doi:10.1371/journal.pcbi.1003705), 2014-07-17

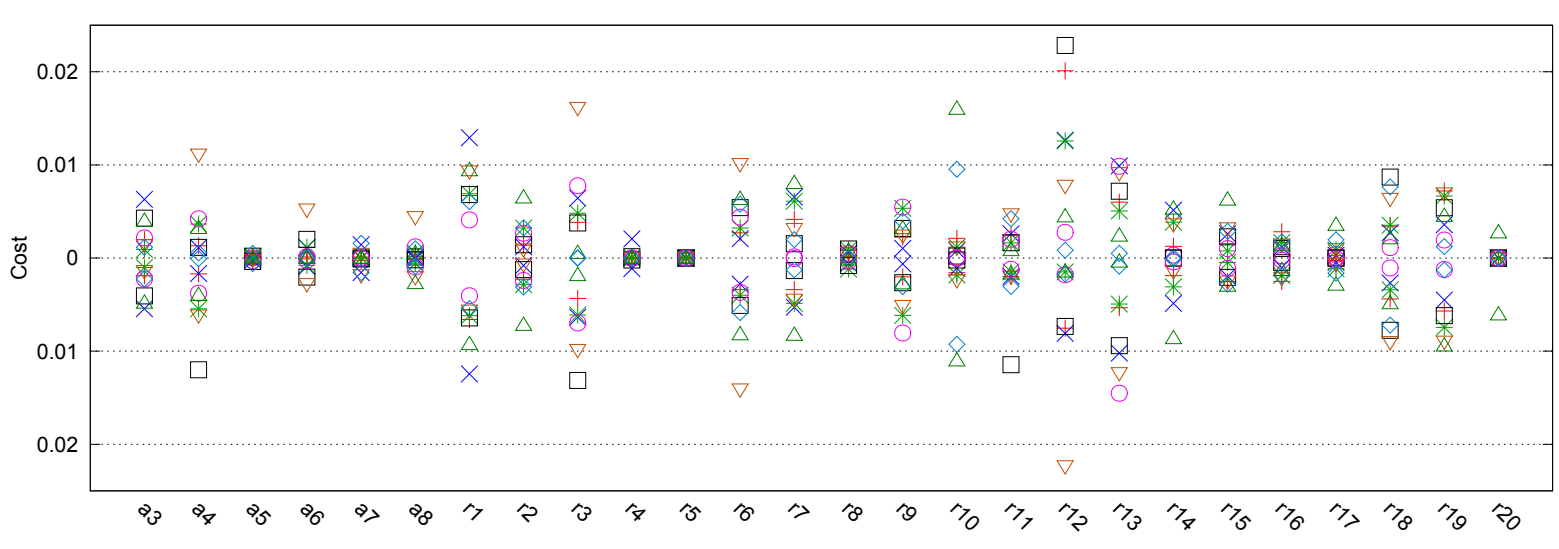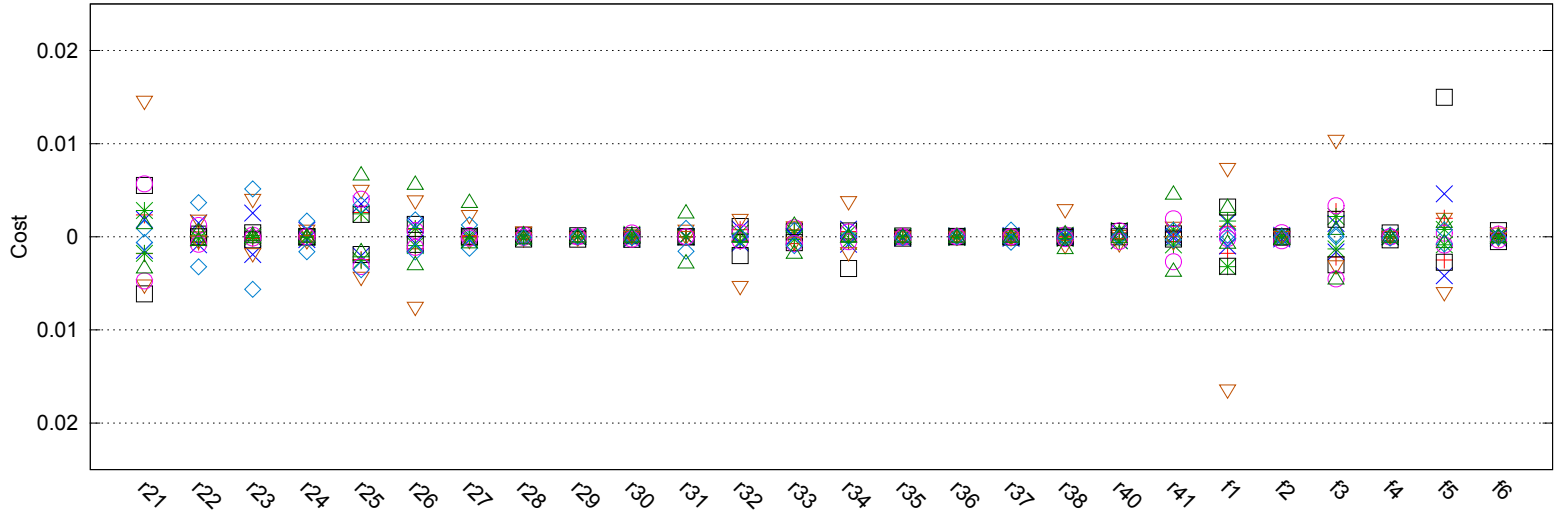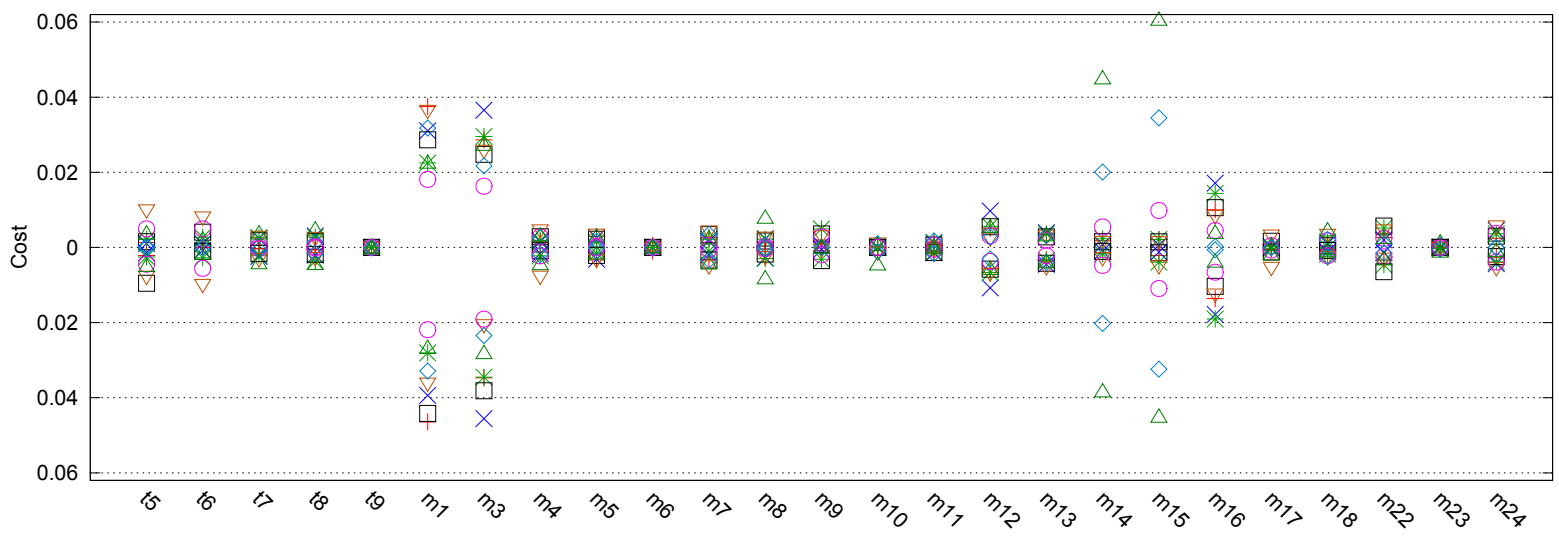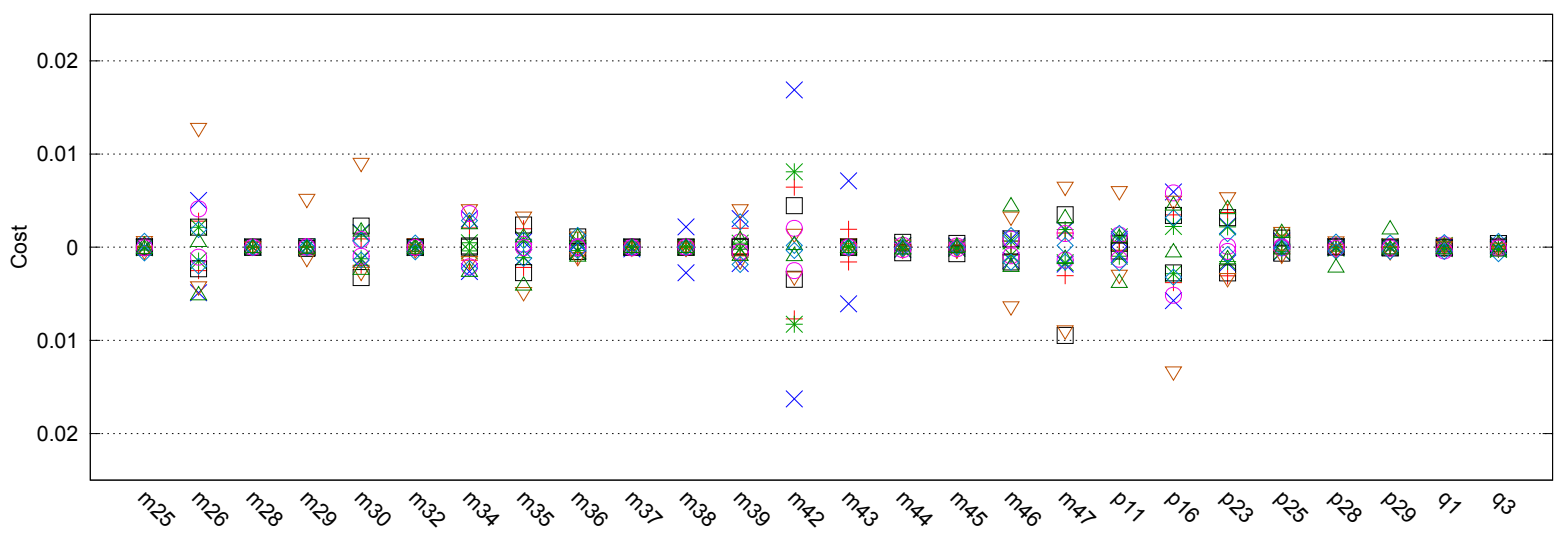

Supplement: pcbi.1003705.s007.pdf [file pcbi.1003705.s007.pdf]
