# Supplementary material for: Rethinking Transcriptional Activation in the Arabidopsis Circadian Clock
Source: PubMed Central journal article supplement (PMC4102396; doi:10.1371/journal.pcbi.1003705), 2014-07-17
Supplement: pcbi.1003705.s010.pdf [file pcbi.1003705.s010.pdf]

| Ref.              | Fig. | Reporter         | Light    | Mutant / Comment            | Weight |
|-------------------|------|------------------|----------|-----------------------------|--------|
| [1] Alabadi, 2001 | 1A   | <i>TOC1</i> mRNA | LL 12:12 | wt, Ler                     |        |
| [1] Alabadi, 2001 | 1A   | <i>TOC1</i> mRNA | LL 12:12 | lhy (lhy <sup>TN104</sup> ) |        |
| [1] Alabadi, 2001 | 1B   | <i>TOC1</i> mRNA | LL 12:12 | CCA1-ox                     |        |
| [1] Alabadi, 2001 | 1B   | <i>TOC1</i> mRNA | LL 12:12 | wt, Col                     |        |
| [1] Alabadi, 2001 | 1C   | <i>TOC1</i> mRNA | LL 12:12 | elf3-1                      |        |
| [1] Alabadi, 2001 | 1C   | <i>TOC1</i> mRNA | LL 12:12 | wt, Col                     |        |
| [2] Baudry, 2010  | 3D   | <i>CCA1</i> mRNA | LL 12:12 | ztl-4                       |        |
| [2] Baudry, 2010  | 3D   | <i>CCA1</i> mRNA | LL 12:12 | wt                          |        |
| [2] Baudry, 2010  | 3E   | <i>LHY</i> mRNA  | LL 12:12 | ztl-4                       |        |
| [2] Baudry, 2010  | 3E   | <i>LHY</i> mRNA  | LL 12:12 | wt                          |        |
| [2] Baudry, 2010  | 3F   | <i>PRR9</i> mRNA | LL 12:12 | ztl-4                       |        |
| [2] Baudry, 2010  | 3F   | <i>PRR9</i> mRNA | LL 12:12 | wt                          |        |
| [2] Baudry, 2010  | S1A  | ZTL pr           | LL 12:12 | wt                          |        |
| [2] Baudry, 2010  | S2   | <i>PRR5</i> mRNA | LL 12:12 | wt                          |        |
| [2] Baudry, 2010  | S2   | <i>PRR5</i> mRNA | LL 12:12 | ztl-4                       |        |
| [2] Baudry, 2010  | S2A  | <i>PRR7</i> mRNA | LL 12:12 | ztl-4                       |        |
| [2] Baudry, 2010  | S2A  | <i>PRR7</i> mRNA | LL 12:12 | wt                          |        |
| [2] Baudry, 2010  | S2A  | <i>PRR7</i> mRNA | LL 12:12 | lhy-20                      |        |
| [2] Baudry, 2010  | S5   | TOC1 pr          | LL 12:12 | ztl-4;fkf1;lkp2             |        |
| [2] Baudry, 2010  | S5   | TOC1 pr          | LL 12:12 | ztl-4                       |        |
| [2] Baudry, 2010  | S5   | TOC1 pr          | LL 12:12 | wt                          |        |
| [2] Baudry, 2010  | S5   | <i>TOC1</i> mRNA | LL 12:12 | ztl-4                       |        |
| [2] Baudry, 2010  | S5   | <i>TOC1</i> mRNA | LL 12:12 | wt                          |        |
| [2] Baudry, 2010  | S5   | PRR5 pr          | LL 12:12 | ztl-4;fkf1;lkp2             |        |
| [2] Baudry, 2010  | S5   | PRR5 pr          | LL 12:12 | ztl-4                       |        |
| [2] Baudry, 2010  | S5   | PRR5 pr          | LL 12:12 | wt                          |        |
| [3] Dai, 2011     | 1    | <i>NOX</i> mRNA  | LL 12:12 | wt, Col-0                   |        |
| [3] Dai, 2011     | 1    | <i>NOX</i> mRNA  | LL 12:12 | 35S:BOA-8                   |        |
| [3] Dai, 2011     | 5C   | <i>NOX</i> mRNA  | LL 12:12 | wt, Ws                      |        |
| [3] Dai, 2011     | 5C   | <i>NOX</i> mRNA  | LL 12:12 | cca1-11                     |        |
| [3] Dai, 2011     | 5C   | <i>NOX</i> mRNA  | LL 12:12 | lhy-21                      |        |
| [3] Dai, 2011     | 5C   | <i>NOX</i> mRNA  | LL 12:12 | lhy-21;cca1-11              |        |
| [3] Dai, 2011     | 6E   | <i>CCA1</i> mRNA | LL 12:12 | wt, Col-0                   |        |
| [3] Dai, 2011     | 6E   | <i>CCA1</i> mRNA | LL 12:12 | 35S:BOA-8                   |        |
| [3] Dai, 2011     | 7A   | <i>LHY</i> mRNA  | LL 12:12 | wt, Col-0                   |        |
| [3] Dai, 2011     | 7A   | <i>LHY</i> mRNA  | LL 12:12 | 35S:BOA-8                   |        |
| [3] Dai, 2011     | 7B   | <i>GI</i> mRNA   | LL 12:12 | wt, Col-0                   |        |
| [3] Dai, 2011     | 7B   | <i>GI</i> mRNA   | LL 12:12 | 35S:BOA-8                   |        |
| [3] Dai, 2011     | 7C   | <i>TOC1</i> mRNA | LL 12:12 | wt, Col-0                   |        |
| [3] Dai, 2011     | 7C   | <i>TOC1</i> mRNA | LL 12:12 | 35S:BOA-8                   |        |
| [3] Dai, 2011     | 8A   | <i>NOX</i> mRNA  | LL 12:12 | wt, C24                     |        |
| [3] Dai, 2011     | 8A   | <i>NOX</i> mRNA  | LL 12:12 | toc1-1                      |        |
| [3] Dai, 2011     | 8B   | <i>CCA1</i> mRNA | LL 12:12 | wt, C24                     |        |
| [3] Dai, 2011     | 8B   | <i>CCA1</i> mRNA | LL 12:12 | toc1-1                      | 5      |
| [3] Dai, 2011     | 8C   | <i>NOX</i> mRNA  | LL 12:12 | wt, Ler-0                   |        |
| [3] Dai, 2011     | 8C   | <i>NOX</i> mRNA  | LL 12:12 | gi-3                        |        |
| [3] Dai, 2011     | 8C   | <i>NOX</i> mRNA  | LL 12:12 | gi-4                        |        |
| [3] Dai, 2011     | S1   | <i>CCA1</i> mRNA | LL 12:12 | wt, Col-0                   |        |
| [3] Dai, 2011     | S1   | <i>CCA1</i> mRNA | LL 12:12 | boa-1                       |        |
| [3] Dai, 2011     | S1   | <i>NOX</i> mRNA  | LL 12:12 | wt, Col-0                   |        |
| [3] Dai, 2011     | S1   | <i>NOX</i> mRNA  | LL 12:12 | boa-1                       |        |
| [3] Dai, 2011     | S3   | <i>NOX</i> mRNA  | LL 12:12 | wt, Col-0                   |        |
| [3] Dai, 2011     | S3   | <i>NOX</i> mRNA  | LL 12:12 | CCA1-OX38                   |        |
| [3] Dai, 2011     | S6   | <i>CCA1</i> mRNA | DD 12:12 | wt, Col-0                   |        |

| Ref.              | Fig.  | Reporter         | Light    | Mutant / Comment              | Weight |
|-------------------|-------|------------------|----------|-------------------------------|--------|
| [3] Dai, 2011     | S6    | <i>CCA1</i> mRNA | DD 12:12 | 35S:BOA-8                     |        |
| [4] David, 2006   | 1C    | GI pr            | LD 16:8  | HA-GI protein                 |        |
| [4] David, 2006   | 1C    | GI pr            | LD 8:16  | HA-GI protein                 |        |
| [4] David, 2006   | 5C    | GI pr            | LD 16:8  | wt                            |        |
| [4] David, 2006   | 5C    | GI pr            | LD 8:16  | wt                            |        |
| [5] Ding, 2007    | 2A    | <i>GI</i> mRNA   | LL 12:12 | <i>cca1-11;lhy-21;toc1-21</i> |        |
| [5] Ding, 2007    | 2A    | <i>GI</i> mRNA   | LL 12:12 | wt                            |        |
| [5] Ding, 2007    | 2B    | <i>LUX</i> mRNA  | LL 12:12 | <i>cca1-11;lhy-21;toc1-21</i> |        |
| [5] Ding, 2007    | 2B    | <i>LUX</i> mRNA  | LL 12:12 | wt                            |        |
| [5] Ding, 2007    | 2C    | <i>PRR9</i> mRNA | LL 12:12 | <i>cca1-11;lhy-21;toc1-21</i> |        |
| [5] Ding, 2007    | 2C    | <i>PRR9</i> mRNA | LL 12:12 | wt                            |        |
| [5] Ding, 2007    | 5A    | <i>PRR9</i> mRNA | LD 8:16  | <i>lhy-21</i>                 |        |
| [5] Ding, 2007    | 5A    | <i>PRR9</i> mRNA | LD 8:16  | <i>cca1-11;toc1-21</i>        |        |
| [5] Ding, 2007    | 5A    | <i>PRR9</i> mRNA | LD 8:16  | <i>cca1-11;lhy-21;toc1-21</i> |        |
| [5] Ding, 2007    | 5A    | <i>PRR9</i> mRNA | LD 8:16  | <i>cca1-11;lhy-21</i>         |        |
| [5] Ding, 2007    | 5A    | <i>PRR9</i> mRNA | LD 8:16  | <i>cca1-11</i>                |        |
| [5] Ding, 2007    | 5A    | <i>PRR9</i> mRNA | LD 8:16  | wt                            |        |
| [5] Ding, 2007    | 5C    | <i>PRR9</i> mRNA | LD 8:16  | <i>toc1-21</i>                |        |
| [5] Ding, 2007    | 5C    | <i>PRR7</i> mRNA | LD 8:16  | <i>lhy-21;toc1-21</i>         |        |
| [5] Ding, 2007    | 5C    | <i>PRR7</i> mRNA | LD 8:16  | <i>lhy-21</i>                 |        |
| [5] Ding, 2007    | 5C    | <i>PRR7</i> mRNA | LD 8:16  | <i>cca1-11;toc1-21</i>        |        |
| [5] Ding, 2007    | 5C    | <i>PRR7</i> mRNA | LD 8:16  | <i>cca1-11;lhy-21;toc1-21</i> |        |
| [5] Ding, 2007    | 5C    | <i>PRR7</i> mRNA | LD 8:16  | <i>cca1-11;lhy-21</i>         |        |
| [5] Ding, 2007    | 5C    | <i>PRR7</i> mRNA | LD 8:16  | <i>cca1-11</i>                |        |
| [5] Ding, 2007    | 5C    | <i>PRR7</i> mRNA | LD 8:16  | wt                            |        |
| [6] Dixon, 2011   | S3    | <i>TOC1</i> mRNA | LD 12:12 | <i>elf3-4</i>                 | 3      |
| [6] Dixon, 2011   | S3    | <i>TOC1</i> mRNA | LD 12:12 | <i>cca1-11;lhy-21;elf3-4</i>  | 3      |
| [6] Dixon, 2011   | S3    | <i>TOC1</i> mRNA | LD 12:12 | <i>cca1-11;lhy-21</i>         | 3      |
| [6] Dixon, 2011   | S3, 2 | <i>TOC1</i> mRNA | LD 12:12 | wt, Ws                        |        |
| [6] Dixon, 2011   | S3    | <i>PRR9</i> mRNA | LD 12:12 | <i>elf3-4</i>                 | 3      |
| [6] Dixon, 2011   | S3    | <i>PRR9</i> mRNA | LD 12:12 | <i>cca1;lhy-21;elf3-4</i>     | 3      |
| [6] Dixon, 2011   | S3    | <i>PRR9</i> mRNA | LD 12:12 | <i>cca1-11;lhy-21</i>         | 3      |
| [6] Dixon, 2011   | S3    | <i>PRR9</i> mRNA | LD 12:12 | wt, Ws                        |        |
| [6] Dixon, 2011   | S3    | <i>PRR7</i> mRNA | LD 12:12 | <i>elf3-4</i>                 | 3      |
| [6] Dixon, 2011   | S3    | <i>PRR7</i> mRNA | LD 12:12 | <i>cca1;lhy-21;elf3-4</i>     | 3      |
| [6] Dixon, 2011   | S3    | <i>PRR7</i> mRNA | LD 12:12 | <i>cca1-11;lhy-21</i>         | 3      |
| [6] Dixon, 2011   | S3    | <i>PRR7</i> mRNA | LD 12:12 | wt, Ws                        |        |
| [6] Dixon, 2011   | S3    | <i>GI</i> mRNA   | LD 12:12 | <i>elf3-4</i>                 | 3      |
| [6] Dixon, 2011   | S3    | <i>GI</i> mRNA   | LD 12:12 | <i>cca1;lhy-21;elf3-4</i>     | 3      |
| [6] Dixon, 2011   | S3    | <i>GI</i> mRNA   | LD 12:12 | <i>cca1-11;lhy-21</i>         | 3      |
| [6] Dixon, 2011   | S3    | <i>GI</i> mRNA   | LD 12:12 | wt, Ws                        |        |
| [7] Edwards, 2010 | 2A    | <i>CCA1</i> mRNA | LL 9:15  | wt                            |        |
| [7] Edwards, 2010 | 2A    | <i>CCA1</i> mRNA | LL 6:18  | wt                            |        |
| [7] Edwards, 2010 | 2A    | <i>CCA1</i> mRNA | LL 3:21  | wt                            |        |
| [7] Edwards, 2010 | 2A    | <i>CCA1</i> mRNA | LL 18:6  | wt                            |        |
| [7] Edwards, 2010 | 2A    | <i>CCA1</i> mRNA | LL 12:12 | wt                            |        |
| [7] Edwards, 2010 | 2C    | <i>GI</i> mRNA   | LL 9:15  | wt                            |        |
| [7] Edwards, 2010 | 2C    | <i>GI</i> mRNA   | LL 6:18  | wt                            |        |
| [7] Edwards, 2010 | 2C    | <i>GI</i> mRNA   | LL 3:21  | wt                            |        |
| [7] Edwards, 2010 | 2C    | <i>GI</i> mRNA   | LL 18:6  | wt                            |        |
| [7] Edwards, 2010 | 2C    | <i>GI</i> mRNA   | LL 12:12 | wt                            |        |
| [7] Edwards, 2010 | 2E    | <i>TOC1</i> mRNA | LL 9:15  | wt                            |        |
| [7] Edwards, 2010 | 2E    | <i>TOC1</i> mRNA | LL 6:18  | wt                            |        |
| [7] Edwards, 2010 | 2E    | <i>TOC1</i> mRNA | LL 3:21  | wt                            |        |

| Ref.              | Fig. | Reporter         | Light    | Mutant / Comment | Weight |
|-------------------|------|------------------|----------|------------------|--------|
| [7] Edwards, 2010 | 2E   | <i>TOC1</i> mRNA | LL 18:6  | wt               |        |
| [7] Edwards, 2010 | 2E   | <i>TOC1</i> mRNA | LL 12:12 | wt               |        |
| [7] Edwards, 2010 | 2B   | <i>CCA1</i> mRNA | DD 12:12 | wt               |        |
| [7] Edwards, 2010 | 2B   | <i>CCA1</i> mRNA | DD 18:6  | wt               |        |
| [7] Edwards, 2010 | 2B   | <i>CCA1</i> mRNA | DD 6:18  | wt               |        |
| [7] Edwards, 2010 | 2D   | <i>GI</i> mRNA   | DD 12:12 | wt               |        |
| [7] Edwards, 2010 | 2D   | <i>GI</i> mRNA   | DD 18:6  | wt               |        |
| [7] Edwards, 2010 | 2D   | <i>GI</i> mRNA   | DD 6:18  | wt               |        |
| [7] Edwards, 2010 | 2E   | <i>TOC1</i> mRNA | DD 18:6  | wt               |        |
| [7] Edwards, 2010 | 2F   | <i>TOC1</i> mRNA | DD 12:12 | wt               |        |
| [7] Edwards, 2010 | 2F   | <i>TOC1</i> mRNA | DD 6:18  | wt               |        |
| [7] Edwards, 2010 | S3   | <i>CCA1</i> mRNA | DD 12:12 | wt               |        |
| [7] Edwards, 2010 | S3   | <i>GI</i> mRNA   | DD 12:12 | wt               |        |
| [7] Edwards, 2010 | S3   | <i>TOC1</i> mRNA | DD 12:12 | wt               |        |
| [7] Edwards, 2010 | S3   | <i>CCA1</i> mRNA | DD 3:21  | wt               |        |
| [7] Edwards, 2010 | S3   | <i>GI</i> mRNA   | DD 3:21  | wt               |        |
| [7] Edwards, 2010 | S3   | <i>TOC1</i> mRNA | DD 3:21  | wt               |        |
| [7] Edwards, 2010 | S3   | <i>CCA1</i> mRNA | DD 9:15  | wt               |        |
| [7] Edwards, 2010 | S3   | <i>GI</i> mRNA   | DD 9:15  | wt               |        |
| [7] Edwards, 2010 | S3   | <i>TOC1</i> mRNA | DD 9:15  | wt               |        |
| [8] Farinas, 2011 | 1A   | <i>CCA1</i> mRNA | LL 12:12 | wt               |        |
| [8] Farinas, 2011 | 1B   | <i>CCA1</i> mRNA | LL 8:16  | wt               |        |
| [8] Farinas, 2011 | 1C   | <i>CCA1</i> mRNA | LL 16:8  | wt               |        |
| [8] Farinas, 2011 | 1A   | <i>RVE8</i> mRNA | LL 12:12 | wt               |        |
| [8] Farinas, 2011 | 1B   | <i>RVE8</i> mRNA | LL 8:16  | wt               |        |
| [8] Farinas, 2011 | 1C   | <i>RVE8</i> mRNA | LL 16:8  | wt               |        |
| [8] Farinas, 2011 | 1D   | <i>TOC1</i> mRNA | LL 12:12 | wt               |        |
| [8] Farinas, 2011 | 1F   | <i>TOC1</i> mRNA | LL 16:8  | wt               |        |
| [8] Farinas, 2011 | 1E   | <i>TOC1</i> mRNA | LL 8:16  | wt               |        |
| [8] Farinas, 2011 | 2C   | <i>RVE8</i> mRNA | LL 16:8  | wt               |        |
| [8] Farinas, 2011 | 2C   | <i>RVE8</i> mRNA | LL 16:8  | CCA1-ox          |        |
| [8] Farinas, 2011 | 2F   | <i>RVE8</i> mRNA | LL 16:8  | cca1;lhy         |        |
| [8] Farinas, 2011 | 3C   | <i>CCA1</i> mRNA | LL 16:8  | wt               |        |
| [8] Farinas, 2011 | 3C   | <i>CCA1</i> mRNA | LL 16:8  | RVE8-ox          |        |
| [8] Farinas, 2011 | 3F   | <i>CCA1</i> mRNA | LL 16:8  | rve8             |        |
| [8] Farinas, 2011 | 4C   | <i>TOC1</i> mRNA | LL 16:8  | wt               |        |
| [8] Farinas, 2011 | 4C   | <i>TOC1</i> mRNA | LL 16:8  | RVE8-ox          |        |
| [8] Farinas, 2011 | 4F   | <i>TOC1</i> mRNA | LL 16:8  | rve8             |        |
| [9] Farré, 2005   | 3F   | <i>TOC1</i> mRNA | LL 12:12 | prp7-3;prp9-1    | 3      |
| [9] Farré, 2005   | 3E   | <i>TOC1</i> mRNA | LL 12:12 | prp9-1           |        |
| [9] Farré, 2005   | 3E   | <i>TOC1</i> mRNA | LL 12:12 | prp7-3           |        |
| [9] Farré, 2005   | 3E   | <i>TOC1</i> mRNA | LL 12:12 | wt, Col          |        |
| [9] Farré, 2005   | 3D   | <i>LHY</i> mRNA  | LL 12:12 | prp7-3;prp9-1    | 3      |
| [9] Farré, 2005   | 3C   | <i>LHY</i> mRNA  | LL 12:12 | prp9-1           |        |
| [9] Farré, 2005   | 3C   | <i>LHY</i> mRNA  | LL 12:12 | prp7-3           |        |
| [9] Farré, 2005   | 3C   | <i>LHY</i> mRNA  | LL 12:12 | wt, Col          |        |
| [9] Farré, 2005   | 3B   | <i>CCA1</i> mRNA | LL 12:12 | prp7-3;prp9-1    | 3      |
| [9] Farré, 2005   | 3A   | <i>CCA1</i> mRNA | LL 12:12 | prp9-1           |        |
| [9] Farré, 2005   | 3A   | <i>CCA1</i> mRNA | LL 12:12 | prp7-3           |        |
| [9] Farré, 2005   | 3A   | <i>CCA1</i> mRNA | LL 12:12 | wt, Col          |        |
| [9] Farré, 2005   | 4A   | <i>PRR9</i> mRNA | LD 12:12 | wt, Ws           |        |
| [9] Farré, 2005   | 4A   | <i>PRR9</i> mRNA | LD 12:12 | cca1-1           |        |
| [9] Farré, 2005   | 4A   | <i>PRR9</i> mRNA | LD 12:12 | cca1-1;lhy-R     |        |
| [9] Farré, 2005   | 4B   | <i>PRR9</i> mRNA | LD 12:12 | cca1-ox          |        |

| Ref.                | Fig. | Reporter         | Light    | Mutant / Comment             | Weight |
|---------------------|------|------------------|----------|------------------------------|--------|
| [9] Farré, 2005     | 4B   | <i>PRR9</i> mRNA | LD 12:12 | wt, Col                      |        |
| [9] Farré, 2005     | 4C   | <i>PRR9</i> mRNA | LD 12:12 | lhy-1 (-ox)                  |        |
| [9] Farré, 2005     | 4C   | <i>PRR9</i> mRNA | LD 12:12 | wt, Ler                      |        |
| [9] Farré, 2005     | 4D   | <i>PRR7</i> mRNA | LD 12:12 | wt, Ws                       |        |
| [9] Farré, 2005     | 4D   | <i>PRR7</i> mRNA | LD 12:12 | cca1-1, Ws                   |        |
| [9] Farré, 2005     | 4D   | <i>PRR7</i> mRNA | LD 12:12 | cca1-1;lhy-R                 |        |
| [9] Farré, 2005     | 4E   | <i>PRR7</i> mRNA | LD 12:12 | cca1-ox                      |        |
| [9] Farré, 2005     | 4E   | <i>PRR7</i> mRNA | LD 12:12 | wt, Col                      |        |
| [9] Farré, 2005     | 4F   | <i>PRR7</i> mRNA | LD 12:12 | lhy-1 (-ox)                  |        |
| [9] Farré, 2005     | 4F   | <i>PRR7</i> mRNA | LD 12:12 | wt, Ler                      |        |
| [10] Farré, 2007    | 3G   | <i>TOC1</i> mRNA | LL 12:12 | P7-ox                        | 3      |
| [10] Farré, 2007    | 3G   | <i>TOC1</i> mRNA | LL 12:12 | wt                           |        |
| [10] Farré, 2007    | 3J   | <i>PRR7</i> mRNA | LL 12:12 | P7-ox                        | 3      |
| [10] Farré, 2007    | 3J   | <i>PRR7</i> mRNA | LL 12:12 | wt                           |        |
| [10] Farré, 2007    | 3D   | <i>LHY</i> mRNA  | LL 12:12 | P7-ox                        | 3      |
| [10] Farré, 2007    | 3D   | <i>LHY</i> mRNA  | LL 12:12 | wt                           |        |
| [10] Farré, 2007    | 3A   | <i>CCA1</i> mRNA | LL 12:12 | P7-ox                        | 3      |
| [10] Farré, 2007    | 3A   | <i>CCA1</i> mRNA | LL 12:12 | wt                           |        |
| [10] Farré, 2007    | 4B   | <i>CCA1</i> mRNA | LL 12:12 | P7-ox                        | 3      |
| [10] Farré, 2007    | 4B   | <i>CCA1</i> mRNA | LL 12:12 | wt                           |        |
| [10] Farré, 2007    | 4B   | <i>CCA1</i> mRNA | LL 12:12 | prp7-3                       |        |
| [10] Farré, 2007    | 5A   | <i>PRR7</i> pr   | LL 12:12 | wt                           |        |
| [10] Farré, 2007    | 5B   | <i>PRR7</i> pr   | DD 12:12 | wt                           |        |
| [10] Farré, 2007    | 5C   | <i>PRR7</i> pr   | LL 12:12 | P7-ox                        |        |
| [10] Farré, 2007    | 5D   | <i>PRR7</i> pr   | DD 12:12 | P7-ox                        |        |
| [11] Fowler, 1999   | 3A   | <i>GI</i> mRNA   | DD 18:6  | wt                           |        |
| [11] Fowler, 1999   | 3A   | <i>GI</i> mRNA   | LD 18:6  | wt                           |        |
| [11] Fowler, 1999   | 3A   | <i>GI</i> mRNA   | LL 18:6  | wt                           |        |
| [11] Fowler, 1999   | 3B   | <i>GI</i> mRNA   | LD 10:14 | wt, shifted 18:6 to 10:14    |        |
| [11] Fowler, 1999   | 3B   | <i>GI</i> mRNA   | LD 18:6  | wt                           |        |
| [11] Fowler, 1999   | 3B   | <i>GI</i> mRNA   | LD 10:14 | wt                           |        |
| [11] Fowler, 1999   | 3B   | <i>GI</i> mRNA   | LD 18:6  | wt                           |        |
| [11] Fowler, 1999   | 4A   | <i>GI</i> mRNA   | LD 18:6  | wt, measured in LDL 18:5:1   |        |
| [11] Fowler, 1999   | 4A   | <i>GI</i> mRNA   | LD 18:6  | elf3, measured in LDL 18:5:1 |        |
| [11] Fowler, 1999   | 4C   | <i>GI</i> mRNA   | LL 18:6  | elf3                         |        |
| [11] Fowler, 1999   | 4C   | <i>GI</i> mRNA   | LL 18:6  | wt                           |        |
| [11] Fowler, 1999   | 5A   | <i>GI</i> mRNA   | LL 18:6  | C-ox                         |        |
| [11] Fowler, 1999   | 5A   | <i>GI</i> mRNA   | LL 18:6  | wt                           |        |
| [11] Fowler, 1999   | 5B   | <i>GI</i> mRNA   | LD 18:6  | lhy-ox                       |        |
| [11] Fowler, 1999   | 5B   | <i>GI</i> mRNA   | LD 18:6  | wt                           |        |
| [11] Fowler, 1999   | 5C   | <i>CCA1</i> mRNA | LD 18:6  | lhy-ox                       |        |
| [11] Fowler, 1999   | 5C   | <i>CCA1</i> mRNA | LD 18:6  | wt                           |        |
| [11] Fowler, 1999   | 6A   | <i>LHY</i> mRNA  | LD 18:6  | wt, measured in LDL 18:5:1   |        |
| [11] Fowler, 1999   | 6A   | <i>LHY</i> mRNA  | LD 18:6  | gi-3, measured in LDL 18:5:1 |        |
| [11] Fowler, 1999   | 6B   | <i>CCA1</i> mRNA | LD 18:6  | wt, measured in LDL 18:5:1   |        |
| [11] Fowler, 1999   | 6B   | <i>CCA1</i> mRNA | LD 18:6  | gi-3, measured in LDL 18:5:1 |        |
| [12] Fujiwara, 2008 | 1A   | <i>PRR9</i> mRNA | LL 12:12 | wt                           |        |
| [12] Fujiwara, 2008 | 1B   | <i>PRR7</i> mRNA | LL 12:12 | wt                           |        |
| [12] Fujiwara, 2008 | 1C   | <i>PRR5</i> mRNA | LL 12:12 | wt                           |        |
| [12] Fujiwara, 2008 | 1E   | <i>TOC1</i> mRNA | LL 12:12 | wt                           |        |
| [12] Fujiwara, 2008 | 3A   | <i>PRR9</i> mRNA | LL 12:12 | ztl-1                        |        |
| [13] Hazen, 2005    | 4A   | <i>CCA1</i> mRNA | LL 12:12 | wt                           |        |
| [13] Hazen, 2005    | 4A   | <i>CCA1</i> mRNA | LL 12:12 | lux-1                        |        |
| [13] Hazen, 2005    | 4A   | <i>CCA1</i> mRNA | LL 12:12 | lux-2                        |        |

| Ref.               | Fig. | Reporter         | Light    | Mutant / Comment | Weight |
|--------------------|------|------------------|----------|------------------|--------|
| [13] Hazen, 2005   | 4B   | <i>LHY</i> mRNA  | LL 12:12 | wt               |        |
| [13] Hazen, 2005   | 4B   | <i>LHY</i> mRNA  | LL 12:12 | lux-1            |        |
| [13] Hazen, 2005   | 4B   | <i>LHY</i> mRNA  | LL 12:12 | lux-2            |        |
| [13] Hazen, 2005   | 4C   | <i>TOC1</i> mRNA | LL 12:12 | wt               |        |
| [13] Hazen, 2005   | 4C   | <i>TOC1</i> mRNA | LL 12:12 | lux-1            |        |
| [13] Hazen, 2005   | 4C   | <i>TOC1</i> mRNA | LL 12:12 | lux-2            |        |
| [14] Helfer, 2011  | 3A   | <i>LUX</i> mRNA  | LD 12:12 | wt               |        |
| [14] Helfer, 2011  | 3A   | <i>PRR9</i> mRNA | LD 12:12 | wt               |        |
| [14] Helfer, 2011  | 3B   | <i>LUX</i> mRNA  | LL 12:12 | wt               |        |
| [14] Helfer, 2011  | 3B   | <i>PRR9</i> mRNA | LL 12:12 | wt               |        |
| [14] Helfer, 2011  | 3C   | <i>PRR9</i> mRNA | LL 12:12 | wt               |        |
| [14] Helfer, 2011  | 3C   | <i>PRR9</i> mRNA | LL 12:12 | lux-4            |        |
| [14] Helfer, 2011  | S1B  | <i>LUX</i> mRNA  | LD 12:12 | wt               |        |
| [14] Helfer, 2011  | S1B  | <i>NOX</i> mRNA  | LD 12:12 | wt               |        |
| [14] Helfer, 2011  | S1C  | <i>LUX</i> mRNA  | LL 12:12 | wt               |        |
| [14] Helfer, 2011  | S1C  | <i>NOX</i> mRNA  | LL 12:12 | wt               |        |
| [15] Herrero, 2011 | 3.11 | <i>PRR9</i> mRNA | LD 8:16  | E4-ox            |        |
| [15] Herrero, 2011 | 3.11 | <i>PRR9</i> mRNA | LD 8:16  | E3-ox            |        |
| [15] Herrero, 2011 | 3.11 | <i>PRR9</i> mRNA | LD 8:16  | wt               |        |
| [15] Herrero, 2011 | 3.11 | <i>PRR7</i> mRNA | LD 8:16  | E4-ox            |        |
| [15] Herrero, 2011 | 3.11 | <i>PRR7</i> mRNA | LD 8:16  | E3-ox            |        |
| [15] Herrero, 2011 | 3.11 | <i>PRR7</i> mRNA | LD 8:16  | wt               |        |
| [15] Herrero, 2011 | 3.11 | <i>PRR9</i> mRNA | LL 12:12 | E4-ox            |        |
| [15] Herrero, 2011 | 3.11 | <i>PRR9</i> mRNA | LL 12:12 | E3-ox            |        |
| [15] Herrero, 2011 | 3.11 | <i>PRR9</i> mRNA | LL 12:12 | wt               |        |
| [15] Herrero, 2011 | 3.11 | <i>PRR7</i> mRNA | LL 12:12 | E4-ox            |        |
| [15] Herrero, 2011 | 3.11 | <i>PRR7</i> mRNA | LL 12:12 | E3-ox            |        |
| [15] Herrero, 2011 | 3.11 | <i>PRR7</i> mRNA | LL 12:12 | wt               |        |
| [15] Herrero, 2011 | 3.2A | <i>LHY</i> mRNA  | LL 12:12 | elf3-4, LHY::LUC |        |
| [15] Herrero, 2011 | 3.2A | <i>LHY</i> mRNA  | LL 12:12 | E4-ox, LHY::LUC  |        |
| [15] Herrero, 2011 | 3.2B | <i>LHY</i> mRNA  | LL 12:12 | elf4-1, LHY::LUC |        |
| [15] Herrero, 2011 | 3.2B | <i>LHY</i> mRNA  | LL 12:12 | E3-ox, LHY::LUC  |        |
| [15] Herrero, 2011 | 3.2B | <i>LHY</i> mRNA  | LL 12:12 | wt, LHY::LUC     |        |
| [16] Hicks, 2001   | 4B   | <i>ELF3</i> mRNA | LD 12:12 | wt               |        |
| [16] Hicks, 2001   | 4D   | <i>ELF3</i> mRNA | LD 12:12 | elf3-1           |        |
| [16] Hicks, 2001   | 4D   | <i>ELF3</i> mRNA | LD 12:12 | elf3-2           |        |
| [16] Hicks, 2001   | 4E   | <i>ELF3</i> mRNA | LD 18:6  | wt               |        |
| [16] Hicks, 2001   | 4E   | <i>ELF3</i> mRNA | LD 9:15  | wt               |        |
| [16] Hicks, 2001   | 6A   | <i>ELF3</i> mRNA | LL 12:12 | wt, Ler          |        |
| [16] Hicks, 2001   | 6A   | <i>ELF3</i> mRNA | LL 12:12 | lhy              |        |
| [17] Hsu, 2012     | 2H   | <i>CCA1</i> mRNA | LL 12:12 | Col              |        |
| [17] Hsu, 2012     | 2H   | <i>CCA1</i> mRNA | LL 12:12 | rve8-1           |        |
| [17] Hsu, 2012     | 1C   | <i>RVE8</i> mRNA | LL 12:12 | Col              |        |
| [17] Hsu, 2012     | 1C   | <i>RVE8</i> mRNA | LL 12:12 | rve8             |        |
| [17] Hsu, 2012     | 2G   | <i>CCA1</i> mRNA | LL 12:12 | Col              |        |
| [17] Hsu, 2012     | 2G   | <i>CCA1</i> mRNA | LL 12:12 | rve8-1           |        |
| [18] Hsu, 2013     | 5A   | <i>PRR5</i> mRNA | LD 12:12 | wt, Col          |        |
| [18] Hsu, 2013     | 5A   | <i>PRR5</i> mRNA | LD 12:12 | rve4,rve6,rve8   |        |
| [18] Hsu, 2013     | 5B   | <i>TOC1</i> mRNA | LD 12:12 | wt, Col          |        |
| [18] Hsu, 2013     | 5B   | <i>TOC1</i> mRNA | LD 12:12 | rve4,rve6,rve8   |        |
| [18] Hsu, 2013     | 5C   | <i>CCA1</i> mRNA | LD 12:12 | wt, Col          |        |
| [18] Hsu, 2013     | 5C   | <i>CCA1</i> mRNA | LD 12:12 | rve4,rve6,rve8   |        |
| [18] Hsu, 2013     | 5D   | <i>LHY</i> mRNA  | LD 12:12 | wt, Col          |        |
| [18] Hsu, 2013     | 5D   | <i>LHY</i> mRNA  | LD 12:12 | rve4,rve6,rve8   |        |

| Ref.             | Fig. | Reporter         | Light    | Mutant / Comment   | Weight |
|------------------|------|------------------|----------|--------------------|--------|
| [18] Hsu, 2013   | 5I   | <i>PRR5</i> mRNA | LL 12:12 | wt Col             |        |
| [18] Hsu, 2013   | 5I   | <i>PRR5</i> mRNA | LL 12:12 | rve4,rve6,rve8     |        |
| [18] Hsu, 2013   | 5J   | <i>TOC1</i> mRNA | LL 12:12 | wt Col             |        |
| [18] Hsu, 2013   | 5J   | <i>TOC1</i> mRNA | LL 12:12 | rve4,rve6,rve8     |        |
| [18] Hsu, 2013   | 5K   | <i>CCA1</i> mRNA | LL 12:12 | wt Col             |        |
| [18] Hsu, 2013   | 5K   | <i>CCA1</i> mRNA | LL 12:12 | rve4,rve6,rve8     |        |
| [18] Hsu, 2013   | 5L   | <i>LHY</i> mRNA  | LL 12:12 | wt Col             |        |
| [18] Hsu, 2013   | 5L   | <i>LHY</i> mRNA  | LL 12:12 | rve4,rve6,rve8     |        |
| [18] Hsu, 2013   | 5M   | <i>TOC1</i> mRNA | LL 12:12 | wt Col             |        |
| [18] Hsu, 2013   | 5M   | <i>TOC1</i> mRNA | LL 12:12 | rve4,rve6,rve8     |        |
| [18] Hsu, 2013   | 5O   | <i>LHY</i> mRNA  | LL 12:12 | wt Col             |        |
| [18] Hsu, 2013   | 5O   | <i>LHY</i> mRNA  | LL 12:12 | rve4,rve6,rve8     |        |
| [18] Hsu, 2013   | 6A   | <i>RVE8</i> mRNA | LD 12:12 | wt Col             |        |
| [18] Hsu, 2013   | 6A   | <i>RVE8</i> mRNA | LD 12:12 | toc1-4             |        |
| [18] Hsu, 2013   | 6A   | <i>RVE8</i> mRNA | LD 12:12 | lux-1              |        |
| [18] Hsu, 2013   | 6A   | <i>RVE8</i> mRNA | LD 12:12 | CCA1-ox            |        |
| [18] Hsu, 2013   | 6B   | <i>PRR5</i> mRNA | LD 12:12 | wt Col, one point  |        |
| [18] Hsu, 2013   | 6B   | <i>PRR5</i> mRNA | LD 12:12 | toc1-4, one point  |        |
| [18] Hsu, 2013   | 6B   | <i>PRR5</i> mRNA | LD 12:12 | lux-1, one point   |        |
| [18] Hsu, 2013   | 6B   | <i>PRR5</i> mRNA | LD 12:12 | CCA1-ox, one point |        |
| [18] Hsu, 2013   | 6B   | <i>PRR7</i> mRNA | LD 12:12 | wt Col, one point  |        |
| [18] Hsu, 2013   | 6B   | <i>PRR7</i> mRNA | LD 12:12 | toc1-4, one point  |        |
| [18] Hsu, 2013   | 6B   | <i>PRR7</i> mRNA | LD 12:12 | lux-1, one point   |        |
| [18] Hsu, 2013   | 6B   | <i>PRR7</i> mRNA | LD 12:12 | CCA1-ox, one point |        |
| [18] Hsu, 2013   | 6B   | <i>PRR9</i> mRNA | LD 12:12 | wt Col, one point  |        |
| [18] Hsu, 2013   | 6B   | <i>PRR9</i> mRNA | LD 12:12 | toc1-4, one point  |        |
| [18] Hsu, 2013   | 6B   | <i>PRR9</i> mRNA | LD 12:12 | lux-1, one point   |        |
| [18] Hsu, 2013   | 6B   | <i>PRR9</i> mRNA | LD 12:12 | CCA1-ox, one point |        |
| [19] Huang, 2012 | 2L   | <i>ELF4</i> mRNA | LD 12:12 | wt                 |        |
| [19] Huang, 2012 | 2L   | <i>ELF4</i> mRNA | LD 12:12 | TOC1-ox            |        |
| [19] Huang, 2012 | 2K   | <i>GI</i> mRNA   | LD 12:12 | wt                 |        |
| [19] Huang, 2012 | 2K   | <i>GI</i> mRNA   | LD 12:12 | TOC1-ox            |        |
| [19] Huang, 2012 | 2I   | <i>PRR9</i> mRNA | LD 12:12 | TOC1-ox            |        |
| [19] Huang, 2012 | 2I   | <i>PRR9</i> mRNA | LD 12:12 | wt                 |        |
| [19] Huang, 2012 | 2J   | <i>PRR7</i> mRNA | LD 12:12 | TOC1-ox            |        |
| [19] Huang, 2012 | 2J   | <i>PRR7</i> mRNA | LD 12:12 | wt                 |        |
| [19] Huang, 2012 | 4A   | <i>LHY</i> mRNA  | LL 12:12 | wt                 |        |
| [19] Huang, 2012 | 4A   | <i>LHY</i> mRNA  | LL 12:12 | TOCRNAi            |        |
| [19] Huang, 2012 | 4B   | <i>PRR7</i> mRNA | LL 12:12 | wt                 |        |
| [19] Huang, 2012 | 4B   | <i>PRR7</i> mRNA | LL 12:12 | TOCRNAi            |        |
| [19] Huang, 2012 | 4C   | <i>PRR9</i> mRNA | LL 12:12 | wt                 |        |
| [19] Huang, 2012 | 4C   | <i>PRR9</i> mRNA | LL 12:12 | TOCRNAi            |        |
| [19] Huang, 2012 | 4D   | <i>GI</i> mRNA   | LL 12:12 | wt                 |        |
| [19] Huang, 2012 | 4D   | <i>GI</i> mRNA   | LL 12:12 | TOCRNAi            |        |
| [19] Huang, 2012 | S10  | <i>PRR7</i> mRNA | LD 12:12 | wt                 |        |
| [19] Huang, 2012 | S10  | <i>LHY</i> mRNA  | LD 12:12 | wt                 |        |
| [19] Huang, 2012 | S10  | <i>LHY</i> mRNA  | LD 12:12 | toc1-2             |        |
| [19] Huang, 2012 | S10  | <i>PRR7</i> mRNA | LD 12:12 | toc1-2             |        |
| [19] Huang, 2012 | S7   | <i>PRR9</i> mRNA | LL 12:12 | TOC1-ox            |        |
| [19] Huang, 2012 | S7   | <i>PRR9</i> mRNA | LL 12:12 | wt                 |        |
| [19] Huang, 2012 | S7   | <i>PRR7</i> mRNA | LL 12:12 | TOC1-ox            |        |
| [19] Huang, 2012 | S7   | <i>PRR7</i> mRNA | LL 12:12 | wt                 |        |
| [19] Huang, 2012 | S7   | <i>LHY</i> mRNA  | LL 12:12 | TOC1-ox            |        |
| [19] Huang, 2012 | S7   | <i>LHY</i> mRNA  | LL 12:12 | wt                 |        |

| Ref.                   | Fig. | Reporter         | Light    | Mutant / Comment         | Weight |
|------------------------|------|------------------|----------|--------------------------|--------|
| [19] Huang, 2012       | S7   | <i>CCA1</i> mRNA | LL 12:12 | TOC1-ox                  |        |
| [19] Huang, 2012       | S7   | <i>CCA1</i> mRNA | LL 12:12 | wt                       |        |
| [19] Huang, 2012       | S8B  | <i>LUX</i> mRNA  | LD 12:12 | wt, LUX::LUC             |        |
| [19] Huang, 2012       | S8C  | <i>LUX</i> mRNA  | LL 12:12 | wt, LUX::LUC             |        |
| [19] Huang, 2012       | S8D  | <i>LUX</i> mRNA  | LD 12:12 | TOC1-ox, LUX::LUC        |        |
| [19] Huang, 2012       | S8D  | <i>LUX</i> mRNA  | LD 12:12 | wt, LUX::LUC             |        |
| [20] Ito, 2008         | 2C   | <i>GI</i> mRNA   | LL 12:12 | toc1-2;pr5-11            |        |
| [20] Ito, 2008         | 2C   | <i>GI</i> mRNA   | LL 12:12 | toc1-2                   |        |
| [20] Ito, 2008         | 2C   | <i>GI</i> mRNA   | LL 12:12 | wt                       |        |
| [20] Ito, 2008         | 2C   | <i>CCA1</i> mRNA | LL 12:12 | toc1-2;pr5-11            |        |
| [20] Ito, 2008         | 2C   | <i>CCA1</i> mRNA | LL 12:12 | toc1-2                   |        |
| [20] Ito, 2008         | 2C   | <i>CCA1</i> mRNA | LL 12:12 | wt                       |        |
| [20] Ito, 2008         | 4    | <i>GI</i> mRNA   | LD 16:8  | toc1-2;pr5-11            |        |
| [20] Ito, 2008         | 4    | <i>GI</i> mRNA   | LD 16:8  | toc1-2                   |        |
| [20] Ito, 2008         | 4    | <i>GI</i> mRNA   | LD 16:8  | pr5-11                   |        |
| [20] Ito, 2008         | 4    | <i>GI</i> mRNA   | LD 16:8  | wt                       |        |
| [20] Ito, 2008         | 4G   | <i>LHY</i> mRNA  | LD 16:8  | pr5-11                   |        |
| [20] Ito, 2008         | 4G   | <i>LHY</i> mRNA  | LD 16:8  | wt                       |        |
| [20] Ito, 2008         | 4H   | <i>LHY</i> mRNA  | LD 16:8  | toc1-2;pr5-11            |        |
| [20] Ito, 2008         | 4H   | <i>LHY</i> mRNA  | LD 16:8  | toc1-2                   |        |
| [21] Kaczorowski, 2003 | 6A   | <i>CCA1</i> mRNA | LL 12:12 | wt, Red light entr       |        |
| [21] Kaczorowski, 2003 | 6A   | <i>CCA1</i> mRNA | LL 12:12 | pr7-1, Red light entr    |        |
| [21] Kaczorowski, 2003 | 6B   | <i>LHY</i> mRNA  | LL 12:12 | wt, Red light entr       |        |
| [21] Kaczorowski, 2003 | 6B   | <i>LHY</i> mRNA  | LL 12:12 | pr7-1, Red light entr    |        |
| [21] Kaczorowski, 2003 | 6C   | <i>TOC1</i> mRNA | LL 12:12 | wt, Red light entr       |        |
| [21] Kaczorowski, 2003 | 6C   | <i>TOC1</i> mRNA | LL 12:12 | pr7-1, Red light entr    |        |
| [22] Kiba, 2007        | 1B   | <i>PRR5</i> mRNA | LD 12:12 | wt                       |        |
| [22] Kiba, 2007        | 1B   | <i>PRR5</i> pr   | LD 12:12 | wt                       |        |
| [22] Kiba, 2007        | 1C   | <i>PRR5</i> mRNA | LL 12:12 | wt                       |        |
| [22] Kiba, 2007        | 1C   | <i>PRR5</i> pr   | LL 12:12 | wt                       |        |
| [22] Kiba, 2007        | 1D   | <i>PRR5</i> pr   | DD 12:12 | wt                       |        |
| [22] Kiba, 2007        | 1D   | <i>PRR5</i> mRNA | DD 12:12 | wt                       |        |
| [22] Kiba, 2007        | 1E   | <i>PRR5</i> mRNA | LD 16:8  | wt                       |        |
| [22] Kiba, 2007        | 1E   | <i>PRR5</i> pr   | LD 16:8  | wt                       |        |
| [22] Kiba, 2007        | 1F   | <i>PRR5</i> mRNA | LD 8:16  | wt                       |        |
| [22] Kiba, 2007        | 1F   | <i>PRR5</i> pr   | LD 8:16  | wt                       |        |
| [23] Kikis, 2005       | 3A   | <i>TOC1</i> mRNA | RR 12:12 | wt, Ws (DD to RR)        |        |
| [23] Kikis, 2005       | 3A   | <i>TOC1</i> mRNA | RR 12:12 | cca1-1;lhy-12 (DD to RR) |        |
| [23] Kikis, 2005       | 4A   | <i>CCA1</i> mRNA | RR 12:12 | wt, Col (DD to RR)       |        |
| [23] Kikis, 2005       | 4A   | <i>CCA1</i> mRNA | RR 12:12 | toc-101 (DD to RR)       |        |
| [23] Kikis, 2005       | 4C   | <i>LHY</i> mRNA  | RR 12:12 | wt, Col (DD to RR)       |        |
| [23] Kikis, 2005       | 4C   | <i>LHY</i> mRNA  | RR 12:12 | toc-101 (DD to RR)       |        |
| [23] Kikis, 2005       | 5A   | <i>CCA1</i> mRNA | RR 12:12 | wt, Col (DD to RR)       |        |
| [23] Kikis, 2005       | 5A   | <i>CCA1</i> mRNA | RR 12:12 | elf4-101 (DD to RR)      |        |
| [23] Kikis, 2005       | 5C   | <i>LHY</i> mRNA  | RR 12:12 | wt, Col (DD to RR)       |        |
| [23] Kikis, 2005       | 5C   | <i>LHY</i> mRNA  | RR 12:12 | elf4-101 (DD to RR)      |        |
| [23] Kikis, 2005       | 5E   | <i>TOC1</i> mRNA | RR 12:12 | wt, Col (DD to RR)       |        |
| [23] Kikis, 2005       | 5E   | <i>TOC1</i> mRNA | RR 12:12 | elf4-101 (DD to RR)      |        |
| [23] Kikis, 2005       | 6A   | <i>CCA1</i> mRNA | RR 12:12 | wt, Col (DD to RR)       |        |
| [23] Kikis, 2005       | 6A   | <i>CCA1</i> mRNA | RR 12:12 | elf3-1 (DD to RR)        |        |
| [23] Kikis, 2005       | 6C   | <i>LHY</i> mRNA  | RR 12:12 | wt, Col (DD to RR)       |        |
| [23] Kikis, 2005       | 6C   | <i>LHY</i> mRNA  | RR 12:12 | elf3-1 (DD to RR)        |        |
| [23] Kikis, 2005       | 6E   | <i>TOC1</i> mRNA | RR 12:12 | wt, Col (DD to RR)       |        |
| [23] Kikis, 2005       | 6E   | <i>TOC1</i> mRNA | RR 12:12 | elf3-1 (DD to RR)        |        |

| Ref.                | Fig. | Reporter         | Light    | Mutant / Comment         | Weight |
|---------------------|------|------------------|----------|--------------------------|--------|
| [23] Kikis, 2005    | 7A   | <i>ELF4</i> mRNA | RR 12:12 | wt, Col (DD to RR)       |        |
| [23] Kikis, 2005    | 7A   | <i>ELF4</i> mRNA | RR 12:12 | elf3-1 (DD to RR)        |        |
| [23] Kikis, 2005    | 7C   | <i>ELF3</i> mRNA | RR 12:12 | wt, Col (DD to RR)       |        |
| [23] Kikis, 2005    | 7C   | <i>ELF3</i> mRNA | RR 12:12 | elf4-101, (DD to RR)     |        |
| [23] Kikis, 2005    | 8A   | <i>ELF4</i> mRNA | RR 12:12 | wt, Ws (DD to RR)        |        |
| [23] Kikis, 2005    | 8A   | <i>ELF4</i> mRNA | RR 12:12 | cca1-1;lhy-12 (DD to RR) |        |
| [24] Kim, J-Y, 2003 | 3C   | <i>LHY</i> mRNA  | LD 12:12 | LHY-ox                   |        |
| [24] Kim, J-Y, 2003 | 3C   | <i>LHY</i> mRNA  | LD 12:12 | wt                       |        |
| [24] Kim, J-Y, 2003 | 3C   | LHY pr           | LD 12:12 | LHY-ox                   |        |
| [24] Kim, J-Y, 2003 | 3C   | LHY pr           | LD 12:12 | wt                       |        |
| [25] Kim, W-Y, 2005 | 5A   | <i>GI</i> mRNA   | LD 16:8  | wt, Col                  |        |
| [25] Kim, W-Y, 2005 | 5A   | <i>GI</i> mRNA   | LD 16:8  | elf3-1                   |        |
| [25] Kim, W-Y, 2005 | 5A   | <i>GI</i> mRNA   | LD 16:8  | E3-ox                    |        |
| [25] Kim, W-Y, 2005 | 5A   | <i>GI</i> mRNA   | LD 16:8  | elf3-1 ZTL-ox            |        |
| [25] Kim, W-Y, 2005 | 5A   | <i>GI</i> mRNA   | LD 16:8  | elf3-1;ztl-3             |        |
| [25] Kim, W-Y, 2005 | 5A   | <i>GI</i> mRNA   | LD 16:8  | ztl-3                    |        |
| [25] Kim, W-Y, 2005 | 5A   | <i>GI</i> mRNA   | LD 16:8  | ZTL-ox                   |        |
| [26] Kim, W-Y, 2007 | 1B   | ZTL pr           | LD 12:12 | GI-ox                    | 10     |
| [26] Kim, W-Y, 2007 | 1B   | ZTL pr           | LD 12:12 | gi-1                     | 10     |
| [26] Kim, W-Y, 2007 | 1B   | ZTL pr           | LD 12:12 | wt                       | 10     |
| [26] Kim, W-Y, 2007 | 1C   | GI pr            | LD 12:12 | wt                       |        |
| [26] Kim, W-Y, 2007 | 1C   | GI pr            | LD 12:12 | ztl-103                  |        |
| [26] Kim, W-Y, 2007 | 1C   | GI pr            | LD 12:12 | wt, cyt                  |        |
| [26] Kim, W-Y, 2007 | 1C   | GI pr            | LD 12:12 | ztl-103                  |        |
| [26] Kim, W-Y, 2007 | S5   | TOC1 pr          | LD 12:12 | wt, nuc                  |        |
| [26] Kim, W-Y, 2007 | S5   | TOc1 pr          | LD 12:12 | wt, cyt                  |        |
| [26] Kim, W-Y, 2007 | S5   | GI pr            | LD 12:12 | wt, nuc                  |        |
| [26] Kim, W-Y, 2007 | 2F   | ZTL pr           | LD 12:12 | ztl-21                   | 10     |
| [26] Kim, W-Y, 2007 | 2F   | ZTL pr           | LD 12:12 | wt                       | 10     |
| [26] Kim, W-Y, 2007 | 4A   | TOC1 pr          | LD 12:12 | gi-2                     |        |
| [26] Kim, W-Y, 2007 | 4A   | TOC1 pr          | LD 12:12 | wt                       |        |
| [26] Kim, W-Y, 2007 | 4B   | <i>TOC1</i> mRNA | LD 12:12 | gi-2                     |        |
| [26] Kim, W-Y, 2007 | 4B   | <i>TOC1</i> mRNA | LD 12:12 | wt                       |        |
| [27] Kim, Y. 2013   | 2A   | <i>LHY</i> mRNA  | LD 16:8  | wt                       |        |
| [27] Kim, Y. 2013   | 2A   | <i>LHY</i> mRNA  | LD 16:8  | gi-2                     |        |
| [27] Kim, Y. 2013   | 2A   | <i>LHY</i> mRNA  | LD 16:8  | GI-NLS                   |        |
| [27] Kim, Y. 2013   | 2A   | <i>LHY</i> mRNA  | LD 16:8  | GI-NES                   |        |
| [27] Kim, Y. 2013   | 2B   | <i>LHY</i> mRNA  | LL 12:12 | wt                       |        |
| [27] Kim, Y. 2013   | 2B   | <i>LHY</i> mRNA  | LL 12:12 | gi-2                     |        |
| [27] Kim, Y. 2013   | 2B   | <i>LHY</i> mRNA  | LL 12:12 | GI-NLS                   |        |
| [27] Kim, Y. 2013   | 2B   | <i>LHY</i> mRNA  | LL 12:12 | GI-NES                   |        |
| [27] Kim, Y. 2013   | 4F   | GI pr (N)        | LD 16:8  | wt                       |        |
| [27] Kim, Y. 2013   | 4F   | GI pr (C)        | LD 16:8  | wt                       |        |
| [27] Kim, Y. 2013   | 4F   | GI pr (N)        | LD 16:8  | GI-constitutive          |        |
| [27] Kim, Y. 2013   | 4F   | GI pr (C)        | LD 16:8  | GI-constitutive          |        |
| [27] Kim, Y. 2013   | 4G   | <i>LHY</i> mRNA  | LD 16:8  | GI-constitutive          |        |
| [27] Kim, Y. 2013   | S1B  | <i>GI</i> mRNA   | LD 16:8  | wt                       |        |
| [27] Kim, Y. 2013   | S1B  | <i>GI</i> mRNA   | LD 16:8  | GI-NES (GI in cyt)       |        |
| [27] Kim, Y. 2013   | S1B  | <i>GI</i> mRNA   | LD 16:8  | GI-NLS (GI in nuc)       |        |
| [27] Kim, Y. 2013   | S1C  | GI pr            | LD 16:8  | GI-NLS                   |        |
| [27] Kim, Y. 2013   | S1C  | GI pr            | LD 16:8  | GI-NES                   |        |
| [27] Kim, Y. 2013   | S2A  | <i>TOC1</i> mRNA | LD 16:8  | wt                       |        |
| [27] Kim, Y. 2013   | S2A  | <i>TOC1</i> mRNA | LD 16:8  | gi-2                     |        |
| [27] Kim, Y. 2013   | S2A  | <i>TOC1</i> mRNA | LD 16:8  | GI-NLS                   |        |



| Ref.              | Fig. | Reporter         | Light    | Mutant / Comment | Weight |
|-------------------|------|------------------|----------|------------------|--------|
| [27] Kim, Y. 2013 | S2A  | <i>TOC1</i> mRNA | LD 16:8  | GI-NES           |        |
| [27] Kim, Y. 2013 | S6   | <i>LHY</i> mRNA  | LD 8:16  | wt Ler           |        |
| [27] Kim, Y. 2013 | S6   | <i>LHY</i> mRNA  | LD 8:16  | lhy-mutant       |        |
| [28] Kolmos, 2009 | 4A   | <i>CCA1</i> mRNA | LD 12:12 | wt               |        |
| [28] Kolmos, 2009 | 4A   | <i>CCA1</i> mRNA | LD 12:12 | elf4-207         |        |
| [28] Kolmos, 2009 | 4A   | <i>CCA1</i> mRNA | DD 12:12 | wt, Col-0        | 0.1    |
| [28] Kolmos, 2009 | 4A   | <i>CCA1</i> mRNA | DD 12:12 | elf4-207         | 0.1    |
| [28] Kolmos, 2009 | 4A   | <i>CCA1</i> mRNA | LL 12:12 | elf4-207         |        |
| [28] Kolmos, 2009 | 4A   | <i>CCA1</i> mRNA | LL 12:12 | Col-0, wt        |        |
| [28] Kolmos, 2009 | 4B   | <i>LHY</i> mRNA  | LD 12:12 | elf4-207         |        |
| [28] Kolmos, 2009 | 4B   | <i>LHY</i> mRNA  | LD 12:12 | Col-0, wt        |        |
| [28] Kolmos, 2009 | 4B   | <i>LHY</i> mRNA  | DD 12:12 | wt, Col-0        | 0.1    |
| [28] Kolmos, 2009 | 4B   | <i>LHY</i> mRNA  | DD 12:12 | elf4-207         | 0.1    |
| [28] Kolmos, 2009 | 4B   | <i>LHY</i> mRNA  | LL 12:12 | elf4-207         |        |
| [28] Kolmos, 2009 | 4B   | <i>LHY</i> mRNA  | LL 12:12 | Col-0, wt        |        |
| [28] Kolmos, 2009 | 4C   | <i>PRR9</i> mRNA | LD 12:12 | elf4-207         |        |
| [28] Kolmos, 2009 | 4C   | <i>PRR9</i> mRNA | LD 12:12 | Col-0, wt        |        |
| [28] Kolmos, 2009 | 4C   | <i>PRR9</i> mRNA | DD 12:12 | wt               | 0.1    |
| [28] Kolmos, 2009 | 4C   | <i>PRR9</i> mRNA | DD 12:12 | elf4-207         | 0.1    |
| [28] Kolmos, 2009 | 4C   | <i>PRR9</i> mRNA | LL 12:12 | Col-0, wt        |        |
| [28] Kolmos, 2009 | 4C   | <i>PRR9</i> mRNA | LL 12:12 | elf4-207         |        |
| [28] Kolmos, 2009 | 4D   | <i>PRR7</i> mRNA | LD 12:12 | elf4-207         |        |
| [28] Kolmos, 2009 | 4D   | <i>PRR7</i> mRNA | LD 12:12 | Col-0, wt        |        |
| [28] Kolmos, 2009 | 4D   | <i>PRR7</i> mRNA | DD 12:12 | wt, Col-0        | 0.1    |
| [28] Kolmos, 2009 | 4D   | <i>PRR7</i> mRNA | DD 12:12 | elf4-207         | 0.1    |
| [28] Kolmos, 2009 | 4D   | <i>PRR7</i> mRNA | LL 12:12 | elf4-207         |        |
| [28] Kolmos, 2009 | 4D   | <i>PRR7</i> mRNA | LL 12:12 | Col-0, wt        |        |
| [28] Kolmos, 2009 | 4E   | <i>GI</i> mRNA   | LD 12:12 | elf4-207         |        |
| [28] Kolmos, 2009 | 4E   | <i>GI</i> mRNA   | LD 12:12 | Col-0, wt        |        |
| [28] Kolmos, 2009 | 4E   | <i>GI</i> mRNA   | DD 12:12 | wt, Col-0        | 0.1    |
| [28] Kolmos, 2009 | 4E   | <i>GI</i> mRNA   | DD 12:12 | elf4-207         | 0.1    |
| [28] Kolmos, 2009 | 4E   | <i>GI</i> mRNA   | LL 12:12 | elf4-207         |        |
| [28] Kolmos, 2009 | 4E   | <i>GI</i> mRNA   | LL 12:12 | Col-0, wt        |        |
| [28] Kolmos, 2009 | 4F   | <i>TOC1</i> mRNA | LD 12:12 | elf4-207         |        |
| [28] Kolmos, 2009 | 4F   | <i>TOC1</i> mRNA | LD 12:12 | Col-0, wt        |        |
| [28] Kolmos, 2009 | 4F   | <i>TOC1</i> mRNA | DD 12:12 | wt               | 0.1    |
| [28] Kolmos, 2009 | 4F   | <i>TOC1</i> mRNA | DD 12:12 | elf4-207         | 0.1    |
| [28] Kolmos, 2009 | 4F   | <i>TOC1</i> mRNA | LL 12:12 | elf4-207         |        |
| [28] Kolmos, 2009 | 4F   | <i>TOC1</i> mRNA | LL 12:12 | Col-0, wt        |        |
| [28] Kolmos, 2009 | 4G   | <i>LUX</i> mRNA  | LD 12:12 | elf4-207         |        |
| [28] Kolmos, 2009 | 4G   | <i>LUX</i> mRNA  | LD 12:12 | Col-0, wt        |        |
| [28] Kolmos, 2009 | 4G   | <i>LUX</i> mRNA  | DD 12:12 | wt               | 0.1    |
| [28] Kolmos, 2009 | 4G   | <i>LUX</i> mRNA  | DD 12:12 | elf4-207         | 0.1    |
| [28] Kolmos, 2009 | 4G   | <i>LUX</i> mRNA  | LL 12:12 | elf4-207         |        |
| [28] Kolmos, 2009 | 4G   | <i>LUX</i> mRNA  | LL 12:12 | Col-0, wt        |        |
| [29] Lau, 2011    | 3C   | <i>TOC1</i> mRNA | LL 16:8  | Col              |        |
| [29] Lau, 2011    | 3C   | <i>TOC1</i> mRNA | LL 16:8  | det1-1           |        |
| [29] Lau, 2011    | 4A   | <i>TOC1</i> mRNA | LL 16:8  | CCA1-ox          |        |
| [29] Lau, 2011    | 4A   | <i>TOC1</i> mRNA | LL 16:8  | det1-1;CCA1-ox   |        |
| [29] Lau, 2011    | 3D   | <i>GI</i> mRNA   | LL 16:8  | Col              |        |
| [29] Lau, 2011    | 3D   | <i>GI</i> mRNA   | LL 16:8  | det1-1           |        |
| [29] Lau, 2011    | 4B   | <i>GI</i> mRNA   | LL 16:8  | CCA1-ox          |        |
| [29] Lau, 2011    | 4B   | <i>GI</i> mRNA   | LL 16:8  | det1-1;CCA1-ox   |        |
| [29] Lau, 2011    | S2B  | LHY pr           | LL 16:8  | Col wt           |        |

| Ref.                       | Fig. | Reporter         | Light    | Mutant / Comment | Weight |
|----------------------------|------|------------------|----------|------------------|--------|
| [29] Lau, 2011             | S2B  | LHY pr           | LL 16:8  | det1-1           |        |
| [29] Lau, 2011             | S2C  | <i>LHY</i> mRNA  | LL 16:8  | Col wt           |        |
| [29] Lau, 2011             | S2C  | <i>LHY</i> mRNA  | LL 16:8  | det1-1           |        |
| [29] Lau, 2011             | S2D  | <i>CCA1</i> mRNA | LL 16:8  | Col wt           |        |
| [29] Lau, 2011             | S2D  | <i>CCA1</i> mRNA | LL 16:8  | det1-1           |        |
| [30] Li, 2011              | 3D   | <i>ELF4</i> mRNA | LL 12:12 | Col-0, wt        |        |
| [30] Li, 2011              | 3D   | <i>ELF4</i> mRNA | LL 12:12 | CCA1-ox          |        |
| [30] Li, 2011              | 5E   | <i>ELF4</i> mRNA | LD 12:12 | Ws               |        |
| [30] Li, 2011              | 5E   | <i>ELF4</i> mRNA | LD 12:12 | cca1;lhy         |        |
| [30] Li, 2011              | 5E   | <i>ELF4</i> mRNA | LL 12:12 | Ws               |        |
| [30] Li, 2011              | 5E   | <i>ELF4</i> mRNA | LL 12:12 | cca1;lhy         |        |
| [31] Liu, 2001             | 2C   | ELF3 pr          | LL 12:12 | first plot       |        |
| [31] Liu, 2001             | 2C   | ELF3 pr          | LL 12:12 | second plot      |        |
| [32] Locke, 2005           | 6    | <i>GI</i> mRNA   | LL 12:12 | wt               |        |
| [32] Locke, 2005           | 6    | <i>GI</i> mRNA   | LL 12:12 | cca1;lhy         |        |
| [33] Lu, 2012              | 1    | <i>ELF3</i> mRNA | LL 12:12 | CCA1-ox          |        |
| [33] Lu, 2012              | 1    | <i>ELF3</i> mRNA | LL 12:12 | cca1-1           |        |
| [33] Lu, 2012              | 1    | <i>ELF3</i> mRNA | LL 12:12 | wt               |        |
| [33] Lu, 2012              | 1    | <i>CCA1</i> mRNA | LL 12:12 | ELF3-ox          |        |
| [33] Lu, 2012              | 1    | <i>CCA1</i> mRNA | LL 12:12 | elf3-1           |        |
| [33] Lu, 2012              | 1    | <i>CCA1</i> mRNA | LL 12:12 | wt               |        |
| [33] Lu, 2012              | 6    | <i>GI</i> mRNA   | LD 16:8  | wt               |        |
| [33] Lu, 2012              | 6    | <i>GI</i> mRNA   | LD 16:8  | elf3-1;C-ox      |        |
| [33] Lu, 2012              | 6    | <i>GI</i> mRNA   | LD 16:8  | elf3-1           |        |
| [33] Lu, 2012              | 6    | <i>GI</i> mRNA   | LD 16:8  | C-ox             |        |
| [33] Lu, 2012              | 7    | <i>GI</i> mRNA   | LD 8:16  | elf3;C-ox        |        |
| [33] Lu, 2012              | 7    | <i>GI</i> mRNA   | LD 8:16  | elf3             |        |
| [33] Lu, 2012              | 7    | <i>GI</i> mRNA   | LD 8:16  | C-ox             |        |
| [33] Lu, 2012              | 7    | <i>GI</i> mRNA   | LD 8:16  | wt               |        |
| [34] Martin-Tryon, 2007 5A |      | <i>CCA1</i> mRNA | LL 12:12 | Col              |        |
| [34] Martin-Tryon, 2007 5A |      | <i>CCA1</i> mRNA | LL 12:12 | gi-201           |        |
| [34] Martin-Tryon, 2007 5A |      | <i>CCA1</i> mRNA | LL 12:12 | toc1-2           |        |
| [34] Martin-Tryon, 2007 5B |      | <i>LHY</i> mRNA  | LL 12:12 | Col              |        |
| [34] Martin-Tryon, 2007 5B |      | <i>LHY</i> mRNA  | LL 12:12 | gi-201           |        |
| [34] Martin-Tryon, 2007 5B |      | <i>LHY</i> mRNA  | LL 12:12 | toc1-2           |        |
| [34] Martin-Tryon, 2007 5C |      | <i>TOC1</i> mRNA | LL 12:12 | Col              |        |
| [34] Martin-Tryon, 2007 5C |      | <i>TOC1</i> mRNA | LL 12:12 | gi-201           |        |
| [34] Martin-Tryon, 2007 5C |      | <i>TOC1</i> mRNA | LL 12:12 | toc1-2           |        |
| [34] Martin-Tryon, 2007 5D |      | <i>GI</i> mRNA   | LL 12:12 | Col              |        |
| [34] Martin-Tryon, 2007 5D |      | <i>GI</i> mRNA   | LL 12:12 | gi-201           |        |
| [34] Martin-Tryon, 2007 5D |      | <i>GI</i> mRNA   | LL 12:12 | toc1-2           |        |
| [35] Mas, 2003             | 2A   | TOC1 pr          | LD 12:12 | TMG              |        |
| [35] Mas, 2003             | 2B   | <i>TOC1</i> mRNA | LD 12:12 | TMG              |        |
| [35] Mas, 2003             | 2C   | TOC1 pr          | LD 12:12 | ztl-1 TMG        |        |
| [35] Mas, 2003             | 2D   | <i>TOC1</i> mRNA | LD 12:12 | ztl-1 TMG        |        |
| [35] Mas, 2003             | 3A   | TOC1 pr          | LL 12:12 | wt, TMG          |        |
| [35] Mas, 2003             | 3B   | <i>TOC1</i> mRNA | LL 12:12 | wt, TMG          |        |
| [36] Matsushika, 2000      | 7A   | <i>PRR9</i> mRNA | LD 16:8  | wt               |        |
| [36] Matsushika, 2000      | 7A   | <i>PRR7</i> mRNA | LD 16:8  | wt               |        |
| [36] Matsushika, 2000      | 7A   | <i>PRR5</i> mRNA | LD 16:8  | wt               |        |
| [36] Matsushika, 2000      | 7A   | <i>PRR3</i> mRNA | LD 16:8  | wt               |        |
| [36] Matsushika, 2000      | 7A   | <i>PRR1</i> mRNA | LD 16:8  | wt               |        |
| [36] Matsushika, 2000      | 7B   | <i>PRR9</i> mRNA | LD 12:12 | wt               |        |
| [36] Matsushika, 2000      | 7B   | <i>PRR7</i> mRNA | LD 12:12 | wt               |        |

| Ref. | Fig.             | Reporter | Light            | Mutant / Comment | Weight        |   |
|------|------------------|----------|------------------|------------------|---------------|---|
| [36] | Matsushika, 2000 | 7B       | <i>PRR5</i> mRNA | LD 12:12         | wt            |   |
| [36] | Matsushika, 2000 | 7B       | <i>PRR3</i> mRNA | LD 12:12         | wt            |   |
| [36] | Matsushika, 2000 | 7B       | <i>PRR1</i> mRNA | LD 12:12         | wt            |   |
| [36] | Matsushika, 2000 | 7C       | <i>PRR9</i> mRNA | LD 8:16          | wt            |   |
| [36] | Matsushika, 2000 | 7C       | <i>PRR7</i> mRNA | LD 8:16          | wt            |   |
| [36] | Matsushika, 2000 | 7C       | <i>PRR5</i> mRNA | LD 8:16          | wt            |   |
| [36] | Matsushika, 2000 | 7C       | <i>PRR3</i> mRNA | LD 8:16          | wt            |   |
| [36] | Matsushika, 2000 | 7C       | <i>PRR1</i> mRNA | LD 8:16          | wt            |   |
| [37] | Matsushika, 2002 | 3B       | <i>PRR9</i> mRNA | LL 12:12         | P9-ox         | 3 |
| [37] | Matsushika, 2002 | 3B       | <i>PRR9</i> mRNA | LL 12:12         | wt, Col       |   |
| [37] | Matsushika, 2002 | 3B       | <i>PRR7</i> mRNA | LL 12:12         | P9-ox         | 3 |
| [37] | Matsushika, 2002 | 3B       | <i>PRR7</i> mRNA | LL 12:12         | wt, Col       |   |
| [37] | Matsushika, 2002 | 3B       | <i>PRR5</i> mRNA | LL 12:12         | P9-ox         | 3 |
| [37] | Matsushika, 2002 | 3B       | <i>PRR5</i> mRNA | LL 12:12         | wt, Col       |   |
| [37] | Matsushika, 2002 | 3B       | <i>PRR1</i> mRNA | LL 12:12         | P9-ox         | 3 |
| [37] | Matsushika, 2002 | 3B       | <i>PRR1</i> mRNA | LL 12:12         | wt, Col       |   |
| [37] | Matsushika, 2002 | 4A       | <i>LHY</i> mRNA  | LL 12:12         | P9-ox         | 3 |
| [37] | Matsushika, 2002 | 4A       | <i>LHY</i> mRNA  | LL 12:12         | wt, Col       |   |
| [37] | Matsushika, 2002 | 4B       | <i>ELF3</i> mRNA | LL 12:12         | P9-ox         | 3 |
| [37] | Matsushika, 2002 | 4B       | <i>ELF3</i> mRNA | LL 12:12         | wt, Col       |   |
| [37] | Matsushika, 2002 | 4A       | <i>CCA1</i> mRNA | LL 12:12         | P9-ox         | 3 |
| [37] | Matsushika, 2002 | 4A       | <i>CCA1</i> mRNA | LL 12:12         | wt, Col       |   |
| [38] | McWatters, 2007  | 6G       | <i>ELF4</i> mRNA | LD 12:12         | wt C24        |   |
| [38] | McWatters, 2007  | 6G       | <i>ELF4</i> mRNA | LD 12:12         | toc1-1        |   |
| [38] | McWatters, 2007  | S2A      | <i>CCA1</i> mRNA | LL 12:12         | Ws            |   |
| [38] | McWatters, 2007  | S2A      | <i>CCA1</i> mRNA | LL 12:12         | elf4-1        |   |
| [38] | McWatters, 2007  | S2B      | <i>LHY</i> mRNA  | LL 12:12         | Ws            |   |
| [38] | McWatters, 2007  | S2B      | <i>LHY</i> mRNA  | LL 12:12         | elf4-1        |   |
| [38] | McWatters, 2007  | S2D      | <i>TOC1</i> mRNA | LL 12:12         | Ws            |   |
| [38] | McWatters, 2007  | S2D      | <i>TOC1</i> mRNA | LL 12:12         | elf4-1        |   |
| [38] | McWatters, 2007  | S1A      | <i>ELF4</i> mRNA | LL 12:12         | Ws            |   |
| [38] | McWatters, 2007  | S1A      | <i>ELF4</i> mRNA | LL 12:12         | ELF4-ox-11    |   |
| [39] | Mizoguchi, 2002  | 7C       | <i>GI</i> mRNA   | LD 16:8          | Ler           |   |
| [39] | Mizoguchi, 2002  | 7C       | <i>GI</i> mRNA   | LD 16:8          | lhy-12        |   |
| [39] | Mizoguchi, 2002  | 7C       | <i>GI</i> mRNA   | LD 16:8          | cca1-1        |   |
| [39] | Mizoguchi, 2002  | 7D       | <i>GI</i> mRNA   | LD 16:8          | cca1-1;lhy-12 |   |
| [39] | Mizoguchi, 2002  | 7E       | <i>TOC1</i> mRNA | LD 16:8          | Ler           |   |
| [39] | Mizoguchi, 2002  | 7E       | <i>TOC1</i> mRNA | LD 16:8          | lhy-12        |   |
| [39] | Mizoguchi, 2002  | 7E       | <i>TOC1</i> mRNA | LD 16:8          | cca1-1        |   |
| [39] | Mizoguchi, 2002  | 7F       | <i>TOC1</i> mRNA | LD 16:8          | cca1-1;lhy-12 |   |
| [39] | Mizoguchi, 2002  | 7K       | <i>LHY</i> mRNA  | LL 16:8          | Ler           |   |
| [39] | Mizoguchi, 2002  | 7K       | <i>LHY</i> mRNA  | LL 16:8          | gi-3          |   |
| [39] | Mizoguchi, 2002  | 7L       | <i>CCA1</i> mRNA | LL 16:8          | Ler           |   |
| [39] | Mizoguchi, 2002  | 7L       | <i>CCA1</i> mRNA | LL 16:8          | gi-3          |   |
| [39] | Mizoguchi, 2002  | 6C       | <i>GI</i> mRNA   | LL 16:8          | Ler           |   |
| [39] | Mizoguchi, 2002  | 6C       | <i>GI</i> mRNA   | LL 16:8          | lhy-12        |   |
| [39] | Mizoguchi, 2002  | 6C       | <i>GI</i> mRNA   | LL 16:8          | cca1-1        |   |
| [39] | Mizoguchi, 2002  | 6G       | <i>TOC1</i> mRNA | LL 16:8          | Ler           |   |
| [39] | Mizoguchi, 2002  | 6G       | <i>TOC1</i> mRNA | LL 16:8          | lhy-12        |   |
| [39] | Mizoguchi, 2002  | 6G       | <i>TOC1</i> mRNA | LL 16:8          | cca1-1        |   |
| [39] | Mizoguchi, 2002  | 6D       | <i>GI</i> mRNA   | LL 16:8          | lhy-12;cca1-1 |   |
| [39] | Mizoguchi, 2002  | 6H       | <i>TOC1</i> mRNA | LL 16:8          | lhy-12;cca1-1 |   |
| [39] | Mizoguchi, 2002  | 2C       | <i>CCA1</i> mRNA | LL 16:8          | wt            |   |
| [39] | Mizoguchi, 2002  | 2C       | <i>CCA1</i> mRNA | LL 16:8          | lhy-12        |   |

| Ref.                  | Fig. | Reporter         | Light    | Mutant / Comment        | Weight |
|-----------------------|------|------------------|----------|-------------------------|--------|
| [39] Mizoguchi, 2002  | 2D   | <i>LHY</i> mRNA  | LL 16:8  | wt                      |        |
| [39] Mizoguchi, 2002  | 2D   | <i>LHY</i> mRNA  | LL 16:8  | cca1-1                  |        |
| [40] Nakamichi, 2003  | 1    | <i>PRR9</i> mRNA | LD 12:12 | wt                      |        |
| [40] Nakamichi, 2003  | 1    | <i>PRR7</i> mRNA | LD 12:12 | wt                      |        |
| [40] Nakamichi, 2003  | 1    | <i>PRR5</i> mRNA | LD 12:12 | wt                      |        |
| [40] Nakamichi, 2003  | 1    | <i>PRR1</i> mRNA | LD 12:12 | wt                      |        |
| [40] Nakamichi, 2003  | 3    | <i>PRR1</i> mRNA | DD 12:12 | wt                      |        |
| [40] Nakamichi, 2003  | 3    | <i>PRR5</i> mRNA | DD 12:12 | wt                      |        |
| [40] Nakamichi, 2003  | 3    | <i>PRR7</i> mRNA | DD 12:12 | wt                      |        |
| [40] Nakamichi, 2003  | 3    | <i>PRR7</i> mRNA | DD 12:12 | wt                      |        |
| [40] Nakamichi, 2003  | 3    | <i>PRR9</i> mRNA | DD 12:12 | wt                      |        |
| [40] Nakamichi, 2003  | 4    | <i>CCA1</i> mRNA | DD 12:12 | wt                      |        |
| [40] Nakamichi, 2003  | 4    | <i>LHY</i> mRNA  | DD 12:12 | wt                      |        |
| [41] Nakamichi, 2005  | 4A   | <i>CCA1</i> mRNA | LL 12:12 | wt, Col                 |        |
| [41] Nakamichi, 2005  | 4A   | <i>CCA1</i> mRNA | LL 12:12 | prp5-11;prp7-11         |        |
| [41] Nakamichi, 2005  | 4B   | <i>LHY</i> mRNA  | LL 12:12 | wt, Col                 |        |
| [41] Nakamichi, 2005  | 4B   | <i>LHY</i> mRNA  | LL 12:12 | prp5-11;prp7-11         |        |
| [41] Nakamichi, 2005  | 4C   | <i>TOC1</i> mRNA | LL 12:12 | wt, Col                 |        |
| [41] Nakamichi, 2005  | 4C   | <i>TOC1</i> mRNA | LL 12:12 | prp5-11;prp7-11         |        |
| [41] Nakamichi, 2005  | 5A   | <i>CCA1</i> mRNA | DD 12:12 | wt, Col                 |        |
| [41] Nakamichi, 2005  | 5A   | <i>CCA1</i> mRNA | DD 12:12 | prp5-11;prp7-11         |        |
| [41] Nakamichi, 2005  | 5B   | <i>LHY</i> mRNA  | DD 12:12 | wt, Col                 |        |
| [41] Nakamichi, 2005  | 5B   | <i>LHY</i> mRNA  | DD 12:12 | prp5-11;prp7-11         |        |
| [41] Nakamichi, 2005  | 6A   | <i>CCA1</i> mRNA | LD 12:12 | wt, Col                 |        |
| [41] Nakamichi, 2005  | 6A   | <i>CCA1</i> mRNA | LD 12:12 | prp5-11;prp7-11         |        |
| [41] Nakamichi, 2005  | 6B   | <i>LHY</i> mRNA  | LD 12:12 | wt, Col                 |        |
| [41] Nakamichi, 2005  | 6B   | <i>LHY</i> mRNA  | LD 12:12 | prp5-11;prp7-11         |        |
| [41] Nakamichi, 2005  | 6C   | <i>TOC1</i> mRNA | LD 12:12 | wt, Col                 |        |
| [41] Nakamichi, 2005  | 6C   | <i>TOC1</i> mRNA | LD 12:12 | prp5-11;prp7-11         |        |
| [41] Nakamichi, 2005  | 6E   | <i>GI</i> mRNA   | LD 12:12 | wt, Col                 |        |
| [41] Nakamichi, 2005  | 6E   | <i>GI</i> mRNA   | LD 12:12 | prp5-11;prp7-11         |        |
| [42] Nakamichi, 2005b | 5A   | <i>CCA1</i> mRNA | LL 12:12 | wt, Col                 |        |
| [42] Nakamichi, 2005b | 5A   | <i>CCA1</i> mRNA | LL 12:12 | prp9-10;prp7-11;prp5-11 |        |
| [42] Nakamichi, 2005b | 5B   | <i>TOC1</i> mRNA | LL 12:12 | wt, Col                 |        |
| [42] Nakamichi, 2005b | 5B   | <i>TOC1</i> mRNA | LL 12:12 | prp9-10;prp7-11;prp5-11 |        |
| [42] Nakamichi, 2005b | 5C   | <i>GI</i> mRNA   | LL 12:12 | wt, Col                 |        |
| [42] Nakamichi, 2005b | 5C   | <i>GI</i> mRNA   | LL 12:12 | prp9-10;prp7-11;prp5-11 |        |
| [42] Nakamichi, 2005b | 6C   | <i>TOC1</i> mRNA | LD 12:12 | wt                      |        |
| [43] Nakamichi, 2010  | 6A   | <i>CCA1</i> mRNA | LD 12:12 | wt                      |        |
| [43] Nakamichi, 2010  | 6B   | PRR9 pr          | LD 12:12 | prp5;prp7               |        |
| [43] Nakamichi, 2010  | 6A   | PRR9 pr          | LD 12:12 | wt                      |        |
| [43] Nakamichi, 2010  | 6A   | PRR7 pr          | LD 12:12 | wt                      |        |
| [43] Nakamichi, 2010  | 6C   | PRR5 pr          | LD 12:12 | prp7;prp9               |        |
| [43] Nakamichi, 2010  | 6A   | PRR5 pr          | LD 12:12 | wt                      |        |
| [43] Nakamichi, 2010  | 6C   | <i>LHY</i> mRNA  | LD 12:12 | prp7;prp9               |        |
| [43] Nakamichi, 2010  | 6B   | <i>LHY</i> mRNA  | LD 12:12 | prp5;prp7               |        |
| [43] Nakamichi, 2010  | 6A   | <i>LHY</i> mRNA  | LD 12:12 | wt                      |        |
| [43] Nakamichi, 2010  | 6B   | <i>CCA1</i> mRNA | LD 12:12 | prp5;prp7               |        |
| [43] Nakamichi, 2010  | 6C   | <i>CCA1</i> mRNA | LD 12:12 | prp7;prp9               |        |
| [44] Nakamichi, 2012  | S4B  | <i>LHY</i> mRNA  | LL 12:12 | wt                      |        |
| [44] Nakamichi, 2012  | S4B  | <i>LHY</i> mRNA  | LL 12:12 | P5-ox                   | 3      |
| [44] Nakamichi, 2012  | S4B  | <i>PRR9</i> mRNA | LL 12:12 | wt                      |        |
| [44] Nakamichi, 2012  | S4B  | <i>PRR7</i> mRNA | LL 12:12 | wt                      |        |
| [45] Niwa, 2007       | 6L   | <i>GI</i> mRNA   | LD 10:14 | wt                      |        |

| Ref.               | Fig. | Reporter         | Light    | Mutant / Comment     | Weight |
|--------------------|------|------------------|----------|----------------------|--------|
| [45] Niwa, 2007    | 6L   | <i>GI</i> mRNA   | LD 10:14 | toc1-2;cca1-1        |        |
| [45] Niwa, 2007    | 6R   | <i>GI</i> mRNA   | LD 10:14 | wt                   |        |
| [45] Niwa, 2007    | 6R   | <i>GI</i> mRNA   | LD 10:14 | toc1-2;cca1-1        |        |
| [45] Niwa, 2007    | 8    | <i>GI</i> mRNA   | LD 10:14 | toc1-2;cca1-1;lhy-11 |        |
| [45] Niwa, 2007    | 8    | <i>GI</i> mRNA   | LD 10:14 | cca1-1;lhy-11        |        |
| [45] Niwa, 2007    | 8    | <i>GI</i> mRNA   | LD 10:14 | wt                   |        |
| [46] Nusinow, 2011 | 1    | <i>ELF3</i> mRNA | LL 12:12 | wt                   |        |
| [46] Nusinow, 2011 | 1    | <i>ELF4</i> mRNA | LL 12:12 | wt                   |        |
| [46] Nusinow, 2011 | 1    | <i>LUX</i> mRNA  | LL 12:12 | wt                   |        |
| [46] Nusinow, 2011 | S11  | <i>ELF4</i> mRNA | LD 8:16  | wt                   |        |
| [46] Nusinow, 2011 | S11  | <i>ELF4</i> mRNA | LD 8:16  | lhy-1 (-ox)          |        |
| [46] Nusinow, 2011 | S11  | <i>ELF3</i> mRNA | LD 8:16  | wt                   |        |
| [46] Nusinow, 2011 | S11  | <i>ELF3</i> mRNA | LD 8:16  | lhy-1 (-ox)          |        |
| [46] Nusinow, 2011 | S11  | <i>LUX</i> mRNA  | LD 8:16  | wt                   |        |
| [46] Nusinow, 2011 | S11  | <i>LUX</i> mRNA  | LD 8:16  | lhy-1 (-ox)          |        |
| [47] Onai, 2005    | 1D   | <i>GI</i> mRNA   | LL 12:12 | wt                   |        |
| [47] Onai, 2005    | 1D   | <i>GI</i> mRNA   | LL 12:12 | lux (pcl1-1)         |        |
| [47] Onai, 2005    | 1F   | <i>TOC1</i> mRNA | LL 12:12 | wt                   |        |
| [47] Onai, 2005    | 1F   | <i>TOC1</i> mRNA | LL 12:12 | lux (pcl1-1)         |        |
| [47] Onai, 2005    | 1G   | <i>ELF4</i> mRNA | LL 12:12 | wt                   |        |
| [47] Onai, 2005    | 1G   | <i>ELF4</i> mRNA | LL 12:12 | lux (pcl1-1)         |        |
| [47] Onai, 2005    | 1H   | <i>CCA1</i> mRNA | LL 12:12 | wt                   |        |
| [47] Onai, 2005    | 1H   | <i>CCA1</i> mRNA | LL 12:12 | lux (pcl1-1)         |        |
| [47] Onai, 2005    | 1I   | <i>LHY</i> mRNA  | LL 12:12 | wt                   |        |
| [47] Onai, 2005    | 1I   | <i>LHY</i> mRNA  | LL 12:12 | lux (pcl1-1)         |        |
| [47] Onai, 2005    | 6A   | <i>LUX</i> mRNA  | LL 12:12 | wt                   |        |
| [47] Onai, 2005    | 6A   | <i>LUX</i> mRNA  | LL 12:12 | lux (pcl1-1)         |        |
| [47] Onai, 2005    | 6G   | <i>LUX</i> mRNA  | LL 12:12 | wt                   |        |
| [47] Onai, 2005    | 6G   | <i>LUX</i> mRNA  | LL 12:12 | lux (pcl1-1)         |        |
| [47] Onai, 2005    | 6G   | <i>LUX</i> mRNA  | LL 12:12 | LUX-ox               |        |
| [47] Onai, 2005    | 7A   | <i>LUX</i> mRNA  | LL 12:12 | wt                   |        |
| [47] Onai, 2005    | 7A   | <i>LUX</i> mRNA  | LL 12:12 | lux (pcl1-1)         |        |
| [47] Onai, 2005    | 7A   | <i>LUX</i> mRNA  | LL 12:12 | LUX-ox               |        |
| [47] Onai, 2005    | 7B   | <i>GI</i> mRNA   | LL 12:12 | wt                   |        |
| [47] Onai, 2005    | 7B   | <i>GI</i> mRNA   | LL 12:12 | lux (pcl1-1)         |        |
| [47] Onai, 2005    | 7B   | <i>GI</i> mRNA   | LL 12:12 | LUX-ox               |        |
| [47] Onai, 2005    | 7C   | <i>TOC1</i> mRNA | LL 12:12 | wt                   |        |
| [47] Onai, 2005    | 7C   | <i>TOC1</i> mRNA | LL 12:12 | lux (pcl1-1)         |        |
| [47] Onai, 2005    | 7C   | <i>TOC1</i> mRNA | LL 12:12 | LUX-ox               |        |
| [47] Onai, 2005    | 7D   | <i>ELF4</i> mRNA | LL 12:12 | wt                   |        |
| [47] Onai, 2005    | 7D   | <i>ELF4</i> mRNA | LL 12:12 | lux (pcl1-1)         |        |
| [47] Onai, 2005    | 7D   | <i>ELF4</i> mRNA | LL 12:12 | LUX-ox               |        |
| [47] Onai, 2005    | 7E   | <i>CCA1</i> mRNA | LL 12:12 | wt                   |        |
| [47] Onai, 2005    | 7E   | <i>CCA1</i> mRNA | LL 12:12 | lux (pcl1-1)         |        |
| [47] Onai, 2005    | 7E   | <i>CCA1</i> mRNA | LL 12:12 | LUX-ox               |        |
| [47] Onai, 2005    | 7F   | <i>LHY</i> mRNA  | LL 12:12 | wt                   |        |
| [47] Onai, 2005    | 7F   | <i>LHY</i> mRNA  | LL 12:12 | lux (pcl1-1)         |        |
| [47] Onai, 2005    | 7F   | <i>LHY</i> mRNA  | LL 12:12 | LUX-ox               |        |
| [48] Park, 1999    | 3A   | <i>GI</i> mRNA   | LL 12:12 | wt, Col              |        |
| [48] Park, 1999    | 3A   | <i>GI</i> mRNA   | LL 12:12 | gi-1                 |        |
| [48] Park, 1999    | 3A   | <i>GI</i> mRNA   | LL 12:12 | gi-2                 |        |
| [48] Park, 1999    | 3A   | <i>CCA1</i> mRNA | LL 12:12 | wt, Col              |        |
| [48] Park, 1999    | 3A   | <i>CCA1</i> mRNA | LL 12:12 | gi-1                 |        |
| [48] Park, 1999    | 3A   | <i>CCA1</i> mRNA | LL 12:12 | gi-2                 |        |

| Ref.                | Fig. | Reporter         | Light     | Mutant / Comment | Weight |
|---------------------|------|------------------|-----------|------------------|--------|
| [48] Park, 1999     | 3A   | <i>LHY</i> mRNA  | LL 12:12  | wt, Col          |        |
| [48] Park, 1999     | 3A   | <i>LHY</i> mRNA  | LL 12:12  | gi-1             |        |
| [48] Park, 1999     | 3A   | <i>LHY</i> mRNA  | LL 12:12  | gi-2             |        |
| [48] Park, 1999     | 3B   | <i>LHY</i> mRNA  | DD 12:12  | wt, Col          |        |
| [48] Park, 1999     | 3B   | <i>LHY</i> mRNA  | DD 12:12  | gi-1             |        |
| [48] Park, 1999     | 3B   | <i>LHY</i> mRNA  | DD 12:12  | gi-2             |        |
| [48] Park, 1999     | 3B   | <i>GI</i> mRNA   | DD 12:12  | wt, Col          |        |
| [48] Park, 1999     | 3B   | <i>GI</i> mRNA   | DD 12:12  | gi-1             |        |
| [48] Park, 1999     | 3B   | <i>GI</i> mRNA   | DD 12:12  | gi-2             |        |
| [49] Pokhilko, 2012 | 2A   | <i>TOC1</i> mRNA | LD 12:12  | wt               |        |
| [49] Pokhilko, 2012 | 2A   | <i>TOC1</i> mRNA | LD 12:12  | cca1;lhy         |        |
| [49] Pokhilko, 2012 | 2B   | <i>LUX</i> mRNA  | LD 12:12  | wt               |        |
| [49] Pokhilko, 2012 | 2B   | <i>LUX</i> mRNA  | LD 12:12  | cca1;lhy         |        |
| [49] Pokhilko, 2012 | 3C   | <i>TOC1</i> mRNA | LD 12:12  | cca1;lhy;gi      |        |
| [49] Pokhilko, 2012 | 3C   | <i>TOC1</i> mRNA | LD 12:12  | cca1;lhy         |        |
| [49] Pokhilko, 2012 | 3D   | <i>LUX</i> mRNA  | LD 12:12  | cca1;lhy;gi      |        |
| [49] Pokhilko, 2012 | 3D   | <i>LUX</i> mRNA  | LD 12:12  | cca1;lhy         |        |
| [49] Pokhilko, 2012 | 5A   | <i>CCA1</i> mRNA | LD 12:12  | wt               |        |
| [49] Pokhilko, 2012 | 5A   | <i>CCA1</i> mRNA | LD 12:12  | toc1             |        |
| [49] Pokhilko, 2012 | 5A   | <i>CCA1</i> mRNA | LD 12:12  | T-ox             |        |
| [49] Pokhilko, 2012 | 5B   | <i>LHY</i> mRNA  | LD 12:12  | wt               |        |
| [49] Pokhilko, 2012 | 5B   | <i>LHY</i> mRNA  | LD 12:12  | toc1             |        |
| [49] Pokhilko, 2012 | 5B   | <i>LHY</i> mRNA  | LD 12:12  | T-ox             |        |
| [50] Rawat, 2011    | 4B   | RVE8 pr          | LL 12:12  | wt               |        |
| [50] Rawat, 2011    | 6A   | <i>CCA1</i> mRNA | LL 12:12  | wt Col           |        |
| [50] Rawat, 2011    | 6A   | <i>CCA1</i> mRNA | LL 12:12  | rve8-1           |        |
| [50] Rawat, 2011    | 6A   | <i>CCA1</i> mRNA | LL 12:12  | RVE8-ox          |        |
| [50] Rawat, 2011    | 6B   | <i>LHY</i> mRNA  | LL 12:12  | wt Col           |        |
| [50] Rawat, 2011    | 6B   | <i>LHY</i> mRNA  | LL 12:12  | rve8-1           |        |
| [50] Rawat, 2011    | 6B   | <i>LHY</i> mRNA  | LL 12:12  | RVE8-ox          |        |
| [50] Rawat, 2011    | 6C   | <i>TOC1</i> mRNA | LL 12:12  | wt Col           |        |
| [50] Rawat, 2011    | 6C   | <i>TOC1</i> mRNA | LL 12:12  | rve8-1           |        |
| [50] Rawat, 2011    | 6C   | <i>TOC1</i> mRNA | LL 12:12  | RVE8-ox          |        |
| [50] Rawat, 2011    | 6D   | <i>CCA1</i> mRNA | LL 12:12  | rve8-1;RVE8-ox   |        |
| [50] Rawat, 2011    | 6E   | <i>LHY</i> mRNA  | LL 12:12  | rve8-1;RVE8-ox   |        |
| [50] Rawat, 2011    | 6F   | <i>TOC1</i> mRNA | LL 12:12  | rve8-1;RVE8-ox   |        |
| [50] Rawat, 2011    | 8C   | <i>PRR5</i> mRNA | LL 12:12  | wt Col           |        |
| [50] Rawat, 2011    | 8C   | <i>PRR5</i> mRNA | LL 12:12  | rve8-1           |        |
| [50] Rawat, 2011    | 8C   | <i>PRR5</i> mRNA | LL 12:12  | RVE8-ox          |        |
| [50] Rawat, 2011    | 8D   | <i>TOC1</i> mRNA | LL 12:12  | wt Col           |        |
| [50] Rawat, 2011    | 8D   | <i>TOC1</i> mRNA | LL 12:12  | rve8-1           |        |
| [50] Rawat, 2011    | 8D   | <i>TOC1</i> mRNA | LL 12:12  | RVE8-ox          |        |
| [50] Rawat, 2011    | 8G   | <i>RVE8</i> mRNA | LL 12:12? | Col              |        |
| [50] Rawat, 2011    | 8G   | <i>RVE8</i> mRNA | LL 12:12? | prp9;prp7;prp5   |        |
| [50] Rawat, 2011    | 8E   | <i>PRR7</i> mRNA | LL 12:12  | wt Col           |        |
| [50] Rawat, 2011    | 8E   | <i>PRR7</i> mRNA | LL 12:12  | rve8-1           |        |
| [50] Rawat, 2011    | 8E   | <i>PRR7</i> mRNA | LL 12:12  | RVE8-ox          |        |
| [50] Rawat, 2011    | S1A  | <i>RVE8</i> mRNA | LL 12:12  | Col              |        |
| [50] Rawat, 2011    | S1A  | <i>RVE8</i> mRNA | LL 12:12  | RVE8-ox          |        |
| [50] Rawat, 2011    | S1B  | <i>RVE8</i> mRNA | LL 12:12  | rve8-1           |        |
| [51] Sato, 2002     | 2B   | <i>GI</i> mRNA   | LL 12:12  | wt, Col          |        |
| [51] Sato, 2002     | 2B   | <i>GI</i> mRNA   | LL 12:12  | P5-ox            | 3      |
| [51] Sato, 2002     | 3    | <i>CCA1</i> mRNA | LL 12:12  | wt, Col          |        |
| [51] Sato, 2002     | 3    | <i>CCA1</i> mRNA | LL 12:12  | P5-ox            | 3      |

| Ref.              | Fig. | Reporter         | Light    | Mutant / Comment | Weight |
|-------------------|------|------------------|----------|------------------|--------|
| [51] Sato, 2002   | 3    | <i>LHY</i> mRNA  | LL 12:12 | wt, Col          |        |
| [51] Sato, 2002   | 3    | <i>LHY</i> mRNA  | LL 12:12 | P5-ox            | 3      |
| [51] Sato, 2002   | 4    | <i>PRR9</i> mRNA | LL 12:12 | wt, Col          |        |
| [51] Sato, 2002   | 4    | <i>PRR9</i> mRNA | LL 12:12 | P5-ox            | 3      |
| [51] Sato, 2002   | 4    | <i>PRR7</i> mRNA | LL 12:12 | wt, Col          |        |
| [51] Sato, 2002   | 4    | <i>PRR7</i> mRNA | LL 12:12 | P5-ox            | 3      |
| [51] Sato, 2002   | 4    | <i>PRR5</i> mRNA | LL 12:12 | wt, Col          |        |
| [51] Sato, 2002   | 4    | <i>PRR5</i> mRNA | LL 12:12 | P5-ox            | 3      |
| [51] Sato, 2002   | 4    | <i>PRR1</i> mRNA | LL 12:12 | wt, Col          |        |
| [51] Sato, 2002   | 4    | <i>PRR1</i> mRNA | LL 12:12 | P5-ox            | 3      |
| [52] Somers, 2004 | 9A   | <i>CCA1</i> mRNA | LD 12:12 | wt               |        |
| [52] Somers, 2004 | 9A   | <i>CCA1</i> mRNA | LD 12:12 | Z-ox             |        |
| [52] Somers, 2004 | 9A   | <i>CCA1</i> mRNA | LD 12:12 | ztl-1            |        |
| [52] Somers, 2004 | 9A   | <i>CCA1</i> mRNA | LD 12:12 | ztl-2            |        |
| [52] Somers, 2004 | 9A   | <i>CCA1</i> mRNA | LD 12:12 | ztl-3            |        |
| [52] Somers, 2004 | 9A   | <i>CCA1</i> mRNA | LD 12:12 | wt               |        |
| [52] Somers, 2004 | 9A   | <i>CCA1</i> mRNA | LL 12:12 | wt, Col          |        |
| [52] Somers, 2004 | 9A   | <i>CCA1</i> mRNA | LL 12:12 | wt, C24          |        |
| [52] Somers, 2004 | 9A   | <i>CCA1</i> mRNA | LL 12:12 | ztl-1, C24       |        |
| [52] Somers, 2004 | 9A   | <i>CCA1</i> mRNA | LL 12:12 | ztl-2, C24       |        |
| [52] Somers, 2004 | 9A   | <i>CCA1</i> mRNA | LL 12:12 | ztl-3, Col       |        |
| [52] Somers, 2004 | 9A   | <i>CCA1</i> mRNA | LL 12:12 | Z-ox             |        |
| [52] Somers, 2004 | 9B   | <i>TOC1</i> mRNA | LL 12:12 | wt, C24          |        |
| [52] Somers, 2004 | 9B   | <i>TOC1</i> mRNA | LL 12:12 | wt, Col          |        |
| [52] Somers, 2004 | 9B   | <i>TOC1</i> mRNA | LL 12:12 | ztl-1, C24       |        |
| [52] Somers, 2004 | 9B   | <i>TOC1</i> mRNA | LL 12:12 | ztl-2, C24       |        |
| [52] Somers, 2004 | 9B   | <i>TOC1</i> mRNA | LL 12:12 | ztl-3, Col       |        |
| [52] Somers, 2004 | 9B   | <i>TOC1</i> mRNA | LL 12:12 | Z-ox             |        |
| [52] Somers, 2004 | 9C   | <i>ELF3</i> mRNA | LD 12:12 | wt,              |        |
| [52] Somers, 2004 | 9C   | <i>ELF3</i> mRNA | LD 12:12 | Z-ox             |        |
| [52] Somers, 2004 | 9C   | <i>ELF3</i> mRNA | LD 12:12 | ztl-1            |        |
| [52] Somers, 2004 | 9C   | <i>ELF3</i> mRNA | LD 12:12 | ztl-2            |        |
| [52] Somers, 2004 | 9C   | <i>ELF3</i> mRNA | LD 12:12 | ztl-3            |        |
| [52] Somers, 2004 | 9C   | <i>ELF3</i> mRNA | LL 12:12 | wt, Col          |        |
| [52] Somers, 2004 | 9C   | <i>ELF3</i> mRNA | LL 12:12 | wt, C24          |        |
| [52] Somers, 2004 | 9C   | <i>ELF3</i> mRNA | LL 12:12 | ztl-1, C24       |        |
| [52] Somers, 2004 | 9C   | <i>ELF3</i> mRNA | LL 12:12 | ztl-2, C24       |        |
| [52] Somers, 2004 | 9C   | <i>ELF3</i> mRNA | LL 12:12 | ztl-3, Col       |        |
| [52] Somers, 2004 | 9C   | <i>ELF3</i> mRNA | LL 12:12 | Z-ox             |        |
| [53] Song, 2005   | 1B   | <i>LHY</i> mRNA  | LD 12:12 | wt LHY:luc       |        |
| [53] Song, 2005   | 1B   | <i>LHY</i> mRNA  | LD 12:12 | det1-1 LHY:luc   |        |
| [53] Song, 2005   | 1D   | LHY pr           | LD 12:12 | wt               |        |
| [53] Song, 2005   | 1D   | LHY pr           | LD 12:12 | det1-1           |        |
| [53] Song, 2005   | 4B   | LHY pr           | LD 12:12 | lhy-1            |        |
| [53] Song, 2005   | 4B   | LHY pr           | LD 12:12 | lhy-1;det1-1     |        |
| [54] Song, 2012   | 4C   | <i>LHY</i> mRNA  | LD 16:8  | Col              |        |
| [54] Song, 2012   | 4C   | <i>LHY</i> mRNA  | LD 16:8  | elf3-1           |        |
| [54] Song, 2012   | 6C   | LHY pr           | LD 16:8  | elf3-1           |        |
| [54] Song, 2012   | 6D   | LHY pr           | LD 16:8  | wt               |        |
| [55] Wang, 1998   | 6    | <i>CCA1</i> mRNA | LL 12:12 | wt               |        |
| [55] Wang, 1998   | 6    | <i>CCA1</i> mRNA | LL 12:12 | C-ox             |        |
| [55] Wang, 1998   | 6    | <i>LHY</i> mRNA  | LL 12:12 | wt               |        |
| [55] Wang, 1998   | 6    | <i>LHY</i> mRNA  | LL 12:12 | C-ox             |        |
| [56] Wang, 2010   | 3B   | TOC1 pr          | LD 12:12 | prr5-1           |        |

| Ref.                 | Fig. | Reporter         | Light     | Mutant / Comment     | Weight |
|----------------------|------|------------------|-----------|----------------------|--------|
| [56] Wang, 2010      | 3B   | TOC1 pr          | LD 12:12  | wt                   |        |
| [56] Wang, 2010      | 3D   | <i>TOC1</i> mRNA | LD 12:12  | prp5-1               |        |
| [56] Wang, 2010      | 3D   | <i>TOC1</i> mRNA | LD 12:12  | wt, TMG              |        |
| [57] Yakir, 2009     | 1C   | CCA1 pr          | LL 14:10  | (quantified in GIMP) |        |
| [57] Yakir, 2009     | S2   | CCA1 pr          | LL 14:10  |                      |        |
| [57] Yakir, 2009     | 2E   | CCA1 pr          | LL 14:10? | CCA1::CCA1-HA-YFP    | cca1-1 |
| [57] Yakir, 2009     | 2E   | CCA1 pr          | DD 14:10? | CCA1::CCA1-HA-YFP    | cca1-1 |
| [58] Yamashino, 2008 | 4C   | <i>CCA1</i> mRNA | LD 12:12  | wt, Col              |        |
| [58] Yamashino, 2008 | 4C   | <i>CCA1</i> mRNA | LD 12:12  | prp9;prp7;prp5       |        |
| [58] Yamashino, 2008 | 4D   | <i>GI</i> mRNA   | LD 12:12  | wt, Col              |        |
| [58] Yamashino, 2008 | 4D   | <i>GI</i> mRNA   | LD 12:12  | cca1;lhy;toc1        |        |
| [58] Yamashino, 2008 | 4D   | <i>GI</i> mRNA   | LD 12:12  | prp9;prp7;prp5       |        |
| [58] Yamashino, 2008 | 5B   | <i>CCA1</i> mRNA | LD 12:12  | wt, Col              |        |
| [58] Yamashino, 2008 | 5B   | <i>CCA1</i> mRNA | LD 12:12  | prp9;prp7;prp5;toc1  |        |
| [58] Yamashino, 2008 | 5C   | <i>GI</i> mRNA   | LD 12:12  | wt, Col              |        |
| [58] Yamashino, 2008 | 5C   | <i>GI</i> mRNA   | LD 12:12  | cca1;lhy;toc1        |        |
| [58] Yamashino, 2008 | 5C   | <i>GI</i> mRNA   | LD 12:12  | prp9;prp7;prp5;toc1  |        |
| [59] Yu, 2008        | 3A   | <i>ELF3</i> mRNA | LD 8:16   | cop1-4               |        |
| [59] Yu, 2008        | 3A   | <i>ELF3</i> mRNA | LD 8:16   | wt                   |        |
| [59] Yu, 2008        | 3A   | <i>ELF3</i> mRNA | LD 16:8   | cop1-4               |        |
| [59] Yu, 2008        | 3A   | <i>ELF3</i> mRNA | LD 16:8   | wt                   |        |
| [59] Yu, 2008        | 3B   | <i>GI</i> mRNA   | LD 8:16   | cop1-4               |        |
| [59] Yu, 2008        | 3B   | <i>GI</i> mRNA   | LD 8:16   | wt                   |        |
| [59] Yu, 2008        | 3B   | <i>GI</i> mRNA   | LD 16:8   | cop1-4               |        |
| [59] Yu, 2008        | 3B   | <i>GI</i> mRNA   | LD 16:8   | wt                   |        |
| [59] Yu, 2008        | 5C   | E3 pr            | LD 8:16   | cop1-4, Col, nuc     |        |
| [59] Yu, 2008        | 5C   | E3 pr            | LD 8:16   | wt, Col, nuc         |        |
| [59] Yu, 2008        | 5C   | E3 pr            | LD 16:8   | cop1-4, Col, nuc     |        |
| [59] Yu, 2008        | 5C   | E3 pr            | LD 16:8   | wt, Col, nuc         |        |
| [59] Yu, 2008        | 5F   | <i>LHY</i> mRNA  | LD 12:12  | wt,                  |        |
| [59] Yu, 2008        | 5F   | <i>LHY</i> mRNA  | LD 12:12  | cop1-4               |        |
| [59] Yu, 2008        | 5F   | <i>LHY</i> mRNA  | LD 12:12  | E3-ox                |        |
| [59] Yu, 2008        | 5F   | <i>LHY</i> mRNA  | LD 12:12  | cop1-4;E3-ox         |        |
| [59] Yu, 2008        | 6E   | GI pr            | LD 8:16   | cop1-4               |        |
| [59] Yu, 2008        | 6E   | GI pr            | LD 8:16   | elf3-8               |        |
| [59] Yu, 2008        | 6E   | GI pr            | LD 8:16   | wt, left panel       |        |
| [59] Yu, 2008        | 6E   | GI pr            | LD 8:16   | wt, right panel      |        |

**Table 1. Data used for model fitting.** Each row corresponds to a time course of either mRNA or protein concentration in some light condition, extracted from the listed publications. All time courses were given a weight  $w_i = 1$  unless otherwise specified here. Increased weights were used where important results were otherwise found to be difficult to reproduce: *CCA1* oscillations in *toc1* [3], ZTL protein level in wt and mutants [26], interaction between *elf3* and *cca1;lhy* [6], period lengthening in *prp7;prp9* [9], small effects of PRR7-ox [10], small period shortening in PRR9-ox [37], and level changes and period preservation in PRR5-ox [44, 51]. Decreased weights were used for some DD data where the system became arrhythmic in wt [28]. Experimental data was obtained in many different light conditions, which were simulated in the model. LD, LL and DD refers to light/dark, constant light and constant dark, respectively. Numbers such as 12:12 refer to hours of light and dark per period during entrainment, and for LD also during measurements. RR is constant red light, which was simulated as LL. Data were not manipulated in any way (e.g. stitched, joined or normalized) before entering the costfunction described in Methods in the main text. All raw data are available from the website mentioned in main text.



## References

- [1] Alabadi D, Oyama T, Yanovsky MJ, Harmon FG, Más P, et al. (2001) Reciprocal regulation between TOC1 and LHY/CCA1 within the *Arabidopsis* circadian clock. *Science* 293: 880–883.
- [2] Baudry A, Ito S, Song YH, Strait AA, Kiba T, et al. (2010) F-box proteins FKF1 and LKP2 act in concert with ZEITLUPE to control *Arabidopsis* clock progression. *Plant Cell* 22: 606–622.
- [3] Dai S, Wei X, Pei L, Thompson RL, Liu Y, et al. (2011) BROTHER OF LUX ARRHYTHMO is a component of the *Arabidopsis* circadian clock. *Plant Cell* 23: 961–972.
- [4] David KM, Armbruster U, Tama N, Putterill J (2006) *Arabidopsis* GIGANTEA protein is post-transcriptionally regulated by light and dark. *FEBS Lett* 580: 1193–1197.
- [5] Ding Z, Doyle MR, Amasino RM, Davis SJ (2007) A complex genetic interaction between *Arabidopsis thaliana* TOC1 and CCA1/LHY in driving the circadian clock and in output regulation. *Genetics* 176: 1501–1510.
- [6] Dixon LE, Knox K, Kozma-Bognar L, Southern MM, Pokhilko A, et al. (2011) Temporal repression of core circadian genes is mediated through EARLY FLOWERING 3 in *Arabidopsis*. *Curr Biol* 21: 120–125.
- [7] Edwards KD, Akman OE, Knox K, Lumsden PJ, Thomson AW, et al. (2010) Quantitative analysis of regulatory flexibility under changing environmental conditions. *Mol Syst Biol* 6: 424.
- [8] Farinas B, Más P (2011) Functional implication of the MYB transcription factor RVE8/LCL5 in the circadian control of histone acetylation. *Plant J* 66: 318–329.
- [9] Farré EM, Harmer SL, Harmon FG, Yanovsky MJ, Kay SA (2005) Overlapping and distinct roles of PRR7 and PRR9 in the *Arabidopsis* circadian clock. *Curr Biol* 15: 47–54.
- [10] Farré EM, Kay SA (2007) PRR7 protein levels are regulated by light and the circadian clock in *Arabidopsis*. *Plant J* 52: 548–560.
- [11] Fowler S, Lee K, Onouchi H, Samach A, Richardson K, et al. (1999) GIGANTEA: a circadian clock-controlled gene that regulates photoperiodic flowering in *Arabidopsis* and encodes a protein with several possible membrane-spanning domains. *EMBO J* 18: 4679–4688.
- [12] Fujiwara S, Wang L, Han L, Suh SS, Salomé PA, et al. (2008) Post-translational regulation of the *Arabidopsis* circadian clock through selective proteolysis and phosphorylation of pseudo-response regulator proteins. *J Biol Chem* 283: 23073–23083.
- [13] Hazen SP, Schultz TF, Pruneda-Paz JL, Borevitz JO, Ecker JR, et al. (2005) LUX ARRHYTHMO encodes a MYB domain protein essential for circadian rhythms. *Proc Natl Acad Sci USA* 102: 10387–10392.
- [14] Helfer A, Nusinow DA, Chow BY, Gehrke AR, Bulyk ML, et al. (2011) LUX ARRHYTHMO encodes a nighttime repressor of circadian gene expression in the *Arabidopsis* core clock. *Curr Biol* 21: 126–133.
- [15] Herrero Serrano E (2011) A molecular basis of ELF3 action in the *Arabidopsis* circadian clock. Ph.D. thesis, Universität zu Köln.

- [16] Hicks KA, Albertson TM, Wagner DR (2001) EARLY FLOWERING 3 encodes a novel protein that regulates circadian clock function and flowering in *Arabidopsis*. *Plant Cell* 13: 1281–1292.
- [17] Hsu PY, Harmer SL (2012) Circadian phase has profound effects on differential expression analysis. *PLoS One* 7: e49853.
- [18] Hsu PY, Devisetty UK, Harmer SL (2013) Accurate timekeeping is controlled by a cycling activator in *Arabidopsis*. *eLife* 2: e00473.
- [19] Huang W, Pérez-García P, Pokhilko A, Millar A, Antoshechkin I, et al. (2012) Mapping the core of the *Arabidopsis* circadian clock defines the network structure of the oscillator. *Science* 336: 75–79.
- [20] Ito S, Niwa Y, Nakamichi N, Kawamura H, Yamashino T, et al. (2008) Insight into missing genetic links between two evening-expressed pseudo-response regulator genes TOC1 and PRR5 in the circadian clock-controlled circuitry in *Arabidopsis thaliana*. *Plant Cell Physiol* 49: 201–213.
- [21] Kaczorowski KA, Quail PH (2003) *Arabidopsis* PSEUDO-RESPONSE REGULATOR 7 is a signaling intermediate in phytochrome-regulated seedling deetiolation and phasing of the circadian clock. *Plant Cell* 15: 2654–2665.
- [22] Kiba T, Henriques R, Sakakibara H, Chua NH (2007) Targeted degradation of PSEUDO-RESPONSE REGULATOR 5 by an SCFZTL complex regulates clock function and photomorphogenesis in *Arabidopsis thaliana*. *Plant Cell* 19: 2516–2530.
- [23] Kikis EA, Khanna R, Quail PH (2005) ELF4 is a phytochrome-regulated component of a negative-feedback loop involving the central oscillator components CCA1 and LHY. *Plant J* 44: 300–313.
- [24] Kim JY, Song HR, Taylor BL, Carré IA (2003) Light-regulated translation mediates gated induction of the *Arabidopsis* clock protein LHY. *EMBO J* 22: 935–944.
- [25] Kim WY, Hicks KA, Somers DE (2005) Independent roles for EARLY FLOWERING 3 and ZEITLUPE in the control of circadian timing, hypocotyl length, and flowering time. *Plant Physiol* 139: 1557–1569.
- [26] Kim WY, Fujiwara S, Suh SS, Kim J, Kim Y, et al. (2007) ZEITLUPE is a circadian photoreceptor stabilized by GIGANTEA in blue light. *Nature* 449: 356–360.
- [27] Kim Y, Han S, Yeom M, Kim H, Lim J, et al. (2013) Balanced nucleocytoplasmic partitioning defines a spatial network to coordinate circadian physiology in plants. *Dev Cell* 26: 73–85.
- [28] Kolmos E, Nowak M, Werner M, Fischer K, Schwarz G, et al. (2009) Integrating ELF4 into the circadian system through combined structural and functional studies. *HFSP J* 3: 350–366.
- [29] Lau OS, Huang X, Charron JB, Lee JH, Li G, et al. (2011) Interaction of *Arabidopsis* DET1 with CCA1 and LHY in mediating transcriptional repression in the plant circadian clock. *Mol Cell* 43: 703–712.
- [30] Li G, Siddiqui H, Teng Y, Lin R, Wan Xy, et al. (2011) Coordinated transcriptional regulation underlying the circadian clock in *Arabidopsis*. *Nat Cell Biol* 13: 616–622.

- [31] Liu XL, Covington MF, Fankhauser C, Chory J, Wagner DR (2001) ELF3 encodes a circadian clock-regulated nuclear protein that functions in an *Arabidopsis* PHYB signal transduction pathway. *Plant Cell* 13: 1293–1304.
- [32] Locke JC, Southern MM, Kozma-Bognár L, Hibberd V, Brown PE, et al. (2005) Extension of a genetic network model by iterative experimentation and mathematical analysis. *Mol Syst Biol* 1: 2005.0013.
- [33] Lu SX, Webb CJ, Knowles SM, Kim SH, Wang Z, et al. (2012) CCA1 and ELF3 interact in the control of hypocotyl length and flowering time in *Arabidopsis*. *Plant Physiol* 158: 1079–1088.
- [34] Martin-Tryon EL, Kreps JA, Harmer SL (2007) GIGANTEA acts in blue light signaling and has biochemically separable roles in circadian clock and flowering time regulation. *Plant Physiol* 143: 473–486.
- [35] Más P, Kim WY, Somers DE, Kay SA, et al. (2003) Targeted degradation of TOC1 by ZTL modulates circadian function in *Arabidopsis thaliana*. *Nature* 426: 567–570.
- [36] Matsushika A, Makino S, Kojima M, Mizuno T (2000) Circadian waves of expression of the APRR1/TOC1 family of pseudo-response regulators in *Arabidopsis thaliana*: insight into the plant circadian clock. *Plant Cell Physiol* 41: 1002–1012.
- [37] Matsushika A, Imamura A, Yamashino T, Mizuno T (2002) Aberrant expression of the light-inducible and circadian-regulated APRR9 gene belonging to the circadian-associated APRR1/TOC1 quintet results in the phenotype of early flowering in *Arabidopsis thaliana*. *Plant Cell Physiol* 43: 833–843.
- [38] McWatters HG, Kolmos E, Hall A, Doyle MR, Amasino RM, et al. (2007) ELF4 is required for oscillatory properties of the circadian clock. *Plant Physiol* 144: 391–401.
- [39] Mizoguchi T, Wheatley K, Hanzawa Y, Wright L, Mizoguchi M, et al. (2002) LHY and CCA1 are partially redundant genes required to maintain circadian rhythms in *Arabidopsis*. *Dev Cell* 2: 629–641.
- [40] Nakamichi N, Matsushika A, Yamashino T, Mizuno T (2003) Cell autonomous circadian waves of the APRR1/TOC1 quintet in an established cell line of *Arabidopsis thaliana*. *Plant Cell Physiol* 44: 360–365.
- [41] Nakamichi N, Kita M, Ito S, Sato E, Yamashino T, et al. (2005) The *Arabidopsis* pseudo-response regulators, PRR5 and PRR7, coordinately play essential roles for circadian clock function. *Plant Cell Physiol* 46: 609–619.
- [42] Nakamichi N, Kita M, Ito S, Yamashino T, Mizuno T (2005) PSEUDO-RESPONSE REGULATORS, PRR9, PRR7 and PRR5, together play essential roles close to the circadian clock of *Arabidopsis thaliana*. *Plant Cell Physiol* 46: 686–698.
- [43] Nakamichi N, Kiba T, Henriques R, Mizuno T, Chua NH, et al. (2010) PSEUDO-RESPONSE REGULATORS 9, 7, and 5 are transcriptional repressors in the *Arabidopsis* circadian clock. *Plant Cell* 22: 594–605.
- [44] Nakamichi N, Kiba T, Kamioka M, Suzuki T, Yamashino T, et al. (2012) Transcriptional repressor PRR5 directly regulates clock-output pathways. *Proc Natl Acad Sci USA* 109: 17123–17128.

- [45] Niwa Y, Ito S, Nakamichi N, Mizoguchi T, Niinuma K, et al. (2007) Genetic linkages of the circadian clock-associated genes, TOC1, CCA1 and LHY, in the photoperiodic control of flowering time in *Arabidopsis thaliana*. *Plant Cell Physiol* 48: 925–937.
- [46] Nusinow DA, Helfer A, Hamilton EE, King JJ, Imaizumi T, et al. (2011) The ELF4-ELF3-LUX complex links the circadian clock to diurnal control of hypocotyl growth. *Nature* 475: 398–402.
- [47] Onai K, Ishiura M (2005) PHYTOCLOCK 1 encoding a novel GARP protein essential for the *Arabidopsis* circadian clock. *Genes Cells* 10: 963–972.
- [48] Park DH, Somers DE, Kim YS, Choy YH, Lim HK, et al. (1999) Control of circadian rhythms and photoperiodic flowering by the *Arabidopsis* GIGANTEA gene. *Science* 285: 1579–1582.
- [49] Pokhilko A, Fernández AP, Edwards KD, Southern MM, Halliday KJ, et al. (2012) The clock gene circuit in *Arabidopsis* includes a repressilator with additional feedback loops. *Mol Syst Biol* 8: 574.
- [50] Rawat R, Takahashi N, Hsu PY, Jones MA, Schwartz J, et al. (2011) REVEILLE 8 and PSEUDO-REPONSE REGULATOR 5 form a negative feedback loop within the *Arabidopsis* circadian clock. *PLoS Genet* 7: e1001350.
- [51] Sato E, Nakamichi N, Yamashino T, Mizuno T (2002) Aberrant expression of the *Arabidopsis* circadian-regulated APRR5 gene belonging to the APRR1/TOC1 quintet results in early flowering and hypersensitiveness to light in early photomorphogenesis. *Plant Cell Physiol* 43: 1374–1385.
- [52] Somers DE, Kim WY, Geng R (2004) The F-box protein ZEITLUPE confers dosage-dependent control on the circadian clock, photomorphogenesis, and flowering time. *Plant Cell* 16: 769–782.
- [53] Song HR, Carré IA (2005) DET1 regulates the proteasomal degradation of LHY, a component of the *Arabidopsis* circadian clock. *Plant Mol Biol* 57: 761–771.
- [54] Song HR (2012) Interaction between the late elongated hypocotyl (LHY) and early flowering 3 (ELF3) genes in the *Arabidopsis* circadian clock. *Genes Genomics* 34: 329–337.
- [55] Wang ZY, Tobin EM, et al. (1998) Constitutive expression of the CIRCADIAN CLOCK ASSOCIATED 1 (CCA1) gene disrupts circadian rhythms and suppresses its own expression. *Cell* 93: 1207–1218.
- [56] Wang L, Fujiwara S, Somers DE (2010) PRR5 regulates phosphorylation, nuclear import and subnuclear localization of TOC1 in the *Arabidopsis* circadian clock. *EMBO J* 29: 1903–1915.
- [57] Yakir E, Hilman D, Kron I, Hassidim M, Melamed-Book N, et al. (2009) Posttranslational regulation of CIRCADIAN CLOCK ASSOCIATED 1 in the circadian oscillator of *Arabidopsis*. *Plant Physiol* 150: 844–857.
- [58] Yamashino T, Ito S, Niwa Y, Kunihiro A, Nakamichi N, et al. (2008) Involvement of *Arabidopsis* clock-associated pseudo-response regulators in diurnal oscillations of gene expression in the presence of environmental time cues. *Plant Cell Physiol* 49: 1839–1850.
- [59] Yu JW, Rubio V, Lee NY, Bai S, Lee SY, et al. (2008) COP1 and ELF3 control circadian function and photoperiodic flowering by regulating GI stability. *Mol Cell* 32: 617–630.
