# Supplementary material for: Rethinking Transcriptional Activation in the Arabidopsis Circadian Clock
Source: PLOS journal article supplement (doi:10.1371/journal.pcbi.1003705), 2014-07-17
Supplement: S9 (10.1371/journal.pcbi.1003705.s009) [file journal.pcbi.1003705.s009]

301 Moved Permanently

# Moved Permanently

The document has moved here.

---

Apache Server at www.ploscompbiol.org Port 80
